# Supplementary material for: Microenvironmental Hypoxia Induces Dynamic Changes in Lung Cancer Synthesis and Secretion of Extracellular Vesicles
Source: Cancers (Basel). 2020 Oct 11;12(10):2917. doi: 10.3390/cancers12102917 (PMC7601203; doi:10.3390/cancers12102917)
Supplement: Supplementary file 1 [file cancers-12-02917-s001.zip]

Archive with 4 entries (4 files):
- Supplementary Figures.pdf
- Supplementary Table.pdf
- Supplementary_data_A549_cell_lysate_pSILAC.xlsx
- Supplementary_data_A549_EVs_pSILAC.xls
