# Supplementary material for: Microenvironmental Hypoxia Induces Dynamic Changes in Lung Cancer Synthesis and Secretion of Extracellular Vesicles
Source: Cancers (Basel). 2020 Oct 11;12(10):2917. doi: 10.3390/cancers12102917 (PMC7601203; doi:10.3390/cancers12102917)
Supplement: Supplementary file 1 [file cancers-12-02917-s001.zip › Supplementary Figures.pdf]

# A549 EVs

## Nx Hx

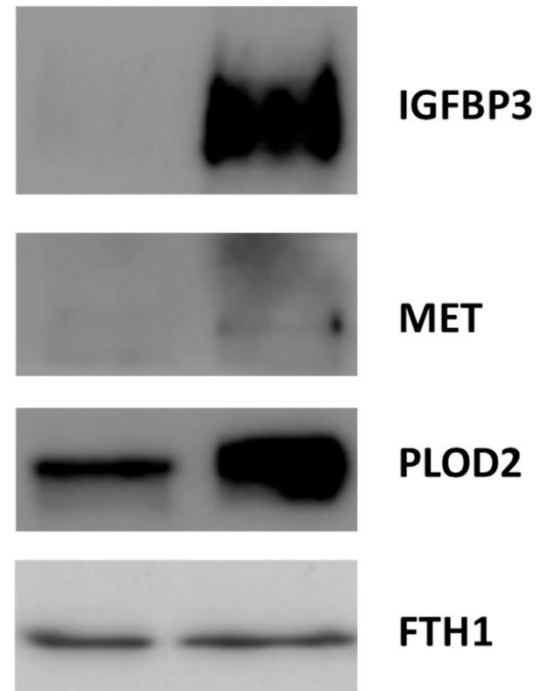

**Figure S1. Validation of newly synthesized proteins using Western blots.** Several EVs proteins that were classified as newly synthesised in Table 1 were selected and validated using non-SILAC labelled EVs isolated from A549 lung cancer cells cultured under normal culture conditions or hypoxia. Experiment was repeated with 3 biological replicate.

| Protein Name (Gene Symbol)                                            | GO:0005604~basement<br>membrane | GO:0030198~extracellular<br>matrix organization | GO:0031012~extracellular<br>matrix | H/L    | emPAI  |
|-----------------------------------------------------------------------|---------------------------------|-------------------------------------------------|------------------------------------|--------|--------|
| matrilin 2(MATN2)                                                     |                                 |                                                 |                                    | 100.00 | 0.05   |
| Fraser extracellular matrix complex subunit 1(FRAS1)                  |                                 |                                                 |                                    | 6.77   | 0.29   |
| TIMP metalloproteinase inhibitor 1(TIMPI)                             |                                 |                                                 |                                    | 10.85  | 3.33   |
| cystatin C(CST3)                                                      |                                 |                                                 |                                    | 8.57   | 0.59   |
| amyloid beta precursor protein(APP)                                   |                                 |                                                 |                                    | 20.85  | 0.90   |
| cadherin 1(CDH1)                                                      |                                 |                                                 |                                    | 2.67   | 0.19   |
| thrombospondin 1(THBS1)                                               |                                 |                                                 |                                    | 3.32   | 4.62   |
| serpin family E member 1(SERPINE1)                                    |                                 |                                                 |                                    | 2.88   | 1.02   |
| secreted phosphoprotein 1(SPP1)                                       |                                 |                                                 |                                    | 100.00 | 0.70   |
| EGF containing fibulin like extracellular matrix protein 1(EFEMP1)    |                                 |                                                 |                                    | 35.79  | 0.30   |
| hyaluronan and proteoglycan link protein 3(HAPLN3)                    |                                 |                                                 |                                    | 7.02   | 0.62   |
| collagen type XII alpha 1 chain(COL12A1)                              |                                 |                                                 |                                    | 100.00 | 0.03   |
| galectin 3 binding protein(LGALS3BP)                                  |                                 |                                                 |                                    | 6.32   | 173.75 |
| bone morphogenetic protein 1(BMP1)                                    |                                 |                                                 |                                    | 13.78  | 0.17   |
| cartilage associated protein(CRTAP)                                   |                                 |                                                 |                                    | 7.44   | 0.98   |
| SPARC/osteonectin, cwcv and kazal like domains proteoglycan 1(SPOCK1) |                                 |                                                 |                                    | 79.73  | 0.59   |
| matrix metalloproteinase 7(MMP7)                                      |                                 |                                                 |                                    | 100.00 | 0.19   |
| matrix metalloproteinase 2(MMP2)                                      |                                 |                                                 |                                    | 100.00 | 0.19   |
| cochlin(COCH)                                                         |                                 |                                                 |                                    | 65.09  | 0.16   |
| dystroglycan 1(DAG1)                                                  |                                 |                                                 |                                    | 100.00 | 0.10   |
| lysyl oxidase like 2(LOXL2)                                           |                                 |                                                 |                                    | 9.92   | 1.11   |
| fibrillin 2(FBN2)                                                     |                                 |                                                 |                                    | 8.87   | 0.18   |
| collagen type V alpha 2 chain(COL5A2)                                 |                                 |                                                 |                                    | 11.70  | 0.14   |
| collagen type VI alpha 1 chain(COL6A1)                                |                                 |                                                 |                                    | 5.98   | 1.13   |
| fibronectin 1(FN1)                                                    |                                 |                                                 |                                    | 7.73   | 6.78   |
| collagen type IV alpha 2 chain(COL4A2)                                |                                 |                                                 |                                    | 4.32   | 0.15   |
| agrin(AGRN)                                                           |                                 |                                                 |                                    | 4.39   | 8.58   |
| heparan sulfate proteoglycan 2(HSPG2)                                 |                                 |                                                 |                                    | 5.31   | 5.16   |
| fibrillin 1(FBN1)                                                     |                                 |                                                 |                                    | 52.19  | 0.06   |
| secreted protein acidic and cysteine rich(SPARC)                      |                                 |                                                 |                                    | 5.63   | 0.97   |
| fibulin 1(FBLN1)                                                      |                                 |                                                 |                                    | 8.99   | 0.73   |
| transforming growth factor beta induced(TGFB1)                        |                                 |                                                 |                                    | 7.86   | 7.96   |
| collagen type XVIII alpha 1 chain(COL18A1)                            |                                 |                                                 |                                    | 4.35   | 0.61   |
| collagen type V alpha 1 chain(COL5A1)                                 |                                 |                                                 |                                    | 4.34   | 0.82   |
| collagen type VII alpha 1 chain(COL7A1)                               |                                 |                                                 |                                    | 3.02   | 1.19   |
| coiled-coil domain containing 80(CCDC80)                              |                                 |                                                 |                                    | 68.76  | 0.22   |
| laminin subunit gamma 1(LAMC1)                                        |                                 |                                                 |                                    | 2.55   | 15.28  |
| nidogen 2(NID2)                                                       |                                 |                                                 |                                    | 37.98  | 0.12   |
| laminin subunit alpha 5(LAMA5)                                        |                                 |                                                 |                                    | 4.18   | 6.93   |
| laminin subunit alpha 3(LAMA3)                                        |                                 |                                                 |                                    | 67.13  | 0.11   |
| von Willebrand factor A domain containing 1(VWA1)                     |                                 |                                                 |                                    | 8.14   | 1.15   |

**Figure S2. Annotation clusters of extracellular matrix related protein found in EVs derived from A549 cells cultured under normal culture conditions.** EV proteins associated with the corresponding gene terms are shown in green. Proteins not reported to be associated with the gene terms are shown in black. H/L ratios and relative abundance (emPAI) of each proteins were extracted from pSILAC data.

| Protein Name (Gene Symbol)                           | GO:0043202~lysosomal lumen | GO:0005764~lysosome | Hydrolase | H/L    | emPAI  |
|------------------------------------------------------|----------------------------|---------------------|-----------|--------|--------|
| heparan sulfate proteoglycan 2(HSPG2)                |                            |                     |           | 3.41   | 3.06   |
| tubulointerstitial nephritis antigen like 1(TINAGL1) |                            |                     |           | 100.00 | 0.21   |
| cystatin C(CST3)                                     |                            |                     |           | 6.53   | 1.51   |
| carboxypeptidase, vitellogenic like(CPVL)            |                            |                     |           | 56.67  | 0.19   |
| eukaryotic translation initiation factor 4A3(EIF4A3) |                            |                     |           | 2.38   | 0.32   |
| amyloid beta precursor protein(APP)                  |                            |                     |           | 14.24  | 2.25   |
| pappalysin 1(PAPPA)                                  |                            |                     |           | 2.42   | 11.23  |
| protein tyrosine phosphatase, receptor type D(PTPRD) |                            |                     |           | 3.36   | 0.13   |
| fucosidase, alpha-L- 2, plasma(FUCA2)                |                            |                     |           | 3.15   | 3.26   |
| complement C1r(C1R)                                  |                            |                     |           | 11.47  | 16.30  |
| bone morphogenetic protein 1(BMP1)                   |                            |                     |           | 6.49   | 0.37   |
| protein tyrosine phosphatase, receptor type J(PTPRJ) |                            |                     |           | 11.23  | 0.27   |
| complement C1s(C1S)                                  |                            |                     |           | 16.01  | 8.35   |
| protein tyrosine phosphatase, receptor type S(PTPRS) |                            |                     |           | 5.42   | 0.40   |
| complement factor D(CFD)                             |                            |                     |           | 100.00 | 0.39   |
| matrix metalloproteinase 7(MMP7)                     |                            |                     |           | 100.00 | 0.43   |
| matrix metalloproteinase 2(MMP2)                     |                            |                     |           | 53.76  | 0.12   |
| plasminogen activator, urokinase(PLAU)               |                            |                     |           | 100.00 | 0.09   |
| protease, serine 23(PRSS23)                          |                            |                     |           | 3.44   | 0.23   |
| low density lipoprotein receptor(LDLR)               |                            |                     |           | 4.31   | 0.98   |
| transmembrane protein 59(TMEM59)                     |                            |                     |           | 100.00 | 0.13   |
| mannosidase alpha class 2B member 2(MAN2B2)          |                            |                     |           | 66.07  | 0.36   |
| NPC intracellular cholesterol transporter 2(NPC2)    |                            |                     |           | 2.32   | 0.23   |
| fucosidase, alpha-L- 1, tissue(FUCA1)                |                            |                     |           | 3.13   | 0.20   |
| proprotein convertase subtilisin/kexin type 9(PCSK9) |                            |                     |           | 94.84  | 0.69   |
| gamma-glutamyl hydrolase(GGH)                        |                            |                     |           | 3.89   | 21.39  |
| prosaposin(PSAP)                                     |                            |                     |           | 11.83  | 18.68  |
| hexosaminidase subunit alpha(HEXA)                   |                            |                     |           | 2.37   | 1.68   |
| hexosaminidase subunit beta(HEXB)                    |                            |                     |           | 2.34   | 2.28   |
| galactosidase beta 1(GLB1)                           |                            |                     |           | 100.00 | 0.23   |
| galactosamine (N-acetyl)                             |                            |                     |           | 4.85   | 0.49   |
| mannosidase alpha class 2B member 1(MAN2B1)          |                            |                     |           | 3.15   | 0.49   |
| mannosidase beta(MANBA)                              |                            |                     |           | 61.97  | 0.44   |
| deoxyribonuclease 2, lysosomal(DNASE2)               |                            |                     |           | 100.00 | 0.31   |
| aspartylglucosaminidase(AGA)                         |                            |                     |           | 2.88   | 0.59   |
| cathepsin B(CTSB)                                    |                            |                     |           | 8.41   | 145.78 |
| cathepsin C(CTSC)                                    |                            |                     |           | 4.97   | 1.87   |
| legumain(LGMN)                                       |                            |                     |           | 8.38   | 0.62   |
| palmitoyl-protein thioesterase 1(PPT1)               |                            |                     |           | 69.78  | 0.17   |
| glucosamine (N-acetyl)                               |                            |                     |           | 3.98   | 2.05   |
| cathepsin A(CTSA)                                    |                            |                     |           | 21.02  | 0.74   |
| neuraminidase 1(NEU1)                                |                            |                     |           | 32.96  | 0.82   |
| galactosidase alpha(GLA)                             |                            |                     |           | 3.36   | 0.64   |
| cathepsin D(CTSD)                                    |                            |                     |           | 6.79   | 271.13 |
| tripeptidyl peptidase 1(TPP1)                        |                            |                     |           | 45.03  | 0.98   |
| N-acylsphingosine amidohydrolase 1(ASAH1)            |                            |                     |           | 2.37   | 0.61   |
| glucosidase alpha, acid(GAA)                         |                            |                     |           | 7.25   | 0.47   |

**Figure S3. Annotation clusters of extracellular matrix related protein found in EVs derived from A549 cells cultured under hypoxia (Hx).** EV proteins associated with the corresponding gene terms are shown in green. Proteins not reported to be associated with the gene terms are shown in black. H/L ratios and relative abundance (emPAI) of each proteins were extracted from pSILAC data.

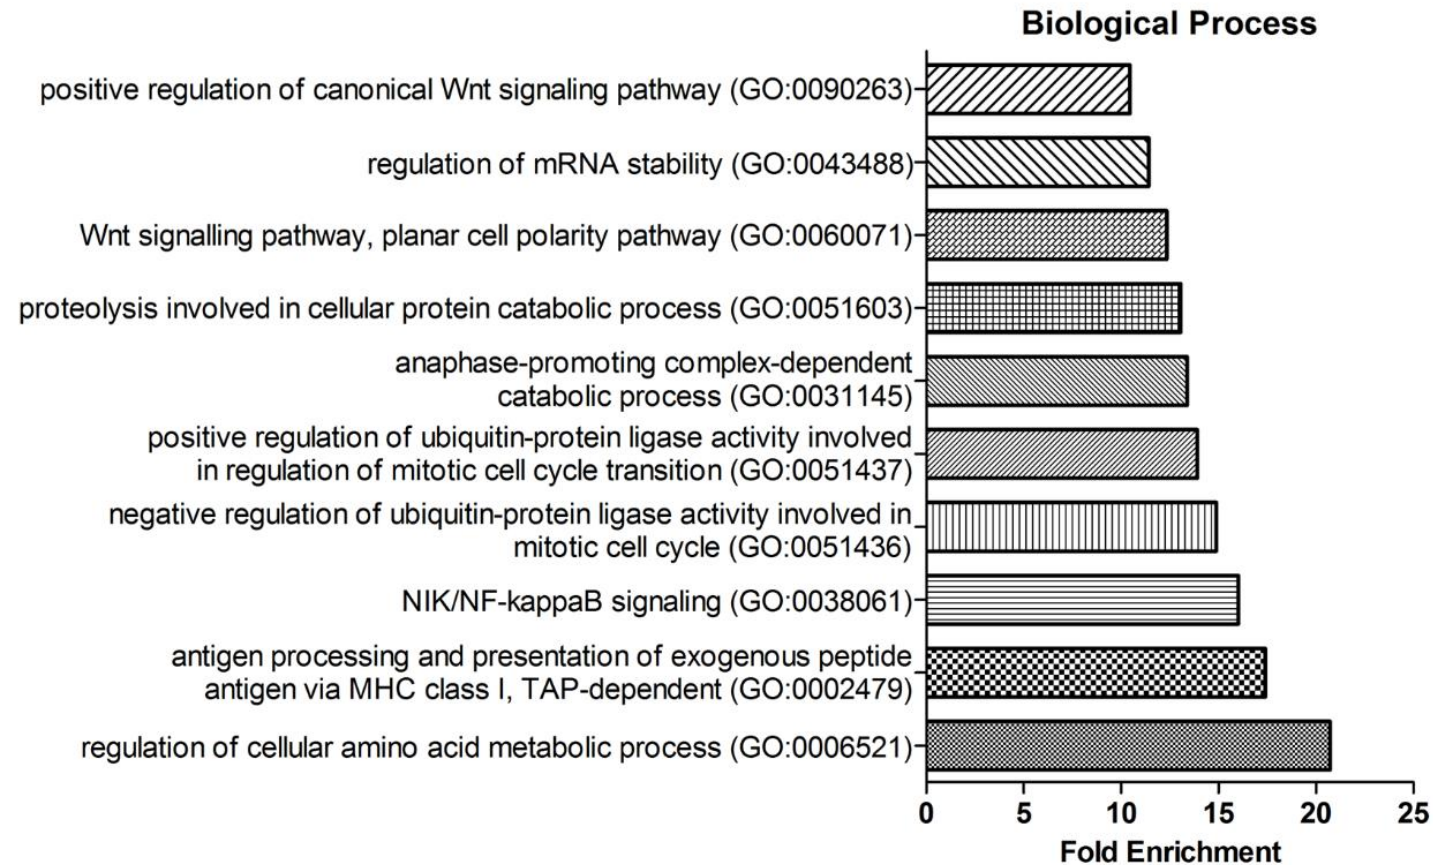

**Figure S4. Gene ontology analysis revealed biological process associated with proteins (n=443) found in both condition (Nx and Hx) that had similar H/L ratios.**

# Supplementary Figure 5: Uncropped western blot images

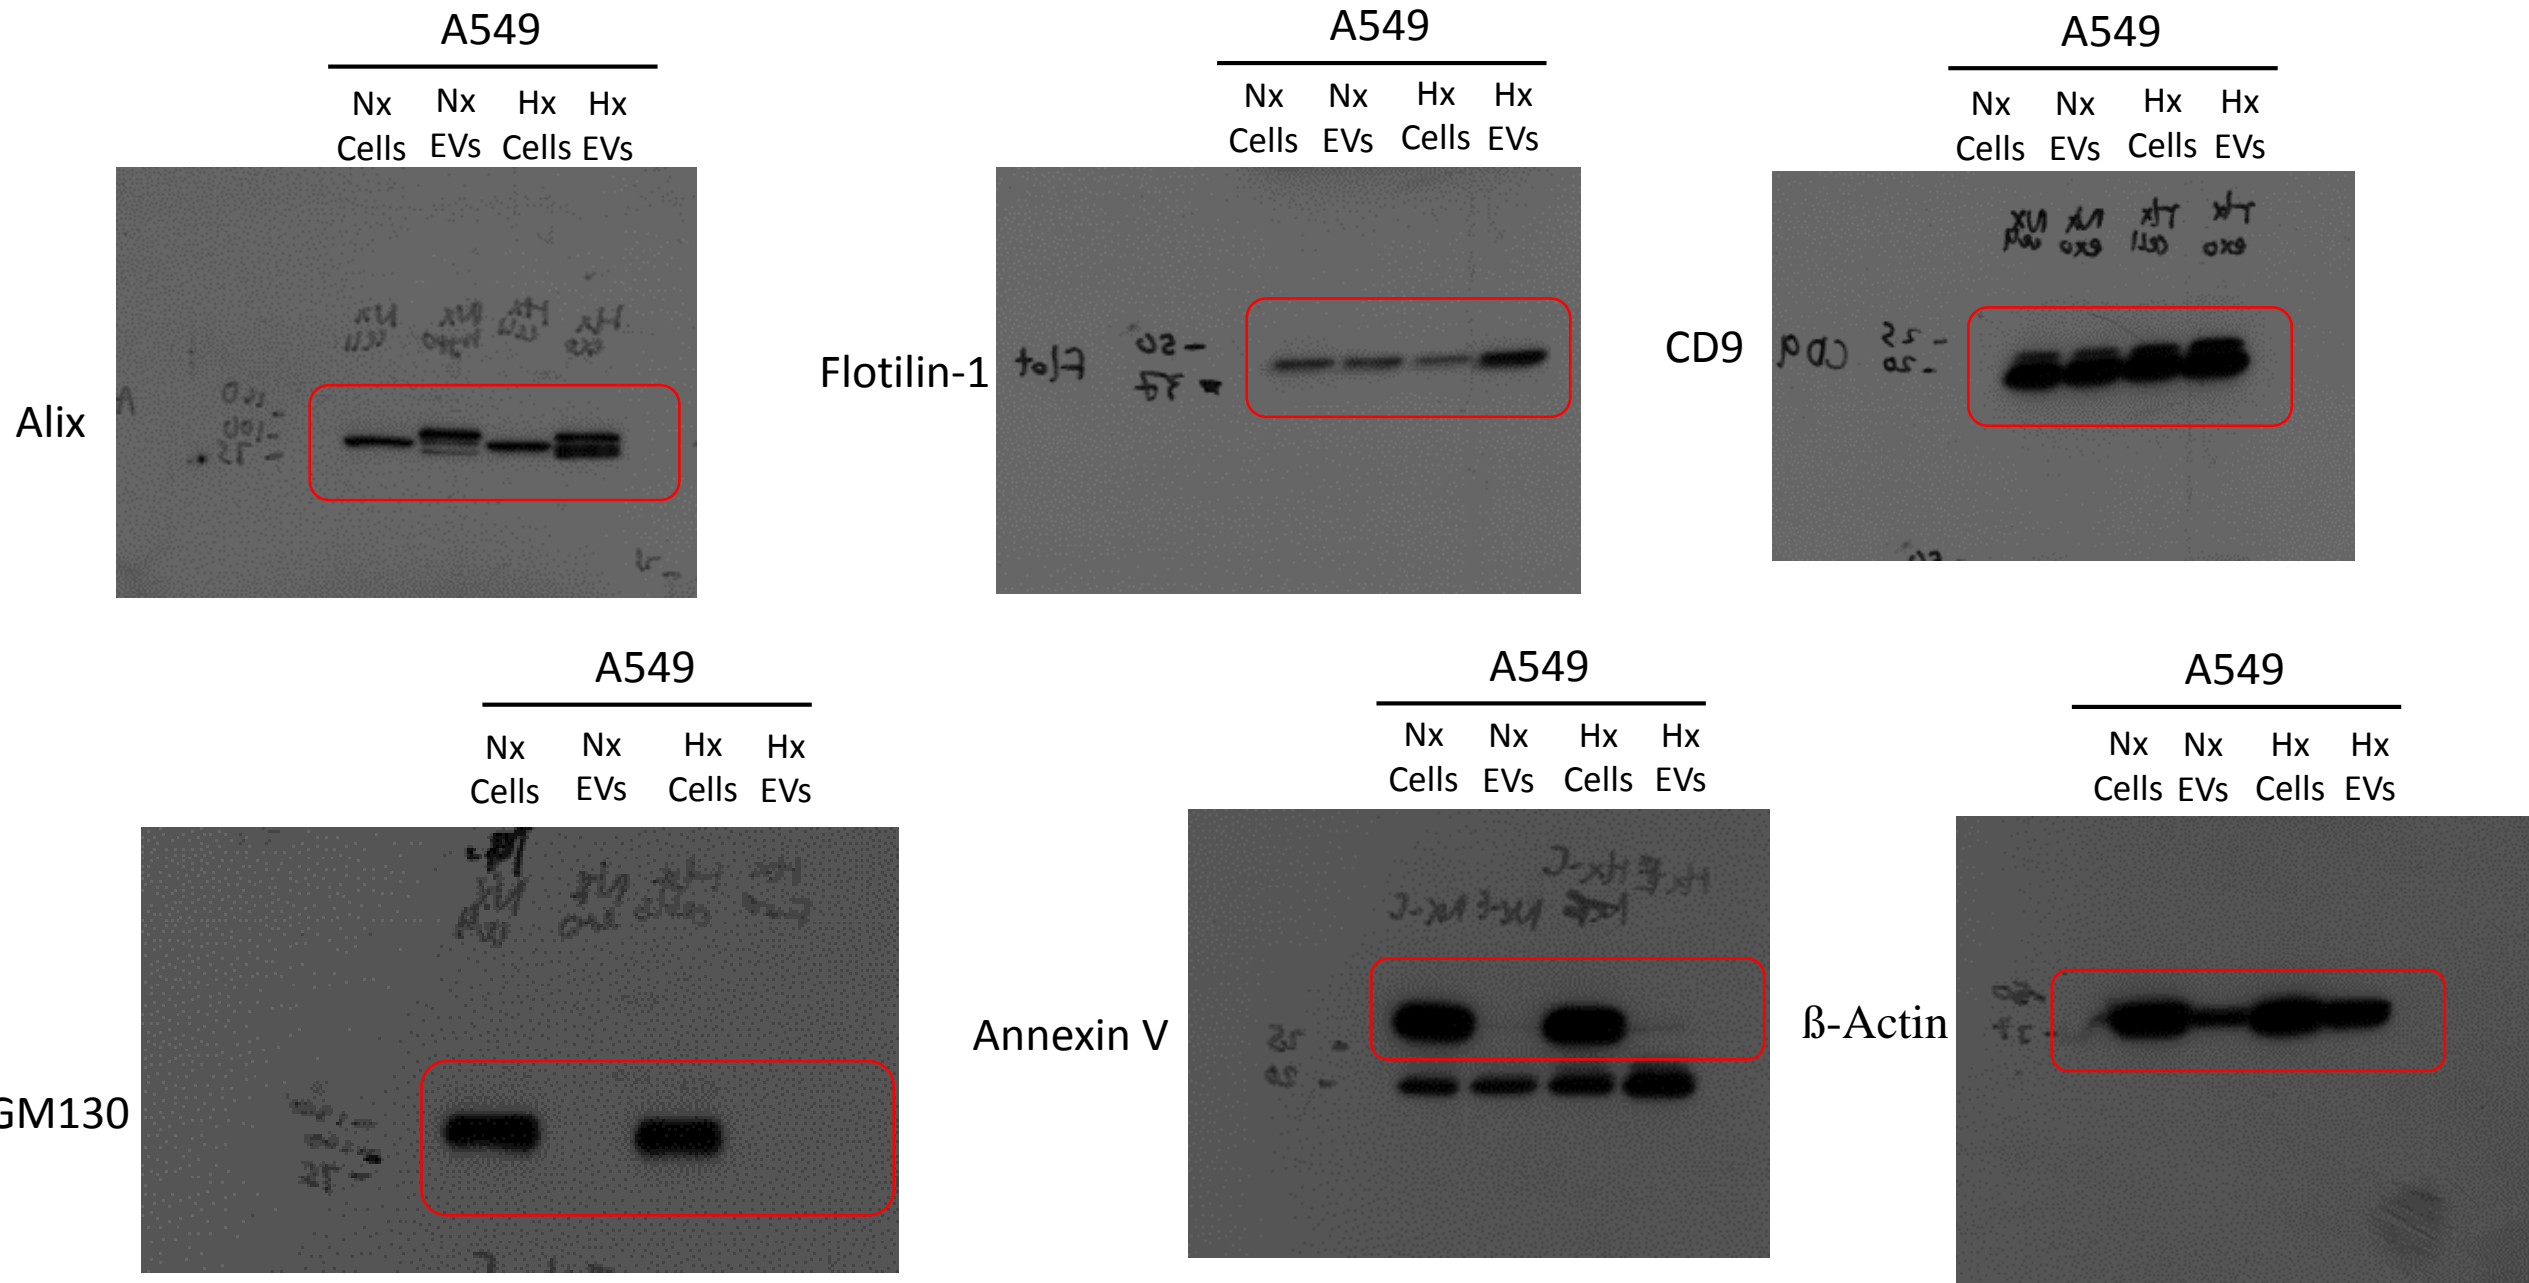

Uncropped western blot images for Figure 1D

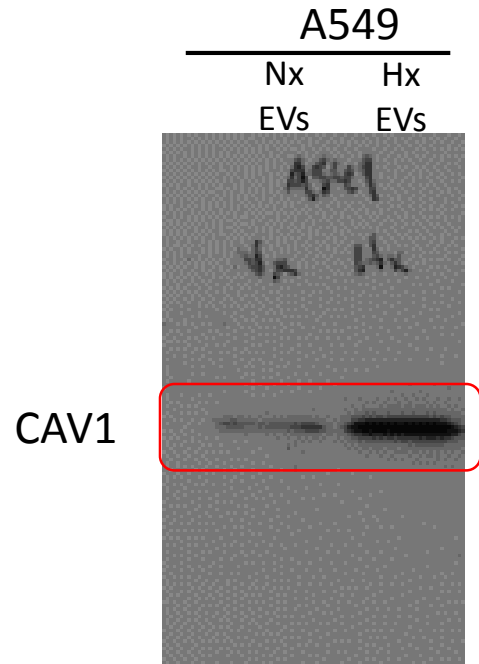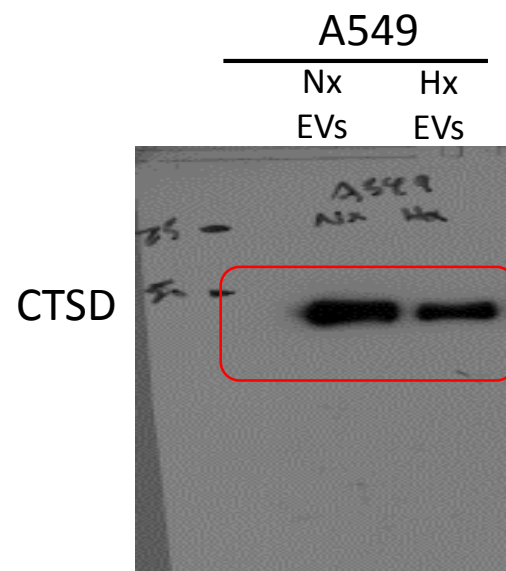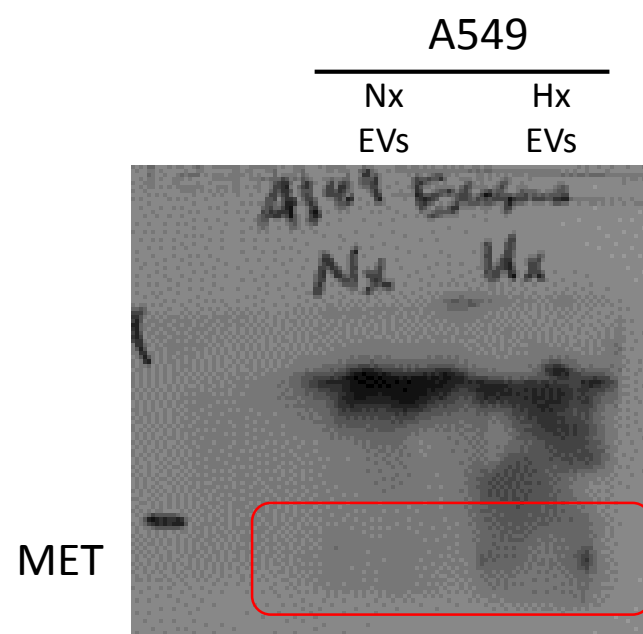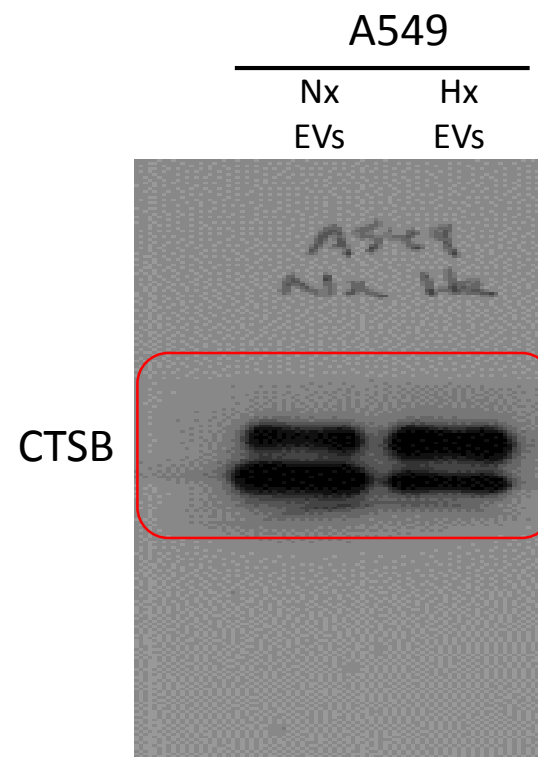

Uncropped western blot images for Figure 3B

N-cadherin

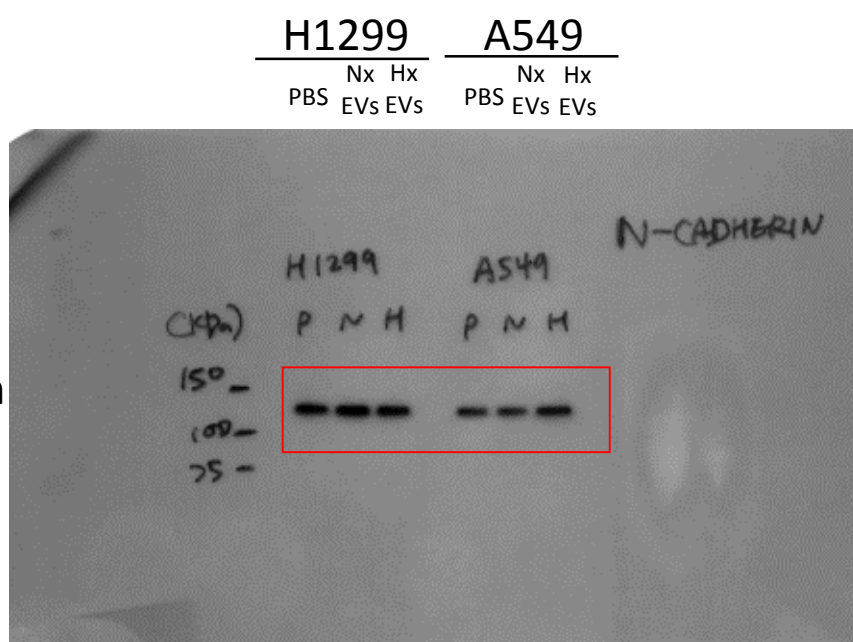

E-cadherin

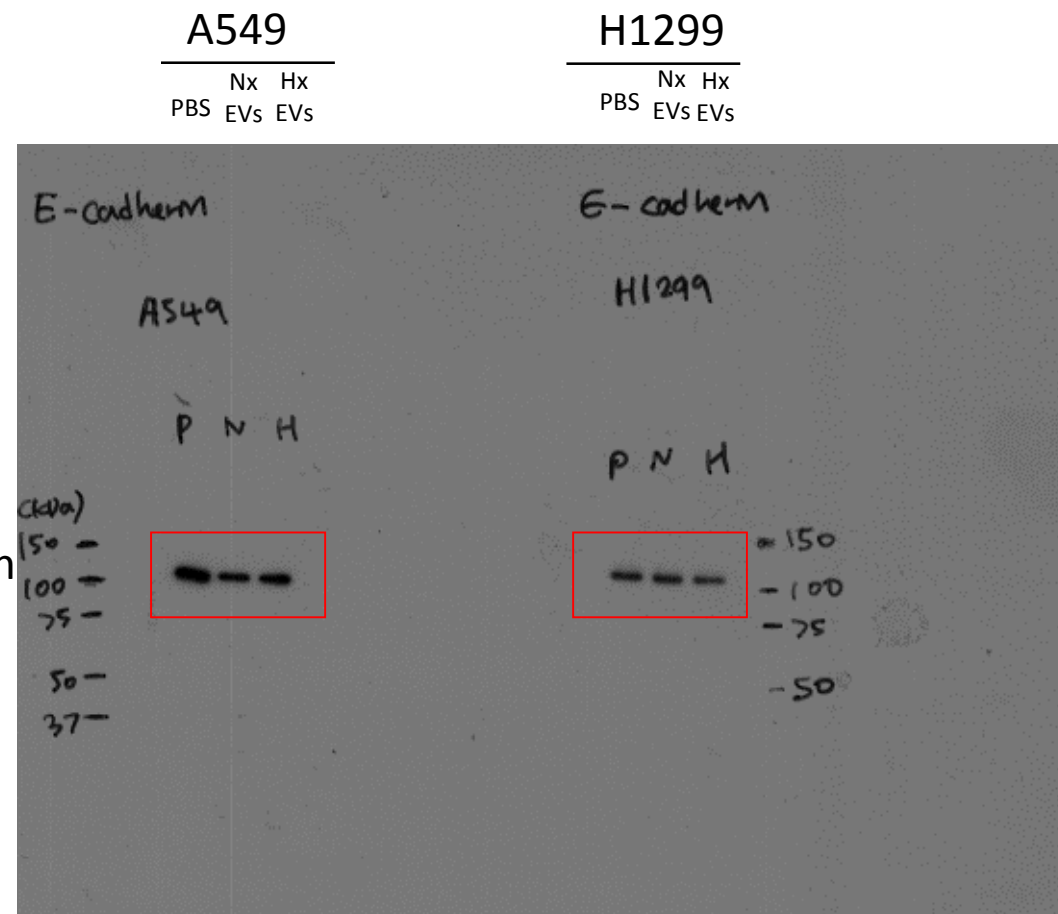

GAPDH

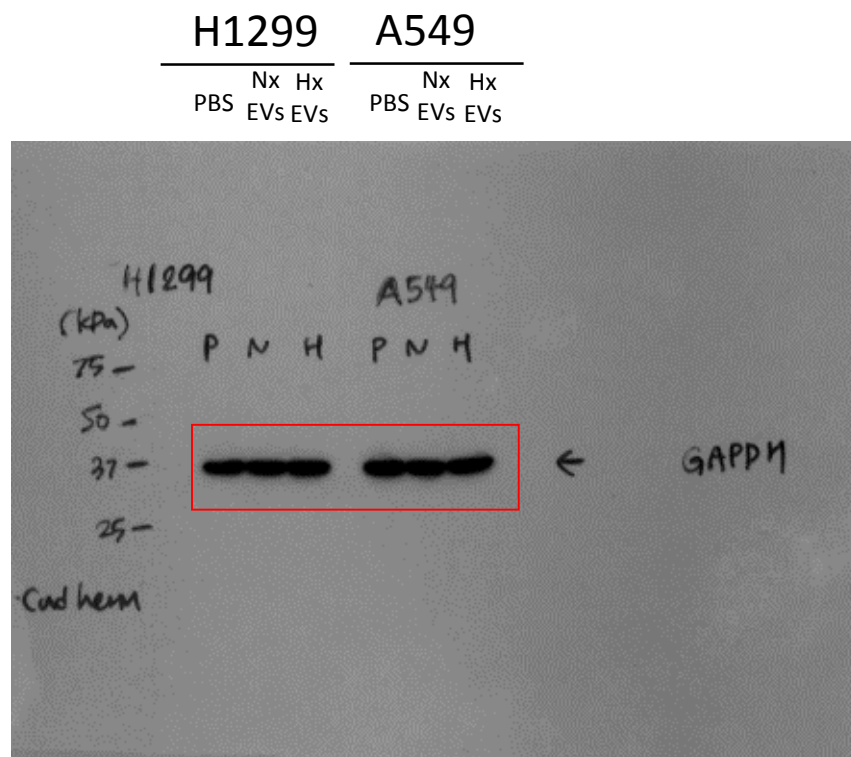

Uncropped western blot image of Figure 4C

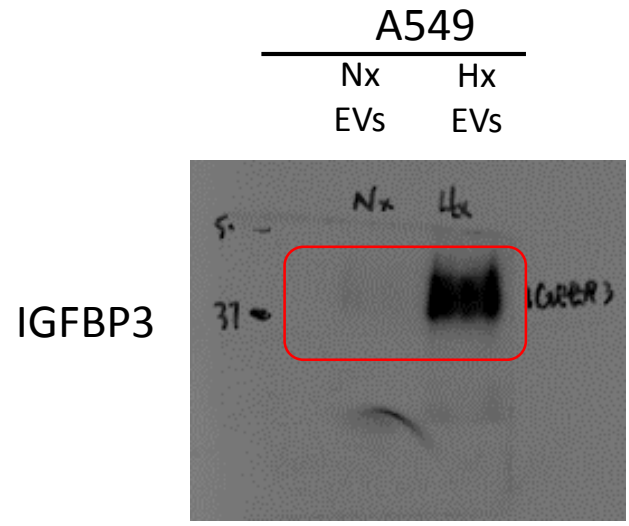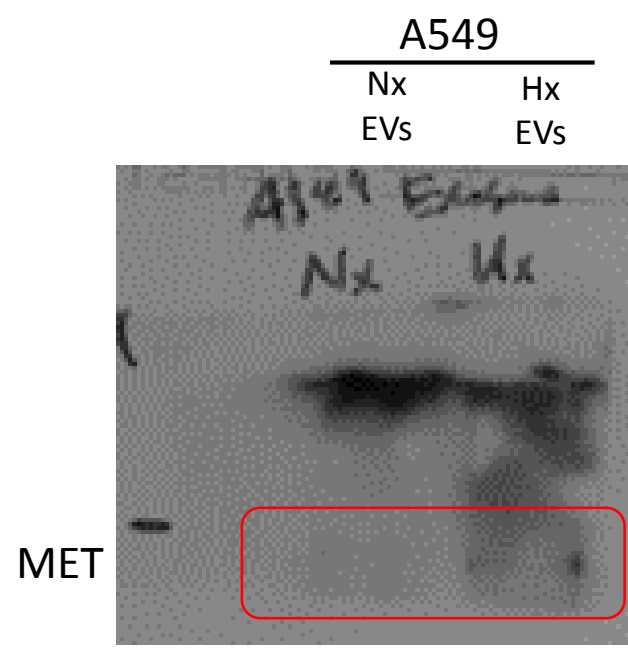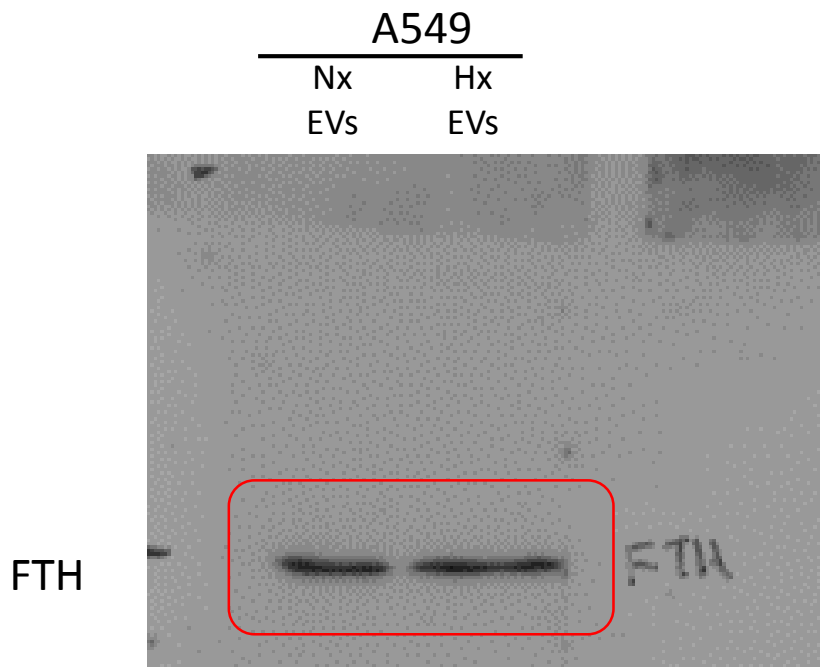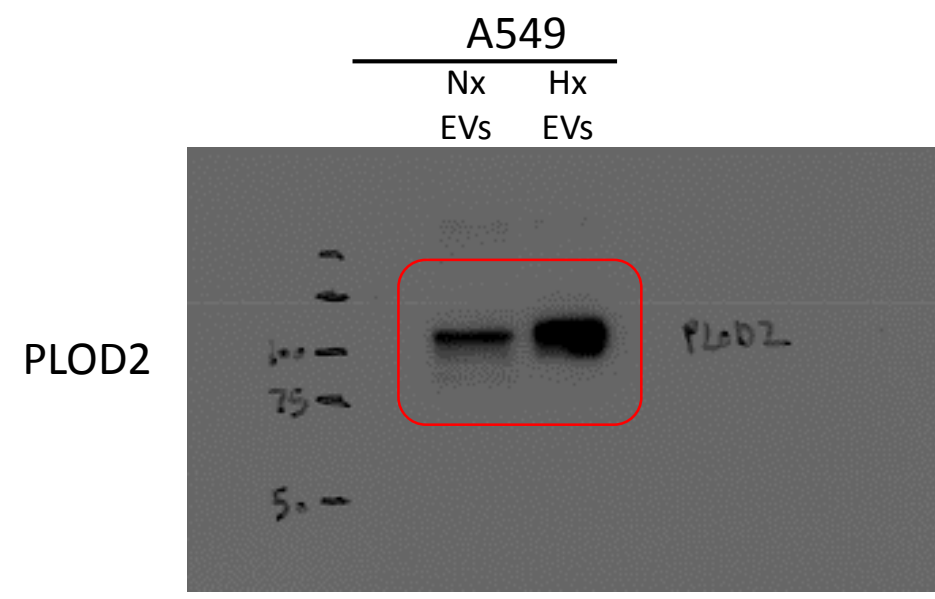

Uncropped western blot images for Figure S1
