# Supplementary material for: Microenvironmental Hypoxia Induces Dynamic Changes in Lung Cancer Synthesis and Secretion of Extracellular Vesicles
Source: Cancers (Basel). 2020 Oct 11;12(10):2917. doi: 10.3390/cancers12102917 (PMC7601203; doi:10.3390/cancers12102917)
Supplement: Supplementary file 1 [file cancers-12-02917-s001.zip › Supplementary Table.pdf]

# Table S.1

List of top 25 most commonly identified EV markers from Exocarta

| Gene Symbol | NxEVs H/L | NxEVs emPAI | HxEVs H/L | HxEVs emPAI |
|-------------|-----------|-------------|-----------|-------------|
| HSPA8       | 0.16      | 2.07        | 0.04      | 2.89        |
| CD9         | 0.53      | 26.83       | 0.37      | 11.92       |
| GAPDH       | 0.26      | 12.90       | 0.14      | 172.02      |
| ACTB        | 0.22      | 271.13      | 0.13      | 221.75      |
| CD63        | N/A       | N/A         | N/A       | N/A         |
| CD81        | 0.95      | 6.94        | 0.65      | 5.21        |
| ANXA2       | 0.15      | 120.15      | 0.16      | 463.16      |
| ENO1        | 0.24      | 19.43       | 0.23      | 136.38      |
| HSP90AA1    | 0.16      | 4.18        | 0.09      | 9.48        |
| EEF1A1      | 0.09      | 2.31        | 0.02      | 2.02        |
| PKM         | 0.19      | 2.93        | 0.24      | 7.30        |
| YWHAE       | 0.20      | 76.43       | 0.15      | 39.84       |
| SDCBP       | 2.38      | 128.16      | 1.57      | 17.96       |
| PDCD6IP     | 0.13      | 2.62        | 0.07      | 4.26        |
| ALB         | 0.01      | 2.94        | 0.01      | 3.64        |
| YWHAZ       | 0.23      | 25.37       | 0.21      | 5.95        |
| EEF2        | 0.01      | 0.09        | 0.01      | 0.41        |
| ACTG1       | N/A       | N/A         | N/A       | N/A         |
| LDHA        | 0.17      | 38.81       | 0.20      | 108.65      |
| HSP90AB1    | 0.13      | 2.62        | 0.07      | 4.26        |
| ALDOA       | 0.27      | 80.86       | 0.36      | 331.46      |
| MSN         | 0.09      | 0.32        | 0.08      | 1.08        |
| ANXA5       | 0.25      | 1.65        | 0.18      | 1.22        |
| PGK1        | 0.17      | 0.85        | 0.77      | 4.41        |
| CFL1        | 0.19      | 2.16        | 0.15      | 2.16        |

## Table S.2

List of top 25 most commonly identified EV markers from Vesiclepedia

| Gene Symbol     | NxEVs H/L | NxEVs emPAI | HxEVs H/L | HxEVs emPAI |
|-----------------|-----------|-------------|-----------|-------------|
| <b>PDCD6IP</b>  | 0.13      | 2.62        | 0.07      | 4.26        |
| <b>GAPDH</b>    | 0.26      | 12.90       | 0.14      | 172.02      |
| <b>HSPA8</b>    | 0.16      | 2.07        | 0.04      | 2.89        |
| <b>ACTB</b>     | 0.22      | 271.13      | 0.13      | 221.75      |
| <b>ANXA2</b>    | 0.15      | 120.15      | 0.16      | 463.16      |
| <b>CD9</b>      | 0.53      | 26.83       | 0.37      | 11.92       |
| <b>PKM</b>      | 0.19      | 2.93        | 0.24      | 7.30        |
| <b>HSP90AA1</b> | 0.16      | 4.18        | 0.09      | 9.48        |
| <b>ENO1</b>     | 0.24      | 19.43       | 0.23      | 136.38      |
| <b>ANXA5</b>    | 0.25      | 1.65        | 0.18      | 1.22        |
| <b>HSP90AB1</b> | 0.13      | 2.62        | 0.07      | 4.26        |
| <b>CD63</b>     | N/A       | N/A         | N/A       | N/A         |
| <b>YWHAZ</b>    | 0.23      | 25.37       | 0.21      | 5.95        |
| <b>YWHAE</b>    | 0.20      | 76.43       | 0.15      | 39.84       |
| <b>EEF1A1</b>   | 0.09      | 2.31        | 0.02      | 2.02        |
| <b>PGK1</b>     | 0.17      | 0.85        | 0.77      | 4.41        |
| <b>CLTC</b>     | 0.44      | 1.98        | 0.18      | 4.87        |
| <b>PPIA</b>     | 0.20      | 0.59        | 0.11      | 1.15        |
| <b>SDCBP</b>    | 2.38      | 128.16      | 1.57      | 17.96       |
| <b>ALDOA</b>    | 0.27      | 80.86       | 0.36      | 331.46      |
| <b>EEF2</b>     | 0.01      | 0.09        | 0.01      | 0.41        |
| <b>ALB</b>      | 0.01      | 2.94        | 0.01      | 3.64        |
| <b>TPI1</b>     | 0.18      | 28.76       | 0.27      | 36.93       |
| <b>VCP</b>      | 0.20      | 27.73       | 0.14      | 52.60       |
| <b>CFL1</b>     | 0.19      | 2.16        | 0.15      | 2.16        |
