# Supplementary material for: Microenvironmental Hypoxia Induces Dynamic Changes in Lung Cancer Synthesis and Secretion of Extracellular Vesicles
Source: Cancers (Basel). 2020 Oct 11;12(10):2917. doi: 10.3390/cancers12102917 (PMC7601203; doi:10.3390/cancers12102917)
Supplement: Supplementary file 1 [file cancers-12-02917-s001.zip › Supplementary_data_A549_cell_lysate_pSILAC.xlsx]

## Sheet: A549_Nx_pSILAC
Checked	Protein FDR Confidence	Master	Accession	Description	Exp. q-value	Sum PEP Score	Coverage	# Peptides	# PSMs	# Unique Peptides	# Protein Groups	# AAs	MW [kDa]	calc. pI	Found in Sample: [S1] F1: Light, Control	Found in Sample: [S2] F2: Light, Control	Found in Sample: [S5] F1: Heavy, Sample	Found in Sample: [S6] F2: Heavy, Sample	Modifications	Abundance Ratio: (Heavy) / (Light)	Abundances (Grouped): Light	Abundances (Grouped): Heavy	Abundances (Scaled): F1: Light, Control	Abundances (Scaled): F2: Light, Control	Abundances (Scaled): F1: Heavy, Sample	Abundances (Scaled): F2: Heavy, Sample	emPAI	# Razor Peptides	Score Sequest HT	# Peptides Sequest HT	Score Mascot	# Peptides Mascot
FALSE	Low	IsMasterProtein	A0A1B0GUH9	Ligand-dependent corepressor (Fragment) OS=Homo sapiens GN=LCOR PE=1 SV=1	0.054	0.647	1.96207	1	2	1	1	1529	167.2	7.42	Not Found	Not Found	High	Not Found		100		200			200		0.027	0	0	1	16	1
FALSE	Low	IsMasterProtein	ch17i_J3QS54	Mitogen-activated protein kinase kinase kinase 3 (Fragment) OS=Homo sapiens GN=MAP3K3 PE=1 SV=1	0.054	0.641	61.2903	1	3	1	1	31	3.4	9	High	Not Found	Not Found	Not Found	Acetyl [N-Term]	0.01	200		200				0	0			0	1
FALSE	Low	IsMasterProtein	Q96PB7	Noelin-3 OS=Homo sapiens GN=OLFM3 PE=1 SV=1	0.054	0.666	2.92887	1	2	1	1	478	54.9	8.15	Not Found	Not Found	Not Found	Not Found									0.089	0	0	1	0	1
FALSE	Low	IsMasterProtein	D6RE86	Ceruloplasmin (Fragment) OS=Homo sapiens GN=CP PE=1 SV=8	0.054	0.666	10.6742	1	4	1	1	178	20.7	7.24	Not Found	Not Found	Not Found	Not Found									0.212	0	0	1	0	1
FALSE	Low	IsMasterProtein	ch12i_Q7Z6J2	General receptor for phosphoinositides 1-associated scaffold protein OS=Homo sapiens GN=GRASP PE=1 SV=1	0.054	0.664	1.77215	1	2	1	1	395	42.6	8.84	Not Found	Not Found	High	Not Found									0.105	0	1.8	1	0	1
FALSE	Low	IsMasterProtein	K7EMT9	DNA excision repair protein ERCC-1 (Fragment) OS=Homo sapiens GN=ERCC1 PE=1 SV=1	0.054	0.663	12.0879	1	1	1	1	91	10.2	8.51	Not Found	Not Found	Not Found	Not Found	Acetyl [N-Term]								0.389	0			0	1
FALSE	Low	IsMasterProtein	H0YE51	Methionine-R-sulfoxide reductase B2, mitochondrial (Fragment) OS=Homo sapiens GN=MSRB2 PE=1 SV=1	0.054	0.661	10	1	1	1	1	120	13.3	9.22	Not Found	Not Found	Not Found	Not Found	Acetyl [N-Term]								0.292	0			14	1
FALSE	Low	IsMasterProtein	ch02u_Q8TEJ3	SH3 domain-containing RING finger protein 3 OS=Homo sapiens GN=SH3RF3 PE=1 SV=2	0.054	0.658	3.62812	1	2	1	1	882	92.7	8.84	Not Found	Not Found	Not Found	Not Found									0.051	0			0	1
FALSE	Low	IsMasterProtein	ch12u_H0YHX7	Neuron navigator 3 (Fragment) OS=Homo sapiens GN=NAV3 PE=1 SV=1	0.054	0.649	5.15021	1	1	1	1	233	24.8	10.37	Not Found	Not Found	Not Found	Not Found									0.155	0			0	1
FALSE	Low	IsMasterProtein	ch07i_Q9P0U1	Mitochondrial import receptor subunit TOM7 homolog OS=Homo sapiens GN=TOMM7 PE=1 SV=1	0.054	0.645	30.9091	1	1	1	1	55	6.2	10.29	Not Found	Not Found	Not Found	Not Found									0.778	0			37	1
FALSE	Low	IsMasterProtein	ch01u_Q5VTT5	Myomesin-3 OS=Homo sapiens GN=MYOM3 PE=2 SV=1	0.053	0.67	0.487126	1	2	1	1	1437	162.1	6.23	Not Found	Not Found	Not Found	High		100		200				200	0.028	0	1.71	1	19	1
FALSE	Low	IsMasterProtein	Q9BVK8	Transmembrane protein 147 OS=Homo sapiens GN=TMEM147 PE=1 SV=1	0.053	0.67	3.125	1	4	1	1	224	25.2	7.71	Peak Found	Peak Found	High	High		5.344	31.524	168.476	33.4	29.6	166.6	170.4	0.212	0	0	1	16	1
FALSE	Low	IsMasterProtein	O14926-2	Isoform 2 of Fascin-2 OS=Homo sapiens GN=FSCN2	0.053	0.673	5.23256	1	1	1	1	516	57.3	8.1	Not Found	Not Found	Not Found	Not Found									0.077	0			0	1
FALSE	Low	IsMasterProtein	K7ERW8	AP-3 complex subunit delta-1 (Fragment) OS=Homo sapiens GN=AP3D1 PE=1 SV=1	0.053	0.672	12.2581	1	2	1	1	155	17.1	7.9	Not Found	Not Found	Not Found	Not Found	Acetyl [N-Term]								0.292	0			0	1
FALSE	Low	IsMasterProtein	Q96JM7	Lethal(3)malignant brain tumor-like protein 3 OS=Homo sapiens GN=L3MBTL3 PE=1 SV=2	0.052	0.688	2.4359	1	1	1	1	780	88.3	6.46	Not Found	Not Found	High	Not Found		100		200			200		0.048	0	0	1
FALSE	Low	IsMasterProtein	ch03i_Q68DE3	Basic helix-loop-helix domain-containing protein USF3 OS=Homo sapiens GN=USF3 PE=1 SV=3	0.052	0.688	0.356347	1	2	1	1	2245	241.5	7.61	Not Found	High	Not Found	Not Found		0.01	200			200			0.027	0	1.71	1	0	1
FALSE	Low	IsMasterProtein	J3KTA1	F-box and leucine-rich repeat protein 20, isoform CRA_a OS=Homo sapiens GN=FBXL20 PE=1 SV=1	0.052	0.683	3.19635	1	2	1	1	438	48.5	7.5	Not Found	Not Found	Not Found	Not Found									0.083	0	0	1	0	1
FALSE	Low	IsMasterProtein	ch05u_Q8TED9	Actin filament-associated protein 1-like 1 OS=Homo sapiens GN=AFAP1L1 PE=1 SV=2	0.052	0.682	0.78125	1	1	1	1	768	86.4	6.8	Not Found	Not Found	Not Found	Not Found									0.051	0			0	1
FALSE	Low	IsMasterProtein	Q9UPT9	Ubiquitin carboxyl-terminal hydrolase 22 OS=Homo sapiens GN=USP22 PE=1 SV=2	0.052	0.682	1.33333	1	4	1	1	525	59.9	8.05	Not Found	Not Found	High	High									0.086	0	0	1	38	1
FALSE	Low	IsMasterProtein	ch16i_O95976	Immunoglobulin superfamily member 6 OS=Homo sapiens GN=IGSF6 PE=2 SV=2	0.052	0.68	9.12863	1	1	1	1	241	27	8.65	Not Found	Not Found	Not Found	Not Found									0.212	0			0	1
FALSE	Low	IsMasterProtein	ch01i_Q5T0J7	Testis-expressed sequence 35 protein OS=Homo sapiens GN=Tex35 PE=2 SV=1	0.051	0.704	5.15021	1	2	1	1	233	26.5	9.11	Not Found	Not Found	High	High		100		200			200	200	0.194	0	0	1
FALSE	Low	IsMasterProtein	Q9HB58-6	Isoform 6 of Sp110 nuclear body protein OS=Homo sapiens GN=SP110	0.051	0.697	2.38429	1	1	1	1	713	81.1	8.84	Not Found	Not Found	High	Not Found		100		200			200		0.058	0	0	1
FALSE	Low	IsMasterProtein	ch02u_Q9NRP7	Serine/threonine-protein kinase 36 OS=Homo sapiens GN=STK36 PE=1 SV=2	0.051	0.694	0.608365	1	2	1	1	1315	143.9	5.9	Peak Found	Not Found	High	Not Found		3.411	45.337	154.663	45.3		154.7		0.04	0	0	1	14	1
FALSE	Low	IsMasterProtein	ch10i_R4GMX2	DNA-directed RNA polymerase subunit (Fragment) OS=Homo sapiens GN=POLR3A PE=1 SV=1	0.051	0.695	3.01508	1	1	1	1	199	22.6	9.33	Not Found	High	Not Found	Peak Found		1.755	72.6082	127.392		72.6		127.4	0.179	0			0	1
FALSE	Low	IsMasterProtein	A2RUQ5	Uncharacterized protein C17orf102 OS=Homo sapiens GN=C17orf102 PE=2 SV=1	0.051	0.706	11.976	1	2	1	1	167	17.8	10.61	Not Found	Not Found	Not Found	Not Found									0.194	0	0	1	0	1
FALSE	Low	IsMasterProtein	Q6DN23	Phospholipase A(2) OS=Homo sapiens PE=2 SV=1	0.051	0.703	19.4444	1	3	1	1	144	16.1	9.22	Not Found	Not Found	Not Found	Not Found									0	0	0	1
FALSE	Low	IsMasterProtein	B3KXD1	cDNA FLJ45199 fis, clone BRCAN2003814, highly similar to Homo sapiens phosphatidylinositol-specific phospholipase C, X domain containing 3 (PLCXD3), mRNA OS=Homo sapiens PE=2 SV=1	0.051	0.703	3.10559	1	1	1	1	322	36.5	6.29	Not Found	Not Found	Not Found	Not Found	Acetyl [N-Term]								0.136	0			0	1
FALSE	Low	IsMasterProtein	D3DSD4	Cysteine/tyrosine-rich 1, isoform CRA_a OS=Homo sapiens GN=CYYR1 PE=4 SV=1	0.051	0.702	6.48855	1	1	1	1	262	28.1	8.85	Not Found	Not Found	Not Found	Not Found									0	0			0	1
FALSE	Low	IsMasterProtein	A7E2E5	Phosphodiesterase OS=Homo sapiens GN=PDE3B PE=2 SV=1	0.051	0.702	2.51799	1	6	1	1	1112	124.2	5.9	Not Found	Not Found	Not Found	Not Found									0	0			0	1
FALSE	Low	IsMasterProtein	A8K8V8	cDNA FLJ76444 OS=Homo sapiens PE=2 SV=1	0.051	0.702	1.6295	1	3	1	1	1166	130.4	5.58	Not Found	Not Found	Not Found	Not Found									0	0			0	1
FALSE	Low	IsMasterProtein	ch01i_Q9Y3Y2-3	Isoform 2 of Chromatin target of PRMT1 protein OS=Homo sapiens GN=CHTOP	0.051	0.701	5.22088	1	2	1	1	249	26.5	12.23	Not Found	Not Found	Not Found	Not Found									0.145	0	0	1	0	1
FALSE	Low	IsMasterProtein	B3KUF3	cDNA FLJ39738 fis, clone SMINT2016412, highly similar to Homo sapiens chloride channel, calcium activated, family member 1 (CLCA1), mRNA OS=Homo sapiens PE=2 SV=1	0.051	0.699	7.62195	1	1	1	1	328	34.9	7.8	Not Found	Not Found	Not Found	Not Found									0.145	0			0	1
FALSE	Low	IsMasterProtein	ch16u_O14874	[3-methyl-2-oxobutanoate dehydrogenase [lipoamide]] kinase, mitochondrial OS=Homo sapiens GN=BCKDK PE=1 SV=2	0.051	0.694	5.09709	1	1	1	1	412	46.3	8.82	Not Found	Not Found	Not Found	Not Found									0.105	0			0	1
FALSE	Low	IsMasterProtein	O00716	Transcription factor E2F3 OS=Homo sapiens GN=E2F3 PE=1 SV=1	0.051	0.693	5.16129	1	1	1	1	465	49.1	5.44	Not Found	Not Found	Not Found	Not Found									0.129	0			0	1
FALSE	High	IsMasterProtein	ch17u_K7ES11	(E3-independent) E2 ubiquitin-conjugating enzyme (Fragment) OS=Homo sapiens GN=UBE2O PE=1 SV=1	0	119.241	24.4114	11	72	1	1	807	88.8	5.03	High	High	High	High		0.292	154.839	45.1609	154.8		45.2		1.434	0	86.24	11	1276	11
FALSE	High	IsMasterProtein	ch17i_Q9C0C9	(E3-independent) E2 ubiquitin-conjugating enzyme OS=Homo sapiens GN=UBE2O PE=1 SV=3	0	204.691	20.8978	16	108	6	1	1292	141.2	5.12	High	High	High	High		1.988	66.9331	133.067	68.1	65.8	131.9	134.2	1.444	13	143.2	16	2378	16
FALSE	High	IsMasterProtein	O94851	[F-actin]-methionine sulfoxide oxidase MICAL2 OS=Homo sapiens GN=MICAL2 PE=1 SV=1	0	32.128	6.9395	7	24	6	1	1124	126.6	8.65	High	High	High	High		2.307	60.4808	139.519	62.3	58.6	137.7	141.4	0.287	1	21.47	7	306	7
FALSE	Medium	IsMasterProtein	ch13u_A0A0U1RQK4	[Protein ADP-ribosylarginine] hydrolase-like protein 1 OS=Homo sapiens GN=ADPRHL1 PE=1 SV=1	0.021	1.263	0.965938	1	4	1	1	1967	211.7	8.4	Not Found	Not Found	Not Found	Not Found									0.021	0			0	1
FALSE	High	IsMasterProtein	ch20u_Q07973	1,25-dihydroxyvitamin D(3) 24-hydroxylase, mitochondrial OS=Homo sapiens GN=CYP24A1 PE=1 SV=2	0	47.962	20.428	8	30	8	1	514	58.8	8.75	Peak Found	High	High	High		9.267	19.4802	180.52	19.7	19.2	180.3	180.8	0.911	0	37.53	8	404	8
FALSE	High	IsMasterProtein	ch02u_Q9BV57	1,2-dihydroxy-3-keto-5-methylthiopentene dioxygenase OS=Homo sapiens GN=ADI1 PE=1 SV=1	0	39.946	57.5419	7	26	7	1	179	21.5	5.68	Peak Found	Peak Found	High	High		4.762	34.7089	165.291	34.7	34.7	165.3	165.3	3.125	0	27.56	6	351	7
FALSE	High	IsMasterProtein	ch02i_P61604	10 kDa heat shock protein, mitochondrial OS=Homo sapiens GN=HSPE1 PE=1 SV=2	0	55.121	43.1373	5	146	2	1	102	10.9	8.92	High	High	High	High		1.174	91.9865	108.014	83.2	100.8	116.8	99.2	18.953	0	162.09	5	2871	5
FALSE	High	IsMasterProtein	ch17u_Q15029	116 kDa U5 small nuclear ribonucleoprotein component OS=Homo sapiens GN=EFTUD2 PE=1 SV=1	0	535.584	44.2387	30	296	30	1	972	109.4	5	High	High	High	High		1.961	67.5429	132.457	67.5	67.6	132.5	132.4	14.973	0	403.63	30	7112	29
FALSE	High	IsMasterProtein	ch09i_Q9NRX4	14 kDa phosphohistidine phosphatase OS=Homo sapiens GN=PHPT1 PE=1 SV=1	0	64.334	36.8	3	39	3	1	125	13.8	6.07	High	High	High	High	Acetyl [N-Term]	1.226	89.8537	110.146	89.1	90.6	110.9	109.4	11.915	0	28.11	2	1301	3
FALSE	High	IsMasterProtein	P62258	14-3-3 protein epsilon OS=Homo sapiens GN=YWHAE PE=1 SV=1	0	257.835	54.5098	13	406	11	1	255	29.2	4.74	High	High	High	High	Acetyl [N-Term]	1.312	86.4882	113.512	94.1	78.8	105.9	121.2	315.228	0	539.49	12	10021	13
FALSE	High	IsMasterProtein	P31947	14-3-3 protein sigma OS=Homo sapiens GN=SFN PE=1 SV=1	0	152.275	44.7581	9	111	7	1	248	27.8	4.74	High	High	High	High		0.944	102.871	97.1288	103.1	102.6	96.9	97.4	17.957	0	145.95	9	2239	9
FALSE	High	IsMasterProtein	ch02u_P27348	14-3-3 protein theta OS=Homo sapiens GN=YWHAQ PE=1 SV=1	0	378.36	52.6531	14	440	12	1	245	27.7	4.78	High	High	High	High		1.3	86.9667	113.033	87.2	86.8	112.8	113.2	315.228	5	579.28	14	10917	14
FALSE	High	IsMasterProtein	ch08u_P63104	14-3-3 protein zeta/delta OS=Homo sapiens GN=YWHAZ PE=1 SV=1	0	258.794	55.102	12	444	10	1	245	27.7	4.79	High	High	High	High		1.138	93.5577	106.442	93.4	93.7	106.6	106.3	87.587	0	588.44	12	11866	12
FALSE	High	IsMasterProtein	ch01i_A0A0B4J1S4	15 kDa selenoprotein OS=Homo sapiens GN=SEP15 PE=1 SV=1	0	26.931	35.1515	3	13	3	1	165	18	5.03	High	High	High	High		1.344	85.3175	114.682	79.5	91.1	120.5	108.9	1.783	0	14.16	3	397	3
FALSE	High	IsMasterProtein	ch04i_P15428	15-hydroxyprostaglandin dehydrogenase [NAD(+)] OS=Homo sapiens GN=HPGD PE=1 SV=1	0	60.459	28.5714	5	32	5	1	266	29	5.86	High	High	High	High		2.316	60.3096	139.69	60.6	60	139.4	140	2.162	0	45.05	5	735	5
FALSE	High	IsMasterProtein	ch11i_Q9C0C2	182 kDa tankyrase-1-binding protein OS=Homo sapiens GN=TNKS1BP1 PE=1 SV=4	0	390.789	24.1758	28	180	28	1	1729	181.7	4.86	High	High	High	High		1.764	72.3508	127.649	72.4	72.3	127.6	127.7	2.624	0	261.62	28	4534	28
FALSE	High	IsMasterProtein	Q9NUQ2	1-acyl-sn-glycerol-3-phosphate acyltransferase epsilon OS=Homo sapiens GN=AGPAT5 PE=1 SV=3	0	17.611	4.3956	1	7	1	1	364	42	9.1	High	High	High	High		1.077	96.3047	103.695	90.2	102.4	109.8	97.6	0.233	0	12.59	1	196	1
FALSE	High	IsMasterProtein	Q8WUW2	1-acyl-sn-glycerol-3-phosphate acyltransferase OS=Homo sapiens GN=AGPAT2 PE=2 SV=1	0.005	2.693	3.94265	1	2	1	1	279	31	9.01	Not Found	High	Not Found	Peak Found		1.415	82.8098	117.19		82.8		117.2	0.166	0	1.78	1	0	1
FALSE	High	IsMasterProtein	Q96QU6	1-aminocyclopropane-1-carboxylate synthase-like protein 1 OS=Homo sapiens GN=ACCS PE=1 SV=1	0	6.579	3.79242	1	8	1	1	501	57.3	6.43	High	High	High	High		2.213	62.24	137.76	57.3	67.2	142.7	132.8	0.155	0	2.02	1	52	1
FALSE	High	IsMasterProtein	ch02i_Q9Y2I7	1-phosphatidylinositol 3-phosphate 5-kinase OS=Homo sapiens GN=PIKFYVE PE=1 SV=3	0	12.217	2.33556	3	10	3	1	2098	237	6.7	High	High	High	High		2.67	54.4926	145.507	54.8	54.2	145.2	145.8	0.055	0	8.4	3	108	3
FALSE	High	IsMasterProtein	Q01970	1-phosphatidylinositol 4,5-bisphosphate phosphodiesterase beta-3 OS=Homo sapiens GN=PLCB3 PE=1 SV=2	0	113.679	12.7229	10	54	10	1	1234	138.7	5.9	High	High	High	High		1.587	77.3021	122.698	78.7	75.9	121.3	124.1	0.688	0	75.78	10	1481	10
FALSE	High	IsMasterProtein	ch17u_Q8N3E9	1-phosphatidylinositol 4,5-bisphosphate phosphodiesterase delta-3 OS=Homo sapiens GN=PLCD3 PE=1 SV=3	0	30.601	8.74525	4	14	4	1	789	89.2	6.98	High	High	High	High		2.394	58.935	141.065	49.9	68	150.1	132	0.266	0	19.49	4	279	4
FALSE	High	IsMasterProtein	ch10u_Q9P212	1-phosphatidylinositol 4,5-bisphosphate phosphodiesterase epsilon-1 OS=Homo sapiens GN=PLCE1 PE=1 SV=3	0.001	4.199	0.738488	1	2	1	1	2302	258.6	6.48	Not Found	Not Found	High	Not Found		100		200			200		0.019	0	0	1	49	1
FALSE	High	IsMasterProtein	ch16u_P16885	1-phosphatidylinositol 4,5-bisphosphate phosphodiesterase gamma-2 OS=Homo sapiens GN=PLCG2 PE=1 SV=4	0	5.573	1.18577	1	2	1	1	1265	147.8	6.64	Not Found	Not Found	High	Not Found									0.032	0	1.9	1	47	1
FALSE	Medium	IsMasterProtein	ch12u_H0YFH9	1-phosphatidylinositol 4,5-bisphosphate phosphodiesterase zeta-1 (Fragment) OS=Homo sapiens GN=PLCZ1 PE=1 SV=1	0.049	0.724	17.8218	1	2	1	1	101	11.4	9.82	High	High	Not Found	Peak Found	Acetyl [N-Term]	0.133	187.492	25.0162	200	175		25	0.389	0			0	1
FALSE	High	IsMasterProtein	P09543	2',3'-cyclic-nucleotide 3'-phosphodiesterase OS=Homo sapiens GN=CNP PE=1 SV=2	0	132.732	26.3658	11	74	11	1	421	47.5	9.07	High	High	High	High		1.592	77.1501	122.85	77.8	76.5	122.2	123.5	3.217	0	107.7	11	1466	11
FALSE	High	IsMasterProtein	ch08u_Q16698	2,4-dienoyl-CoA reductase, mitochondrial OS=Homo sapiens GN=DECR1 PE=1 SV=1	0	64.169	23.8806	6	38	6	1	335	36	9.28	High	High	High	High		1.157	92.7308	107.269	91.6	93.8	108.4	106.2	2.162	0	45.85	6	654	6
FALSE	High	IsMasterProtein	ch03i_Q6L8Q7	2',5'-phosphodiesterase 12 OS=Homo sapiens GN=PDE12 PE=1 SV=2	0	75.018	19.8686	6	26	6	1	609	67.3	6.57	High	High	High	High		2.036	65.8808	134.119	63.6	68.2	136.4	131.8	1.154	0	27.64	6	642	6
FALSE	High	IsMasterProtein	Q3ZM02	2'-5' oligoadenylate synthetase 1 p52 isoform OS=Homo sapiens GN=OAS1 PE=2 SV=1	0	11.58	5.66449	2	6	2	1	459	52.1	9.09	Peak Found	Not Found	High	High		3.131	55.0853	172.457	55.1		144.9	200	0.202	0	7.08	2	175	2
FALSE	High	IsMasterProtein	A0A024RBQ5	2'-5'-oligoadenylate synthetase 3, 100kDa, isoform CRA_a OS=Homo sapiens GN=OAS3 PE=4 SV=1	0	57.697	8.73965	8	54	8	1	1087	121.1	8.35	High	High	High	High		1.259	88.5384	111.462	88.1	88.9	111.9	111.1	1.099	0	41.25	8	241	8
FALSE	High	IsMasterProtein	ch14u_A0A087X2I1	26S protease regulatory subunit 10B OS=Homo sapiens GN=PSMC6 PE=1 SV=1	0	90.585	27.7916	10	83	10	1	403	45.8	7.78	High	High	High	High		1.221	90.0416	109.958	90.1	90	109.9	110	4.298	0	88.29	10	1164	10
FALSE	High	IsMasterProtein	ch11u_R4GNH3	26S protease regulatory subunit 6A OS=Homo sapiens GN=PSMC3 PE=1 SV=1	0	196.733	40.4255	13	129	13	1	423	47.3	5.22	High	High	High	High	Acetyl [N-Term]	1.295	87.139	112.861	87.4	86.9	112.6	113.1	13.251	0	151.97	12	2333	13
FALSE	High	IsMasterProtein	ch19i_P43686	26S protease regulatory subunit 6B OS=Homo sapiens GN=PSMC4 PE=1 SV=2	0	222.908	48.3254	14	145	14	1	418	47.3	5.21	High	High	High	High		1.513	79.5749	120.425	79.8	79.3	120.2	120.7	21.909	0	177.41	14	2491	14
FALSE	High	IsMasterProtein	ch17u_P62195	26S protease regulatory subunit 8 OS=Homo sapiens GN=PSMC5 PE=1 SV=1	0	253.105	49.5074	18	152	17	1	406	45.6	7.55	High	High	High	High	Acetyl [N-Term]	1.39	83.6966	116.303	83.5	83.9	116.5	116.1	25.827	2	204.4	17	2437	18
FALSE	High	IsMasterProtein	A0A087WW66	26S proteasome non-ATPase regulatory subunit 1 OS=Homo sapiens GN=PSMD1 PE=1 SV=1	0	283.142	31.6894	22	185	1	1	953	105.8	5.41	High	High	Peak Found	Not Found	Acetyl [N-Term]	1.225	89.9047	110.095	91.1	88.7	108.9	111.3	5.861	27	243.25	22	3244	22
FALSE	High	IsMasterProtein	chXu_O75832	26S proteasome non-ATPase regulatory subunit 10 OS=Homo sapiens GN=PSMD10 PE=1 SV=1	0	167.07	30.0885	5	73	5	1	226	24.4	6.1	High	High	High	High		1.703	73.9881	126.012	74.4	73.6	125.6	126.4	23.245	0	118.66	5	1957	5
FALSE	High	IsMasterProtein	O00231	26S proteasome non-ATPase regulatory subunit 11 OS=Homo sapiens GN=PSMD11 PE=1 SV=3	0	223.098	45.4976	15	211	15	1	422	47.4	6.48	High	High	High	High	Acetyl [N-Term]	1.464	81.1813	118.819	83.4	79	116.6	121	14.399	0	252.72	14	4045	15
FALSE	High	IsMasterProtein	ch17i_O00232	26S proteasome non-ATPase regulatory subunit 12 OS=Homo sapiens GN=PSMD12 PE=1 SV=3	0	157.183	20.614	10	90	10	1	456	52.9	7.65	High	High	High	High		1.106	94.9567	105.043	94.8	95.1	105.2	104.9	3.437	0	126.22	10	2271	10
FALSE	High	IsMasterProtein	ch02i_O00487	26S proteasome non-ATPase regulatory subunit 14 OS=Homo sapiens GN=PSMD14 PE=1 SV=1	0	114.087	36.129	6	48	6	1	310	34.6	6.52	High	High	High	High		1.119	94.3889	105.611	93.7	95.1	106.3	104.9	7.799	0	55.92	6	866	6
FALSE	High	IsMasterProtein	P55036	26S proteasome non-ATPase regulatory subunit 4 OS=Homo sapiens GN=PSMD4 PE=1 SV=1	0	226.562	33.1565	10	123	2	1	377	40.7	4.79	High	High	High	High		2.303	60.5517	139.448	61.7	59.4	138.3	140.6	47.697	0	191.42	10	3224	10
FALSE	High	IsMasterProtein	ch01u_Q5VWC4	26S proteasome non-ATPase regulatory subunit 4 OS=Homo sapiens GN=PSMD4 PE=1 SV=1	0	183.512	33.6842	11	104	3	1	380	41.1	4.81	Not Found	Peak Found	High	High		1.952	67.7522	132.248	67.7	67.8	132.3	132.2	24.809	15	142.71	11	2534	11
FALSE	High	IsMasterProtein	Q15008	26S proteasome non-ATPase regulatory subunit 6 OS=Homo sapiens GN=PSMD6 PE=1 SV=1	0	197.062	45.2442	17	142	17	1	389	45.5	5.62	High	High	High	High		1.189	91.3867	108.613	88.2	94.6	111.8	105.4	19.434	0	170.37	15	1890	17
FALSE	High	IsMasterProtein	ch19i_R4GMR5	26S proteasome non-ATPase regulatory subunit 8 OS=Homo sapiens GN=PSMD8 PE=1 SV=1	0	59.892	44.9477	8	42	8	1	287	32.5	7.31	High	High	High	High	Acetyl [N-Term]	1.347	85.2082	114.792	85.2	85.2	114.8	114.8	2.728	0	31.88	7	494	8
FALSE	High	IsMasterProtein	ch12u_O00233	26S proteasome non-ATPase regulatory subunit 9 OS=Homo sapiens GN=PSMD9 PE=1 SV=3	0	22.075	17.0404	3	20	3	1	223	24.7	6.95	High	High	High	High		1.434	82.1635	117.836	82.7	81.6	117.3	118.4	1.31	0	27.26	3	358	3
FALSE	High	IsMasterProtein	ch07i_Q13442	28 kDa heat- and acid-stable phosphoprotein OS=Homo sapiens GN=PDAP1 PE=1 SV=1	0	62.879	22.0994	4	42	4	1	181	20.6	8.87	High	High	High	High		1.491	80.295	119.705	81.3	79.3	118.7	120.7	6.943	0	65.4	4	1260	4
FALSE	High	IsMasterProtein	ch15i_P82912	28S ribosomal protein S11, mitochondrial OS=Homo sapiens GN=MRPS11 PE=1 SV=2	0	33.409	21.6495	4	26	4	1	194	20.6	10.81	High	High	High	High		0.401	142.71	57.2899	160.7	124.8	39.3	75.2	3.329	0	25.1	4	314	4
FALSE	High	IsMasterProtein	ch19i_O15235	28S ribosomal protein S12, mitochondrial OS=Homo sapiens GN=MRPS12 PE=1 SV=1	0	19.202	18.1159	1	8	1	1	138	15.2	10.29	Peak Found	Peak Found	High	High		1.788	71.7485	128.252	70.3	73.2	129.7	126.8	0.778	0	15.5	1	240	1
FALSE	High	IsMasterProtein	ch01u_P82914	28S ribosomal protein S15, mitochondrial OS=Homo sapiens GN=MRPS15 PE=1 SV=1	0	5.321	8.17121	2	8	2	1	257	29.8	10.48	High	Peak Found	High	High		1	100.012	99.9878	111.9	88.1	88.1	111.9	0.274	0	8.43	2	68	2
FALSE	High	IsMasterProtein	Q9Y3D3	28S ribosomal protein S16, mitochondrial OS=Homo sapiens GN=MRPS16 PE=1 SV=1	0	38.787	24.0876	2	18	2	1	137	15.3	9.5	High	High	High	High		1.044	97.8396	102.16	97.5	98.2	102.5	101.8	2.162	0	27.27	2	474	2
FALSE	High	IsMasterProtein	ch06i_Q9Y676	28S ribosomal protein S18b, mitochondrial OS=Homo sapiens GN=MRPS18B PE=1 SV=1	0	17.792	20.9302	3	12	3	1	258	29.4	9.38	High	High	High	High		1.5	79.9997	120	77.4	82.6	122.6	117.4	0.585	0	19.4	3	259	3
FALSE	High	IsMasterProtein	ch01u_A0A075B746	28S ribosomal protein S21, mitochondrial OS=Homo sapiens GN=MRPS21 PE=1 SV=1	0	6.143	13.7931	1	4	1	1	87	10.7	9.92	High	High	Peak Found	Peak Found		2.199	62.5206	137.479	61.9	63.1	138.1	136.9	0.468	0	4.23	1	88	1
FALSE	High	IsMasterProtein	ch03i_P82650	28S ribosomal protein S22, mitochondrial OS=Homo sapiens GN=MRPS22 PE=1 SV=1	0	98.367	33.0556	9	54	9	1	360	41.3	7.9	High	High	High	High		0.936	103.323	96.6768	99.3	107.3	100.7	92.7	3.786	0	70.87	9	761	9
FALSE	High	IsMasterProtein	Q9Y3D9	28S ribosomal protein S23, mitochondrial OS=Homo sapiens GN=MRPS23 PE=1 SV=2	0	53.458	41.0526	6	34	6	1	190	21.8	8.9	High	High	High	High		1.72	73.5333	126.467	76.6	70.5	123.4	129.5	6.017	0	37.6	6	365	6
FALSE	High	IsMasterProtein	ch07i_Q96EL2	28S ribosomal protein S24, mitochondrial OS=Homo sapiens GN=MRPS24 PE=1 SV=1	0	20.28	16.1677	2	12	2	1	167	19	9.38	High	High	High	High		2.76	53.1963	146.804	51.2	55.2	148.8	144.8	0.778	0	14.08	2	185	2
FALSE	High	IsMasterProtein	ch03u_P82663	28S ribosomal protein S25, mitochondrial OS=Homo sapiens GN=MRPS25 PE=1 SV=1	0	20.783	19.0751	2	10	2	1	173	20.1	8.82	High	High	High	High		1.032	98.4183	101.582	94.8	102	105.2	98	0.874	0	13.88	2	220	2
FALSE	High	IsMasterProtein	ch20i_Q9BYN8	28S ribosomal protein S26, mitochondrial OS=Homo sapiens GN=MRPS26 PE=1 SV=1	0	12.837	5.85366	2	12	2	1	205	24.2	10.39	High	High	Peak Found	High		1.373	84.2904	115.71	87.2	81.4	112.8	118.6	0.585	0	17.32	2	140	2
FALSE	High	IsMasterProtein	ch01i_V9GYA7	28S ribosomal protein S29, mitochondrial (Fragment) OS=Homo sapiens GN=DAP3 PE=1 SV=1	0	68.586	40.9524	7	47	1	1	210	23.5	7.9	High	Not Found	Peak Found	Not Found									7.254	0	51.75	6	1004	7
FALSE	High	IsMasterProtein	P51398	28S ribosomal protein S29, mitochondrial OS=Homo sapiens GN=DAP3 PE=1 SV=1	0	112.769	31.9095	10	73	4	1	398	45.5	8.88	High	High	High	High		1.368	84.4437	115.556	79.7	89.2	120.3	110.8	4.623	6	87.57	10	1520	10
FALSE	High	IsMasterProtein	ch05u_Q9NP92	28S ribosomal protein S30, mitochondrial OS=Homo sapiens GN=MRPS30 PE=1 SV=2	0	62.047	22.779	5	34	5	1	439	50.3	7.97	High	High	High	High		1.203	90.7794	109.221	88.9	92.6	111.1	107.4	1.683	0	47.3	5	434	5
FALSE	High	IsMasterProtein	Q92665	28S ribosomal protein S31, mitochondrial OS=Homo sapiens GN=MRPS31 PE=1 SV=3	0	139.837	27.5949	8	54	8	1	395	45.3	9.29	High	High	High	High		0.994	100.297	99.7025	100.5	100.1	99.5	99.9	3.262	0	75.94	8	1837	8
FALSE	High	IsMasterProtein	C9JJ19	28S ribosomal protein S34, mitochondrial OS=Homo sapiens GN=MRPS34 PE=1 SV=2	0	35.844	23.5556	3	22	3	1	225	26.3	9.89	High	High	High	High		1.236	89.4354	110.565	89.5	89.4	110.5	110.6	1.054	0	25.08	3	352	3
FALSE	High	IsMasterProtein	P82673	28S ribosomal protein S35, mitochondrial OS=Homo sapiens GN=MRPS35 PE=1 SV=1	0	90.175	16.4087	4	30	4	1	323	36.8	8.24	High	High	High	High		1.567	77.9183	122.082	77.7	78.1	122.3	121.9	1.994	0	47.08	4	1013	4
FALSE	High	IsMasterProtein	P82909	28S ribosomal protein S36, mitochondrial OS=Homo sapiens GN=MRPS36 PE=1 SV=2	0	33.789	24.2718	2	18	2	1	103	11.5	9.99	High	High	High	High		1.536	78.8593	121.141	73.5	84.2	126.5	115.8	9	0	18.32	2	234	2
FALSE	High	IsMasterProtein	ch02u_P82675	28S ribosomal protein S5, mitochondrial OS=Homo sapiens GN=MRPS5 PE=1 SV=2	0	51.7	19.7674	6	38	6	1	430	48	9.92	High	High	High	High		1.074	96.4243	103.576	97.5	95.3	102.5	104.7	1.346	0	37.88	6	562	6
FALSE	High	IsMasterProtein	P82932	28S ribosomal protein S6, mitochondrial OS=Homo sapiens GN=MRPS6 PE=1 SV=3	0	11.838	10.4	1	8	1	1	125	14.2	9.26	High	High	High	High		1.819	70.9419	129.058	68.9	73	131.1	127	0.668	0	8.68	1	89	1
FALSE	High	IsMasterProtein	ch17i_J3QLS3	28S ribosomal protein S7, mitochondrial OS=Homo sapiens GN=MRPS7 PE=1 SV=1	0	66.341	24.3542	6	48	6	1	271	31.7	9.86	High	High	High	High		1.89	69.2156	130.784	68.8	69.7	131.2	130.3	3.281	0	60.21	6	510	6
FALSE	High	IsMasterProtein	ch02i_P82933	28S ribosomal protein S9, mitochondrial OS=Homo sapiens GN=MRPS9 PE=1 SV=2	0	34.49	12.1212	4	26	4	1	396	45.8	9.51	High	High	High	High		0.83	109.269	90.731	110.4	108.1	89.6	91.9	0.743	0	34.22	4	495	4
FALSE	High	IsMasterProtein	ch06u_H0Y8X4	2'-deoxynucleoside 5'-phosphate N-hydrolase 1 (Fragment) OS=Homo sapiens GN=DNPH1 PE=1 SV=1	0	65.204	21.8107	4	26	4	1	243	25.9	5.5	High	High	High	High		0.802	110.992	89.0083	84.6	137.4	115.4	62.6	2.162	0	38.31	4	701	4
FALSE	High	IsMasterProtein	ch03i_Q9UJ83	2-hydroxyacyl-CoA lyase 1 OS=Homo sapiens GN=HACL1 PE=1 SV=2	0	9.251	2.07612	1	8	1	1	578	63.7	7.36	High	High	High	High		1.621	76.2974	123.703	73.2	79.4	126.8	120.6	0.166	0	4.97	1	55	1
FALSE	High	IsMasterProtein	ch12i_Q5HYK3	2-methoxy-6-polyprenyl-1,4-benzoquinol methylase, mitochondrial OS=Homo sapiens GN=COQ5 PE=1 SV=2	0	21.697	7.95107	2	16	2	1	327	37.1	6.95	Peak Found	Peak Found	High	High		6.962	25.1192	174.881	27.3	22.9	172.7	177.1	0.468	0	19.43	2	290	2
FALSE	High	IsMasterProtein	ch12u_Q6N063	2-oxoglutarate and iron-dependent oxygenase domain-containing protein 2 OS=Homo sapiens GN=OGFOD2 PE=2 SV=2	0.001	4.691	4.57143	1	2	1	1	350	39	5.68	Not Found	Peak Found	Not Found	High		3.069	49.1544	150.846		49.2		150.8	0.122	0	2.36	1	32	1
FALSE	High	IsMasterProtein	ch07u_Q02218	2-oxoglutarate dehydrogenase, mitochondrial OS=Homo sapiens GN=OGDH PE=1 SV=3	0	148.418	22.6784	16	77	16	1	1023	115.9	6.86	High	High	High	High		1.084	95.9721	104.028	95.6	96.4	104.4	103.6	1.783	0	90.01	16	1467	16
FALSE	High	IsMasterProtein	ch08u_Q8IV48	3'-5' exoribonuclease 1 OS=Homo sapiens GN=ERI1 PE=1 SV=3	0	14.189	4.29799	1	6	1	1	349	40	6.7	Peak Found	High	High	High		2.975	50.3095	149.691	49.7	50.9	150.3	149.1	0.359	0	8.03	1	170	1
FALSE	High	IsMasterProtein	ch04u_Q9BYD6	39S ribosomal protein L1, mitochondrial OS=Homo sapiens GN=MRPL1 PE=1 SV=2	0	84.585	28.3077	6	48	6	1	325	36.9	8.78	High	High	High	High		1.109	94.8273	105.173	94.5	95.1	105.5	104.9	4.179	0	57.63	6	817	6
FALSE	High	IsMasterProtein	ch11u_Q9Y3B7	39S ribosomal protein L11, mitochondrial OS=Homo sapiens GN=MRPL11 PE=1 SV=1	0	41.118	24.4792	4	26	4	1	192	20.7	9.91	High	High	High	High		1.167	92.3056	107.694	94.7	89.9	105.3	110.1	2.728	0	28.18	4	487	4
FALSE	High	IsMasterProtein	ch08u_Q9BYD1	39S ribosomal protein L13, mitochondrial OS=Homo sapiens GN=MRPL13 PE=1 SV=1	0	46.326	21.3483	4	30	4	1	178	20.7	9.16	High	High	High	High		1.371	84.3456	115.654	92.2	76.5	107.8	123.5	2.981	0	37.46	4	366	3
FALSE	High	IsMasterProtein	ch06u_Q6P1L8	39S ribosomal protein L14, mitochondrial OS=Homo sapiens GN=MRPL14 PE=1 SV=1	0	38.041	29.6552	3	21	3	1	145	15.9	10.24	High	High	High	High		1.372	84.3292	115.671	85.2	83.5	114.8	116.5	2.981	0	21.38	3	502	3
FALSE	High	IsMasterProtein	Q9NX20	39S ribosomal protein L16, mitochondrial OS=Homo sapiens GN=MRPL16 PE=1 SV=1	0	52.757	25.498	5	30	5	1	251	28.4	10.13	High	High	High	High		1.412	82.9022	117.098	82.6	83.2	117.4	116.8	3.642	0	31.5	5	319	5
FALSE	High	IsMasterProtein	Q9NRX2	39S ribosomal protein L17, mitochondrial OS=Homo sapiens GN=MRPL17 PE=1 SV=1	0	6.636	8.57143	2	8	2	1	175	20	10.11	Peak Found	High	High	High		1.441	81.9489	118.051	80.3	83.6	119.7	116.4	0.638	0	5.52	2	34	2
FALSE	High	IsMasterProtein	ch06i_Q9H0U6	39S ribosomal protein L18, mitochondrial OS=Homo sapiens GN=MRPL18 PE=1 SV=1	0.002	3.12	5	1	4	1	1	180	20.6	9.54	Peak Found	Peak Found	High	High		1.243	89.1609	110.839	90.3	88	109.7	112	0.259	0	4.08	1	0	1
FALSE	High	IsMasterProtein	P49406	39S ribosomal protein L19, mitochondrial OS=Homo sapiens GN=MRPL19 PE=1 SV=2	0	15.461	9.24658	3	18	3	1	292	33.5	9.5	High	High	High	High		1.404	83.202	116.798	83.6	82.8	116.4	117.2	0.65	0	16.04	3	178	2
FALSE	High	IsMasterProtein	ch06u_Q5T653	39S ribosomal protein L2, mitochondrial OS=Homo sapiens GN=MRPL2 PE=1 SV=2	0	32.375	12.1311	2	12	2	1	305	33.3	11.3	High	High	High	High		1.152	92.9539	107.046	92.5	93.4	107.5	106.6	0.624	0	21.75	2	318	2
FALSE	High	IsMasterProtein	Q9BYC9	39S ribosomal protein L20, mitochondrial OS=Homo sapiens GN=MRPL20 PE=1 SV=1	0	29.484	20.8054	2	12	2	1	149	17.4	10.86	High	High	High	High		1.221	90.0506	109.949	90.5	89.6	109.5	110.4	1.512	0	18.74	2	195	2
FALSE	High	IsMasterProtein	ch05u_J3KQY1	39S ribosomal protein L22, mitochondrial OS=Homo sapiens GN=MRPL22 PE=1 SV=1	0	24.472	15.9483	3	28	3	1	232	26.5	9.74	High	High	High	High		1.311	86.5529	113.447	86.5	86.6	113.5	113.4	1.254	0	27.92	3	401	3
FALSE	High	IsMasterProtein	ch11i_A8MYK1	39S ribosomal protein L23, mitochondrial OS=Homo sapiens GN=MRPL23 PE=1 SV=1	0.008	2.293	4.18848	1	4	1	1	191	21.8	11.62	Peak Found	Peak Found	High	High		1.298	87.0472	112.953	89.6	84.5	110.4	115.5	0.194	0	3.8	1	31	1
FALSE	High	IsMasterProtein	ch01u_Q96A35	39S ribosomal protein L24, mitochondrial OS=Homo sapiens GN=MRPL24 PE=1 SV=1	0	16.803	10.6481	2	16	2	1	216	24.9	9.29	High	High	High	High		0.995	100.264	99.7359	101	99.5	99	100.5	0.778	0	9.61	2	177	2
FALSE	High	IsMasterProtein	Q9P0M9	39S ribosomal protein L27, mitochondrial OS=Homo sapiens GN=MRPL27 PE=1 SV=1	0	17.988	10.1351	1	10	1	1	148	16.1	10.42	High	High	High	High		1.201	90.8862	109.114	92	89.8	108	110.2	0.995	0	14.77	1	123	1
FALSE	High	IsMasterProtein	ch16u_Q13084	39S ribosomal protein L28, mitochondrial OS=Homo sapiens GN=MRPL28 PE=1 SV=4	0	19.386	20.3125	3	14	3	1	256	30.1	8.29	High	High	High	High		1.304	86.8033	113.197	87.3	86.3	112.7	113.7	0.668	0	18.6	3	154	3
FALSE	Medium	IsMasterProtein	ch07i_H7BZU9	39S ribosomal protein L32, mitochondrial (Fragment) OS=Homo sapiens GN=MRPL32 PE=4 SV=1	0.031	0.88	40.4762	1	1	1	1	42	5	10.9	Not Found	Not Found	Not Found	Not Found	Acetyl [N-Term]								2.162	0			0	1
FALSE	High	IsMasterProtein	ch07u_Q9BYC8	39S ribosomal protein L32, mitochondrial OS=Homo sapiens GN=MRPL32 PE=1 SV=1	0	57.088	20.2128	3	29	3	1	188	21.4	9.73	High	High	High	High		1.262	88.4368	111.563	87.7	89.2	112.3	110.8	5.31	0	50.37	3	532	3
FALSE	High	IsMasterProtein	O75394	39S ribosomal protein L33, mitochondrial OS=Homo sapiens GN=MRPL33 PE=1 SV=1	0	8.844	16.9231	1	8	1	1	65	7.6	10.8	High	High	High	High		3.672	42.8108	157.189	41.5	44.1	158.5	155.9	2.162	0	10.14	1	72	1
FALSE	High	IsMasterProtein	Q9NZE8	39S ribosomal protein L35, mitochondrial OS=Homo sapiens GN=MRPL35 PE=1 SV=3	0.002	3.211	5.31915	1	4	1	1	188	21.5	11.3	Peak Found	Peak Found	High	High		1.2	90.8922	109.108	86.6	95.2	113.4	104.8	0.212	0	4.3	1	42	1
FALSE	High	IsMasterProtein	ch01i_Q9BZE1	39S ribosomal protein L37, mitochondrial OS=Homo sapiens GN=MRPL37 PE=1 SV=2	0	107.623	30.0236	9	64	9	1	423	48.1	8.59	High	High	High	High		1.112	94.7092	105.291	94.3	95.1	105.7	104.9	2.398	0	77.29	9	1314	9
FALSE	High	IsMasterProtein	Q96DV4	39S ribosomal protein L38, mitochondrial OS=Homo sapiens GN=MRPL38 PE=1 SV=2	0	60.939	16.5789	5	26	5	1	380	44.6	7.53	High	High	High	High		1.16	92.5965	107.403	92	93.2	108	106.8	1.228	0	42.14	5	577	5
FALSE	High	IsMasterProtein	ch22i_Q9NQ50	39S ribosomal protein L40, mitochondrial OS=Homo sapiens GN=MRPL40 PE=1 SV=1	0	30.087	23.7864	3	18	3	1	206	24.5	9.63	High	High	High	High		1.301	86.9032	113.097	89.3	84.6	110.7	115.4	1.848	0	29.96	3	173	3
FALSE	High	IsMasterProtein	Q8IXM3	39S ribosomal protein L41, mitochondrial OS=Homo sapiens GN=MRPL41 PE=1 SV=1	0	35.078	45.2555	4	26	4	1	137	15.4	9.57	High	High	High	High		1.187	91.4472	108.553	91	91.9	109	108.1	4.179	0	34.23	4	504	4
FALSE	High	IsMasterProtein	Q9H2W6	39S ribosomal protein L46, mitochondrial OS=Homo sapiens GN=MRPL46 PE=1 SV=1	0	52.369	24.0143	6	40	6	1	279	31.7	7.05	High	High	High	High		1.086	95.8817	104.118	98.8	92.9	101.2	107.1	2.793	0	48.33	6	625	6
FALSE	High	IsMasterProtein	Q9HD33	39S ribosomal protein L47, mitochondrial OS=Homo sapiens GN=MRPL47 PE=1 SV=2	0	5.957	4	1	8	1	1	250	29.4	10.37	High	High	High	High		1.158	92.6716	107.328	91.9	93.5	108.1	106.5	0.292	0	5.55	1	34	1
FALSE	High	IsMasterProtein	Q96GC5	39S ribosomal protein L48, mitochondrial OS=Homo sapiens GN=MRPL48 PE=1 SV=2	0	6.376	5.18868	1	6	1	1	212	23.9	8.98	High	Peak Found	High	High		1.098	95.3191	104.681	94.8	95.9	105.2	104.1	0.468	0	8.7	1	79	1
FALSE	High	IsMasterProtein	ch11i_Q13405	39S ribosomal protein L49, mitochondrial OS=Homo sapiens GN=MRPL49 PE=1 SV=1	0	38.22	30.1205	4	36	4	1	166	19.2	9.45	High	High	High	High		1.389	83.7022	116.298	82.8	84.6	117.2	115.4	1.929	0	41.52	4	764	4
FALSE	High	IsMasterProtein	ch09u_Q8N5N7	39S ribosomal protein L50, mitochondrial OS=Homo sapiens GN=MRPL50 PE=1 SV=2	0	63.281	44.3038	5	36	5	1	158	18.3	7.88	High	High	High	High		1.075	96.366	103.634	94.5	98.2	105.5	101.8	9	0	50.24	5	624	5
FALSE	High	IsMasterProtein	Q96EL3	39S ribosomal protein L53, mitochondrial OS=Homo sapiens GN=MRPL53 PE=1 SV=1	0	20.632	26.7857	2	10	2	1	112	12.1	8.76	High	Peak Found	High	High		1.751	72.7112	127.289	72.9	72.6	127.1	127.4	1.154	0	16.19	2	289	2
FALSE	High	IsMasterProtein	Q6P161	39S ribosomal protein L54, mitochondrial OS=Homo sapiens GN=MRPL54 PE=1 SV=1	0.009	2.19	7.24638	1	4	1	1	138	15.8	9.6	Peak Found	Peak Found	High	High		1.293	87.2185	112.781	88	86.4	112	113.6	0.468	0	4.51	1	49	1
FALSE	High	IsMasterProtein	ch01u_Q9BYD2	39S ribosomal protein L9, mitochondrial OS=Homo sapiens GN=MRPL9 PE=1 SV=2	0	40.141	20.2247	4	24	4	1	267	30.2	10.08	High	High	High	High		0.921	104.114	95.8865	107.8	100.4	92.2	99.6	1.637	0	28.83	4	396	4
FALSE	High	IsMasterProtein	chXi_Q15125	3-beta-hydroxysteroid-Delta(8),Delta(7)-isomerase OS=Homo sapiens GN=EBP PE=1 SV=3	0	24.534	6.95652	1	4	1	1	230	26.3	7.9	Not Found	High	Not Found	Peak Found	Acetyl [N-Term]	0.865	107.218	92.782		107.2		92.8	1.371	0			120	1
FALSE	High	IsMasterProtein	ch07u_P31937	3-hydroxyisobutyrate dehydrogenase, mitochondrial OS=Homo sapiens GN=HIBADH PE=1 SV=2	0	66.853	19.3452	4	38	4	1	336	35.3	8.13	High	High	High	High		0.955	102.284	97.7161	101.3	103.3	98.7	96.7	2.384	0	50.79	4	946	4
FALSE	High	IsMasterProtein	ch02u_Q6NVY1	3-hydroxyisobutyryl-CoA hydrolase, mitochondrial OS=Homo sapiens GN=HIBCH PE=1 SV=2	0	44.539	6.99482	2	26	2	1	386	43.5	8.19	High	High	High	High		1.066	96.827	103.173	94.9	98.8	105.1	101.2	0.859	0	34.34	2	386	2
FALSE	Medium	IsMasterProtein	ch06i_Q8TB92	3-hydroxymethyl-3-methylglutaryl-CoA lyase, cytoplasmic OS=Homo sapiens GN=HMGCLL1 PE=1 SV=3	0.031	0.878	1.62162	1	2	1	1	370	39.5	6.58	Not Found	High	Not Found	Peak Found		1.5	80.008	119.992		80		120	0.116	0	0	1	33	1
FALSE	High	IsMasterProtein	ch03u_P09110	3-ketoacyl-CoA thiolase, peroxisomal OS=Homo sapiens GN=ACAA1 PE=1 SV=2	0	59.41	14.6226	3	16	3	1	424	44.3	8.44	High	High	High	High		1.277	87.8219	112.178	89.6	86.1	110.4	113.9	0.995	0	27.14	3	470	3
FALSE	High	IsMasterProtein	P56937	3-keto-steroid reductase OS=Homo sapiens GN=HSD17B7 PE=1 SV=1	0	11.832	9.97067	2	6	2	1	341	38.2	8.1	Peak Found	Peak Found	High	High		3.557	43.8906	156.109	22.2	65.6	177.8	134.4	0.274	0	5.13	2	63	2
FALSE	High	IsMasterProtein	ch03i_Q9NWU1	3-oxoacyl-[acyl-carrier-protein] synthase, mitochondrial OS=Homo sapiens GN=OXSM PE=1 SV=1	0	31.105	8.7146	3	18	3	1	459	48.8	7.66	High	High	High	High		1.051	97.5013	102.499	96.1	98.9	103.9	101.1	0.65	0	19.31	3	464	3
FALSE	High	IsMasterProtein	ch16u_O15530	3-phosphoinositide-dependent protein kinase 1 OS=Homo sapiens GN=PDPK1 PE=1 SV=1	0	19.574	10.9712	4	16	4	1	556	63.1	7.36	High	Peak Found	High	High		8.114	21.9431	178.057	32.9	11	167.1	189	0.45	0	15.16	4	276	4
FALSE	High	IsMasterProtein	ch06u_P46783	40S ribosomal protein S10 OS=Homo sapiens GN=RPS10 PE=1 SV=1	0	85.459	23.6364	4	102	4	1	165	18.9	10.15	High	High	High	High		1.072	96.5446	103.455	96.4	96.7	103.6	103.3	7.377	0	139.5	4	2274	4
FALSE	High	IsMasterProtein	ch19i_P62280	40S ribosomal protein S11 OS=Homo sapiens GN=RPS11 PE=1 SV=3	0	56.931	32.9114	5	44	5	1	158	18.4	10.3	High	High	High	High		1.096	95.4372	104.563	95.2	95.6	104.8	104.4	9	0	57.39	5	867	5
FALSE	High	IsMasterProtein	P25398	40S ribosomal protein S12 OS=Homo sapiens GN=RPS12 PE=1 SV=3	0	144.18	55.303	6	127	6	1	132	14.5	7.21	High	High	High	High	Acetyl [N-Term]	0.988	100.6	99.4002	100.7	100.5	99.3	99.5	371.759	0	124.53	5	3893	6
FALSE	High	IsMasterProtein	P62277	40S ribosomal protein S13 OS=Homo sapiens GN=RPS13 PE=1 SV=2	0	100.805	33.1126	7	91	7	1	151	17.2	10.54	High	High	High	High		1.031	98.458	101.542	98.3	98.6	101.7	101.4	42.288	0	109.08	7	1299	7
FALSE	High	IsMasterProtein	ch05u_P62263	40S ribosomal protein S14 OS=Homo sapiens GN=RPS14 PE=1 SV=3	0	108.209	31.1258	5	78	5	1	151	16.3	10.05	High	High	High	High		1.072	96.534	103.466	97	96.1	103	103.9	192.07	0	107.95	5	1616	5
FALSE	High	IsMasterProtein	ch19i_K7ELC2	40S ribosomal protein S15 OS=Homo sapiens GN=RPS15 PE=1 SV=1	0	11.942	7.89474	1	6	1	1	152	17.7	10.39	Peak Found	High	High	High		0.803	110.904	89.0959	106.1	115.7	93.9	84.3	0.931	0	4.83	1	55	1
FALSE	High	IsMasterProtein	P62244	40S ribosomal protein S15a OS=Homo sapiens GN=RPS15A PE=1 SV=2	0	51.749	23.8462	3	52	1	1	130	14.8	10.13	High	High	High	High		1.028	98.6039	101.396	98.8	98.4	101.2	101.6	7.111	0	62.24	3	1023	3
FALSE	High	IsMasterProtein	ch19u_P62249	40S ribosomal protein S16 OS=Homo sapiens GN=RPS16 PE=1 SV=2	0	83.364	50.6849	9	107	9	1	146	16.4	10.21	High	High	High	High		1.137	93.5968	106.403	93.8	93.4	106.2	106.6	99	0	119.75	8	1372	9
FALSE	High	IsMasterProtein	ch15u_P08708	40S ribosomal protein S17 OS=Homo sapiens GN=RPS17 PE=1 SV=2	0	154.381	42.963	6	112	6	1	135	15.5	9.85	High	High	High	High		1.085	95.9296	104.07	95.9	95.9	104.1	104.1	4640.59	0	146.51	6	2639	6
FALSE	High	IsMasterProtein	ch06i_P62269	40S ribosomal protein S18 OS=Homo sapiens GN=RPS18 PE=1 SV=3	0	47.286	26.3158	4	72	4	1	152	17.7	10.99	High	High	High	High		1.043	97.8959	102.104	98.1	97.7	101.9	102.3	5.813	0	84.51	4	1372	4
FALSE	High	IsMasterProtein	H3BNG3	40S ribosomal protein S2 (Fragment) OS=Homo sapiens GN=RPS2 PE=1 SV=1	0	40.427	63.6364	3	46	1	1	44	5.1	6.62	High	High	High	High		1.181	91.6929	108.307	91.2	92.2	108.8	107.8	999	0	62.05	3	983	3
FALSE	High	IsMasterProtein	P15880	40S ribosomal protein S2 OS=Homo sapiens GN=RPS2 PE=1 SV=2	0	120.073	38.2253	10	140	8	1	293	31.3	10.24	High	High	High	High		1.027	98.648	101.352	98.7	98.6	101.3	101.4	9	3	182.72	10	1813	10
FALSE	High	IsMasterProtein	ch20i_Q9BYK1	40S ribosomal protein S21 OS=Homo sapiens GN=RPS21 PE=1 SV=1	0	65.294	32.2222	2	24	2	1	90	9.9	7.83	High	High	High	High	Acetyl [N-Term]	1.156	92.7603	107.24	94.7	90.8	105.3	109.2	13.678	0	34.4	2	1028	2
FALSE	High	IsMasterProtein	ch05u_P62266	40S ribosomal protein S23 OS=Homo sapiens GN=RPS23 PE=1 SV=3	0	112.264	27.2727	3	89	3	1	143	15.8	10.49	High	High	High	High		1.042	97.9547	102.045	97.7	98.2	102.3	101.8	41.17	0	85.19	3	1954	3
FALSE	High	IsMasterProtein	ch07i_P62851	40S ribosomal protein S25 OS=Homo sapiens GN=RPS25 PE=1 SV=1	0	56.37	24	4	91	4	1	125	13.7	10.11	High	High	High	High		0.992	100.426	99.5739	100.5	100.4	99.5	99.6	315.228	0	110.61	4	1534	4
FALSE	High	IsMasterProtein	P62854	40S ribosomal protein S26 OS=Homo sapiens GN=RPS26 PE=1 SV=3	0	17.244	13.0435	1	18	1	1	115	13	11	High	High	High	High		0.983	100.838	99.1621	100.5	101.2	99.5	98.8	1.154	0	22.08	1	387	1
FALSE	High	IsMasterProtein	ch01i_P42677	40S ribosomal protein S27 OS=Homo sapiens GN=RPS27 PE=1 SV=3	0	44.642	28.5714	2	43	1	1	84	9.5	9.45	High	High	High	High		1.133	93.7826	106.217	93.8	93.8	106.2	106.2	62.096	0	39.05	2	385	2
FALSE	High	IsMasterProtein	H0YMV8	40S ribosomal protein S27 OS=Homo sapiens GN=RPS27L PE=1 SV=1	0	48.196	25	3	37	2	1	100	11.3	9.32	High	High	High	High		1.285	87.5366	112.463	87.8	87.3	112.2	112.7	45.416	3	25.98	3	345	3
FALSE	High	IsMasterProtein	H0YEU2	40S ribosomal protein S3 (Fragment) OS=Homo sapiens GN=RPS3 PE=1 SV=1	0	170.301	66.6667	11	220	1	1	171	18.7	8.41	High	High	Peak Found	Peak Found		1.078	96.2513	103.749	95.5	97	104.5	103	202.092	0	273.69	9	3170	11
FALSE	High	IsMasterProtein	P23396	40S ribosomal protein S3 OS=Homo sapiens GN=RPS3 PE=1 SV=2	0	220.432	61.3169	15	288	5	1	243	26.7	9.66	High	High	High	High		1.044	97.834	102.166	98.3	97.4	101.7	102.6	126.427	15	344.7	15	3867	15
FALSE	High	IsMasterProtein	ch11i_E9PR30	40S ribosomal protein S30 OS=Homo sapiens GN=FAU PE=1 SV=1	0	10.579	11.2245	2	24	2	1	98	10.9	11.56	High	High	High	High		1.329	85.8773	114.123	85.9	85.8	114.1	114.2	2.162	0	22.55	2	369	2
FALSE	High	IsMasterProtein	ch04i_P61247	40S ribosomal protein S3a OS=Homo sapiens GN=RPS3A PE=1 SV=2	0	217.96	36.3636	10	196	10	1	264	29.9	9.73	High	High	High	High		0.982	100.92	99.0796	101	100.9	99	99.1	60.585	0	221.62	10	4745	10
FALSE	High	IsMasterProtein	chXu_P62701	40S ribosomal protein S4, X isoform OS=Homo sapiens GN=RPS4X PE=1 SV=2	0	135.99	43.346	10	192	10	1	263	29.6	10.15	High	High	High	High		1.043	97.877	102.123	97.9	97.8	102.1	102.2	16.783	0	189.4	10	3179	10
FALSE	High	IsMasterProtein	ch19i_P46782	40S ribosomal protein S5 OS=Homo sapiens GN=RPS5 PE=1 SV=4	0	131.291	36.7647	6	118	6	1	204	22.9	9.72	High	High	High	High	Acetyl [N-Term; N-Term]	1.103	95.0999	104.9	95.2	95	104.8	105	49.119	0	160.67	5	3635	6
FALSE	High	IsMasterProtein	ch09u_A2A3R5	40S ribosomal protein S6 OS=Homo sapiens GN=RPS6 PE=1 SV=1	0	97.851	19.2661	6	87	2	1	218	25	11.14	High	High	Peak Found	Peak Found	Acetyl [N-Term]	1.175	91.9357	108.064	93.3	90.5	106.7	109.5	27.48	0	91.13	5	2258	6
FALSE	High	IsMasterProtein	ch09i_P62753	40S ribosomal protein S6 OS=Homo sapiens GN=RPS6 PE=1 SV=1	0	86.671	22.0884	7	85	2	1	249	28.7	10.84	Peak Found	Peak Found	High	High		1.098	95.3129	104.687	95.4	95.2	104.6	104.8	10.938	8	98.61	6	1855	7
FALSE	High	IsMasterProtein	P62081	40S ribosomal protein S7 OS=Homo sapiens GN=RPS7 PE=1 SV=1	0	179.618	48.4536	7	119	7	1	194	22.1	10.1	High	High	High	High		1.095	95.4639	104.536	96.5	94.4	103.5	105.6	80.113	0	183.74	7	1989	6
FALSE	High	IsMasterProtein	ch01u_P62241	40S ribosomal protein S8 OS=Homo sapiens GN=RPS8 PE=1 SV=2	0	156.144	48.0769	8	231	8	1	208	24.2	10.32	High	High	High	High		0.995	100.242	99.7583	100.5	100	99.5	100	500.187	0	277.18	8	4094	8
FALSE	High	IsMasterProtein	ch19u_P46781	40S ribosomal protein S9 OS=Homo sapiens GN=RPS9 PE=1 SV=3	0	60.021	24.2268	7	120	7	1	194	22.6	10.65	High	High	High	High		1.019	99.0692	100.931	99.2	99	100.8	101	21.758	0	93.65	7	931	7
FALSE	High	IsMasterProtein	ch03u_A0A0C4DG17	40S ribosomal protein SA OS=Homo sapiens GN=RPSA PE=1 SV=1	0	284.389	50	13	276	13	1	300	33.3	4.87	High	High	High	High	Acetyl [N-Term]	1.032	98.4183	101.582	96.9	99.9	103.1	100.1	272.842	0	398.81	11	6967	13
FALSE	High	IsMasterProtein	ch01i_Q9BRK5	45 kDa calcium-binding protein OS=Homo sapiens GN=SDF4 PE=1 SV=1	0	19.225	13.2597	5	16	5	1	362	41.8	4.86	Peak Found	Peak Found	High	High		4.125	39.0279	160.972	33.5	44.5	166.5	155.5	0.73	0	17.13	5	219	5
FALSE	High	IsMasterProtein	ch11u_J3KPF3	4F2 cell-surface antigen heavy chain OS=Homo sapiens GN=SLC3A2 PE=1 SV=1	0	504.672	45.3249	24	357	2	1	631	68.1	5.05	High	High	High	High	Acetyl [N-Term]	1.706	73.9115	126.088	73.6	74.3	126.4	125.7	106.227	35	546.85	24	8885	24
FALSE	High	IsMasterProtein	P49189	4-trimethylaminobutyraldehyde dehydrogenase OS=Homo sapiens GN=ALDH9A1 PE=1 SV=3	0	85.264	23.2794	9	56	9	1	494	53.8	5.87	High	High	High	High	Acetyl [N-Term]	1.154	92.8488	107.151	91.8	93.9	108.2	106.1	2.914	0	52.47	8	912	9
FALSE	High	IsMasterProtein	Q8TCD5	5'(3')-deoxyribonucleotidase, cytosolic type OS=Homo sapiens GN=NT5C PE=1 SV=2	0	66.449	42.7861	5	40	5	1	201	23.4	6.64	High	High	High	High		1.056	97.2591	102.741	95.1	99.4	104.9	100.6	7.254	0	40.14	5	513	5
FALSE	High	IsMasterProtein	ch03i_Q8IZH2	5'-3' exoribonuclease 1 OS=Homo sapiens GN=XRN1 PE=1 SV=1	0	22.983	3.75147	4	8	4	1	1706	194	7.21	Peak Found	Peak Found	High	High		1.122	94.2403	105.76	55.6	132.9	144.4	67.1	0.113	0	9.6	4	196	4
FALSE	High	IsMasterProtein	A0A0U1RQM3	5-formyltetrahydrofolate cyclo-ligase OS=Homo sapiens GN=MTHFS PE=1 SV=1	0	19.406	18.5345	3	22	3	1	232	26.1	8.66	High	High	High	High		1.303	86.8274	113.173	87.5	86.1	112.5	113.9	0.848	0	28.02	3	234	3
FALSE	High	IsMasterProtein	Q96CB9	5-methylcytosine rRNA methyltransferase NSUN4 OS=Homo sapiens GN=NSUN4 PE=1 SV=2	0	7.107	5.72917	2	4	2	1	384	43.1	8.18	Peak Found	High	High	Peak Found		1.528	79.1175	120.883	58.2	100.1	141.8	99.9	0.274	0	4.68	2	37	2
FALSE	High	IsMasterProtein	B7ZLW8	5-methyltetrahydrofolate-homocysteine methyltransferase OS=Homo sapiens GN=MTR PE=2 SV=1	0	19.965	4.03162	4	10	4	1	1265	140.5	5.55	Peak Found	Not Found	High	High		4.285	37.8429	162.157	37.8		162.2		0.127	0	11.76	4	177	4
FALSE	High	IsMasterProtein	Q5TFE4	5'-nucleotidase domain-containing protein 1 OS=Homo sapiens GN=NT5DC1 PE=1 SV=1	0	79.833	24.1758	7	54	7	1	455	51.8	6.35	High	High	High	High		1.27	88.1069	111.893	86.5	89.7	113.5	110.3	1.683	0	64.47	7	913	7
FALSE	High	IsMasterProtein	Q86UY8	5'-nucleotidase domain-containing protein 3 OS=Homo sapiens GN=NT5DC3 PE=1 SV=1	0	10.065	5.65693	3	8	3	1	548	63.4	8.31	High	Peak Found	High	High		0.936	103.28	96.7205	96.2	110.3	103.8	89.7	0.259	0	6	3	36	3
FALSE	High	IsMasterProtein	A7E261	5-oxoprolinase (ATP-hydrolysing) OS=Homo sapiens GN=OPLAH PE=2 SV=1	0	15.257	2.63975	2	6	2	1	1288	137.3	6.58	Peak Found	Not Found	High	High		2.091	64.7019	135.298	64.7		135.3		0.077	0	8.78	2	196	2
FALSE	High	IsMasterProtein	B9VP19	60 kDa chaperonin (Fragment) OS=Homo sapiens GN=HSPD1 PE=4 SV=1	0	150.37	44.5652	6	205	1	1	184	19.8	8.05	Not Found	Not Found	Not Found	Not Found									55.234	0	327.01	5	6147	6
FALSE	High	IsMasterProtein	ch02u_P10809	60 kDa heat shock protein, mitochondrial OS=Homo sapiens GN=HSPD1 PE=1 SV=2	0	891.467	65.445	32	1152	18	1	573	61	5.87	High	High	High	High		0.982	100.931	99.0693	100.5	101.4	99.5	98.6	1210.53	32	1639.27	32	30965	32
FALSE	High	IsMasterProtein	P10155	60 kDa SS-A/Ro ribonucleoprotein OS=Homo sapiens GN=TROVE2 PE=1 SV=2	0	53.103	14.684	5	32	5	1	538	60.6	8.03	High	High	High	High		1.247	89.0235	110.976	88.3	89.7	111.7	110.3	0.84	0	44.99	5	456	5
FALSE	High	IsMasterProtein	A0A024RBS2	60S acidic ribosomal protein P0 OS=Homo sapiens GN=RPLP0 PE=3 SV=1	0	213.612	41.9558	9	172	4	1	317	34.3	5.97	High	High	High	High		1.018	99.0934	100.907	98.7	99.5	101.3	100.5	19.691	9	255.48	9	4372	9
FALSE	High	IsMasterProtein	Unplacedu_Q8NHW5	60S acidic ribosomal protein P0-like OS=Homo sapiens GN=RPLP0P6 PE=5 SV=1	0	106.337	31.5457	6	116	1	1	317	34.3	5.55	Not Found	Not Found	High	Not Found		100		200			200		4.623	0	148.67	6	2574	6
FALSE	High	IsMasterProtein	ch15u_P05386	60S acidic ribosomal protein P1 OS=Homo sapiens GN=RPLP1 PE=1 SV=1	0	177.604	79.8246	4	99	3	1	114	11.5	4.32	High	High	High	High	Acetyl [N-Term]	0.989	100.547	99.4534	100.9	100.2	99.1	99.8	1583.89	1	76.94	2	3868	4
FALSE	High	IsMasterProtein	ch11i_P05387	60S acidic ribosomal protein P2 OS=Homo sapiens GN=RPLP2 PE=1 SV=1	0	313.229	80.8696	11	197	11	1	115	11.7	4.54	High	High	High	High		1.105	95.0207	104.979	94.9	95.1	105.1	104.9	215442	0	320.61	11	5824	11
FALSE	High	IsMasterProtein	ch03i_C9JA08	60S ribosomal export protein NMD3 OS=Homo sapiens GN=NMD3 PE=1 SV=1	0	71.57	19.2817	7	34	7	1	529	60.1	6.62	High	High	High	High		5.596	30.3207	169.679	27.8	32.8	172.2	167.2	1.154	0	44.96	7	631	7
FALSE	High	IsMasterProtein	chXu_F8W7C6	60S ribosomal protein L10 OS=Homo sapiens GN=RPL10 PE=1 SV=2	0	52.441	26.3804	4	22	1	1	163	18.6	9.95	High	High	Peak Found	Peak Found		2.749	53.3473	146.653	53.7	53	146.3	147	5.31	0	23.74	3	631	4
FALSE	High	IsMasterProtein	chXu_P27635	60S ribosomal protein L10 OS=Homo sapiens GN=RPL10 PE=1 SV=4	0	65.444	24.7664	4	23	1	1	214	24.6	10.08	Peak Found	Peak Found	High	High		1.961	67.5546	132.445	66.4	68.7	133.6	131.3	3.924	5	32.12	4	572	4
FALSE	High	IsMasterProtein	ch06i_P62906	60S ribosomal protein L10a OS=Homo sapiens GN=RPL10A PE=1 SV=2	0	164.06	27.6498	7	126	7	1	217	24.8	9.94	High	High	High	High		1.008	99.6099	100.39	99.8	99.5	100.2	100.5	62.096	0	168.89	7	1547	7
FALSE	High	IsMasterProtein	ch01u_P62913	60S ribosomal protein L11 OS=Homo sapiens GN=RPL11 PE=1 SV=2	0	28.244	12.9213	2	49	2	1	178	20.2	9.6	High	High	High	High		1.026	98.7327	101.267	99	98.4	101	101.6	3.642	0	50.98	2	740	2
FALSE	High	IsMasterProtein	P30050	60S ribosomal protein L12 OS=Homo sapiens GN=RPL12 PE=1 SV=1	0	140.402	54.5455	6	138	6	1	165	17.8	9.42	High	High	High	High		1.005	99.7664	100.234	99.7	99.8	100.3	100.2	64.793	0	200.39	6	3613	6
FALSE	High	IsMasterProtein	ch16u_P26373	60S ribosomal protein L13 OS=Homo sapiens GN=RPL13 PE=1 SV=4	0	34.499	21.8009	5	77	5	1	211	24.2	11.65	High	High	High	High		1.213	90.3652	109.635	91.1	89.6	108.9	110.4	6.197	0	50.11	5	710	5
FALSE	High	IsMasterProtein	ch19u_M0QYS1	60S ribosomal protein L13a (Fragment) OS=Homo sapiens GN=RPL13A PE=1 SV=2	0	40.542	19.0476	5	100	5	1	210	24.2	10.86	High	High	High	High	Acetyl [N-Term]	1.265	88.3062	111.694	90.3	86.3	109.7	113.7	3.437	0	78.68	4	1120	5
FALSE	High	IsMasterProtein	ch03u_P61313	60S ribosomal protein L15 OS=Homo sapiens GN=RPL15 PE=1 SV=2	0	94.382	23.0392	5	108	5	1	204	24.1	11.62	High	High	High	High		1.225	89.8916	110.108	90.2	89.6	109.8	110.4	18.307	0	131.86	5	1669	5
FALSE	High	IsMasterProtein	ch19u_J3QQ67	60S ribosomal protein L18 (Fragment) OS=Homo sapiens GN=RPL18 PE=1 SV=1	0	66.371	25.7895	5	101	5	1	190	21.8	11.72	High	High	High	High		1.229	89.7369	110.263	89.6	89.9	110.4	110.1	26.826	0	132.55	5	2197	5
FALSE	High	IsMasterProtein	B2R4C0	60S ribosomal protein L18a OS=Homo sapiens PE=2 SV=1	0	58.827	25.5682	5	92	5	1	176	20.7	10.71	High	High	High	High		1.138	93.5353	106.465	93.2	93.9	106.8	106.1	5.105	0	116.13	5	1552	5
FALSE	High	IsMasterProtein	ch17u_P84098	60S ribosomal protein L19 OS=Homo sapiens GN=RPL19 PE=1 SV=1	0	81.623	9.18367	2	106	2	1	196	23.5	11.47	High	High	High	High		1.389	83.6999	116.3	83.6	83.8	116.4	116.2	6.743	0	116.78	2	3462	2
FALSE	High	IsMasterProtein	ch01u_P35268	60S ribosomal protein L22 OS=Homo sapiens GN=RPL22 PE=1 SV=2	0	47.313	50.7812	4	56	4	1	128	14.8	9.19	High	High	High	High		1.042	97.9466	102.053	97.5	98.4	102.5	101.6	13.678	0	75.7	4	1149	4
FALSE	High	IsMasterProtein	ch03u_H0Y8C2	60S ribosomal protein L22-like 1 (Fragment) OS=Homo sapiens GN=RPL22L1 PE=1 SV=1	0	17.562	25.3521	2	10	2	1	142	16.9	9.25	Peak Found	Peak Found	High	High		1.761	72.4339	127.566	71.8	73.1	128.2	126.9	1.154	0	13.05	2	275	2
FALSE	High	IsMasterProtein	ch17u_P62829	60S ribosomal protein L23 OS=Homo sapiens GN=RPL23 PE=1 SV=1	0	102.808	49.2857	5	155	5	1	140	14.9	10.51	High	High	High	High		1.147	93.1654	106.835	94.4	91.9	105.6	108.1	24.119	0	165.19	5	2840	5
FALSE	High	IsMasterProtein	A8MUS3	60S ribosomal protein L23a OS=Homo sapiens GN=RPL23A PE=1 SV=1	0	55.445	28.866	6	89	6	1	194	21.9	10.48	High	High	High	High		1.227	89.8225	110.178	89.7	89.9	110.3	110.1	17.738	0	89.34	6	1093	6
FALSE	High	IsMasterProtein	ch03i_P83731	60S ribosomal protein L24 OS=Homo sapiens GN=RPL24 PE=1 SV=1	0	52.476	26.1146	5	40	5	1	157	17.8	11.25	High	High	High	High		1.451	81.6124	118.388	81.9	81.3	118.1	118.7	18.953	0	41.1	4	850	5
FALSE	High	IsMasterProtein	ch17u_J3QRC4	60S ribosomal protein L26 (Fragment) OS=Homo sapiens GN=RPL26 PE=4 SV=1	0	10.821	13.3333	3	30	3	1	135	15.7	11.21	High	High	High	High		1.532	78.9883	121.012	77.8	80.2	122.2	119.8	1.848	0	19.42	2	263	3
FALSE	High	IsMasterProtein	ch17u_K7ELC7	60S ribosomal protein L27 (Fragment) OS=Homo sapiens GN=RPL27 PE=1 SV=1	0	103.614	37.5	6	104	6	1	144	16.5	10.58	High	High	High	High		1.303	86.859	113.141	86.6	87.1	113.4	112.9	371.759	0	128.59	6	1142	6
FALSE	High	IsMasterProtein	ch11i_P46776	60S ribosomal protein L27a OS=Homo sapiens GN=RPL27A PE=1 SV=2	0	49.22	22.973	4	82	4	1	148	16.6	11	High	High	High	High		1.157	92.7048	107.295	93.1	92.3	106.9	107.7	22.714	0	92.71	4	999	4
FALSE	High	IsMasterProtein	ch19i_H0YKD8	60S ribosomal protein L28 OS=Homo sapiens GN=RPL28 PE=1 SV=1	0	17.959	10.5882	2	10	2	1	170	19.1	11.46	High	High	Peak Found	High	Acetyl [N-Term]	1.248	88.9874	111.013	87.6	90.3	112.4	109.7	1.894	0	3.77	1	132	2
FALSE	High	IsMasterProtein	ch22i_P39023	60S ribosomal protein L3 OS=Homo sapiens GN=RPL3 PE=1 SV=2	0	320.418	31.0174	11	190	11	1	403	46.1	10.18	High	High	High	High		1.014	99.31	100.69	100.3	98.3	99.7	101.7	110.034	0	273.19	11	2925	11
FALSE	High	IsMasterProtein	P62888	60S ribosomal protein L30 OS=Homo sapiens GN=RPL30 PE=1 SV=2	0	172.196	51.3043	5	132	5	1	115	12.8	9.63	High	High	High	High		1.179	91.7723	108.228	91.4	92.1	108.6	107.9	748.894	0	216.56	5	3158	5
FALSE	High	IsMasterProtein	ch02u_B7Z4C8	60S ribosomal protein L31 OS=Homo sapiens GN=RPL31 PE=1 SV=1	0	40.629	17.6923	2	20	2	1	130	15.1	10.37	High	High	High	High		1.211	90.47	109.53	91.4	89.5	108.6	110.5	3.217	0	28.89	2	482	2
FALSE	High	IsMasterProtein	ch03i_F8W727	60S ribosomal protein L32 OS=Homo sapiens GN=RPL32 PE=1 SV=1	0	42.089	24.183	3	42	3	1	153	18	10.59	High	High	High	High		1.146	93.205	106.795	93.2	93.2	106.8	106.8	4.995	0	53.9	3	678	3
FALSE	High	IsMasterProtein	P49207	60S ribosomal protein L34 OS=Homo sapiens GN=RPL34 PE=1 SV=3	0.001	4.048	6.83761	1	12	1	1	117	13.3	11.47	High	High	High	High		1.037	98.1635	101.837	99.1	97.2	100.9	102.8	1.154	0	1.68	1	119	1
FALSE	High	IsMasterProtein	ch03i_P18077	60S ribosomal protein L35a OS=Homo sapiens GN=RPL35A PE=1 SV=2	0	12.031	9.09091	2	20	2	1	110	12.5	11.06	High	High	High	High		1.084	95.9908	104.009	95.9	96.1	104.1	103.9	2.594	0	18.44	2	186	2
FALSE	High	IsMasterProtein	Q9Y3U8	60S ribosomal protein L36 OS=Homo sapiens GN=RPL36 PE=1 SV=3	0	11.558	18.0952	2	32	2	1	105	12.2	11.59	High	High	High	High		1.078	96.2506	103.749	95.6	96.9	104.4	103.1	3.642	0	31.15	2	267	2
FALSE	High	IsMasterProtein	ch02u_P61513	60S ribosomal protein L37a OS=Homo sapiens GN=RPL37A PE=1 SV=2	0	36.713	32.6087	2	55	2	1	92	10.3	10.43	High	High	High	High		1.245	89.0905	110.909	90.5	87.6	109.5	112.4	5.813	0	80.45	2	1349	2
FALSE	High	IsMasterProtein	Q9HBB3	60S ribosomal protein L6 OS=Homo sapiens PE=2 SV=1	0	143.111	32.872	9	132	9	1	289	32.9	10.58	High	High	High	High		1.147	93.1704	106.83	93	93.3	107	106.7	10.22	0	160.21	9	2723	9
FALSE	High	IsMasterProtein	ch09u_P62424	60S ribosomal protein L7a OS=Homo sapiens GN=RPL7A PE=1 SV=2	0	303.668	31.203	12	212	12	1	266	30	10.61	High	High	High	High		1.182	91.6399	108.36	91.3	92	108.7	108	734.642	0	316.21	12	4728	12
FALSE	High	IsMasterProtein	ch08u_P62917	60S ribosomal protein L8 OS=Homo sapiens GN=RPL8 PE=1 SV=2	0	104.716	28.4047	4	68	4	1	257	28	11.03	High	High	High	High		1.25	88.9077	111.092	89.2	88.6	110.8	111.4	4.179	0	110.24	4	1854	4
FALSE	High	IsMasterProtein	ch04i_P32969	60S ribosomal protein L9 OS=Homo sapiens GN=RPL9 PE=1 SV=1	0	141.129	42.7083	6	132	6	1	192	21.9	9.95	High	High	High	High		1.015	99.2504	100.75	98.8	99.7	101.2	100.3	64.793	0	140.79	6	3069	6
FALSE	High	IsMasterProtein	Q9Y221	60S ribosome subunit biogenesis protein NIP7 homolog OS=Homo sapiens GN=NIP7 PE=1 SV=1	0	37.984	24.4444	3	25	3	1	180	20.4	8.51	High	High	High	High		1.029	98.5525	101.447	99.6	97.5	100.4	102.5	3.329	0	26.46	3	304	3
FALSE	High	IsMasterProtein	ch01u_O60825	6-phosphofructo-2-kinase/fructose-2,6-bisphosphatase 2 OS=Homo sapiens GN=PFKFB2 PE=1 SV=2	0	10.034	4.55446	2	6	1	1	505	58.4	8.38	Not Found	Not Found	High	Not Found		100		200			200		0.125	0	5.93	2	79	2
FALSE	High	IsMasterProtein	ch01u_P52209	6-phosphogluconate dehydrogenase, decarboxylating OS=Homo sapiens GN=PGD PE=1 SV=3	0	365.588	35.4037	17	443	17	1	483	53.1	7.23	High	High	High	High		1.187	91.443	108.557	91.3	91.6	108.7	108.4	49.119	0	593.67	17	9864	17
FALSE	High	IsMasterProtein	ch19u_O95336	6-phosphogluconolactonase OS=Homo sapiens GN=PGLS PE=1 SV=2	0	137.356	58.1395	9	70	9	1	258	27.5	6.05	High	High	High	High	Acetyl [N-Term]	1.04	98.0234	101.977	98.5	97.5	101.5	102.5	14.849	0	82.56	8	1542	9
FALSE	High	IsMasterProtein	P36639	7,8-dihydro-8-oxoguanine triphosphatase OS=Homo sapiens GN=NUDT1 PE=1 SV=3	0	19.49	14.2132	2	10	2	1	197	22.5	5.27	High	High	High	High		2.659	54.6604	145.34	54.5	54.8	145.5	145.2	0.778	0	14.58	2	212	2
FALSE	High	IsMasterProtein	A0A024R5F7	7-dehydrocholesterol reductase isoform 1 OS=Homo sapiens GN=DHCR7 PE=2 SV=1	0	23.439	7.36842	2	10	2	1	475	54.5	8.7	High	High	High	High		1.949	67.8194	132.181	64.6	71	135.4	129	0.468	0	12.46	2	392	2
FALSE	High	IsMasterProtein	Q969T7	7-methylguanosine phosphate-specific 5'-nucleotidase OS=Homo sapiens GN=NT5C3B PE=1 SV=4	0.001	4.644	3.66667	1	4	1	1	300	34.4	6.38	Not Found	Not Found	Not Found	High									0.122	0	4.38	1	83	1
FALSE	Medium	IsMasterProtein	ch12u_P59510	A disintegrin and metalloproteinase with thrombospondin motifs 20 OS=Homo sapiens GN=ADAMTS20 PE=2 SV=2	0.013	1.819	0.680628	1	7	1	1	1910	214.6	7.21	High	High	Peak Found	High		0.953	102.418	97.5825	102.1	102.7	97.9	97.3	0.047	0	0	1	0	1
FALSE	High	IsMasterProtein	ch01i_P42684	Abelson tyrosine-protein kinase 2 OS=Homo sapiens GN=ABL2 PE=1 SV=1	0	17.657	3.89171	2	6	2	1	1182	128.3	8.07	Peak Found	Peak Found	High	High		3.037	49.5432	150.457	46.8	52.3	153.2	147.7	0.076	0	9.7	2	145	2
FALSE	High	IsMasterProtein	V9HW87	Abhydrolase domain containing 14B, isoform CRA_a OS=Homo sapiens GN=HEL-S-299 PE=2 SV=1	0	22.55	19.5238	3	16	3	1	210	22.3	6.4	High	High	High	High		1.364	84.6197	115.38	82.1	87.1	117.9	112.9	1.31	0	15.79	3	211	3
FALSE	High	IsMasterProtein	Q8IZP0	Abl interactor 1 OS=Homo sapiens GN=ABI1 PE=1 SV=4	0	52.092	19.8819	8	24	8	1	508	55	7.06	High	High	High	High	Acetyl [N-Term]	1.282	87.6439	112.356	88.5	86.8	111.5	113.2	1.994	0	25.26	7	413	8
FALSE	High	IsMasterProtein	ch02u_F8WAL6	Abl interactor 2 OS=Homo sapiens GN=ABI2 PE=1 SV=2	0	31.104	8.18713	3	12	3	1	513	55.6	6.02	High	Peak Found	High	High		1.846	70.2651	129.735	71	69.5	129	130.5	0.778	0	14.22	3	274	3
FALSE	High	IsMasterProtein	ch01i_Q8IZT6	Abnormal spindle-like microcephaly-associated protein OS=Homo sapiens GN=ASPM PE=1 SV=2	0	23.719	2.01323	4	10	4	1	3477	409.5	10.45	Not Found	Peak Found	High	High		2.044	78.6028	160.699		78.6	200	121.4	0.042	0	15.53	4	222	4
FALSE	High	IsMasterProtein	ch06i_A0A0J9YWL0	Absent in melanoma 1 protein OS=Homo sapiens GN=AIM1 PE=1 SV=1	0	7.43	0.750821	1	2	1	1	2131	231.6	5.81	High	Not Found	Peak Found	Not Found		1.162	92.5182	107.482	92.5		107.5		0.02	0	2.05	1	55	1
FALSE	High	IsMasterProtein	ch12u_Q86V21	Acetoacetyl-CoA synthetase OS=Homo sapiens GN=AACS PE=1 SV=1	0	23.62	2.67857	1	8	1	1	672	75.1	6.24	High	High	High	High		1.766	72.3029	127.697	70.7	73.9	129.3	126.1	0.119	0	14.7	1	350	1
FALSE	High	IsMasterProtein	A1L0T0	Acetolactate synthase-like protein OS=Homo sapiens GN=ILVBL PE=1 SV=2	0	33.197	7.43671	3	14	3	1	632	67.8	8.15	High	High	High	High		1.476	80.7833	119.217	79.7	81.9	120.3	118.1	0.322	0	19.68	3	560	3
FALSE	High	IsMasterProtein	Q59GW6	Acetyl-CoA acetyltransferase, cytosolic variant (Fragment) OS=Homo sapiens PE=2 SV=1	0	94.056	21.5347	5	38	5	1	404	42.1	7.4	High	High	High	High		1.336	85.6193	114.381	88	83.2	112	116.8	2.162	0	53.78	5	904	5
FALSE	High	IsMasterProtein	ch11i_E9PKF3	Acetyl-CoA acetyltransferase, mitochondrial (Fragment) OS=Homo sapiens GN=ACAT1 PE=1 SV=1	0	37.939	61.1111	2	12	1	1	54	5.4	8.37	Not Found	High	Not Found	Peak Found		1.293	87.2275	112.772		87.2		112.8	16.783	0	19.12	1	296	2
FALSE	High	IsMasterProtein	ch17i_Q13085	Acetyl-CoA carboxylase 1 OS=Homo sapiens GN=ACACA PE=1 SV=2	0	278.83	17.0929	30	171	30	1	2346	265.4	6.37	High	High	High	High	Acetyl [N-Term]	2.221	62.0919	137.908	61.3	62.9	138.7	137.1	1.237	0	200.2	30	2736	30
FALSE	High	IsMasterProtein	ch20i_Q9NUB1	Acetyl-coenzyme A synthetase 2-like, mitochondrial OS=Homo sapiens GN=ACSS1 PE=1 SV=2	0	59.951	16.9811	8	32	8	1	689	74.8	7.11	High	High	High	High		1.39	83.6931	116.307	81.2	86.2	118.8	113.8	1.062	0	33.61	8	544	8
FALSE	High	IsMasterProtein	A0A024R3D8	Acetyltransferase component of pyruvate dehydrogenase complex OS=Homo sapiens GN=DLAT PE=3 SV=1	0	65.625	15.3014	7	52	7	1	647	68.9	7.84	High	High	High	High		1.11	94.8012	105.199	91.1	98.5	108.9	101.5	1.154	0	57.42	7	1137	7
FALSE	High	IsMasterProtein	Q53HS1	Achalasia, adrenocortical insufficiency, alacrimia (Allgrove, triple-A) variant (Fragment) OS=Homo sapiens PE=2 SV=1	0	46.687	14.8352	5	16	5	1	546	59.5	7.5	Peak Found	High	High	High		2.785	52.8335	147.167	80.3	25.4	119.7	174.6	0.562	0	21.48	5	504	5
FALSE	High	IsMasterProtein	Q59EH3	Acid phosphatase 1 isoform c variant (Fragment) OS=Homo sapiens PE=2 SV=1	0	133.034	57.5758	8	100	3	1	165	18.7	7.88	High	High	High	High		1.592	77.1751	122.825	77.6	76.8	122.4	123.2	49.119	7	138.92	8	3162	8
FALSE	High	IsMasterProtein	O43427	Acidic fibroblast growth factor intracellular-binding protein OS=Homo sapiens GN=FIBP PE=1 SV=3	0.001	4.067	3.57143	1	2	1	1	364	41.9	6.48	Peak Found	Not Found	High	Not Found		2.884	51.4867	148.513	51.5		148.5		0.093	0	2.13	1	0	1
FALSE	High	IsMasterProtein	ch15i_P39687	Acidic leucine-rich nuclear phosphoprotein 32 family member A OS=Homo sapiens GN=ANP32A PE=1 SV=1	0	194.465	29.3173	10	167	4	1	249	28.6	4.09	High	High	High	High		1.188	91.403	108.597	91.4	91.4	108.6	108.6	1231.85	10	172	10	3553	10
FALSE	High	IsMasterProtein	ch09u_Q92688	Acidic leucine-rich nuclear phosphoprotein 32 family member B OS=Homo sapiens GN=ANP32B PE=1 SV=1	0	121.249	25.8964	8	125	2	1	251	28.8	4.06	High	High	High	High		1.34	85.4568	114.543	85.8	85.1	114.2	114.9	186.382	0	109.82	8	2639	8
FALSE	High	IsMasterProtein	ch01i_Q9BTT0	Acidic leucine-rich nuclear phosphoprotein 32 family member E OS=Homo sapiens GN=ANP32E PE=1 SV=1	0	169.877	34.7015	7	89	7	1	268	30.7	3.85	High	High	High	High		1.279	87.7663	112.234	89.3	86.2	110.7	113.8	124.893	0	143.71	7	2464	7
FALSE	High	IsMasterProtein	Q4LE36	ACLY variant protein (Fragment) OS=Homo sapiens GN=ACLY variant protein PE=2 SV=1	0	561.523	32.9815	27	456	27	1	1137	124.5	8.03	High	High	High	High		1.646	75.596	124.404	75.8	75.4	124.2	124.6	11.962	0	624.39	27	11130	27
FALSE	High	IsMasterProtein	ch22u_A2A274	Aconitate hydratase, mitochondrial OS=Homo sapiens GN=ACO2 PE=1 SV=1	0	265.954	37.5155	20	136	20	1	805	87.8	7.37	High	High	High	High		1.224	89.9091	110.091	90.6	89.3	109.4	110.7	6.602	0	197.83	20	3051	20
FALSE	High	IsMasterProtein	P68133	Actin, alpha skeletal muscle OS=Homo sapiens GN=ACTA1 PE=1 SV=1	0	182.218	43.5013	13	523	4	1	377	42	5.39	High	High	High	High		1.075	96.3722	103.628	96.7	96.1	103.3	103.9	59.619	0	472.63	13	8204	13
FALSE	High	IsMasterProtein	ch07u_P60709	Actin, cytoplasmic 1 OS=Homo sapiens GN=ACTB PE=1 SV=1	0	848.985	79.7333	21	1477	1	1	375	41.7	5.48	High	High	Peak Found	Peak Found	Acetyl [N-Term]	1.078	96.2475	103.753	96.3	96.2	103.7	103.8	24619.9	0	1897.27	20	34998	21
FALSE	High	IsMasterProtein	P63261	Actin, cytoplasmic 2 OS=Homo sapiens GN=ACTG1 PE=1 SV=1	0	877.46	80	22	1517	2	1	375	41.8	5.48	High	High	High	Peak Found	Acetyl [N-Term; N-Term]	1.006	99.6988	100.301	100.4	99	99.6	101	30077.8	50	1900.28	21	37233	22
FALSE	High	IsMasterProtein	ch10u_O14639	Actin-binding LIM protein 1 OS=Homo sapiens GN=ABLIM1 PE=1 SV=3	0	13.976	3.72751	2	10	2	1	778	87.6	8.59	Peak Found	High	High	High		1.522	79.2872	120.713	79.3		120.7		0.139	0	12.39	2	108	2
FALSE	High	IsMasterProtein	Q562L6	Actin-like protein (Fragment) OS=Homo sapiens GN=ACT PE=4 SV=1	0	106.949	85.4369	4	290	1	1	103	11.5	6.02	Peak Found	Peak Found	High	High		1.594	77.088	122.912	88	66.2	112	133.8	2510.89	0	402.27	4	1851	4
FALSE	High	IsMasterProtein	Q562L3	Actin-like protein (Fragment) OS=Homo sapiens GN=ACT PE=4 SV=1	0	36.309	39.8058	2	56	1	1	103	11.5	6.35	High	High	High	High		1.044	97.8622	102.138	98	97.7	102	102.3	157.489	0	34.71	2	344	2
FALSE	High	IsMasterProtein	Q562L9	Actin-like protein (Fragment) OS=Homo sapiens GN=ACT PE=4 SV=1	0	190.138	81.5534	4	310	1	1	103	11.5	6.52	High	High	High	Peak Found		1.039	98.0904	101.91	97.9	98.3	102.1	101.7	6308.57	0	478.35	4	2715	4
FALSE	Medium	IsMasterProtein	Q562T9	Actin-like protein (Fragment) OS=Homo sapiens GN=ACT PE=4 SV=1	0.027	0.986	11.6505	1	2	1	1	103	11.6	5.03	High	Not Found	Peak Found	Not Found	Acetyl [N-Term]	0.916	104.365	95.6354	104.4		95.6		0.778	0	0	1	0	1
FALSE	High	IsMasterProtein	Q562Z4	Actin-like protein (Fragment) OS=Homo sapiens GN=ACT PE=4 SV=1	0	77.288	74.7573	4	255	2	1	103	11.5	7.58	High	High	Not Found	High		0.869	139.418	121.164	200	78.8		121.2	99	0	364.03	4	1499	2
FALSE	High	IsMasterProtein	Q562V5	Actin-like protein (Fragment) OS=Homo sapiens GN=ACT PE=4 SV=1	0	67.924	46.6019	2	250	1	1	103	11.4	6.35	Not Found	Peak Found	Not Found	High		0.4	142.827	57.1727		142.8		57.2	62.096	0	358.55	2	1377	2
FALSE	Medium	IsMasterProtein	Q562W9	Actin-like protein (Fragment) OS=Homo sapiens GN=ACT PE=4 SV=1	0.014	1.759	29.1262	1	2	1	1	103	11.4	7.12	High	Not Found	Not Found	Not Found	Acetyl [N-Term]	0.01	200		200				3.642	0			0	1
FALSE	High	IsMasterProtein	ch03u_O96019	Actin-like protein 6A OS=Homo sapiens GN=ACTL6A PE=1 SV=1	0	64.976	31.4685	8	30	8	1	429	47.4	5.6	High	High	High	High	Acetyl [N-Term]	1.692	74.3036	125.696	75.1	73.5	124.9	126.5	1.994	0	42.32	7	542	8
FALSE	High	IsMasterProtein	V9GYX7	Actin-related protein 10 (Fragment) OS=Homo sapiens GN=ACTR10 PE=1 SV=1	0	26.257	14.2384	3	9	1	1	302	33.3	5.52	Not Found	High	Not Found	Peak Found		1.171	92.1209	107.879		92.1		107.9	0.719	0	10.94	2	117	3
FALSE	High	IsMasterProtein	ch02i_P61160	Actin-related protein 2 OS=Homo sapiens GN=ACTR2 PE=1 SV=1	0	141.936	24.1117	9	84	9	1	394	44.7	6.74	High	High	High	High		1.482	80.587	119.413	80.7	80.5	119.3	119.5	8.006	0	106.25	9	1798	9
FALSE	High	IsMasterProtein	ch07u_Q92747	Actin-related protein 2/3 complex subunit 1A OS=Homo sapiens GN=ARPC1A PE=1 SV=2	0	174.751	34.5946	8	68	7	1	370	41.5	8.18	High	High	High	High	Acetyl [N-Term]	1.189	91.354	108.646	94.1	88.6	105.9	111.4	5.813	0	112.71	7	1629	8
FALSE	High	IsMasterProtein	O15143	Actin-related protein 2/3 complex subunit 1B OS=Homo sapiens GN=ARPC1B PE=1 SV=3	0	237.837	38.9785	9	128	8	1	372	40.9	8.35	High	High	High	High	Acetyl [N-Term]	1.218	90.1891	109.811	90.7	89.7	109.3	110.3	32.598	1	164.4	8	3739	9
FALSE	High	IsMasterProtein	ch02u_O15144	Actin-related protein 2/3 complex subunit 2 OS=Homo sapiens GN=ARPC2 PE=1 SV=1	0	197.178	49.6667	11	124	11	1	300	34.3	7.36	High	High	High	High		1.189	91.3551	108.645	90.6	92.2	109.4	107.8	19.153	0	173.12	11	2720	11
FALSE	High	IsMasterProtein	B2R4D5	Actin-related protein 2/3 complex subunit 3 OS=Homo sapiens PE=2 SV=1	0	13.376	7.30337	1	10	1	1	178	20.5	8.59	High	Peak Found	High	High		1.456	81.4493	118.551	81.3	81.6	118.7	118.4	0.468	0	13.72	1	341	1
FALSE	High	IsMasterProtein	B3KPC7	Actin-related protein 2/3 complex subunit 5 OS=Homo sapiens PE=2 SV=1	0	67.253	58.8235	5	36	4	1	153	17	6.02	High	High	High	High		1.296	87.1034	112.897	87	87.2	113	112.8	5.579	1	52.02	5	754	5
FALSE	High	IsMasterProtein	ch20i_Q9H9F9	Actin-related protein 5 OS=Homo sapiens GN=ACTR5 PE=1 SV=2	0	12.757	4.77759	2	8	2	1	607	68.3	5.27	Peak Found	Peak Found	High	High		7.915	22.433	177.567	22.1	22.8	177.9	177.2	0.186	0	10.21	2	211	2
FALSE	High	IsMasterProtein	Q59G24	Activated RNA polymerase II transcription cofactor 4 variant (Fragment) OS=Homo sapiens PE=2 SV=1	0	42.759	23.1343	4	45	4	1	134	15.1	9.38	High	High	High	High		1.384	83.892	116.108	84.2	83.6	115.8	116.4	5.579	0	53.38	4	569	4
FALSE	High	IsMasterProtein	Q8N9N2	Activating signal cointegrator 1 complex subunit 1 OS=Homo sapiens GN=ASCC1 PE=1 SV=1	0.005	2.713	2.25	1	2	1	1	400	45.5	5.54	Not Found	Peak Found	Not Found	High		3.258	46.9669	153.033		47		153	0.11	0	1.78	1	32	1
FALSE	High	IsMasterProtein	ch22u_Q9H1I8	Activating signal cointegrator 1 complex subunit 2 OS=Homo sapiens GN=ASCC2 PE=1 SV=3	0	57.069	11.7569	4	22	4	1	757	86.3	5.16	High	High	High	High		1.503	79.8961	120.104	82.4	77.4	117.6	122.6	0.655	0	31.52	4	687	4
FALSE	High	IsMasterProtein	ch06i_Q8N3C0	Activating signal cointegrator 1 complex subunit 3 OS=Homo sapiens GN=ASCC3 PE=1 SV=3	0	77.878	8.85559	12	38	12	1	2202	251.3	7.09	High	High	High	High		2.344	59.8041	140.196	62.5	57.1	137.5	142.9	0.294	0	36.2	12	613	12
FALSE	High	IsMasterProtein	ch15i_Q15650	Activating signal cointegrator 1 OS=Homo sapiens GN=TRIP4 PE=1 SV=4	0	93.991	17.0396	7	34	7	1	581	66.1	7.85	High	High	High	High	Acetyl [N-Term]	2.09	64.7148	135.285	61.2	68.2	138.8	131.8	1.154	0	39.13	6	964	7
FALSE	High	IsMasterProtein	ch14u_O95433	Activator of 90 kDa heat shock protein ATPase homolog 1 OS=Homo sapiens GN=AHSA1 PE=1 SV=1	0	111.046	29.2899	8	68	8	1	338	38.3	5.53	High	High	High	High		1.632	75.9976	124.002	76.5	75.5	123.5	124.5	3.642	0	101.34	8	1694	8
FALSE	High	IsMasterProtein	ch06i_Q9ULW3	Activator of basal transcription 1 OS=Homo sapiens GN=ABT1 PE=1 SV=1	0	12.602	17.6471	3	7	3	1	272	31.1	9.88	Peak Found	Peak Found	High	High		1.493	80.2223	119.778	83.4	77.1	116.6	122.9	0.501	0	4	3	55	3
FALSE	High	IsMasterProtein	A0A1C7CYZ0	Active breakpoint cluster region-related protein OS=Homo sapiens GN=ABR PE=1 SV=1	0	45.425	10.1033	7	32	7	1	871	98.9	6.65	High	High	High	High		2.215	62.2032	137.797	64.4	60	135.6	140	0.571	0	31.28	7	423	7
FALSE	High	IsMasterProtein	O14561	Acyl carrier protein, mitochondrial OS=Homo sapiens GN=NDUFAB1 PE=1 SV=3	0	14.566	9.61538	1	6	1	1	156	17.4	4.93	High	High	Peak Found	High		1.107	94.9283	105.072	91.7	98.2	108.3	101.8	0.585	0	9.81	1	177	1
FALSE	High	IsMasterProtein	ch03i_C9JIF9	Acylamino-acid-releasing enzyme OS=Homo sapiens GN=APEH PE=1 SV=1	0	158.043	25.3731	11	78	11	1	737	81.6	5.54	High	High	High	High		1.207	90.6306	109.369	88.9	92.4	111.1	107.6	2.932	0	114.88	11	1706	11
FALSE	High	IsMasterProtein	ch03u_Q9H845	Acyl-CoA dehydrogenase family member 9, mitochondrial OS=Homo sapiens GN=ACAD9 PE=1 SV=1	0	103.76	21.095	9	62	9	1	621	68.7	7.96	High	High	High	High		0.991	100.45	99.5496	101.8	99.1	98.2	100.9	1.598	0	83.77	9	1070	9
FALSE	High	IsMasterProtein	A1L172	Acyl-CoA thioesterase 1 OS=Homo sapiens GN=ACOT1 PE=2 SV=1	0	67.297	22.0903	8	46	8	1	421	46.3	7.53	High	High	High	High		1.221	90.0591	109.941	90.5	89.6	109.5	110.4	2.455	0	48.88	7	859	8
FALSE	High	IsMasterProtein	Q92604	Acyl-CoA:lysophosphatidylglycerol acyltransferase 1 OS=Homo sapiens GN=LPGAT1 PE=1 SV=1	0	15.941	8.10811	2	6	2	1	370	43.1	8.92	Peak Found	Not Found	High	High		5.3	34.4854	182.757	34.5		165.5	200	0.259	0	6.48	2	179	2
FALSE	High	IsMasterProtein	ch10u_Q8N6N7	Acyl-CoA-binding domain-containing protein 7 OS=Homo sapiens GN=ACBD7 PE=1 SV=1	0	7.447	25	2	3	2	1	88	9.8	6.71	Not Found	High	Not Found	Peak Found	Acetyl [N-Term]	3.593	43.5422	156.458		43.5		156.5	0.931	0	2.13	1	95	2
FALSE	High	IsMasterProtein	ch01i_Q5T4U5	Acyl-Coenzyme A dehydrogenase, C-4 to C-12 straight chain, isoform CRA_a OS=Homo sapiens GN=ACADM PE=1 SV=1	0	59.612	20.2643	6	30	6	1	454	50.2	7.8	High	High	High	High		1.168	92.2398	107.76	94	90.4	106	109.6	1.565	0	38.5	6	686	6
FALSE	High	IsMasterProtein	A0A024R8L7	Acyl-coenzyme A oxidase OS=Homo sapiens GN=ACOX1 PE=3 SV=1	0	136.121	27.4242	11	67	11	1	660	74.6	7.62	High	High	High	High		1.942	67.9901	132.01	68.6	67.4	131.4	132.6	2.472	0	94.93	11	1413	11
FALSE	High	IsMasterProtein	B2R856	Acyl-coenzyme A oxidase OS=Homo sapiens PE=2 SV=1	0	18.897	6	3	7	3	1	700	77.5	7.39	Not Found	High	High	High	Acetyl [N-Term]	0.967	101.687	98.313		101.7		98.3	0.17	0	7.8	2	170	3
FALSE	High	IsMasterProtein	Q9NPJ3	Acyl-coenzyme A thioesterase 13 OS=Homo sapiens GN=ACOT13 PE=1 SV=1	0	14.1	15.7143	2	12	2	1	140	15	9.14	High	High	High	High		0.812	110.378	89.6218	109.2	111.6	90.8	88.4	1.371	0	14.39	2	249	2
FALSE	High	IsMasterProtein	ch01i_Q5T1C6	Acyl-coenzyme A thioesterase THEM4 OS=Homo sapiens GN=THEM4 PE=1 SV=1	0	20.996	10.8333	3	10	3	1	240	27.1	8.28	High	High	Peak Found	High		1.367	84.489	115.511	83.6	85.4	116.4	114.6	1.031	0	10.97	3	118	3
FALSE	High	IsMasterProtein	ch07u_Q53H12	Acylglycerol kinase, mitochondrial OS=Homo sapiens GN=AGK PE=1 SV=2	0	70.414	24.8815	7	28	7	1	422	47.1	8.09	High	High	High	High		0.965	101.787	98.2128	102.9	100.6	97.1	99.4	1.371	0	46.08	7	690	7
FALSE	High	IsMasterProtein	ch14u_P07311	Acylphosphatase-1 OS=Homo sapiens GN=ACYP1 PE=1 SV=2	0	22.454	39.3939	3	16	3	1	99	11.3	9.31	High	High	High	High	Acetyl [N-Term]	1.271	88.0582	111.942	96	80.1	104	119.9	2.162	0	17.46	2	384	3
FALSE	High	IsMasterProtein	A0A024R5U5	ADAM metallopeptidase domain 10, isoform CRA_b OS=Homo sapiens GN=ADAM10 PE=4 SV=1	0	151.294	28.2086	13	74	13	1	748	84.1	7.77	High	High	High	High		2.739	53.4844	146.516	54.3	52.6	145.7	147.4	2.008	0	95.8	13	1395	13
FALSE	High	IsMasterProtein	B2RNB2	ADAM metallopeptidase domain 17 OS=Homo sapiens GN=ADAM17 PE=2 SV=1	0	9.768	5.70388	2	4	2	1	824	93	5.76	Peak Found	Not Found	High	High		3.945	44.9899	177.505	45		155	200	0.089	0	5.61	2	28	2
FALSE	High	IsMasterProtein	ch17i_P46108	Adapter molecule crk OS=Homo sapiens GN=CRK PE=1 SV=2	0	172.62	42.7632	10	106	10	1	304	33.8	5.55	High	High	High	High	Acetyl [N-Term]	1.398	83.418	116.582	83.8	83	116.2	117	26.826	0	135.83	9	2524	10
FALSE	High	IsMasterProtein	ch12u_Q8NC96	Adaptin ear-binding coat-associated protein 1 OS=Homo sapiens GN=NECAP1 PE=1 SV=2	0	12.261	15.2727	3	8	2	1	275	29.7	6.8	Peak Found	Not Found	High	Not Found		2.861	51.8014	148.199	51.8		148.2		0.638	0	5.9	3	122	3
FALSE	High	IsMasterProtein	Q8TEY4	Adaptor protein FE65a2 (Fragment) OS=Homo sapiens GN=APBB1 PE=2 SV=1	0.001	4.486	1.68539	1	2	1	1	712	77.4	5.1	Not Found	Not Found	High	Not Found		100		200			200		0.072	0	0	1	21	1
FALSE	High	IsMasterProtein	Q59EK3	Adaptor-related protein complex 1, mu 1 subunit variant (Fragment) OS=Homo sapiens PE=2 SV=1	0	90.923	28.1116	9	59	9	1	466	53.2	8.88	High	High	High	High		1.546	78.5669	121.433	79.9	77.3	120.1	122.7	2.535	0	73.84	9	784	9
FALSE	High	IsMasterProtein	A0A024RBX8	Adaptor-related protein complex 1, sigma 2 subunit, isoform CRA_d OS=Homo sapiens GN=AP1S2 PE=4 SV=1	0	23.547	12.5628	2	16	2	1	199	22.7	6.77	High	High	High	High		1.695	74.2057	125.794	72.9	75.5	127.1	124.5	1.31	0	20.81	2	475	2
FALSE	High	IsMasterProtein	ch16i_P07741	Adenine phosphoribosyltransferase OS=Homo sapiens GN=APRT PE=1 SV=2	0	104.329	58.3333	7	46	7	1	180	19.6	6.02	High	High	High	High	Acetyl [N-Term]	1.198	90.9932	109.007	90.1	91.9	109.9	108.1	7.483	0	54.26	6	1472	7
FALSE	High	IsMasterProtein	ch20u_P00813	Adenosine deaminase OS=Homo sapiens GN=ADA PE=1 SV=3	0	42.61	17.3554	4	13	4	1	363	40.7	5.95	High	Peak Found	High	High	Acetyl [N-Term]	0.902	105.145	94.8548	102	108.3	98	91.7	1.015	0	15.99	3	326	4
FALSE	High	IsMasterProtein	Q59EC0	Adenosine deaminase, RNA-specific isoform ADAR-a variant (Fragment) OS=Homo sapiens PE=2 SV=1	0	201.755	13.3441	11	103	11	1	1244	137.7	8.48	High	High	High	High		1.458	81.3753	118.625	81	81.7	119	118.3	0.972	0	123.89	11	2645	11
FALSE	High	IsMasterProtein	ch10i_P55263	Adenosine kinase OS=Homo sapiens GN=ADK PE=1 SV=2	0	118.154	22.3757	8	73	8	1	362	40.5	6.7	High	High	High	High		1.223	89.9813	110.019	92.1	87.9	107.9	112.1	4.109	0	94.72	8	1515	8
FALSE	High	IsMasterProtein	ch07u_Q96HN2	Adenosylhomocysteinase 3 OS=Homo sapiens GN=AHCYL2 PE=1 SV=1	0	40.566	9.49264	5	40	1	1	611	66.7	7.36	Not Found	Not Found	High	High		100		200			200	200	0.668	0	43.26	5	407	5
FALSE	High	IsMasterProtein	ch20i_P23526	Adenosylhomocysteinase OS=Homo sapiens GN=AHCY PE=1 SV=4	0	211.942	35.8796	14	239	13	1	432	47.7	6.34	High	High	High	High		1.131	93.8538	106.146	94.4	93.3	105.6	106.7	29.2	1	284.24	14	3733	14
FALSE	High	IsMasterProtein	V5YQL4	Adenosylhomocysteinase OS=Homo sapiens GN=FGFR2-AHCYL1 PE=2 SV=1	0	43.049	6.67237	6	40	2	1	1169	130.8	6.77	Not Found	High	High	Peak Found		4.351	41.2289	179.386		41.2	200	158.8	0.376	2	39.45	6	396	6
FALSE	High	IsMasterProtein	ch12u_O43306	Adenylate cyclase type 6 OS=Homo sapiens GN=ADCY6 PE=1 SV=2	0	5.668	2.73973	2	4	2	1	1168	130.5	8.22	Not Found	Not Found	High	High		100		200			200		0.091	0	1.72	2	72	2
FALSE	High	IsMasterProtein	ch16i_O60503	Adenylate cyclase type 9 OS=Homo sapiens GN=ADCY9 PE=1 SV=4	0	4.922	1.33038	1	2	1	1	1353	150.6	7.34	Not Found	Not Found	Not Found	High		100		200				200	0.032	0	1.66	1	56	1
FALSE	High	IsMasterProtein	ch01i_P54819	Adenylate kinase 2, mitochondrial OS=Homo sapiens GN=AK2 PE=1 SV=2	0	127.718	51.4644	9	77	9	1	239	26.5	7.81	High	High	High	High		1.109	94.8208	105.179	93.8	95.8	106.2	104.2	12.111	0	99.58	8	1668	9
FALSE	High	IsMasterProtein	ch01u_P27144	Adenylate kinase 4, mitochondrial OS=Homo sapiens GN=AK4 PE=1 SV=1	0	22.016	21.0762	2	14	2	1	223	25.3	8.4	High	High	High	High		1.239	89.3072	110.693	88.9	89.7	111.1	110.3	0.848	0	22.74	2	126	2
FALSE	Medium	IsMasterProtein	H0YIY5	Adenylate kinase 7 (Fragment) OS=Homo sapiens GN=AK7 PE=1 SV=1	0.048	0.738	3.94737	1	1	1	1	152	17.8	4.83	High	Not Found	Peak Found	Not Found		1.468	81.0216	118.978	81		119		0.334	0			0	1
FALSE	High	IsMasterProtein	Q5T9B7	Adenylate kinase isoenzyme 1 OS=Homo sapiens GN=AK1 PE=1 SV=1	0	44.883	26.1905	5	26	4	1	210	23.4	8.6	High	High	High	High		1.118	94.4428	105.557	94.6	94.3	105.4	105.7	2.162	1	31.1	5	397	5
FALSE	High	IsMasterProtein	ch01i_Q9Y6K8	Adenylate kinase isoenzyme 5 OS=Homo sapiens GN=AK5 PE=1 SV=2	0	7.242	4.80427	2	4	1	1	562	63.3	5.07	Not Found	Not Found	Not Found	High		100		200				200	0.155	0	2.55	2	35	2
FALSE	High	IsMasterProtein	ch05u_Q9Y3D8	Adenylate kinase isoenzyme 6 OS=Homo sapiens GN=AK6 PE=1 SV=1	0	9.528	29.0698	3	7	3	1	172	20	4.58	Peak Found	Peak Found	High	High		4.281	37.8724	162.128	51.5	24.3	148.5	175.7	0.995	0	6.93	3	68	2
FALSE	High	IsMasterProtein	ch22u_P30566	Adenylosuccinate lyase OS=Homo sapiens GN=ADSL PE=1 SV=2	0	58.478	17.1488	5	32	5	1	484	54.9	7.11	High	High	High	High		1.075	96.4006	103.599	95.1	97.7	104.9	102.3	1.102	0	49.01	5	556	5
FALSE	High	IsMasterProtein	ch01i_P30520	Adenylosuccinate synthetase isozyme 2 OS=Homo sapiens GN=ADSS PE=1 SV=3	0	180.68	33.7719	10	92	10	1	456	50.1	6.55	High	High	High	High	Acetyl [N-Term]	1.283	87.5981	112.402	87.7	87.5	112.3	112.5	6.814	0	78.61	9	2152	10
FALSE	High	IsMasterProtein	ch06u_P40123	Adenylyl cyclase-associated protein 2 OS=Homo sapiens GN=CAP2 PE=1 SV=1	0	25.805	10.2725	4	18	3	1	477	52.8	6.37	High	High	High	High		1.271	88.0645	111.935	87.6	88.6	112.4	111.4	0.562	0	22.86	4	243	4
FALSE	High	IsMasterProtein	D3DPU2	Adenylyl cyclase-associated protein OS=Homo sapiens GN=CAP1 PE=2 SV=1	0	303.194	36.8421	15	245	2	1	475	51.6	8.02	High	High	High	High		1.14	93.4753	106.525	93.7	93.3	106.3	106.7	20.544	19	348.99	15	5667	15
FALSE	High	IsMasterProtein	O95396	Adenylyltransferase and sulfurtransferase MOCS3 OS=Homo sapiens GN=MOCS3 PE=1 SV=1	0	18.477	6.73913	2	10	2	1	460	49.6	6.21	High	High	High	High		1.552	78.3715	121.628	79.3	77.4	120.7	122.6	0.292	0	14.29	2	220	2
FALSE	High	IsMasterProtein	A0A024R127	Adhesion molecule with Ig-like domain 2, isoform CRA_a OS=Homo sapiens GN=AMIGO2 PE=4 SV=1	0.002	3.676	2.87356	1	2	1	1	522	57.9	8.4	Not Found	Not Found	Not Found	Not Found									0.077	0	2.51	1	16	1
FALSE	High	IsMasterProtein	ch20u_Q9HDC9	Adipocyte plasma membrane-associated protein OS=Homo sapiens GN=APMAP PE=1 SV=2	0	174.314	37.2596	12	157	12	1	416	46.5	6.16	High	High	High	High		1.211	90.4443	109.556	90	90.8	110	109.2	27.73	0	188.12	12	1790	12
FALSE	High	IsMasterProtein	P05141	ADP/ATP translocase 2 OS=Homo sapiens GN=SLC25A5 PE=1 SV=7	0	84.759	29.1946	10	79	6	1	298	32.8	9.69	High	High	High	High	Acetyl [N-Term]	0.983	100.847	99.1534	101.1	100.6	98.9	99.4	7.962	4	80.94	9	1269	10
FALSE	High	IsMasterProtein	ch15u_H3BTH4	ADP-dependent glucokinase (Fragment) OS=Homo sapiens GN=ADPGK PE=1 SV=1	0	31.788	61.4035	2	16	1	1	57	6.1	11.22	High	High	High	High		1.339	85.5016	114.498	85.5	85.5	114.5	114.5	20.544	0	18.06	2	494	2
FALSE	High	IsMasterProtein	ch15i_Q9BRR6	ADP-dependent glucokinase OS=Homo sapiens GN=ADPGK PE=1 SV=1	0	60.314	15.0905	4	34	3	1	497	54.1	6.2	High	High	High	High		1.17	92.1507	107.849	92	92.3	108	107.7	1.081	1	48.86	4	1090	4
FALSE	High	IsMasterProtein	P61204	ADP-ribosylation factor 3 OS=Homo sapiens GN=ARF3 PE=1 SV=2	0	159.696	54.6961	8	146	3	1	181	20.6	7.43	High	High	High	High		1.427	82.4152	117.585	82.3	82.6	117.7	117.4	55.234	1	206.08	8	2844	8
FALSE	High	IsMasterProtein	ch03i_U3KQF2	ADP-ribosylation factor 4 OS=Homo sapiens GN=ARF4 PE=1 SV=1	0	9.086	25.3521	3	9	1	1	71	8	4.96	Not Found	High	Not Found	Peak Found		1.695	74.2218	125.778	72.2	76.2	127.8	123.8	5.31	0	4.44	2	70	3
FALSE	High	IsMasterProtein	P18085	ADP-ribosylation factor 4 OS=Homo sapiens GN=ARF4 PE=1 SV=3	0	132.978	52.2222	8	112	2	1	180	20.5	7.14	High	High	High	High		1.78	71.9434	128.057	72.2	71.7	127.8	128.3	19.309	8	165.71	8	2267	8
FALSE	High	IsMasterProtein	ch14u_P62330	ADP-ribosylation factor 6 OS=Homo sapiens GN=ARF6 PE=1 SV=2	0	79.609	51.4286	5	50	5	1	175	20.1	8.95	High	High	High	High		1.662	75.1452	124.855	74.6	75.7	125.4	124.3	15.681	0	64.6	5	940	5
FALSE	High	IsMasterProtein	ch20u_Q8N6T3	ADP-ribosylation factor GTPase-activating protein 1 OS=Homo sapiens GN=ARFGAP1 PE=1 SV=2	0	143.619	32.266	9	74	9	1	406	44.6	5.66	High	High	High	High		1.719	73.5466	126.453	74.4	72.6	125.6	127.4	3.786	0	99.85	9	1894	9
FALSE	High	IsMasterProtein	ch11u_Q8N6H7	ADP-ribosylation factor GTPase-activating protein 2 OS=Homo sapiens GN=ARFGAP2 PE=1 SV=1	0	42.037	11.7083	5	20	5	1	521	56.7	7.99	High	High	High	High	Acetyl [N-Term]	2.657	54.6881	145.312	53.3	56	146.7	144	0.63	0	25.54	4	694	5
FALSE	High	IsMasterProtein	A0A024R7X0	ADP-ribosylation factor guanine nucleotide-exchange factor 1(Brefeldin A-inhibited), isoform CRA_a OS=Homo sapiens GN=ARFGEF1 PE=4 SV=1	0	98.157	7.46349	9	48	7	1	1849	208.6	5.85	High	High	High	High		1.387	83.7943	116.206	82.4	85.2	117.6	114.8	0.42	3	53.46	9	1125	9
FALSE	High	IsMasterProtein	Q9UJY4	ADP-ribosylation factor-binding protein GGA2 OS=Homo sapiens GN=GGA2 PE=1 SV=3	0	24.2	10.9299	4	12	4	1	613	67.1	6.55	Not Found	Peak Found	High	High		100	1.58813	199.206		1.6	200	198.4	0.359	0	17.94	4	205	4
FALSE	High	IsMasterProtein	ch17i_Q9NZ52	ADP-ribosylation factor-binding protein GGA3 OS=Homo sapiens GN=GGA3 PE=1 SV=1	0.001	4.077	1.65975	1	4	1	1	723	78.3	5.58	Peak Found	Not Found	High	High		2.117	64.1579	135.842	64.2		135.8		0.086	0	5.39	1	94	1
FALSE	High	IsMasterProtein	ch12u_F8VYN9	ADP-ribosylation factor-like protein 1 OS=Homo sapiens GN=ARL1 PE=1 SV=1	0	33.89	23.1959	3	20	3	1	194	21.8	6.77	High	High	High	High		1.612	76.5815	123.419	80.8	72.3	119.2	127.7	2.981	0	27.03	3	368	3
FALSE	High	IsMasterProtein	ch11i_P36404	ADP-ribosylation factor-like protein 2 OS=Homo sapiens GN=ARL2 PE=1 SV=4	0	51.483	42.3913	6	30	6	1	184	20.9	6.34	High	High	High	High		3.202	47.6015	152.399	46.8	48.4	153.2	151.6	5.579	0	36.69	6	556	6
FALSE	High	IsMasterProtein	ch10i_P36405	ADP-ribosylation factor-like protein 3 OS=Homo sapiens GN=ARL3 PE=1 SV=2	0	89.418	60.4396	9	52	9	1	182	20.4	7.24	High	High	High	High		1.583	77.4266	122.573	76.4	78.5	123.6	121.5	11.115	0	69.17	9	1036	9
FALSE	High	IsMasterProtein	Q66PJ3	ADP-ribosylation factor-like protein 6-interacting protein 4 OS=Homo sapiens GN=ARL6IP4 PE=1 SV=2	0	60.722	15.9145	5	25	1	1	421	44.9	10.93	High	High	High	High		3.857	41.18	158.82	40.7	41.6	159.3	158.4	1.31	5	28.9	5	536	5
FALSE	High	IsMasterProtein	ch10u_A6NFX8	ADP-sugar pyrophosphatase OS=Homo sapiens GN=NUDT5 PE=1 SV=1	0	102.677	48.2759	8	60	8	1	232	25.9	5.19	High	High	High	High	Acetyl [N-Term]	1.259	88.551	111.449	88.5	88.6	111.5	111.4	13.251	0	92.55	8	874	8
FALSE	High	IsMasterProtein	ch16i_Q96AP0	Adrenocortical dysplasia protein homolog OS=Homo sapiens GN=ACD PE=1 SV=3	0	15.826	5.88235	2	6	2	1	544	57.7	6.74	Peak Found	Peak Found	High	High		4.389	37.1134	162.887	34.6	39.6	165.4	160.4	0.202	0	8.28	2	186	2
FALSE	High	IsMasterProtein	P10109	Adrenodoxin, mitochondrial OS=Homo sapiens GN=FDX1 PE=1 SV=1	0	8.708	12.5	2	6	2	1	184	19.4	5.83	Peak Found	Peak Found	High	High		2.265	61.2581	138.742	60.5	62	139.5	138	0.359	0	6.83	2	58	2
FALSE	High	IsMasterProtein	ch05i_Q9UHB7	AF4/FMR2 family member 4 OS=Homo sapiens GN=AFF4 PE=1 SV=1	0	34.144	5.67498	4	14	4	1	1163	127.4	9.31	Peak Found	Peak Found	High	High		11.844	15.5715	184.429	14.2	16.9	185.8	183.1	0.141	0	15.3	4	339	4
FALSE	High	IsMasterProtein	O43488	Aflatoxin B1 aldehyde reductase member 2 OS=Homo sapiens GN=AKR7A2 PE=1 SV=3	0	60.934	23.9554	5	28	5	1	359	39.6	7.17	High	High	High	High		1.191	91.2702	108.73	91.2	91.4	108.8	108.6	1.637	0	49.8	5	466	5
FALSE	High	IsMasterProtein	ch02u_Q6ULP2	Aftiphilin OS=Homo sapiens GN=AFTPH PE=1 SV=2	0.001	4.562	1.28068	1	2	1	1	937	102.1	4.54	Not Found	Not Found	Not Found	Not Found									0.055	0	2.36	1	50	1
FALSE	High	IsMasterProtein	Q4JM47	AGR2 OS=Homo sapiens GN=AGR2 PE=4 SV=1	0	60.174	32.3077	4	32	3	1	195	22.2	8.76	High	High	High	High		1.077	96.3073	103.693	95.5	97.1	104.5	102.9	3.642	1	37.15	4	796	4
FALSE	High	IsMasterProtein	D7RF68	AGTRAP-BRAF fusion protein OS=Homo sapiens PE=2 SV=1	0	42.814	8.37521	3	18	2	1	597	66.2	8.9	High	High	High	High		1.472	80.892	119.108	80.6	81.2	119.4	118.8	0.417	0	27.3	3	480	3
FALSE	High	IsMasterProtein	Q9BVU3	AHNAK protein OS=Homo sapiens GN=AHNAK PE=2 SV=1	0	67.02	36.6667	3	37	1	1	150	16.2	5.27	Not Found	Not Found	Not Found	Not Found									12.895	0	54.14	3	1190	3
FALSE	High	IsMasterProtein	O43572	A-kinase anchor protein 10, mitochondrial OS=Homo sapiens GN=AKAP10 PE=1 SV=2	0	26.131	6.49547	3	14	3	1	662	73.8	6.39	High	High	High	High		3.77	41.9328	158.067	42.4	41.5	157.6	158.5	0.365	0	16.72	3	190	3
FALSE	High	IsMasterProtein	Q9UKA4	A-kinase anchor protein 11 OS=Homo sapiens GN=AKAP11 PE=1 SV=1	0	10.829	1.26249	2	4	2	1	1901	210.4	5.39	Not Found	Not Found	Not Found	High		100		200				200	0.048	0	3	2	60	2
FALSE	High	IsMasterProtein	ch06i_Q02952	A-kinase anchor protein 12 OS=Homo sapiens GN=AKAP12 PE=1 SV=4	0	854.119	40.9091	47	366	24	1	1782	191.4	4.41	High	High	High	High		2.196	62.5718	137.428	62.7	62.4	137.3	137.6	10.288	26	527.72	47	8804	47
FALSE	High	IsMasterProtein	chXi_Q02040	A-kinase anchor protein 17A OS=Homo sapiens GN=AKAP17A PE=1 SV=2	0	21.114	5.89928	2	10	2	1	695	80.7	9.73	High	High	High	High	Acetyl [N-Term]	0.413	141.555	58.4451	141.2	142	58.8	58	0.199	0	1.88	1	241	2
FALSE	High	IsMasterProtein	ch19u_O43823	A-kinase anchor protein 8 OS=Homo sapiens GN=AKAP8 PE=1 SV=1	0	71.94	13.5838	5	30	5	1	692	76.1	5.15	High	High	High	High		1.58	77.5318	122.468	75.1	79.9	124.9	120.1	0.951	0	32.67	5	681	5
FALSE	High	IsMasterProtein	ch19i_Q9ULX6	A-kinase anchor protein 8-like OS=Homo sapiens GN=AKAP8L PE=1 SV=3	0	11.234	2.01238	1	8	1	1	646	71.6	5.07	High	High	High	High		2.133	63.8448	136.155	61	66.7	139	133.3	0.166	0	9.92	1	141	1
FALSE	High	IsMasterProtein	ch16u_P49588	Alanine--tRNA ligase, cytoplasmic OS=Homo sapiens GN=AARS PE=1 SV=2	0	346.862	33.9876	21	219	21	1	968	106.7	5.53	High	High	High	High		1.824	70.8219	129.178	71.1	70.5	128.9	129.5	5.996	0	299.07	21	4745	21
FALSE	High	IsMasterProtein	ch06i_Q5JTZ9	Alanine--tRNA ligase, mitochondrial OS=Homo sapiens GN=AARS2 PE=1 SV=1	0	75.82	15.6345	9	31	9	1	985	107.3	6.27	High	High	High	High		1.702	74.0232	125.977	72	76	128	124	0.548	0	42.71	9	776	8
FALSE	High	IsMasterProtein	ch17i_Q9BTE6	Alanyl-tRNA editing protein Aarsd1 OS=Homo sapiens GN=AARSD1 PE=1 SV=2	0	106.58	31.3107	7	58	7	1	412	45.5	6.42	High	High	High	High		2.063	65.2925	134.707	65.3	65.3	134.7	134.7	2.311	0	87.28	7	1447	7
FALSE	High	IsMasterProtein	P14550	Alcohol dehydrogenase [NADP(+)] OS=Homo sapiens GN=AKR1A1 PE=1 SV=3	0	131.379	33.8462	7	60	6	1	325	36.6	6.79	High	High	High	High	Acetyl [N-Term]	1.248	88.9642	111.036	88.8	89.1	111.2	110.9	4.109	0	89.13	6	1481	7
FALSE	High	IsMasterProtein	ch04u_P11766	Alcohol dehydrogenase class-3 OS=Homo sapiens GN=ADH5 PE=1 SV=4	0	174.282	37.4332	9	92	9	1	374	39.7	7.49	High	High	High	High		1.138	93.527	106.473	93.3	93.7	106.7	106.3	9	0	134.46	9	1946	9
FALSE	High	IsMasterProtein	ch19u_Q8IZ83	Aldehyde dehydrogenase family 16 member A1 OS=Homo sapiens GN=ALDH16A1 PE=1 SV=2	0	150.521	18.4539	7	73	7	1	802	85.1	6.79	High	High	High	High		1.192	91.2483	108.752	92.7	89.8	107.3	110.2	3.037	0	76.78	7	1460	7
FALSE	High	IsMasterProtein	P43353	Aldehyde dehydrogenase family 3 member B1 OS=Homo sapiens GN=ALDH3B1 PE=1 SV=1	0	94.845	27.3504	8	69	7	1	468	51.8	7.62	High	High	High	High		5.011	33.2704	166.73	33	33.5	167	166.5	2.775	0	86.87	8	1523	8
FALSE	High	IsMasterProtein	B3KSJ6	Aldehyde dehydrogenase OS=Homo sapiens PE=2 SV=1	0	267.837	35.25	12	206	2	1	400	44.2	7.4	High	Not Found	Peak Found	Not Found		0.459	137.057	62.9435	137.1		62.9		99	0	280.26	12	3841	12
FALSE	High	IsMasterProtein	P30837	Aldehyde dehydrogenase X, mitochondrial OS=Homo sapiens GN=ALDH1B1 PE=1 SV=3	0	226.023	30.5609	13	94	12	1	517	57.2	6.8	High	High	High	High		0.958	102.171	97.8293	101.5	102.9	98.5	97.1	6.279	1	160.75	13	2355	13
FALSE	High	IsMasterProtein	ch17i_A8MYB8	Aldehyde dehydrogenase, dimeric NADP-preferring OS=Homo sapiens GN=ALDH3A1 PE=1 SV=1	0	345.756	46.7866	14	268	1	1	389	43.3	6.62	High	High	Peak Found	High		1.113	94.6486	105.351	91.2	98.1	108.8	101.9	214.443	0	373.18	14	5213	14
FALSE	High	IsMasterProtein	ch12i_P05091	Aldehyde dehydrogenase, mitochondrial OS=Homo sapiens GN=ALDH2 PE=1 SV=2	0	237.103	33.2689	13	136	12	1	517	56.3	7.05	High	High	High	High		1.124	94.1465	105.854	93.8	94.5	106.2	105.5	11.798	0	200.78	13	3086	13
FALSE	Medium	IsMasterProtein	ch02i_H7C3Q1	Aldehyde oxidase (Fragment) OS=Homo sapiens GN=AOX1 PE=1 SV=1	0.03	0.888	6.31579	1	2	1	1	190	20.8	6.19	Not Found	Peak Found	High	High		2.733	53.5692	146.431		53.6		146.4	0.292	0	0	1
FALSE	High	IsMasterProtein	Q6PKA6	ALDH3A1 protein (Fragment) OS=Homo sapiens GN=ALDH3A1 PE=2 SV=1	0	357.108	39.2578	14	272	1	1	512	57.5	7.28	High	High	Peak Found	Peak Found		0.914	104.475	95.5249	104.6	104.3	95.4	95.7	75.668	23	382.43	14	5301	14
FALSE	High	IsMasterProtein	O60218	Aldo-keto reductase family 1 member B10 OS=Homo sapiens GN=AKR1B10 PE=1 SV=2	0	658.107	72.7848	18	834	18	1	316	36	7.84	High	High	High	High	Acetyl [N-Term]	0.957	102.204	97.7956	102.2	102.2	97.8	97.8	17301	0	1105.44	17	14618	18
FALSE	High	IsMasterProtein	Q04828	Aldo-keto reductase family 1 member C1 OS=Homo sapiens GN=AKR1C1 PE=1 SV=1	0	564.093	78.6378	19	501	2	1	323	36.8	7.88	High	High	High	High		1.161	92.5402	107.46	92.3	92.8	107.7	107.2	3897.6	35	658.06	19	7848	19
FALSE	High	IsMasterProtein	ch10u_P52895	Aldo-keto reductase family 1 member C2 OS=Homo sapiens GN=AKR1C2 PE=1 SV=3	0	483.231	70.2786	17	492	3	1	323	36.7	7.49	High	High	High	High		1.141	93.404	106.596	93.3	93.5	106.7	106.5	3339.49	0	598.05	17	6205	17
FALSE	High	IsMasterProtein	ch10u_A0A0A0MSS8	Aldo-keto reductase family 1 member C3 OS=Homo sapiens GN=AKR1C3 PE=1 SV=1	0	547.347	78.9474	17	429	3	1	323	36.8	7.94	High	High	High	High		1.095	95.4619	104.538	95.5	95.4	104.5	104.6	2309.13	14	631.06	17	7519	16
FALSE	High	IsMasterProtein	ch02u_Q96C23	Aldose 1-epimerase OS=Homo sapiens GN=GALM PE=1 SV=1	0	59.37	26.9006	6	31	6	1	342	37.7	6.65	High	High	High	High		1.086	95.875	104.125	93.2	98.5	106.8	101.5	2.36	0	41.02	6	583	5
FALSE	High	IsMasterProtein	P15121	Aldose reductase OS=Homo sapiens GN=AKR1B1 PE=1 SV=3	0	410.58	64.2405	13	480	12	1	316	35.8	6.98	High	High	High	High		1.224	89.9123	110.088	90	89.8	110	110.2	414.956	2	686.49	13	9118	13
FALSE	High	IsMasterProtein	ch02u_O00116	Alkyldihydroxyacetonephosphate synthase, peroxisomal OS=Homo sapiens GN=AGPS PE=1 SV=1	0	295.383	42.5532	18	122	18	1	658	72.9	7.34	High	High	High	High	Acetyl [N-Term]	1.382	83.95	116.05	83.1	84.8	116.9	115.2	7.377	0	190.72	17	3236	18
FALSE	High	IsMasterProtein	ch02u_Q6NUM9	All-trans-retinol 13,14-reductase OS=Homo sapiens GN=RETSAT PE=1 SV=2	0	44.978	12.623	5	26	5	1	610	66.8	8.28	High	High	High	High		3.524	44.2116	155.788	45.8	42.7	154.2	157.3	0.546	0	39.9	5	640	5
FALSE	High	IsMasterProtein	ch15i_Q6PD74	Alpha- and gamma-adaptin-binding protein p34 OS=Homo sapiens GN=AAGAB PE=1 SV=1	0	54.201	29.5238	4	27	4	1	315	34.6	4.64	High	High	High	High		2.946	50.6857	149.314	52	49.4	148	150.6	1.929	0	25.1	4	350	4
FALSE	High	IsMasterProtein	Q9NQT3	Alpha one globin (Fragment) OS=Homo sapiens GN=HBA1 PE=2 SV=1	0	12.426	56.044	3	161	1	1	91	9.6	8.24	Not Found	Not Found	Not Found	Not Found									5.31	0	173.7	3	2242	3
FALSE	High	IsMasterProtein	ch09i_Q9H553	Alpha-1,3/1,6-mannosyltransferase ALG2 OS=Homo sapiens GN=ALG2 PE=1 SV=1	0	9.694	9.13462	2	4	2	1	416	47.1	7.05	Not Found	Not Found	High	High		100		200			200		0.259	0	4.93	2	37	2
FALSE	High	IsMasterProtein	B3KQL8	Alpha-1,3-glucosyltransferase OS=Homo sapiens PE=2 SV=1	0	6.241	2.6616	1	4	1	1	526	60.1	9.14	Not Found	Peak Found	High	High		2.595	64.6192	167.69		64.6	200	135.4	0.11	0	5.84	1	70	1
FALSE	High	IsMasterProtein	Q59GM9	Alpha-1,4 glucan phosphorylase (Fragment) OS=Homo sapiens PE=2 SV=1	0	458.861	33.9884	23	305	2	1	865	98.8	6.96	High	High	High	High		1.107	94.915	105.085	94.6	95.2	105.4	104.8	11.743	38	401.74	23	7280	23
FALSE	High	IsMasterProtein	H9KV75	Alpha-actinin-1 OS=Homo sapiens GN=ACTN1 PE=1 SV=1	0	660.887	50.6083	36	954	2	1	822	94.8	5.69	High	High	High	High		1.14	93.4641	106.536	92.5	94.5	107.5	105.5	55.805	0	920.18	35	17788	36
FALSE	High	IsMasterProtein	ch14i_P12814	Alpha-actinin-1 OS=Homo sapiens GN=ACTN1 PE=1 SV=2	0	813.168	54.4843	42	1047	6	1	892	103	5.41	High	High	High	High		1.265	88.2974	111.703	88.2	88.4	111.8	111.6	99	38	1071.39	42	19441	42
FALSE	High	IsMasterProtein	O43707	Alpha-actinin-4 OS=Homo sapiens GN=ACTN4 PE=1 SV=2	0	1529.03	61.3611	52	1895	38	1	911	104.8	5.44	High	High	High	High		1.174	91.9836	108.016	92.1	91.9	107.9	108.1	2492.59	27	2321.8	52	37123	52
FALSE	High	IsMasterProtein	ch10u_P61163	Alpha-centractin OS=Homo sapiens GN=ACTR1A PE=1 SV=1	0	143.417	34.8404	9	58	6	1	376	42.6	6.64	High	High	High	High	Acetyl [N-Term]	1.226	89.8315	110.168	90.1	89.6	109.9	110.4	4.484	2	91.19	9	1429	9
FALSE	High	IsMasterProtein	Q5T5H1	Alpha-endosulfine OS=Homo sapiens GN=ENSA PE=1 SV=1	0	39.605	27.2727	4	18	3	1	187	21	7.87	High	High	High	High	Acetyl [N-Term]	2.435	58.2255	141.774	55.6	60.8	144.4	139.2	2.831	0	11.04	2	421	4
FALSE	High	IsMasterProtein	P06733	Alpha-enolase OS=Homo sapiens GN=ENO1 PE=1 SV=2	0	737.807	65.6682	23	1083	12	1	434	47.1	7.39	High	High	High	High		1.084	95.9756	104.024	95.9	96	104.1	104	787.046	26	1475.31	23	27648	23
FALSE	High	IsMasterProtein	chXu_P06280	Alpha-galactosidase A OS=Homo sapiens GN=GLA PE=1 SV=1	0	36.108	12.1212	3	19	3	1	429	48.7	5.6	High	High	High	High		1.834	70.5718	129.428	70	71.2	130	128.8	0.638	0	30.41	2	569	3
FALSE	High	IsMasterProtein	Q12800	Alpha-globin transcription factor CP2 OS=Homo sapiens GN=TFCP2 PE=1 SV=2	0	36.693	9.96016	4	14	3	1	502	57.2	5.8	Peak Found	High	High	Not Found		2.624	55.1862	144.814	55.2		144.8		0.616	0	21.61	4	336	4
FALSE	High	IsMasterProtein	Q16352	Alpha-internexin OS=Homo sapiens GN=INA PE=1 SV=2	0	40.043	14.0281	5	37	4	1	499	55.4	5.4	High	High	High	High		2.873	51.6438	148.356	53.7	49.6	146.3	150.4	0.645	0	35.84	5	503	5
FALSE	High	IsMasterProtein	Q9NXW9	Alpha-ketoglutarate-dependent dioxygenase alkB homolog 4 OS=Homo sapiens GN=ALKBH4 PE=1 SV=1	0	9.432	9.27152	1	2	1	1	302	33.8	6.67	Not Found	Peak Found	Not Found	High		8.336	21.4222	178.578		21.4		178.6	0.136	0	3.25	1	70	1
FALSE	High	IsMasterProtein	A0A1B0GVH5	Alpha-ketoglutarate-dependent dioxygenase FTO OS=Homo sapiens GN=FTO PE=1 SV=1	0	89.576	22.3614	9	43	9	1	559	64.1	5.38	High	High	High	High		2.665	54.5691	145.431	54	55.1	146	144.9	1.352	0	52.29	9	869	9
FALSE	High	IsMasterProtein	ch05i_Q16706	Alpha-mannosidase 2 OS=Homo sapiens GN=MAN2A1 PE=1 SV=2	0	9.325	1.57343	1	3	1	1	1144	131.1	7.58	Peak Found	High	High	Peak Found		4.116	39.0935	160.906	39.3	38.9	160.7	161.1	0.08	0	2.91	1	30	1
FALSE	High	IsMasterProtein	A8K6A7	Alpha-mannosidase OS=Homo sapiens PE=2 SV=1	0	14.622	3.26409	2	8	2	1	1011	113.7	7.28	High	High	High	High		1.317	86.3328	113.667	78.7	93.9	121.3	106.1	0.083	0	11.36	2	188	2
FALSE	High	IsMasterProtein	ch17i_P54802	Alpha-N-acetylglucosaminidase OS=Homo sapiens GN=NAGLU PE=1 SV=2	0	24.75	5.1144	2	12	2	1	743	82.2	6.65	High	High	High	High		1.295	87.1549	112.845	95.3	79	104.7	121	0.259	0	6.79	2	257	2
FALSE	High	IsMasterProtein	J3KNQ4	Alpha-parvin OS=Homo sapiens GN=PARVA PE=1 SV=1	0	92.462	20.3883	7	50	6	1	412	46.6	8.4	High	High	High	High		1.715	73.6682	126.332	75.3	72	124.7	128	2.675	2	76.17	7	1127	7
FALSE	High	IsMasterProtein	ch19u_P54920	Alpha-soluble NSF attachment protein OS=Homo sapiens GN=NAPA PE=1 SV=3	0	172.009	35.9322	8	90	8	1	295	33.2	5.36	High	High	High	High		2.227	61.9735	138.027	61.5	62.5	138.5	137.5	7.962	0	143.28	8	2251	8
FALSE	High	IsMasterProtein	ch01i_P40222	Alpha-taxilin OS=Homo sapiens GN=TXLNA PE=1 SV=3	0	126.432	29.6703	9	60	9	1	546	61.9	6.52	High	High	High	High		2.481	57.4548	142.545	56.6	58.3	143.4	141.7	1.955	0	71.3	9	1584	9
FALSE	High	IsMasterProtein	ch20u_Q9BTX7	Alpha-tocopherol transfer protein-like OS=Homo sapiens GN=TTPAL PE=1 SV=2	0	5.199	4.67836	1	2	1	1	342	38.5	6.44	Not Found	Not Found	Not Found	High		100		200				200	0.116	0	1.7	1	41	1
FALSE	High	IsMasterProtein	ch02u_A0A087WZY3	Alstrom syndrome protein 1 OS=Homo sapiens GN=ALMS1 PE=1 SV=1	0	7.037	0.863724	2	6	2	1	4168	460.8	6.28	Not Found	Not Found	High	High		100		200			200	200	0.02	0	5.84	2	117	2
FALSE	High	IsMasterProtein	ch02i_L0R819	Alternative protein ASNSD1 OS=Homo sapiens GN=ASNSD1 PE=1 SV=1	0	11.134	21.875	2	10	2	1	96	11.2	8.88	Peak Found	Peak Found	High	High		1.939	68.0613	131.939	83.6	52.6	116.4	147.4	1.683	0	9.95	2	108	2
FALSE	High	IsMasterProtein	L0R588	Alternative protein C11orf48 OS=Homo sapiens GN=C11orf48 PE=4 SV=1	0	29.411	16.3522	2	12	2	1	159	18.4	11.3	High	High	High	High		4.097	39.2382	160.762	38.6	39.9	161.4	160.1	1.783	0	16.06	2	279	2
FALSE	High	IsMasterProtein	L0R849	Alternative protein EDARADD OS=Homo sapiens GN=EDARADD PE=3 SV=1	0	19.264	10.3093	4	63	1	1	388	42.3	5.92	High	High	High	High		1.067	96.737	103.263	95.2	98.3	104.8	101.7	0.701	0	41.1	4	256	4
FALSE	Medium	IsMasterProtein	Q8WYU1	Alternative protein LOC100294362 OS=Homo sapiens GN=pp7201 PE=2 SV=1	0.039	0.768	12.1212	1	2	1	1	165	17.7	6.68	Not Found	Not Found	High	Not Found		100		200			200		0.389	0	0	1	0	1
FALSE	High	IsMasterProtein	ch20u_Q9HB66	Alternative protein MKKS OS=Homo sapiens GN=MKKS PE=1 SV=1	0	19.99	41.2698	2	22	2	1	63	7.3	9.61	High	High	High	High		1.153	92.8776	107.122	92.1	93.6	107.9	106.4	9	0	16.87	2	267	2
FALSE	Medium	IsMasterProtein	L8EA60	Alternative protein SLC17A7 OS=Homo sapiens GN=SLC17A7 PE=4 SV=1	0.014	1.68	31.4815	1	4	1	1	54	6.2	7.12	High	High	Not Found	Not Found	Acetyl [N-Term]	0.01	200		200	200			0.778	0			0	1
FALSE	High	IsMasterProtein	L0R6Q1	Alternative protein SLC35A4 OS=Homo sapiens GN=SLC35A4 PE=1 SV=1	0.002	3.532	29.1262	2	7	2	1	103	11.1	8.1	High	Peak Found	High	High		1.632	75.9898	124.01	67.1	84.9	132.9	115.1	2.162	0	0	2	17	1
FALSE	High	IsMasterProtein	ch04u_Q06203	Amidophosphoribosyltransferase OS=Homo sapiens GN=PPAT PE=1 SV=1	0	116.626	29.4004	10	64	10	1	517	57.4	6.76	High	High	High	High		1.322	86.1293	113.871	86.2	86	113.8	114	3.299	0	73.3	10	977	10
FALSE	Medium	IsMasterProtein	ch17u_K7EIK5	Amine oxidase (Fragment) OS=Homo sapiens GN=AOC3 PE=1 SV=1	0.022	1.195	13.1944	1	2	1	1	144	15.2	6.51	High	Not Found	Not Found	Not Found		0.01	200		200				0.389	0	2.12	1	15	1
FALSE	High	IsMasterProtein	Q59ES3	Amino acid transporter (Fragment) OS=Homo sapiens PE=2 SV=1	0	136.882	19.5255	7	60	1	1	548	57.4	5.38	High	High	High	High		3.324	46.2496	153.75	45.4	47	154.6	153	3.806	10	84.27	7	2147	7
FALSE	High	IsMasterProtein	B2R7N6	Amino acid transporter OS=Homo sapiens PE=2 SV=1	0	19.137	7.14286	2	6	2	1	532	55.7	6.25	Peak Found	High	High	High		3.071	49.1298	150.87	53	45.2	147	154.8	0.245	0	10.98	2	182	2
FALSE	High	IsMasterProtein	ch01u_Q9H4A4	Aminopeptidase B OS=Homo sapiens GN=RNPEP PE=1 SV=2	0	265.763	36.7692	18	136	18	1	650	72.5	5.74	High	High	High	High		1.107	94.9011	105.099	94.9	94.9	105.1	105.1	10.365	0	178.38	18	2350	18
FALSE	High	IsMasterProtein	K7ELE3	Amino-terminal enhancer of split (Fragment) OS=Homo sapiens GN=AES PE=1 SV=1	0.001	4.483	6.06061	1	3	1	1	264	28.7	10.46	Not Found	Not Found	High	High		100		200			200	200	0.129	0	0	1	22	1
FALSE	High	IsMasterProtein	ch02i_Q6DCA0	AMMECR1-like protein OS=Homo sapiens GN=AMMECR1L PE=1 SV=1	0	20.417	16.4516	2	8	2	1	310	34.5	8.98	Peak Found	Peak Found	High	High		17.294	10.9327	189.067	11.1	10.8	188.9	189.2	0.311	0	9.96	2	194	2
FALSE	High	IsMasterProtein	A0MZF5	AMP-activated alpha 2 subunit OS=Homo sapiens GN=PRKAA2 PE=2 SV=1	0	20.473	4.8913	2	14	1	1	552	62.3	7.61	Peak Found	Not Found	High	Not Found		1.952	67.7539	132.246	67.8		132.2		0.233	0	16.2	2	385	2
FALSE	High	IsMasterProtein	A0A0M4G3H8	Amylo-alpha-1, 6-glucosidase, 4-alpha-glucanotransferaseprovided OS=Homo sapiens GN=AGL PE=4 SV=1	0	26.549	4.96084	6	15	6	1	1532	174.7	6.8	High	High	High	High		1.472	80.8913	119.109	99.2	62.6	100.8	137.4	0.147	0	16.36	6	213	6
FALSE	High	IsMasterProtein	ch10u_Q7Z5R6	Amyloid beta A4 precursor protein-binding family B member 1-interacting protein OS=Homo sapiens GN=APBB1IP PE=1 SV=1	0	9.333	3.003	1	2	1	1	666	73.1	5.59	Not Found	Not Found	Not Found	High		100		200				200	0.08	0	2.8	1	81	1
FALSE	High	IsMasterProtein	Q8TCF1	AN1-type zinc finger protein 1 OS=Homo sapiens GN=ZFAND1 PE=1 SV=1	0	6.308	5.59701	1	2	1	1	268	30.8	7.39	Not Found	Not Found	Not Found	Not Found	Acetyl [N-Term]								0.129	0			93	1
FALSE	High	IsMasterProtein	Q6FIF0	AN1-type zinc finger protein 6 OS=Homo sapiens GN=ZFAND6 PE=1 SV=2	0	22.506	16.3462	2	12	2	1	208	22.5	7.2	Not Found	Not Found	High	High		100		200			200	200	0.995	0	15.96	2	318	2
FALSE	High	IsMasterProtein	Q6FI81	Anamorsin OS=Homo sapiens GN=CIAPIN1 PE=1 SV=2	0	85.185	32.3718	8	45	8	1	312	33.6	5.62	High	High	High	High	Acetyl [N-Term]	2.129	63.9167	136.083	64.8	63.1	135.2	136.9	3.642	0	58.95	7	873	8
FALSE	High	IsMasterProtein	A8K3Z6	Anaphase promoting complex subunit 13, isoform CRA_a OS=Homo sapiens GN=ANAPC13 PE=1 SV=1	0.002	3.187	13.5135	1	2	1	1	74	8.5	4.18	Peak Found	Not Found	High	Not Found		1.702	74.0211	125.979	74		126		0.778	0	1.8	1	38	1
FALSE	High	IsMasterProtein	A5D8X2	Anaphase promoting complex subunit 7 OS=Homo sapiens GN=ANAPC7 PE=2 SV=1	0	69.084	17.3451	6	34	6	1	565	63.1	5.72	High	High	High	High	Acetyl [N-Term]	2.48	57.4711	142.529	57.9	57.1	142.1	142.9	0.911	0	46.19	6	839	6
FALSE	High	IsMasterProtein	Q9H1A4	Anaphase-promoting complex subunit 1 OS=Homo sapiens GN=ANAPC1 PE=1 SV=1	0	57.115	5.70988	6	32	6	1	1944	216.4	6.3	High	High	High	High		1.675	74.7582	125.242	75.3	74.2	124.7	125.8	0.166	0	41.53	6	872	6
FALSE	High	IsMasterProtein	ch10i_Q96DE5	Anaphase-promoting complex subunit 16 OS=Homo sapiens GN=ANAPC16 PE=1 SV=1	0	9.616	12.7273	1	4	1	1	110	11.7	4.97	Peak Found	Peak Found	High	High		6.551	26.4867	173.513	25.2	27.7	174.8	172.3	0.389	0	5.45	1	184	1
FALSE	High	IsMasterProtein	ch09i_Q9UJX6	Anaphase-promoting complex subunit 2 OS=Homo sapiens GN=ANAPC2 PE=1 SV=1	0	18.993	5.96107	3	8	3	1	822	93.8	5.22	Peak Found	High	High	High		2.735	53.549	146.451		53.5		146.5	0.151	0	10.15	3	164	3
FALSE	High	IsMasterProtein	ch12i_Q9UJX4	Anaphase-promoting complex subunit 5 OS=Homo sapiens GN=ANAPC5 PE=1 SV=2	0	28.184	4.23841	2	12	2	1	755	85	6.87	High	High	High	High		1.413	82.8962	117.104	87.9	77.9	112.1	122.1	0.166	0	23.35	2	384	2
FALSE	High	IsMasterProtein	Q8NHZ8	Anaphase-promoting complex subunit CDC26 OS=Homo sapiens GN=CDC26 PE=1 SV=1	0	10.811	14.1176	2	6	2	1	85	9.8	6.81	High	Peak Found	High	High		1.867	69.771	130.229	69.8		130.2		1.512	0	4.9	2	106	2
FALSE	High	IsMasterProtein	ch02u_Q9Y679	Ancient ubiquitous protein 1 OS=Homo sapiens GN=AUP1 PE=1 SV=1	0	62.943	12.8151	4	38	4	1	476	53	8.09	High	High	High	High		1.314	86.4147	113.585	87.6	85.2	112.4	114.8	1.512	0	52.36	4	864	4
FALSE	High	IsMasterProtein	D2Y6K2	Androgen receptor isoform 1 transcript variant 1 OS=Homo sapiens GN=AR PE=3 SV=1	0	18.389	3.69565	2	9	2	1	920	99.1	6.34	Not Found	Not Found	High	High		100		200			200	200	0.174	0	11.68	2	290	1
FALSE	High	IsMasterProtein	A0A024R6B2	Angel homolog 1 (Drosophila), isoform CRA_b OS=Homo sapiens GN=ANGEL1 PE=4 SV=1	0	6.44	2.23881	1	2	1	1	670	75.2	4.82	Not Found	Peak Found	Not Found	High		6.8	25.6401	174.36		25.6		174.4	0.11	0	2.36	1	61	1
FALSE	High	IsMasterProtein	ch02u_C9JEH3	Angio-associated migratory cell protein OS=Homo sapiens GN=AAMP PE=1 SV=1	0	50.411	16.7816	4	22	4	1	435	46.8	4.42	Peak Found	Peak Found	High	High		19.621	9.69898	190.301	8.9	10.5	191.1	189.5	1.154	0	37.63	4	735	4
FALSE	High	IsMasterProtein	ch05i_Q8N302	Angiogenic factor with G patch and FHA domains 1 OS=Homo sapiens GN=AGGF1 PE=1 SV=2	0	11.263	2.2409	1	6	1	1	714	80.9	5.44	Peak Found	Not Found	High	High		100		200				200	0.141	0	8.58	1	100	1
FALSE	Medium	IsMasterProtein	ch17i_J3QLR4	Angiotensin-converting enzyme (Fragment) OS=Homo sapiens GN=ACE PE=1 SV=1	0.05	0.715	11.7647	1	2	1	1	119	13.1	4.67	High	High	Peak Found	Peak Found	Acetyl [N-Term]	1.694	74.2364	125.764	73.8	74.7	126.2	125.3	0.778	0			0	1
FALSE	High	IsMasterProtein	Q9NQW6	Anillin OS=Homo sapiens GN=ANLN PE=1 SV=2	0	94.333	12.0996	10	46	10	1	1124	124.1	8.07	Peak Found	Peak Found	High	High		48.735	4.02135	195.979	4.8	3.3	195.2	196.7	0.515	0	62.64	10	1103	10
FALSE	High	IsMasterProtein	Q59GF1	Anion exchange protein (Fragment) OS=Homo sapiens PE=2 SV=1	0	40.254	8.03859	8	26	8	1	1244	137.2	6.25	Peak Found	Peak Found	High	High		6.553	26.4782	173.522	32.7	20.3	167.3	179.7	0.405	0	32.96	8	378	8
FALSE	High	IsMasterProtein	ch11i_Q8N961	Ankyrin repeat and BTB/POZ domain-containing protein 2 OS=Homo sapiens GN=ABTB2 PE=2 SV=2	0	17.012	3.90244	2	6	2	1	1025	113.6	6.29	Not Found	Not Found	High	High		100		200			200	200	0.086	0	8.76	2	99	2
FALSE	High	IsMasterProtein	ch12u_A6QL63	Ankyrin repeat and BTB/POZ domain-containing protein BTBD11 OS=Homo sapiens GN=BTBD11 PE=2 SV=3	0	33.744	5.25362	4	14	4	1	1104	120.8	6.83	High	High	High	High		18.231	10.6776	194.661	10.7		189.3	200	0.274	0	18.85	4	302	4
FALSE	High	IsMasterProtein	Q9P2G1	Ankyrin repeat and IBR domain-containing protein 1 OS=Homo sapiens GN=ANKIB1 PE=1 SV=3	0.001	3.688	0.918274	1	2	1	1	1089	121.9	5.11	Peak Found	Not Found	High	Not Found		1.66	75.1871	124.813	75.2		124.8		0.038	0	0	1	24	1
FALSE	High	IsMasterProtein	Q86XL3	Ankyrin repeat and LEM domain-containing protein 2 OS=Homo sapiens GN=ANKLE2 PE=1 SV=4	0	47.31	10.661	6	19	6	1	938	104.1	7.09	Peak Found	Peak Found	High	High		2.806	52.5431	147.457	55.9	49.2	144.1	150.8	0.264	0	20.97	6	381	6
FALSE	High	IsMasterProtein	ch06i_Q92625	Ankyrin repeat and SAM domain-containing protein 1A OS=Homo sapiens GN=ANKS1A PE=1 SV=4	0	20.915	6.43739	4	20	4	1	1134	123	6.38	High	High	High	High		2.107	64.3622	135.638	71.6	57.1	128.4	142.9	0.302	0	0	3	75	3
FALSE	High	IsMasterProtein	ch16i_Q6ZW76	Ankyrin repeat and SAM domain-containing protein 3 OS=Homo sapiens GN=ANKS3 PE=1 SV=1	0	13.953	8.68902	4	10	4	1	656	72	5.45	Peak Found	High	High	High		2.737	53.5214	146.479	56.1	50.9	143.9	149.1	0.274	0	7.89	4	166	4
FALSE	High	IsMasterProtein	ch02u_Q9Y576	Ankyrin repeat and SOCS box protein 1 OS=Homo sapiens GN=ASB1 PE=1 SV=1	0	6.933	4.47761	1	2	1	1	335	37	8.21	Not Found	Not Found	Not Found	High		100		200				200	0.129	0	3.63	1	51	1
FALSE	High	IsMasterProtein	chXu_Q96DX5	Ankyrin repeat and SOCS box protein 9 OS=Homo sapiens GN=ASB9 PE=1 SV=1	0	20.15	9.18367	2	12	2	1	294	31.8	6.98	Peak Found	High	High	High		1.577	77.5953	122.405	76.8	78.4	123.2	121.6	0.931	0	9.99	2	125	2
FALSE	High	IsMasterProtein	Q9H8Y5	Ankyrin repeat and zinc finger domain-containing protein 1 OS=Homo sapiens GN=ANKZF1 PE=1 SV=1	0.009	2.126	1.37741	1	2	1	1	726	80.9	8.41	Not Found	Not Found	High	Not Found		100		200			200		0.055	0	0	1	0	1
FALSE	High	IsMasterProtein	A8IK34	Ankyrin repeat domain 40 OS=Homo sapiens GN=ANKRD40 PE=2 SV=1	0	26.589	13.0435	3	14	3	1	368	41.1	4.97	High	High	High	High		3.647	43.0364	156.964	43.1	42.9	156.9	157.1	0.778	0	21.13	3	237	3
FALSE	High	IsMasterProtein	ch16u_Q6UB99	Ankyrin repeat domain-containing protein 11 OS=Homo sapiens GN=ANKRD11 PE=1 SV=3	0	11.944	1.68982	2	6	2	1	2663	297.7	7.11	Not Found	Peak Found	High	High		10.92	17.5136	191.243		17.5	200	182.5	0.038	0	9.62	2	98	2
FALSE	High	IsMasterProtein	ch12i_Q8IZ07	Ankyrin repeat domain-containing protein 13A OS=Homo sapiens GN=ANKRD13A PE=1 SV=3	0	10.804	6.10169	2	4	2	1	590	67.6	5.02	Peak Found	Not Found	High	High		1.372	106.847	146.576	106.8		93.2	200	0.166	0	5.01	2	51	2
FALSE	High	IsMasterProtein	O75179	Ankyrin repeat domain-containing protein 17 OS=Homo sapiens GN=ANKRD17 PE=1 SV=3	0	137.626	9.06646	16	58	10	1	2603	274.1	6.52	High	Peak Found	High	High		6.567	26.4302	173.57	27	25.8	173	174.2	0.526	6	77.69	16	1151	16
FALSE	High	IsMasterProtein	Q9GZV1	Ankyrin repeat domain-containing protein 2 OS=Homo sapiens GN=ANKRD2 PE=1 SV=3	0	29.578	14.7222	3	17	3	1	360	39.8	6.09	Peak Found	Peak Found	High	High		3.441	45.0342	154.966	47.6	42.4	152.4	157.6	0.65	0	14.96	3	222	3
FALSE	High	IsMasterProtein	ch02i_Q53LP3	Ankyrin repeat domain-containing protein SOWAHC OS=Homo sapiens GN=SOWAHC PE=1 SV=1	0	17.276	3.61905	1	10	1	1	525	55.6	7.03	High	High	High	High		2.396	58.8959	141.104	62.1	55.7	137.9	144.3	0.16	0	10.98	1	304	1
FALSE	High	IsMasterProtein	H0YM50	Annexin (Fragment) OS=Homo sapiens GN=ANXA2 PE=1 SV=1	0	496.867	70.1613	16	618	1	1	248	28.4	5.83	Not Found	Not Found	Not Found	Not Found	Acetyl [N-Term]								9999	0	899.18	15	14296	16
FALSE	High	IsMasterProtein	Q6LES2	Annexin (Fragment) OS=Homo sapiens GN=ANXA4 PE=2 SV=1	0	211.711	49.5327	16	182	15	1	321	36.1	6.13	High	High	High	High		0.99	100.504	99.496	100.5	100.5	99.5	99.5	30.623	1	224.35	16	4079	16
FALSE	High	IsMasterProtein	A0A0S2Z2Z6	Annexin (Fragment) OS=Homo sapiens GN=ANXA6 PE=2 SV=1	0	270.842	34.1753	19	169	2	1	673	75.8	5.6	Peak Found	High	High	High		1.21	90.4984	109.502	90.3	90.7	109.7	109.3	6.586	20	205.75	19	2855	19
FALSE	High	IsMasterProtein	A0A0S2Z377	Annexin (Fragment) OS=Homo sapiens GN=ANXA6 PE=2 SV=1	0	249.819	32.6837	18	169	1	1	667	75.2	5.67	High	Peak Found	High	High		1.134	93.7117	106.288		93.7		106.3	6.244	0	201.52	18	2787	18
FALSE	High	IsMasterProtein	Q59EP1	Annexin (Fragment) OS=Homo sapiens PE=2 SV=1	0	183.753	28.6275	13	104	1	1	510	54.9	7.27	High	High	High	High		1.517	79.4541	120.546	79.9	79	120.1	121	15.876	0	141.27	13	2409	13
FALSE	High	IsMasterProtein	ch09u_P04083	Annexin A1 OS=Homo sapiens GN=ANXA1 PE=1 SV=2	0	626.212	66.474	24	834	24	1	346	38.7	7.02	High	High	High	High	Acetyl [N-Term; N-Term]	1.201	90.8756	109.124	89.9	91.9	110.1	108.1	8029.86	0	1166.6	22	21475	24
FALSE	High	IsMasterProtein	Q9UJ72	Annexin A10 OS=Homo sapiens GN=ANXA10 PE=1 SV=3	0	33.681	19.1358	4	17	4	1	324	37.3	5.33	High	High	High	High		0.914	104.474	95.5259	105.6	103.3	94.4	96.7	0.995	0	16.1	3	329	4
FALSE	High	IsMasterProtein	ch15i_P07355	Annexin A2 OS=Homo sapiens GN=ANXA2 PE=1 SV=2	0	667.323	67.8466	25	996	10	1	339	38.6	7.75	High	High	High	High	Acetyl [N-Term]	1.288	87.4164	112.584	87.2	87.6	112.8	112.4	7497.94	34	1367.5	24	22040	25
FALSE	High	IsMasterProtein	ch04i_P12429	Annexin A3 OS=Homo sapiens GN=ANXA3 PE=1 SV=3	0	155.081	43.6533	14	136	2	1	323	36.4	5.92	High	High	High	High	Acetyl [N-Term]	1.145	93.2585	106.742	93.1	93.4	106.9	106.6	13.678	15	138.64	13	2633	14
FALSE	High	IsMasterProtein	ch10u_Q5VT79	Annexin A8-like protein 1 OS=Homo sapiens GN=ANXA8L1 PE=2 SV=2	0	130.744	44.9541	10	82	10	1	327	36.9	5.78	High	High	High	High		1.639	75.7902	124.21	75.8	75.8	124.2	124.2	5.7	0	117.68	10	1920	10
FALSE	High	IsMasterProtein	Q5T0G8	Annexin OS=Homo sapiens GN=ANXA11 PE=2 SV=1	0	168.232	28.3168	13	100	1	1	505	54.4	7.65	Peak Found	Peak Found	High	High		1.536	78.8745	121.125	78.1	79.6	121.9	120.4	14.199	17	134.63	13	2143	13
FALSE	High	IsMasterProtein	ch04i_D6RA82	Annexin OS=Homo sapiens GN=ANXA3 PE=1 SV=1	0	136.537	44.0141	13	113	1	1	284	32.1	5.94	High	High	Peak Found	Peak Found		1.208	90.5973	109.403	90.5	90.7	109.5	109.3	16.302	0	117.02	12	2232	13
FALSE	High	IsMasterProtein	V9HWE0	Annexin OS=Homo sapiens GN=HEL-S-7 PE=2 SV=1	0	360.305	58.75	16	301	15	1	320	35.9	5.05	High	High	High	High		1.074	96.4391	103.561	95.2	97.7	104.8	102.3	75.668	0	403.49	16	8251	16
FALSE	High	IsMasterProtein	B2R657	Annexin OS=Homo sapiens PE=2 SV=1	0	71.077	26.0246	11	56	11	1	488	52.6	5.52	High	High	High	High		1.553	78.3458	121.654	78.5	78.2	121.5	121.8	4.337	0	57.01	11	802	11
FALSE	High	IsMasterProtein	A8K2L6	Annexin OS=Homo sapiens PE=2 SV=1	0.003	2.908	3.08123	1	2	1	1	357	39.7	5.5	High	Not Found	Not Found	Not Found		0.01	200		200				0.093	0	0	1
FALSE	High	IsMasterProtein	A0A024R2S0	Anoctamin OS=Homo sapiens GN=TMEM16K PE=3 SV=1	0	12.761	4.24242	2	6	2	1	660	76.3	7.4	Peak Found	Peak Found	High	High		1.315	86.3818	113.618	80.2	92.5	119.8	107.5	0.179	0	6.03	2	107	2
FALSE	High	IsMasterProtein	ch07u_H7C040	Anterior gradient protein 3 (Fragment) OS=Homo sapiens GN=AGR3 PE=1 SV=1	0.001	4.056	16.2791	2	5	1	1	129	15	6.3	Not Found	Not Found	Not Found	Not Found	Acetyl [N-Term]								0.668	0	1.86	1	67	2
FALSE	High	IsMasterProtein	ch02i_Q9H6X2	Anthrax toxin receptor 1 OS=Homo sapiens GN=ANTXR1 PE=1 SV=2	0.001	3.797	2.12766	1	2	1	1	564	62.7	7.61	Not Found	Not Found	High	Not Found		100		200			200		0.08	0	2.36	1	39	1
FALSE	High	IsMasterProtein	ch10i_P46013	Antigen KI-67 OS=Homo sapiens GN=MKI67 PE=1 SV=2	0	41.451	3.74693	8	38	8	1	3256	358.5	9.45	High	High	High	High		6.98	25.0612	174.939	23.9	26.2	176.1	173.8	0.128	0	23.41	8	445	8
FALSE	High	IsMasterProtein	A0A140T9T7	Antigen peptide transporter 1 OS=Homo sapiens GN=TAP1 PE=1 SV=1	0	24.219	6.18812	3	11	3	1	808	87.1	8.02	High	High	High	High	Acetyl [N-Term]	2.085	64.8345	135.165	69.2	60.5	130.8	139.5	0.274	0	13.33	2	241	3
FALSE	High	IsMasterProtein	A8K916	AP complex subunit beta OS=Homo sapiens PE=2 SV=1	0	309.352	34.0694	25	207	15	1	951	105.6	5.31	High	High	High	High		1.807	71.2594	128.741	71.7	70.8	128.3	129.2	9.965	12	239.15	25	4440	25
FALSE	High	IsMasterProtein	ch22u_Q10567	AP-1 complex subunit beta-1 OS=Homo sapiens GN=AP1B1 PE=1 SV=2	0	206.592	24.236	18	128	1	1	949	104.6	5.06	High	High	High	High		1.102	95.1338	104.866	96.4	93.9	103.6	106.1	4.495	0	153.82	18	2295	18
FALSE	High	IsMasterProtein	O75843	AP-1 complex subunit gamma-like 2 OS=Homo sapiens GN=AP1G2 PE=1 SV=1	0	17.527	4.07643	2	6	2	1	785	87.1	6.55	Not Found	Not Found	High	High		100		200			200	200	0.108	0	12.94	2	242	2
FALSE	High	IsMasterProtein	H7C1E4	AP-1 complex subunit sigma-1A (Fragment) OS=Homo sapiens GN=AP1S1 PE=1 SV=1	0	21.526	8.37696	1	16	1	1	191	22.2	9.16	High	High	High	High		3.327	46.2194	153.781	46.4	46.1	153.6	153.9	0.52	0	30.36	1	679	1
FALSE	High	IsMasterProtein	A0A024R0X0	AP1 gamma subunit binding protein 1, isoform CRA_d OS=Homo sapiens GN=AP1GBP1 PE=4 SV=1	0	33.166	5.09893	4	16	4	1	1314	140.6	5.03	High	High	High	High		3.429	45.1522	154.848	46.4	43.9	153.6	156.1	0.15	0	23.99	4	560	4
FALSE	High	IsMasterProtein	O95782	AP-2 complex subunit alpha-1 OS=Homo sapiens GN=AP2A1 PE=1 SV=3	0	167.977	22.1085	15	112	11	1	977	107.5	7.03	High	High	High	High		1.238	89.3652	110.635	86.8	91.9	113.2	108.1	1.878	5	142.2	15	1962	15
FALSE	High	IsMasterProtein	O94973	AP-2 complex subunit alpha-2 OS=Homo sapiens GN=AP2A2 PE=1 SV=2	0	183.393	22.0447	13	103	1	1	939	103.9	6.96	High	High	High	High		1.348	85.188	114.812	84.6	85.7	115.4	114.3	1.795	10	149.09	13	1929	13
FALSE	High	IsMasterProtein	A0A096LP25	AP2-associated protein kinase 1 (Fragment) OS=Homo sapiens GN=AAK1 PE=1 SV=1	0	40.42	11.9374	4	24	3	1	511	54.4	5.12	High	High	High	High		0.99	100.519	99.4814	98.9	102.2	101.1	97.8	0.738	0	33.04	4	492	4
FALSE	High	IsMasterProtein	Q2M2I8	AP2-associated protein kinase 1 OS=Homo sapiens GN=AAK1 PE=1 SV=3	0	89.728	11.4464	6	36	5	1	961	103.8	6.6	High	High	High	High		1.477	80.7503	119.25	76.3	85.2	123.7	114.8	0.632	1	58.93	6	964	6
FALSE	High	IsMasterProtein	A8K586	AP-3 complex subunit beta OS=Homo sapiens PE=2 SV=1	0	121.657	19.1042	14	75	14	1	1094	121.2	5.97	High	High	High	High	Acetyl [N-Term]	1.952	67.7479	132.252	67.5	68	132.5	132	1.104	0	79.66	13	1444	14
FALSE	High	IsMasterProtein	ch10u_Q9Y2T2	AP-3 complex subunit mu-1 OS=Homo sapiens GN=AP3M1 PE=1 SV=1	0	88.168	30.3828	8	52	8	1	418	46.9	6.93	High	High	High	High		1.768	72.257	127.743	71.7	72.8	128.3	127.2	3.062	0	65.1	8	848	8
FALSE	High	IsMasterProtein	ch05i_Q92572	AP-3 complex subunit sigma-1 OS=Homo sapiens GN=AP3S1 PE=1 SV=1	0	33.864	27.9793	4	18	4	1	193	21.7	5.39	High	High	High	High		1.265	88.3161	111.684	86.5	90.1	113.5	109.9	2.162	0	19.43	4	372	4
FALSE	High	IsMasterProtein	A0A1B0GV70	AP-4 complex accessory subunit Tepsin OS=Homo sapiens GN=TEPSIN PE=1 SV=1	0	11.83	6.07083	2	4	2	1	593	62	7.34	Not Found	Not Found	High	Not Found									0.166	0	5.61	2	84	2
FALSE	High	IsMasterProtein	ch01u_Q9Y6B7	AP-4 complex subunit beta-1 OS=Homo sapiens GN=AP4B1 PE=1 SV=2	0	9.326	5.00677	2	4	2	1	739	83.2	5.86	Peak Found	Not Found	High	High									0.099	0	6.13	2	42	2
FALSE	Medium	IsMasterProtein	ch15u_Q9UPM8	AP-4 complex subunit epsilon-1 OS=Homo sapiens GN=AP4E1 PE=1 SV=2	0.033	0.839	0.703606	1	2	1	1	1137	127.2	5.99	Peak Found	Not Found	High	Not Found		0.646	121.501	78.4991	121.5		78.5		0.037	0	0	1	17	1
FALSE	High	IsMasterProtein	Q4LE70	APC variant protein (Fragment) OS=Homo sapiens GN=APC variant protein PE=2 SV=1	0	15.471	1.40598	3	6	3	1	2845	311.7	7.84	Peak Found	Peak Found	High	High		1.183	91.6352	108.365	38.8	144.5	161.2	55.5	0.038	0	5.04	3	135	3
FALSE	High	IsMasterProtein	A0A024R3E3	Apolipoprotein A-I, isoform CRA_a OS=Homo sapiens GN=APOA1 PE=3 SV=1	0	8.295	5.99251	1	4	1	1	267	30.8	5.76	High	High	Not Found	Not Found		0.01	200		200	200			0.116	0	6.45	1	142	1
FALSE	High	IsMasterProtein	C0JYY2	Apolipoprotein B (Including Ag(X) antigen) OS=Homo sapiens GN=APOB PE=4 SV=1	0	18.197	1.20535	4	16	4	1	4563	515.2	7.05	High	High	Peak Found	High		0.153	173.528	26.4722	172.6	174.5	27.4	25.5	0.039	0	12.34	4	136	4
FALSE	High	IsMasterProtein	Q59GY0	Apolipoprotein B mRNA editing enzyme, catalytic polypeptide-like 3C variant (Fragment) OS=Homo sapiens PE=2 SV=1	0	14.949	16.0377	2	6	2	1	212	25.2	8.57	Peak Found	Peak Found	High	High		3.483	44.6109	155.389	34.2	55	165.8	145	0.389	0	6.97	2	171	2
FALSE	High	IsMasterProtein	B0YIW2	Apolipoprotein C-III OS=Homo sapiens GN=APOC3 PE=1 SV=1	0	8.167	13.6752	1	4	1	1	117	12.8	8.18	High	High	Not Found	Not Found		0.01	200		200	200			0.334	0	5.5	1	215	1
FALSE	High	IsMasterProtein	Q9BZZ5	Apoptosis inhibitor 5 OS=Homo sapiens GN=API5 PE=1 SV=3	0	116.52	28.4351	14	86	14	1	524	59	7.34	High	High	High	High		1.585	77.379	122.621	75.3	79.5	124.7	120.5	3.85	0	101.7	13	1396	14
FALSE	High	IsMasterProtein	O15304	Apoptosis regulatory protein Siva OS=Homo sapiens GN=SIVA1 PE=1 SV=2	0	11.985	13.1429	1	2	1	1	175	18.7	7.61	Not Found	Not Found	High	Not Found		100		200			200		0.259	0	3.18	1	127	1
FALSE	High	IsMasterProtein	chXi_O95831	Apoptosis-inducing factor 1, mitochondrial OS=Homo sapiens GN=AIFM1 PE=1 SV=1	0	148.852	24.9592	11	97	11	1	613	66.9	8.95	High	High	High	High		0.925	103.889	96.1115	103.7	104.1	96.3	95.9	3.329	0	131.41	11	1844	11
FALSE	High	IsMasterProtein	Q9BRQ8	Apoptosis-inducing factor 2 OS=Homo sapiens GN=AIFM2 PE=1 SV=1	0	24.93	7.23861	2	14	2	1	373	40.5	9.11	High	Peak Found	High	High		2.27	61.1706	138.829	62.7	59.6	137.3	140.4	0.389	0	18.23	2	307	2
FALSE	High	IsMasterProtein	ch14i_S4R3H4	Apoptotic chromatin condensation inducer in the nucleus OS=Homo sapiens GN=ACIN1 PE=1 SV=1	0	252.822	22.2136	16	119	16	1	1283	145.4	6	High	High	High	High	Acetyl [N-Term]	1.339	85.5029	114.497	85.5	85.5	114.5	114.5	1.707	0	140.55	15	2942	16
FALSE	High	IsMasterProtein	ch12u_O14727	Apoptotic protease-activating factor 1 OS=Homo sapiens GN=APAF1 PE=1 SV=2	0.001	4.554	0.961538	1	4	1	1	1248	141.7	6.4	High	High	Peak Found	Peak Found		1.836	70.5198	129.48	70.1	71	129.9	129	0.032	0	3.59	1	63	1
FALSE	High	IsMasterProtein	ch09u_Q7Z2E3	Aprataxin OS=Homo sapiens GN=APTX PE=1 SV=2	0	37.372	12.0787	2	12	2	1	356	40.7	9.17	High	High	High	High		1.463	81.2023	118.798	80.1	82.3	119.9	117.7	0.585	0	20.56	2	304	2
FALSE	High	IsMasterProtein	B0YIW6	Archain 1, isoform CRA_a OS=Homo sapiens GN=ARCN1 PE=1 SV=1	0	78.235	17.5725	10	51	10	1	552	61.6	5.85	High	High	High	High		1.304	86.8149	113.185	86.3	87.3	113.7	112.7	2.282	0	59.75	10	789	10
FALSE	High	IsMasterProtein	ch12u_Q14161	ARF GTPase-activating protein GIT2 OS=Homo sapiens GN=GIT2 PE=1 SV=2	0	45.704	11.1989	4	18	4	1	759	84.5	7.23	High	High	High	High		5.022	33.2126	166.787	34.3	32.2	165.7	167.8	0.379	0	22.28	4	454	4
FALSE	High	IsMasterProtein	P53367	Arfaptin-1 OS=Homo sapiens GN=ARFIP1 PE=1 SV=2	0	92.212	22.5201	5	36	1	1	373	41.7	6.7	High	High	High	High		1.705	73.9506	126.049	73.2	74.7	126.8	125.3	1.346	5	59	5	983	5
FALSE	High	IsMasterProtein	ch03u_Q15057	Arf-GAP with coiled-coil, ANK repeat and PH domain-containing protein 2 OS=Homo sapiens GN=ACAP2 PE=1 SV=3	0	26.408	8.48329	4	13	4	1	778	88	6.8	High	High	High	High		2.403	58.768	141.232	34.8	82.7	165.2	117.3	0.311	0	7.1	4	218	3
FALSE	High	IsMasterProtein	A0A0S2Z462	ArfGAP with FG repeats 1 isoform 2 (Fragment) OS=Homo sapiens GN=AGFG1 PE=2 SV=1	0	148.055	15.9468	6	62	6	1	602	62.6	8.56	High	High	High	High		1.737	73.0761	126.924	72.5	73.6	127.5	126.4	4.623	0	101.48	6	2160	6
FALSE	High	IsMasterProtein	ch11u_Q96P48	Arf-GAP with Rho-GAP domain, ANK repeat and PH domain-containing protein 1 OS=Homo sapiens GN=ARAP1 PE=1 SV=3	0	50.543	5.93103	5	22	5	1	1450	162.1	6.23	High	High	High	High		2.34	59.8745	140.126	55.7	64	144.3	136	0.226	0	36.08	5	453	5
FALSE	High	IsMasterProtein	ch02i_O43150	Arf-GAP with SH3 domain, ANK repeat and PH domain-containing protein 2 OS=Homo sapiens GN=ASAP2 PE=1 SV=3	0	25.2	7.35586	5	15	4	1	1006	111.6	6.68	High	High	High	High		2	66.662	133.338	61.2	72.2	138.8	127.8	0.215	0	16.47	5	237	4
FALSE	Medium	IsMasterProtein	ch13i_Q9NWB6	Arginine and glutamate-rich protein 1 OS=Homo sapiens GN=ARGLU1 PE=1 SV=1	0.031	0.879	2.9304	1	1	1	1	273	33.2	10.35	Not Found	Not Found	High	Not Found		100		200			200		0.166	0	0	1
FALSE	High	IsMasterProtein	ch12i_Q7L4I2	Arginine/serine-rich coiled-coil protein 2 OS=Homo sapiens GN=RSRC2 PE=1 SV=1	0	10.762	3.68664	1	6	1	1	434	50.5	11.33	Peak Found	Peak Found	High	High		3.838	41.338	158.662	43	39.6	157	160.4	0.122	0	9.49	1	231	1
FALSE	High	IsMasterProtein	ch06i_Q8TF01	Arginine/serine-rich protein PNISR OS=Homo sapiens GN=PNISR PE=1 SV=2	0	11.988	1.49068	1	6	1	1	805	92.5	10.02	Peak Found	High	High	High		1.199	90.9637	109.036	91.2	90.7	108.8	109.3	0.194	0	8.03	1	95	1
FALSE	Medium	IsMasterProtein	ch01u_Q9P2R6	Arginine-glutamic acid dipeptide repeats protein OS=Homo sapiens GN=RERE PE=1 SV=2	0.026	1.031	0.63857	1	4	1	1	1566	172.3	7.69	Peak Found	Peak Found	High	High		2.96	50.501	149.499	51	50	149	150	0.041	0	1.72	1	0	1
FALSE	High	IsMasterProtein	ch05i_P54136	Arginine--tRNA ligase, cytoplasmic OS=Homo sapiens GN=RARS PE=1 SV=2	0	370.378	43.4848	25	234	25	1	660	75.3	6.68	High	High	High	High		1.301	86.9125	113.087	85.6	88.2	114.4	111.8	19.06	0	297.27	25	4520	25
FALSE	High	IsMasterProtein	ch07i_Q8N2F6	Armadillo repeat-containing protein 10 OS=Homo sapiens GN=ARMC10 PE=1 SV=1	0	23.073	12.828	3	12	3	1	343	37.5	6.61	High	Peak Found	High	High		0.981	100.941	99.0591	95.9	105.9	104.1	94.1	0.848	0	14.82	3	163	3
FALSE	High	IsMasterProtein	ch19i_Q6NXE6	Armadillo repeat-containing protein 6 OS=Homo sapiens GN=ARMC6 PE=1 SV=2	0	35.858	14.1717	5	18	5	1	501	54.1	6.24	High	High	High	High		2.423	58.4312	141.569	61.5	55.4	138.5	144.6	0.668	0	27.84	5	401	5
FALSE	High	IsMasterProtein	Q9H6L4	Armadillo repeat-containing protein 7 OS=Homo sapiens GN=ARMC7 PE=1 SV=1	0	8.674	10.101	1	4	1	1	198	21.9	6.09	Not Found	Not Found	High	High		100		200			200	200	0.233	0	2.1	1	117	1
FALSE	High	IsMasterProtein	ch03i_Q8IUR7	Armadillo repeat-containing protein 8 OS=Homo sapiens GN=ARMC8 PE=1 SV=2	0	22.143	2.82318	1	6	1	1	673	75.5	6.73	High	Peak Found	High	High		1.445	81.7956	118.204	87.2	76.3	112.8	123.7	0.108	0	9.75	1	193	1
FALSE	High	IsMasterProtein	A0A024RAI1	ARP3 actin-related protein 3 homolog (Yeast), isoform CRA_a OS=Homo sapiens GN=ACTR3 PE=3 SV=1	0	269.886	44.7368	14	193	14	1	418	47.3	5.88	High	High	High	High		1.186	91.4943	108.506	91.9	91.1	108.1	108.9	29.079	0	277.94	14	3581	14
FALSE	High	IsMasterProtein	ch10u_Q9HBK9	Arsenite methyltransferase OS=Homo sapiens GN=AS3MT PE=1 SV=3	0	16.844	10.4	3	8	3	1	375	41.7	6.2	High	High	High	High		1.785	71.8214	128.179	60.7	82.9	139.3	117.1	0.389	0	7.03	3	53	3
FALSE	High	IsMasterProtein	ch01u_P27540	Aryl hydrocarbon receptor nuclear translocator OS=Homo sapiens GN=ARNT PE=1 SV=1	0	8.135	2.28137	1	4	1	1	789	86.6	6.54	Peak Found	Not Found	High	High		5.601	32.7802	183.61	32.8		167.2	200	0.062	0	4.5	1	75	1
FALSE	High	IsMasterProtein	ch07u_P35869	Aryl hydrocarbon receptor OS=Homo sapiens GN=AHR PE=1 SV=2	0	19.796	5.18868	3	9	3	1	848	96.1	6.38	Not Found	Not Found	High	High		100		200			200	200	0.346	0	10.95	3	146	3
FALSE	High	IsMasterProtein	D2CVN5	Aryl hydrocarbon receptor-interacting protein AIP722 OS=Homo sapiens GN=AIP PE=4 SV=1	0	85.708	39.2593	8	54	1	1	270	30.8	6.54	High	High	High	High		1.594	77.1091	122.891	74.8	79.4	125.2	120.6	5.813	0	65.6	8	869	8
FALSE	High	IsMasterProtein	ch08u_F5H5R8	Arylamine N-acetyltransferase 1 OS=Homo sapiens GN=NAT1 PE=1 SV=1	0	9.421	4.82955	1	2	1	1	352	40.8	6.9	Peak Found	Not Found	High	Not Found		3.95	40.4066	159.593	40.4		159.6		0.122	0	3.26	1	55	1
FALSE	Medium	IsMasterProtein	ch02u_Q9BVC5	Ashwin OS=Homo sapiens GN=C2orf49 PE=1 SV=1	0.01	1.984	5.60345	1	2	1	1	232	25.8	9.74	Not Found	Peak Found	Not Found	High		4.045	39.6417	160.358		39.6		160.4	0.155	0	1.91	1	0	1
FALSE	High	IsMasterProtein	P08243	Asparagine synthetase [glutamine-hydrolyzing] OS=Homo sapiens GN=ASNS PE=1 SV=4	0	139.603	25.1337	11	94	2	1	561	64.3	6.86	Peak Found	Peak Found	High	High		3.62	43.2904	156.71	42.7	43.9	157.3	156.1	3.184	15	120.04	11	1529	11
FALSE	High	IsMasterProtein	ch18i_O43776	Asparagine--tRNA ligase, cytoplasmic OS=Homo sapiens GN=NARS PE=1 SV=1	0	234.032	30.1095	13	139	13	1	548	62.9	6.25	High	High	High	High		1.313	86.4624	113.538	86.2	86.7	113.8	113.3	9	0	204.21	11	3642	13
FALSE	High	IsMasterProtein	ch18i_K7ENF0	Asparagine--tRNA ligase, cytoplasmic OS=Homo sapiens GN=NARS PE=1 SV=1	0.001	3.763	19.1489	1	2	1	1	47	5.3	7.96	Not Found	Not Found	Not Found	Not Found									0.778	0			72	1
FALSE	High	IsMasterProtein	A0A024R6W0	Aspartate aminotransferase OS=Homo sapiens GN=GOT2 PE=4 SV=1	0	123.794	32.7907	11	107	11	1	430	47.4	9.01	High	High	High	High		0.982	100.92	99.0804	101.4	100.4	98.6	99.6	5.723	0	139.66	11	1919	11
FALSE	High	IsMasterProtein	ch10i_P17174	Aspartate aminotransferase, cytoplasmic OS=Homo sapiens GN=GOT1 PE=1 SV=3	0	192.187	43.5835	12	97	12	1	413	46.2	7.01	High	High	High	High		1.386	83.8386	116.161	81.5	86.2	118.5	113.8	7.432	0	121.15	11	1995	12
FALSE	High	IsMasterProtein	ch08u_Q12797	Aspartyl/asparaginyl beta-hydroxylase OS=Homo sapiens GN=ASPH PE=1 SV=3	0	267.18	23.6148	14	161	14	1	758	85.8	5.01	High	High	High	High		1.215	90.2824	109.718	90	90.6	110	109.4	8.412	0	212.53	14	2979	14
FALSE	High	IsMasterProtein	A0A024R3R1	AT rich interactive domain 4B (RBP1-like), isoform CRA_d OS=Homo sapiens GN=ARID4B PE=4 SV=1	0	32.512	6.25	5	16	5	1	1312	147.7	5.12	Peak Found	Not Found	High	High		52.555	3.76969	198.115	3.8		196.2	200	0.171	0	21.47	5	338	5
FALSE	High	IsMasterProtein	D2CTA5	Ataxin 2 (Fragment) OS=Homo sapiens PE=4 SV=1	0.008	2.29	100	1	10	1	1	29	3.4	11	High	Not Found	Not Found	Not Found		0.01	200		200				9	0	0	1	0	1
FALSE	High	IsMasterProtein	D3VVP8	Ataxin 3 variant ao (Fragment) OS=Homo sapiens GN=ATXN3 PE=2 SV=1	0	5.954	9.19118	2	10	1	1	272	31.2	4.67	Not Found	Not Found	High	High		100		200			200		0.848	0	1.62	2	19	2
FALSE	High	IsMasterProtein	D3VVL4	Ataxin 3 variant ref (Fragment) OS=Homo sapiens GN=ATXN3 PE=2 SV=1	0	16.197	7.87402	3	13	2	1	381	44.5	4.86	Not Found	Not Found	Not Found	Not Found		2.473	57.5886	142.411	58.8	56.4	141.2	143.6	0.438	1	1.62	1	47	3
FALSE	High	IsMasterProtein	Q59F94	Ataxin-1 ubiquitin-like interacting protein variant (Fragment) OS=Homo sapiens PE=2 SV=1	0	90.32	14.3333	5	50	3	1	600	63.7	5.22	High	High	High	High	Acetyl [N-Term]	1.812	71.1163	128.884	73.4	68.9	126.6	131.1	2.34	0	70.21	5	1448	5
FALSE	High	IsMasterProtein	ch22i_Q9UBB4	Ataxin-10 OS=Homo sapiens GN=ATXN10 PE=1 SV=1	0	170.719	41.2632	15	88	15	1	475	53.5	5.25	High	High	High	High		6.781	25.7042	174.296	25.2	26.2	174.8	173.8	4.52	0	124.16	15	2628	15
FALSE	High	IsMasterProtein	ch16i_P0C7T5	Ataxin-1-like OS=Homo sapiens GN=ATXN1L PE=1 SV=1	0.002	3.111	1.59652	1	2	1	1	689	73.3	6.6	Not Found	High	Not Found	Not Found		0.01	200			200			0.066	0	1.6	1	16	1
FALSE	High	IsMasterProtein	ch12i_Q99700	Ataxin-2 OS=Homo sapiens GN=ATXN2 PE=1 SV=2	0	131.972	15.7654	12	72	12	1	1313	140.2	9.57	High	High	High	High		2.947	50.6685	149.332	54.1	47.2	145.9	152.8	1.512	0	87.35	12	1229	12
FALSE	Medium	IsMasterProtein	Q5TGY3	AT-hook DNA-binding motif-containing protein 1 OS=Homo sapiens GN=AHDC1 PE=1 SV=1	0.014	1.672	0.873362	1	2	1	1	1603	168.2	9.04	Not Found	Not Found	Not Found	Not Found									0.03	0	0	1	0	1
FALSE	High	IsMasterProtein	ch02i_Q8NHH9	Atlastin-2 OS=Homo sapiens GN=ATL2 PE=1 SV=2	0	74.933	14.5798	5	42	5	1	583	66.2	5.48	High	High	High	High		1.859	69.9569	130.043	62.8	77.2	137.2	122.8	1.395	0	40.7	5	694	5
FALSE	High	IsMasterProtein	Q6DD88	Atlastin-3 OS=Homo sapiens GN=ATL3 PE=1 SV=1	0	128.775	31.793	10	72	10	1	541	60.5	5.66	High	High	High	High		1.339	85.4887	114.511	84.5	86.5	115.5	113.5	2.687	0	77.37	10	1711	10
FALSE	High	IsMasterProtein	ch17u_Q8N5M1	ATP synthase mitochondrial F1 complex assembly factor 2 OS=Homo sapiens GN=ATPAF2 PE=1 SV=1	0	28.129	20.4152	4	20	4	1	289	32.8	7.09	High	High	High	High		1.069	96.6652	103.335	95.6	97.7	104.4	102.3	1.154	0	20.5	4	406	4
FALSE	High	IsMasterProtein	A0A059QB80	ATP synthase subunit a OS=Homo sapiens GN=ATP6 PE=4 SV=1	0	7.663	4.42478	1	18	1	1	226	24.7	10.1	High	High	High	High		1.044	97.8571	102.143	99.1	96.6	100.9	103.4	1.512	0	11.92	1	148	1
FALSE	High	IsMasterProtein	ch18i_P25705	ATP synthase subunit alpha, mitochondrial OS=Homo sapiens GN=ATP5A1 PE=1 SV=1	0	310.723	38.698	16	286	16	1	553	59.7	9.13	High	High	High	High		1.015	99.2575	100.742	98.9	99.6	101.1	100.4	16.508	0	365.4	16	7764	16
FALSE	High	IsMasterProtein	ch12i_P06576	ATP synthase subunit beta, mitochondrial OS=Homo sapiens GN=ATP5B PE=1 SV=3	0	419.254	48.9603	19	346	19	1	529	56.5	5.4	High	High	High	High		1.066	96.8176	103.182	97.1	96.6	102.9	103.4	73.296	0	450.31	19	7242	19
FALSE	High	IsMasterProtein	ch17i_O75947	ATP synthase subunit d, mitochondrial OS=Homo sapiens GN=ATP5H PE=1 SV=3	0	127.165	58.3851	7	94	7	1	161	18.5	5.3	High	High	High	High		0.932	103.514	96.4862	101.7	105.4	98.3	94.6	64.793	0	110.8	7	1585	7
FALSE	High	IsMasterProtein	P30049	ATP synthase subunit delta, mitochondrial OS=Homo sapiens GN=ATP5D PE=1 SV=2	0	21.416	8.33333	1	20	1	1	168	17.5	5.49	High	High	High	High		1.016	99.1881	100.812	99.3	99.1	100.7	100.9	1.371	0	25.49	1	564	1
FALSE	High	IsMasterProtein	ch04u_P56385	ATP synthase subunit e, mitochondrial OS=Homo sapiens GN=ATP5I PE=1 SV=2	0	12.263	30.4348	2	14	2	1	69	7.9	9.35	High	High	High	Peak Found		1.356	84.8959	115.104	84.6	85.2	115.4	114.8	5.31	0	10.47	1	95	2
FALSE	High	IsMasterProtein	ch07u_P56134	ATP synthase subunit f, mitochondrial OS=Homo sapiens GN=ATP5J2 PE=1 SV=3	0	39.241	41.4894	4	25	2	1	94	10.9	9.67	High	High	Peak Found	Peak Found	Acetyl [N-Term]	1.156	92.743	107.257	90	95.5	110	104.5	55.234	0	20.54	2	626	4
FALSE	High	IsMasterProtein	O75964	ATP synthase subunit g, mitochondrial OS=Homo sapiens GN=ATP5L PE=1 SV=3	0	5.773	12.6214	1	4	1	1	103	11.4	9.64	High	High	Peak Found	Peak Found		0.975	101.283	98.717	101.4	101.2	98.6	98.8	0.334	0	4.83	1	81	1
FALSE	High	IsMasterProtein	P36542	ATP synthase subunit gamma, mitochondrial OS=Homo sapiens GN=ATP5C1 PE=1 SV=1	0	35.94	19.4631	5	35	5	1	298	33	9.22	High	High	High	High		1.074	96.438	103.562	94.7	98.1	105.3	101.9	2.594	0	38.43	5	348	5
FALSE	High	IsMasterProtein	P48047	ATP synthase subunit O, mitochondrial OS=Homo sapiens GN=ATP5O PE=1 SV=1	0	115.055	34.7418	5	66	5	1	213	23.3	9.96	High	High	High	High		0.981	100.951	99.0488	101.5	100.4	98.5	99.6	9	0	99.99	5	2719	5
FALSE	High	IsMasterProtein	ch14i_Q99766	ATP synthase subunit s, mitochondrial OS=Homo sapiens GN=ATP5S PE=1 SV=3	0.007	2.513	5.11628	1	4	1	1	215	24.9	7.56	Not Found	Peak Found	Not Found	High		1.453	81.5189	118.481		81.5		118.5	0.136	0	3.87	1	43	1
FALSE	High	IsMasterProtein	ch19u_O43681	ATPase ASNA1 OS=Homo sapiens GN=ASNA1 PE=1 SV=2	0	59.441	26.1494	8	50	8	1	348	38.8	4.91	High	High	High	High		1.804	71.317	128.683	72.7	69.9	127.3	130.1	4.817	0	58.33	8	736	8
FALSE	High	IsMasterProtein	A0A0S2Z3L2	ATPase Ca++ transporting cardiac muscle slow twitch 2 isoform 1 (Fragment) OS=Homo sapiens GN=ATP2A2 PE=2 SV=1	0	323.977	30.4223	25	229	25	1	1042	114.7	5.34	High	High	High	High		1.383	83.9124	116.088	83.8	84	116.2	116	7.432	0	309.02	25	4830	25
FALSE	High	IsMasterProtein	Q8NBU5	ATPase family AAA domain-containing protein 1 OS=Homo sapiens GN=ATAD1 PE=1 SV=1	0	73.302	24.6537	6	30	6	1	361	40.7	6.9	High	Peak Found	High	High		2.183	62.8374	137.163	64	61.7	136	138.3	1.683	0	42.09	6	514	6
FALSE	High	IsMasterProtein	ch08u_Q6PL18	ATPase family AAA domain-containing protein 2 OS=Homo sapiens GN=ATAD2 PE=1 SV=1	0	55.735	8.1295	7	22	7	1	1390	158.5	6.32	Not Found	Not Found	High	High		100		200			200	200	0.278	0	30.55	7	349	7
FALSE	High	IsMasterProtein	Q96S55	ATPase WRNIP1 OS=Homo sapiens GN=WRNIP1 PE=1 SV=2	0	18.681	6.01504	3	12	3	1	665	72.1	6.1	High	High	High	High		3.853	41.2157	158.784	40.6	41.8	159.4	158.2	0.301	0	7.86	3	232	3
FALSE	High	IsMasterProtein	A0A024R883	ATPase, H+ transporting, lysosomal 13kDa, V1 subunit G1, isoform CRA_a OS=Homo sapiens GN=ATP6V1G1 PE=4 SV=1	0	27.167	22.0339	2	12	2	1	118	13.7	8.79	High	High	High	High	Acetyl [N-Term]	3.724	42.3363	157.664	42.4	42.3	157.6	157.7	3.642	0	10.87	1	482	2
FALSE	High	IsMasterProtein	Q53Y06	ATPase, H+ transporting, lysosomal 31kDa, V1 subunit E isoform 1 OS=Homo sapiens GN=ATP6V1E1 PE=2 SV=1	0	14.249	10.177	3	6	3	1	226	26.1	8	Not Found	Peak Found	Not Found	High	Acetyl [N-Term]	2.675	54.4216	145.578		54.4		145.6	0.54	0	4.77	2	128	3
FALSE	High	IsMasterProtein	Q9NRK6	ATP-binding cassette sub-family B member 10, mitochondrial OS=Homo sapiens GN=ABCB10 PE=1 SV=2	0	31.783	6.91057	4	12	4	1	738	79.1	9.85	Peak Found	High	High	High		1.112	94.7176	105.282	86	103.5	114	96.5	0.342	0	14.92	4	210	4
FALSE	High	IsMasterProtein	ch02i_Q9NP58	ATP-binding cassette sub-family B member 6, mitochondrial OS=Homo sapiens GN=ABCB6 PE=1 SV=1	0	32.174	5.70071	3	8	3	1	842	93.8	8.48	High	Peak Found	High	High		1.706	73.9135	126.086	68	79.9	132	120.1	0.233	0	12.48	3	262	3
FALSE	High	IsMasterProtein	chXi_B4DGL8	ATP-binding cassette sub-family B member 7, mitochondrial (Fragment) OS=Homo sapiens GN=ABCB7 PE=1 SV=1	0	16.439	6.12536	3	10	1	1	702	77.1	9.42	Not Found	Not Found	Not Found	Not Found									0.283	0	9.98	2	204	3
FALSE	High	IsMasterProtein	ch07i_Q9NUT2	ATP-binding cassette sub-family B member 8, mitochondrial OS=Homo sapiens GN=ABCB8 PE=1 SV=3	0	17.31	4.4898	2	6	2	1	735	79.9	8.98	Peak Found	Peak Found	High	High		1.002	99.9198	100.08	92.3	107.6	107.7	92.4	0.099	0	7.37	2	188	2
FALSE	High	IsMasterProtein	ch01i_P28288	ATP-binding cassette sub-family D member 3 OS=Homo sapiens GN=ABCD3 PE=1 SV=1	0	75.529	15.478	7	46	6	1	659	75.4	9.36	High	High	High	High		1.281	87.6624	112.338	88.3	87	111.7	113	1.081	1	39.09	7	690	7
FALSE	High	IsMasterProtein	ch04i_H0Y990	ATP-binding cassette sub-family E member 1 (Fragment) OS=Homo sapiens GN=ABCE1 PE=1 SV=1	0	42.232	35.3741	4	34	1	1	147	16.2	8.81	High	High	Peak Found	High		1.249	88.9314	111.069	95.3	82.5	104.7	117.5	5.31	0	31.05	4	373	4
FALSE	High	IsMasterProtein	ch04u_P61221	ATP-binding cassette sub-family E member 1 OS=Homo sapiens GN=ABCE1 PE=1 SV=1	0	162.482	30.0501	13	103	10	1	599	67.3	8.34	High	High	High	High		1.26	88.5093	111.491	88.7	88.3	111.3	111.7	4.623	5	126.49	13	1411	13
FALSE	High	IsMasterProtein	Q8NE71	ATP-binding cassette sub-family F member 1 OS=Homo sapiens GN=ABCF1 PE=1 SV=2	0	157.549	23.6686	12	76	12	1	845	95.9	6.8	High	High	High	High		1.353	84.9967	115.003	84.1	85.9	115.9	114.1	1.938	0	103.31	12	1866	11
FALSE	High	IsMasterProtein	A0A0S2Z5L1	ATP-binding cassette sub-family F member 3 isoform 1 (Fragment) OS=Homo sapiens GN=ABCF3 PE=2 SV=1	0	62.479	12.976	6	23	6	1	709	79.7	6.34	High	High	High	High	Acetyl [N-Term]	2.041	65.7602	134.24	66.2	65.3	133.8	134.7	0.52	0	33.33	5	658	6
FALSE	High	IsMasterProtein	ch21i_P17858	ATP-dependent 6-phosphofructokinase, liver type OS=Homo sapiens GN=PFKL PE=1 SV=6	0	178.307	22.0513	12	80	10	1	780	85	7.5	High	High	High	High		1.235	89.4936	110.506	88.6	90.4	111.4	109.6	2.415	0	104.83	12	2020	12
FALSE	High	IsMasterProtein	ch10u_Q01813	ATP-dependent 6-phosphofructokinase, platelet type OS=Homo sapiens GN=PFKP PE=1 SV=2	0	513.391	38.0102	24	386	22	1	784	85.5	7.55	High	High	High	High		1.14	93.4726	106.527	92.9	94	107.1	106	42.94	3	507.26	24	8484	24
FALSE	High	IsMasterProtein	Q16740	ATP-dependent Clp protease proteolytic subunit, mitochondrial OS=Homo sapiens GN=CLPP PE=1 SV=1	0	11.196	12.2744	1	8	1	1	277	30.2	8.09	High	High	High	High		1.056	97.2551	102.745	97.3	97.2	102.7	102.8	0.334	0	8.22	1	102	1
FALSE	High	IsMasterProtein	ch12u_P46063	ATP-dependent DNA helicase Q1 OS=Homo sapiens GN=RECQL PE=1 SV=3	0	148.902	23.8829	12	73	12	1	649	73.4	7.88	High	High	High	High		1.243	89.1634	110.837	89.1	89.2	110.9	110.8	2.665	0	91.18	12	1262	11
FALSE	High	IsMasterProtein	ch08i_A0A087WZ30	ATP-dependent DNA helicase Q4 OS=Homo sapiens GN=RECQL4 PE=1 SV=1	0	8.313	3.64238	2	3	2	1	1208	133	8.09	Not Found	Not Found	High	Not Found									0.093	0	2.73	2	57	1
FALSE	High	IsMasterProtein	ch01i_Q08211	ATP-dependent RNA helicase A OS=Homo sapiens GN=DHX9 PE=1 SV=4	0	542.475	26.6142	26	389	26	1	1270	140.9	6.84	High	High	High	High	Acetyl [N-Term]	1.09	95.6906	104.309	95.6	95.8	104.4	104.2	9.3	0	502.72	26	8992	26
FALSE	High	IsMasterProtein	ch02u_Q92499	ATP-dependent RNA helicase DDX1 OS=Homo sapiens GN=DDX1 PE=1 SV=2	0	395.476	35.1351	21	212	21	1	740	82.4	7.23	High	High	High	High		1.684	74.525	125.475	74	75	126	125	12.417	0	293.91	21	4958	21
FALSE	High	IsMasterProtein	ch14u_Q9GZR7	ATP-dependent RNA helicase DDX24 OS=Homo sapiens GN=DDX24 PE=1 SV=1	0	101.21	21.5367	12	53	12	1	859	96.3	9.06	High	High	High	High		5.535	30.6059	169.394	36	25.2	164	174.8	1.123	0	65.02	11	887	12
FALSE	High	IsMasterProtein	Q9UHL0	ATP-dependent RNA helicase DDX25 OS=Homo sapiens GN=DDX25 PE=1 SV=2	0	5.349	5.59006	1	4	1	1	483	54.7	6.28	Not Found	Not Found	Not Found	High									0.077	0	2.9	1	32	1
FALSE	High	IsMasterProtein	ch19u_O00148	ATP-dependent RNA helicase DDX39A OS=Homo sapiens GN=DDX39A PE=1 SV=2	0	129.719	34.192	10	80	3	1	427	49.1	5.68	High	High	High	Peak Found	Acetyl [N-Term]	1.107	94.9366	105.063	95.2	94.6	104.8	105.4	3.394	9	86.36	8	1698	10
FALSE	High	IsMasterProtein	chXi_A0A0D9SF53	ATP-dependent RNA helicase DDX3X OS=Homo sapiens GN=DDX3X PE=1 SV=1	0	307.993	34.1064	19	202	8	1	733	81.4	8.07	High	High	High	High	Acetyl [N-Term]	2.331	60.0342	139.966	60.2	59.8	139.8	140.2	5.086	13	283.45	18	4712	19
FALSE	High	IsMasterProtein	chYu_O15523	ATP-dependent RNA helicase DDX3Y OS=Homo sapiens GN=DDX3Y PE=1 SV=2	0	171.632	24.8485	13	112	2	1	660	73.1	7.55	Peak Found	High	High	High		2.162	63.2507	136.749	69.1	57.4	130.9	142.6	2.511	0	170.54	13	2293	13
FALSE	High	IsMasterProtein	Q86XP3	ATP-dependent RNA helicase DDX42 OS=Homo sapiens GN=DDX42 PE=1 SV=1	0	258.689	28.0384	17	122	17	1	938	102.9	7.02	High	High	High	High		1.798	71.4803	128.52	71.4	71.6	128.6	128.4	3.047	0	160.36	17	3076	17
FALSE	High	IsMasterProtein	B5BUE6	ATP-dependent RNA helicase DDX5 (Fragment) OS=Homo sapiens GN=DDX5 PE=2 SV=1	0	216.818	35.8306	22	210	18	1	614	69.1	8.92	High	High	High	High		2.193	62.6279	137.372	62.2	63	137.8	137	13.678	5	253.69	22	3687	22
FALSE	High	IsMasterProtein	ch10i_Q9BQ39	ATP-dependent RNA helicase DDX50 OS=Homo sapiens GN=DDX50 PE=1 SV=1	0	104.104	16.5536	9	64	7	1	737	82.5	9.17	High	High	High	High		2.157	63.3506	136.649	65.1	61.6	134.9	138.4	1.907	0	84.13	9	975	9
FALSE	High	IsMasterProtein	ch12u_Q8N8A6	ATP-dependent RNA helicase DDX51 OS=Homo sapiens GN=DDX51 PE=1 SV=3	0	62.297	21.021	9	32	9	1	666	72.4	8.16	Peak Found	High	High	High		5.922	28.8923	171.108	29	28.8	171	171.2	0.855	0	42.51	9	579	9
FALSE	High	IsMasterProtein	Q8NHQ9	ATP-dependent RNA helicase DDX55 OS=Homo sapiens GN=DDX55 PE=1 SV=3	0	31.702	12.6667	5	20	5	1	600	68.5	9.25	High	High	High	High		1.843	70.3563	129.644	70.8	69.9	129.2	130.1	0.438	0	23.94	5	473	5
FALSE	High	IsMasterProtein	ch05u_A0A087WYN9	ATP-dependent RNA helicase DHX29 OS=Homo sapiens GN=DHX29 PE=1 SV=1	0	120.455	13.2847	12	65	12	1	1370	155.2	8.15	High	High	High	High		1.634	75.941	124.059	75.9	76	124.1	124	0.719	0	63.92	12	1347	12
FALSE	High	IsMasterProtein	ch03i_Q9H2U1	ATP-dependent RNA helicase DHX36 OS=Homo sapiens GN=DHX36 PE=1 SV=2	0	105.146	15.7738	9	46	9	1	1008	114.7	7.68	High	High	High	High		2.455	57.8931	142.107	56.8	59	143.2	141	0.727	0	64.36	9	993	9
FALSE	High	IsMasterProtein	ch10i_Q8IYB8	ATP-dependent RNA helicase SUPV3L1, mitochondrial OS=Homo sapiens GN=SUPV3L1 PE=1 SV=1	0	49.886	9.28753	5	28	5	1	786	87.9	7.99	High	High	High	High		1.202	90.8112	109.189	75.1	106.5	124.9	93.5	0.567	0	36.5	5	666	5
FALSE	High	IsMasterProtein	ch10u_Q96TA2	ATP-dependent zinc metalloprotease YME1L1 OS=Homo sapiens GN=YME1L1 PE=1 SV=2	0	120.674	20.3105	12	62	12	1	773	86.4	8.76	High	High	High	High		1.987	66.9586	133.041	69.3	64.6	130.7	135.4	1.254	0	87.31	12	1455	12
FALSE	High	IsMasterProtein	A0A0S2Q0B1	AT-rich interactive domain-containing protein 1A OS=Homo sapiens GN=ARID1A PE=4 SV=1	0	111.075	6.25821	9	69	8	1	2285	241.9	6.7	High	High	High	High		2.085	64.8286	135.171	64.2	65.4	135.8	134.6	0.56	2	74.24	9	1250	9
FALSE	High	IsMasterProtein	ch12u_Q68CP9	AT-rich interactive domain-containing protein 2 OS=Homo sapiens GN=ARID2 PE=1 SV=2	0	47.548	6.53951	6	27	6	1	1835	197.3	7.42	High	High	High	High		3.009	49.8898	150.11	49.9	49.9	150.1	150.1	0.274	0	37.81	6	367	6
FALSE	Medium	IsMasterProtein	ch15i_Q8IVW6	AT-rich interactive domain-containing protein 3B OS=Homo sapiens GN=ARID3B PE=1 SV=2	0.049	0.725	1.60428	1	4	1	1	561	60.6	7.52	Peak Found	Peak Found	High	High		1.149	93.056	106.944	96.6	89.5	103.4	110.5	0.075	0	1.6	1	0	1
FALSE	High	IsMasterProtein	ch14i_P29374	AT-rich interactive domain-containing protein 4A OS=Homo sapiens GN=ARID4A PE=1 SV=3	0	6.706	1.59109	1	2	1	1	1257	142.7	5.1	Not Found	Not Found	High	Not Found		100		200			200		0.029	0	2.3	1	30	1
FALSE	High	IsMasterProtein	Q8WXE1	ATR-interacting protein OS=Homo sapiens GN=ATRIP PE=1 SV=1	0.001	4.112	2.52845	1	7	1	1	791	85.8	6.32	High	High	High	High		1.988	66.9414	133.059	64.7	69.2	135.3	130.8	0.122	0	0	1	0	1
FALSE	High	IsMasterProtein	ch20i_O75882	Attractin OS=Homo sapiens GN=ATRN PE=1 SV=2	0.002	3.575	0.909727	1	4	1	1	1429	158.4	7.31	Not Found	Not Found	High	High									0.031	0	5.55	1	38	1
FALSE	High	IsMasterProtein	ch01u_Q8NI60	Atypical kinase ADCK3, mitochondrial OS=Homo sapiens GN=ADCK3 PE=1 SV=1	0	9.581	4.48223	2	6	2	1	647	71.9	6.99	Not Found	Peak Found	High	High		18.627	10.1899	189.81		10.2		189.8	0.16	0	7.59	2	79	2
FALSE	High	IsMasterProtein	Q96D53	Atypical kinase COQ8B, mitochondrial OS=Homo sapiens GN=COQ8B PE=1 SV=2	0	57.652	16.7279	7	28	7	1	544	60	7.23	High	High	High	High		1.97	67.331	132.669	67.3	67.4	132.7	132.6	0.751	0	28.11	7	831	7
FALSE	High	IsMasterProtein	ch20i_O14965	Aurora kinase A OS=Homo sapiens GN=AURKA PE=1 SV=2	0	55.079	31.7618	9	24	1	1	403	45.8	9.39	Not Found	Peak Found	High	High		46.415	4.263	197.868		4.3	200	195.7	1.371	6	33.56	9	409	9
FALSE	High	IsMasterProtein	B5BUB5	Autoantigen La (Fragment) OS=Homo sapiens GN=SSB PE=2 SV=1	0	351.721	46.5686	21	269	21	1	408	46.8	7.12	High	High	High	High		1.104	95.064	104.936	94.9	95.2	105.1	104.8	91.367	0	343.11	21	4519	21
FALSE	High	IsMasterProtein	A9UGY9	Autophagy protein 5 OS=Homo sapiens GN=ATG5 PE=2 SV=1	0	12.155	9.81818	2	10	2	1	275	32.4	5.77	High	High	High	High		1.307	86.6927	113.307	85.5	87.9	114.5	112.1	0.501	0	7.57	2	135	2
FALSE	High	IsMasterProtein	ch12i_Q9BSB4	Autophagy-related protein 101 OS=Homo sapiens GN=ATG101 PE=1 SV=1	0	16.051	25.6881	4	11	4	1	218	25	6.15	Peak Found	Not Found	High	High		25.602	7.66217	196.169	7.7		192.3	200	1.424	0	11.56	4	173	3
FALSE	High	IsMasterProtein	ch02i_E7EVC7	Autophagy-related protein 16-1 OS=Homo sapiens GN=ATG16L1 PE=1 SV=1	0	17.045	11.859	5	16	5	1	624	70	6.62	Peak Found	High	High	High		1.347	85.2115	114.789	121.2	49.3	78.8	150.7	0.425	0	7.65	5	74	5
FALSE	High	IsMasterProtein	ch14i_Q96BY7	Autophagy-related protein 2 homolog B OS=Homo sapiens GN=ATG2B PE=1 SV=5	0	32.501	3.80173	6	21	6	1	2078	232.6	5.76	Peak Found	Peak Found	High	High		2.488	57.3313	142.669	45.8	68.9	154.2	131.1	0.116	0	15.38	6	367	6
FALSE	High	IsMasterProtein	Q96BJ3	Axin interactor, dorsalization-associated protein OS=Homo sapiens GN=AIDA PE=1 SV=1	0	23.563	12.0915	2	8	2	1	306	35	6.55	Peak Found	High	High	High		2.065	65.252	134.748	64.5	66	135.5	134	0.413	0	13.98	2	257	2
FALSE	High	IsMasterProtein	H3BLT4	Baculoviral IAP repeat-containing protein 5 OS=Homo sapiens GN=BIRC5 PE=1 SV=1	0	15.01	24.2424	3	8	3	1	165	18.6	6.21	Peak Found	Not Found	High	High	Acetyl [N-Term]	2.24	72.9794	163.51	73		127	200	1.371	0	8.18	2	139	3
FALSE	High	IsMasterProtein	ch02u_Q9NR09	Baculoviral IAP repeat-containing protein 6 OS=Homo sapiens GN=BIRC6 PE=1 SV=2	0	251.447	7.94729	20	106	20	1	4857	529.9	6.05	High	High	High	High		2.398	58.8509	141.149	57.1	60.6	142.9	139.4	0.364	0	141.88	20	2923	20
FALSE	High	IsMasterProtein	ch09u_J3QTA2	BAG family molecular chaperone regulator 1 OS=Homo sapiens GN=BAG1 PE=1 SV=1	0.001	4.425	6.37681	1	2	1	1	345	38.7	7.81	High	Not Found	Peak Found	Not Found		1.181	91.6881	108.312	91.7		108.3		0.11	0	2.54	1	18	1
FALSE	High	IsMasterProtein	O95817	BAG family molecular chaperone regulator 3 OS=Homo sapiens GN=BAG3 PE=1 SV=3	0	141.832	25.7391	10	90	10	1	575	61.6	6.95	High	High	High	High		5.332	31.5879	168.412	32.7	30.5	167.3	169.5	2.728	0	126.78	10	2182	10
FALSE	High	IsMasterProtein	ch08i_O95429	BAG family molecular chaperone regulator 4 OS=Homo sapiens GN=BAG4 PE=1 SV=1	0	16.173	6.78337	2	4	2	1	457	49.6	5.12	Peak Found	Not Found	High	Not Found		4.69	35.1487	164.851	35.1		164.9		0.359	0	5.75	2	106	2
FALSE	High	IsMasterProtein	ch06i_O43491	Band 4.1-like protein 2 OS=Homo sapiens GN=EPB41L2 PE=1 SV=1	0	335.777	33.7313	22	145	22	1	1005	112.5	5.44	High	High	High	High	Acetyl [N-Term]	1.683	74.5372	125.463	74.8	74.3	125.2	125.7	3.125	0	183.5	21	3111	22
FALSE	High	IsMasterProtein	ch02i_Q9HCM4	Band 4.1-like protein 5 OS=Homo sapiens GN=EPB41L5 PE=1 SV=3	0	12.914	1.90996	1	8	1	1	733	81.8	6.58	High	High	Not Found	High		0.784	143.696	112.609	200	87.4		112.6	0.129	0	4.77	1	137	1
FALSE	High	IsMasterProtein	Q8NFJ9	Bardet-Biedl syndrome 1 protein OS=Homo sapiens GN=BBS1 PE=1 SV=1	0.002	3.169	3.54132	1	2	1	1	593	65	7.93	Not Found	Not Found	Not Found	Not Found	Acetyl [N-Term]								0.07	0			60	1
FALSE	High	IsMasterProtein	ch11i_O75531	Barrier-to-autointegration factor OS=Homo sapiens GN=BANF1 PE=1 SV=1	0	31.4	26.9663	1	20	1	1	89	10.1	6.09	High	High	High	High		1.485	80.4878	119.512	79.9	81.1	120.1	118.9	2.728	0	28.27	1	410	1
FALSE	High	IsMasterProtein	A0A068W6H0	Basal cell adhesion molecule (Lutheran blood group) OS=Homo sapiens GN=BCAM PE=4 SV=1	0	54.175	16.7197	8	34	8	1	628	67.4	5.9	Peak Found	High	High	High		8.003	22.2155	177.785	25.7	18.8	174.3	181.2	0.725	0	42.39	8	809	8
FALSE	High	IsMasterProtein	ch01i_Q9NR55	Basic leucine zipper transcriptional factor ATF-like 3 OS=Homo sapiens GN=BATF3 PE=1 SV=1	0	5.669	18.8976	1	4	1	1	127	14.5	8.94	Not Found	Not Found	High	High		100		200			200	200	0.468	0	2.65	1	84	1
FALSE	High	IsMasterProtein	ch19u_P35613	Basigin OS=Homo sapiens GN=BSG PE=1 SV=2	0	68.962	23.1169	6	45	6	1	385	42.2	5.66	High	High	High	High		1.907	68.7944	131.206	69	68.6	131	131.4	3.467	0	48.3	6	806	6
FALSE	High	IsMasterProtein	ch07u_F2Z3H6	B-cell CLL/lymphoma 7 protein family member B OS=Homo sapiens GN=BCL7B PE=1 SV=2	0	10.03	11.2676	1	2	1	1	213	23.5	4.61	Not Found	Not Found	Not Found	High		100		200				200	0.233	0	3.79	1	44	1
FALSE	High	IsMasterProtein	ch11u_Q86UU0	B-cell CLL/lymphoma 9-like protein OS=Homo sapiens GN=BCL9L PE=1 SV=1	0	7.965	0.933956	1	4	1	1	1499	157	8.63	Peak Found	Peak Found	High	High		11.615	15.8543	184.146	16.9	14.8	183.1	185.2	0.046	0	8.02	1	90	1
FALSE	High	IsMasterProtein	ch19u_P20749	B-cell lymphoma 3 protein OS=Homo sapiens GN=BCL3 PE=1 SV=2	0	5.536	3.52423	1	2	1	1	454	47.6	8.41	Not Found	Not Found	High	Not Found									0.093	0	2.81	1	54	1
FALSE	High	IsMasterProtein	O95999	B-cell lymphoma/leukemia 10 OS=Homo sapiens GN=BCL10 PE=1 SV=1	0.002	3.59	4.29185	1	2	1	1	233	26.2	5.74	Not Found	Not Found	High	Not Found		100		200			200		0.194	0	2.2	1	30	1
FALSE	High	IsMasterProtein	A0A0K2GN21	BCKDHB protein OS=Homo sapiens GN=BCKDHB PE=4 SV=1	0	5.246	3.06122	1	4	1	1	392	43.1	6.61	High	High	Peak Found	Peak Found		0.971	101.458	98.5425	103	99.9	97	100.1	0.11	0	4.12	1	61	1
FALSE	High	IsMasterProtein	E9PK91	Bcl-2-associated transcription factor 1 OS=Homo sapiens GN=BCLAF1 PE=1 SV=1	0	58.505	9.29966	7	58	1	1	871	100.3	9.95	Not Found	Peak Found	Not Found	High		2.929	50.9082	149.092		50.9		149.1	0.82	0	55.44	7	539	7
FALSE	High	IsMasterProtein	Q9NYF8	Bcl-2-associated transcription factor 1 OS=Homo sapiens GN=BCLAF1 PE=1 SV=2	0	68.938	8.58696	8	70	1	1	920	106.1	9.98	High	High	Peak Found	Peak Found		1.399	83.3709	116.629	82.1	84.6	117.9	115.4	1.031	9	67.47	8	597	8
FALSE	High	IsMasterProtein	Q07817	Bcl-2-like protein 1 OS=Homo sapiens GN=BCL2L1 PE=1 SV=1	0.005	2.76	3.86266	1	4	1	1	233	26	4.93	Peak Found	Peak Found	High	High		3.097	48.8169	151.183	47.1	50.5	152.9	149.5	0.212	0	4.71	1	82	1
FALSE	High	IsMasterProtein	Q9HB09	Bcl-2-like protein 12 OS=Homo sapiens GN=BCL2L12 PE=1 SV=1	0	5.162	4.49102	1	4	1	1	334	36.8	9.22	Peak Found	Peak Found	High	High		5.521	30.6716	169.328	20.6	40.8	179.4	159.2	0.116	0	3.89	1	93	1
FALSE	High	IsMasterProtein	ch22i_Q9BXK5	Bcl-2-like protein 13 OS=Homo sapiens GN=BCL2L13 PE=1 SV=1	0	41.384	17.3196	4	17	4	1	485	52.7	4.44	High	High	High	High	Acetyl [N-Term]	1.125	94.1226	105.877	96.6	91.7	103.4	108.3	1.081	0	16.47	3	291	4
FALSE	High	IsMasterProtein	A9UF07	BCR/ABL fusion protein isoform Y5 OS=Homo sapiens GN=BCR/ABL fusion PE=2 SV=1	0	25.406	4.69274	5	15	5	1	1790	196.5	8.4	Peak Found	High	High	High		2.611	55.3873	144.613	44.5	66.3	155.5	133.7	0.181	0	16.25	5	137	4
FALSE	Medium	IsMasterProtein	K7ER46	Beclin-1 (Fragment) OS=Homo sapiens GN=BECN1 PE=1 SV=1	0.037	0.799	25.7576	1	1	1	1	132	15.4	4.46	Not Found	Not Found	Not Found	Not Found	Acetyl [N-Term]								0.233	0			0	1
FALSE	High	IsMasterProtein	ch11u_B8ZZS0	BET1-like protein OS=Homo sapiens GN=BET1L PE=1 SV=1	0	5.873	18.4211	2	4	2	1	152	17.1	8.88	Peak Found	Not Found	High	High		2.768	53.0736	146.926	53.1		146.9		0.52	0	4.33	2	74	2
FALSE	High	IsMasterProtein	B3VL17	Beta globin (Fragment) OS=Homo sapiens PE=3 SV=1	0	19.395	18.0952	3	49	3	1	105	11.5	6.37	High	High	Peak Found	Peak Found		0.01	199.606	0.394364	199.2	200	0.8	0	3.217	0			974	3
FALSE	High	IsMasterProtein	A7XZE4	Beta tropomyosin isoform OS=Homo sapiens GN=TPM2b PE=2 SV=1	0	180.288	36.2676	14	186	1	1	284	33	4.69	Not Found	Not Found	Not Found	Not Found		1.895	69.0852	130.915	68.5	69.6	131.5	130.4	32.246	7	238.21	14	2824	14
FALSE	High	IsMasterProtein	P15291	Beta-1,4-galactosyltransferase 1 OS=Homo sapiens GN=B4GALT1 PE=1 SV=5	0	40.637	17.0854	4	16	4	1	398	43.9	8.65	Peak Found	Peak Found	High	High		12.294	15.0444	184.956	10.6	19.5	189.4	180.5	0.896	0	23.96	4	568	4
FALSE	Medium	IsMasterProtein	ch22i_Q09327	Beta-1,4-mannosyl-glycoprotein 4-beta-N-acetylglucosaminyltransferase OS=Homo sapiens GN=MGAT3 PE=2 SV=3	0.017	1.485	1.31332	1	7	1	1	533	61.3	8.28	High	High	Peak Found	High		1.054	97.3494	102.651	97.4	97.3	102.6	102.7	0.16	0	0	1	0	1
FALSE	High	IsMasterProtein	A6XMH4	Beta-2-microglobulin OS=Homo sapiens PE=2 SV=1	0	19.665	28.2258	2	16	2	1	124	14.4	7.03	Peak Found	Peak Found	High	High		12.521	14.7915	185.208	20.2	9.4	179.8	190.6	1.371	0	20.03	2	126	2
FALSE	High	IsMasterProtein	ch16i_Q13425	Beta-2-syntrophin OS=Homo sapiens GN=SNTB2 PE=1 SV=1	0	9.05	2.59259	1	4	1	1	540	57.9	8.82	Peak Found	Not Found	High	Not Found		0.465	136.505	63.4945	136.5		63.5		0.15	0	4.98	1	77	1
FALSE	High	IsMasterProtein	A4UCU2	Beta-4 tubulin (Fragment) OS=Homo sapiens PE=2 SV=1	0	87.987	32.9268	3	56	2	1	82	9.6	4.03	High	High	Peak Found	Peak Found	Acetyl [N-Term]	1.341	85.4414	114.559	82.7	88.2	117.3	111.8	9999999	0	47.14	2	1503	3
FALSE	High	IsMasterProtein	P35612	Beta-adducin OS=Homo sapiens GN=ADD2 PE=1 SV=3	0	83.866	15.0138	7	47	7	1	726	80.8	5.92	High	High	High	High		1.662	75.1223	124.878	73	77.3	127	122.7	0.974	0	55.32	7	968	7
FALSE	High	IsMasterProtein	ch11i_P25098	Beta-adrenergic receptor kinase 1 OS=Homo sapiens GN=ADRBK1 PE=1 SV=2	0	14.782	6.24093	2	4	2	1	689	79.5	7.28	High	Not Found	High	Not Found		3.289	46.6277	153.372	46.6		153.4		0.108	0	6.64	2	130	2
FALSE	High	IsMasterProtein	ch11u_P49407	Beta-arrestin-1 OS=Homo sapiens GN=ARRB1 PE=1 SV=2	0	14.764	10.2871	3	11	3	1	418	47	6.2	High	High	High	High		1.17	92.1717	107.828	93.1	91.2	106.9	108.8	0.52	0	2.16	3	97	3
FALSE	High	IsMasterProtein	ch20u_A0A087WUB9	Beta-catenin-like protein 1 OS=Homo sapiens GN=CTNNBL1 PE=1 SV=1	0	81.796	14.7887	7	30	7	1	568	65.7	5.02	High	High	High	High	Acetyl [N-Term]	3.559	43.8669	156.133	44.3	43.5	155.7	156.5	1.783	0	43.49	7	538	7
FALSE	High	IsMasterProtein	ch02u_P42025	Beta-centractin OS=Homo sapiens GN=ACTR1B PE=1 SV=1	0	41.923	21.0106	6	25	3	1	376	42.3	6.4	High	High	High	High		0.894	105.579	94.4206	110.4	100.8	89.6	99.2	1.462	0	27.75	6	296	6
FALSE	High	IsMasterProtein	B3V096	BetaCstF-64 variant 2 OS=Homo sapiens GN=CSTF2 PE=2 SV=1	0	66.742	20.4355	8	35	8	1	597	62.9	6.87	High	High	High	High		1.266	88.2589	111.741	88.7	87.8	111.3	112.2	1.555	0	44.48	7	773	8
FALSE	High	IsMasterProtein	P13929	Beta-enolase OS=Homo sapiens GN=ENO3 PE=1 SV=5	0	209.851	37.788	10	406	2	1	434	47	7.71	Peak Found	High	High	High		0.988	100.627	99.3731	98.3	102.9	101.7	97.1	9	3	480.36	10	10407	9
FALSE	High	IsMasterProtein	B7Z6Q5	Beta-galactosidase OS=Homo sapiens PE=2 SV=1	0	61.472	12	6	26	6	1	725	81.8	7.94	High	High	High	High		1.184	91.5773	108.423	91.1	92.1	108.9	107.9	0.874	0	33.97	6	464	6
FALSE	High	IsMasterProtein	B4DVA7	Beta-hexosaminidase OS=Homo sapiens PE=2 SV=1	0	34.641	10.5556	4	30	4	1	540	62	5.26	High	High	High	High		1.682	74.5793	125.421	77.1	72.1	122.9	127.9	0.931	0	34.53	4	552	4
FALSE	High	IsMasterProtein	ch05u_P07686	Beta-hexosaminidase subunit beta OS=Homo sapiens GN=HEXB PE=1 SV=3	0	74.256	17.2662	7	46	7	1	556	63.1	6.76	High	High	High	High		1.558	78.1743	121.826	76.7	79.7	123.3	120.3	1.477	0	55.75	7	737	7
FALSE	High	IsMasterProtein	ch08i_Q53H82	Beta-lactamase-like protein 2 OS=Homo sapiens GN=LACTB2 PE=1 SV=2	0	129.619	31.25	8	79	8	1	288	32.8	6.8	High	High	High	High		1.693	74.261	125.739	73.5	75	126.5	125	19.535	0	98.06	8	1505	8
FALSE	High	IsMasterProtein	Q16143	Beta-synuclein OS=Homo sapiens GN=SNCB PE=1 SV=1	0.008	2.264	9.70149	1	4	1	1	134	14.3	4.41	Not Found	Peak Found	High	High		0.352	147.935	52.0646		147.9		52.1	0.389	0	4.23	1	18	1
FALSE	High	IsMasterProtein	ch04i_O43252	Bifunctional 3'-phosphoadenosine 5'-phosphosulfate synthase 1 OS=Homo sapiens GN=PAPSS1 PE=1 SV=2	0	81.055	12.9808	6	48	5	1	624	70.8	6.86	High	High	High	High		1.822	70.8796	129.12	71.1	70.6	128.9	129.4	1.39	0	60.23	6	891	6
FALSE	High	IsMasterProtein	A0A0S2PZM4	Bifunctional arginine demethylase and lysyl-hydroxylase JMJD6 OS=Homo sapiens GN=JMJD6 PE=4 SV=1	0	122.912	27.7778	7	42	7	1	414	47.6	8.73	High	High	High	High		1.489	80.3577	119.642	83	77.8	117	122.2	7.66	0	58.21	7	1278	7
FALSE	High	IsMasterProtein	ch01i_Q5D1E8	Bifunctional endoribonuclease and deubiquitinase ZC3H12A OS=Homo sapiens GN=ZC3H12A PE=1 SV=1	0.009	2.117	2.00334	1	4	1	1	599	65.7	6.93	Not Found	Not Found	High	Not Found		100		200			200		0.062	0	0	1	0	1
FALSE	High	IsMasterProtein	ch08i_P34913	Bifunctional epoxide hydrolase 2 OS=Homo sapiens GN=EPHX2 PE=1 SV=2	0	20.873	7.02703	2	6	2	1	555	62.6	6.28	Peak Found	Peak Found	High	High		1.06	97.0703	102.93	96.4	97.7	103.6	102.3	0.16	0	10.37	2	238	2
FALSE	High	IsMasterProtein	P07814	Bifunctional glutamate/proline--tRNA ligase OS=Homo sapiens GN=EPRS PE=1 SV=5	0	558.985	30.8201	34	342	34	1	1512	170.5	7.33	High	High	High	High		1.373	84.2797	115.72	84.8	83.7	115.2	116.3	5.898	0	473.53	34	7455	34
FALSE	High	IsMasterProtein	Q8IUF8	Bifunctional lysine-specific demethylase and histidyl-hydroxylase MINA OS=Homo sapiens GN=MINA PE=1 SV=1	0	45.545	17.6344	5	24	5	1	465	52.8	6.7	High	High	High	High		1.945	67.902	132.098	62.2	73.6	137.8	126.4	0.743	0	27.02	5	564	5
FALSE	High	IsMasterProtein	P13995	Bifunctional methylenetetrahydrofolate dehydrogenase/cyclohydrolase, mitochondrial OS=Homo sapiens GN=MTHFD2 PE=1 SV=2	0	123.476	22.5714	5	55	5	1	350	37.9	8.73	High	High	High	High		2.479	57.4803	142.52	58.1	56.9	141.9	143.1	2.899	0	86.08	5	1639	5
FALSE	High	IsMasterProtein	ch19i_Q96T60	Bifunctional polynucleotide phosphatase/kinase OS=Homo sapiens GN=PNKP PE=1 SV=1	0	10.693	4.22265	2	6	2	1	521	57	8.46	Peak Found	High	High	Peak Found		1.267	88.2359	111.764	83.9	92.6	116.1	107.4	0.225	0	2.9	2	56	2
FALSE	High	IsMasterProtein	P31939	Bifunctional purine biosynthesis protein PURH OS=Homo sapiens GN=ATIC PE=1 SV=3	0	496.679	63.1757	27	338	5	1	592	64.6	6.71	High	High	High	High		1.111	94.7332	105.267	94.5	95	105.5	105	49.432	33	403.98	26	6716	26
FALSE	High	IsMasterProtein	ch07i_P53004	Biliverdin reductase A OS=Homo sapiens GN=BLVRA PE=1 SV=2	0	64.433	24.3243	7	68	7	1	296	33.4	6.44	High	High	High	High		1.21	90.4935	109.506	90.5	90.5	109.5	109.5	4.456	0	76.91	7	758	7
FALSE	High	IsMasterProtein	Q6QNY0	Biogenesis of lysosome-related organelles complex 1 subunit 3 OS=Homo sapiens GN=BLOC1S3 PE=1 SV=1	0	9.352	9.40594	1	2	1	1	202	21.2	5.15	Peak Found	Not Found	High	Not Found		1.49	80.3163	119.684	80.3		119.7		0.155	0	3.31	1	102	1
FALSE	High	IsMasterProtein	Q9NUP1	Biogenesis of lysosome-related organelles complex 1 subunit 4 OS=Homo sapiens GN=BLOC1S4 PE=1 SV=1	0	5.042	8.29493	1	2	1	1	217	23.3	4.98	Not Found	Peak Found	Not Found	High		2.178	62.9266	137.073		62.9		137.1	0.259	0	0	1	30	1
FALSE	High	IsMasterProtein	ch15u_H3BST1	Biogenesis of lysosome-related organelles complex 1 subunit 6 OS=Homo sapiens GN=BLOC1S6 PE=1 SV=1	0	8.504	12.9944	1	2	1	1	177	20.3	6.42	Not Found	High	Not Found	Peak Found		2.35	59.7058	140.294		59.7		140.3	0.334	0	4.36	1	78	1
FALSE	High	IsMasterProtein	Q96IK1	Biorientation of chromosomes in cell division protein 1 OS=Homo sapiens GN=BOD1 PE=1 SV=2	0	20.364	14.5946	2	10	1	1	185	19.2	6.33	Peak Found	Peak Found	High	High		9.828	18.4705	181.529	23.2	13.8	176.8	186.2	1.154	0	11.78	2	185	2
FALSE	High	IsMasterProtein	ch04i_Q8NFC6	Biorientation of chromosomes in cell division protein 1-like 1 OS=Homo sapiens GN=BOD1L1 PE=1 SV=2	0	132.601	7.73517	14	62	13	1	3051	330.3	5.08	High	High	High	High		3.376	45.7086	154.291	42.5	48.9	157.5	151.1	0.321	1	76.35	14	1307	13
FALSE	High	IsMasterProtein	P50583	Bis(5'-nucleosyl)-tetraphosphatase [asymmetrical] OS=Homo sapiens GN=NUDT2 PE=1 SV=3	0	10.815	25.8503	2	6	2	1	147	16.8	5.35	Peak Found	Peak Found	High	High		1.603	76.8318	123.168	75.8	77.9	124.2	122.1	0.585	0	10.74	2	47	2
FALSE	High	IsMasterProtein	Q9NXW1	BJ-HCC-24 tumor antigen OS=Homo sapiens PE=2 SV=1	0	59.612	20.1456	6	36	1	1	412	46.8	6.83	High	High	High	High		0.434	139.437	60.5631	139.7	139.2	60.3	60.8	1.512	0	48.58	6	526	6
FALSE	High	IsMasterProtein	ch17i_Q13867	Bleomycin hydrolase OS=Homo sapiens GN=BLMH PE=1 SV=1	0	70.234	18.2418	6	42	6	1	455	52.5	6.27	High	High	High	High		1.111	94.7633	105.237	100.6	88.9	99.4	111.1	2.162	0	44.39	6	441	6
FALSE	High	IsMasterProtein	ch04u_Q9NSY1	BMP-2-inducible protein kinase OS=Homo sapiens GN=BMP2K PE=1 SV=2	0	19.07	7.06288	4	12	4	1	1161	129.1	6.51	Peak Found	Not Found	High	High		5.048	36.0492	181.975	36		164	200	0.186	0	13.71	4	261	4
FALSE	High	IsMasterProtein	Q9Y3E2	BolA-like protein 1 OS=Homo sapiens GN=BOLA1 PE=1 SV=1	0	14.13	26.2774	2	6	2	1	137	14.3	7.96	Not Found	Peak Found	High	High		4.077	39.39	160.61		39.4		160.6	0.668	0	8.83	2	169	2
FALSE	High	IsMasterProtein	Q9H3K6	BolA-like protein 2 OS=Homo sapiens GN=BOLA2 PE=1 SV=1	0	62.937	61.6279	4	34	4	1	86	10.1	6.52	High	High	High	High	Acetyl [N-Term]	1.317	86.3099	113.69	88.9	83.8	111.1	116.2	25.827	0	47.58	4	538	4
FALSE	High	IsMasterProtein	ch01u_Q9NWK9	Box C/D snoRNA protein 1 OS=Homo sapiens GN=ZNHIT6 PE=1 SV=1	0	21.576	9.78723	3	8	3	1	470	53.9	5.8	Not Found	Peak Found	Not Found	High		100		200				200	0.194	0	11.34	3	218	3
FALSE	High	IsMasterProtein	ch05i_P80723	Brain acid soluble protein 1 OS=Homo sapiens GN=BASP1 PE=1 SV=2	0	313.721	48.4581	9	193	9	1	227	22.7	4.63	High	High	High	High		1.118	94.4255	105.575	94.5	94.4	105.5	105.6	344.511	0	320.22	9	3970	9
FALSE	High	IsMasterProtein	I3L4C2	Brain-specific angiogenesis inhibitor 1-associated protein 2 OS=Homo sapiens GN=BAIAP2 PE=1 SV=1	0	44.136	20.0723	8	32	8	1	553	61.3	8.94	Peak Found	Peak Found	High	High		6.041	28.4052	171.595	28.2	28.6	171.8	171.4	0.551	0	31.83	8	441	8
FALSE	High	IsMasterProtein	ch07i_Q9UHR4	Brain-specific angiogenesis inhibitor 1-associated protein 2-like protein 1 OS=Homo sapiens GN=BAIAP2L1 PE=1 SV=2	0	83.708	20.1566	7	48	7	1	511	56.8	8.68	High	High	High	High		3.276	46.7721	153.228	46.6	46.9	153.4	153.1	1.336	0	51.85	7	745	7
FALSE	Medium	IsMasterProtein	A0A0U1RR72	Brain-specific serine protease 4 OS=Homo sapiens GN=PRSS22 PE=1 SV=2	0.027	0.975	5.12821	1	1	1	1	312	34	6.73	Not Found	Not Found	Not Found	Not Found									0.155	0	0	1
FALSE	High	IsMasterProtein	M0QXF9	Branched-chain-amino-acid aminotransferase (Fragment) OS=Homo sapiens GN=BCAT2 PE=1 SV=1	0	100.681	31.236	10	52	10	1	445	49.9	7.46	High	High	High	High		1.179	91.7666	108.233	91.7	91.8	108.3	108.2	4.179	0	71.33	10	1125	10
FALSE	High	IsMasterProtein	Q59H81	BRCA1 associated protein variant (Fragment) OS=Homo sapiens PE=2 SV=1	0	18.407	3.9557	2	12	2	1	632	71.1	6.09	High	High	High	High		4.169	38.6944	161.306	40	37.4	160	162.6	0.189	0	12.69	2	274	2
FALSE	High	IsMasterProtein	A0A024QZ45	BRCA1 interacting protein C-terminal helicase 1, isoform CRA_a OS=Homo sapiens GN=BRIP1 PE=4 SV=1	0.003	2.924	1.04083	1	2	1	1	1249	140.8	6.92	Not Found	Not Found	Not Found	Not Found									0.027	0	2.08	1	30	1
FALSE	High	IsMasterProtein	ch05i_Q96RL1	BRCA1-A complex subunit RAP80 OS=Homo sapiens GN=UIMC1 PE=1 SV=2	0	7.313	2.50348	1	2	1	1	719	79.7	5.45	Not Found	Peak Found	Not Found	High		4.665	35.3048	164.695		35.3		164.7	0.054	0	2.98	1	41	1
FALSE	High	IsMasterProtein	ch07u_Q6PJG6	BRCA1-associated ATM activator 1 OS=Homo sapiens GN=BRAT1 PE=1 SV=2	0	62.272	19.732	10	45	10	1	821	88.1	5.27	High	High	High	High	Acetyl [N-Term]	4.165	38.7245	161.276	37.4	40.1	162.6	159.9	0.778	0	48.35	10	858	10
FALSE	High	IsMasterProtein	ch10i_Q9P287	BRCA2 and CDKN1A-interacting protein OS=Homo sapiens GN=BCCIP PE=1 SV=1	0	163.649	35.0318	8	92	2	1	314	36	4.61	High	High	High	High		1.569	77.8616	122.138	77.2	78.6	122.8	121.4	9	10	127.04	8	1782	8
FALSE	Medium	IsMasterProtein	ch11u_G5E9I4	Breast cancer metastasis suppressor 1, isoform CRA_c OS=Homo sapiens GN=BRMS1 PE=1 SV=1	0.015	1.652	4.82759	1	4	1	1	290	33.7	5.02	Not Found	Not Found	High	High		100		200			200	200	0.136	0	3.95	1	0	1
FALSE	High	IsMasterProtein	Q5PSV4	Breast cancer metastasis-suppressor 1-like protein OS=Homo sapiens GN=BRMS1L PE=1 SV=2	0	6.247	4.33437	1	2	1	1	323	37.6	5.15	Peak Found	Not Found	High	Not Found		2.796	52.6903	147.31	52.7		147.3		0.11	0	2.02	1	45	1
FALSE	High	IsMasterProtein	ch20u_Q9Y6D5	Brefeldin A-inhibited guanine nucleotide-exchange protein 2 OS=Homo sapiens GN=ARFGEF2 PE=1 SV=3	0	76.294	6.89076	8	34	6	1	1785	201.9	6.33	Peak Found	High	High	High		1.541	78.7075	121.292	70.4	87	129.6	113	0.286	0	36.36	8	871	8
FALSE	High	IsMasterProtein	Q5TH69	Brefeldin A-inhibited guanine nucleotide-exchange protein 3 OS=Homo sapiens GN=ARFGEF3 PE=1 SV=3	0	24.259	2.06706	3	12	3	1	2177	240.5	5.82	High	High	High	High		1.271	88.0769	111.923	100.8	75.3	99.2	124.7	0.083	0	8	3	233	3
FALSE	High	IsMasterProtein	ch14i_F8VS36	BRF1 homolog, subunit of RNA polymerase III transcription initiation factor IIIB (S. cerevisiae), isoform CRA_d OS=Homo sapiens GN=BRF1 PE=1 SV=1	0	9.513	3.98818	2	4	2	1	677	73.8	5.43	Not Found	Not Found	High	High									0.145	0	2.47	2	73	2
FALSE	High	IsMasterProtein	Q8WY22	BRI3-binding protein OS=Homo sapiens GN=BRI3BP PE=1 SV=1	0	22.819	7.56972	1	8	1	1	251	27.8	9.44	High	High	High	High		1.02	99.0264	100.974	95.9	102.2	104.1	97.8	0.468	0	14.36	1	441	1
FALSE	High	IsMasterProtein	Q53HW0	Bridging integrator 3 variant (Fragment) OS=Homo sapiens PE=2 SV=1	0	9.336	7.50988	1	2	1	1	253	29.7	8.06	Peak Found	Not Found	High	Not Found		1.778	72.001	127.999	72		128		0.145	0	3.57	1	63	1
FALSE	High	IsMasterProtein	ch19i_Q9NWV8	BRISC and BRCA1-A complex member 1 OS=Homo sapiens GN=BABAM1 PE=1 SV=1	0	35.147	12.766	2	10	2	1	329	36.5	4.64	High	High	High	High		1.492	80.2718	119.728	78.9	81.6	121.1	118.4	0.438	0	17.18	2	560	2
FALSE	High	IsMasterProtein	Q15018	BRISC complex subunit Abro1 OS=Homo sapiens GN=FAM175B PE=1 SV=2	0	7.233	4.09639	1	4	1	1	415	46.9	6.21	Not Found	Not Found	High	High		100		200			200	200	0.105	0	1.8	1	47	1
FALSE	High	IsMasterProtein	ch01u_Q5VW32	BRO1 domain-containing protein BROX OS=Homo sapiens GN=BROX PE=1 SV=1	0	69.063	35.0365	7	38	7	1	411	46.4	7.65	High	High	High	High		1.689	74.3689	125.631	75.4	73.3	124.6	126.7	1.783	0	38.81	7	671	7
FALSE	Medium	IsMasterProtein	ch14i_H0YJ74	Bromodomain adjacent to zinc finger domain protein 1A (Fragment) OS=Homo sapiens GN=BAZ1A PE=1 SV=1	0.037	0.787	7.89474	1	1	1	1	76	8.4	9.99	Not Found	Not Found	Not Found	Not Found									2.162	0			0	1
FALSE	High	IsMasterProtein	ch14i_Q9NRL2	Bromodomain adjacent to zinc finger domain protein 1A OS=Homo sapiens GN=BAZ1A PE=1 SV=2	0	66.542	9.2545	9	32	7	1	1556	178.6	6.6	Peak Found	High	High	High		3.467	44.7751	155.225	43.5	46	156.5	154	0.352	1	36.57	9	598	9
FALSE	High	IsMasterProtein	ch12i_Q9UIF9	Bromodomain adjacent to zinc finger domain protein 2A OS=Homo sapiens GN=BAZ2A PE=1 SV=4	0	9.966	1.67979	2	4	2	1	1905	211.1	6.64	Peak Found	Not Found	High	Not Found		7.239	24.2752	175.725	24.3		175.7		0.063	0	2.16	2	112	2
FALSE	Medium	IsMasterProtein	ch02u_H7BXK5	Bromodomain adjacent to zinc finger domain protein 2B (Fragment) OS=Homo sapiens GN=BAZ2B PE=4 SV=1	0.016	1.545	2.8436	1	2	1	1	211	24.8	9.33	High	Not Found	Peak Found	Not Found		0.886	106.058	93.9417	106.1		93.9		0.468	0			29	1
FALSE	High	IsMasterProtein	ch06u_A0A0G2JK44	Bromodomain-containing protein 2 OS=Homo sapiens GN=BRD2 PE=1 SV=1	0	42.687	10.5263	5	18	4	1	836	92	9.16	Not Found	Peak Found	High	High		4.358	41.1718	179.414		41.2	200	158.8	0.401	0	28.12	5	403	5
FALSE	High	IsMasterProtein	Q15059	Bromodomain-containing protein 3 OS=Homo sapiens GN=BRD3 PE=1 SV=1	0	29.387	8.26446	4	16	3	1	726	79.5	9.36	High	High	High	High		3.004	49.9491	150.051	45.5	54.4	154.5	145.6	0.403	0	19.84	4	293	4
FALSE	High	IsMasterProtein	ch19i_O60885	Bromodomain-containing protein 4 OS=Homo sapiens GN=BRD4 PE=1 SV=2	0	23.317	5.06608	5	22	3	1	1362	152.1	9.19	Peak Found	Peak Found	High	High		3.227	47.3169	152.683	46.7	47.9	153.3	152.1	0.304	2	23.61	5	61	5
FALSE	High	IsMasterProtein	Q9H0E9	Bromodomain-containing protein 8 OS=Homo sapiens GN=BRD8 PE=1 SV=2	0	13.283	3.23887	3	5	3	1	1235	135.3	4.6	Not Found	Not Found	High	High		100		200			200	200	0.129	0	6.7	3	109	2
FALSE	Medium	IsMasterProtein	Q9H8M2	Bromodomain-containing protein 9 OS=Homo sapiens GN=BRD9 PE=1 SV=2	0.02	1.316	2.17755	1	2	1	1	597	67	6.19	Not Found	Peak Found	Not Found	High		4.564	35.9447	164.055		35.9		164.1	0.08	0	0	1	20	1
FALSE	High	IsMasterProtein	A0A024R7E0	BTB (POZ) domain containing 14B, isoform CRA_a OS=Homo sapiens GN=BTBD14B PE=4 SV=1	0	24.074	13.4725	4	14	4	1	527	57.2	5.74	Peak Found	Peak Found	High	High		6.676	26.0544	173.946	25	27.1	175	172.9	0.407	0	16.07	4	207	4
FALSE	High	IsMasterProtein	Q3ZTS5	BTB domain containing 1 OS=Homo sapiens GN=BTBD1 PE=2 SV=1	0	12.068	5.60166	2	4	2	1	482	52.7	6.1	Not Found	Not Found	High	High		100		200			200	200	0.186	0	5.41	2	85	2
FALSE	High	IsMasterProtein	Q13829	BTB/POZ domain-containing adapter for CUL3-mediated RhoA degradation protein 2 OS=Homo sapiens GN=TNFAIP1 PE=1 SV=1	0	14.553	10.1266	2	4	1	1	316	36.2	8.03	Not Found	Not Found	Not Found	High		100		200				200	0.222	0	4.54	2	132	2
FALSE	High	IsMasterProtein	Q9H3F6	BTB/POZ domain-containing adapter for CUL3-mediated RhoA degradation protein 3 OS=Homo sapiens GN=KCTD10 PE=1 SV=1	0	12.867	8.94569	2	6	1	1	313	35.4	6.34	Not Found	Not Found	High	High		100		200			200	200	0.245	1	8.41	2	131	2
FALSE	High	IsMasterProtein	ch14u_Q9P203	BTB/POZ domain-containing protein 7 OS=Homo sapiens GN=BTBD7 PE=1 SV=3	0.002	3.193	0.971731	1	2	1	1	1132	126.3	6.98	Not Found	Not Found	High	Not Found		100		200			200		0.04	0	2.13	1	36	1
FALSE	High	IsMasterProtein	A0A1B0GUL6	BTB/POZ domain-containing protein 8 OS=Homo sapiens GN=BTBD8 PE=4 SV=1	0	11.883	1.11607	1	4	1	1	1792	198.9	6.15	Not Found	Not Found	High	High		100		200			200	200	0.021	0	7.34	1	132	1
FALSE	High	IsMasterProtein	ch18u_J3QRK1	BTB/POZ domain-containing protein KCTD1 (Fragment) OS=Homo sapiens GN=KCTD1 PE=1 SV=1	0	7.336	7.30769	2	4	2	1	260	29.8	7.78	Not Found	Peak Found	Not Found	High		3.982	40.1467	159.853		40.1		159.9	0.311	0	4.71	2	52	2
FALSE	High	IsMasterProtein	ch06u_Q7Z5Y7	BTB/POZ domain-containing protein KCTD20 OS=Homo sapiens GN=KCTD20 PE=1 SV=1	0	6.235	4.53461	1	5	1	1	419	47.5	5.33	Peak Found	Peak Found	High	High		3.98	40.164	159.836	34.4	45.9	165.6	154.1	0.105	0	2.59	1	27	1
FALSE	High	IsMasterProtein	ch01u_Q9Y597	BTB/POZ domain-containing protein KCTD3 OS=Homo sapiens GN=KCTD3 PE=1 SV=2	0	23.866	8.71166	4	16	3	1	815	88.9	7.03	Not Found	Not Found	High	High		100		200			200	200	0.212	0	14.63	4	208	4
FALSE	High	IsMasterProtein	ch16u_Q9NXV2	BTB/POZ domain-containing protein KCTD5 OS=Homo sapiens GN=KCTD5 PE=1 SV=1	0	18.741	14.1026	2	6	2	1	234	26.1	6.24	Not Found	Not Found	High	Not Found	Acetyl [N-Term]	100		200			200		0.468	0	6.3	1	262	2
FALSE	High	IsMasterProtein	ch08u_Q7L273	BTB/POZ domain-containing protein KCTD9 OS=Homo sapiens GN=KCTD9 PE=1 SV=1	0	12.784	10.5398	3	8	3	1	389	42.5	6.37	Not Found	Peak Found	High	High		6.011	30.719	184.641		30.7	200	169.3	0.318	0	11.74	3	188	3
FALSE	High	IsMasterProtein	ch17i_X6R4W8	BUB3-interacting and GLEBS motif-containing protein ZNF207 OS=Homo sapiens GN=ZNF207 PE=1 SV=1	0	22.62	5.23139	2	16	2	1	497	52.6	8.47	High	High	High	High		1.974	67.2547	132.745	67.4	67.1	132.6	132.9	1.783	0	20.95	2	294	2
FALSE	Low	IsMasterProtein	A0N0R2	Burkitt lymphoma receptor 1, GTP binding protein (Chemokine (C-X-C motif) receptor 5) OS=Homo sapiens GN=BLR1 PE=3 SV=1	0.05	0.707	4.56989	1	2	1	1	372	41.9	8.16	High	Not Found	Not Found	Not Found									0.155	0	0	1	0	1
FALSE	High	IsMasterProtein	Q13895	Bystin OS=Homo sapiens GN=BYSL PE=1 SV=3	0	65.313	21.7391	7	36	7	1	437	49.6	8.12	High	High	High	High		2.248	61.5839	138.416	62.2	61	137.8	139	1.212	0	44.05	7	738	7
FALSE	High	IsMasterProtein	Q496Y1	C10orf118 protein (Fragment) OS=Homo sapiens GN=C10orf118 PE=2 SV=1	0.004	2.837	1.89243	1	2	1	1	1004	115.8	6.87	Not Found	Not Found	Not Found	High		100		200				200	0.032	0	1.78	1	27	1
FALSE	High	IsMasterProtein	ch11u_Q4AC94	C2 domain-containing protein 3 OS=Homo sapiens GN=C2CD3 PE=1 SV=4	0.003	3.018	0.722482	1	2	1	1	2353	260.2	7.12	Not Found	Not Found	Not Found	High		100		200				200	0.019	0	2.39	1	26	1
FALSE	Medium	IsMasterProtein	P21730	C5a anaphylatoxin chemotactic receptor 1 OS=Homo sapiens GN=C5AR1 PE=1 SV=2	0.03	0.895	8.57143	1	3	1	1	350	39.3	9.01	High	Not Found	Not Found	Not Found		0.01	200		200				0	0	0	1
FALSE	High	IsMasterProtein	ch01u_O75844	CAAX prenyl protease 1 homolog OS=Homo sapiens GN=ZMPSTE24 PE=1 SV=2	0	54.529	14.3158	5	43	5	1	475	54.8	7.49	High	High	High	High		1.218	90.1765	109.823	90.7	89.7	109.3	110.3	2.008	0	41.09	5	1009	5
FALSE	High	IsMasterProtein	ch11u_Q9Y256	CAAX prenyl protease 2 OS=Homo sapiens GN=RCE1 PE=1 SV=1	0	14.969	4.25532	1	8	1	1	329	35.8	7.97	High	High	High	High		0.521	131.526	68.4739	154.6	108.5	45.4	91.5	0.359	0	10.7	1	196	1
FALSE	High	IsMasterProtein	ch02u_P27708	CAD protein OS=Homo sapiens GN=CAD PE=1 SV=3	0	521.357	27.1461	38	275	36	1	2225	242.8	6.46	High	High	High	High	Acetyl [N-Term]	1.211	90.4376	109.562	90.7	90.2	109.3	109.8	3.156	1	353.71	37	5621	38
FALSE	High	IsMasterProtein	ch16i_A0A087WXI5	Cadherin-1 OS=Homo sapiens GN=CDH1 PE=1 SV=1	0	7.806	1.99336	1	4	1	1	903	100	4.79	Not Found	Peak Found	High	High		2.907	51.1908	148.809		51.2		148.8	0.061	0	5.17	1	70	1
FALSE	Medium	IsMasterProtein	ch08u_H0YBL0	Cadherin-17 (Fragment) OS=Homo sapiens GN=CDH17 PE=1 SV=1	0.029	0.924	14.4444	1	2	1	1	90	9.9	5.15	High	High	Peak Found	Peak Found	Acetyl [N-Term]	1.125	94.1384	105.862	94.5	93.8	105.5	106.2	0.468	0			0	1
FALSE	High	IsMasterProtein	ch18i_P19022	Cadherin-2 OS=Homo sapiens GN=CDH2 PE=1 SV=4	0	52.863	7.83664	5	30	5	1	906	99.7	4.81	High	High	High	High		1.854	70.068	129.932	76.2	63.9	123.8	136.1	0.604	0	43.03	5	597	5
FALSE	High	IsMasterProtein	H0YNG9	Calcineurin B homologous protein 1 OS=Homo sapiens GN=CHP1 PE=1 SV=1	0	60.531	42.8571	5	38	1	1	154	18	5.67	Peak Found	Not Found	High	Not Found		1.217	90.1975	109.802	90.2		109.8		6.017	0	49.12	5	664	5
FALSE	High	IsMasterProtein	ch15i_Q99653	Calcineurin B homologous protein 1 OS=Homo sapiens GN=CHP1 PE=1 SV=3	0	96.369	45.1282	7	66	3	1	195	22.4	5.1	High	High	High	High		2.138	63.7309	136.269	63.3	64.1	136.7	135.9	10.659	7	90.99	7	1340	7
FALSE	High	IsMasterProtein	ch12i_Q96BS2	Calcineurin B homologous protein 3 OS=Homo sapiens GN=TESC PE=1 SV=3	0	17.394	17.757	3	12	3	1	214	24.7	4.93	Peak Found	Peak Found	High	High		2.649	54.8074	145.193	83.4	26.2	116.6	173.8	0.778	0	13.35	3	277	3
FALSE	High	IsMasterProtein	J3QK89	Calcium homeostasis endoplasmic reticulum protein OS=Homo sapiens GN=CHERP PE=1 SV=1	0	76.748	9.92449	7	40	7	1	927	104.9	9.19	High	High	High	High		1.339	85.4985	114.501	87.7	83.3	112.3	116.7	0.995	0	49.05	7	801	7
FALSE	High	IsMasterProtein	ch05i_P49069	Calcium signal-modulating cyclophilin ligand OS=Homo sapiens GN=CAMLG PE=1 SV=1	0	22.687	7.43243	1	8	1	1	296	32.9	8.05	High	High	High	High		3.475	44.6889	155.311	44.7		155.3		0.311	0	8.68	1	277	1
FALSE	High	IsMasterProtein	ch10i_Q8NE86	Calcium uniporter protein, mitochondrial OS=Homo sapiens GN=MCU PE=1 SV=1	0	44.322	12.5356	3	23	3	1	351	39.8	8.65	High	High	High	High		1.381	84.0137	115.986	76.8	91.2	123.2	108.8	1.336	0	30.25	3	341	3
FALSE	High	IsMasterProtein	ch10u_A0A0U1RRK1	Calcium uptake protein 1, mitochondrial OS=Homo sapiens GN=MICU1 PE=1 SV=1	0	7.182	4.16667	2	10	2	1	480	54.9	8.27	High	Peak Found	High	High		2.213	62.2388	137.761	67.6	56.9	132.4	143.1	0.233	0	10.08	2	89	2
FALSE	High	IsMasterProtein	ch10i_A0A0A0MS52	Calcium/calmodulin-dependent protein kinase (CaM kinase) II gamma, isoform CRA_a OS=Homo sapiens GN=CAMK2G PE=1 SV=1	0	72.181	14.8423	5	36	3	1	539	60.2	7.3	High	High	High	High		1.29	87.3189	112.681	70.9	103.7	129.1	96.3	1.512	0	48.34	5	610	5
FALSE	High	IsMasterProtein	ch17i_J3KPJ3	Calcium/calmodulin-dependent protein kinase kinase 1 OS=Homo sapiens GN=CAMKK1 PE=1 SV=1	0	8.098	4.13534	1	4	1	1	532	58.8	6.1	Peak Found	Peak Found	High	High		3.109	48.6731	151.327	56	41.3	144	158.7	0.072	0	5.67	1	59	1
FALSE	High	IsMasterProtein	Q96RR4	Calcium/calmodulin-dependent protein kinase kinase 2 OS=Homo sapiens GN=CAMKK2 PE=1 SV=2	0	11.775	6.12245	2	3	2	1	588	64.7	6.68	Not Found	Peak Found	Not Found	High		6.767	25.7492	174.251		25.7		174.3	0.141	0	4.95	2	67	1
FALSE	High	IsMasterProtein	Q8IU85	Calcium/calmodulin-dependent protein kinase type 1D OS=Homo sapiens GN=CAMK1D PE=1 SV=1	0	24.979	9.61039	3	16	3	1	385	42.9	7.21	High	High	High	High		1.977	67.1861	132.814	64.6	69.8	135.4	130.2	0.688	0	13.2	3	246	3
FALSE	High	IsMasterProtein	ch05u_Q9UQM7	Calcium/calmodulin-dependent protein kinase type II subunit alpha OS=Homo sapiens GN=CAMK2A PE=1 SV=2	0	30.627	10.251	3	20	1	1	478	54.1	7.08	Not Found	Not Found	Not Found	Not Found									0.778	0	19.53	3	275	3
FALSE	High	IsMasterProtein	B7ZKY2	Calcium/calmodulin-dependent serine protein kinase (MAGUK family) OS=Homo sapiens GN=CASK PE=2 SV=1	0	35.331	10.8138	6	20	6	1	897	102	6.4	High	High	High	High		1.34	85.4669	114.533	83.3	87.7	116.7	112.3	0.286	0	14.64	6	214	6
FALSE	High	IsMasterProtein	ch12i_Q9P1Z2	Calcium-binding and coiled-coil domain-containing protein 1 OS=Homo sapiens GN=CALCOCO1 PE=1 SV=2	0	9.358	2.17077	1	4	1	1	691	77.3	4.82	Not Found	Not Found	High	Not Found		100		200			200		0.054	0	5.51	1	196	1
FALSE	High	IsMasterProtein	ch02u_Q9Y376	Calcium-binding protein 39 OS=Homo sapiens GN=CAB39 PE=1 SV=1	0	47.339	19.6481	6	36	6	1	341	39.8	6.89	High	High	High	High		2.388	59.0333	140.967	59.7	58.4	140.3	141.6	1.555	0	32.48	6	338	6
FALSE	High	IsMasterProtein	ch16i_Q9Y2V2	Calcium-regulated heat-stable protein 1 OS=Homo sapiens GN=CARHSP1 PE=1 SV=2	0	49.583	51.7007	3	24	3	1	147	15.9	8.21	High	High	High	High	Acetyl [N-Term]	1.366	84.5382	115.462	84.5	84.6	115.5	115.4	4.995	0	32.83	2	551	3
FALSE	High	IsMasterProtein	ch01i_Q9HB71	Calcyclin-binding protein OS=Homo sapiens GN=CACYBP PE=1 SV=2	0	144.461	50.8772	9	113	9	1	228	26.2	8.25	High	High	High	High	Acetyl [N-Term]	1.413	82.8844	117.116	83	82.8	117	117.2	42.94	0	126.27	8	2183	9
FALSE	High	IsMasterProtein	ch07i_Q05682	Caldesmon OS=Homo sapiens GN=CALD1 PE=1 SV=3	0	249.955	21.4376	15	134	15	1	793	93.2	5.66	High	High	High	High		1.781	71.919	128.081	71.5	72.4	128.5	127.6	5.579	0	168.08	14	2865	15
FALSE	High	IsMasterProtein	ch14u_Q96JQ2	Calmin OS=Homo sapiens GN=CLMN PE=1 SV=1	0	51.28	7.78443	5	21	5	1	1002	111.6	4.94	High	High	High	High	Acetyl [N-Term]	1.639	75.7957	124.204	74.5	77.1	125.5	122.9	0.355	0	26.01	4	458	5
FALSE	High	IsMasterProtein	ch10i_P27482	Calmodulin-like protein 3 OS=Homo sapiens GN=CALML3 PE=1 SV=2	0	8.933	18.7919	2	19	1	1	149	16.9	4.42	Not Found	Not Found	Not Found	Not Found									1.31	0	6.91	2	161	2
FALSE	High	IsMasterProtein	Q08AD1	Calmodulin-regulated spectrin-associated protein 2 OS=Homo sapiens GN=CAMSAP2 PE=1 SV=3	0	52.122	8.86501	7	20	7	1	1489	168	6.8	High	High	High	High		2.743	53.4361	146.564	54.4	52.4	145.6	147.6	0.227	0	24.97	7	326	7
FALSE	High	IsMasterProtein	D6RB85	Calnexin (Fragment) OS=Homo sapiens GN=CANX PE=1 SV=1	0	22.964	25	3	20	1	1	144	16	4.74	Peak Found	Peak Found	High	High		1.163	92.4844	107.516	92.1	92.9	107.9	107.1	2.728	0	15.62	3	400	3
FALSE	High	IsMasterProtein	ch19i_S4R3F9	Calpain small subunit 1 (Fragment) OS=Homo sapiens GN=CAPNS1 PE=1 SV=1	0	22.262	46.2963	1	3	1	1	54	5.7	6.33	High	Not Found	Peak Found	Not Found		0.891	105.769	94.2311	105.8		94.2		30.623	0			106	1
FALSE	High	IsMasterProtein	A0A0C4DGQ5	Calpain small subunit 1 OS=Homo sapiens GN=CAPNS1 PE=1 SV=1	0	150.371	29.5031	7	128	7	1	322	33.8	6.23	High	High	High	High		1.431	82.2829	117.717	81.9	82.7	118.1	117.3	16.191	0	152.14	7	3540	7
FALSE	High	IsMasterProtein	ch16i_O75808	Calpain-15 OS=Homo sapiens GN=CAPN15 PE=1 SV=1	0.002	3.54	2.20994	1	2	1	1	1086	117.2	6.71	Not Found	Peak Found	Not Found	High		3.766	41.9655	158.034		42		158	0.039	0	0	1	45	1
FALSE	High	IsMasterProtein	Q59HE3	Calpastatin isoform a variant (Fragment) OS=Homo sapiens PE=2 SV=1	0	484.244	40.8163	21	337	4	1	784	84.2	5.35	High	High	High	High		1.25	88.888	111.112	89.7	88	110.3	112	20.188	22	444.37	21	6528	21
FALSE	High	IsMasterProtein	A0A024RAN2	Calpastatin, isoform CRA_a OS=Homo sapiens GN=CAST PE=4 SV=1	0	417.638	40.7223	20	317	3	1	803	86.6	5.14	High	High	High	High		1.151	92.9897	107.01	91.6	94.3	108.4	105.7	13.925	0	412.84	20	6075	20
FALSE	High	IsMasterProtein	ch19i_B4DUT8	Calponin OS=Homo sapiens GN=CNN2 PE=1 SV=1	0	27.211	23.0303	4	26	4	1	330	35.9	7.3	High	High	High	High		1.184	91.5888	108.411	91.6	91.6	108.4	108.4	1.069	0	24.73	4	345	4
FALSE	High	IsMasterProtein	ch01i_Q15417	Calponin-3 OS=Homo sapiens GN=CNN3 PE=1 SV=1	0	25.211	14.8936	3	14	3	1	329	36.4	6.05	High	High	High	High		2.569	56.0366	143.963	55.8	56.3	144.2	143.7	0.624	0	17.61	3	243	3
FALSE	High	IsMasterProtein	V9HW88	Calreticulin, isoform CRA_b OS=Homo sapiens GN=HEL-S-99n PE=2 SV=1	0	400.094	47.0024	14	322	14	1	417	48.1	4.44	High	High	High	High		1.056	97.2648	102.735	97.1	97.4	102.9	102.6	75.668	0	394.73	14	6665	14
FALSE	High	IsMasterProtein	ch16u_P22676	Calretinin OS=Homo sapiens GN=CALB2 PE=2 SV=2	0.006	2.556	5.16605	1	2	1	1	271	31.5	5.15	High	Not Found	Peak Found	Not Found									0.129	0	0	1	0	1
FALSE	High	IsMasterProtein	Q5U0J5	cAMP responsive element binding protein 1 OS=Homo sapiens GN=CREB1 PE=2 SV=1	0	7.096	6.15836	2	8	2	1	341	36.7	5.57	High	High	High	High		1.965	67.4456	132.554	70.9	64	129.1	136	1.154	0	5.29	2	92	2
FALSE	High	IsMasterProtein	P10644	cAMP-dependent protein kinase type I-alpha regulatory subunit OS=Homo sapiens GN=PRKAR1A PE=1 SV=1	0	86.263	22.8346	8	50	7	1	381	43	5.35	High	High	High	High		6.247	27.5968	172.403	26.5	28.7	173.5	171.3	4.012	1	57.53	8	1079	8
FALSE	High	IsMasterProtein	ch15i_P56211	cAMP-regulated phosphoprotein 19 OS=Homo sapiens GN=ARPP19 PE=1 SV=2	0	41.921	55.3571	5	22	4	1	112	12.3	9.09	High	Peak Found	High	High	Acetyl [N-Term]	2.938	50.7882	149.212	50.7	50.9	149.3	149.1	12.895	1	16.82	3	258	5
FALSE	High	IsMasterProtein	Q08499	cAMP-specific 3',5'-cyclic phosphodiesterase 4D OS=Homo sapiens GN=PDE4D PE=1 SV=2	0	19.137	6.67491	4	8	4	1	809	91.1	5.54	Not Found	Not Found	High	High		100		200			200	200	0.245	0	11.69	4	142	4
FALSE	High	IsMasterProtein	ch10i_Q92887	Canalicular multispecific organic anion transporter 1 OS=Homo sapiens GN=ABCC2 PE=1 SV=3	0	37.109	6.86084	7	20	7	1	1545	174.1	8.32	Peak Found	Peak Found	High	High		2.821	52.3362	147.664	55	49.7	145	150.3	0.247	0	19.78	7	268	7
FALSE	High	IsMasterProtein	A0A024R1X0	Cancer susceptibility candidate 3, isoform CRA_a OS=Homo sapiens GN=CASC3 PE=4 SV=1	0	8.241	2.15924	1	14	1	1	741	80.4	7.17	High	High	High	High		6.869	25.4173	174.583	25.8	25	174.2	175	0.145	0	14.25	1	94	1
FALSE	High	IsMasterProtein	ch12u_P30622	CAP-Gly domain-containing linker protein 1 OS=Homo sapiens GN=CLIP1 PE=1 SV=2	0	276.433	18.7065	22	153	20	1	1438	162.1	5.36	High	High	High	High		1.994	66.8113	133.189	69.9	63.7	130.1	136.3	1.457	2	210.8	22	3486	22
FALSE	High	IsMasterProtein	A4D0V4	Capping protein (Actin filament) muscle Z-line, alpha 2 OS=Homo sapiens GN=CAPZA2 PE=2 SV=1	0	251.858	56.993	12	140	11	1	286	32.9	5.85	High	High	High	High	Acetyl [N-Term]	1.27	88.1176	111.882	88.1	88.1	111.9	111.9	250.189	1	184.02	10	3211	12
FALSE	High	IsMasterProtein	Q14444	Caprin-1 OS=Homo sapiens GN=CAPRIN1 PE=1 SV=2	0	241.946	28.7729	10	129	10	1	709	78.3	5.25	High	High	High	High		2.318	60.2862	139.714	59.7	60.9	140.3	139.1	12.043	0	162.04	10	2832	10
FALSE	High	IsMasterProtein	ch06i_Q8N1G2	Cap-specific mRNA (nucleoside-2'-O-)-methyltransferase 1 OS=Homo sapiens GN=CMTR1 PE=1 SV=1	0	14.221	5.02994	3	12	3	1	835	95.3	7.05	Peak Found	High	High	High		1.561	78.0871	121.913	62.3	93.9	137.7	106.1	0.182	0	11.73	3	87	3
FALSE	High	IsMasterProtein	ch15i_O43570	Carbonic anhydrase 12 OS=Homo sapiens GN=CA12 PE=1 SV=1	0	99.263	30.226	7	48	7	1	354	39.4	7.23	High	High	High	High		3.292	46.6024	153.398	46	47.2	154	152.8	5.494	0	66.43	7	1184	7
FALSE	High	IsMasterProtein	ch08i_P35219	Carbonic anhydrase-related protein OS=Homo sapiens GN=CA8 PE=1 SV=3	0	86.51	34.1379	6	40	6	1	290	33	4.86	High	High	High	High		2.674	54.432	145.568	54.9	53.9	145.1	146.1	6.197	0	49.9	6	874	6
FALSE	High	IsMasterProtein	ch21i_P16152	Carbonyl reductase [NADPH] 1 OS=Homo sapiens GN=CBR1 PE=1 SV=3	0	265.445	59.9278	13	165	10	1	277	30.4	8.32	High	High	High	High	Acetyl [N-Term]	1.087	95.8419	104.158	96.2	95.4	103.8	104.6	76.426	4	228.8	12	3831	13
FALSE	High	IsMasterProtein	ch21u_O75828	Carbonyl reductase [NADPH] 3 OS=Homo sapiens GN=CBR3 PE=1 SV=3	0	137.908	43.6823	9	99	6	1	277	30.8	6.18	High	High	High	High		1.102	95.1543	104.846	95.4	94.9	104.6	105.1	6.197	0	143.45	9	2230	9
FALSE	Medium	IsMasterProtein	ch01u_O75052	Carboxyl-terminal PDZ ligand of neuronal nitric oxide synthase protein OS=Homo sapiens GN=NOS1AP PE=1 SV=3	0.022	1.224	3.95257	1	2	1	1	506	56.1	6.3	Not Found	Not Found	High	Not Found		100		200			200		0.077	0	0	1	0	1
FALSE	High	IsMasterProtein	ch17i_O75976	Carboxypeptidase D OS=Homo sapiens GN=CPD PE=1 SV=2	0	39.725	6.37681	6	26	6	1	1380	152.8	6.05	Peak Found	High	High	High		6.575	26.4013	173.599	26.7	26.1	173.3	173.9	0.22	0	27.56	6	669	6
FALSE	Medium	IsMasterProtein	P14384	Carboxypeptidase M OS=Homo sapiens GN=CPM PE=1 SV=2	0.038	0.774	1.58014	1	1	1	1	443	50.5	7.36	Not Found	Not Found	Not Found	Not Found									0.093	0			0	1
FALSE	High	IsMasterProtein	ch20u_X6R8A1	Carboxypeptidase OS=Homo sapiens GN=CTSA PE=1 SV=1	0	6.76	2.61044	1	4	1	1	498	56.2	6.61	Peak Found	Peak Found	High	High		3.76	42.0207	157.979	47.7	36.3	152.3	163.7	0.096	0	5.57	1	110	1
FALSE	Medium	IsMasterProtein	B3KW79	Carboxypeptidase OS=Homo sapiens PE=2 SV=1	0.029	0.924	2.31092	1	4	1	1	476	54.1	5.6	High	High	Not Found	Not Found		0.01	200		200	200			0.093	0	3.61	1	0	1
FALSE	High	IsMasterProtein	ch09u_P43155	Carnitine O-acetyltransferase OS=Homo sapiens GN=CRAT PE=1 SV=5	0	55.239	10.3834	5	34	5	1	626	70.8	8.44	High	High	High	High		1.224	89.9288	110.071	89.1	90.8	110.9	109.2	0.805	0	36.44	5	643	5
FALSE	High	IsMasterProtein	A0A1B0GVF3	Carnitine O-palmitoyltransferase 2, mitochondrial OS=Homo sapiens GN=CPT2 PE=1 SV=1	0	54.884	10.8955	5	28	5	1	670	75.2	8.5	High	High	High	High		1.263	88.3647	111.635	84.1	92.6	115.9	107.4	0.585	0	23.29	4	604	5
FALSE	High	IsMasterProtein	ch17u_H0Y2N6	Casein kinase I isoform delta (Fragment) OS=Homo sapiens GN=CSNK1D PE=4 SV=1	0	13.704	13.3333	2	2	2	1	120	13.8	9.26	Not Found	Not Found	Not Found	Not Found									0.334	0			95	2
FALSE	High	IsMasterProtein	ch17i_P48730	Casein kinase I isoform delta OS=Homo sapiens GN=CSNK1D PE=1 SV=2	0	17.483	8.91566	3	10	3	1	415	47.3	9.74	Peak Found	Peak Found	High	High		13.918	13.4068	186.593	14.2	12.6	185.8	187.4	0.369	0	11.4	3	199	3
FALSE	High	IsMasterProtein	ch15u_U3KQB3	Casein kinase I isoform gamma-1 OS=Homo sapiens GN=CSNK1G1 PE=1 SV=1	0	6.45	6.52632	2	4	2	1	475	54.4	8.75	Not Found	Peak Found	High	High		16.2	11.9757	194.012		12	200	188	0.172	0	2.52	2	62	1
FALSE	High	IsMasterProtein	ch16i_P19784	Casein kinase II subunit alpha' OS=Homo sapiens GN=CSNK2A2 PE=1 SV=1	0	104.646	43.4286	11	44	11	1	350	41.2	8.56	High	High	High	High		1.682	74.5834	125.417	76.2	73	123.8	127	4.484	0	46.39	11	786	11
FALSE	High	IsMasterProtein	ch06u_A0A0G2JM12	Casein kinase II subunit beta OS=Homo sapiens GN=CSNK2B PE=1 SV=1	0	72.437	18.75	5	37	5	1	304	34.7	4.59	High	High	High	High	Acetyl [N-Term]	1.623	76.2461	123.754	76.3	76.2	123.7	123.8	5.813	0	57.44	4	1006	5
FALSE	High	IsMasterProtein	ch17i_Q8WXE0	Caskin-2 OS=Homo sapiens GN=CASKIN2 PE=1 SV=2	0	24.958	4.99168	3	12	3	1	1202	126.7	7.09	Peak Found	Peak Found	High	High		4.139	38.9185	161.082	38.5	39.4	161.5	160.6	0.145	0	15.15	3	180	3
FALSE	High	IsMasterProtein	Unplacedi_Q9UKL3	CASP8-associated protein 2 OS=Homo sapiens GN=CASP8AP2 PE=1 SV=1	0	7.031	2.06862	2	4	2	1	1982	222.5	6.58	Not Found	Not Found	High	High		100		200			200		0.037	0	0	2	49	2
FALSE	High	IsMasterProtein	A0A0S2Z3H1	Caspase 2 apoptosis-related cysteine peptidase isoform 1 (Fragment) OS=Homo sapiens GN=CASP2 PE=2 SV=1	0	35.188	15.0442	4	14	4	1	452	50.7	6.81	Peak Found	Peak Found	High	High	Acetyl [N-Term]	20.448	9.32498	190.675	7.8	10.9	192.2	189.1	0.359	0	20.12	3	427	4
FALSE	High	IsMasterProtein	Q9H8G2	Caspase activity and apoptosis inhibitor 1 OS=Homo sapiens GN=CAAP1 PE=1 SV=2	0	34.406	12.4654	3	16	3	1	361	38.3	4.72	High	High	High	High		3.457	44.871	155.129	54	35.8	146	164.2	1.61	0	17.67	3	353	3
FALSE	High	IsMasterProtein	ch09u_Q96LW7	Caspase recruitment domain-containing protein 19 OS=Homo sapiens GN=CARD19 PE=1 SV=1	0	5.838	5.70175	1	2	1	1	228	25.6	9.2	Peak Found	Not Found	High	Not Found		2.684	54.2913	145.709	54.3		145.7		0.233	0	2.16	1	32	1
FALSE	High	IsMasterProtein	ch04u_P55212	Caspase-6 OS=Homo sapiens GN=CASP6 PE=1 SV=2	0	32.04	16.041	3	15	3	1	293	33.3	6.93	High	High	High	High		1.092	95.5951	104.405	92.9	98.3	107.1	101.7	0.778	0	18.82	3	249	3
FALSE	High	IsMasterProtein	ch10u_A0A0A0MRL7	Caspase-7 OS=Homo sapiens GN=CASP7 PE=1 SV=1	0	33.721	9.53608	2	8	2	1	388	43.7	9.31	High	High	High	High		1.727	73.3347	126.665	78.4	68.2	121.6	131.8	0.292	0	10.9	2	490	2
FALSE	High	IsMasterProtein	ch22i_Q9BXW7	Cat eye syndrome critical region protein 5 OS=Homo sapiens GN=CECR5 PE=1 SV=1	0	40.619	13.7116	4	16	4	1	423	46.3	8.13	High	High	High	High		1.196	91.0937	108.906	95.2	86.9	104.8	113.1	0.65	0	25.27	4	408	4
FALSE	High	IsMasterProtein	ch11i_P04040	Catalase OS=Homo sapiens GN=CAT PE=1 SV=3	0	113.296	30.9298	13	79	13	1	527	59.7	7.39	High	High	High	High		1.928	68.2983	131.702	68	68.6	132	131.4	3.329	0	97.95	13	1592	13
FALSE	High	IsMasterProtein	P21964	Catechol O-methyltransferase OS=Homo sapiens GN=COMT PE=1 SV=2	0	58.731	30.6273	5	24	5	1	271	30	5.47	High	Peak Found	High	High		1.348	85.1764	114.824	84	86.3	116	113.7	1.929	0	42.61	5	557	5
FALSE	High	IsMasterProtein	ch05u_P35221	Catenin alpha-1 OS=Homo sapiens GN=CTNNA1 PE=1 SV=1	0	246.293	33.9956	21	109	21	1	906	100	6.29	High	High	High	High	Acetyl [N-Term]	6.385	27.0822	172.918	27.4	26.8	172.6	173.2	2.36	0	148.71	20	3328	21
FALSE	High	IsMasterProtein	P35222	Catenin beta-1 OS=Homo sapiens GN=CTNNB1 PE=1 SV=1	0	130.835	21.6389	10	56	9	1	781	85.4	5.86	High	High	High	High		2.25	61.5361	138.464	62	61	138	139	1.512	0	86.67	10	1230	10
FALSE	High	IsMasterProtein	ch11i_O60716	Catenin delta-1 OS=Homo sapiens GN=CTNND1 PE=1 SV=1	0	353.586	33.3678	22	178	22	1	968	108.1	6.23	High	High	High	High		2.561	56.1652	143.835	56.6	55.7	143.4	144.3	5.412	0	230.35	22	4041	22
FALSE	High	IsMasterProtein	ch08i_P07858	Cathepsin B OS=Homo sapiens GN=CTSB PE=1 SV=3	0	104.03	23.3038	6	62	6	1	339	37.8	6.3	High	High	High	High		1.576	77.6275	122.372	77.5	77.7	122.5	122.3	4.275	0	80.22	6	1593	6
FALSE	High	IsMasterProtein	V9HWI3	Cathepsin D (Lysosomal aspartyl peptidase), isoform CRA_a OS=Homo sapiens GN=HEL-S-130P PE=2 SV=1	0	97.921	27.9126	9	91	8	1	412	44.5	6.54	High	High	High	High		1.681	74.5975	125.402	74.6	74.6	125.4	125.4	6.406	1	87.18	9	1113	9
FALSE	High	IsMasterProtein	A5PLM9	Cathepsin L1 OS=Homo sapiens GN=CTSL1 PE=2 SV=1	0	9.756	8.70871	3	8	3	1	333	37.5	5.45	Not Found	Peak Found	Not Found	High		5.414	31.1815	168.819		31.2		168.8	0.701	0	10.68	3	133	3
FALSE	High	IsMasterProtein	ch01u_P25774	Cathepsin S OS=Homo sapiens GN=CTSS PE=1 SV=3	0.007	2.37	2.41692	1	2	1	1	331	37.5	8.34	Not Found	Not Found	Not Found	Not Found									0.116	0	0	1	20	1
FALSE	High	IsMasterProtein	ch20i_Q9UBR2	Cathepsin Z OS=Homo sapiens GN=CTSZ PE=1 SV=1	0	55.583	18.1518	4	33	4	1	303	33.8	7.11	High	High	High	High		1.568	77.8942	122.106	77.5	78.3	122.5	121.7	2.652	0	40.92	4	612	4
FALSE	High	IsMasterProtein	ch12i_P20645	Cation-dependent mannose-6-phosphate receptor OS=Homo sapiens GN=M6PR PE=1 SV=1	0	50.869	16.6065	3	22	3	1	277	31	5.83	High	High	High	High		1.173	92.0457	107.954	91.4	92.7	108.6	107.3	1.154	0	30.58	3	731	3
FALSE	High	IsMasterProtein	P11717	Cation-independent mannose-6-phosphate receptor OS=Homo sapiens GN=IGF2R PE=1 SV=3	0	92.891	9.51425	14	43	14	1	2491	274.2	5.94	High	High	High	High		3.456	44.8849	155.115	45.4	44.4	154.6	155.6	0.289	0	56.96	14	819	13
FALSE	High	IsMasterProtein	ch07u_Q03135	Caveolin-1 OS=Homo sapiens GN=CAV1 PE=1 SV=4	0	67.81	19.6629	2	28	2	1	178	20.5	6.02	High	High	High	High		1.341	85.4513	114.549	85.6	85.3	114.4	114.7	3.642	0	44.89	2	752	2
FALSE	High	IsMasterProtein	ch02i_Q96F85	CB1 cannabinoid receptor-interacting protein 1 OS=Homo sapiens GN=CNRIP1 PE=1 SV=1	0	12.31	9.7561	1	3	1	1	164	18.6	7.94	Not Found	Not Found	Not Found	Not Found									0.52	0	2.03	1	91	1
FALSE	High	IsMasterProtein	ch20u_P17676	CCAAT/enhancer-binding protein beta OS=Homo sapiens GN=CEBPB PE=1 SV=2	0	27.774	11.5942	3	10	3	1	345	36.1	8.31	Peak Found	Peak Found	High	High		41.27	4.73149	195.269	4.1	5.4	195.9	194.6	0.778	0	17.65	3	231	3
FALSE	High	IsMasterProtein	ch19i_P53567	CCAAT/enhancer-binding protein gamma OS=Homo sapiens GN=CEBPG PE=1 SV=1	0	12.019	20.6667	1	4	1	1	150	16.4	9.77	Not Found	Not Found	Not Found	Not Found									0.334	0	9.75	1	188	1
FALSE	High	IsMasterProtein	ch02i_Q03701	CCAAT/enhancer-binding protein zeta OS=Homo sapiens GN=CEBPZ PE=1 SV=3	0	202.148	20.1139	18	117	1	1	1054	120.9	5.94	Not Found	High	Not Found	Peak Found		2.106	64.3832	135.617	64.4	64.4	135.6	135.6	2.562	23	163.91	18	2212	17
FALSE	High	IsMasterProtein	ch17u_Q86WV7	CCDC43 protein OS=Homo sapiens GN=CCDC43 PE=1 SV=1	0	40	24.2291	4	14	4	1	227	25.5	4.92	High	High	High	High	Acetyl [N-Term]	1.5	79.9855	120.014	80.3	79.7	119.7	120.3	2.511	0	16.16	3	307	4
FALSE	High	IsMasterProtein	ch16i_A5YKK6	CCR4-NOT transcription complex subunit 1 OS=Homo sapiens GN=CNOT1 PE=1 SV=2	0	133.373	11.1111	21	74	21	1	2376	266.8	7.11	High	High	High	High		1.774	72.0971	127.903	68.7	75.5	131.3	124.5	0.524	0	86.94	21	1064	21
FALSE	High	IsMasterProtein	ch03u_Q9H9A5	CCR4-NOT transcription complex subunit 10 OS=Homo sapiens GN=CNOT10 PE=1 SV=1	0	23.393	5.51075	2	17	2	1	744	82.3	7.78	High	High	High	High	Acetyl [N-Term]	1.348	85.1655	114.834	87.2	83.1	112.8	116.9	0.271	0	9.09	1	159	2
FALSE	High	IsMasterProtein	ch02u_Q9UKZ1	CCR4-NOT transcription complex subunit 11 OS=Homo sapiens GN=CNOT11 PE=1 SV=1	0	9.304	3.92157	1	6	1	1	510	55.2	6.4	Peak Found	Not Found	High	High		5.898	31.2579	184.371	31.3		168.7	200	0.212	0	5.5	1	41	1
FALSE	High	IsMasterProtein	ch19u_O75175	CCR4-NOT transcription complex subunit 3 OS=Homo sapiens GN=CNOT3 PE=1 SV=1	0	26.569	5.04648	2	18	2	1	753	81.8	6.2	High	High	High	High		1.485	80.494	119.506	83.4	77.5	116.6	122.5	0.304	0	32.51	2	527	2
FALSE	High	IsMasterProtein	Q9ULM6	CCR4-NOT transcription complex subunit 6 OS=Homo sapiens GN=CNOT6 PE=1 SV=2	0.001	4.641	3.41113	1	4	1	1	557	63.3	7.27	Not Found	Not Found	Not Found	Not Found									0.077	0	4.44	1	75	1
FALSE	High	IsMasterProtein	Q9HC06	Cd002 protein OS=Homo sapiens PE=2 SV=1	0	10.483	12.1447	3	8	3	1	387	43.5	5.77	Peak Found	Not Found	High	High		1.432	103.517	148.242	103.5		96.5	200	0.35	0	5.07	3	64	3
FALSE	High	IsMasterProtein	Q6YHK3	CD109 antigen OS=Homo sapiens GN=CD109 PE=1 SV=2	0	14.767	2.49135	2	6	2	1	1445	161.6	5.85	Peak Found	Not Found	High	High		19.514	9.99276	195.004	10		190	200	0.061	0	8.29	2	137	2
FALSE	High	IsMasterProtein	ch11u_P48509	CD151 antigen OS=Homo sapiens GN=CD151 PE=1 SV=3	0.001	4.604	3.95257	1	4	1	1	253	28.3	7.47	Peak Found	Peak Found	High	High		4.306	37.6958	162.304	41	34.4	159	165.6	0.179	0	5.83	1	80	1
FALSE	High	IsMasterProtein	ch03u_Q13740	CD166 antigen OS=Homo sapiens GN=ALCAM PE=1 SV=2	0	88.494	18.6964	10	64	10	1	583	65.1	6.25	High	High	High	High		2.343	59.8263	140.174	59.6	60.1	140.4	139.9	2.398	0	71.08	10	1032	10
FALSE	High	IsMasterProtein	ch16u_O95400	CD2 antigen cytoplasmic tail-binding protein 2 OS=Homo sapiens GN=CD2BP2 PE=1 SV=1	0	43.239	20.2346	5	18	5	1	341	37.6	4.61	Peak Found	Peak Found	High	High		3.124	48.4965	151.504	47.2	49.8	152.8	150.2	0.896	0	27.49	5	525	5
FALSE	High	IsMasterProtein	Q9Y5K6	CD2-associated protein OS=Homo sapiens GN=CD2AP PE=1 SV=1	0	194.509	40.8451	15	148	15	1	639	71.4	6.4	High	High	High	High	Acetyl [N-Term]	1.712	73.7406	126.259	71.9	75.6	128.1	124.4	4.623	0	130.57	14	1609	15
FALSE	High	IsMasterProtein	H0YD90	CD44 antigen (Fragment) OS=Homo sapiens GN=CD44 PE=1 SV=1	0	12.262	5.64103	2	7	2	1	195	21.3	4.65	Not Found	High	Not Found	Peak Found		1.162	92.522	107.478		92.5		107.5	1.683	0			104	2
FALSE	High	IsMasterProtein	ch11i_E9PR17	CD59 glycoprotein OS=Homo sapiens GN=CD59 PE=1 SV=1	0	42.875	18.4615	3	42	3	1	130	14.5	7.77	High	High	High	High		1.728	73.3039	126.696	72.9	73.7	127.1	126.3	45.416	0	48.46	3	619	3
FALSE	High	IsMasterProtein	ch19u_P48960	CD97 antigen OS=Homo sapiens GN=CD97 PE=1 SV=4	0	20.582	5.02994	3	10	3	1	835	91.8	6.87	Peak Found	Peak Found	High	High		7.315	24.052	175.948	20.1	28	179.9	172	0.266	0	12.28	3	160	3
FALSE	High	IsMasterProtein	B2R6D8	CDC42 effector protein (Rho GTPase binding) 4, isoform CRA_a OS=Homo sapiens GN=CDC42EP4 PE=2 SV=1	0	61.478	19.382	5	50	5	1	356	38	5.19	High	High	High	High		18.245	10.3922	189.608	10.1	10.7	189.9	189.3	1.336	0	50.59	5	1828	5
FALSE	High	IsMasterProtein	Q00587	Cdc42 effector protein 1 OS=Homo sapiens GN=CDC42EP1 PE=1 SV=1	0.003	2.927	2.8133	1	2	1	1	391	40.3	7.15	Peak Found	Not Found	High	Not Found		1.169	92.2073	107.793	92.2		107.8		0.122	0	1.65	1	32	1
FALSE	High	IsMasterProtein	ch02u_Q9UKI2	Cdc42 effector protein 3 OS=Homo sapiens GN=CDC42EP3 PE=1 SV=1	0	10.572	7.08661	1	4	1	1	254	27.7	5.78	Not Found	Not Found	High	High		100		200			200	200	0.212	0	5.15	1	216	1
FALSE	High	IsMasterProtein	ch19i_Q15642	Cdc42-interacting protein 4 OS=Homo sapiens GN=TRIP10 PE=1 SV=3	0	137.205	19.9667	7	93	7	1	601	68.3	5.73	High	High	High	High		1.411	82.9606	117.039	82.1	83.8	117.9	116.2	2.875	0	86.03	7	1191	7
FALSE	High	IsMasterProtein	ch10u_Q9NZ45	CDGSH iron-sulfur domain-containing protein 1 OS=Homo sapiens GN=CISD1 PE=1 SV=1	0	33.856	13.8889	1	16	1	1	108	12.2	9.09	High	High	High	High		1.133	93.7645	106.235	94.4	93.1	105.6	106.9	3.642	0	23.58	1	487	1
FALSE	High	IsMasterProtein	Q8N5K1	CDGSH iron-sulfur domain-containing protein 2 OS=Homo sapiens GN=CISD2 PE=1 SV=1	0	48.295	30.3704	3	26	3	1	135	15.3	9.61	High	High	High	High		1.363	84.6413	115.359	78.9	90.4	121.1	109.6	3.642	0	44.7	3	655	3
FALSE	High	IsMasterProtein	ch17u_P0C7P0	CDGSH iron-sulfur domain-containing protein 3, mitochondrial OS=Homo sapiens GN=CISD3 PE=1 SV=1	0	8.922	8.66142	1	4	1	1	127	14.2	10.55	High	Not Found	High	Not Found		1.503	79.8903	120.11	79.9		120.1		0.585	0	5.99	1	88	1
FALSE	High	IsMasterProtein	Q86Y37	CDK2-associated and cullin domain-containing protein 1 OS=Homo sapiens GN=CACUL1 PE=1 SV=1	0	13.848	10.8401	2	6	2	1	369	41	5.19	Peak Found	Peak Found	High	High		4.229	38.2504	161.75	41.1	35.4	158.9	164.6	0.259	0	8.2	2	208	2
FALSE	High	IsMasterProtein	ch20i_Q96SZ6	CDK5 regulatory subunit-associated protein 1 OS=Homo sapiens GN=CDK5RAP1 PE=1 SV=2	0	14.358	4.99168	2	6	2	1	601	67.6	8.21	Not Found	Peak Found	High	High		25.135	7.80174	196.099		7.8	200	192.2	0.122	0	9.36	2	188	2
FALSE	High	IsMasterProtein	A0A0C4ZLW1	CDK5RAP2 protein OS=Homo sapiens GN=CDK5RAP2 PE=2 SV=1	0	44.834	6.07501	6	13	6	1	1893	214.9	5.58	Peak Found	Not Found	High	High		100	0.344761	199.828	0.3		199.7	200	0.122	0	15.59	6	376	5
FALSE	High	IsMasterProtein	ch14i_P51948	CDK-activating kinase assembly factor MAT1 OS=Homo sapiens GN=MNAT1 PE=1 SV=1	0	41.044	25.2427	5	20	5	1	309	35.8	6.09	High	Peak Found	High	High		8.286	21.5372	178.463	16.2	26.9	183.8	173.1	1.254	0	28.97	5	394	5
FALSE	High	IsMasterProtein	ch04u_Q9NXV6	CDKN2A-interacting protein OS=Homo sapiens GN=CDKN2AIP PE=1 SV=3	0	41.908	6.55172	2	16	2	1	580	61.1	9.01	High	High	High	High		1.33	85.833	114.167	82.2	89.5	117.8	110.5	0.292	0	21.16	2	662	2
FALSE	High	IsMasterProtein	ch05u_Q96HQ2	CDKN2AIP N-terminal-like protein OS=Homo sapiens GN=CDKN2AIPNL PE=1 SV=1	0	85.188	36.2069	3	45	3	1	116	13.2	5	High	High	High	High	Acetyl [N-Term]	1.345	85.306	114.694	84.2	86.4	115.8	113.6	22.714	0	30.02	3	966	3
FALSE	High	IsMasterProtein	B3KM34	cDNA FLJ10132 fis, clone HEMBA1003046, highly similar to Mitochondrial-processing peptidase subunit beta, mitochondrial (EC 3.4.24.64) OS=Homo sapiens PE=2 SV=1	0	90.74	20.2454	8	52	8	1	489	54.4	6.83	High	High	High	High		4.045	39.6432	160.357	41.5	37.8	158.5	162.2	1.683	0	70.7	8	1584	8
FALSE	High	IsMasterProtein	B3KM35	cDNA FLJ10144 fis, clone HEMBA1003286, highly similar to Beta-1,4-galactosyltransferase 4 (EC 2.4.1.-) OS=Homo sapiens PE=2 SV=1	0	14.368	9.88372	2	4	2	1	344	40	9.07	Not Found	Peak Found	Not Found	High		3.274	46.7962	153.204		46.8		153.2	0.212	0	6.95	2	94	2
FALSE	High	IsMasterProtein	B3KM36	cDNA FLJ10153 fis, clone HEMBA1003417, highly similar to BAG family molecular chaperone regulator 2 OS=Homo sapiens PE=2 SV=1	0	70.743	24.1706	5	45	5	1	211	23.7	6.7	High	High	High	High		1.35	85.1054	114.895	85.1	85.1	114.9	114.9	5.494	0	53.9	5	884	5
FALSE	High	IsMasterProtein	B3KM47	cDNA FLJ10273 fis, clone HEMBB1001137, highly similar to SEC23-interacting protein OS=Homo sapiens PE=2 SV=1	0	136.291	15.9	13	78	13	1	1000	111	5.45	High	High	High	High		1.277	87.8491	112.151	87.2	88.5	112.8	111.5	2.086	0	106.96	13	1177	13
FALSE	High	IsMasterProtein	B3KM57	cDNA FLJ10347 fis, clone NT2RM2001035, highly similar to CCR4-NOT transcription complex subunit 7 OS=Homo sapiens PE=2 SV=1	0	40.557	15.0877	3	18	3	1	285	32.8	4.89	High	High	High	High		1.847	70.2597	129.74	70.3	70.2	129.7	129.8	1.154	0	26.75	3	556	3
FALSE	High	IsMasterProtein	B3KM68	cDNA FLJ10398 fis, clone NT2RM4000349, highly similar to Homo sapiens basic leucine zipper and W2 domains 2 (BZW2), mRNA OS=Homo sapiens PE=2 SV=1	0	48.19	19.0931	8	43	6	1	419	48.2	6.68	High	High	High	High		1.886	69.3027	130.697	69.1	69.5	130.9	130.5	1.626	0	34.18	8	524	8
FALSE	High	IsMasterProtein	B3KM74	cDNA FLJ10425 fis, clone NT2RP1000326, highly similar to Metaxin-2 OS=Homo sapiens PE=2 SV=1	0	70.625	26.616	4	33	4	1	263	29.6	6.77	High	High	High	High	Acetyl [N-Term]	1.255	88.7092	111.291	90.1	87.4	109.9	112.6	4.878	0	35.4	3	782	4
FALSE	High	IsMasterProtein	B3KM78	cDNA FLJ10442 fis, clone NT2RP1000738, highly similar to Negative elongation factor A OS=Homo sapiens PE=2 SV=1	0	27.297	11.8738	4	14	4	1	539	58.5	9.2	High	High	High	High		1.147	93.1524	106.848	120.7	65.6	79.3	134.4	0.509	0	17.26	4	361	4
FALSE	High	IsMasterProtein	Q9NVU3	cDNA FLJ10506 fis, clone NT2RP2000510 OS=Homo sapiens PE=2 SV=1	0	112.345	21.2963	11	50	1	1	864	96.3	6.65	Peak Found	High	High	High		1.261	88.4589	111.541		88.5		111.5	1.096	0	64.45	11	917	10
FALSE	High	IsMasterProtein	B3KM88	cDNA FLJ10527 fis, clone NT2RP2000932, highly similar to Ankyrin repeat and MYND domain-containing protein 2 OS=Homo sapiens PE=2 SV=1	0	5.024	5.44218	2	4	2	1	441	49.3	6.25	High	Peak Found	Peak Found	High		2.811	52.4802	147.52	69.3	35.7	130.7	164.3	0.194	0	4.2	2	36	2
FALSE	High	IsMasterProtein	B3KM97	cDNA FLJ10554 fis, clone NT2RP2002385, highly similar to Synaptic glycoprotein SC2 OS=Homo sapiens PE=2 SV=1	0	38.393	11.6883	3	20	3	1	308	36	9.5	High	High	High	High		1.355	84.9165	115.084	82.9	86.9	117.1	113.1	1.154	0	33.55	3	329	3
FALSE	High	IsMasterProtein	B3KMC9	cDNA FLJ10711 fis, clone NT2RP3000917, highly similar to 5'-3' exoribonuclease 2 (EC 3.1.11.-) OS=Homo sapiens PE=2 SV=1	0	237.091	28.1053	20	138	20	1	950	108.5	7.47	High	High	High	High		1.746	72.833	127.167	71.8	73.8	128.2	126.2	3.642	0	170.48	19	2502	20
FALSE	High	IsMasterProtein	B3KME2	cDNA FLJ10772 fis, clone NT2RP4000243, highly similar to Cartilage-associated protein OS=Homo sapiens PE=2 SV=1	0	30.121	12.4688	4	17	4	1	401	46.5	5.85	High	High	High	High		2.74	53.4763	146.524	57.4	49.6	142.6	150.4	0.532	0	17.3	4	325	4
FALSE	High	IsMasterProtein	B3KML1	cDNA FLJ11308 fis, clone PLACE1010074, highly similar to Sorting nexin-2 OS=Homo sapiens PE=2 SV=1	0	71.832	19.0751	9	70	7	1	519	58.4	5.06	High	High	High	High		1.252	88.7985	111.201	86.3	91.3	113.7	108.7	2.981	0	69.41	9	807	9
FALSE	High	IsMasterProtein	B3KML9	cDNA FLJ11352 fis, clone HEMBA1000020, highly similar to Tubulin beta-2C chain OS=Homo sapiens PE=2 SV=1	0	436.557	55.9194	15	570	2	1	397	44.6	4.93	High	High	High	High	Acetyl [N-Term]	0.99	100.519	99.4811	101.9	99.2	98.1	100.8	999	0	585.78	14	8195	15
FALSE	High	IsMasterProtein	B3KMR5	cDNA FLJ12434 fis, clone NT2RM1000037, highly similar to Homo sapiens KIAA0690 protein OS=Homo sapiens PE=2 SV=1	0	225.431	19.4295	16	109	16	1	1297	143.6	8.75	High	High	High	High		1.701	74.0406	125.959	73.1	75	126.9	125	1.527	0	146.45	16	2397	15
FALSE	High	IsMasterProtein	B3KMR8	cDNA FLJ12445 fis, clone NT2RM1000256, highly similar to Glucosamine--fructose-6-phosphateaminotransferase (isomerizing) 2 (EC 2.6.1.16) OS=Homo sapiens PE=2 SV=1	0	98.576	20.8211	11	60	9	1	682	76.9	7.15	High	High	High	High		2.524	56.7538	143.246	54.4	59.1	145.6	140.9	1.3	0	72.98	11	1157	11
FALSE	High	IsMasterProtein	B3KMV8	cDNA FLJ12766 fis, clone NT2RP2001520, highly similar to Calcium-binding mitochondrial carrier protein Aralar1 OS=Homo sapiens PE=2 SV=1	0	62.951	11.5044	6	50	2	1	678	74.7	8.38	High	High	High	High		1.087	95.843	104.157	96	95.7	104	104.3	0.73	0	64.17	6	767	6
FALSE	High	IsMasterProtein	B3KMZ5	cDNA FLJ13047 fis, clone NT2RP3001383, highly similar to Homo sapiens ADP-ribosylation-like factor 6 interacting protein 6 (ARL6IP6), mRNA OS=Homo sapiens PE=2 SV=1	0	5.185	5.30973	1	4	1	1	226	24.6	6.33	Peak Found	Peak Found	High	High		3.805	41.621	158.379	43.6	39.7	156.4	160.3	0.334	0	4.55	1	93	1
FALSE	High	IsMasterProtein	B3KN15	cDNA FLJ13198 fis, clone NT2RP3004454, highly similar to Heparan sulfate 2-O-sulfotransferase 1 (EC 2.8.2.-) OS=Homo sapiens PE=2 SV=1	0	24.384	9.26966	2	10	2	1	356	41.8	8.69	High	High	High	High		1.653	75.3895	124.611	73.9	76.8	126.1	123.2	0.413	0	10.47	2	256	2
FALSE	High	IsMasterProtein	B3KN49	cDNA FLJ13562 fis, clone PLACE1008080, highly similar to Homo sapiens hexamethylene bis-acetamide inducible 1 (HEXIM1), mRNA OS=Homo sapiens PE=2 SV=1	0	97.26	38.9972	7	40	7	1	359	40.6	4.89	High	High	High	High	Acetyl [N-Term]	3.232	47.2583	152.742	48	46.5	152	153.5	3.642	0	53.75	6	892	7
FALSE	High	IsMasterProtein	B3KN52	cDNA FLJ13606 fis, clone PLACE1010579, highly similar to Homo sapiens GULP, engulfment adaptor PTB domain containing 1 (GULP1), mRNA OS=Homo sapiens PE=2 SV=1	0.002	3.324	2.96053	1	2	1	1	304	34.4	7.9	Peak Found	Not Found	High	Not Found		1.806	71.2809	128.719	71.3		128.7		0.116	0	1.87	1	47	1
FALSE	High	IsMasterProtein	B3KN55	cDNA FLJ13636 fis, clone PLACE1011160, highly similar to RING finger protein 14 OS=Homo sapiens PE=2 SV=1	0	9.815	6.11814	2	8	2	1	474	53.8	4.75	High	High	High	Peak Found		1.446	81.7781	118.222	78.1	85.5	121.9	114.5	0.334	0	9.17	2	106	2
FALSE	High	IsMasterProtein	B3KNB4	cDNA FLJ14168 fis, clone NT2RP2001440, highly similar to 14-3-3 protein gamma OS=Homo sapiens PE=2 SV=1	0	129.154	40.081	7	132	5	1	247	28.2	4.89	High	High	High	High	Acetyl [N-Term]	1.08	96.1517	103.848	95.9	96.4	104.1	103.6	13.678	0	176.35	6	3441	7
FALSE	High	IsMasterProtein	B3KNC3	cDNA FLJ14222 fis, clone NT2RP3003992, highly similar to Nucleolar complex protein 2 homolog OS=Homo sapiens PE=2 SV=1	0	61.762	13.3511	9	52	9	1	749	84.9	5.62	High	High	High	High		1.543	78.6437	121.356	80.3	77	119.7	123	1.61	0	62.2	9	519	9
FALSE	High	IsMasterProtein	B3KND8	cDNA FLJ14383 fis, clone HEMBA1002035, highly similar to Bromodomain adjacent to zinc finger domain protein 1A OS=Homo sapiens PE=2 SV=1	0	16.507	8.84211	3	7	1	1	475	53.9	8.98	Not Found	Not Found	Not Found	Not Found									0.28	0	8.5	2	147	3
FALSE	High	IsMasterProtein	B3KNH6	cDNA FLJ14631 fis, clone NT2RP2000660, highly similar to Homo sapiens fidgetin-like 1 (FIGNL1), mRNA OS=Homo sapiens PE=2 SV=1	0	12.957	4.45104	2	16	1	1	674	74	7.97	Not Found	Not Found	High	High		100		200			200	200	0.17	0	18.12	2	152	2
FALSE	High	IsMasterProtein	B3KNH9	cDNA FLJ14643 fis, clone NT2RP2001597, weakly similar to RYANODINE RECEPTOR, CARDIAC MUSCLE OS=Homo sapiens PE=2 SV=1	0	15.772	8.85417	3	14	3	1	576	64.1	5.5	Peak Found	Peak Found	High	High		4.909	33.8466	166.153	31.4	36.3	168.6	163.7	0.241	0	15.14	3	187	3
FALSE	High	IsMasterProtein	B3KNI2	cDNA FLJ14650 fis, clone NT2RP2002185, highly similar to Ubiquilin-1 OS=Homo sapiens PE=2 SV=1	0	178.28	23.09	8	61	4	1	589	62.4	5.11	High	High	High	High	Acetyl [N-Term]	1.946	67.891	132.109	67.6	68.2	132.4	131.8	22.714	6	93.02	7	1769	7
FALSE	High	IsMasterProtein	B3KNJ3	cDNA FLJ14684 fis, clone NT2RP2004933, highly similar to Death-associated protein kinase 3 (EC 2.7.11.1) OS=Homo sapiens PE=2 SV=1	0	10.291	5.28634	2	8	2	1	454	52.5	6.89	Not Found	Not Found	High	High		100		200			200	200	0.212	0	9.02	2	147	2
FALSE	Medium	IsMasterProtein	B3KNK0	cDNA FLJ14747 fis, A-NT2RP3002818, highly similar to Homo sapiens tigger transposable element derived 2 (TIGD2), mRNA OS=Homo sapiens PE=2 SV=1	0.011	1.922	3.04762	1	4	1	1	525	59.6	8.95	Peak Found	Peak Found	High	High		1.459	81.3361	118.664	82.5	80.1	117.5	119.9	0.086	0	0	1	0	1
FALSE	High	IsMasterProtein	B3KV24	cDNA FLJ16071 fis, clone HSYRA2001003, highly similar to Probable G-protein coupled receptor 39 OS=Homo sapiens PE=2 SV=1	0	7.95	3.31126	1	4	1	1	453	51.3	9.29	Peak Found	Peak Found	High	High		1.284	87.5537	112.446	100.7	74.4	99.3	125.6	0.105	0	3.53	1	111	1
FALSE	Medium	IsMasterProtein	Q6ZNF7	cDNA FLJ16146 fis, clone BRAMY2040159, highly similar to Homo sapiens MRIP-1 mRNA OS=Homo sapiens PE=2 SV=1	0.018	1.434	1.07672	1	4	1	1	743	81.4	7.15	Peak Found	Peak Found	High	High		1.416	82.7704	117.23	79.8	85.7	120.2	114.3	0.051	0	1.69	1	25	1
FALSE	High	IsMasterProtein	Q6ZN96	cDNA FLJ16308 fis, clone PUAEN2006335 OS=Homo sapiens PE=1 SV=1	0	18.023	8.27465	4	14	1	1	568	63.6	8.79	Not Found	Not Found	Not Found	High		100		200				200	0.322	0	13.46	4	157	4
FALSE	High	IsMasterProtein	B3KVH4	cDNA FLJ16549 fis, clone PLACE7003657, highly similar to RAC-alpha serine/threonine-protein kinase (EC 2.7.11.1) OS=Homo sapiens PE=2 SV=1	0	45.314	13.5417	4	20	2	1	480	55.6	6.07	High	High	High	High		1.697	74.1457	125.854	70.9	77.4	129.1	122.6	0.484	0	23.43	4	504	4
FALSE	High	IsMasterProtein	Q6ZMY0	cDNA FLJ16598 fis, clone TESTI4006473, weakly similar to ATP-dependent RNA helicase A OS=Homo sapiens PE=2 SV=1	0	81.9	11.6418	10	35	1	1	1340	150.9	8.22	High	High	High	High		1.316	86.3404	113.66	90.2	82.5	109.8	117.5	0.416	0	39.89	10	814	9
FALSE	High	IsMasterProtein	B3KY60	cDNA FLJ16777 fis, clone BRHIP2029567, highly similar to Cell division cycle 5-like protein OS=Homo sapiens PE=2 SV=1	0	170.287	33.2918	16	76	16	1	802	92.2	8.18	High	High	High	High		1.708	73.8565	126.143	75.4	72.3	124.6	127.7	2.082	0	116.66	16	1827	16
FALSE	High	IsMasterProtein	Q9NX34	cDNA FLJ20465 fis, clone KAT06236 OS=Homo sapiens PE=2 SV=1	0	199.715	38.5475	7	89	2	1	179	19.4	4.7	High	High	Peak Found	Peak Found	Acetyl [N-Term]	1.143	93.3124	106.688	91.2	95.4	108.8	104.6	62.096	0	145.53	6	3790	7
FALSE	High	IsMasterProtein	B3KNP2	cDNA FLJ30079 fis, clone BGGI12000544, highly similar to Snurportin-1 (RNA U transporter 1) OS=Homo sapiens PE=2 SV=1	0	12.844	3.9801	1	8	1	1	402	45.8	8.09	Peak Found	Peak Found	High	High		5.994	28.5944	171.406	40.3	16.8	159.7	183.2	0.259	0	9.92	1	101	1
FALSE	High	IsMasterProtein	B3KNS8	cDNA FLJ30322 fis, clone BRACE2006703, highly similar to Surfeit locus protein 6 OS=Homo sapiens PE=2 SV=1	0	35.307	15.2355	2	10	2	1	361	41.5	10.59	High	High	High	High		1.293	87.2204	112.78	92.5	81.9	107.5	118.1	0.438	0	21.14	2	380	2
FALSE	Medium	IsMasterProtein	B3KNS9	cDNA FLJ30326 fis, clone BRACE2007174, highly similar to Zinc finger protein 250 OS=Homo sapiens PE=2 SV=1	0.018	1.436	4.10714	1	2	1	1	560	63.4	8.28	Not Found	Not Found	Not Found	Not Found									0.066	0	0	1	0	1
FALSE	High	IsMasterProtein	B3KNV5	cDNA FLJ30542 fis, clone BRAWH2001378, highly similar to Rattus norvegicus SH2-B PH domain containing signaling mediator 1 (Sh2bpsm1), transcript variant 1, mRNA OS=Homo sapiens PE=2 SV=1	0	8.753	7.80423	2	18	2	1	756	79.3	5.48	Peak Found	Not Found	High	Not Found		1.859	69.954	130.046	70		130		0.145	0	3.36	2	61	2
FALSE	Medium	IsMasterProtein	B3KNW5	cDNA FLJ30599 fis, clone BRAWH2009298, highly similar to Homo sapiens hyaluronan binding protein 4 (HABP4), mRNA OS=Homo sapiens PE=2 SV=1	0.018	1.44	5.69106	1	2	1	1	123	14	7.42	Peak Found	Not Found	High	Not Found		1.597	77.0136	122.986	77		123		0.334	0	1.61	1	17	1
FALSE	High	IsMasterProtein	B3KP06	cDNA FLJ30880 fis, clone FEBRA2004767, highly similar to Breast cancer anti-estrogen resistance protein 3 OS=Homo sapiens PE=2 SV=1	0	12.734	3.15152	2	4	2	1	825	92.5	7.84	Not Found	Not Found	High	High		100		200			200		0.08	0	5.48	2	65	2
FALSE	Medium	IsMasterProtein	B3KP18	cDNA FLJ30946 fis, clone FEBRA2007622, highly similar to RAD50-interacting protein 1 OS=Homo sapiens PE=2 SV=1	0.018	1.48	1.51515	1	2	1	1	792	90.5	5.45	Not Found	Peak Found	Not Found	High		1.77	72.2146	127.785		72.2		127.8	0.059	0	0	1	0	1
FALSE	High	IsMasterProtein	B3KP31	cDNA FLJ31047 fis, clone HSYRA2000424, highly similar to Carbohydrate kinase-like protein (EC 2.7.1.-) OS=Homo sapiens PE=2 SV=1	0	66.168	19.6653	6	30	6	1	478	51.5	6.83	High	High	High	High	Acetyl [N-Term]	1.391	83.648	116.352	79.4	87.9	120.6	112.1	1.462	0	37.94	5	1080	6
FALSE	High	IsMasterProtein	B3KP47	cDNA FLJ31151 fis, clone IMR322001541, highly similar to Probable ribosome biogenesis protein RLP24 OS=Homo sapiens PE=2 SV=1	0.001	4.614	7.36196	1	4	1	1	163	19.6	9.86	High	High	Peak Found	Peak Found		6.696	25.9865	174.013	27	25	173	175	0.468	0	4.34	1	37	1
FALSE	High	IsMasterProtein	B3KP90	cDNA FLJ31447 fis, clone NT2NE2000913, highly similar to Protein phosphatase 2C isoform beta (EC 3.1.3.16) OS=Homo sapiens PE=2 SV=1	0	58.377	18.3716	6	42	5	1	479	52.7	5.05	High	High	High	High		1.692	74.2816	125.718	70.7	77.9	129.3	122.1	1.555	1	47.42	6	419	6
FALSE	High	IsMasterProtein	B3KPM8	cDNA FLJ31974 fis, clone NT2RP7008167, weakly similar to 85.1 kDa PROTEIN IN GREB-FEOA INTERGENIC REGION OS=Homo sapiens PE=2 SV=1	0	10.293	2.31156	2	6	2	1	995	111.7	8.72	High	Peak Found	High	High		1.832	70.6228	129.377	70.6		129.4		0.112	0	6.73	2	69	2
FALSE	High	IsMasterProtein	B3KPX5	cDNA FLJ32418 fis, clone SKMUS2000863, weakly similar to PROBABLE ASPARAGINYL-TRNA SYNTHETASE (EC 6.1.1.22) OS=Homo sapiens PE=2 SV=1	0	14.037	6.49895	3	12	3	1	477	54	7.24	High	High	High	Peak Found		1.405	83.1558	116.844	82.9	83.4	117.1	116.6	0.359	0	10.64	3	137	3
FALSE	High	IsMasterProtein	B3KPZ8	cDNA FLJ32530 fis, clone SMINT2000185, highly similar to TRANSKETOLASE (EC 2.2.1.1) OS=Homo sapiens PE=2 SV=1	0	536.679	64.8045	21	605	2	1	358	38.9	7.72	High	High	High	Peak Found		1.078	96.2391	103.761	104.6	87.9	95.4	112.1	2309.13	0	775.2	20	13073	21
FALSE	High	IsMasterProtein	B3KQY7	cDNA FLJ33305 fis, clone BNGH42003529, highly similar to E3 ubiquitin protein ligase TRAF7 (EC 6.3.2.-) OS=Homo sapiens PE=2 SV=1	0.007	2.38	1.64179	1	4	1	1	670	74.5	7.15	Peak Found	Peak Found	High	High		1.796	71.536	128.464	70.8	72.3	129.2	127.7	0.058	0	1.71	1	16	1
FALSE	High	IsMasterProtein	B3KRB2	cDNA FLJ33964 fis, clone CTONG2019029, highly similar to Pseudouridylate synthase 7 homolog (EC 5.4.99.-) OS=Homo sapiens PE=2 SV=1	0	147.263	31.4675	13	70	13	1	661	75	6.37	High	High	High	High		1.552	78.3659	121.634	80.3	76.4	119.7	123.6	2.938	0	86.69	13	993	13
FALSE	High	IsMasterProtein	B3KRI8	cDNA FLJ34373 fis, clone FEBRA2017333, highly similar to Dual specificity protein kinase CLK3 (EC 2.7.12.1) OS=Homo sapiens PE=2 SV=1	0.007	2.499	1.25392	1	2	1	1	638	73.5	9.95	Not Found	Not Found	Not Found	Not Found									0.058	0	1.64	1	26	1
FALSE	High	IsMasterProtein	B3KRU1	cDNA FLJ34919 fis, clone NT2RP7002779, highly similar to Leucine-rich repeat-containing protein 8D OS=Homo sapiens PE=2 SV=1	0	7.723	4.77855	3	8	3	1	858	98.2	7.62	Peak Found	High	High	High	Acetyl [N-Term]	2.999	50.0128	149.987	26.5	73.5	173.5	126.5	0.148	0	5.56	3	0	3
FALSE	High	IsMasterProtein	B3KRW4	cDNA FLJ34980 fis, clone OCBBF2000522, highly similar to Rab GTPase-binding effector protein 2 OS=Homo sapiens PE=2 SV=1	0	21.397	5.27241	3	7	3	1	569	63.5	4.78	High	High	Peak Found	Peak Found	Acetyl [N-Term]	1.435	82.132	117.868	81.8	82.5	118.2	117.5	0.301	0	0	1	216	3
FALSE	High	IsMasterProtein	B3KSE0	cDNA FLJ36069 fis, clone TESTI2019406, highly similar to HEME OXYGENASE 2 (EC 1.14.99.3) OS=Homo sapiens PE=2 SV=1	0	46.243	16.4557	3	20	3	1	316	35.9	5.5	High	High	High	High	Acetyl [N-Term]	1.212	90.4053	109.595	90.9	89.9	109.1	110.1	1.154	0	16.22	2	713	3
FALSE	High	IsMasterProtein	B3KSH8	cDNA FLJ36241 fis, clone THYMU2001622, highly similar to Inositol polyphosphate 1-phosphatase (EC 3.1.3.57) OS=Homo sapiens PE=2 SV=1	0	5.882	3.00752	1	4	1	1	399	44	5.26	Peak Found	Peak Found	High	High		1.585	77.3817	122.618	75.2	79.6	124.8	120.4	0.096	0	3.95	1	39	1
FALSE	High	IsMasterProtein	Q53FE8	cDNA FLJ36526 fis, clone TRACH2003347, highly similar to NSFL1 cofactor p47 (Fragment) OS=Homo sapiens PE=2 SV=1	0	227.831	38.1081	12	152	12	1	370	40.5	5.14	High	High	High	High		1.304	86.7937	113.206	86.5	87.1	113.5	112.9	16.783	0	218.18	12	4059	12
FALSE	High	IsMasterProtein	B3KSZ4	cDNA FLJ37346 fis, clone BRAMY2021310, highly similar to Transcriptional repressor p66 beta OS=Homo sapiens PE=2 SV=1	0	34.322	12.6476	4	22	4	1	593	65.2	9.74	Peak Found	High	High	High		9.142	19.7209	180.279	15.9	23.5	184.1	176.5	0.365	0	32	4	365	4
FALSE	High	IsMasterProtein	B3KTJ9	cDNA FLJ38393 fis, clone FEBRA2007212 OS=Homo sapiens PE=2 SV=1	0	246.134	38.3532	19	128	19	1	923	102.9	5.22	High	High	High	High		1.376	84.1899	115.81	85.6	82.8	114.4	117.2	2.981	0	186.49	19	2307	19
FALSE	High	IsMasterProtein	B3KTL8	cDNA FLJ38476 fis, clone FEBRA2022504, highly similar to YTH domain protein 1 OS=Homo sapiens PE=2 SV=1	0	45.334	13.059	4	20	4	1	559	60.8	8.9	High	High	High	High		2.747	53.3803	146.62	52.7	54	147.3	146	1.015	0	21.49	4	285	4
FALSE	High	IsMasterProtein	B3KTN5	cDNA FLJ38538 fis, clone HCHON2001407, highly similar to LanC-like protein 2 OS=Homo sapiens PE=2 SV=1	0	26.73	10.8889	3	10	3	1	450	50.8	7.59	High	High	High	Peak Found		1.336	85.6286	114.371	87.9	83.4	112.1	116.6	0.468	0	11.26	3	283	3
FALSE	High	IsMasterProtein	B3KTR4	cDNA FLJ38643 fis, clone HHDPC2005513, highly similar to ARF-related protein 1 OS=Homo sapiens PE=2 SV=1	0	5.879	6.46766	1	2	1	1	201	22.6	7.56	Not Found	High	Not Found	Not Found									0.194	0	2.7	1	54	1
FALSE	High	IsMasterProtein	B3KTS4	cDNA FLJ38665 fis, clone HLUNG2003378, highly similar to Rho guanine nucleotide exchange factor 16 OS=Homo sapiens PE=2 SV=1	0	11.064	1.97461	1	4	1	1	709	80.1	7.52	Not Found	High	Not Found	High		1.338	85.5339	114.466		85.5		114.5	0.125	0	5.67	1	52	1
FALSE	High	IsMasterProtein	B3KTT0	cDNA FLJ38675 fis, clone IMR322000243, highly similar to Nucleoporin Nup43 OS=Homo sapiens PE=2 SV=1	0	93.458	24.2105	6	46	6	1	380	42.1	5.54	High	High	High	High		1.305	86.7625	113.238	87.9	85.6	112.1	114.4	9	0	62.7	6	1072	6
FALSE	High	IsMasterProtein	B3KU05	cDNA FLJ39026 fis, clone NT2RP7005675 OS=Homo sapiens PE=2 SV=1	0	17.907	2.64784	2	12	2	1	1133	128.8	7.27	High	High	High	High		1.482	80.5847	119.415	82.1	79.1	117.9	120.9	0.12	0	13.18	2	77	2
FALSE	High	IsMasterProtein	B3KUE6	cDNA FLJ39696 fis, clone SMINT2011033, highly similar to Sorting and assembly machinery component 50 homolog OS=Homo sapiens PE=2 SV=1	0	24	17.5182	4	23	1	1	274	30.2	8.62	High	High	Peak Found	Peak Found		1.062	96.9775	103.022	99.2	94.8	100.8	105.2	0.995	0	21.29	4	235	4
FALSE	High	IsMasterProtein	B3KUH1	cDNA FLJ39884 fis, clone SPLEN2016304 OS=Homo sapiens PE=2 SV=1	0.005	2.714	9.58904	1	2	1	1	146	16.6	9.09	Peak Found	Not Found	High	Not Found		2.002	66.6125	133.387	66.6		133.4		0.259	0	2.77	1	0	1
FALSE	High	IsMasterProtein	B3KUJ7	cDNA FLJ40064 fis, clone TESOP2000312, highly similar to LAS1-like protein OS=Homo sapiens PE=2 SV=1	0	7.602	11.5254	2	6	1	1	295	34.2	5.2	Not Found	Not Found	Not Found	Not Found									0.259	0	3.98	2	58	2
FALSE	High	IsMasterProtein	B3KVU5	cDNA FLJ41463 fis, clone BRSTN2017237 OS=Homo sapiens PE=2 SV=1	0	63.255	13.7131	4	31	1	1	474	53.5	4.5	Not Found	Peak Found	Not Found	High		1.951	67.769	132.231	66.2	69.3	133.8	130.7	1.154	6	39.18	4	674	4
FALSE	High	IsMasterProtein	B3KWN0	cDNA FLJ43389 fis, clone OCBBF2007068, highly similar to Ankyrin repeat domain-containing protein 52 OS=Homo sapiens PE=2 SV=1	0	48.648	9.47955	7	23	7	1	1076	115	6.51	High	Not Found	High	High		26.873	7.30646	196.347	7.3		192.7	200	0.526	0	17.16	7	322	7
FALSE	High	IsMasterProtein	B3KWV6	cDNA FLJ43948 fis, clone TESTI4014924, highly similar to Homo sapiens cytoplasmic FMR1 interacting protein 1 (CYFIP1), transcript variant 1, mRNA OS=Homo sapiens PE=2 SV=1	0	74.533	10.3586	11	50	6	1	1255	145.4	7.61	High	High	High	High		1.825	70.7917	129.208	71.2	70.4	128.8	129.6	0.557	6	52.45	11	618	11
FALSE	High	IsMasterProtein	B3KWY9	cDNA FLJ44288 fis, clone TRACH2008820, highly similar to Homo sapiens ring finger protein 10 (RNF10), mRNA OS=Homo sapiens PE=2 SV=1	0	8.097	1.91388	1	4	1	1	836	92.7	7.59	Not Found	Not Found	High	High									0.054	0	5.84	1	156	1
FALSE	High	IsMasterProtein	B3KX05	cDNA FLJ44412 fis, clone UTERU1000249, highly similar to WW domain-containing protein 1 OS=Homo sapiens PE=2 SV=1	0	47.332	13.1285	6	24	6	1	716	79.5	7.43	High	Peak Found	High	High		5.089	32.8445	167.155	45.4	20.3	154.6	179.7	0.624	0	22.15	6	475	6
FALSE	High	IsMasterProtein	B3KX14	cDNA FLJ44463 fis, clone UTERU2024969, highly similar to Mortality factor 4-like protein 2 OS=Homo sapiens PE=2 SV=1	0	36.782	14.5833	4	33	4	1	288	32.3	9.72	Peak Found	Peak Found	High	High		7.556	23.3767	176.623	21.7	25	178.3	175	0.833	0	28.5	4	826	4
FALSE	High	IsMasterProtein	B3KXA2	cDNA FLJ45031 fis, clone BRAWH3018548, highly similar to Vinculin OS=Homo sapiens PE=2 SV=1	0	563.292	40.7555	33	383	1	1	1006	110.2	6.25	Peak Found	Peak Found	High	High		1.347	85.2103	114.79	81.7	88.7	118.3	111.3	8.72	0	511.12	33	8754	33
FALSE	High	IsMasterProtein	B3KXA3	cDNA FLJ45033 fis, clone BRAWH3019026, highly similar to Homo sapiens echinoderm microtubule associated protein like 1 (EML1), transcript variant 1, mRNA OS=Homo sapiens PE=2 SV=1	0	38.241	9.59233	7	28	7	1	834	92	7.43	High	High	High	High		1.78	71.9365	128.063	74.8	69.1	125.2	130.9	0.557	0	29.1	7	316	7
FALSE	High	IsMasterProtein	B3KXN9	cDNA FLJ45793 fis, clone NT2RI2009233 OS=Homo sapiens PE=2 SV=1	0	33.234	14.8148	2	12	2	1	270	29.8	6.04	Peak Found	Peak Found	High	High		2.804	52.5748	147.425	54.4	50.7	145.6	149.3	0.624	0	14.02	2	383	2
FALSE	High	IsMasterProtein	B3KXP1	cDNA FLJ45802 fis, clone NT2RI3001967, highly similar to Ankyrin repeat and SAM domain-containing protein 6 OS=Homo sapiens PE=2 SV=1	0.002	3.515	4.14201	1	4	1	1	676	72.5	8.97	Not Found	Peak Found	High	High		3.644	43.0692	156.931		43.1		156.9	0.058	0	0	1	23	1
FALSE	High	IsMasterProtein	Q6ZS38	cDNA FLJ45860 fis, clone OCBBF2036019, moderately similar to NADH-ubiquinone oxidoreductase 20 kDa subunit, mitochondrial (EC 1.6.5.3) OS=Homo sapiens PE=2 SV=1	0	11.844	6.80272	1	6	1	1	294	32	8.53	Peak Found	Not Found	High	High		4.052	43.9388	178.031	43.9		156.1	200	0.778	0	8.57	1	49	1
FALSE	Medium	IsMasterProtein	Q6ZRZ8	cDNA FLJ45949 fis, clone PLACE7007973 OS=Homo sapiens PE=2 SV=1	0.048	0.738	1.24224	1	2	1	1	483	54.4	8.38	High	Not Found	Peak Found	Not Found		1.284	87.5552	112.445	87.6		112.4		0.08	0	0	1	0	1
FALSE	High	IsMasterProtein	B3KXW2	cDNA FLJ46178 fis, clone TESTI4003944, highly similar to Homo sapiens zinc finger protein 532 (ZNF532), mRNA OS=Homo sapiens PE=2 SV=1	0.001	4.695	2.15219	1	8	1	1	1301	141.6	8.65	High	High	High	High		5.19	32.3092	167.691	31.3	33.3	168.7	166.7	0.062	0	0	1	44	1
FALSE	High	IsMasterProtein	B3KXW5	cDNA FLJ46199 fis, clone TESTI4007965, highly similar to AP-1 complex subunit gamma-1 OS=Homo sapiens PE=2 SV=1	0	56.955	15.503	9	40	9	1	845	94.1	7.05	High	High	High	High		1.311	86.5243	113.476	89.8	83.2	110.2	116.8	0.823	0	36.22	9	580	9
FALSE	High	IsMasterProtein	B3KXY9	cDNA FLJ46359 fis, clone TESTI4049786, highly similar to Hexokinase-1 (EC 2.7.1.1) OS=Homo sapiens PE=2 SV=1	0	212.377	21.2185	16	100	14	1	952	106.2	7.17	High	High	High	High		1.128	94.0029	105.997	91.9	96.1	108.1	103.9	2.562	3	135.73	16	2158	16
FALSE	High	IsMasterProtein	B3KY51	cDNA FLJ46863 fis, clone UTERU3011558 OS=Homo sapiens PE=2 SV=1	0	57.708	10.1719	5	20	5	1	698	78.4	8.66	High	High	High	High		1.889	69.2351	130.765	77.4	61.1	122.6	138.9	0.585	0	28.91	5	579	5
FALSE	High	IsMasterProtein	B4E290	cDNA FLJ50039, highly similar to Homo sapiens solute carrier family 25, member 24, transcript variant 1, mRNA OS=Homo sapiens PE=2 SV=1	0	41.696	14.8847	6	28	6	1	477	53.3	6.61	High	High	High	High		0.907	104.857	95.1432	102.3	107.4	97.7	92.6	0.848	0	30.26	6	509	6
FALSE	High	IsMasterProtein	B7Z6V4	cDNA FLJ50239, highly similar to Arylsulfatase E (EC 3.1.6.-) OS=Homo sapiens PE=2 SV=1	0.002	3.309	3.74593	2	8	2	1	614	68.1	7.08	Peak Found	Peak Found	High	High		2.247	61.6	138.4	65.2	58	134.8	142	0.15	0	0	2	42	2
FALSE	Medium	IsMasterProtein	B4DW03	cDNA FLJ50255 OS=Homo sapiens PE=2 SV=1	0.026	1.045	21.9858	1	3	1	1	141	15.1	8.34	Not Found	Not Found	Not Found	Not Found									0.389	0	0	1	0	1
FALSE	Medium	IsMasterProtein	B7Z993	cDNA FLJ50380, highly similar to Zinc finger protein 418 OS=Homo sapiens PE=2 SV=1	0.049	0.723	2.02492	1	4	1	1	642	74.2	8.79	High	High	Not Found	Not Found		0.01	200		200				0.058	0	1.64	1	22	1
FALSE	High	IsMasterProtein	B4DS24	cDNA FLJ50635, highly similar to ATP-dependent RNA helicase DDX19A (EC 3.6.1.-) OS=Homo sapiens PE=2 SV=1	0	75.303	26.1745	9	58	1	1	447	50.4	6.58	High	High	Peak Found	Peak Found	Acetyl [N-Term]	1.19	91.3072	108.693	92.5	90.1	107.5	109.9	1.477	0	69.47	8	1522	9
FALSE	High	IsMasterProtein	B7Z532	cDNA FLJ51028, highly similar to 60 kDa heat shock protein, mitochondrial OS=Homo sapiens PE=2 SV=1	0	351.17	68.9796	13	368	1	1	245	26.7	5.22	High	Not Found	Peak Found	Not Found		1.057	97.2103	102.79	97.2		102.8		1846.85	0	561.74	12	9324	13
FALSE	High	IsMasterProtein	B4E284	cDNA FLJ51188, highly similar to N-acetylglucosamine-6-sulfatase (EC3.1.6.14) OS=Homo sapiens PE=2 SV=1	0	41.858	7.87671	4	30	4	1	584	65.8	8.07	High	High	High	High		2.456	57.8623	142.138	63.1	52.7	136.9	147.3	0.812	0	36.41	4	406	4
FALSE	High	IsMasterProtein	B4DJL3	cDNA FLJ51219, highly similar to Homo sapiens mediator of RNA polymerase II transcription, subunit 18 homolog (MED18), mRNA OS=Homo sapiens PE=2 SV=1	0.002	3.373	4.65116	1	2	1	1	215	24.4	6.54	Not Found	Not Found	Not Found	Not Found									0.292	0	2.04	1	32	1
FALSE	High	IsMasterProtein	B4DJS6	cDNA FLJ51221, highly similar to Ubiquitin-protein ligase RMA1 (EC 6.3.2.-) OS=Homo sapiens PE=2 SV=1	0	12.253	8.24176	1	3	1	1	182	20.2	8.21	High	Not Found	Peak Found	Not Found	Acetyl [N-Term]								0.585	0			181	1
FALSE	High	IsMasterProtein	B4DY32	cDNA FLJ51387, highly similar to Asparagine synthetase (glutamine-hydrolyzing) (EC 6.3.5.4) OS=Homo sapiens PE=2 SV=1	0	133.977	25.9414	10	104	1	1	478	54.8	6.4	High	High	High	High		2.608	55.438	144.562	48.2	62.7	151.8	137.3	4.233	0	127.89	10	1466	10
FALSE	High	IsMasterProtein	B4DLJ3	cDNA FLJ51495, highly similar to ADP-ribosylation factor 5 OS=Homo sapiens PE=2 SV=1	0	125.326	36.6812	7	127	2	1	229	25.4	7.66	High	High	High	High		1.488	80.3939	119.606	82.2	78.6	117.8	121.4	16.013	0	182.21	7	2312	7
FALSE	High	IsMasterProtein	B4DKM0	cDNA FLJ51883, highly similar to Mitochondrial 39S ribosomal protein L3 OS=Homo sapiens PE=2 SV=1	0	33.498	24	5	24	5	1	375	41.6	9.58	High	High	High	High		1.367	84.4946	115.505	82.2	86.8	117.8	113.2	0.905	0	23.15	5	139	5
FALSE	High	IsMasterProtein	B4DQ06	cDNA FLJ51932 OS=Homo sapiens PE=2 SV=1	0	29.58	13.2911	1	12	1	1	158	17.7	11.36	High	High	High	High		1.555	78.2923	121.708	78.3	78.2	121.7	121.8	1.154	0	19.99	1	229	1
FALSE	High	IsMasterProtein	B4DQL5	cDNA FLJ52245, highly similar to Homo sapiens estrogen-related receptor beta like 1 (ESRRBL1), mRNA OS=Homo sapiens PE=2 SV=1	0	19.763	3.91304	1	3	1	1	460	52.2	5	High	Not Found	Peak Found	Not Found	Acetyl [N-Term]	5.018	33.231	166.769	33.2		166.8		0.179	0			313	1
FALSE	High	IsMasterProtein	B4DX46	cDNA FLJ52663, highly similar to SET and MYND domain-containing protein 5 OS=Homo sapiens PE=2 SV=1	0	41.489	21.0526	5	20	5	1	418	47.3	5.05	High	High	High	High		1.315	86.4084	113.592	85.4	87.5	114.6	112.5	1.154	0	30.43	5	244	5
FALSE	High	IsMasterProtein	B4DXI4	cDNA FLJ52689, highly similar to Homo sapiens mitochondrial ribosomal protein L21 (MRPL21), transcript variant 4, mRNA OS=Homo sapiens PE=2 SV=1	0	43.366	14.6429	2	22	2	1	280	30.6	10.46	High	High	High	High		1.358	84.8088	115.191	83.5	86.2	116.5	113.8	0.968	0	32.19	2	515	2
FALSE	High	IsMasterProtein	B4DMJ5	cDNA FLJ53012, highly similar to Tubulin beta-7 chain OS=Homo sapiens PE=2 SV=1	0	509.503	74.3802	15	474	1	1	242	27.3	4.5	Not Found	Not Found	Not Found	High	Acetyl [N-Term]								657932	0	709	14	9318	15
FALSE	High	IsMasterProtein	B4DNB9	cDNA FLJ53069, highly similar to AP-2 complex subunit mu-1 OS=Homo sapiens PE=2 SV=1	0	63.574	9.13043	3	38	3	1	460	52.3	9.5	High	High	High	High		1.341	85.4486	114.551	84.7	86.2	115.3	113.8	0.951	0	44.12	3	933	3
FALSE	High	IsMasterProtein	B4DUJ6	cDNA FLJ53099, highly similar to Beta-enolase (EC 4.2.1.11) OS=Homo sapiens PE=2 SV=1	0	85.255	30.0366	6	119	1	1	273	29.5	5.71	High	Not Found	Peak Found	Not Found		2.015	66.3436	133.656	66.3		133.7		6.356	0	140.71	6	3105	5
FALSE	High	IsMasterProtein	B4DUT2	cDNA FLJ53206 OS=Homo sapiens PE=2 SV=1	0	52.721	6.86922	4	26	4	1	757	88.1	5.35	High	High	High	High		1.591	77.1815	122.818	76.6	77.8	123.4	122.2	0.585	0	32.49	4	698	4
FALSE	High	IsMasterProtein	B4DH07	cDNA FLJ53321, highly similar to Homo sapiens pitrilysin metallopeptidase 1 (PITRM1), mRNA OS=Homo sapiens PE=2 SV=1	0	239.762	25.6311	16	142	13	1	1030	116.2	6.67	High	High	High	High		1.259	88.5378	111.462	88	89.1	112	110.9	2.58	7	168.93	16	2831	16
FALSE	High	IsMasterProtein	B4DT31	cDNA FLJ53425, highly similar to Far upstream element-binding protein 1 OS=Homo sapiens PE=2 SV=1	0	196.471	25.7143	11	139	10	1	665	69.8	7.36	High	High	High	High	Acetyl [N-Term]	1.153	92.886	107.114	92.8	92.9	107.2	107.1	4.796	0	140.01	10	3782	11
FALSE	High	IsMasterProtein	B4DV95	cDNA FLJ53438, highly similar to Dual specificity mitogen-activated protein kinase kinase 7 (EC 2.7.12.2) OS=Homo sapiens PE=2 SV=1	0	8.509	5.74713	2	4	2	1	435	49	9.22	Not Found	Peak Found	Not Found	High									0.194	0	4.63	2	53	2
FALSE	High	IsMasterProtein	B7Z2B0	cDNA FLJ53470, highly similar to Calcium/calmodulin-dependent protein kinase type II delta chain (EC 2.7.11.17) OS=Homo sapiens PE=2 SV=1	0	80.139	14.8218	5	50	3	1	533	60	7.27	High	High	High	High		1.198	91.0039	108.996	90.8	91.2	109.2	108.8	1.371	4	67.77	5	1323	5
FALSE	High	IsMasterProtein	B7Z4N1	cDNA FLJ53906, highly similar to Tubulin beta chain OS=Homo sapiens PE=2 SV=1	0	426.404	51.1299	14	517	1	1	354	39.9	4.97	High	High	High	High	Acetyl [N-Term]	100		200			200	200	2781.56	0	509.23	13	6766	14
FALSE	High	IsMasterProtein	B7Z481	cDNA FLJ54018, highly similar to PDZ and LIM domain protein 5 OS=Homo sapiens PE=2 SV=1	0	204.783	32.9114	11	111	2	1	474	51.2	7.78	High	High	High	High		1.277	87.8456	112.154	87.6	88.1	112.4	111.9	13.454	0	153.5	11	2312	11
FALSE	High	IsMasterProtein	B4E0L0	cDNA FLJ54030, highly similar to Polymerase delta-interacting protein 3 OS=Homo sapiens PE=2 SV=1	0	93.918	38.5845	11	44	11	1	438	48.1	9.92	High	High	High	High	Acetyl [N-Term]	3.83	41.4057	158.594	41.2	41.6	158.8	158.4	2.162	0	58.79	10	864	11
FALSE	High	IsMasterProtein	B4DYZ7	cDNA FLJ54316, highly similar to DNA polymerase subunit delta 3 OS=Homo sapiens PE=2 SV=1	0	60.852	18.4549	6	33	6	1	466	51.3	9.38	High	High	High	High	Acetyl [N-Term]	1.855	70.043	129.957	67.4	72.7	132.6	127.3	1.276	0	22	4	895	6
FALSE	High	IsMasterProtein	B4DPP6	cDNA FLJ54371, highly similar to Serum albumin OS=Homo sapiens PE=2 SV=1	0	14.722	5.66343	3	16	3	1	618	70.3	6.09	High	High	Not Found	Not Found		0.01	200		200	200			0.239	0	13.8	3	189	3
FALSE	High	IsMasterProtein	B4DRM3	cDNA FLJ54492, highly similar to Eukaryotic translation initiation factor 4B OS=Homo sapiens PE=2 SV=1	0	101.788	17.8571	7	66	7	1	616	69.7	5.67	High	High	High	High		1.116	94.5136	105.486	93.4	95.6	106.6	104.4	2.06	0	80.76	7	988	7
FALSE	Medium	IsMasterProtein	B4E1V4	cDNA FLJ54529 OS=Homo sapiens PE=2 SV=1	0.022	1.185	1.98413	1	1	1	1	504	56.5	6.32	Peak Found	Not Found	High	Not Found		0.983	100.88	99.1198	100.9		99.1		0.093	0	0	1
FALSE	High	IsMasterProtein	B4DKQ5	cDNA FLJ54710, highly similar to Target of Myb protein 1 OS=Homo sapiens PE=2 SV=1	0	19.251	3.39321	1	8	1	1	501	54.8	4.81	High	High	High	High		1.418	82.7073	117.293	84.2	81.2	115.8	118.8	0.233	0	11.86	1	306	1
FALSE	High	IsMasterProtein	B4E2L0	cDNA FLJ54730, highly similar to cAMP-dependent protein kinase, beta-2-catalytic subunit (EC 2.7.11.11) OS=Homo sapiens PE=2 SV=1	0	41.925	16.0804	6	37	2	1	398	46.2	8.69	Not Found	Peak Found	Not Found	High		4.13	38.9874	161.013		39		161	1.721	0	33.39	6	509	5
FALSE	High	IsMasterProtein	B4E1U9	cDNA FLJ54776, highly similar to Cell division control protein 42 homolog OS=Homo sapiens PE=2 SV=1	0	72.682	12.7119	3	68	3	1	236	26.5	7.59	High	High	High	High		1.391	83.6364	116.364	83.8	83.5	116.2	116.5	7.111	0	99.87	3	1552	3
FALSE	High	IsMasterProtein	B4DQJ7	cDNA FLJ54836 OS=Homo sapiens PE=2 SV=1	0	4.957	3.63636	1	2	1	1	330	36.8	8.44	Peak Found	Not Found	High	Not Found		1.504	79.8681	120.132	79.9		120.1		0.089	0	2.21	1	48	1
FALSE	High	IsMasterProtein	B7Z5W1	cDNA FLJ54854, highly similar to Junctional adhesion molecule A OS=Homo sapiens PE=2 SV=1	0	11.843	6.60066	1	4	1	1	303	32.8	8.85	Peak Found	Peak Found	High	High		2.426	58.3762	141.624	60.9	55.9	139.1	144.1	0.122	0	6.81	1	222	1
FALSE	High	IsMasterProtein	B4DRP7	cDNA FLJ55154 OS=Homo sapiens PE=2 SV=1	0	8.547	7.18391	1	1	1	1	348	39.7	6.09	Not Found	Not Found	Not Found	Not Found	Acetyl [N-Term]								0.166	0			84	1
FALSE	High	IsMasterProtein	B4DX69	cDNA FLJ55158, highly similar to Thioredoxin, mitochondrial OS=Homo sapiens PE=2 SV=1	0	24.81	8.12183	2	14	2	1	197	21.8	8.57	High	High	High	High		1.08	96.1632	103.837	93.4	99	106.6	101	1.31	0	19.68	2	257	2
FALSE	High	IsMasterProtein	B7Z287	cDNA FLJ55197, highly similar to Protein FAM60A OS=Homo sapiens PE=2 SV=1	0	10.512	9.54198	2	6	2	1	262	29.1	9	Not Found	Not Found	High	High		100		200			200	200	0.311	0	6.78	2	93	2
FALSE	High	IsMasterProtein	B4DWN9	cDNA FLJ55258, highly similar to Homo sapiens pleckstrin homology domain containing, family F member 1, mRNA OS=Homo sapiens PE=2 SV=1	0	15.375	13.7363	3	8	3	1	364	40.7	8.63	Peak Found	Peak Found	High	High		2.418	58.5115	141.488	57.3	59.7	142.7	140.3	0.369	0	12	3	66	3
FALSE	High	IsMasterProtein	B7Z2P6	cDNA FLJ55296, highly similar to Homo sapiens WD repeat domain 42A (WDR42A), mRNA OS=Homo sapiens PE=2 SV=1	0	23.63	5.05992	2	8	1	1	751	84.7	5.12	Peak Found	Not Found	High	Not Found		9.299	19.4188	180.581	19.4		180.6		0.174	0	11.58	2	201	2
FALSE	High	IsMasterProtein	B4DRE5	cDNA FLJ55391 OS=Homo sapiens PE=2 SV=1	0	6.078	3.69231	1	2	1	1	325	35.3	6.84	Peak Found	Not Found	High	Not Found		2.107	64.3752	135.625	64.4		135.6		0.166	0	3.49	1	57	1
FALSE	High	IsMasterProtein	B7Z8E7	cDNA FLJ55400, highly similar to Protein OS-9 OS=Homo sapiens PE=2 SV=1	0	8.079	5.67568	2	4	2	1	740	83.5	4.91	Not Found	Peak Found	Not Found	High		2.349	59.7135	140.286		59.7		140.3	0.119	0	0	1	49	2
FALSE	High	IsMasterProtein	ch15u_B4DJL6	cDNA FLJ55475 OS=Homo sapiens GN=VWA9 PE=1 SV=1	0	16.085	8.30325	2	6	2	1	554	61.3	5.15	Not Found	Peak Found	High	High		2.439	68.0477	165.976		68	200	132	0.179	0	8.19	2	140	2
FALSE	High	IsMasterProtein	B4E2A6	cDNA FLJ55508, highly similar to Sad1/unc-84-like protein 2 OS=Homo sapiens PE=2 SV=1	0	42.86	11.4362	5	18	5	1	752	83.9	6.84	Not Found	Peak Found	High	High		100		200			200	200	0.334	0	27.93	5	465	5
FALSE	High	IsMasterProtein	B4DNK0	cDNA FLJ55582, highly similar to Homo sapiens DPH1 homolog (DPH1), mRNA OS=Homo sapiens PE=2 SV=1	0	39.77	9.71302	3	26	3	1	453	50.2	8.31	High	High	High	High		2.913	51.1068	148.893	56.4	45.8	143.6	154.2	1.096	0	17.35	3	158	3
FALSE	High	IsMasterProtein	B4DSU5	cDNA FLJ55583, highly similar to Polypyrimidine tract-binding protein 2 OS=Homo sapiens PE=2 SV=1	0	33.643	15.9259	4	14	4	1	540	58.6	8.92	High	Peak Found	High	High		2.049	65.6036	134.396	73.6	57.6	126.4	142.4	0.557	0	15.38	4	284	4
FALSE	High	IsMasterProtein	B7Z4Q0	cDNA FLJ55728, highly similar to ADP-ribosylation factor GTPase-activating protein 3 OS=Homo sapiens PE=2 SV=1	0	42.292	13.7387	4	13	4	1	444	48.9	7.59	High	Peak Found	High	High	Acetyl [N-Term]	4.507	36.3156	163.684	35.5	37.1	164.5	162.9	0.468	0	18.54	3	610	4
FALSE	High	IsMasterProtein	B4DND3	cDNA FLJ55760, highly similar to Squalene synthetase (EC 2.5.1.21) OS=Homo sapiens PE=2 SV=1	0	21.767	8.43882	3	14	3	1	474	53.4	7.27	Not Found	Peak Found	High	High		19.59	9.95511	195.022		10	200	190	0.28	0	15.55	3	518	3
FALSE	High	IsMasterProtein	B4E1T5	cDNA FLJ55764, highly similar to Apolipoprotein-L2 OS=Homo sapiens PE=2 SV=1	0	42.579	13.363	3	17	3	1	449	48.9	6	High	Peak Found	High	High		3.658	42.9366	157.063	23.1	62.8	176.9	137.2	1.015	0	23.92	3	282	2
FALSE	High	IsMasterProtein	B4DN31	cDNA FLJ55809 OS=Homo sapiens PE=2 SV=1	0	7.541	4.84581	2	6	2	1	454	51	8.87	Peak Found	Peak Found	High	High		4.33	37.5232	162.477	31.6	43.5	168.4	156.5	0.194	0	4.8	2	79	2
FALSE	High	IsMasterProtein	B4DJ79	cDNA FLJ55847 OS=Homo sapiens PE=2 SV=1	0	9.064	12.8571	1	4	1	1	210	22.6	4.94	Peak Found	Peak Found	High	High		1.605	76.7655	123.235	71.4	82.1	128.6	117.9	0.389	0	6.22	1	128	1
FALSE	High	IsMasterProtein	B4DH52	cDNA FLJ55916, highly similar to General transcription factor II-I OS=Homo sapiens PE=2 SV=1	0	282.267	25.5791	20	201	20	1	993	111.8	6.39	High	High	High	High		2.597	55.6066	144.393	54.6	56.7	145.4	143.3	4.319	0	265.74	19	3449	20
FALSE	High	IsMasterProtein	B4E1C1	cDNA FLJ55943, highly similar to Death domain-associated protein 6 OS=Homo sapiens PE=2 SV=1	0	22.428	4.25532	2	8	2	1	752	82.8	4.89	High	Peak Found	High	High		2.595	55.6299	144.37	75.4	35.9	124.6	164.1	0.259	0	10.75	2	316	2
FALSE	Medium	IsMasterProtein	B4DI41	cDNA FLJ55972, highly similar to Methyl-CpG-binding domain protein 1 OS=Homo sapiens PE=2 SV=1	0.013	1.817	3.04878	1	2	1	1	656	72.4	9.38	Not Found	Not Found	High	Not Found									0.072	0	1.68	1	20	1
FALSE	High	IsMasterProtein	B4DLH1	cDNA FLJ55982, highly similar to Homo sapiens ADP-ribosylation factor-like 2-like 1 (ARL2L1), transcript variant 1, mRNA OS=Homo sapiens PE=2 SV=1	0	5.058	4.20561	1	2	1	1	428	48.6	6.49	Not Found	Not Found	High	Not Found		100		200			200		0.105	0	2.46	1	61	1
FALSE	High	IsMasterProtein	B4DMB7	cDNA FLJ55986 OS=Homo sapiens PE=2 SV=1	0	53.814	13.8728	4	24	4	1	519	59.7	8.29	High	High	High	High		1.996	66.7475	133.253	61.7	71.8	138.3	128.2	0.607	0	26.3	4	567	4
FALSE	High	IsMasterProtein	B4DYU2	cDNA FLJ55996, highly similar to Conserved oligomeric Golgi complex component 8 OS=Homo sapiens PE=2 SV=1	0	20.441	3.28638	1	4	1	1	639	71.2	5.26	Peak Found	Not Found	High	Not Found		1.258	88.5645	111.435	88.6		111.4		0.129	0	4.44	1	129	1
FALSE	High	IsMasterProtein	B4E0Y5	cDNA FLJ56013, highly similar to NUAK family SNF1-like kinase 2 (EC 2.7.11.1) OS=Homo sapiens PE=2 SV=1	0.004	2.805	2.08333	1	2	1	1	672	73.9	8.95	Not Found	Not Found	High	Not Found		100		200			200		0.075	0	2.27	1	17	1
FALSE	High	IsMasterProtein	B4DVA0	cDNA FLJ56039, highly similar to 5-aminolevulinate synthase, nonspecific, mitochondrial (EC 2.3.1.37) OS=Homo sapiens PE=2 SV=1	0	39.72	9.13242	4	16	4	1	657	72.6	8.21	High	High	High	High		9.973	18.2263	181.774	17.8	18.7	182.2	181.3	0.299	0	24.99	4	376	4
FALSE	High	IsMasterProtein	B4DJ38	cDNA FLJ56092, highly similar to Pentatricopeptide repeat protein 1 OS=Homo sapiens PE=2 SV=1	0	44.43	11.0814	6	30	4	1	749	84.1	8.57	High	High	Peak Found	High		1.055	97.3218	102.678	96.5	98.1	103.5	101.9	0.52	2	32.82	6	499	6
FALSE	High	IsMasterProtein	B4DLM8	cDNA FLJ56105, highly similar to Nuclear valosin-containing protein-like OS=Homo sapiens PE=2 SV=1	0	36.607	9.57944	5	15	5	1	856	95	6.58	High	High	High	High		2.295	60.6959	139.304	61.2	60.2	138.8	139.8	0.311	0	17.89	5	360	4
FALSE	High	IsMasterProtein	B4DU42	cDNA FLJ56153, highly similar to Homo sapiens transforming growth factor beta regulator 4 (TBRG4), transcript variant 1, mRNA OS=Homo sapiens PE=2 SV=1	0	61.522	13.3956	6	34	6	1	642	71.8	7.3	High	High	High	High		1.603	76.8297	123.17	77.7	75.9	122.3	124.1	0.805	0	42.51	6	571	5
FALSE	High	IsMasterProtein	B4DV84	cDNA FLJ56159, highly similar to 26S proteasome non-ATPase regulatory subunit 3 OS=Homo sapiens PE=2 SV=1	0	184.485	36.2235	14	133	14	1	519	59.3	7.42	High	High	High	High	Acetyl [N-Term]	1.2	90.8901	109.11	90.4	91.4	109.6	108.6	5.952	0	165.31	14	2314	14
FALSE	High	IsMasterProtein	B7Z8T0	cDNA FLJ56198, highly similar to Serine/threonine-protein kinase PCTAIRE-1 (EC 2.7.11.22) OS=Homo sapiens PE=2 SV=1	0	13.815	7.15474	3	9	3	1	601	66.7	9.29	High	Peak Found	High	High		2.572	55.9969	144.003	34.4	77.6	165.6	122.4	0.122	0	8.3	3	183	3
FALSE	High	IsMasterProtein	B4E365	cDNA FLJ56210, highly similar to Zinc phosphodiesterase ELAC protein 2 (EC 3.1.26.11) OS=Homo sapiens PE=2 SV=1	0	196.12	46.1538	15	94	1	1	624	70	7.01	Peak Found	Peak Found	High	High		3.142	48.2877	151.712	45.1	51.4	154.9	148.6	3.739	0	129.7	15	1986	15
FALSE	High	IsMasterProtein	B4DPX9	cDNA FLJ56221, highly similar to YTH domain protein 3 OS=Homo sapiens PE=2 SV=1	0	69.509	17.1769	6	50	5	1	588	64.5	8.24	High	High	High	High		2.835	52.1541	147.846	53.8	50.5	146.2	149.5	1.721	0	47.27	6	678	6
FALSE	High	IsMasterProtein	B4DX61	cDNA FLJ56262, highly similar to M-phase inducer phosphatase 3 (EC 3.1.3.48) OS=Homo sapiens PE=2 SV=1	0	10.526	6.32653	2	6	2	1	490	55.2	6.65	Not Found	Not Found	Not Found	High		100		200				200	0.186	0	8.11	2	90	2
FALSE	High	IsMasterProtein	B7Z7J1	cDNA FLJ56265, highly similar to Serine/threonine-protein kinase 32C (EC 2.7.11.1) OS=Homo sapiens PE=2 SV=1	0	11.749	2.40481	1	8	1	1	499	56.1	6.83	High	High	High	High		1.474	80.8331	119.167	83.2	78.5	116.8	121.5	0.186	0	7.51	1	183	1
FALSE	High	IsMasterProtein	B4E1J8	cDNA FLJ56285, highly similar to ADP-ribosylation factor-like protein 8B OS=Homo sapiens PE=2 SV=1	0	16.284	11.7647	3	22	3	1	238	27.2	9.66	High	High	High	High		1.747	72.8006	127.199	72.6	73	127.4	127	1.894	0	18.05	3	196	3
FALSE	High	IsMasterProtein	B4DEE8	cDNA FLJ56323, highly similar to Methylated-DNA--protein-cysteinemethyltransferase (EC 2.1.1.63) OS=Homo sapiens PE=2 SV=1	0.001	3.998	5.88235	1	4	1	1	238	25	8.66	Not Found	Not Found	High	High		100		200			200	200	0.212	0	0	1	24	1
FALSE	Medium	IsMasterProtein	B4DH68	cDNA FLJ56325, highly similar to Homo sapiens DIX domain containing 1 (DIXDC1), mRNA OS=Homo sapiens PE=2 SV=1	0.039	0.767	5.45977	1	2	1	1	348	40	6.84	Not Found	Not Found	Not Found	Not Found	Acetyl [N-Term]								0.101	0			0	1
FALSE	High	IsMasterProtein	B4DH58	cDNA FLJ56344, highly similar to Implantation-associated protein OS=Homo sapiens PE=2 SV=1	0	15.379	3.81471	1	8	1	1	367	41.4	9.99	High	High	High	High		1.217	90.2271	109.773	86.4	94.1	113.6	105.9	0.259	0	11.62	1	243	1
FALSE	High	IsMasterProtein	B4DI54	cDNA FLJ56386, highly similar to Heat shock 70 kDa protein 1L OS=Homo sapiens PE=2 SV=1	0	245.008	28.7943	15	187	3	1	705	77.5	8.06	High	High	High	High		1.366	84.546	115.454	84.3	84.8	115.7	115.2	5.31	0	250.81	15	4403	15
FALSE	High	IsMasterProtein	B7Z7F0	cDNA FLJ56420, highly similar to Aspartyl aminopeptidase (EC 3.4.11.21) OS=Homo sapiens PE=2 SV=1	0	49.786	20.8925	7	34	7	1	493	54.5	7.72	High	High	High	High		1.335	85.6528	114.347	86.4	84.9	113.6	115.1	1.555	0	39.87	7	594	6
FALSE	High	IsMasterProtein	B4DEA8	cDNA FLJ56425, highly similar to Very-long-chain specific acyl-CoAdehydrogenase, mitochondrial (EC 1.3.99.-) OS=Homo sapiens PE=2 SV=1	0	239.238	34.5221	18	145	18	1	701	75.2	8.88	High	High	High	High		1.146	93.1927	106.807	93.5	92.9	106.5	107.1	4.766	0	194.52	18	3749	18
FALSE	High	IsMasterProtein	B4DG73	cDNA FLJ56431, highly similar to Conserved oligomeric Golgi complex component 6 OS=Homo sapiens PE=2 SV=1	0	15.065	6.08696	3	10	3	1	690	76.8	6.24	Peak Found	Peak Found	High	High		1.808	71.2365	128.763	71.5	71	128.5	129	0.199	0	10.86	3	77	3
FALSE	High	IsMasterProtein	B4DIS6	cDNA FLJ56443, highly similar to Putative ATP-dependent RNA helicase DHX33 (EC 3.6.1.-) OS=Homo sapiens PE=2 SV=1	0	15.456	5.22193	3	8	3	1	766	85.2	8.97	Peak Found	Peak Found	High	High		6.085	28.2281	171.772	43.1	13.4	156.9	186.6	0.158	0	7.96	3	97	3
FALSE	High	IsMasterProtein	B4DZH6	cDNA FLJ56474, highly similar to Histone deacetylase 6 OS=Homo sapiens PE=2 SV=1	0.002	3.154	0.732303	1	4	1	1	1229	132.7	5.36	High	High	Peak Found	Peak Found		1.842	70.384	129.616	74.5	66.3	125.5	133.7	0.059	0	4.5	1	55	1
FALSE	High	IsMasterProtein	B4DZG2	cDNA FLJ56521, highly similar to Homo sapiens transcription termination factor, RNA polymerase I (TTF1), mRNA OS=Homo sapiens PE=2 SV=1	0	20.479	4.97238	3	10	3	1	905	102.9	9.38	Peak Found	Not Found	High	High		3.958	40.3423	159.658	40.3		159.7		0.142	0	12.09	3	260	3
FALSE	High	IsMasterProtein	B4DSS4	cDNA FLJ56631 OS=Homo sapiens PE=2 SV=1	0	14.08	4.18006	3	10	3	1	933	106	5.94	Not Found	Not Found	High	High		100		200			200	200	0.126	0	13.1	3	194	3
FALSE	High	IsMasterProtein	B7Z3A4	cDNA FLJ56906, highly similar to RNA-binding protein 16 OS=Homo sapiens PE=2 SV=1	0	21.397	4.52187	4	14	3	1	1349	148.8	9.06	Peak Found	Peak Found	High	High		1.902	68.9141	131.086	72.2	65.6	127.8	134.4	0.169	1	16.58	4	185	4
FALSE	High	IsMasterProtein	B4E3P1	cDNA FLJ57036, highly similar to Homo sapiens tropomyosin 2 (beta) (TPM2), transcript variant 2, mRNA OS=Homo sapiens PE=2 SV=1	0	100.537	20.132	8	116	2	1	303	34.1	5.05	High	High	High	High		1.699	74.0924	125.908	74	74.2	126	125.8	5.7	0	151.57	8	1943	8
FALSE	High	IsMasterProtein	B4DP06	cDNA FLJ57133, highly similar to Bifunctional purine biosynthesis protein PURH OS=Homo sapiens PE=2 SV=1	0	448.023	60.2251	23	295	1	1	533	58.6	6.84	High	High	High	High		1.158	92.6946	107.305	92.9	92.5	107.1	107.5	51.33	0	349.54	23	5878	22
FALSE	High	IsMasterProtein	B4DDK4	cDNA FLJ57254, highly similar to Protein deltex-2 OS=Homo sapiens PE=2 SV=1	0	26.718	13.0125	5	14	1	1	561	60.8	8.62	Not Found	Not Found	High	Not Found		8.514	21.0217	178.978	20.6	21.5	179.4	178.5	0.468	4	15.49	5	206	5
FALSE	High	IsMasterProtein	B4DMS5	cDNA FLJ57399, highly similar to HIV-1 Rev-binding protein 2 OS=Homo sapiens PE=2 SV=1	0	45.499	32.2034	3	26	1	1	177	20.2	8.79	High	High	High	High		1.677	74.7202	125.28	75.3	74.1	124.7	125.9	4.995	0	31.73	3	540	3
FALSE	High	IsMasterProtein	B4DLZ4	cDNA FLJ57528, highly similar to Dihydropyrimidinase-related protein 3 OS=Homo sapiens PE=2 SV=1	0	87.714	39.2857	6	39	2	1	196	21.1	9.58	Not Found	Not Found	Not Found	Not Found	Acetyl [N-Term]								6.197	0	51.61	5	1068	6
FALSE	High	IsMasterProtein	B4DLD6	cDNA FLJ57742 OS=Homo sapiens PE=2 SV=1	0	40.008	19.6078	3	33	3	1	153	17	8.75	High	High	High	High		1.534	78.9214	121.079	78.5	79.4	121.5	120.6	6.743	0	48.38	3	587	2
FALSE	High	IsMasterProtein	B4DZ33	cDNA FLJ57817, highly similar to Homeodomain-interacting protein kinase 1 (EC 2.7.11.1) OS=Homo sapiens PE=2 SV=1	0	5.779	0.936768	1	2	1	1	1281	138.9	8.22	Not Found	Peak Found	Not Found	High		1.597	77.0127	122.987		77		123	0.045	0	2.56	1	28	1
FALSE	High	IsMasterProtein	B4DDM6	cDNA FLJ57899, highly similar to Mitotic checkpoint protein BUB3 OS=Homo sapiens PE=2 SV=1	0	52.491	25.4032	7	25	1	1	248	28.2	7.11	Not Found	Not Found	Not Found	Not Found									3.125	0	28.19	6	476	7
FALSE	High	IsMasterProtein	B4DF33	cDNA FLJ57960 OS=Homo sapiens PE=2 SV=1	0.001	4.205	3.01003	1	2	1	1	299	32.2	10.9	Not Found	Not Found	Not Found	Not Found	Acetyl [N-Term]								0.11	0			58	1
FALSE	High	IsMasterProtein	B7Z2Q0	cDNA FLJ57978 OS=Homo sapiens PE=2 SV=1	0	103.931	15.9404	7	40	7	1	872	97.1	5.39	High	High	High	High		2.456	57.8705	142.129	56	59.7	144	140.3	0.758	0	58.95	7	967	7
FALSE	High	IsMasterProtein	B7Z4Y1	cDNA FLJ58031, highly similar to Tuftelin OS=Homo sapiens PE=2 SV=1	0.001	4.245	2.44499	1	2	1	1	409	46.4	6.13	Not Found	Not Found	High	Not Found		100		200			200		0.083	0	2.3	1	43	1
FALSE	High	IsMasterProtein	B4DQP1	cDNA FLJ58045, highly similar to NADH dehydrogenase (ubiquinone) 1 alpha subcomplex subunit 13 (EC 1.6.5.3) OS=Homo sapiens PE=2 SV=1	0	20.87	8.42491	2	14	2	1	273	30.1	6.9	High	High	High	High		1.392	83.6024	116.398	85.1	82.1	114.9	117.9	0.778	0	18.03	2	148	2
FALSE	High	IsMasterProtein	B4DR29	cDNA FLJ58147, highly similar to Coiled-coil domain-containing protein 46 OS=Homo sapiens PE=2 SV=1	0	14.5	3.56021	2	8	2	1	955	112.6	6.62	Peak Found	Peak Found	High	High		3.309	46.4168	153.583	51.7	41.1	148.3	158.9	0.073	0	9.5	2	282	2
FALSE	High	IsMasterProtein	B4DNH2	cDNA FLJ58596, highly similar to Eukaryotic initiation factor 4A-I (EC 3.6.1.-) OS=Homo sapiens PE=2 SV=1	0	272.812	68.1223	17	268	1	1	229	26.8	5.43	Not Found	Not Found	Not Found	Not Found									4922.88	0	332.73	16	4723	17
FALSE	High	IsMasterProtein	B4E074	cDNA FLJ58655, highly similar to Notchless homolog 1 OS=Homo sapiens PE=2 SV=1	0	70.991	16.0521	5	26	1	1	461	50.7	6.98	High	High	Peak Found	Peak Found	Acetyl [N-Term]	1.345	85.2865	114.714	85.7	84.9	114.3	115.1	1.154	0	32.46	4	799	5
FALSE	High	IsMasterProtein	B7Z4N5	cDNA FLJ58676, highly similar to Protein AF-9 OS=Homo sapiens PE=2 SV=1	0	6.651	1.81219	1	4	1	1	607	67.8	9.06	Peak Found	Not Found	High	High		9.706	19.5965	190.202	19.6		180.4	200	0.086	0	2.51	1	105	1
FALSE	Medium	IsMasterProtein	B7Z8D1	cDNA FLJ59079 OS=Homo sapiens PE=2 SV=1	0.04	0.749	25.5319	1	5	1	1	141	15.8	7.91	High	Not Found	Not Found	Not Found									0.389	0	0	1
FALSE	High	IsMasterProtein	B4DFR2	cDNA FLJ59194, moderately similar to Dynein light chain 2A, cytoplasmic OS=Homo sapiens PE=2 SV=1	0	31.908	30.5785	4	22	4	1	121	13.4	10.08	High	High	High	High	Acetyl [N-Term]	1.701	74.058	125.942	74.6	73.6	125.4	126.4	9	0	18.01	2	467	4
FALSE	High	IsMasterProtein	B4DJQ5	cDNA FLJ59211, highly similar to Glucosidase 2 subunit beta OS=Homo sapiens PE=2 SV=1	0	163.185	31.7757	10	104	10	1	535	60.1	4.42	High	High	High	High		1.187	91.4558	108.544	91.6	91.3	108.4	108.7	10.007	0	105.03	10	1827	10
FALSE	High	IsMasterProtein	B4DLN7	cDNA FLJ59248, highly similar to Homo sapiens cytochrome P450, family 20, subfamily A, polypeptide 1, transcript variant 1, mRNA OS=Homo sapiens PE=2 SV=1	0	12.474	6.80851	2	6	2	1	470	53.4	6.21	Peak Found	Peak Found	High	High		2.366	59.419	140.581	58.5	60.3	141.5	139.7	0.179	0	7.21	2	225	2
FALSE	High	IsMasterProtein	B4DZF2	cDNA FLJ59571, highly similar to Eukaryotic translation initiation factor 4gamma 2 OS=Homo sapiens PE=2 SV=1	0	192.062	19.1837	15	126	15	1	980	110.2	7.94	High	High	High	High		1.986	66.9747	133.025	66.1	67.8	133.9	132.2	2.346	0	163.98	15	2621	15
FALSE	High	IsMasterProtein	B4DPG9	cDNA FLJ59630, highly similar to Growth hormone-inducible transmembrane protein OS=Homo sapiens PE=2 SV=1	0.001	3.704	3.16092	1	2	1	1	348	37.5	9.89	Not Found	Not Found	High	Not Found		100		200			200		0.136	0	0	1	48	1
FALSE	High	IsMasterProtein	B4DMM7	cDNA FLJ59722, highly similar to Retinoblastoma-binding protein 5 OS=Homo sapiens PE=2 SV=1	0	49.754	8.726	3	14	3	1	573	63.3	5.2	High	High	High	High		2.018	66.2664	133.734	68.2	64.4	131.8	135.6	0.417	0	19.96	3	568	3
FALSE	High	IsMasterProtein	B4E368	cDNA FLJ60058, highly similar to Myosin light chain 1, slow-twitch muscle A isoform OS=Homo sapiens PE=2 SV=1	0	33.245	16.5919	3	30	1	1	223	24.5	9.7	Peak Found	Peak Found	High	High		2.334	59.9916	140.008	58.3	61.7	141.7	138.3	1.581	0	33.19	3	519	3
FALSE	High	IsMasterProtein	B4DI08	cDNA FLJ60091, highly similar to Hypoxia-inducible factor 1 alpha inhibitor(EC 1.14.11.16) OS=Homo sapiens PE=2 SV=1	0	17.681	10.4439	2	6	2	1	383	44.2	6.2	Not Found	Not Found	High	High		100		200			200	200	0.274	0	8.95	2	193	2
FALSE	High	IsMasterProtein	B4DTA2	cDNA FLJ60148, highly similar to Homo sapiens heterogeneous nuclear ribonucleoprotein D-like (HNRPDL), transcript variant 2, mRNA OS=Homo sapiens PE=2 SV=1	0	103.439	23.6162	9	107	8	1	271	30.2	8.72	High	High	High	High	Acetyl [N-Term]	1.163	92.4589	107.541	93.1	91.8	106.9	108.2	33.551	2	120.61	8	1357	9
FALSE	High	IsMasterProtein	B4DGC5	cDNA FLJ60491, highly similar to IQ motif and Sec7 domain-containing protein 1 OS=Homo sapiens PE=2 SV=1	0	15.147	1.8851	1	4	1	1	1114	124.3	8.35	High	Not Found	High	Not Found		2.364	59.4606	140.539	59.5		140.5		0.078	0	4.2	1	115	1
FALSE	High	IsMasterProtein	B4DJV9	cDNA FLJ60607, highly similar to Acyl-protein thioesterase 1 (EC 3.1.2.-) OS=Homo sapiens PE=2 SV=1	0	25.729	19.0114	3	24	3	1	263	28.3	7.64	High	High	High	High		1.31	86.5747	113.425	86.4	86.7	113.6	113.3	1.276	0	19.84	3	264	3
FALSE	High	IsMasterProtein	B4DRL5	cDNA FLJ60834, highly similar to Engulfment and cell motility protein 2 (CED-12 homolog A) OS=Homo sapiens PE=2 SV=1	0	71.181	14.8907	8	38	6	1	732	83.9	5.88	High	High	High	High		1.295	87.1402	112.86	85.3	89	114.7	111	0.734	2	46.33	8	550	8
FALSE	High	IsMasterProtein	B4DVR4	cDNA FLJ60912, highly similar to Vinexin OS=Homo sapiens PE=2 SV=1	0	10.424	6.23377	2	6	2	1	385	42.3	8.98	Peak Found	Peak Found	High	High		2.656	54.71	145.29	53.1	56.3	146.9	143.7	0.194	0	2.08	2	88	2
FALSE	High	IsMasterProtein	B7Z7G4	cDNA FLJ60939, highly similar to NAD-dependent deacetylase sirtuin-3, mitochondrial (EC 3.5.1.-) OS=Homo sapiens PE=2 SV=1	0	5.215	2.63789	1	2	1	1	417	45.6	8.25	Not Found	Peak Found	Not Found	High		1.275	87.925	112.075		87.9		112.1	0.101	0	2.15	1	49	1
FALSE	High	IsMasterProtein	B4E218	cDNA FLJ61052, highly similar to Homo sapiens myosin head domain containing 1 (MYOHD1), transcript variant 2, mRNA OS=Homo sapiens PE=2 SV=1	0	10.811	2.06186	1	4	1	1	970	109.1	7.71	Peak Found	Peak Found	High	High		2.438	58.1709	141.829	61.2	55.1	138.8	144.9	0.047	0	6.17	1	186	1
FALSE	High	IsMasterProtein	B4DEF8	cDNA FLJ61100, highly similar to 39S ribosomal protein L45, mitochondrial OS=Homo sapiens PE=2 SV=1	0	37.463	20.0608	5	31	5	1	329	37.8	9.13	High	High	High	High		1.338	85.5577	114.442	84.8	86.3	115.2	113.7	1.31	0	29.93	5	327	5
FALSE	High	IsMasterProtein	B4DGE7	cDNA FLJ61235, weakly similar to WD repeat protein YBL104C OS=Homo sapiens PE=2 SV=1	0	28.367	5.82857	4	19	4	1	875	98.6	6.8	High	High	High	High		1.672	74.8392	125.161	76.2	73.4	123.8	126.6	0.274	0	21.96	4	330	4
FALSE	High	IsMasterProtein	B4DJ30	cDNA FLJ61290, highly similar to Neutral alpha-glucosidase AB OS=Homo sapiens PE=2 SV=1	0	316.691	24.8241	22	271	2	1	995	112.9	6.06	High	High	High	High		1.289	87.3664	112.634	88.1	86.7	111.9	113.3	11.282	25	278.35	22	3746	22
FALSE	Medium	IsMasterProtein	B4DJY5	cDNA FLJ61298, highly similar to Vesicle-associated membrane protein 1 OS=Homo sapiens PE=2 SV=1	0.014	1.748	6.45161	1	2	1	1	248	27.1	7.71	Not Found	Not Found	Not Found	High		100		200				200	0.233	0	0	1	0	1
FALSE	High	IsMasterProtein	B4DT57	cDNA FLJ61383, highly similar to Serine/threonine-protein kinase 24 (EC 2.7.11.1) OS=Homo sapiens PE=2 SV=1	0	86.773	24.2222	9	48	6	1	450	50	5.6	High	High	High	High		1.947	67.8676	132.132	66.1	69.6	133.9	130.4	2.981	3	62.95	9	1017	9
FALSE	High	IsMasterProtein	B4DTK7	cDNA FLJ61387, highly similar to Homo sapiens conserved nuclear protein NHN1 (NHN1), mRNA OS=Homo sapiens PE=2 SV=1	0	70.015	13.306	8	57	8	1	977	108.9	8.44	High	High	High	High		1.956	67.6626	132.337	66.3	69	133.7	131	0.778	0	57.16	8	467	8
FALSE	High	IsMasterProtein	B4DYE2	cDNA FLJ61467, highly similar to Chromosome-associated kinesin KIF4A OS=Homo sapiens PE=2 SV=1	0	22.882	5.02431	5	17	1	1	1234	139.8	6.13	Not Found	High	Not Found	Not Found		0.01	200			200			0.173	0	14.89	5	274	5
FALSE	Medium	IsMasterProtein	B4E1Z6	cDNA FLJ61535 OS=Homo sapiens PE=2 SV=1	0.05	0.72	2.33463	1	2	1	1	771	87.2	8.87	Not Found	Not Found	Not Found	Not Found									0.047	0			0	1
FALSE	High	IsMasterProtein	B4E3G8	cDNA FLJ61576, highly similar to Mitochondrial fission regulator 1 OS=Homo sapiens PE=2 SV=1	0	5.433	3.44828	1	2	1	1	348	38.7	9.03	Not Found	Not Found	Not Found	Not Found									0.136	0	2.48	1	73	1
FALSE	Medium	IsMasterProtein	B7Z1P4	cDNA FLJ61628, highly similar to Homo sapiens Cdc42 GTPase-activating protein (CDGAP), mRNA OS=Homo sapiens PE=2 SV=1	0.012	1.85	1.54686	1	4	1	1	1099	120.5	5.85	Not Found	Not Found	High	Not Found		100		200			200		0.037	0	0	1	20	1
FALSE	High	IsMasterProtein	B7Z854	cDNA FLJ61649, highly similar to Homo sapiens estrogen receptor binding protein (ERBP), mRNA OS=Homo sapiens PE=2 SV=1	0	120.418	23.9601	8	48	1	1	601	66.1	5.11	Not Found	Not Found	Not Found	High		100		200				200	1.738	0	64.43	8	1151	8
FALSE	High	IsMasterProtein	B7Z5U5	cDNA FLJ61655, highly similar to Phosphorylated CTD-interacting factor 1 OS=Homo sapiens PE=2 SV=1	0	8.364	2.25352	1	6	1	1	710	81.3	7.43	Peak Found	Peak Found	High	High		3.007	49.9107	150.089	40.4	59.5	159.6	140.5	0.054	0	9.22	1	204	1
FALSE	High	IsMasterProtein	B4E1N4	cDNA FLJ61695, highly similar to Glioma tumor suppressor candidate region gene 2 protein OS=Homo sapiens PE=2 SV=1	0	70.9	15.1466	5	28	5	1	614	70	10.37	High	High	High	High		7.841	22.6213	177.379	22.8	22.5	177.2	177.5	1.031	0	44.67	5	678	5
FALSE	Medium	IsMasterProtein	B7Z8Y7	cDNA FLJ61700, highly similar to ATP-dependent DNA helicase Q5 (EC 3.6.1.-) OS=Homo sapiens PE=2 SV=1	0.01	2.009	1.08055	1	4	1	1	1018	111.4	8.78	Not Found	Not Found	Not Found	High		100		200				200	0.035	0	2.21	1	31	1
FALSE	High	IsMasterProtein	B7Z6F7	cDNA FLJ61705, highly similar to Symplekin OS=Homo sapiens PE=2 SV=1	0	97.649	11.0675	9	56	9	1	1274	141	6.13	High	High	High	High		2.108	64.3598	135.64	63.2	65.5	136.8	134.5	0.656	0	72.44	9	817	9
FALSE	High	IsMasterProtein	B7Z6L7	cDNA FLJ61737, moderately similar to Adrenodoxin-like protein OS=Homo sapiens PE=2 SV=1	0.001	3.847	10.7527	1	4	1	1	186	19.9	5.54	High	High	Peak Found	Peak Found		1.211	90.4635	109.537	101.4	79.5	98.6	120.5	0.233	0	4.44	1	44	1
FALSE	High	IsMasterProtein	A8K548	cDNA FLJ75008, highly similar to Homo sapiens proline-, glutamic acid-, leucine-rich protein 1 (PELP1), mRNA OS=Homo sapiens PE=2 SV=1	0	115.431	12.6549	8	54	8	1	1130	119.6	4.34	High	High	High	High	Acetyl [N-Term; N-Term]	1.087	95.8494	104.151	97.3	94.4	102.7	105.6	1.512	0	67.67	7	1163	8
FALSE	High	IsMasterProtein	A8K5C2	cDNA FLJ75055 OS=Homo sapiens PE=2 SV=1	0	38.83	21.2719	5	18	5	1	456	51	6.4	High	High	High	High		1.274	87.9341	112.066	96	79.9	104	120.1	0.859	0	15.96	5	386	5
FALSE	High	IsMasterProtein	A8K5U9	cDNA FLJ75056, highly similar to Homo sapiens phosphatidylinositol binding clathrin assembly protein (PICALM), mRNA OS=Homo sapiens PE=2 SV=1	0	119.934	14.5706	5	50	4	1	652	70.7	7.62	High	High	High	High		2.671	54.4871	145.513	54.7	54.2	145.3	145.8	1.683	2	74.58	5	1673	5
FALSE	High	IsMasterProtein	A8K964	cDNA FLJ75071, highly similar to Homo sapiens pinin, desmosome associated protein (PNN), mRNA OS=Homo sapiens PE=2 SV=1	0	53.9	6.9735	4	38	4	1	717	81.5	7.37	High	High	High	High		1.2	90.9159	109.084	91.1	90.7	108.9	109.3	0.52	0	45.81	4	794	4
FALSE	High	IsMasterProtein	A8K3A8	cDNA FLJ75085, highly similar to Homo sapiens glutaminyl-tRNA synthetase (QARS), mRNA OS=Homo sapiens PE=2 SV=1	0	246.515	27.871	16	149	16	1	775	87.8	7.15	High	High	High	High	Acetyl [N-Term]	1.117	94.4934	105.507	94.3	94.7	105.7	105.3	3.856	0	169.48	15	3383	15
FALSE	High	IsMasterProtein	A8K5M4	cDNA FLJ75088, highly similar to Homo sapiens p21 (CDKN1A)-activated kinase 2 (PAK2), mRNA OS=Homo sapiens PE=2 SV=1	0	141.998	24.0458	8	80	7	1	524	58	5.85	High	High	High	High	Acetyl [N-Term]	1.706	73.9155	126.084	69.3	78.5	130.7	121.5	4.505	3	75.23	7	1768	8
FALSE	High	IsMasterProtein	A8KAN5	cDNA FLJ75097, highly similar to Homo sapiens upstream binding protein 1 (LBP-1a) (UBP1), mRNA OS=Homo sapiens PE=2 SV=1	0	50.841	8.88889	4	22	3	1	540	60.5	6.44	High	High	High	High		1.772	72.1609	127.839	57.9	86.4	142.1	113.6	0.859	1	27.63	4	463	4
FALSE	High	IsMasterProtein	A8K6T5	cDNA FLJ75144, highly similar to Homo sapiens ash2 (absent, small, or homeotic)-like (ASH2L), mRNA OS=Homo sapiens PE=2 SV=1	0	59.046	11.7834	4	25	4	1	628	68.7	5.69	High	High	High	High		1.645	75.6088	124.391	80.1	71.2	119.9	128.8	0.468	0	39.68	4	789	4
FALSE	High	IsMasterProtein	A8K8G8	cDNA FLJ75219 OS=Homo sapiens PE=2 SV=1	0.001	4.769	3.10263	1	2	1	1	419	48.2	6.84	Not Found	Not Found	High	Not Found									0.077	0	1.92	1	41	1
FALSE	High	IsMasterProtein	A8KAP0	cDNA FLJ75279, highly similar to Homo sapiens elongation factor RNA polymerase II (ELL), mRNA OS=Homo sapiens PE=2 SV=1	0	8.791	3.7037	2	4	2	1	621	68.3	9.38	Not Found	Peak Found	High	High		3.168	54.5279	172.736		54.5	200	145.5	0.116	0	3.85	2	37	2
FALSE	High	IsMasterProtein	A8K4M4	cDNA FLJ75329, highly similar to Homo sapiens LAG1 longevity assurance homolog 2 (S. cerevisiae), transcript variant 2, mRNA OS=Homo sapiens PE=2 SV=1	0	7.194	4.73684	1	2	1	1	380	44.8	8.98	Not Found	Peak Found	Not Found	High		3.215	47.4527	152.547		47.5		152.5	0.145	0	3.88	1	44	1
FALSE	High	IsMasterProtein	A8K4P8	cDNA FLJ75337 OS=Homo sapiens PE=2 SV=1	0	29.025	4.06824	4	20	4	1	1524	170.4	7.31	High	High	High	High		1.778	71.9819	128.018	69.4	74.5	130.6	125.5	0.184	0	24.85	4	284	4
FALSE	High	IsMasterProtein	A8K5T7	cDNA FLJ75365, highly similar to Homo sapiens SUGT1B (SUGT1) mRNA OS=Homo sapiens PE=2 SV=1	0	144.781	36.4384	10	79	10	1	365	41	5.16	High	High	High	High		1.935	68.1539	131.846	67.4	68.9	132.6	131.1	6.499	0	106	10	1677	10
FALSE	High	IsMasterProtein	A8K2U2	cDNA FLJ75392, highly similar to Homo sapiens hexokinase II (HKII) mRNA OS=Homo sapiens PE=2 SV=1	0	8.302	2.39913	2	6	1	1	917	102.3	6.09	Not Found	Not Found	Not Found	Not Found									0.139	0	5.5	2	87	2
FALSE	High	IsMasterProtein	A8K5A5	cDNA FLJ75393, highly similar to Homo sapiens PHD finger protein 16 (PHF16), mRNA OS=Homo sapiens PE=2 SV=1	0	6.441	2.79465	1	4	1	1	823	93.8	7.05	Peak Found	Peak Found	High	High		10.036	18.1231	181.877	20.8	15.5	179.2	184.5	0.048	0	0	1	77	1
FALSE	High	IsMasterProtein	A8K245	cDNA FLJ75441, highly similar to Homo sapiens vaccinia related kinase 1 (VRK1), mRNA OS=Homo sapiens PE=2 SV=1	0	56.787	14.899	4	26	4	1	396	45.4	8.91	High	High	High	High		1.275	87.9203	112.08	85.2	90.7	114.8	109.3	1.291	0	36.9	4	462	4
FALSE	High	IsMasterProtein	A8KAH7	cDNA FLJ75444, highly similar to Homo sapiens protein kinase, cAMP-dependent, regulatory, type II, alpha (PRKAR2A), mRNA OS=Homo sapiens PE=2 SV=1	0	108.491	29.2079	9	53	9	1	404	45.5	5.07	High	High	High	High		1.239	89.3454	110.655	90.9	87.8	109.1	112.2	3.125	0	73.84	9	1171	9
FALSE	High	IsMasterProtein	A8K6F0	cDNA FLJ75449, highly similar to Homo sapiens aquarius homolog (mouse) (AQR), mRNA OS=Homo sapiens PE=2 SV=1	0	87.546	12.5253	13	52	12	1	1485	171.2	6.3	High	High	High	High		3.712	42.4433	157.557	42.8	42	157.2	158	0.621	0	62.23	13	589	13
FALSE	High	IsMasterProtein	A8K1U0	cDNA FLJ75601, highly similar to Homo sapiens neighbor of BRCA1 gene 1 (NBR1), transcript variant 1, mRNA OS=Homo sapiens PE=2 SV=1	0	7.832	1.65631	1	4	1	1	966	107.4	5.08	Not Found	Not Found	High	High		100		200			200	200	0.055	0	4.95	1	172	1
FALSE	High	IsMasterProtein	A8K333	cDNA FLJ75639, highly similar to Homo sapiens stromal membrane-associated protein 1, mRNA OS=Homo sapiens PE=2 SV=1	0	6.373	2.56959	1	4	1	1	467	50.4	8.75	Peak Found	Peak Found	High	High		2.119	64.1216	135.878	63.9	64.4	136.1	135.6	0.212	0	1.93	1	98	1
FALSE	High	IsMasterProtein	A8K3H9	cDNA FLJ75649, highly similar to Homo sapiens v-rel reticuloendotheliosis viral oncogene homolog B, nuclear factor of kappa light polypeptide gene enhancer in B-cells 3 (avian) (RELB), mRNA OS=Homo sapiens PE=2 SV=1	0	15.112	8.80829	3	10	3	1	579	62.1	6.34	Not Found	Not Found	High	High		100		200			200	200	0.233	0	12.03	3	96	3
FALSE	High	IsMasterProtein	A8K3S2	cDNA FLJ75663, highly similar to Homo sapiens zinc finger protein 403 (ZNF403), mRNA OS=Homo sapiens PE=2 SV=1	0	18.415	5.73888	2	8	2	1	697	79	6.49	Not Found	Not Found	High	Not Found		100		200			200		0.125	0	11.6	2	316	2
FALSE	High	IsMasterProtein	A8K5B0	cDNA FLJ75682, highly similar to Homo sapiens armadillo repeat containing, X-linked 3 (ARMCX3), transcript variant 1, mRNA OS=Homo sapiens PE=2 SV=1	0	16.821	7.12401	2	12	2	1	379	42.5	8.18	High	High	High	High		3.328	46.2054	153.795	50.6	41.9	149.4	158.1	0.413	0	11.25	2	208	2
FALSE	High	IsMasterProtein	A8K646	cDNA FLJ75699, highly similar to Homo sapiens osteoclast stimulating factor 1 (OSTF1), mRNA OS=Homo sapiens PE=2 SV=1	0	23.336	11.6822	1	8	1	1	214	23.7	5.68	High	High	High	High		1.351	85.0632	114.937	85.5	84.6	114.5	115.4	0.389	0	13.7	1	242	1
FALSE	High	IsMasterProtein	A8K6M4	cDNA FLJ75725, highly similar to Homo sapiens vesicle transport through interaction with t-SNAREs homolog 1B (yeast) (VTI1B), mRNA OS=Homo sapiens PE=2 SV=1	0.002	3.345	5.17241	1	4	1	1	232	26.7	8.79	Peak Found	Peak Found	High	High		2.025	66.1231	133.877	69.5	62.7	130.5	137.3	0.179	0	6.32	1	33	1
FALSE	High	IsMasterProtein	A8K7G2	cDNA FLJ75762, highly similar to Homo sapiens protease, serine, 25 (PRSS25), nuclear gene encodingmitochondrial protein, transcript variant 1, mRNA OS=Homo sapiens PE=2 SV=1	0	24.02	10.262	3	15	3	1	458	48.8	9.96	High	High	High	High		1.06	97.0994	102.901	102.9	91.3	97.1	108.7	0.557	0	8.02	3	168	3
FALSE	High	IsMasterProtein	A8K7T4	cDNA FLJ75774, highly similar to Homo sapiens lectin, mannose-binding 2 (LMAN2), mRNA OS=Homo sapiens PE=2 SV=1	0	27.723	21.3483	7	24	7	1	356	40.2	6.95	High	High	High	High		2.818	52.3843	147.616	53.6	51.2	146.4	148.8	1.404	0	21.07	7	172	7
FALSE	High	IsMasterProtein	A8K818	cDNA FLJ75784, highly similar to Homo sapiens CD3E antigen, epsilon polypeptide associated protein (CD3EAP), mRNA OS=Homo sapiens PE=2 SV=1	0	97.722	27.451	7	42	2	1	510	54.9	8.19	High	High	Peak Found	Peak Found		0.847	108.286	91.7136		108.3		91.7	2.548	0	45.39	7	749	7
FALSE	High	IsMasterProtein	A8K865	cDNA FLJ75789, highly similar to Homo sapiens synaptophysin-like 1 (SYPL1), transcript variant 1, mRNA OS=Homo sapiens PE=2 SV=1	0.004	2.793	4.2471	1	2	1	1	259	28.5	7.99	Not Found	Not Found	Not Found	High									0.233	0	2.19	1	20	1
FALSE	High	IsMasterProtein	A8KA19	cDNA FLJ75831, highly similar to Homo sapiens exportin, tRNA (nuclear export receptor for tRNAs) (XPOT), mRNA OS=Homo sapiens PE=2 SV=1	0	180.697	18.711	13	88	13	1	962	109.8	5.39	High	High	High	High	Acetyl [N-Term]	1.584	77.3877	122.612	80.4	74.4	119.6	125.6	2.574	0	112.84	13	1805	13
FALSE	High	IsMasterProtein	A8KAH1	cDNA FLJ75839, highly similar to Homo sapiens phosphatidylserine synthase 1 (PTDSS1), mRNA OS=Homo sapiens PE=2 SV=1	0.001	4.269	2.537	1	2	1	1	473	55.4	8.38	High	Not Found	Peak Found	Not Found									0.105	0	2.4	1	41	1
FALSE	High	IsMasterProtein	A8K6H9	cDNA FLJ75876, highly similar to Homo sapiens solute carrier family 38, member 2 (SLC38A2), mRNA OS=Homo sapiens PE=2 SV=1	0	8.874	4.1502	1	4	1	1	506	56	8	Not Found	Not Found	High	High		100		200			200	200	0.166	0	9.32	1	121	1
FALSE	High	IsMasterProtein	A8K6K2	cDNA FLJ75877, highly similar to Homo sapiens 5'-nucleotidase, cytosolic II (NT5C2), mRNA OS=Homo sapiens PE=2 SV=1	0	93.399	17.8253	6	51	6	1	561	64.9	6.14	High	High	High	High		1.604	76.8186	123.181	78	75.7	122	124.3	1.929	0	76.34	6	814	6
FALSE	High	IsMasterProtein	A8K6Q8	cDNA FLJ75881, highly similar to Homo sapiens transferrin receptor (p90, CD71) (TFRC), mRNA OS=Homo sapiens PE=2 SV=1	0	217.157	26.3158	17	136	17	1	760	84.8	6.61	High	High	High	High		2.117	64.1722	135.828	64.1	64.2	135.9	135.8	3.856	0	176.57	17	2640	17
FALSE	High	IsMasterProtein	A8K509	cDNA FLJ75931, highly similar to Homo sapiens Yip1 interacting factor homolog A (S. cerevisiae) (YIF1A), mRNA OS=Homo sapiens PE=2 SV=1	0	9.94	4.09556	1	6	1	1	293	32	8.95	High	High	Peak Found	High		1.903	68.903	131.097	74.9	62.9	125.1	137.1	0.52	0	5.69	1	90	1
FALSE	High	IsMasterProtein	A8K0C2	cDNA FLJ75950 OS=Homo sapiens PE=2 SV=1	0	16.794	11.7216	2	6	2	1	273	28.8	8.91	Peak Found	Peak Found	High	High		5.065	32.9755	167.024	31.8	34.1	168.2	165.9	0.389	0	7.66	2	200	2
FALSE	High	IsMasterProtein	A8K4M5	cDNA FLJ76043, highly similar to Homo sapiens cyclin T1 (CCNT1), mRNA OS=Homo sapiens PE=2 SV=1	0	27.056	7.98898	3	16	3	1	726	80.5	8.69	Peak Found	Peak Found	High	High		3.226	47.3269	152.673	37.4	57.2	162.6	142.8	0.292	0	19.42	3	181	3
FALSE	High	IsMasterProtein	A8KA74	cDNA FLJ76065 OS=Homo sapiens PE=2 SV=1	0	47.695	7.46791	5	29	5	1	857	97.6	7.69	High	High	High	High		1.795	71.5623	128.438	71.9	71.2	128.1	128.8	0.456	0	37.51	5	607	5
FALSE	High	IsMasterProtein	A8K2I7	cDNA FLJ76072, highly similar to Homo sapiens GIPC PDZ domain containing family, member 1 (GIPC1), transcript variant 1, mRNA OS=Homo sapiens PE=2 SV=1	0	74.527	27.3273	8	34	8	1	333	36	6.28	High	High	High	High		4.382	37.1582	162.842	36.2	38.1	163.8	161.9	2.36	0	45.99	8	831	8
FALSE	High	IsMasterProtein	A8K2P6	cDNA FLJ76083, highly similar to Homo sapiens zinc finger protein 503 (ZNF503), mRNA OS=Homo sapiens PE=2 SV=1	0.001	4.566	3.40557	1	2	1	1	646	62.5	8.62	Not Found	Not Found	Not Found	High		100		200				200	0.116	0	2.72	1	31	1
FALSE	High	IsMasterProtein	A8K359	cDNA FLJ76102, highly similar to Homo sapiens excision repair cross-complementing rodent repair deficiency, complementation group 3 (xeroderma pigmentosum group B complementing) (ERCC3), mRNA OS=Homo sapiens PE=2 SV=1	0	23.025	8.05627	3	8	3	1	782	89.2	7.23	High	High	High	High		1.936	68.1211	131.879	71.2	65.1	128.8	134.9	0.151	0	8.8	3	270	3
FALSE	High	IsMasterProtein	A8K9T8	cDNA FLJ76106, highly similar to Homo sapiens neurolysin (metallopeptidase M3 family) (NLN), mRNA OS=Homo sapiens PE=2 SV=1	0	210.177	24.7159	13	134	13	1	704	80.6	6.6	High	High	High	High		1.418	82.7106	117.289	83.4	82	116.6	118	5.683	0	178.49	13	3039	13
FALSE	High	IsMasterProtein	A8K3Y8	cDNA FLJ76141 OS=Homo sapiens PE=2 SV=1	0	73.727	33.3333	6	36	6	1	297	33.7	7.31	High	High	High	High		1.503	79.9023	120.098	80.3	79.5	119.7	120.5	2.162	0	41.99	6	970	6
FALSE	High	IsMasterProtein	A8K4A2	cDNA FLJ76153, highly similar to Homo sapiens potassium channel tetramerisation domain containing 18 (KCTD18), mRNA OS=Homo sapiens PE=2 SV=1	0.002	3.607	3.28638	1	2	1	1	426	46.7	9.01	Not Found	Not Found	High	Not Found		100		200			200		0.096	0	1.79	1	20	1
FALSE	High	IsMasterProtein	A8K4A8	cDNA FLJ76156, highly similar to Homo sapiens aspartyl-tRNA synthetase 2 (DARS2), mRNA OS=Homo sapiens PE=2 SV=1	0	159.785	29.7674	15	86	15	1	645	73.5	7.84	High	High	High	High		1.077	96.291	103.709	95.2	97.4	104.8	102.6	3.245	0	113.25	15	1489	15
FALSE	Medium	IsMasterProtein	A8K4F5	cDNA FLJ76164, highly similar to Homo sapiens ring finger protein 166 (RNF166), mRNA OS=Homo sapiens PE=2 SV=1	0.015	1.656	7.59494	1	2	1	1	237	26.1	8.06	Not Found	Not Found	Not Found	Not Found									0.194	0	0	1	26	1
FALSE	High	IsMasterProtein	A8K4K9	cDNA FLJ76169 OS=Homo sapiens PE=2 SV=1	0	75.665	25.2525	4	43	4	1	297	34.8	6.81	High	High	High	High		1.235	89.4665	110.533	94	85	106	115	2.594	0	50.92	4	868	4
FALSE	High	IsMasterProtein	A8K4S8	cDNA FLJ76176, highly similar to Homo sapiens carnitine deficiency-associated, expressed in ventricle 1 (CDV1), transcript variant 1, mRNA OS=Homo sapiens PE=2 SV=1	0	16.727	4.73373	2	6	2	1	676	79.7	8.92	Peak Found	Peak Found	High	High		6.379	27.1048	172.895	23.4	30.8	176.6	169.2	0.101	0	9	2	197	2
FALSE	High	IsMasterProtein	A8K4Z6	cDNA FLJ76180 OS=Homo sapiens PE=2 SV=1	0	5.419	2.10016	1	2	1	1	619	70.5	9.83	Not Found	Not Found	Not Found	Not Found									0.051	0	2.24	1	50	1
FALSE	High	IsMasterProtein	A8K575	cDNA FLJ76190, highly similar to Homo sapiens START domain containing 7 (STARD7), transcript variant 1, mRNA OS=Homo sapiens PE=2 SV=1	0	20.194	15.9322	3	8	3	1	295	34.6	5.99	Peak Found	Peak Found	High	High	Acetyl [N-Term]	3.646	43.0486	156.951	51.6	34.5	148.4	165.5	0.369	0	6.63	2	289	3
FALSE	High	IsMasterProtein	A8K335	cDNA FLJ76254, highly similar to Homo sapiens gamma-glutamyl hydrolase (GGH), mRNA OS=Homo sapiens PE=2 SV=1	0	38.243	16.9811	5	25	5	1	318	36	7.42	High	High	High	High		1.239	89.3411	110.659	95	83.7	105	116.3	1.512	0	33.54	5	340	5
FALSE	High	IsMasterProtein	A8K4T6	cDNA FLJ76282, highly similar to Homo sapiens proteasome (prosome, macropain) 26S subunit, non-ATPase, 5 (PSMD5), mRNA OS=Homo sapiens PE=2 SV=1	0	153.516	33.1349	12	108	12	1	504	56.2	5.57	High	High	High	High		1.302	86.8686	113.131	86.5	87.3	113.5	112.7	5.494	0	144.35	12	2142	12
FALSE	High	IsMasterProtein	A8K5A0	cDNA FLJ76288, highly similar to Homo sapiens midline 1 (Opitz/BBB syndrome) (MID1), transcript variant 1, mRNA OS=Homo sapiens PE=2 SV=1	0	128.273	22.4888	10	68	10	1	667	75.2	6.8	High	High	High	High		1.888	69.2437	130.756	69.3	69.2	130.7	130.8	1.683	0	93.56	10	1587	10
FALSE	High	IsMasterProtein	A8K719	cDNA FLJ76413, highly similar to Homo sapiens core-binding factor, beta subunit (CBFB), transcript variant 1, mRNA OS=Homo sapiens PE=2 SV=1	0	60.408	23.5294	5	32	5	1	187	21.9	5.8	High	High	High	High		1.884	69.3475	130.653	68.6	70.1	131.4	129.9	5.813	0	44.26	5	746	5
FALSE	High	IsMasterProtein	A8K6X9	cDNA FLJ76427, highly similar to Homo sapiens SH2 domain binding protein 1 (tetratricopeptide repeat containing) (SH2BP1), mRNA OS=Homo sapiens PE=2 SV=1	0	22.82	5.7971	5	14	5	1	1173	133.4	6.77	Peak Found	Peak Found	High	High		3.768	41.9504	158.05	34.3	49.6	165.7	150.4	0.182	0	17.57	5	152	5
FALSE	High	IsMasterProtein	A8K8B0	cDNA FLJ76434, highly similar to Homo sapiens protein phosphatase 2 (formerly 2A), regulatory subunit A (PR 65), beta isoform (PPP2R1B), transcript variant 2, mRNA OS=Homo sapiens PE=2 SV=1	0	102.794	19.7901	7	48	5	1	667	73.5	5.1	Peak Found	Peak Found	High	High	Acetyl [N-Term]	7.351	23.9505	176.049	19.8	28.1	180.2	171.9	0.901	0	71.35	6	1701	7
FALSE	High	IsMasterProtein	A8K8N1	cDNA FLJ76440, highly similar to Homo sapiens TRIAD3 protein (TRIAD3), transcript variant 1, mRNA OS=Homo sapiens PE=2 SV=1	0	8.174	3.25027	2	6	2	1	923	105.8	5.02	Not Found	Not Found	High	High		100		200			200	200	0.101	0	2.13	2	48	2
FALSE	High	IsMasterProtein	A8K9T3	cDNA FLJ76467, highly similar to Homo sapiens acyl-CoA synthetase long-chain family member 1 (ACSL1), mRNA OS=Homo sapiens PE=2 SV=1	0	25.54	10.8883	6	17	6	1	698	77.9	7.18	High	High	High	High		1.748	72.7823	127.218	75.8	69.7	124.2	130.3	0.512	0	14.2	6	80	6
FALSE	High	IsMasterProtein	A8K9X5	cDNA FLJ76472, highly similar to Homo sapiens Fas (TNFRSF6) associated factor 1 (FAF1), transcript variant 1, mRNA OS=Homo sapiens PE=2 SV=1	0	36.355	8.30769	5	28	5	1	650	73.9	4.88	High	High	High	High		1.691	74.3198	125.68	75.2	73.4	124.8	126.6	0.655	0	33.7	5	428	5
FALSE	High	IsMasterProtein	A8K6D2	cDNA FLJ76620, highly similar to Homo sapiens C2f protein (C2F), mRNA OS=Homo sapiens PE=2 SV=1	0	48.771	28.2787	5	29	5	1	244	26.7	9.17	High	High	High	High		1.889	69.2362	130.764	69.2	69.2	130.8	130.8	1.738	0	36.03	5	495	5
FALSE	High	IsMasterProtein	A8K9B2	cDNA FLJ76725, highly similar to Homo sapiens L-2-hydroxyglutarate dehydrogenase (L2HGDH), mRNA OS=Homo sapiens PE=2 SV=1	0	40.069	12.959	5	20	5	1	463	50.4	8.35	High	High	High	High		0.971	101.452	98.5476	107	95.9	93	104.1	0.743	0	24.41	5	336	5
FALSE	High	IsMasterProtein	A8K0J3	cDNA FLJ76732, highly similar to Homo sapiens TAO kinase 3 (TAOK3), mRNA OS=Homo sapiens PE=2 SV=1	0	31.913	7.90646	5	14	3	1	898	105.3	7.37	Peak Found	High	High	Peak Found		1.668	74.959	125.041	61.8	88.1	138.2	111.9	0.271	0	17.93	5	193	5
FALSE	High	IsMasterProtein	A8K1M4	cDNA FLJ76754, highly similar to Homo sapiens MIS12 homolog (yeast) (MIS12), mRNA OS=Homo sapiens PE=2 SV=1	0.001	4.827	5.36585	1	2	1	1	205	24.1	5.69	Peak Found	Not Found	High	Not Found		1.848	70.2231	129.777	70.2		129.8		0.179	0	1.94	1	25	1
FALSE	High	IsMasterProtein	A8K1U9	cDNA FLJ76762, highly similar to Homo sapiens suppressor of zeste 12 homolog (Drosophila) (SUZ12), mRNA OS=Homo sapiens PE=2 SV=1	0	36.063	7.98376	4	21	4	1	739	83	8.81	High	High	High	High		6.413	26.9788	173.021	26.7	27.3	173.3	172.7	0.567	0	21.58	4	199	4
FALSE	High	IsMasterProtein	A8K492	cDNA FLJ76789, highly similar to Homo sapiens methionine-tRNA synthetase (MARS), mRNA OS=Homo sapiens PE=2 SV=1	0	294.111	35.2222	25	169	25	1	900	101.1	6.16	High	High	High	High		2.232	61.8737	138.126	62.1	61.7	137.9	138.3	8.512	0	208.43	25	2892	25
FALSE	High	IsMasterProtein	A8K588	cDNA FLJ76823, highly similar to Homo sapiens splicing factor, arginine/serine-rich 6 (SFRS6), mRNA OS=Homo sapiens PE=2 SV=1	0	102.605	18.0233	7	108	4	1	344	39.5	11.4	High	High	High	High		1.33	85.839	114.161	86.2	85.4	113.8	114.6	9	2	114.69	7	1645	7
FALSE	High	IsMasterProtein	A8K5A6	cDNA FLJ76827, highly similar to Homo sapiens BUB1 budding uninhibited by benzimidazoles 1 homolog (yeast) (BUB1), mRNA OS=Homo sapiens PE=2 SV=1	0	27.711	3.13364	2	8	2	1	1085	122.3	6.47	Not Found	Not Found	High	High		100		200			200	200	0.118	0	10.79	2	253	2
FALSE	High	IsMasterProtein	A8K607	cDNA FLJ76855, highly similar to Homo sapiens exportin 7 (XPO7), mRNA OS=Homo sapiens PE=2 SV=1	0	199.787	20.0552	16	104	16	1	1087	123.8	6.34	High	High	High	High	Acetyl [N-Term]	1.292	87.2415	112.759	80.8	93.6	119.2	106.4	2.051	0	120.74	15	2371	16
FALSE	High	IsMasterProtein	A8K690	cDNA FLJ76863, highly similar to Homo sapiens stress-induced-phosphoprotein 1 (Hsp70/Hsp90-organizing protein) (STIP1), mRNA OS=Homo sapiens PE=2 SV=1	0	247.58	32.2284	18	245	18	1	543	62.6	6.8	High	High	High	High	Acetyl [N-Term]	1.176	91.9252	108.075	92	91.9	108	108.1	13.424	0	308.61	18	3702	18
FALSE	High	IsMasterProtein	A8K6G9	cDNA FLJ76871, highly similar to Homo sapiens DEAH (Asp-Glu-Ala-His) box polypeptide 38 (DHX38), mRNA OS=Homo sapiens PE=2 SV=1	0	55.819	8.55746	8	31	8	1	1227	140.4	6.54	High	High	High	High		2.977	50.2845	149.716	49.9	50.7	150.1	149.3	0.383	0	31.76	8	603	7
FALSE	High	IsMasterProtein	A8K6J9	cDNA FLJ76879, highly similar to Homo sapiens DEAH (Asp-Glu-Ala-His) box polypeptide 8 (DHX8), mRNA OS=Homo sapiens PE=2 SV=1	0	75.913	13.1967	11	33	11	1	1220	139.3	8.4	Peak Found	Peak Found	High	High	Acetyl [N-Term]	4.876	34.0378	165.962	35.3	32.8	164.7	167.2	0.436	0	38.67	10	602	11
FALSE	High	IsMasterProtein	A8K6L3	cDNA FLJ76883, highly similar to Homo sapiens FKSG44 gene (FKSG44), mRNA OS=Homo sapiens PE=2 SV=1	0	7.356	3.01724	1	2	1	1	464	51.1	6.11	Peak Found	Not Found	High	Not Found		1.453	81.5458	118.454	81.5		118.5		0.096	0	3.38	1	58	1
FALSE	High	IsMasterProtein	A8K6Q4	cDNA FLJ76888, highly similar to Homo sapiens RNA binding motif protein 6 (RBM6), mRNA OS=Homo sapiens PE=2 SV=1	0	10.494	3.2057	2	4	2	1	1123	128.5	6.32	Not Found	High	High	Peak Found		2.881	59.1474	170.426		59.1	200	140.9	0.058	0	3.69	2	74	2
FALSE	High	IsMasterProtein	A8K7F7	cDNA FLJ76913, highly similar to Homo sapiens F-box protein 7 (FBXO7), mRNA OS=Homo sapiens PE=2 SV=1	0	9.644	3.2567	1	4	1	1	522	58.5	6.55	Peak Found	Peak Found	High	High		14.054	13.2857	186.714	15.2	11.4	184.8	188.6	0.122	0	6.12	1	128	1
FALSE	High	IsMasterProtein	A8K7X9	cDNA FLJ76922, highly similar to Homo sapiens zinc finger protein 272 (ZNF272), mRNA OS=Homo sapiens PE=2 SV=1	0.007	2.483	2.84698	1	2	1	1	562	63.7	7.06	Not Found	Not Found	Not Found	High		100		200				200	0.105	0	0	1	0	1
FALSE	High	IsMasterProtein	A8K800	cDNA FLJ76924, highly similar to Homo sapiens brix domain containing 1 (BXDC1), mRNA OS=Homo sapiens PE=2 SV=1	0	31.719	9.80392	2	16	2	1	306	35.6	9.99	High	High	High	High		1.268	88.1801	111.82	77.2	99.2	122.8	100.8	0.833	0	24.78	2	302	2
FALSE	High	IsMasterProtein	A8K8N5	cDNA FLJ76940, highly similar to Homo sapiens ubiquitin specific peptidase 8 (USP8), mRNA OS=Homo sapiens PE=2 SV=1	0	51.623	9.66011	6	30	6	1	1118	127.4	8.56	Peak Found	Peak Found	High	High		3.162	48.0511	151.949	57.4	38.7	142.6	161.3	0.259	0	42.88	6	548	6
FALSE	High	IsMasterProtein	A8KAL2	cDNA FLJ76981, highly similar to Homo sapiens golgi autoantigen, golgin subfamily a, 5 (GOLGA5), mRNA OS=Homo sapiens PE=2 SV=1	0	85.484	17.7839	8	53	8	1	731	82.9	5.83	High	High	High	High	Acetyl [N-Term]	0.794	111.502	88.4983	109.7	113.3	90.3	86.7	1.154	0	55.25	7	719	8
FALSE	High	IsMasterProtein	A8K0K1	cDNA FLJ76996 OS=Homo sapiens PE=2 SV=1	0	5.144	4.34783	1	2	1	1	391	42.4	5.96	Not Found	Not Found	Not Found	High		100		200				200	0.11	0	2.02	1	18	1
FALSE	High	IsMasterProtein	A8K4U4	cDNA FLJ77113 OS=Homo sapiens PE=2 SV=1	0	11.424	2.86738	2	10	1	1	837	95.5	6.29	High	Peak Found	High	High		1.397	83.4373	116.563	89.4	77.5	110.6	122.5	0.174	0	9.9	2	105	2
FALSE	High	IsMasterProtein	A8KAN3	cDNA FLJ77226, highly similar to Homo sapiens p21 activated kinase 1B (PAK1B) mRNA OS=Homo sapiens PE=2 SV=1	0	40.295	9.22242	3	31	2	1	553	61.6	5.44	Peak Found	Peak Found	High	High		3.456	44.8788	155.121	39.3	50.5	160.7	149.5	0.778	0	38.25	3	800	3
FALSE	High	IsMasterProtein	A8K7Z3	cDNA FLJ77229, highly similar to Homo sapiens GRIP1 associated protein 1 (GRIPAP1), transcript variant 1, mRNA OS=Homo sapiens PE=2 SV=1	0	100.204	20.214	11	43	11	1	841	95.9	5.07	High	High	High	High	Acetyl [N-Term]	1.556	78.2377	121.762	65.3	91.2	134.7	108.8	0.796	0	59.01	9	1130	11
FALSE	High	IsMasterProtein	A8K171	cDNA FLJ77253, highly similar to Homo sapiens nuclear receptor interacting protein 1 (NRIP1), mRNA OS=Homo sapiens PE=2 SV=1	0	6.622	3.45423	2	4	2	1	1158	126.8	7.99	Not Found	Not Found	High	Not Found		100		200			200		0.067	0	0	2	22	2
FALSE	High	IsMasterProtein	A8K594	cDNA FLJ77256, highly similar to Homo sapiens SH3-domain binding protein 4 (SH3BP4), mRNA OS=Homo sapiens PE=2 SV=1	0	21.959	5.08827	4	20	4	1	963	107.4	7.59	High	Peak Found	High	High		3.952	40.3877	159.612	45.2	35.6	154.8	164.4	0.264	0	22.47	4	190	4
FALSE	Medium	IsMasterProtein	A8K1A2	cDNA FLJ77265, highly similar to Homo sapiens integrin beta 1 binding protein 1 (ITGB1BP1), transcript variant 1, mRNA OS=Homo sapiens PE=2 SV=1	0.011	1.915	5.5	1	2	1	1	200	21.8	6.34	Not Found	Not Found	Not Found	High									0.194	0	1.71	1	29	1
FALSE	High	IsMasterProtein	A8K6A2	cDNA FLJ77317, highly similar to Homo sapiens retinoblastoma binding protein 7 (RBBP7), mRNA OS=Homo sapiens PE=2 SV=1	0	161.063	21.8824	6	76	2	1	425	47.8	5.08	High	High	High	High		2.281	60.9533	139.047	63.2	58.7	136.8	141.3	5.31	0	131.7	6	1772	6
FALSE	High	IsMasterProtein	A8K6Q5	cDNA FLJ77327, highly similar to Homo sapiens cyclin H (CCNH), mRNA OS=Homo sapiens PE=2 SV=1	0	17.957	8.66873	2	12	2	1	323	37.6	7.15	High	High	High	High		3.295	46.5618	153.438	47	46.1	153	153.9	0.413	0	16.6	2	204	2
FALSE	High	IsMasterProtein	A8K7A1	cDNA FLJ77346, highly similar to Homo sapiens DEAD (Asp-Glu-Ala-Asp) box polypeptide 49 (DDX49), mRNA OS=Homo sapiens PE=2 SV=1	0	39.261	10.559	4	18	4	1	483	54.3	8.98	High	High	High	High	Acetyl [N-Term]	2.433	58.2663	141.734	57.2	59.4	142.8	140.6	0.585	0	11.29	3	604	4
FALSE	High	IsMasterProtein	A8K8D2	cDNA FLJ77371, highly similar to Homo sapiens MLF1 interacting protein (MLF1IP), mRNA OS=Homo sapiens PE=2 SV=1	0	9.354	4.30622	1	4	1	1	418	47.5	9.13	Peak Found	Peak Found	High	High		13.268	14.0175	185.982	12.9	15.1	187.1	184.9	0.105	0	6.85	1	89	1
FALSE	Medium	IsMasterProtein	A8K8D3	cDNA FLJ77372, highly similar to Homo sapiens SUMO/sentrin specific peptidase family member 8 (SENP8), mRNA OS=Homo sapiens PE=2 SV=1	0.016	1.56	8.01887	1	1	1	1	212	24	5.97	High	Not Found	Peak Found	Not Found		0.471	135.961	64.0392	136		64		0.259	0	0	1
FALSE	High	IsMasterProtein	A8K9B9	cDNA FLJ77391, highly similar to Homo sapiens EH-domain containing 4 (EHD4), mRNA OS=Homo sapiens PE=2 SV=1	0	61.525	19.2237	8	42	8	1	541	61.1	6.65	High	High	High	High		1.195	91.1223	108.878	92.1	90.1	107.9	109.9	1.352	0	51.85	8	607	8
FALSE	High	IsMasterProtein	A8KAK5	cDNA FLJ77399, highly similar to Homo sapiens cofactor required for Sp1 transcriptional activation, subunit 2, 150kDa (CRSP2), mRNA OS=Homo sapiens PE=2 SV=1	0	14.806	2.5447	2	10	2	1	1454	160.5	8.73	High	High	High	High		2.56	56.1816	143.818	64.5	47.8	135.5	152.2	0.09	0	9.02	2	142	2
FALSE	High	IsMasterProtein	A8KAQ5	cDNA FLJ77404, highly similar to Homo sapiens small nuclear ribonucleoprotein 70kDa polypeptide (RNP antigen) (SNRP70), transcript variant 1, mRNA OS=Homo sapiens PE=2 SV=1	0	101.348	17.849	8	88	8	1	437	51.5	10.01	High	High	High	High		1.167	92.3047	107.695	90.8	93.9	109.2	106.1	7.913	0	100.09	8	1579	8
FALSE	High	IsMasterProtein	A8K2V5	cDNA FLJ77451, highly similar to Homo sapiens nuclear factor of activated T-cells, cytoplasmic, calcineurin-dependent 3 (NFATC3), transcript variant 1, mRNA OS=Homo sapiens PE=2 SV=1	0	9.79	2.69767	2	3	2	1	1075	115.5	6.37	Not Found	Peak Found	Not Found	High	Acetyl [N-Term]	8.964	20.0731	179.927		20.1		179.9	0.122	0	1.69	1	64	2
FALSE	High	IsMasterProtein	A8K4U2	cDNA FLJ77467, highly similar to Homo sapiens dipeptidylpeptidase 8 (DPP8), transcript variant 3, mRNA OS=Homo sapiens PE=2 SV=1	0	15.535	4.45434	2	6	1	1	898	103.1	5.9	Not Found	Not Found	High	Not Found		100		200			200		0.103	0	6.96	2	177	2
FALSE	High	IsMasterProtein	A8K799	cDNA FLJ77471, highly similar to Homo sapiens cyclin C (CCNC), transcript variant 1, mRNA OS=Homo sapiens PE=2 SV=1	0	7.11	6.00707	2	16	1	1	283	33.2	7.33	High	High	High	High		1.8	71.4194	128.581		71.4		128.6	0.585	0	7.07	2	101	2
FALSE	High	IsMasterProtein	A8K9U2	cDNA FLJ77474, highly similar to Homo sapiens ankyrin repeat and SOCS box-containing 6 (ASB6), transcript variant 1, mRNA OS=Homo sapiens PE=2 SV=1	0	8.486	4.27553	1	2	1	1	421	47.1	6.01	Not Found	Not Found	High	Not Found		100		200			200		0.086	0	3.62	1	36	1
FALSE	High	IsMasterProtein	A8K5C5	cDNA FLJ77534, highly similar to Homo sapiens membrane protein, palmitoylated 5 (MAGUK p55 subfamily member 5) (MPP5), mRNA OS=Homo sapiens PE=2 SV=1	0	21.872	6.51852	3	12	3	1	675	77.3	6.07	High	High	High	High	Acetyl [N-Term]	3.069	49.1512	150.849	53.2	45.1	146.8	154.9	0.233	0	11.52	2	234	3
FALSE	High	IsMasterProtein	A8K5Q1	cDNA FLJ77548, highly similar to Homo sapiens bin3, bicoid-interacting 3, homolog (Drosophila) (BCDIN3), mRNA OS=Homo sapiens PE=2 SV=1	0	33.453	4.64441	2	38	2	1	689	74.3	9.57	High	High	High	High		2.366	59.4157	140.584	55.8	63	144.2	137	0.343	0	61.46	2	563	2
FALSE	High	IsMasterProtein	A8K874	cDNA FLJ77588, highly similar to Homo sapiens MAK10 homolog, amino-acid N-acetyltransferase subunit, (S. cerevisiae) (MAK10), mRNA OS=Homo sapiens PE=2 SV=1	0	9.802	2.34483	1	4	1	1	725	83.6	7.05	Peak Found	Peak Found	High	High		1.708	73.8685	126.131	67.5	80.2	132.5	119.8	0.055	0	6.1	1	156	1
FALSE	High	IsMasterProtein	A8K905	cDNA FLJ77615, highly similar to Homo sapiens nucleolar complex associated 3 homolog (S. cerevisiae) (NOC3L), mRNA OS=Homo sapiens PE=2 SV=1	0	39.222	5.625	3	18	3	1	800	92.5	9.1	High	High	High	High		1.267	88.2132	111.787	83.5	92.9	116.5	107.1	0.299	0	25.48	3	501	3
FALSE	High	IsMasterProtein	A8K940	cDNA FLJ77630, highly similar to Homo sapiens BPY2 interacting protein 1, mRNA OS=Homo sapiens PE=1 SV=1	0	47.895	7.45987	5	22	5	1	1059	112.2	7.3	High	High	High	High		1.297	87.0867	112.913	81.9	92.3	118.1	107.7	0.54	0	18.14	5	213	5
FALSE	High	IsMasterProtein	A8K8A4	cDNA FLJ77640, highly similar to Homo sapiens copine II (CPNE2), mRNA OS=Homo sapiens PE=2 SV=1	0	9.368	4.92701	2	8	2	1	548	61.2	6.07	Peak Found	Peak Found	High	High		2.645	54.8707	145.129	52.8	56.9	147.2	143.1	0.194	0	10.24	2	176	2
FALSE	High	IsMasterProtein	A8K4P6	cDNA FLJ77656, highly similar to Homo sapiens UV radiation resistance associated gene (UVRAG), mRNA OS=Homo sapiens PE=2 SV=1	0	9.34	4.57797	3	7	3	1	699	78.1	8.29	Not Found	Peak Found	High	High		3.43	45.1459	154.854		45.1		154.9	0.179	0	3.83	3	16	2
FALSE	High	IsMasterProtein	A8K8L2	cDNA FLJ77676, highly similar to Homo sapiens TRM1 tRNA methyltransferase 1 homolog (S. cerevisiae) (TRMT1), mRNA OS=Homo sapiens PE=2 SV=1	0	14.872	4.7041	2	6	2	1	659	72.1	7.75	Peak Found	Peak Found	High	High		2.544	56.4369	143.563	53.2	59.7	146.8	140.3	0.119	0	10.5	2	119	2
FALSE	High	IsMasterProtein	A8KA56	cDNA FLJ77678, highly similar to Homo sapiens DEAD (Asp-Glu-Ala-Asp) box polypeptide 23, mRNA OS=Homo sapiens PE=2 SV=1	0	113.377	20.2439	14	90	14	1	820	95.6	9.57	High	High	High	High		1.353	84.9816	115.018	84.1	85.9	115.9	114.1	1.716	0	110.3	14	1124	14
FALSE	High	IsMasterProtein	A8K3X3	cDNA FLJ77685 OS=Homo sapiens PE=2 SV=1	0	20.292	12.9213	3	12	3	1	356	40.1	7.05	Not Found	Peak Found	High	High		3.206	47.5479	152.452		47.5		152.5	0.425	0	15.75	3	187	3
FALSE	High	IsMasterProtein	A8K3C5	cDNA FLJ77715, highly similar to Homo sapiens cisplatin resistance-associated overexpressed protein(LUC7A), mRNA OS=Homo sapiens PE=2 SV=1	0	109.331	27.0833	9	86	9	1	432	51.4	9.79	High	High	High	High	Acetyl [N-Term]	0.764	113.35	86.6502	114.1	112.6	85.9	87.4	7.031	0	91.97	9	2284	9
FALSE	High	IsMasterProtein	A8K9G4	cDNA FLJ77745, highly similar to Homo sapiens neutral sphingomyelinase (N-SMase) activation associated factor (NSMAF), mRNA OS=Homo sapiens PE=2 SV=1	0	22.629	7.30643	4	10	4	1	917	104.3	6.23	Peak Found	Peak Found	High	High		2.362	59.4819	140.518	62.9	56.1	137.1	143.9	0.207	0	13.47	4	170	4
FALSE	High	IsMasterProtein	A8K140	cDNA FLJ77748 OS=Homo sapiens PE=2 SV=1	0	21.111	4.29082	3	10	3	1	839	94.4	6.81	High	High	High	High		2.819	52.3725	147.627	43.8	61	156.2	139	0.212	0	10.95	3	183	3
FALSE	High	IsMasterProtein	A8K8U1	cDNA FLJ77762, highly similar to Homo sapiens cullin-associated and neddylation-dissociated 1 (CAND1), mRNA OS=Homo sapiens PE=2 SV=1	0	310.925	27.1545	24	270	24	1	1230	136.2	5.83	High	High	High	High	Acetyl [N-Term]	1.147	93.1575	106.842	93.1	93.3	106.9	106.7	3.948	0	326.15	23	5166	24
FALSE	High	IsMasterProtein	A8K7Q1	cDNA FLJ77770, highly similar to Homo sapiens nucleobindin 1 (NUCB1), mRNA OS=Homo sapiens PE=2 SV=1	0	124.2	32.9718	10	86	10	1	461	53.9	5.25	High	High	High	High		5.474	30.8907	169.109	31.7	30.1	168.3	169.9	3.101	0	122.04	10	1504	10
FALSE	High	IsMasterProtein	A8K8Y8	cDNA FLJ77796, highly similar to Homo sapiens evolutionarily conserved G-patch domain containing protein mRNA OS=Homo sapiens PE=2 SV=1	0	29.317	5.47798	3	14	3	1	931	103.3	7.15	High	High	High	High		1.856	70.0292	129.971	70.1	69.9	129.9	130.1	0.284	0	17.99	3	265	3
FALSE	High	IsMasterProtein	A8JZZ8	cDNA FLJ77826, highly similar to Homo sapiens BCS1-like (yeast), mRNA OS=Homo sapiens PE=2 SV=1	0	43.487	14.7971	4	16	4	1	419	47.5	8.5	High	High	High	High		1.462	81.2348	118.765	89.2	73.3	110.8	126.7	0.738	0	22.72	4	464	4
FALSE	High	IsMasterProtein	A8K962	cDNA FLJ77827, highly similar to Human upstream binding factor (hUBF) OS=Homo sapiens PE=2 SV=1	0	165.759	17.1466	11	90	11	1	764	89.4	5.71	High	High	High	High		2.154	63.4214	136.579	65.2	61.7	134.8	138.3	2.574	0	123.01	11	1448	11
FALSE	High	IsMasterProtein	A8K3W9	cDNA FLJ77842 OS=Homo sapiens PE=2 SV=1	0	591.56	58.2873	21	528	1	1	362	41.6	5.07	High	High	Peak Found	Peak Found		1.095	95.4844	104.516	96.3	94.6	103.7	105.4	7942.28	0	714.01	20	10262	21
FALSE	High	IsMasterProtein	A8K4N4	cDNA FLJ77844, highly similar to Homo sapiens TNFAIP3 interacting protein 1, mRNA OS=Homo sapiens PE=2 SV=1	0	17.923	5.97484	3	10	3	1	636	71.8	6.57	Not Found	Not Found	High	High		100		200			200	200	0.225	0	12.08	3	181	3
FALSE	High	IsMasterProtein	A8K2S7	cDNA FLJ77865 OS=Homo sapiens PE=2 SV=1	0	26.096	15.6977	3	12	3	1	344	38.9	9.01	High	Peak Found	High	High		2.972	50.3533	149.647	56.8	44	143.2	156	0.585	0	14.59	3	253	3
FALSE	High	IsMasterProtein	A8K005	cDNA FLJ77896, highly similar to Homo sapiens Ras homolog enriched in brain (RHEB), mRNA OS=Homo sapiens PE=2 SV=1	0	34.101	28.2609	3	18	3	1	184	20.5	5.92	High	High	High	High		2.749	53.3443	146.656	52.1	54.6	147.9	145.4	1.61	0	25.83	3	492	3
FALSE	High	IsMasterProtein	A8K4Q9	cDNA FLJ77931 OS=Homo sapiens PE=2 SV=1	0	122.228	14.6129	11	64	10	1	917	102.4	7.36	High	High	High	High		1.358	84.8343	115.166	85.4	84.3	114.6	115.7	1.243	0	75.2	11	1378	11
FALSE	High	IsMasterProtein	A8K9E1	cDNA FLJ77957, highly similar to Homo sapiens HBS1-like (S. cerevisiae) (HBS1L), mRNA OS=Homo sapiens PE=2 SV=1	0	134.431	24.269	11	60	11	1	684	75.5	6.61	High	High	High	High		1.42	82.6405	117.36	83.4	81.9	116.6	118.1	1.848	0	75.47	11	997	11
FALSE	High	IsMasterProtein	A8K099	cDNA FLJ77959, highly similar to Homo sapiens protein kinase, cAMP-dependent, regulatory, type I, beta (PRKAR1B), mRNA OS=Homo sapiens PE=2 SV=1	0	19.607	12.0735	4	14	3	1	381	43.1	5.85	Peak Found	Peak Found	High	High		16.976	11.1262	188.874		11.1		188.9	0.668	0	10.89	4	219	4
FALSE	High	IsMasterProtein	A8K545	cDNA FLJ78016, highly similar to Homo sapiens choroideremia (Rab escort protein 1) (CHM), transcript variant, mRNA OS=Homo sapiens PE=2 SV=1	0.008	2.243	3.21593	2	3	2	1	653	73.4	4.75	Peak Found	Not Found	High	Not Found		0.774	112.719	87.2813	112.7		87.3		0.15	0	3.86	2	16	1
FALSE	High	IsMasterProtein	A8K7A2	cDNA FLJ78084, highly similar to Homo sapiens cell division cycle associated 8, mRNA OS=Homo sapiens PE=2 SV=1	0.001	4.488	4.28571	1	4	1	1	280	31.3	9.86	Not Found	Not Found	High	High									0.145	0	5.04	1	68	1
FALSE	High	IsMasterProtein	A8K1F4	cDNA FLJ78094, highly similar to Homo sapiens myeloid leukemia factor 2, mRNA OS=Homo sapiens PE=1 SV=1	0	16.33	12.9032	2	10	2	1	248	28.1	6.9	Peak Found	Peak Found	High	High		21.344	8.95099	191.049	10.1	7.8	189.9	192.2	0.468	0	15.64	2	258	2
FALSE	High	IsMasterProtein	A8K9A5	cDNA FLJ78114, highly similar to Homo sapiens thymidylate synthetase, mRNA OS=Homo sapiens PE=2 SV=1	0	43.305	26.8371	5	16	5	1	313	35.8	7.24	Peak Found	Peak Found	High	High		26.514	7.26903	192.731	7.4	7.2	192.6	192.8	1.154	0	21.24	5	353	5
FALSE	High	IsMasterProtein	A8K556	cDNA FLJ78217 OS=Homo sapiens PE=2 SV=1	0	47.222	13.4454	2	10	2	1	357	40.3	8.15	High	High	High	High		2.247	61.5907	138.409	58.3	64.9	141.7	135.1	0.848	0	16.93	2	247	2
FALSE	High	IsMasterProtein	A8K0P8	cDNA FLJ78223 OS=Homo sapiens PE=2 SV=1	0	16.006	6.87831	3	8	3	1	756	87	5.72	Peak Found	High	High	Peak Found		2.647	54.8332	145.167	42.7	66.9	157.3	133.1	0.227	0	10.25	3	43	3
FALSE	High	IsMasterProtein	A8K7F6	cDNA FLJ78244, highly similar to Homo sapiens eukaryotic translation initiation factor 4A, isoform 1 (EIF4A1), mRNA OS=Homo sapiens PE=2 SV=1	0	356.545	55.665	22	365	1	1	406	46.1	5.48	Peak Found	Peak Found	High	High		2.405	58.729	141.271	58.3	59.2	141.7	140.8	315.228	32	457.26	22	6718	22
FALSE	High	IsMasterProtein	A8K566	cDNA FLJ78246, highly similar to Homo sapiens splicing factor 3a, subunit 3, 60kDa (SF3A3), mRNA OS=Homo sapiens PE=2 SV=1	0	196.21	23.5529	11	98	11	1	501	58.8	5.43	High	High	High	High		1.187	91.4364	108.564	91.6	91.3	108.4	108.7	6.814	0	137.13	11	3116	11
FALSE	High	IsMasterProtein	A8K313	cDNA FLJ78249, highly similar to Homo sapiens RAD51 associated protein 1, mRNA OS=Homo sapiens PE=2 SV=1	0	7.922	4.26136	1	4	1	1	352	38.4	9.11	Not Found	Not Found	High	High		100		200			200	200	0.11	0	4.96	1	109	1
FALSE	High	IsMasterProtein	A8K6U7	cDNA FLJ78252, highly similar to Homo sapiens heterogeneous nuclear ribonucleoprotein U-like 1 (HNRPUL1), transcript variant 1, mRNA OS=Homo sapiens PE=2 SV=1	0	312.985	25.9346	15	184	15	1	856	95.6	6.92	High	High	High	High		1.319	86.2566	113.743	86.6	85.9	113.4	114.1	6.827	0	279.03	15	4212	15
FALSE	High	IsMasterProtein	A8K3C8	cDNA FLJ78308, highly similar to Homo sapiens praja 1 (PJA1), mRNA OS=Homo sapiens PE=2 SV=1	0	6.002	2.79938	1	2	1	1	643	71	5.17	Not Found	Not Found	Not Found	Not Found									0.077	0	2.31	1	40	1
FALSE	High	IsMasterProtein	A8K0G7	cDNA FLJ78425, highly similar to Homo sapiens zinc fingers and homeoboxes 1 (ZHX1), mRNA OS=Homo sapiens PE=2 SV=1	0.005	2.637	1.60367	1	2	1	1	873	98	5.91	Not Found	Not Found	Not Found	High									0.055	0	2.76	1	41	1
FALSE	High	IsMasterProtein	A8K4B4	cDNA FLJ78441, highly similar to Homo sapiens nucleolar and spindle associated protein 1 (NUSAP1),mRNA OS=Homo sapiens PE=2 SV=1	0	13.653	7.48299	2	6	2	1	441	49.4	9.89	Not Found	Not Found	High	High		100		200			200	200	0.166	0	6.95	2	118	2
FALSE	High	IsMasterProtein	A8KAP9	cDNA FLJ78448, highly similar to Homo sapiens argininosuccinate synthetase (ASS), transcript variant 1, mRNA OS=Homo sapiens PE=2 SV=1	0	12.934	12.8641	5	10	5	1	412	46.5	8.03	Peak Found	High	High	High		1.158	92.6776	107.322	96.1	89.2	103.9	110.8	0.557	0	6.31	5	61	5
FALSE	High	IsMasterProtein	A8K669	cDNA FLJ78452, highly similar to Homo sapiens legumain (LGMN), transcript variant 2, mRNA OS=Homo sapiens PE=2 SV=1	0	20.971	3.9261	1	12	1	1	433	49.4	6.55	High	High	High	High		2.615	55.3203	144.68	55.9	54.8	144.1	145.2	0.212	0	17.28	1	394	1
FALSE	High	IsMasterProtein	A8KAE0	cDNA FLJ78476, highly similar to Homo sapiens WD repeat and HMG-box DNA binding protein 1 (WDHD1), transcript variant 1, mRNA OS=Homo sapiens PE=2 SV=1	0	152.926	19.132	14	63	14	1	1129	125.9	5.62	High	High	High	High		2.699	54.0711	145.929	53.3	54.8	146.7	145.2	0.981	0	79.8	14	1780	13
FALSE	High	IsMasterProtein	A8K2I0	cDNA FLJ78504, highly similar to Homo sapiens keratin 6A (KRT6A), mRNA OS=Homo sapiens PE=2 SV=1	0	65.812	19.5035	9	69	3	1	564	60	8	High	High	Peak Found	Not Found		0.241	178.462	43.0762	156.9	200	43.1		1.297	1	62.03	9	729	9
FALSE	High	IsMasterProtein	A8K2W3	cDNA FLJ78516 OS=Homo sapiens PE=2 SV=1	0	72.964	19.2941	5	38	5	1	425	47.1	5.25	High	High	High	High		1.164	92.4352	107.565	90.2	94.6	109.8	105.4	1.721	0	57.78	5	933	5
FALSE	High	IsMasterProtein	A8K4G7	cDNA FLJ78528, highly similar to Homo sapiens vacuolar protein sorting 4B (yeast) (VPS4B), mRNA OS=Homo sapiens PE=2 SV=1	0	58.335	22.5225	8	51	6	1	444	49.2	6.76	High	High	High	High		2.53	56.657	143.343	57.3	56	142.7	144	2.039	4	48.57	8	596	8
FALSE	High	IsMasterProtein	A8K4W2	cDNA FLJ78635, highly similar to Homo sapiens ATP synthase, H+ transporting, mitochondrial F0 complex, subunit b, isoform 1 (ATP5F1), transcript variant 1, mRNA OS=Homo sapiens PE=2 SV=1	0	62.477	18.75	4	34	4	1	256	28.9	9.36	High	High	High	High		0.988	100.615	99.3845	101.2	100.1	98.8	99.9	2.384	0	44.85	4	665	4
FALSE	High	IsMasterProtein	A8K5G6	cDNA FLJ78646, highly similar to Homo sapiens polymerase (DNA directed), gamma (POLG), mRNA OS=Homo sapiens PE=2 SV=1	0	4.908	1.37207	1	2	1	1	1239	139.5	6.84	Not Found	High	Not Found	Not Found		0.01	200			200			0.034	0	2.05	1	56	1
FALSE	High	IsMasterProtein	A8K5S1	cDNA FLJ78650, highly similar to Homo sapiens mucosa associated lymphoid tissue lymphoma translocation gene 1 (MALT1), transcript variant 1, mRNA OS=Homo sapiens PE=2 SV=1	0	49.227	11.5291	7	26	7	1	824	92.2	5.73	High	High	High	High		3.332	46.1634	153.837	50.8	41.5	149.2	158.5	0.619	0	28.9	7	310	7
FALSE	High	IsMasterProtein	A8K5Y7	cDNA FLJ78655, highly similar to Homo sapiens exportin 5 (XPO5), mRNA OS=Homo sapiens PE=2 SV=1	0	121.829	10.8804	9	57	9	1	1204	136.2	5.9	High	High	High	High	Acetyl [N-Term]	1.422	82.5811	117.419	82.6	82.5	117.4	117.5	0.868	0	70.18	8	1396	8
FALSE	High	IsMasterProtein	A8KA77	cDNA FLJ78669, highly similar to Homo sapiens tetratricopeptide repeat domain 21B (TTC21B), mRNA OS=Homo sapiens PE=2 SV=1	0	12.142	2.35562	2	9	2	1	1316	150.7	7.03	Not Found	Not Found	High	High		100		200			200		0.059	0	6.82	2	176	2
FALSE	High	IsMasterProtein	A8K6U2	cDNA FLJ78675, highly similar to Homo sapiens stroma HMG-box containing protein (HBP2) mRNA OS=Homo sapiens PE=2 SV=1	0	9.591	3.1881	2	4	2	1	941	105.1	8.87	Not Found	Peak Found	High	High		6.522	28.4816	185.759		28.5	200	171.5	0.094	0	2.36	2	42	2
FALSE	High	IsMasterProtein	A8K6V3	cDNA FLJ78677, highly similar to Homo sapiens splicing factor 3b, subunit 3, 130kDa (SF3B3), mRNA OS=Homo sapiens PE=2 SV=1	0	302.34	24.9795	22	255	22	1	1217	135.5	5.21	High	High	High	High		1.378	84.1061	115.894	83.4	84.9	116.6	115.1	4.476	0	303.85	22	5306	22
FALSE	High	IsMasterProtein	A8K6X3	cDNA FLJ78679, highly similar to Homo sapiens DEAD (Asp-Glu-Ala-Asp) box polypeptide 46 (DDX46), mRNA OS=Homo sapiens PE=2 SV=1	0	230.493	27.1318	26	149	26	1	1032	117.4	9.29	High	High	High	High		1.434	82.1616	117.838	80.5	83.8	119.5	116.2	4.264	0	167.81	26	2428	26
FALSE	High	IsMasterProtein	A8K0D4	cDNA FLJ78693, highly similar to Homo sapiens TAF6-like RNA polymerase II, p300/CBP-associated factor (PCAF)-associated factor, 65kDa (TAF6L), mRNA OS=Homo sapiens PE=2 SV=1	0	17.396	3.69775	1	8	1	1	622	67.7	9.06	High	High	High	High		2.568	56.0485	143.951	54.5	57.6	145.5	142.4	0.136	0	10.4	1	194	1
FALSE	High	IsMasterProtein	A8K8N3	cDNA FLJ78740, highly similar to Homo sapiens sperm associated antigen 5 (SPAG5), mRNA OS=Homo sapiens PE=2 SV=1	0	93.079	18.2733	11	40	11	1	1193	134.3	5	Peak Found	Peak Found	High	High		20.176	9.44448	190.556	11.3	7.5	188.7	192.5	0.476	0	55.71	11	948	11
FALSE	High	IsMasterProtein	A8K9T2	cDNA FLJ78744, highly similar to Homo sapiens WD repeat domain 23 (WDR23), transcript variant 1, mRNA OS=Homo sapiens PE=2 SV=1	0.002	3.581	2.1978	1	2	1	1	546	61.8	6.46	Not Found	Peak Found	Not Found	High		7.901	22.4697	177.53		22.5		177.5	0.096	0	1.73	1	34	1
FALSE	High	IsMasterProtein	A8K8P1	cDNA FLJ78752, highly similar to Homo sapiens centromere protein J (CENPJ), mRNA OS=Homo sapiens PE=2 SV=1	0	13.83	3.28849	3	10	3	1	1338	152.9	6.61	Peak Found	Peak Found	High	High		2.639	54.9611	145.039	51.2	58.7	148.8	141.3	0.085	0	9.43	3	138	3
FALSE	High	IsMasterProtein	A8KAC4	cDNA FLJ78754, highly similar to Homo sapiens ankyrin repeat domain 15 (ANKRD15), transcript variant 1, mRNA OS=Homo sapiens PE=2 SV=1	0.003	3.023	1.0355	1	2	1	1	1352	147.2	5.33	Not Found	Not Found	Not Found	High		100		200				200	0.032	0	2.1	1	18	1
FALSE	High	IsMasterProtein	B3KQA0	cDNA FLJ90015 fis, clone HEMBA1000634, highly similar to Homo sapiens Mof4 family associated protein 1 (MRFAP1), mRNA OS=Homo sapiens PE=2 SV=1	0	22.859	18.8976	1	8	1	1	127	14.5	4.64	Peak Found	Peak Found	High	High		17.607	10.7488	189.251	14.8	6.7	185.2	193.3	1.154	0	15.64	1	326	1
FALSE	High	IsMasterProtein	B3KQF0	cDNA FLJ90354 fis, clone NT2RP2003390, highly similar to Translocation protein SEC63 homolog OS=Homo sapiens PE=2 SV=1	0	46.585	14.0789	6	32	6	1	760	87.9	5.2	High	High	High	High		2.181	62.8796	137.12	60.3	65.4	139.7	134.6	0.638	0	31.02	6	438	6
FALSE	High	IsMasterProtein	B3KQF4	cDNA FLJ90373 fis, clone NT2RP2004606, highly similar to Metalloproteinase inhibitor 1 OS=Homo sapiens PE=2 SV=1	0	8.97	18.8406	2	4	2	1	207	23.2	8.1	Not Found	Peak Found	Not Found	High		100		200				200	0.52	0	3.47	2	60	2
FALSE	High	IsMasterProtein	B3KQQ9	cDNA PSEC0048 fis, clone NT2RP2000028, highly similar to Serine protease 23 OS=Homo sapiens PE=2 SV=1	0	5.962	3.39426	1	4	1	1	383	43	9.36	Not Found	Not Found	High	High		100		200			200	200	0.11	0	4.77	1	119	1
FALSE	High	IsMasterProtein	B7Z9P5	cDNA, FLJ78909, highly similar to Homo sapiens intersex-lik (IXL), mRNA OS=Homo sapiens PE=2 SV=1	0	30.827	16.5468	2	17	2	1	139	15	6.28	High	High	High	High		3.72	42.3688	157.631	45.9	38.9	154.1	161.1	2.162	0	24.86	1	437	2
FALSE	High	IsMasterProtein	B7Z9X8	cDNA, FLJ78992 OS=Homo sapiens PE=2 SV=1	0.007	2.454	3.00752	1	4	1	1	266	30.4	8.92	Peak Found	Peak Found	High	High		1.391	83.656	116.344	97.1	70.2	102.9	129.8	0.166	0	3.59	1	39	1
FALSE	High	IsMasterProtein	B7ZA74	cDNA, FLJ79088, highly similar to UV excision repair protein RAD23 homolog B OS=Homo sapiens PE=2 SV=1	0	176.451	35.0515	6	144	1	1	388	40.7	4.94	Not Found	Not Found	Not Found	Not Found									36.276	0	97.52	6	2635	6
FALSE	High	IsMasterProtein	B7ZB83	cDNA, FLJ79447, highly similar to Nucleosome assembly protein 1-like 4 OS=Homo sapiens PE=2 SV=1	0	199.522	45.5959	12	123	10	1	386	44.1	4.67	High	High	High	High	Acetyl [N-Term]	1.271	88.0773	111.923	87.8	88.3	112.2	111.7	16.302	3	134.43	10	2947	12
FALSE	High	IsMasterProtein	B2R4A5	cDNA, FLJ92019, highly similar to Homo sapiens mitochondrial ribosomal protein S14 (MRPS14), nuclear gene encoding mitochondrial protein, mRNA OS=Homo sapiens PE=2 SV=1	0	9.659	11.7188	1	4	1	1	128	15.1	11.5	High	High	Peak Found	Peak Found		1.164	92.4073	107.593	92.7	92.2	107.3	107.8	0.292	0	6.08	1	200	1
FALSE	High	IsMasterProtein	B2R4C9	cDNA, FLJ92044, highly similar to Homo sapiens death-associated protein (DAP), mRNA OS=Homo sapiens PE=2 SV=1	0	10.406	24.5098	1	2	1	1	102	11.2	9.52	Not Found	Peak Found	Not Found	High		2.788	52.7966	147.203		52.8		147.2	0.468	0	4.39	1	74	1
FALSE	Medium	IsMasterProtein	B2R4H6	cDNA, FLJ92093, highly similar to Homo sapiens polymerase (RNA) II (DNA directed) polypeptide F (POLR2F), mRNA OS=Homo sapiens PE=2 SV=1	0.028	0.934	4.72441	1	4	1	1	127	14.5	4.3	Peak Found	Peak Found	High	High		2.355	59.6193	140.381	60	59.3	140	140.7	0.468	0	0	1	38	1
FALSE	Medium	IsMasterProtein	B2R4N3	cDNA, FLJ92155, highly similar to Homo sapiens ubiquitin-like 5 (UBL5), mRNA OS=Homo sapiens PE=2 SV=1	0.031	0.884	8.21918	1	2	1	1	73	8.5	7.28	Not Found	Not Found	High	Not Found									0.585	0	0	1	19	1
FALSE	High	IsMasterProtein	B2R4U3	cDNA, FLJ92217, highly similar to Homo sapiens ubiquitin-conjugating enzyme E2C (UBE2C), mRNA OS=Homo sapiens PE=2 SV=1	0	37.048	35.1955	4	19	4	1	179	19.6	7.37	Peak Found	Not Found	High	High	Acetyl [N-Term]	23.063	8.48794	195.756	8.5		191.5	200	1.424	0	20.19	3	358	4
FALSE	High	IsMasterProtein	B2R547	cDNA, FLJ92339 OS=Homo sapiens PE=2 SV=1	0.001	4.877	11.6071	1	4	1	1	112	13.2	9.99	Peak Found	Not Found	High	High		8.848	20.3091	179.691	20.3		179.7		0.468	0	5.14	1	0	1
FALSE	High	IsMasterProtein	B2R5I8	cDNA, FLJ92490, highly similar to Homo sapiens RAB32, member RAS oncogene family (RAB32), mRNA OS=Homo sapiens PE=2 SV=1	0	52.815	15.5556	2	20	2	1	225	24.9	6.68	High	High	High	High	Acetyl [N-Term]	1.852	70.1242	129.876	69.6	70.7	130.4	129.3	1.371	0	15.83	1	740	2
FALSE	High	IsMasterProtein	B2R5R5	cDNA, FLJ92583, highly similar to Homo sapiens glycogenin (GYG), mRNA OS=Homo sapiens PE=2 SV=1	0	15.791	7.71429	2	5	2	1	350	39.3	5.53	High	High	Peak Found	Peak Found	Acetyl [N-Term]	1.19	91.3226	108.677	92.3	90.3	107.7	109.7	0.54	0	0	1	103	2
FALSE	High	IsMasterProtein	B2R5S3	cDNA, FLJ92597, highly similar to Homo sapiens NFS1 nitrogen fixation 1 (S. cerevisiae) (NFS1), mRNA OS=Homo sapiens PE=2 SV=1	0	33.614	9.40919	3	14	3	1	457	50.2	8.31	Peak Found	High	High	High		1.435	82.146	117.854	97	67.3	103	132.7	0.557	0	16.08	3	261	3
FALSE	High	IsMasterProtein	B2R5T2	cDNA, FLJ92608, highly similar to Homo sapiens aldehyde dehydrogenase 1 family, member A3 (ALDH1A3), mRNA OS=Homo sapiens PE=2 SV=1	0	69.781	18.9453	8	38	7	1	512	56.1	7.25	High	High	High	High	Acetyl [N-Term]	1.065	96.8652	103.135	94.9	98.8	105.1	101.2	1.326	0	40.68	7	719	8
FALSE	High	IsMasterProtein	B2R5U1	cDNA, FLJ92620, highly similar to Homo sapiens staphylococcal nuclease domain containing 1 (SND1),mRNA OS=Homo sapiens PE=2 SV=1	0	463.579	42.2599	26	305	15	1	885	99.6	6.96	High	High	High	High		1.374	84.2297	115.77	84.1	84.4	115.9	115.6	10.69	18	400.45	25	6874	26
FALSE	High	IsMasterProtein	B2R5U7	cDNA, FLJ92633, highly similar to Homo sapiens CCAAT-box-binding transcription factor (CBF2), mRNA OS=Homo sapiens PE=2 SV=1	0	210.839	21.2425	18	124	1	1	998	114.1	5.36	High	High	High	High		1.658	75.2429	124.757	73.8	76.7	126.2	123.3	2.981	0	171.86	18	2321	18
FALSE	High	IsMasterProtein	B2R5W6	cDNA, FLJ92661, highly similar to Homo sapiens microtubule-associated protein, RP/EB family, member 3 (MAPRE3), mRNA OS=Homo sapiens PE=2 SV=1	0	25.425	26.3345	6	20	1	1	281	32	5.43	Not Found	Not Found	Not Found	Not Found	Acetyl [N-Term]	1.51	79.6739	120.326	79.7		120.3		1.448	1	17.41	5	359	6
FALSE	High	IsMasterProtein	B2R5Y4	cDNA, FLJ92684, highly similar to Homo sapiens IK cytokine, down-regulator of HLA II (IK), mRNA OS=Homo sapiens PE=2 SV=1	0	32.368	12.2083	4	16	4	1	557	65.6	6.64	Peak Found	High	High	High		10.077	18.0549	181.945	20.8	15.3	179.2	184.7	0.468	0	23.44	4	319	4
FALSE	High	IsMasterProtein	B2R636	cDNA, FLJ92762, highly similar to Homo sapiens ubiquitin specific protease 1 (USP1), mRNA OS=Homo sapiens PE=2 SV=1	0.001	3.693	2.03822	1	2	1	1	785	88.2	5.38	Not Found	Not Found	High	Not Found		100		200			200		0.048	0	0	1	20	1
FALSE	High	IsMasterProtein	B2R643	cDNA, FLJ92777, highly similar to Homo sapiens myosin IA (MYO1A), mRNA OS=Homo sapiens PE=2 SV=1	0	21.508	2.58869	2	19	1	1	1043	118.3	9.31	Not Found	Peak Found	High	High		6.223	29.7485	185.126		29.7	200	170.3	0.098	0	30.64	2	472	2
FALSE	High	IsMasterProtein	B2R659	cDNA, FLJ92803, highly similar to Homo sapiens hydroxysteroid (17-beta) dehydrogenase 4 (HSD17B4), mRNA OS=Homo sapiens PE=2 SV=1	0	209.431	30.0272	16	90	16	1	736	79.6	8.9	High	High	High	High		1.522	79.2981	120.702	80.1	78.5	119.9	121.5	3.108	0	139.26	16	2349	16
FALSE	High	IsMasterProtein	B2R665	cDNA, FLJ92810, highly similar to Homo sapiens protein phosphatase 1G (formerly 2C), magnesium-dependent, gamma isoform (PPM1G), mRNA OS=Homo sapiens PE=2 SV=1	0	389.188	35.7143	14	193	14	1	546	59.2	4.36	High	High	High	High		1.5	80.003	119.997	79.9	80.1	120.1	119.9	39.471	0	277.5	14	5053	14
FALSE	High	IsMasterProtein	B2R679	cDNA, FLJ92825, highly similar to Homo sapiens SAR1a gene homolog 1 (S. cerevisiae) (SARA1), mRNA OS=Homo sapiens PE=2 SV=1	0	74.889	33.3333	4	52	3	1	198	22.3	7.03	High	High	High	High		1.543	78.6587	121.341	78.6	78.7	121.4	121.3	7.254	1	65.13	4	1275	4
FALSE	High	IsMasterProtein	B2R6A9	cDNA, FLJ92868, highly similar to Homo sapiens HIRA interacting protein 3 (HIRIP3), mRNA OS=Homo sapiens PE=2 SV=1	0	12.134	4.4964	2	6	2	1	556	61.8	8.66	High	High	Peak Found	High		5.131	32.6214	167.379	33.9	31.4	166.1	168.6	0.145	0	5.96	2	68	2
FALSE	High	IsMasterProtein	B2R6D0	cDNA, FLJ92896, highly similar to Homo sapiens proteasome (prosome, macropain) 26S subunit, non-ATPase, 1 (PSMD1), mRNA OS=Homo sapiens PE=2 SV=1	0	299.511	31.6894	22	185	1	1	953	105.8	5.39	High	High	High	High	Acetyl [N-Term]	1.368	84.4715	115.529	77	91.9	123	108.1	5.861	0	252.65	22	3417	22
FALSE	High	IsMasterProtein	B2R6E2	cDNA, FLJ92910, highly similar to Homo sapiens programmed cell death 4 (neoplastic transformation inhibitor) (PDCD4), transcript variant 1, mRNA OS=Homo sapiens PE=2 SV=1	0	42.74	17.9104	5	18	5	1	469	51.6	5.25	Not Found	Peak Found	High	High		8.592	21.9983	189.001		22	200	178	0.532	0	27.42	5	463	5
FALSE	High	IsMasterProtein	B2R6F9	cDNA, FLJ92932, highly similar to Homo sapiens serine/threonine kinase 38 (STK38), mRNA OS=Homo sapiens PE=2 SV=1	0.002	3.466	2.15054	1	2	1	1	465	54.2	7.15	Peak Found	Not Found	High	Not Found		1.914	68.6302	131.37	68.6		131.4		0.089	0	1.82	1	32	1
FALSE	High	IsMasterProtein	B2R6H7	cDNA, FLJ92955, highly similar to Homo sapiens transportin-SR (TRN-SR), mRNA OS=Homo sapiens PE=2 SV=1	0	212.597	25.2438	14	96	14	1	923	104.2	5.57	High	High	High	High		1.362	84.6733	115.327	85.4	83.9	114.6	116.1	3.095	0	130.43	14	1966	14
FALSE	High	IsMasterProtein	B2R6J3	cDNA, FLJ92974, highly similar to Homo sapiens methylmalonic aciduria (cobalamin deficiency) type B(MMAB), mRNA OS=Homo sapiens PE=1 SV=1	0	25.933	13.2	2	6	2	1	250	27.3	8.6	High	Peak Found	High	High		1.244	89.116	110.884	87.4	90.8	112.6	109.2	0.585	0	8.11	2	209	2
FALSE	High	IsMasterProtein	B2R6K0	cDNA, FLJ92988, highly similar to Homo sapiens mutL homolog 1, colon cancer, nonpolyposis type 2 (E. coli) (MLH1), mRNA OS=Homo sapiens PE=2 SV=1	0	26.07	9.65608	4	13	4	1	756	84.5	5.72	High	High	High	High		1.999	66.6778	133.322	59.7	73.6	140.3	126.4	0.253	0	10.97	4	170	3
FALSE	High	IsMasterProtein	B2R6K1	cDNA, FLJ92992, highly similar to Homo sapiens methylmalonyl Coenzyme A mutase (MUT), nuclear gene encoding mitochondrial protein, mRNA OS=Homo sapiens PE=2 SV=1	0	7.571	3.2	2	6	2	1	750	83	7.06	High	High	High	Peak Found		3.131	48.4101	151.59	53.4	43.4	146.6	156.6	0.119	0	4.65	2	63	2
FALSE	High	IsMasterProtein	B2R6K4	cDNA, FLJ92996, highly similar to Homo sapiens guanine nucleotide binding protein (G protein), beta polypeptide 1 (GNB1), mRNA OS=Homo sapiens PE=2 SV=1	0	146.486	52.3529	12	59	9	1	340	37.3	6.18	High	High	High	High	Acetyl [N-Term]	2.969	50.3928	149.607	49.5	51.3	150.5	148.7	7.66	3	84.65	10	2046	12
FALSE	High	IsMasterProtein	B2R6N6	cDNA, FLJ93036, highly similar to Homo sapiens tyrosine 3-monooxygenase/tryptophan 5-monooxygenaseactivation protein, eta polypeptide (YWHAH), mRNA OS=Homo sapiens PE=2 SV=1	0	95.025	34.5528	6	82	1	1	246	28.1	4.93	High	High	Peak Found	Peak Found		1.17	92.1641	107.836	99	85.3	101	114.7	7.799	0	103.67	6	1812	6
FALSE	High	IsMasterProtein	B2R6S4	cDNA, FLJ93089, highly similar to Homo sapiens NCK adaptor protein 1 (NCK1), mRNA OS=Homo sapiens PE=2 SV=1	0	12.381	8.22281	2	6	2	1	377	42.9	6.47	Peak Found	Peak Found	High	High	Acetyl [N-Term]	3.193	47.697	152.303	55.1	40.3	144.9	159.7	0.222	0	6.01	1	162	2
FALSE	High	IsMasterProtein	B2R6S9	cDNA, FLJ93097, highly similar to Homo sapiens low density lipoprotein receptor-related protein associated protein 1 (LRPAP1), mRNA OS=Homo sapiens PE=2 SV=1	0	76.345	28.2913	9	35	9	1	357	41.5	8.92	High	High	High	High		4.053	39.5797	160.42	45	34.2	155	165.8	2.311	0	47.47	9	688	8
FALSE	High	IsMasterProtein	B2R6U8	cDNA, FLJ93125, highly similar to Homo sapiens cleavage and polyadenylation specific factor 5, 25 kDa(CPSF5), mRNA OS=Homo sapiens PE=2 SV=1	0	65.181	19.8238	5	44	5	1	227	26.2	8.82	High	High	High	High		1.522	79.2942	120.706	79.3	79.3	120.7	120.7	3.217	0	55.48	5	870	5
FALSE	High	IsMasterProtein	B2R6V2	cDNA, FLJ93132, highly similar to Homo sapiens CDC7 cell division cycle 7 (S. cerevisiae) (CDC7), mRNA OS=Homo sapiens PE=2 SV=1	0	7.025	3.13589	1	6	1	1	574	63.8	8.81	Peak Found	Peak Found	High	High		24.052	7.98332	192.017	3.5	12.4	196.5	187.6	0.129	0	5.08	1	44	1
FALSE	High	IsMasterProtein	B2RE59	cDNA, FLJ93148, highly similar to Homo sapiens RCD1 required for cell differentiation1 homolog (S. pombe) (RQCD1), mRNA OS=Homo sapiens PE=2 SV=1	0	46.09	32.7759	7	20	7	1	299	33.6	8.03	High	High	High	High	Acetyl [N-Term]	1.38	84.0457	115.954	87.4	80.7	112.6	119.3	1.404	0	22.96	7	321	7
FALSE	High	IsMasterProtein	B2R6W9	cDNA, FLJ93157, highly similar to Homo sapiens SH3KBP1 binding protein 1 (SHKBP1), mRNA OS=Homo sapiens PE=2 SV=1	0	34.934	14.5686	5	18	4	1	707	76.3	8.28	Not Found	Peak Found	High	High		100	1.51652	199.242		1.5	200	198.5	0.354	1	22.64	5	463	5
FALSE	High	IsMasterProtein	B2R6X5	cDNA, FLJ93166, highly similar to Homo sapiens heat shock 70kDa protein 6 (HSP70B') (HSPA6), mRNA OS=Homo sapiens PE=2 SV=1	0	149.405	23.1726	12	184	1	1	643	70.9	6.24	Peak Found	Peak Found	High	High		1.315	86.4046	113.595	82.9	90	117.1	110	4.223	0	201.36	12	3536	12
FALSE	High	IsMasterProtein	B2R6Z3	cDNA, FLJ93192, highly similar to Homo sapiens serine/threonine kinase 6 (STK6), mRNA OS=Homo sapiens PE=2 SV=1	0	55.158	33.7469	9	22	1	1	403	45.8	9.39	Not Found	Not Found	High	Not Found		100		200			200		1.371	0	31.86	9	371	9
FALSE	High	IsMasterProtein	B2R713	cDNA, FLJ93224 OS=Homo sapiens PE=2 SV=1	0	57.849	12.824	5	24	5	1	733	81.7	7.97	High	High	High	High		1.676	74.7426	125.257	75.7	73.8	124.3	126.2	0.409	0	37.2	5	655	5
FALSE	High	IsMasterProtein	B2R728	cDNA, FLJ93255, highly similar to Homo sapiens solute carrier family 7 (cationic amino acidtransporter, y+ system), member 1 (SLC7A1), mRNA OS=Homo sapiens PE=2 SV=1	0	5.832	3.02067	1	2	1	1	629	67.6	5.43	Not Found	Not Found	High	Not Found									0.093	0	2.52	1	38	1
FALSE	High	IsMasterProtein	B2R739	cDNA, FLJ93269, highly similar to Homo sapiens mitochondrial ribosomal protein L15 (MRPL15), nuclear gene encoding mitochondrial protein, mRNA OS=Homo sapiens PE=2 SV=1	0	85.395	30.0676	7	56	7	1	296	33.4	10.01	High	High	High	High		1.213	90.3872	109.613	87.3	93.5	112.7	106.5	5.158	0	64.28	7	937	7
FALSE	High	IsMasterProtein	B2R749	cDNA, FLJ93285, highly similar to Homo sapiens cell division cycle associated 3 (CDCA3), mRNA OS=Homo sapiens PE=2 SV=1	0	37.871	30.2239	5	16	5	1	268	29	6.43	High	High	High	High		6.654	26.1311	173.869	28.9	23.4	171.1	176.6	1.254	0	19.77	5	285	5
FALSE	High	IsMasterProtein	B2R758	cDNA, FLJ93295, highly similar to Homo sapiens glucosaminyl (N-acetyl) transferase 3, mucin type (GCNT3), mRNA OS=Homo sapiens PE=2 SV=1	0	9.445	3.88128	1	4	1	1	438	50.9	8.25	Not Found	Not Found	High	High		100		200			200	200	0.075	0	5.93	1	122	1
FALSE	High	IsMasterProtein	B2R761	cDNA, FLJ93299, highly similar to Homo sapiens sterol carrier protein 2 (SCP2), mRNA OS=Homo sapiens PE=2 SV=1	0	45.781	13.7112	8	41	8	1	547	59	7.05	High	High	High	High	Acetyl [N-Term]	1.698	74.1237	125.876	73.5	74.7	126.5	125.3	1.297	0	42.65	7	455	8
FALSE	High	IsMasterProtein	B2R774	cDNA, FLJ93313, highly similar to Homo sapiens lectin, mannose-binding, 1 (LMAN1), mRNA OS=Homo sapiens PE=2 SV=1	0	66.246	15.6863	5	23	5	1	510	57.5	6.77	High	High	High	High		1.486	80.4438	119.556	89.8	71.1	110.2	128.9	1.043	0	28.3	5	374	5
FALSE	High	IsMasterProtein	B2R791	cDNA, FLJ93335, highly similar to Homo sapiens PRP3 pre-mRNA processing factor 3 homolog (yeast) (PRPF3), mRNA OS=Homo sapiens PE=2 SV=1	0	43.534	11.713	6	25	6	1	683	77.5	9.5	High	High	High	High		1.568	77.8908	122.109	80.4	75.4	119.6	124.6	0.701	0	26.5	6	391	6
FALSE	High	IsMasterProtein	B2R7B1	cDNA, FLJ93361, highly similar to Homo sapiens membrane interacting protein of RGS16 (MIR16), mRNA OS=Homo sapiens PE=2 SV=1	0	8.556	10.2719	3	5	3	1	331	37.7	6.71	Peak Found	High	High	Peak Found		2.102	64.4782	135.522	64.5		135.5		0.413	0	4.97	3	74	2
FALSE	High	IsMasterProtein	B2R7B5	cDNA, FLJ93365, highly similar to Homo sapiens KH domain containing, RNA binding, signal transduction associated 1 (KHDRBS1), mRNA OS=Homo sapiens PE=2 SV=1	0	63.585	17.6072	5	58	5	1	443	48.2	8.66	High	High	High	High		1.437	82.0838	117.916	85.5	78.6	114.5	121.4	1.873	0	84.9	5	890	5
FALSE	High	IsMasterProtein	B2R7C2	cDNA, FLJ93375, highly similar to Homo sapiens ZW10, kinetochore associated, homolog (Drosophila) (ZW10), mRNA OS=Homo sapiens PE=2 SV=1	0	98.8	16.9448	9	56	9	1	779	88.8	6.27	High	High	High	High		1.248	88.9711	111.029	91.5	86.4	108.5	113.6	1.33	0	68.23	9	932	9
FALSE	High	IsMasterProtein	B2R7D2	cDNA, FLJ93389, highly similar to Homo sapiens multiple inositol polyphosphate histidine phosphatase, 1 (MINPP1), mRNA OS=Homo sapiens PE=2 SV=1	0	49.667	13.7577	5	22	5	1	487	55.1	7.97	High	High	High	High		2.252	61.4942	138.506	62.5	60.5	137.5	139.5	0.778	0	27.37	5	531	5
FALSE	High	IsMasterProtein	B2R7G4	cDNA, FLJ93435, highly similar to Homo sapiens general transcription factor IIH, polypeptide 1 (62kD subunit) (GTF2H1), mRNA OS=Homo sapiens PE=2 SV=1	0	11.416	4.56204	2	8	2	1	548	62	8.84	High	High	Peak Found	High		0.809	110.546	89.4536	73.4	147.7	126.6	52.3	0.15	0	9.63	2	202	2
FALSE	High	IsMasterProtein	B2R7G6	cDNA, FLJ93437, highly similar to Homo sapiens histidyl-tRNA synthetase-like (HARSL), mRNA OS=Homo sapiens PE=2 SV=1	0	33.759	13.834	7	38	4	1	506	56.9	8.02	High	High	High	High		1.389	83.7048	116.295	91.2	76.2	108.8	123.8	0.968	0	41.75	7	381	7
FALSE	High	IsMasterProtein	B2R7M3	cDNA, FLJ93510, highly similar to Homo sapiens JTV1 gene (JTV1), mRNA OS=Homo sapiens PE=2 SV=1	0	54.559	17.1875	3	28	3	1	320	35.4	8.41	High	High	High	High		1.682	74.5605	125.439	75.3	73.9	124.7	126.1	1.154	0	32.4	3	693	3
FALSE	High	IsMasterProtein	B2R7T6	cDNA, FLJ93596, highly similar to Homo sapiens sulfide quinone reductase-like (yeast) (SQRDL), mRNA OS=Homo sapiens PE=2 SV=1	0	258.046	39.1111	16	196	16	1	450	49.9	9.06	High	High	High	High		1.068	96.7305	103.27	96.8	96.7	103.2	103.3	16.191	0	260.87	16	3477	16
FALSE	High	IsMasterProtein	B2R7T8	cDNA, FLJ93598, highly similar to Homo sapiens capping protein (actin filament) muscle Z-line, beta (CAPZB), mRNA OS=Homo sapiens PE=2 SV=1	0	168.581	54.7794	15	98	15	1	272	30.6	6	High	High	High	High	Acetyl [N-Term]	1.266	88.2466	111.753	89	87.5	111	112.5	41.813	0	122.88	14	1913	15
FALSE	High	IsMasterProtein	B2R7U4	cDNA, FLJ93605, highly similar to Homo sapiens heme oxygenase (decycling) 1 (HMOX1), mRNA OS=Homo sapiens PE=2 SV=1	0	59.376	27.4306	5	41	5	1	288	32.8	8.25	Peak Found	Peak Found	High	High		7.258	24.2189	175.781	23.1	25.4	176.9	174.6	2.594	0	48.83	5	626	5
FALSE	High	IsMasterProtein	B2R7X3	cDNA, FLJ93645, highly similar to Homo sapiens chromatin assembly factor 1, subunit B (p60) (CHAF1B),mRNA OS=Homo sapiens PE=2 SV=1	0	21.935	8.58676	3	5	3	1	559	61.5	7.49	Not Found	Peak Found	Not Found	High		2.468	57.6639	142.336		57.7		142.3	0.241	0	9.62	3	129	2
FALSE	High	IsMasterProtein	B2R7X4	cDNA, FLJ93646, highly similar to Homo sapiens growth factor receptor-bound protein 14 (GRB14), mRNA OS=Homo sapiens PE=2 SV=1	0	6.119	2.40741	1	2	1	1	540	60.8	8.27	Not Found	Not Found	Not Found	Not Found	Acetyl [N-Term]								0.083	0			77	1
FALSE	High	IsMasterProtein	B2R802	cDNA, FLJ93681, highly similar to Homo sapiens small nuclear ribonucleoprotein polypeptide A (SNRPA), mRNA OS=Homo sapiens PE=2 SV=1	0	40.165	9.57447	2	19	1	1	282	31.3	9.86	High	High	Peak Found	Peak Found	Acetyl [N-Term]	1.186	91.5037	108.496	91.6	91.4	108.4	108.6	3.642	1	5.87	1	333	2
FALSE	High	IsMasterProtein	B2R823	cDNA, FLJ93703, highly similar to Homo sapiens putatative 28 kDa protein (LOC56902), mRNA OS=Homo sapiens PE=2 SV=1	0	63.423	24.6032	6	28	6	1	252	27.9	9.73	High	High	High	High		4.759	34.7254	165.275	36	33.4	164	166.6	2.384	0	45.29	6	713	6
FALSE	High	IsMasterProtein	B2R848	cDNA, FLJ93738, highly similar to Homo sapiens thymine-DNA glycosylase (TDG), mRNA OS=Homo sapiens PE=2 SV=1	0.002	3.243	2.43902	1	2	1	1	410	46	6.99	Not Found	Not Found	Not Found	High		100		200				200	0.129	0	0	1	0	1
FALSE	High	IsMasterProtein	B2R880	cDNA, FLJ93778, highly similar to Homo sapiens CD38 antigen (p45) (CD38), mRNA OS=Homo sapiens PE=2 SV=1	0	9.517	5.33333	1	1	1	1	300	34.3	7.47	Not Found	Not Found	Not Found	Not Found									0.11	0			50	1
FALSE	High	IsMasterProtein	B2R892	cDNA, FLJ93793, highly similar to Homo sapiens creatine kinase, muscle (CKM), mRNA OS=Homo sapiens PE=2 SV=1	0.005	2.727	3.67454	1	1	1	1	381	43	7.44	Not Found	Not Found	Not Found	Not Found									0.093	0	0	1
FALSE	Medium	IsMasterProtein	B2R8J5	cDNA, FLJ93928, highly similar to Homo sapiens PDZ domain containing ring finger 1 (PDZRN1), mRNA OS=Homo sapiens PE=2 SV=1	0.011	1.948	2.46377	1	2	1	1	690	76	6.7	Not Found	Peak Found	Not Found	High		1.447	81.7472	118.253		81.7		118.3	0.075	0	0	1	0	1
FALSE	High	IsMasterProtein	B2R8N1	cDNA, FLJ93976, highly similar to Homo sapiens COP9 homolog (COP9), mRNA OS=Homo sapiens PE=2 SV=1	0	90.465	30.1435	4	42	4	1	209	23.2	5.38	High	High	High	High		1.512	79.6336	120.366	80.6	78.6	119.4	121.4	14.849	0	56.83	4	867	4
FALSE	Medium	IsMasterProtein	B2R8N8	cDNA, FLJ93988, highly similar to Homo sapiens baculoviral IAP repeat-containing 2 (BIRC2), mRNA OS=Homo sapiens PE=2 SV=1	0.015	1.642	1.45631	1	2	1	1	618	69.9	6.81	Peak Found	Not Found	High	Not Found		3.725	42.3245	157.676	42.3		157.7		0.059	0	0	1	15	1
FALSE	High	IsMasterProtein	B2R8X4	cDNA, FLJ94105, highly similar to Homo sapiens GA binding protein transcription factor, alpha subunit 60kDa (GABPA), mRNA OS=Homo sapiens PE=2 SV=1	0	18.234	3.30396	1	12	1	1	454	51.2	4.97	High	High	High	High		2.497	57.1924	142.808	59.9	54.5	140.1	145.5	0.318	0	9.39	1	258	1
FALSE	Medium	IsMasterProtein	B2R921	cDNA, FLJ94171, highly similar to Homo sapiens solute carrier family 25 (mitochondrial carrier; ornithine transporter) member 15 (SLC25A15), nuclear gene encoding mitochondrial protein, mRNA OS=Homo sapiens PE=2 SV=1	0.016	1.532	2.32558	1	2	1	1	301	32.8	9.29	Not Found	Peak Found	Not Found	High		1.949	67.8298	132.17		67.8		132.2	0.129	0	0	1	0	1
FALSE	High	IsMasterProtein	B2R960	cDNA, FLJ94230, highly similar to Homo sapiens thioredoxin-like 1 (TXNL1), mRNA OS=Homo sapiens PE=2 SV=1	0	229.955	44.9827	10	123	10	1	289	32.2	4.96	High	High	High	High		1.405	83.1476	116.852	82.7	83.6	117.3	116.4	63.938	0	169.86	9	3290	10
FALSE	High	IsMasterProtein	B2R983	cDNA, FLJ94267, highly similar to Homo sapiens glutathione S-transferase omega 1 (GSTO1), mRNA OS=Homo sapiens PE=2 SV=1	0	127.799	34.4398	10	123	10	1	241	27.5	6.6	High	High	High	High		1.175	91.9643	108.036	91.2	92.8	108.8	107.2	41.17	0	115.33	10	1756	10
FALSE	High	IsMasterProtein	B2R9D9	cDNA, FLJ94347 OS=Homo sapiens PE=2 SV=1	0	24.893	16.9492	3	12	3	1	354	38.5	7.21	Peak Found	Peak Found	High	High		2.163	63.2376	136.762	55.7	70.8	144.3	129.2	0.413	0	15.84	3	283	3
FALSE	Medium	IsMasterProtein	B2R9F5	cDNA, FLJ94365 OS=Homo sapiens PE=2 SV=1	0.022	1.218	2.64901	1	2	1	1	755	86.6	9.1	Peak Found	Not Found	High	Not Found		1.049	97.6264	102.374	97.6		102.4		0.049	0	1.75	1	16	1
FALSE	High	IsMasterProtein	B2R9K5	cDNA, FLJ94435 OS=Homo sapiens PE=2 SV=1	0	20.195	11.9691	2	10	2	1	259	29.9	10.17	Not Found	Not Found	High	High		100		200			200	200	0.468	0	13.5	2	210	2
FALSE	High	IsMasterProtein	B2R9K8	cDNA, FLJ94440, highly similar to Homo sapiens chaperonin containing TCP1, subunit 6A (zeta 1)(CCT6A), mRNA OS=Homo sapiens PE=2 SV=1	0	355.249	43.3145	17	220	17	1	531	57.9	6.8	High	High	High	High		1.29	87.3425	112.658	88.5	86.2	111.5	113.8	37.075	0	315.36	17	4640	17
FALSE	High	IsMasterProtein	B2R9S4	cDNA, FLJ94534, highly similar to Homo sapiens capping protein (actin filament), gelsolin-like(CAPG), mRNA OS=Homo sapiens PE=2 SV=1	0	18.473	9.1954	3	16	3	1	348	38.5	6.37	High	High	High	High		1.161	92.5343	107.466	91.9	93.2	108.1	106.8	0.778	0	16.38	3	327	3
FALSE	High	IsMasterProtein	B2R9T9	cDNA, FLJ94551 OS=Homo sapiens PE=2 SV=1	0	9.893	4.93827	1	8	1	1	243	26.2	10.67	Not Found	Not Found	High	High		100		200			200	200	0.52	0	5.2	1	146	1
FALSE	High	IsMasterProtein	B2R9X3	cDNA, FLJ94599, highly similar to Homo sapiens GDP-mannose 4,6-dehydratase (GMDS), mRNA OS=Homo sapiens PE=2 SV=1	0	32.956	21.5054	5	15	5	1	372	41.8	7.12	High	High	High	High		1.4	83.3252	116.675	91.5	75.2	108.5	124.8	0.61	0	22.04	5	262	4
FALSE	High	IsMasterProtein	B2R9Y2	cDNA, FLJ94609 OS=Homo sapiens PE=2 SV=1	0	19.084	6.09319	4	14	4	1	558	66.3	8.97	Peak Found	Peak Found	High	High		6.156	27.9493	172.051	26.7	29.2	173.3	170.8	0.45	0	15.22	4	133	4
FALSE	High	IsMasterProtein	B2RA03	cDNA, FLJ94640, highly similar to Homo sapiens keratin 18 (KRT18), mRNA OS=Homo sapiens PE=2 SV=1	0	801.412	53.9535	21	618	20	1	430	48	5.38	High	High	High	High		0.965	101.798	98.2017	102.3	101.3	97.7	98.7	1560.52	1	712.76	21	14673	21
FALSE	High	IsMasterProtein	B2RA50	cDNA, FLJ94698, highly similar to Homo sapiens trafficking protein particle complex 1 (TRAPPC1),mRNA OS=Homo sapiens PE=2 SV=1	0	9.399	11.0345	1	4	1	1	145	16.8	9.14	Peak Found	Peak Found	High	High		2.008	66.4927	133.507	61.6	71.3	138.4	128.7	0.212	0	6.74	1	206	1
FALSE	High	IsMasterProtein	B2RAA8	cDNA, FLJ94802 OS=Homo sapiens PE=2 SV=1	0	18.112	15.9574	3	10	3	1	282	31.1	5.11	Peak Found	Not Found	High	High		32.191	6.11796	196.941	6.1		193.9	200	0.585	0	13.31	3	144	3
FALSE	High	IsMasterProtein	B2RAD8	cDNA, FLJ94852, highly similar to Homo sapiens eukaryotic translation initiation factor 2C, 1 (EIF2C1), mRNA OS=Homo sapiens PE=2 SV=1	0	31.843	4.2007	2	14	1	1	857	97.2	9.16	Not Found	High	Not Found	Peak Found		0.95	102.579	97.4213		102.6		97.4	0.19	0	24.09	2	380	2
FALSE	Medium	IsMasterProtein	B2RE74	cDNA, FLJ94876, highly similar to Homo sapiens fructose-1,6-bisphosphatase 1 (FBP1), mRNA OS=Homo sapiens PE=2 SV=1	0.026	1.019	3.5503	1	2	1	1	338	36.8	6.68	Not Found	Not Found	High	Not Found		100		200			200		0.116	0	0	1	0	1
FALSE	High	IsMasterProtein	B2RAF3	cDNA, FLJ94877, highly similar to Homo sapiens placental protein 6 (PL6), mRNA OS=Homo sapiens PE=2 SV=1	0	12.137	16.2393	3	6	3	1	351	38.2	8.16	High	Not Found	Peak Found	High		1.152	92.9282	107.072	92.9		107.1		0.778	0	7.37	3	77	3
FALSE	High	IsMasterProtein	B2RAH7	cDNA, FLJ94921, highly similar to Homo sapiens prolyl endopeptidase (PREP), mRNA OS=Homo sapiens PE=2 SV=1	0	205.584	32.5352	15	84	15	1	710	80.7	5.86	High	High	High	High		1.38	84.0229	115.977	80.9	87.1	119.1	112.9	2.802	0	113.27	15	1671	15
FALSE	High	IsMasterProtein	B2RAI2	cDNA, FLJ94931, highly similar to Homo sapiens zinc finger protein 148 (pHZ-52) (ZNF148), mRNA OS=Homo sapiens PE=2 SV=1	0	6.016	2.14106	1	2	1	1	794	88.9	6.48	Not Found	Not Found	High	Not Found		100		200			200		0.056	0	3.32	1	73	1
FALSE	High	IsMasterProtein	B2RAK1	cDNA, FLJ94965, highly similar to Homo sapiens leucyl/cystinyl aminopeptidase (LNPEP), mRNA OS=Homo sapiens PE=2 SV=1	0	24.706	5.46341	4	14	4	1	1025	117.3	5.73	High	Peak Found	High	High		1.874	69.5917	130.408	67.7	71.5	132.3	128.5	0.224	0	16.94	4	220	4
FALSE	High	IsMasterProtein	B2RAL3	cDNA, FLJ94988, highly similar to Homo sapiens protein phosphatase 2 (formerly 2A), regulatory subunit B'', alpha (PPP2R3A), mRNA OS=Homo sapiens PE=2 SV=1	0	10.879	2.52174	2	4	2	1	1150	130.2	5.24	Peak Found	Not Found	High	High		2.787	60.8536	169.573	60.9		139.1	200	0.068	0	4.95	2	83	2
FALSE	High	IsMasterProtein	B2RAM2	cDNA, FLJ94999, highly similar to Homo sapiens calpain 7 (CAPN7), mRNA OS=Homo sapiens PE=2 SV=1	0	8.498	3.44403	2	8	2	1	813	92.6	7.65	Peak Found	Peak Found	High	High		5.342	31.5334	168.467	18.7	44.4	181.3	155.6	0.091	0	8.11	2	107	2
FALSE	High	IsMasterProtein	B2RAN0	cDNA, FLJ95010, highly similar to Homo sapiens Bloom syndrome (BLM), mRNA OS=Homo sapiens PE=2 SV=1	0	51.06	9.31546	9	24	9	1	1417	158.9	7.56	Not Found	Peak Found	High	High	Acetyl [N-Term]	25.78	7.61023	196.195		7.6	200	192.4	0.266	0	26.04	8	385	9
FALSE	High	IsMasterProtein	B2RAQ8	cDNA, FLJ95058, highly similar to Homo sapiens carnitine palmitoyltransferase 1A (liver) (CPT1A),nuclear gene encoding mitochondrial protein, mRNA OS=Homo sapiens PE=2 SV=1	0	46.118	9.31436	5	22	5	1	773	88.3	8.59	High	High	High	High		1.058	97.1591	102.841	104.7	89.6	95.3	110.4	0.42	0	32.2	5	488	5
FALSE	High	IsMasterProtein	B2RAR2	cDNA, FLJ95064, highly similar to Homo sapiens nin one binding protein (NOB1P), mRNA OS=Homo sapiens PE=2 SV=1	0	99.716	22.3301	6	34	6	1	412	46.6	7.18	High	High	High	High		5.508	30.7293	169.271	31.2	30.2	168.8	169.8	1.754	0	49.67	5	1239	6
FALSE	High	IsMasterProtein	B2RAW0	cDNA, FLJ95154, highly similar to Homo sapiens disabled homolog 2, mitogen-responsive phosphoprotein (Drosophila) (DAB2), mRNA OS=Homo sapiens PE=2 SV=1	0	12.135	1.68831	1	6	1	1	770	82.4	5.53	High	Not Found	High	High		3.544	49.4578	175.271	49.5		150.5	200	0.136	0	7.16	1	99	1
FALSE	High	IsMasterProtein	B2RAX1	cDNA, FLJ95169 OS=Homo sapiens PE=2 SV=1	0	12.626	3.39734	2	6	1	1	677	77.3	6.16	Peak Found	Not Found	High	Not Found		2.631	55.0842	144.916	55.1		144.9		0.212	0	6.54	2	93	2
FALSE	High	IsMasterProtein	B2RAY1	cDNA, FLJ95184, highly similar to Homo sapiens signal transducing adaptor molecule (SH3 domain and ITAM motif) 1 (STAM), mRNA OS=Homo sapiens PE=2 SV=1	0	66.218	17.5926	6	34	5	1	540	59.1	4.84	High	High	High	High		1.124	94.1573	105.843	103.7	84.6	96.3	115.4	1.848	1	40.56	5	548	6
FALSE	High	IsMasterProtein	B2RAZ4	cDNA, FLJ95208, highly similar to Homo sapiens PYD and CARD domain containing (PYCARD), transcript variant 1, mRNA OS=Homo sapiens PE=2 SV=1	0	53.4	20.5128	4	24	4	1	195	21.6	5.64	High	High	High	High		1.408	83.0463	116.954	82	84.1	118	115.9	2.831	0	39.51	4	736	4
FALSE	High	IsMasterProtein	B2RB23	cDNA, FLJ95265, highly similar to Homo sapiens acetyl-Coenzyme A acyltransferase 2 (mitochondrial 3-oxoacyl-Coenzyme A thiolase) (ACAA2), nuclear gene encoding mitochondrial protein, mRNA OS=Homo sapiens PE=2 SV=1	0	312.526	46.5995	11	130	11	1	397	42	8.25	High	High	High	High		1.092	95.5884	104.412	95.4	95.8	104.6	104.2	26.213	0	195.7	11	3928	11
FALSE	High	IsMasterProtein	B2RB38	cDNA, FLJ95288, highly similar to Homo sapiens feline leukemia virus subgroup C cellular receptor (FLVCR), mRNA OS=Homo sapiens PE=2 SV=1	0	35.223	5.76577	2	10	2	1	555	59.9	5.97	High	High	High	Peak Found		4.11	39.1357	160.864	36.7	41.6	163.3	158.4	0.778	0	1.96	1	260	2
FALSE	High	IsMasterProtein	B2RB47	cDNA, FLJ95309, highly similar to Homo sapiens adenosine monophosphate deaminase 2 (isoform L)(AMPD2), mRNA OS=Homo sapiens PE=2 SV=1	0	30.349	4.43686	3	18	3	1	879	100.7	6.93	High	High	High	High		1.205	90.6979	109.302	99.4	82	100.6	118	0.259	0	18.61	3	342	3
FALSE	High	IsMasterProtein	B2RB52	cDNA, FLJ95314, highly similar to Homo sapiens transducin (beta)-like 2 (TBL2), transcript variant 1, mRNA OS=Homo sapiens PE=2 SV=1	0	42.002	14.7651	7	31	7	1	447	49.8	9.44	High	High	High	High		0.961	101.972	98.028	103.8	100.1	96.2	99.9	1.102	0	38.45	7	409	6
FALSE	High	IsMasterProtein	B2RB57	cDNA, FLJ95321, highly similar to Homo sapiens ATG7 autophagy related 7 homolog (S. cerevisiae) (ATG7), mRNA OS=Homo sapiens PE=2 SV=1	0	59.517	12.3755	7	44	7	1	703	77.9	6.24	High	High	High	High		1.246	89.0344	110.966	87.2	90.9	112.8	109.1	0.778	0	48.84	7	665	7
FALSE	High	IsMasterProtein	B2RB94	cDNA, FLJ95380, highly similar to Homo sapiens vacuolar protein sorting 41 (yeast) (VPS41), transcript variant 1, mRNA OS=Homo sapiens PE=2 SV=1	0	5.635	1.40515	1	2	1	1	854	98.5	5.9	Not Found	Peak Found	Not Found	High		4.996	33.3552	166.645		33.4		166.6	0.044	0	2.23	1	51	1
FALSE	High	IsMasterProtein	B2RB95	cDNA, FLJ95381, Homo sapiens tripartite motif-containing 16 (TRIM16), mRNA OS=Homo sapiens PE=2 SV=1	0	216.632	37.234	15	96	1	1	564	63.9	5.49	Not Found	Peak Found	Not Found	High		2.303	60.5542	139.446	60.2	60.9	139.8	139.1	7.111	14	140.79	15	2107	15
FALSE	High	IsMasterProtein	B2RBA0	cDNA, FLJ95388, highly similar to Homo sapiens step II splicing factor SLU7 (SLU7), mRNA OS=Homo sapiens PE=2 SV=1	0	15.474	5.2901	2	6	2	1	586	68.3	7.14	Not Found	Not Found	High	High	Acetyl [N-Term]								0.122	0	5.82	1	217	2
FALSE	High	IsMasterProtein	B2RBB2	cDNA, FLJ95416, highly similar to Homo sapiens phosphatidylinositol glycan, class S (PIGS), mRNA OS=Homo sapiens PE=2 SV=1	0	32.463	9.18919	3	8	3	1	555	61.6	6.49	Peak Found	High	High	High		1.613	76.5311	123.469	82.6	70.5	117.4	129.5	0.389	0	13.62	3	242	3
FALSE	High	IsMasterProtein	B2RBE0	cDNA, FLJ95462, highly similar to Homo sapiens fatty-acid-Coenzyme A ligase, long-chain 3 (FACL3),mRNA OS=Homo sapiens PE=2 SV=1	0	229.081	28.6111	16	146	14	1	720	80.3	8.46	High	High	High	High		2.106	64.3939	135.606	63.7	65.1	136.3	134.9	6.079	3	178.24	16	3014	16
FALSE	High	IsMasterProtein	B2RBH1	cDNA, FLJ95507, highly similar to Homo sapiens pleckstrin homology domain containing, family A (phosphoinositide binding specific) member 1 (PLEKHA1), mRNA OS=Homo sapiens PE=2 SV=1	0	10.946	5.69307	2	4	2	1	404	45.5	8.56	Not Found	Peak Found	Not Found	High		3.897	40.8444	159.156		40.8		159.2	0.172	0	5.07	2	76	2
FALSE	High	IsMasterProtein	B2RBH2	cDNA, FLJ95508, highly similar to Homo sapiens 5'-nucleotidase, ecto (CD73) (NT5E), mRNA OS=Homo sapiens PE=2 SV=1	0	32.395	12.1951	4	12	4	1	574	63.4	7.03	Peak Found	High	High	High		1.797	71.5136	128.486	73.6	69.4	126.4	130.6	0.389	0	16.1	4	231	4
FALSE	High	IsMasterProtein	B2RBI2	cDNA, FLJ95525, highly similar to Homo sapiens synapse associated protein 1, SAP47 homolog (Drosophila) (SYAP1), mRNA OS=Homo sapiens PE=2 SV=1	0	245.572	53.6932	19	148	19	1	352	39.9	4.53	High	High	High	High		1.987	66.9476	133.052	65.9	68	134.1	132	68.519	0	209.99	19	3305	19
FALSE	High	IsMasterProtein	B2RBI4	cDNA, FLJ95528, highly similar to Homo sapiens catenin (cadherin-associated protein), alpha-like 1 (CTNNAL1), mRNA OS=Homo sapiens PE=2 SV=1	0	12.466	4.08719	2	6	2	1	734	81.8	6.64	Not Found	Peak Found	High	High		37.571	5.25337	197.373		5.3	200	194.7	0.105	0	7.21	2	91	2
FALSE	High	IsMasterProtein	B2RBJ7	cDNA, FLJ95547, highly similar to Homo sapiens nuclear receptor coactivator 6 interacting protein (NCOA6IP), mRNA OS=Homo sapiens PE=2 SV=1	0	26.69	8.67526	4	22	4	1	853	96.5	4.94	Not Found	Peak Found	High	High		5.741	32.048	183.976		32	200	168	0.271	0	18.56	4	261	4
FALSE	High	IsMasterProtein	B2RBM8	cDNA, FLJ95596, highly similar to Homo sapiens activity-dependent neuroprotector (ADNP), mRNA OS=Homo sapiens PE=2 SV=1	0	65.804	11.9782	8	59	8	1	1102	123.5	7.42	High	High	High	High		2.091	64.6997	135.3	63	66.4	137	133.6	0.408	0	55.76	8	677	8
FALSE	High	IsMasterProtein	B2RBP3	cDNA, FLJ95615, highly similar to Homo sapiens ubiquitin-activating enzyme E1C (UBA3 homolog, yeast)(UBE1C), mRNA OS=Homo sapiens PE=2 SV=1	0	119.849	31.9654	10	64	10	1	463	51.8	5.45	High	High	High	High		1.035	98.267	101.733	97.5	99.1	102.5	100.9	3.394	0	97.3	10	1240	10
FALSE	High	IsMasterProtein	B2RBR9	cDNA, FLJ95650, highly similar to Homo sapiens karyopherin (importin) beta 1 (KPNB1), mRNA OS=Homo sapiens PE=2 SV=1	0	384.832	35.1598	23	353	23	1	876	97.1	4.78	High	High	High	High	Acetyl [N-Term]	1.369	84.4324	115.568	81.4	87.4	118.6	112.6	23.342	0	456.6	21	6937	22
FALSE	High	IsMasterProtein	B2RBU0	cDNA, FLJ95691, highly similar to Homo sapiens PRP18 pre-mRNA processing factor 18 homolog (yeast) (PRPF18), mRNA OS=Homo sapiens PE=2 SV=1	0	7.98	9.64912	2	4	2	1	342	39.8	8.38	Not Found	Not Found	High	High		100		200			200		0.245	0	4.54	2	53	2
FALSE	High	IsMasterProtein	B2RBX8	cDNA, FLJ95758, highly similar to Homo sapiens GCIP-interacting protein p29 (P29), mRNA OS=Homo sapiens PE=2 SV=1	0	64.542	27.1605	5	15	5	1	243	28.7	8.28	High	Not Found	High	High	Acetyl [N-Term]	27.546	7.13116	196.434	7.1		192.9	200	2.455	0	8.99	3	867	5
FALSE	High	IsMasterProtein	B2RC06	cDNA, FLJ95791, highly similar to Homo sapiens aurora kinase B (AURKB), mRNA OS=Homo sapiens PE=2 SV=1	0	20.683	11.6279	3	12	3	1	344	39.3	9.36	Not Found	Peak Found	High	High		37.6	5.24935	197.375		5.2	200	194.8	0.369	0	11.25	3	193	3
FALSE	High	IsMasterProtein	B2RC46	cDNA, FLJ95848 OS=Homo sapiens PE=2 SV=1	0	12.597	13.7168	1	1	1	1	226	25.3	5.59	Not Found	Not Found	Not Found	Not Found	Acetyl [N-Term]								0.194	0			109	1
FALSE	High	IsMasterProtein	B2RCC2	cDNA, FLJ95978, highly similar to Homo sapiens Y box binding protein 2 (YBX2), mRNA OS=Homo sapiens PE=2 SV=1	0	150.859	19.2308	5	175	1	1	364	38.5	10.8	Not Found	Not Found	Not Found	Not Found									17.957	0	231.91	4	3793	5
FALSE	High	IsMasterProtein	B2RCC7	cDNA, FLJ95989, highly similar to Homo sapiens six transmembrane epithelial antigen of the prostate 2 (STEAP2), mRNA OS=Homo sapiens PE=2 SV=1	0.002	3.428	4.69388	1	2	1	1	490	55.9	9.07	Not Found	Not Found	Not Found	High		100		200				200	0.08	0	3.01	1	30	1
FALSE	High	IsMasterProtein	B2RCD8	cDNA, FLJ96012, highly similar to Homo sapiens interferon regulatory factor 2 binding protein 1 (IRF2BP1), mRNA OS=Homo sapiens PE=2 SV=1	0	39.576	15.411	6	25	5	1	584	61.7	8.18	High	High	High	High		3.564	43.823	156.177	42.4	45.2	157.6	154.8	0.624	0	27.41	6	411	5
FALSE	High	IsMasterProtein	B2RCJ6	cDNA, FLJ96114, highly similar to Homo sapiens bromodomain and WD repeat domain containing 2 (BRWD2), mRNA OS=Homo sapiens PE=2 SV=1	0	112.345	15.0327	11	49	1	1	1224	136.7	6.92	Peak Found	High	High	High		1.272	88.0436	111.956	92.4	83.7	107.6	116.3	0.821	10	64.39	11	917	10
FALSE	High	IsMasterProtein	B2RCM2	cDNA, FLJ96156, highly similar to Homo sapiens leucyl-tRNA synthetase (LARS), mRNA OS=Homo sapiens PE=2 SV=1	0	307.255	25.5102	24	205	24	1	1176	134.4	7.2	High	High	High	High		1.2	90.9104	109.09	90.2	91.6	109.8	108.4	5.264	0	258.56	24	3306	24
FALSE	High	IsMasterProtein	B2RCM3	cDNA, FLJ96158, highly similar to Homo sapiens calpain 2, (m/II) large subunit (CAPN2), mRNA OS=Homo sapiens PE=2 SV=1	0	558.771	48.1429	24	303	24	1	700	80	5	High	High	High	High		1.181	91.7058	108.294	91.8	91.7	108.2	108.3	37.882	0	476.2	24	8715	24
FALSE	High	IsMasterProtein	B2RCM6	cDNA, FLJ96161 OS=Homo sapiens PE=2 SV=1	0	30.438	18.9723	3	22	3	1	253	28.2	9.54	High	High	High	High		0.711	116.912	83.0883	118.9	114.9	81.1	85.1	0.931	0	22.68	3	556	3
FALSE	High	IsMasterProtein	B2RCN8	cDNA, FLJ96179, highly similar to Homo sapiens glucocorticoid modulatory element binding protein 1 (GMEB1), transcript variant 1, mRNA OS=Homo sapiens PE=2 SV=1	0	11.447	3.31588	1	2	1	1	573	62.6	4.89	Not Found	Not Found	High	Not Found									0.11	0	3.16	1	110	1
FALSE	High	IsMasterProtein	B2RCX0	cDNA, FLJ96345, Homo sapiens SET translocation (myeloid leukemia-associated) (SET),mRNA OS=Homo sapiens PE=2 SV=1	0	197.012	30.6859	9	124	1	1	277	32.1	4.22	High	High	High	High		1.415	82.8081	117.192	83.6	82	116.4	118	145.78	0	147.92	9	1824	9
FALSE	High	IsMasterProtein	B2RD27	cDNA, FLJ96428, highly similar to Homo sapiens proteasome (prosome, macropain) 26S subunit, non-ATPase, 7 (Mov34 homolog) (PSMD7), mRNA OS=Homo sapiens PE=2 SV=1	0	121.642	22.5309	4	46	4	1	324	37	6.77	High	High	High	High		1.161	92.5416	107.458	93.1	91.9	106.9	108.1	6.356	0	82.44	4	1275	4
FALSE	High	IsMasterProtein	B2RD30	cDNA, FLJ96431 OS=Homo sapiens PE=2 SV=1	0	12.648	9.40439	2	8	2	1	319	36.6	6.61	Peak Found	Peak Found	High	High		1.948	67.8426	132.157	65.7	70	134.3	130	0.233	0	6.85	2	152	2
FALSE	High	IsMasterProtein	B2RD36	cDNA, FLJ96437 OS=Homo sapiens PE=2 SV=1	0	52.567	15.9184	4	19	4	1	245	28	6.79	High	High	High	High	Acetyl [N-Term]	1.248	88.9761	111.024	92.4	85.6	107.6	114.4	2.384	0	14.45	3	447	4
FALSE	High	IsMasterProtein	B2RE88	cDNA, FLJ96465, highly similar to Homo sapiens solute carrier family 25 (mitochondrial carrier;phosphate carrier), member 3 (SLC25A3), nuclear gene encodingmitochondrial protein, transcript variant 1b... OS=Homo sapiens PE=2 SV=1	0	60.879	22.7147	6	60	6	1	361	39.9	9.36	High	High	High	High		0.994	100.278	99.7216	100.4	100.2	99.6	99.8	2.728	0	61.39	6	1173	6
FALSE	High	IsMasterProtein	B2RD71	cDNA, FLJ96486, highly similar to Homo sapiens DEAH (Asp-Glu-Ala-His) box polypeptide 32 (DHX32), mRNA OS=Homo sapiens PE=2 SV=1	0	17.39	8.20996	5	13	5	1	743	84.4	4.97	Peak Found	Peak Found	High	High		13.372	13.9158	186.084	16.7	11.2	183.3	188.8	0.315	0	11.77	5	69	4
FALSE	High	IsMasterProtein	B2RD79	cDNA, FLJ96494, highly similar to Homo sapiens ubiquitin specific peptidase 14 (tRNA-guanine transglycosylase) (USP14), mRNA OS=Homo sapiens PE=2 SV=1	0	184.259	21.6599	11	115	11	1	494	56	5.3	High	High	High	High		1.286	87.4957	112.504	88.4	86.6	111.6	113.4	7.62	0	175.41	10	2684	11
FALSE	High	IsMasterProtein	B2RD96	cDNA, FLJ96514 OS=Homo sapiens PE=2 SV=1	0	26.076	24.6445	4	18	4	1	211	23.4	8.91	High	High	High	High		2.248	61.5802	138.42	60.8	62.4	139.2	137.6	1.371	0	16.87	4	208	4
FALSE	High	IsMasterProtein	B2RDB1	cDNA, FLJ96533, highly similar to Homo sapiens golgi coiled-coil 1 (GCC1), mRNA OS=Homo sapiens PE=2 SV=1	0.001	4.096	1.67742	1	3	1	1	775	87.7	5.45	Not Found	Not Found	Not Found	Not Found									0.043	0	1.68	1	19	1
FALSE	High	IsMasterProtein	B2RDE8	cDNA, FLJ96580, highly similar to Homo sapiens hepatoma-derived growth factor (high-mobility group protein 1-like) (HDGF), mRNA OS=Homo sapiens PE=2 SV=1	0	252.964	55.4167	15	227	15	1	240	26.8	4.67	High	High	High	High		1.154	92.8551	107.145	93.7	92	106.3	108	86.333	0	306.21	15	4446	15
FALSE	High	IsMasterProtein	B2RDH6	cDNA, FLJ96613, highly similar to Homo sapiens vacuolar protein sorting 33A (yeast) (VPS33A), mRNA OS=Homo sapiens PE=2 SV=1	0	28.999	12.9195	5	12	5	1	596	67.6	7.08	Peak Found	Peak Found	High	High		1.909	68.7557	131.244	123.3	14.2	76.7	185.8	0.315	0	14.09	5	252	5
FALSE	High	IsMasterProtein	B2RDI5	cDNA, FLJ96627, highly similar to Homo sapiens calpain 1, (mu/I) large subunit (CAPN1), mRNA OS=Homo sapiens PE=2 SV=1	0	202.97	30.6723	17	113	17	1	714	81.8	5.54	High	High	High	High	Acetyl [N-Term]	1.188	91.412	108.588	90.3	92.5	109.7	107.5	4.471	0	128.7	16	2293	17
FALSE	High	IsMasterProtein	B2RDL4	cDNA, FLJ96667 OS=Homo sapiens PE=2 SV=1	0	8.518	2.48538	1	2	1	1	684	77.2	5.63	Not Found	Not Found	High	Not Found		100		200			200		0.059	0	2.51	1	110	1
FALSE	High	IsMasterProtein	B2RDP1	cDNA, FLJ96701 OS=Homo sapiens PE=2 SV=1	0	10.57	9.66981	2	10	2	1	424	46.8	9.26	Peak Found	Not Found	High	High		41.584	4.75237	197.624	4.8		195.2	200	0.389	0	2.24	2	103	2
FALSE	High	IsMasterProtein	B2RDP6	cDNA, FLJ96709, highly similar to Homo sapiens glutamate rich WD repeat protein GRWD (GRWD), mRNA OS=Homo sapiens PE=2 SV=1	0	100.23	21.3004	7	55	7	1	446	49.4	4.92	High	High	High	High		1.628	76.0906	123.909	75.4	76.7	124.6	123.3	4.623	0	81.7	7	1314	7
FALSE	High	IsMasterProtein	B2RDQ3	cDNA, FLJ96718, highly similar to Homo sapiens splicing factor, arginine/serine-rich 10 (transformer 2 homolog, Drosophila) (SFRS10), mRNA OS=Homo sapiens PE=2 SV=1	0	79.205	17.7083	3	38	2	1	288	33.7	11.25	High	High	High	High		1.143	93.3081	106.692	92.4	94.2	107.6	105.8	4.337	1	54.5	3	1411	3
FALSE	High	IsMasterProtein	B2RDR2	cDNA, FLJ96730, highly similar to Homo sapiens sorting nexin 15 (SNX15), transcript variant A, mRNA OS=Homo sapiens PE=2 SV=1	0.005	2.659	2.63158	1	2	1	1	342	38.3	5.19	Not Found	Not Found	Not Found	Not Found									0.105	0	2.24	1	34	1
FALSE	High	IsMasterProtein	B2RDT8	cDNA, FLJ96764, highly similar to Homo sapiens sorting nexin 8 (SNX8), mRNA OS=Homo sapiens PE=2 SV=1	0	39.012	19.5699	7	24	7	1	465	52.6	7.39	High	High	High	High		1.816	71.0193	128.981	70.9	71.2	129.1	128.8	0.978	0	33.39	7	377	7
FALSE	High	IsMasterProtein	B2RDW0	cDNA, FLJ96792, highly similar to Homo sapiens calmodulin 2 (phosphorylase kinase, delta) (CALM2), mRNA OS=Homo sapiens PE=2 SV=1	0	269.902	55.0336	9	300	8	1	149	16.8	4.22	High	High	High	High	Acetyl [N-Term]	1.366	84.5235	115.476	84.6	84.4	115.4	115.6	7942.28	2	401.01	6	7555	9
FALSE	High	IsMasterProtein	B2RDX7	cDNA, FLJ96814, highly similar to Homo sapiens CCR4-NOT transcription complex, subunit 2 (CNOT2),mRNA OS=Homo sapiens PE=2 SV=1	0	21.21	8.33333	3	12	3	1	540	59.7	7.66	High	High	High	High		2.001	66.6519	133.348	65.2	68.1	134.8	131.9	0.389	0	14.78	3	160	3
FALSE	Medium	IsMasterProtein	B2RDY0	cDNA, FLJ96821, highly similar to Homo sapiens solute carrier family 35, member F5 (SLC35F5), mRNA OS=Homo sapiens PE=2 SV=1	0.026	1.018	3.44168	1	1	1	1	523	58.8	9.26	Not Found	Not Found	Not Found	Not Found									0.129	0	0	1
FALSE	High	IsMasterProtein	B2RDZ9	cDNA, FLJ96850 OS=Homo sapiens PE=2 SV=1	0	117.579	43.6426	9	54	9	1	291	31.9	5.27	High	High	High	High	Acetyl [N-Term]	1.173	92.056	107.944	93.4	90.7	106.6	109.3	5.952	0	71.47	8	1180	9
FALSE	High	IsMasterProtein	B2RE29	cDNA, FLJ96893, highly similar to Homo sapiens nudix (nucleoside diphosphate linked moiety X)-typemotif 4 (NUDT4), mRNA OS=Homo sapiens PE=2 SV=1	0	18.956	13.8122	2	8	2	1	181	20.5	6.35	High	Peak Found	High	High		3.07	49.1404	150.86	42.9	55.3	157.1	144.7	0.995	0	9.82	2	221	2
FALSE	High	IsMasterProtein	B2RE30	cDNA, FLJ96895, highly similar to Homo sapiens TBC1 domain family, member 22A (TBC1D22A), mRNA OS=Homo sapiens PE=2 SV=1	0	9.44	4.25532	1	4	1	1	517	59.1	6.15	Not Found	Peak Found	Not Found	High		2.764	53.1368	146.863		53.1		146.9	0.086	0	5.6	1	112	1
FALSE	High	IsMasterProtein	B2RE34	cDNA, FLJ96901, highly similar to Homo sapiens Rac GTPase activating protein 1 (RACGAP1), mRNA OS=Homo sapiens PE=2 SV=1	0	25.825	13.1329	7	27	7	1	632	70.9	8.95	Peak Found	Not Found	High	High		48.276	4.10036	197.95	4.1		195.9	200	0.512	0	33.63	7	480	7
FALSE	High	IsMasterProtein	B2RE36	cDNA, FLJ96903 OS=Homo sapiens PE=2 SV=1	0.009	2.142	4.33071	1	4	1	1	254	29.4	7.06	Peak Found	Peak Found	High	High		2.027	66.0737	133.926		66.1		133.9	0.129	0	4.14	1	0	1
FALSE	High	IsMasterProtein	B2RE46	cDNA, FLJ96923, highly similar to Homo sapiens ribophorin II (RPN2), mRNA OS=Homo sapiens PE=2 SV=1	0	282.826	42.7892	16	128	16	1	631	69.3	5.78	High	High	High	High		1.268	88.1774	111.823	88.6	87.8	111.4	112.2	9.771	0	194.73	16	3649	16
FALSE	High	IsMasterProtein	X5D7A8	Cell adhesion molecule 1 isoform A (Fragment) OS=Homo sapiens GN=CADM1 PE=2 SV=1	0.001	4.794	2.76008	1	4	1	1	471	51.5	4.87	Not Found	Not Found	High	High									0.105	0	6.49	1	93	1
FALSE	High	IsMasterProtein	Q8NFZ8	Cell adhesion molecule 4 OS=Homo sapiens GN=CADM4 PE=1 SV=1	0	9.822	4.38144	1	2	1	1	388	42.8	6.3	Not Found	Not Found	Not Found	High		100		200				200	0.145	0	2.77	1	97	1
FALSE	High	IsMasterProtein	ch11i_Q99638	Cell cycle checkpoint control protein RAD9A OS=Homo sapiens GN=RAD9A PE=1 SV=1	0	15.961	4.34783	1	6	1	1	391	42.5	5.66	High	High	Peak Found	High		0.968	101.629	98.3714	105.7	97.5	94.3	102.5	0.259	0	9.02	1	181	1
FALSE	High	IsMasterProtein	ch05u_O60671	Cell cycle checkpoint protein RAD1 OS=Homo sapiens GN=RAD1 PE=1 SV=1	0	8.095	8.51064	1	1	1	1	282	31.8	4.83	Not Found	Not Found	Not Found	Not Found									0.145	0			77	1
FALSE	High	IsMasterProtein	ch06u_Q9NV96	Cell cycle control protein 50A OS=Homo sapiens GN=TMEM30A PE=1 SV=1	0	14.319	11.3573	3	8	3	1	361	40.7	8.59	Not Found	Not Found	High	High									0.438	0	7.82	3	115	3
FALSE	High	IsMasterProtein	ch15i_Q9NQS1	Cell death regulator Aven OS=Homo sapiens GN=AVEN PE=1 SV=1	0	68.414	17.6796	3	14	3	1	362	38.5	4.98	High	Peak Found	High	High		2.369	59.3663	140.634	55.5	63.2	144.5	136.8	0.823	0	30.26	3	452	3
FALSE	High	IsMasterProtein	A0A024RA85	Cell division cycle 2-like 5 (Cholinesterase-related cell division controller), isoform CRA_a OS=Homo sapiens GN=CDC2L5 PE=4 SV=1	0	37.922	4.16667	4	21	3	1	1512	164.8	9.69	High	High	High	High		2.796	52.6921	147.308	57.6	47.7	142.4	152.3	0.191	0	26.74	4	365	4
FALSE	High	IsMasterProtein	ch10u_Q8IX12	Cell division cycle and apoptosis regulator protein 1 OS=Homo sapiens GN=CCAR1 PE=1 SV=2	0	64.65	9.13043	7	40	7	1	1150	132.7	5.76	High	High	High	High		1.676	74.7465	125.253	73.4	76.1	126.6	123.9	0.559	0	49.58	7	545	7
FALSE	High	IsMasterProtein	A0A024R8Y0	Cell division cycle associated 1, isoform CRA_a OS=Homo sapiens GN=CDCA1 PE=4 SV=1	0	8.276	3.87931	1	2	1	1	464	54.3	8.27	Peak Found	Not Found	High	Not Found		11.064	16.5781	183.422	16.6		183.4		0.077	0	4.12	1	50	1
FALSE	High	IsMasterProtein	ch10i_O75794	Cell division cycle protein 123 homolog OS=Homo sapiens GN=CDC123 PE=1 SV=1	0	24.825	17.5595	5	22	5	1	336	39.1	4.81	Peak Found	Peak Found	High	High		3.91	40.7364	159.264	36.6	44.8	163.4	155.2	0.833	0	21.61	5	321	5
FALSE	High	IsMasterProtein	ch13i_Q13042	Cell division cycle protein 16 homolog OS=Homo sapiens GN=CDC16 PE=1 SV=2	0	17.855	5.64516	3	12	3	1	620	71.6	5.85	High	High	High	High		1.421	82.6199	117.38	81.1	84.2	118.9	115.8	0.283	0	12.35	3	202	3
FALSE	High	IsMasterProtein	ch01i_Q12834	Cell division cycle protein 20 homolog OS=Homo sapiens GN=CDC20 PE=1 SV=2	0	46.354	7.01403	2	18	2	1	499	54.7	9.23	Peak Found	Peak Found	High	High		31.588	6.13717	193.863	6.9	5.4	193.1	194.6	0.557	0	32.74	2	461	2
FALSE	High	IsMasterProtein	ch05i_Q9UJX2	Cell division cycle protein 23 homolog OS=Homo sapiens GN=CDC23 PE=1 SV=3	0	51.503	19.598	8	27	7	1	597	68.8	7.02	High	High	High	High		1.751	72.704	127.296	76.4	69	123.6	131	0.863	1	30.4	8	409	7
FALSE	High	IsMasterProtein	ch08i_Q69YH5	Cell division cycle-associated protein 2 OS=Homo sapiens GN=CDCA2 PE=1 SV=2	0	36.194	8.6999	5	14	5	1	1023	112.6	8.4	Not Found	Not Found	High	High		100		200			200	200	0.215	0	16.52	5	377	5
FALSE	High	IsMasterProtein	ch04i_Q9NX58	Cell growth-regulating nucleolar protein OS=Homo sapiens GN=LYAR PE=1 SV=2	0	160.658	40.1055	11	85	11	1	379	43.6	9.54	High	High	High	High		1.079	96.1847	103.815	95.7	96.6	104.3	103.4	14.505	0	91.87	10	1488	11
FALSE	High	IsMasterProtein	D6RAT4	Cellular nucleic acid-binding protein (Fragment) OS=Homo sapiens GN=CNBP PE=1 SV=8	0	21.345	14.1593	1	12	1	1	113	12.2	8.21	High	High	High	High		2.291	60.7644	139.236	61	60.5	139	139.5	1.683	0	16.79	1	406	1
FALSE	High	IsMasterProtein	ch03i_P62633	Cellular nucleic acid-binding protein OS=Homo sapiens GN=CNBP PE=1 SV=1	0	56.101	23.1638	3	48	1	1	177	19.5	7.71	High	High	High	High		1.975	67.2362	132.764	67.2	67.3	132.8	132.7	2.415	3	60.63	3	907	3
FALSE	High	IsMasterProtein	chXi_P41208	Centrin-2 OS=Homo sapiens GN=CETN2 PE=1 SV=1	0	17.007	9.88372	1	6	1	1	172	19.7	5	Peak Found	High	High	High		7.564	23.3526	176.647	24	22.7	176	177.3	0.585	0	9.64	1	210	1
FALSE	High	IsMasterProtein	P49454	Centromere protein F OS=Homo sapiens GN=CENPF PE=1 SV=2	0	89.122	5.88785	15	42	15	1	3210	367.5	5.07	Peak Found	Peak Found	High	High		8.78	20.4499	179.55	28.4	12.5	171.6	187.5	0.167	0	49.48	15	613	15
FALSE	High	IsMasterProtein	ch05u_Q9H3R5	Centromere protein H OS=Homo sapiens GN=CENPH PE=1 SV=1	0	28.086	19.8381	4	20	4	1	247	28.5	5.29	High	High	High	High		6.594	26.3376	173.662	25.7	26.9	174.3	173.1	0.833	0	21.56	4	378	4
FALSE	High	IsMasterProtein	ch05u_Q9BS16	Centromere protein K OS=Homo sapiens GN=CENPK PE=1 SV=1	0	12.93	10.7807	2	4	2	1	269	31.6	4.89	Peak Found	Not Found	High	Not Found		12.506	14.8078	185.192	14.8		185.2		0.311	0	2.98	2	77	2
FALSE	High	IsMasterProtein	ch02u_Q9BU64	Centromere protein O OS=Homo sapiens GN=CENPO PE=1 SV=1	0	6.622	5	1	2	1	1	300	33.8	7.71	Not Found	Not Found	Not Found	Not Found									0.166	0	2.96	1	74	1
FALSE	High	IsMasterProtein	Q8N2Z9	Centromere protein S OS=Homo sapiens GN=APITD1 PE=1 SV=1	0	5.205	7.97101	1	4	1	1	138	15.9	6.05	Peak Found	Peak Found	High	High		4.569	35.9132	164.087	38.9	33	161.1	167	0.212	0	4.23	1	98	1
FALSE	High	IsMasterProtein	ch04i_Q02224	Centromere-associated protein E OS=Homo sapiens GN=CENPE PE=1 SV=2	0	6.307	0.851536	2	4	2	1	2701	316.2	5.64	Not Found	Not Found	High	Not Found		100		200			200		0.022	0	2.26	1	33	2
FALSE	High	IsMasterProtein	A0A024R914	Centrosomal protein 350kDa, isoform CRA_a OS=Homo sapiens GN=CEP350 PE=4 SV=1	0.001	4.837	0.545396	1	2	1	1	3117	350.7	6.34	Not Found	Not Found	High	Not Found									0.012	0	2.9	1	30	1
FALSE	High	IsMasterProtein	D3DR37	Centrosomal protein 55kDa, isoform CRA_a OS=Homo sapiens GN=CEP55 PE=1 SV=1	0	40.347	17.4569	5	20	3	1	464	54.1	6.96	Not Found	Peak Found	High	High		25.451	7.70676	196.147		7.7	200	192.3	0.54	2	30.05	5	539	5
FALSE	High	IsMasterProtein	A0A024QYZ9	Centrosomal protein 72kDa, isoform CRA_b OS=Homo sapiens GN=CEP72 PE=4 SV=1	0.006	2.576	2.62751	1	2	1	1	647	71.6	6.52	Not Found	Not Found	Not Found	Not Found									0.055	0	1.89	1	29	1
FALSE	High	IsMasterProtein	ch17u_Q9UPN4	Centrosomal protein of 131 kDa OS=Homo sapiens GN=CEP131 PE=1 SV=3	0	25.019	6.46353	5	11	5	1	1083	122.1	8.69	Not Found	High	High	High		1.004	99.7904	100.21		99.8		100.2	0.173	0	14.08	5	173	4
FALSE	High	IsMasterProtein	ch01i_Q5SW79	Centrosomal protein of 170 kDa OS=Homo sapiens GN=CEP170 PE=1 SV=1	0	90.113	9.53283	10	53	10	1	1584	175.2	7.11	High	High	High	High		2.121	64.082	135.918	67.1	61.1	132.9	138.9	0.389	0	69.95	10	1041	9
FALSE	High	IsMasterProtein	J3KQR7	Centrosomal protein of 170 kDa protein B OS=Homo sapiens GN=CEP170B PE=1 SV=1	0.001	4.716	2.26415	2	4	2	1	1590	171.7	6.84	Not Found	Not Found	High	Not Found		100		200			200		0.049	0	1.95	2	66	2
FALSE	High	IsMasterProtein	Q9BYV8	Centrosomal protein of 41 kDa OS=Homo sapiens GN=CEP41 PE=1 SV=1	0	32.69	11.2601	2	14	2	1	373	41.3	8.32	High	High	High	High		3.42	45.2512	154.749	41.7	48.8	158.3	151.2	0.389	0	11.08	2	504	2
FALSE	High	IsMasterProtein	ch10u_H0Y432	Centrosomal protein of 55 kDa (Fragment) OS=Homo sapiens GN=CEP55 PE=1 SV=1	0	16.399	19.7115	3	10	1	1	208	24.7	6.18	Peak Found	Not Found	High	Not Found		4.434	36.8084	163.192	36.8		163.2		0.848	0	7.92	3	179	3
FALSE	High	IsMasterProtein	Q6P2H3	Centrosomal protein of 85 kDa OS=Homo sapiens GN=CEP85 PE=1 SV=1	0	11.84	3.93701	2	8	2	1	762	85.6	6	Not Found	Not Found	High	High		100		200			200	200	0.105	0	10.85	2	217	2
FALSE	Medium	IsMasterProtein	ch20i_Q9BV73	Centrosome-associated protein CEP250 OS=Homo sapiens GN=CEP250 PE=1 SV=2	0.022	1.198	0.4914	1	2	1	1	2442	281	5.02	Peak Found	Not Found	High	Not Found		1.24	89.2866	110.713	89.3		110.7		0.014	0	0	1	0	1
FALSE	High	IsMasterProtein	Q5TA50	Ceramide-1-phosphate transfer protein OS=Homo sapiens GN=CPTP PE=1 SV=1	0	8.913	10.2804	1	2	1	1	214	24.4	7.21	Not Found	Not Found	Not Found	High									0.155	0	3.12	1	45	1
FALSE	High	IsMasterProtein	ch16i_Q01850	Cerebellar degeneration-related protein 2 OS=Homo sapiens GN=CDR2 PE=1 SV=2	0.001	4.272	2.20264	1	2	1	1	454	51.8	5.06	Not Found	Not Found	Not Found	High		100		200				200	0.077	0	2.06	1	57	1
FALSE	High	IsMasterProtein	ch03i_Q9UFW8	CGG triplet repeat-binding protein 1 OS=Homo sapiens GN=CGGBP1 PE=1 SV=2	0	22.146	41.9162	5	16	5	1	167	18.8	8.95	Peak Found	Peak Found	High	High		6.541	26.521	173.479	31.2	21.9	168.8	178.1	1.61	0	21.61	5	250	5
FALSE	High	IsMasterProtein	Q9Y3E8	CGI-150 protein OS=Homo sapiens PE=2 SV=1	0	83.317	17.2619	6	74	6	1	504	55	8.7	High	High	High	High		1.101	95.1943	104.806	94.6	95.8	105.4	104.2	1.581	0	92.86	6	1506	6
FALSE	High	IsMasterProtein	ch16i_Q9HD42	Charged multivesicular body protein 1a OS=Homo sapiens GN=CHMP1A PE=1 SV=1	0	5.665	8.67347	2	4	2	1	196	21.7	8.06	High	Not Found	Peak Found	High	Acetyl [N-Term]	2.601	55.5437	144.456	55.5		144.5		0.585	0	2.04	2	42	2
FALSE	High	IsMasterProtein	ch19i_O43633	Charged multivesicular body protein 2a OS=Homo sapiens GN=CHMP2A PE=1 SV=1	0	35.16	11.7117	3	11	3	1	222	25.1	5.97	Peak Found	Peak Found	High	High	Acetyl [N-Term]	5.071	32.9441	167.056	39.3	26.6	160.7	173.4	1.154	0	19.3	3	496	3
FALSE	High	IsMasterProtein	ch03u_Q9UQN3	Charged multivesicular body protein 2b OS=Homo sapiens GN=CHMP2B PE=1 SV=1	0	4.973	7.98122	2	4	2	1	213	23.9	8.76	Not Found	Peak Found	Not Found	High		6.689	26.0106	173.989		26		174	0.389	0	1.99	2	0	2
FALSE	High	IsMasterProtein	Q9H444	Charged multivesicular body protein 4b OS=Homo sapiens GN=CHMP4B PE=1 SV=1	0	24.36	13.3929	2	16	2	1	224	24.9	4.82	High	High	High	High		2.938	50.7827	149.217	51.2	50.4	148.8	149.6	0.638	0	24.03	2	560	2
FALSE	High	IsMasterProtein	ch09u_Q9NZZ3	Charged multivesicular body protein 5 OS=Homo sapiens GN=CHMP5 PE=1 SV=1	0	33.273	25.1142	4	46	4	1	219	24.6	4.83	High	High	High	High		2.939	50.778	149.222	51	50.5	149	149.5	4.623	0	47.97	4	796	4
FALSE	High	IsMasterProtein	ch17u_I3L4A1	Charged multivesicular body protein 6 (Fragment) OS=Homo sapiens GN=CHMP6 PE=1 SV=1	0	13.99	5.80357	1	6	1	1	224	25.8	4.92	Peak Found	High	High	High		0.877	106.542	93.4579	101.4	111.6	98.6	88.4	0.468	0	7.69	1	208	1
FALSE	High	IsMasterProtein	ch07i_O60921	Checkpoint protein HUS1 OS=Homo sapiens GN=HUS1 PE=1 SV=1	0	6.939	5	1	4	1	1	280	31.7	6.84	Peak Found	Not Found	High	High		6.214	27.7245	172.275	27.7		172.3		0.179	0	5.36	1	113	1
FALSE	High	IsMasterProtein	ch16u_Q9BT22	Chitobiosyldiphosphodolichol beta-mannosyltransferase OS=Homo sapiens GN=ALG1 PE=1 SV=2	0	29.565	6.46552	2	12	2	1	464	52.5	7.23	High	High	High	High		1.429	82.3433	117.657	85.4	79.3	114.6	120.7	0.468	0	16.85	2	303	2
FALSE	High	IsMasterProtein	H0Y2M6	Chloride channel 7, isoform CRA_c OS=Homo sapiens GN=CLCN7 PE=1 SV=1	0	7.811	2.21976	1	4	1	1	901	97.2	8.27	Peak Found	Peak Found	High	High		4.236	38.2001	161.8	27.6	48.8	172.4	151.2	0.061	0	5.55	1	70	1
FALSE	High	IsMasterProtein	A0A024R0G0	Chloride channel CLIC-like 1, isoform CRA_b OS=Homo sapiens GN=CLCC1 PE=4 SV=1	0	27.318	5.44465	1	15	1	1	551	62	5.55	High	High	Peak Found	High		1.622	76.277	123.723	76.2	76.4	123.8	123.6	0.354	0	7.81	1	231	1
FALSE	High	IsMasterProtein	ch07u_P35523	Chloride channel protein 1 OS=Homo sapiens GN=CLCN1 PE=1 SV=3	0	6.158	1.92308	2	10	2	1	988	108.6	6.02	High	High	High	High		2.476	57.5356	142.464	50.4	64.7	149.6	135.3	0.051	0	9.55	2	99	2
FALSE	High	IsMasterProtein	ch06i_O00299	Chloride intracellular channel protein 1 OS=Homo sapiens GN=CLIC1 PE=1 SV=4	0	276.636	68.4647	11	198	11	1	241	26.9	5.17	High	High	High	High	Acetyl [N-Term]	1.244	89.1103	110.89	89.5	88.8	110.5	111.2	86.333	0	288.56	10	4952	11
FALSE	High	IsMasterProtein	Q6FIC5	Chloride intracellular channel protein OS=Homo sapiens GN=CLIC4 PE=2 SV=1	0	96.426	31.6206	6	52	6	1	253	28.8	5.59	High	High	High	High		2.181	62.8811	137.119	61.7	64	138.3	136	4.817	0	78.87	6	1283	6
FALSE	High	IsMasterProtein	ch11u_P35790	Choline kinase alpha OS=Homo sapiens GN=CHKA PE=1 SV=3	0	13.375	7.87746	2	4	2	1	457	52.2	6.55	Not Found	Peak Found	Not Found	High		3.108	48.6881	151.312		48.7		151.3	0.202	0	5.5	2	135	2
FALSE	High	IsMasterProtein	ch03u_C9JEJ2	Choline-phosphate cytidylyltransferase A OS=Homo sapiens GN=PCYT1A PE=1 SV=1	0	84.544	24.2105	6	46	6	1	380	43.2	8.5	High	High	High	High		1.701	74.036	125.964	77.3	70.8	122.7	129.2	1.807	0	51.81	6	999	6
FALSE	High	IsMasterProtein	ch12i_Q8WUD6	Cholinephosphotransferase 1 OS=Homo sapiens GN=CHPT1 PE=1 SV=1	0	9.651	6.89655	2	4	2	1	406	45.1	6.92	Not Found	Peak Found	High	High		5.75	32.0009	184		32	200	168	0.425	0	5.23	2	56	2
FALSE	Medium	IsMasterProtein	Q59FG9	Chondroitin sulfate proteoglycan 2 (Versican) variant (Fragment) OS=Homo sapiens PE=2 SV=1	0.011	1.956	0.439883	1	2	1	1	3410	374.1	4.53	Not Found	Not Found	High	Not Found		100		200			200		0.015	0	0	1	0	1
FALSE	High	IsMasterProtein	ch08i_Q9NRG0	Chromatin accessibility complex protein 1 OS=Homo sapiens GN=CHRAC1 PE=1 SV=1	0	24.001	19.8473	2	18	2	1	131	14.7	5.1	High	High	High	High		1.951	67.7779	132.222	73.6	61.9	126.4	138.1	3.642	0	21	2	349	2
FALSE	High	IsMasterProtein	ch19u_Q13111	Chromatin assembly factor 1 subunit A OS=Homo sapiens GN=CHAF1A PE=1 SV=2	0	45.777	12.7615	6	20	6	1	956	106.9	5.94	Peak Found	Peak Found	High	High		4.402	37.0199	162.98	43.2	30.9	156.8	169.1	0.342	0	27.37	6	333	6
FALSE	High	IsMasterProtein	ch17i_P83916	Chromobox protein homolog 1 OS=Homo sapiens GN=CBX1 PE=1 SV=1	0	83.924	32.973	5	46	5	1	185	21.4	4.93	High	High	High	High		1.817	70.9991	129.001	59.8	82.2	140.2	117.8	5.813	0	68.02	5	1201	5
FALSE	High	IsMasterProtein	ch07i_Q13185	Chromobox protein homolog 3 OS=Homo sapiens GN=CBX3 PE=1 SV=4	0	128.028	37.1585	6	124	5	1	183	20.8	5.33	High	High	High	High		2.509	56.9899	143.01	56	58	144	142	99	0	178.11	6	2578	6
FALSE	High	IsMasterProtein	ch12u_P45973	Chromobox protein homolog 5 OS=Homo sapiens GN=CBX5 PE=1 SV=1	0	109.453	38.7435	7	70	6	1	191	22.2	5.86	High	High	High	High		2.444	58.0742	141.926	58.4	57.8	141.6	142.2	45.416	1	97.7	7	1110	7
FALSE	High	IsMasterProtein	ch17i_Q9HC52	Chromobox protein homolog 8 OS=Homo sapiens GN=CBX8 PE=1 SV=3	0	18.726	11.3111	3	10	3	1	389	43.4	9.91	High	High	High	High		2.75	53.3264	146.674	57.4	49.2	142.6	150.8	0.369	0	14.7	3	229	3
FALSE	High	IsMasterProtein	Q9Y232	Chromodomain Y-like protein OS=Homo sapiens GN=CDYL PE=1 SV=2	0	13.884	4.8495	2	6	2	1	598	66.4	9.45	Not Found	Not Found	High	High		100		200			200	200	0.145	0	7.71	2	189	2
FALSE	High	IsMasterProtein	ch05u_O14646	Chromodomain-helicase-DNA-binding protein 1 OS=Homo sapiens GN=CHD1 PE=1 SV=2	0	46.27	7.77778	9	32	8	1	1710	196.6	7.14	Peak Found	High	High	High		3.099	48.7974	151.203	50	47.6	150	152.4	0.238	0	26.16	9	378	9
FALSE	High	IsMasterProtein	Q86WJ1	Chromodomain-helicase-DNA-binding protein 1-like OS=Homo sapiens GN=CHD1L PE=1 SV=2	0	21.891	5.90858	4	16	4	1	897	100.9	6.9	Peak Found	Peak Found	High	High		3.499	44.4532	155.547	47.3	41.6	152.7	158.4	0.224	0	14.35	4	164	4
FALSE	High	IsMasterProtein	O14647	Chromodomain-helicase-DNA-binding protein 2 OS=Homo sapiens GN=CHD2 PE=1 SV=2	0	12.65	1.91466	3	6	2	1	1828	211.2	8.1	Not Found	Peak Found	Not Found	High		1.374	84.2455	115.754		84.2		115.8	0.066	0	3.33	2	130	3
FALSE	High	IsMasterProtein	H7C0J3	Chromodomain-helicase-DNA-binding protein 3 (Fragment) OS=Homo sapiens GN=CHD3 PE=1 SV=1	0	44.034	14.3603	3	27	1	1	383	41.8	10.52	Peak Found	Peak Found	High	High		3.108	48.69	151.31	50.5	46.9	149.5	153.1	0.823	0	36.27	3	416	3
FALSE	High	IsMasterProtein	ch20i_Q8TD26	Chromodomain-helicase-DNA-binding protein 6 OS=Homo sapiens GN=CHD6 PE=1 SV=4	0	16.375	1.65746	4	12	1	1	2715	305.2	6.27	Not Found	High	High	High		100		200			200	200	0.079	0	5.14	4	93	4
FALSE	High	IsMasterProtein	ch14u_Q9HCK8	Chromodomain-helicase-DNA-binding protein 8 OS=Homo sapiens GN=CHD8 PE=1 SV=5	0	42.038	4.88183	7	16	5	1	2581	290.3	6.47	Peak Found	Peak Found	High	High		13.811	13.5034	186.497	12.5	14.5	187.5	185.5	0.123	2	18.26	7	275	7
FALSE	High	IsMasterProtein	A0A024R978	Chromosome 1 open reading frame 24, isoform CRA_a OS=Homo sapiens GN=C1orf24 PE=4 SV=1	0	6.018	1.40086	1	2	1	1	928	103.1	4.78	Not Found	Not Found	Not Found	Not Found									0.053	0	2.05	1	46	1
FALSE	High	IsMasterProtein	Q53FM2	Chromosome 1 open reading frame 48 variant (Fragment) OS=Homo sapiens GN=C1orf48 PE=2 SV=1	0	15.796	11.032	2	8	2	1	281	32.1	6.79	Peak Found	Peak Found	High	High		3.869	41.0767	158.923	43.8	38.3	156.2	161.7	0.311	0	14.12	2	177	2
FALSE	High	IsMasterProtein	Q5TDE9	Chromosome 1 open reading frame 57, isoform CRA_d OS=Homo sapiens GN=C1orf57 PE=2 SV=1	0	62.939	48.4211	7	54	7	1	190	20.7	9.54	High	High	High	High		2.037	65.8519	134.148	62.5	69.2	137.5	130.8	7.483	0	63.19	7	839	7
FALSE	High	IsMasterProtein	A0A024R5U9	Chromosome 1 open reading frame 71, isoform CRA_d OS=Homo sapiens GN=C1orf71 PE=4 SV=1	0	7.27	1.93103	1	2	1	1	725	79.5	4.53	Not Found	Peak Found	Not Found	High		3.063	49.2297	150.77		49.2		150.8	0.075	0	2.54	1	62	1
FALSE	High	IsMasterProtein	ch10u_A0A0C4DFN5	Chromosome 10 open reading frame 61 OS=Homo sapiens GN=TCTN3 PE=1 SV=1	0.001	4.018	4.48	1	2	1	1	625	68	8.03	Not Found	Not Found	Not Found	Not Found									0.093	0	0	1	22	1
FALSE	High	IsMasterProtein	F5H7W8	Chromosome 12 open reading frame 43, isoform CRA_a OS=Homo sapiens GN=C12orf43 PE=1 SV=2	0	37.603	18.0887	3	14	3	1	293	31.7	9.32	High	High	High	High		1.823	70.8348	129.165	67.4	74.3	132.6	125.7	1.154	0	21.59	3	336	3
FALSE	High	IsMasterProtein	A0A024R667	Chromosome 14 open reading frame 150, isoform CRA_a OS=Homo sapiens GN=C14orf150 PE=4 SV=1	0	43.545	15.7623	4	16	4	1	387	43.2	6.13	High	High	High	High		2.076	65.0214	134.979	70	60	130	140	0.73	0	20.63	4	574	4
FALSE	High	IsMasterProtein	A0A024R9K7	Chromosome 15 open reading frame 24, isoform CRA_b OS=Homo sapiens GN=C15orf24 PE=4 SV=1	0	10.238	9.0625	2	5	2	1	320	35.4	9.6	Peak Found	High	High	High		4.392	37.0891	162.911	17.5	56.7	182.5	143.3	0.292	0	6.66	2	127	1
FALSE	High	IsMasterProtein	ch20i_A0A087WXK8	Chromosome 20 open reading frame 129 OS=Homo sapiens GN=FAM83D PE=1 SV=1	0	20.356	7.96748	3	10	3	1	615	67.6	6.95	Not Found	Peak Found	High	High		1.931	82.2721	158.864		82.3	200	117.7	0.218	0	13.65	3	311	3
FALSE	High	IsMasterProtein	B0UZZ8	Chromosome 6 open reading frame 11 OS=Homo sapiens GN=WDR46 PE=2 SV=1	0	72.887	16.5574	8	30	8	1	610	68	9.67	High	High	High	High		5.22	32.1563	167.844	31.4	32.9	168.6	167.1	0.931	0	41.29	8	646	8
FALSE	Medium	IsMasterProtein	A0A024RCY7	Chromosome 6 open reading frame 64, isoform CRA_a OS=Homo sapiens GN=C6orf64 PE=4 SV=1	0.011	1.952	8.92857	1	4	1	1	224	24.6	9.94	Not Found	Not Found	High	High		100		200			200	200	0.233	0	4.03	1	54	1
FALSE	High	IsMasterProtein	B4DQM3	Chromosome 7 open reading frame 25, isoform CRA_b OS=Homo sapiens GN=C7orf25 PE=2 SV=1	0	14.379	8.97704	2	4	2	1	479	52.5	6.96	Peak Found	Not Found	High	High		2.537	65.8443	167.078	65.8		134.2	200	0.16	0	4.97	2	97	2
FALSE	High	IsMasterProtein	A0A024R8I8	Chromosome 9 open reading frame 140, isoform CRA_a OS=Homo sapiens GN=C9orf140 PE=4 SV=1	0	10.534	5.07614	1	4	1	1	394	42.5	8.66	Peak Found	Peak Found	High	High		18.565	10.2224	189.778	6.8	13.6	193.2	186.4	0.086	0	5.38	1	219	1
FALSE	High	IsMasterProtein	D3DRP5	Chromosome 9 open reading frame 19, isoform CRA_a (Fragment) OS=Homo sapiens GN=C9orf19 PE=4 SV=1	0	27.753	8.54701	2	12	2	1	351	37.8	10.84	High	High	High	High		0.862	107.396	92.6044	110.8	104	89.2	96	0.425	0	11.17	2	228	2
FALSE	High	IsMasterProtein	Q96JM3	Chromosome alignment-maintaining phosphoprotein 1 OS=Homo sapiens GN=CHAMP1 PE=1 SV=2	0	15.958	5.29557	3	8	3	1	812	89	8.44	Peak Found	Peak Found	High	High		1.996	66.7637	133.236	59.6	74	140.4	126	0.126	0	6.48	3	144	3
FALSE	High	IsMasterProtein	ch16i_A0A0D9SF58	Chromosome transmission fidelity protein 18 homolog OS=Homo sapiens GN=CHTF18 PE=1 SV=1	0	10.605	1.60473	1	6	1	1	1184	129.3	9.41	Peak Found	Peak Found	High	High		2.166	63.1663	136.834	60	66.3	140	133.7	0.067	0	10.77	1	72	1
FALSE	High	IsMasterProtein	Q59HG1	Chromosome-associated kinesin KIF4A variant (Fragment) OS=Homo sapiens PE=2 SV=1	0	47.645	12.3887	9	24	5	1	1235	140.3	6.27	Not Found	Peak Found	High	High		2.921	51.0067	148.993	73.3	28.7	126.7	171.3	0.309	3	26.68	9	395	9
FALSE	High	IsMasterProtein	ch16i_Q9Y6A4	Cilia- and flagella-associated protein 20 OS=Homo sapiens GN=CFAP20 PE=1 SV=1	0	47.303	30.5699	3	20	3	1	193	22.8	9.76	High	High	High	High		1.581	77.4842	122.516	80.4	74.5	119.6	125.5	2.831	0	24.72	3	466	3
FALSE	Medium	IsMasterProtein	B9EK46	Cingulin OS=Homo sapiens GN=CGN PE=2 SV=1	0.02	1.369	0.997506	1	1	1	1	1203	137	5.52	Not Found	Peak Found	Not Found	High		1.284	87.5587	112.441		87.6		112.4	0.025	0	1.68	1
FALSE	High	IsMasterProtein	ch12i_H0YIC4	Citrate synthase (Fragment) OS=Homo sapiens GN=CS PE=1 SV=1	0	38.788	33.3333	4	52	1	1	123	14.1	9.57	High	High	High	High		1.02	99.009	100.991	98	100	102	100	16.783	0	57.17	4	749	4
FALSE	High	IsMasterProtein	ch12i_O75390	Citrate synthase, mitochondrial OS=Homo sapiens GN=CS PE=1 SV=2	0	59.63	16.5236	7	70	4	1	466	51.7	8.32	High	High	High	High		0.944	102.857	97.1427	104.4	101.4	95.6	98.6	3.062	4	66.56	7	1124	7
FALSE	High	IsMasterProtein	ch09u_Q9BTG3	CIZ1 protein OS=Homo sapiens GN=CIZ1 PE=1 SV=1	0	33.825	13.0227	6	19	6	1	837	92.7	5.91	Not Found	Not Found	High	High		100		200			200	200	0.425	0	25.35	5	193	6
FALSE	High	IsMasterProtein	A0A087X2D8	C-Jun-amino-terminal kinase-interacting protein 4 OS=Homo sapiens GN=SPAG9 PE=1 SV=1	0	268.574	20.0457	17	130	1	1	1312	145.1	5.17	Not Found	Not Found	Not Found	High									1.728	0	186	17	3073	17
FALSE	High	IsMasterProtein	ch17i_O60271	C-Jun-amino-terminal kinase-interacting protein 4 OS=Homo sapiens GN=SPAG9 PE=1 SV=4	0	280.71	19.8335	17	136	1	1	1321	146.1	5.15	High	High	High	High		1.598	76.995	123.005	78	76	122	124	1.774	19	194.23	17	3272	17
FALSE	High	IsMasterProtein	ch01u_Q9HAW4	Claspin OS=Homo sapiens GN=CLSPN PE=1 SV=3	0	12.649	2.46453	2	8	2	1	1339	151	4.82	Not Found	Not Found	High	High		100		200			200	200	0.073	0	8.81	2	148	2
FALSE	High	IsMasterProtein	ch17i_J3KRF5	Clathrin heavy chain 1 (Fragment) OS=Homo sapiens GN=CLTC PE=1 SV=1	0	48.208	21.374	4	74	1	1	131	15.6	5.24	High	High	High	High	Acetyl [N-Term]	0.01	200			200			9	0	82.43	3	1723	4
FALSE	High	IsMasterProtein	ch17u_A0A087WVQ6	Clathrin heavy chain OS=Homo sapiens GN=CLTC PE=1 SV=1	0	1484.41	48.5408	68	1046	65	1	1679	191.9	5.69	High	High	High	High	Acetyl [N-Term]	1.22	90.094	109.906	91	89.2	109	110.8	123.376	4	1523.35	67	25425	67
FALSE	High	IsMasterProtein	ch05u_H0YD52	Clathrin interactor 1 (Fragment) OS=Homo sapiens GN=CLINT1 PE=1 SV=1	0	17.697	10.5263	2	6	1	1	133	13.2	4.28	High	Not Found	Peak Found	Not Found	Acetyl [N-Term]								20.544	0			85	2
FALSE	High	IsMasterProtein	A0A0S2Z5H3	Clathrin interactor 1 isoform 2 (Fragment) OS=Homo sapiens GN=CLINT1 PE=2 SV=1	0	121.432	15.7076	11	79	10	1	643	70.3	6.58	High	High	High	High		1.644	75.654	124.346	73.6	77.7	126.4	122.3	7.377	2	93.19	11	1176	11
FALSE	High	IsMasterProtein	ch05i_P09497	Clathrin light chain B OS=Homo sapiens GN=CLTB PE=1 SV=1	0	11.529	7.86026	2	12	2	1	229	25.2	4.64	High	High	High	High		1.337	85.5929	114.407	86	85.2	114	114.8	1.512	0	12.43	2	151	2
FALSE	High	IsMasterProtein	chXi_P57739	Claudin-2 OS=Homo sapiens GN=CLDN2 PE=1 SV=1	0	13.971	6.52174	1	4	1	1	230	24.5	8.16	Not Found	Not Found	High	Not Found		100		200			200		0.668	0	5.35	1	105	1
FALSE	High	IsMasterProtein	A0A024R6H0	Cleavage and polyadenylation specific factor 2, 100kDa, isoform CRA_a OS=Homo sapiens GN=CPSF2 PE=4 SV=1	0	73.324	16.7519	10	40	10	1	782	88.4	5.11	High	High	High	High		4.79	34.5434	165.457	31.3	37.7	168.7	162.3	1.047	0	50.93	10	751	10
FALSE	High	IsMasterProtein	ch08i_Q10570	Cleavage and polyadenylation specificity factor subunit 1 OS=Homo sapiens GN=CPSF1 PE=1 SV=2	0	99.279	9.97921	11	68	11	1	1443	160.8	6.4	High	High	High	High		1.158	92.6775	107.322	94	91.4	106	108.6	0.663	0	51.21	11	1030	11
FALSE	High	IsMasterProtein	ch02i_Q9UKF6	Cleavage and polyadenylation specificity factor subunit 3 OS=Homo sapiens GN=CPSF3 PE=1 SV=1	0	110.012	17.6901	8	53	8	1	684	77.4	5.6	High	High	High	High	Acetyl [N-Term]	2.687	54.2408	145.759	54	54.5	146	145.5	1.801	0	54.68	7	854	8
FALSE	High	IsMasterProtein	ch07i_O95639	Cleavage and polyadenylation specificity factor subunit 4 OS=Homo sapiens GN=CPSF4 PE=1 SV=1	0	12.777	8.55019	2	10	2	1	269	30.2	8.31	High	High	High	High		1.419	82.665	117.335	87.2	78.1	112.8	121.9	0.438	0	7.13	2	157	2
FALSE	High	IsMasterProtein	Q05048	Cleavage stimulation factor subunit 1 OS=Homo sapiens GN=CSTF1 PE=1 SV=1	0	82.922	17.8654	6	48	6	1	431	48.3	6.58	High	High	High	High		1.116	94.5315	105.469	93.3	95.8	106.7	104.2	3.806	0	54.76	6	663	6
FALSE	High	IsMasterProtein	Q12996	Cleavage stimulation factor subunit 3 OS=Homo sapiens GN=CSTF3 PE=1 SV=1	0	146.582	23.152	13	77	13	1	717	82.9	8.12	High	High	High	High	Acetyl [N-Term]	1.179	91.7869	108.213	91.9	91.7	108.1	108.3	2.639	0	101.76	12	1539	13
FALSE	High	IsMasterProtein	ch19u_O96005	Cleft lip and palate transmembrane protein 1 OS=Homo sapiens GN=CLPTM1 PE=1 SV=1	0	101.263	11.3602	3	42	3	1	669	76	6.3	High	High	High	High		3.112	48.6355	151.365	46.8	50.4	153.2	149.6	0.995	0	56.42	3	1322	3
FALSE	High	IsMasterProtein	ch05i_Q96KA5	Cleft lip and palate transmembrane protein 1-like protein OS=Homo sapiens GN=CLPTM1L PE=1 SV=1	0.001	4.318	2.04461	1	4	1	1	538	62.2	8.56	Not Found	Peak Found	High	High		5.104	32.7652	167.235		32.8		167.2	0.086	0	3.61	1	28	1
FALSE	High	IsMasterProtein	Q7Z460	CLIP-associating protein 1 OS=Homo sapiens GN=CLASP1 PE=1 SV=1	0	126.187	13.8492	15	72	1	1	1538	169.3	9.03	Peak Found	Peak Found	High	High		1.978	67.1588	132.841	67.9	66.4	132.1	133.6	0.656	15	77.06	15	1106	15
FALSE	High	IsMasterProtein	ch03i_E3W994	CLIP-associating protein 2 OS=Homo sapiens GN=CLASP2 PE=1 SV=2	0	75.558	13.4328	10	38	9	1	1273	138.8	8.34	High	High	High	High		1.528	79.1219	120.878	71.1	87.1	128.9	112.9	0.389	0	43.68	9	552	10
FALSE	High	IsMasterProtein	A0A024R5X7	ClpX caseinolytic peptidase X homolog (E. coli), isoform CRA_a OS=Homo sapiens GN=CLPX PE=4 SV=1	0	135.69	32.5434	16	84	16	1	633	69.2	7.58	High	High	High	High		2.89	51.4096	148.59	52.3	50.5	147.7	149.5	2.332	0	110.17	16	1301	16
FALSE	High	IsMasterProtein	ch17u_I3L2B0	Clustered mitochondria protein homolog (Fragment) OS=Homo sapiens GN=CLUH PE=1 SV=2	0	223.236	25	20	130	1	1	1236	138.1	6.04	High	High	Peak Found	Peak Found		2.166	63.1643	136.836	63.5	62.8	136.5	137.2	2.016	0	163.68	20	2631	20
FALSE	High	IsMasterProtein	O75153	Clustered mitochondria protein homolog OS=Homo sapiens GN=CLUH PE=1 SV=2	0	222.48	24.217	21	132	2	1	1309	146.6	6.13	Peak Found	Peak Found	High	High		2.148	63.5425	136.458	64.2	62.9	135.8	137.1	1.894	17	160.66	21	2567	21
FALSE	High	IsMasterProtein	J3KNW5	Clusterin-associated protein 1 OS=Homo sapiens GN=CLUAP1 PE=1 SV=1	0	6.863	3.7037	1	2	1	1	432	50.1	4.84	Peak Found	Not Found	High	Not Found									0.096	0	2.25	1	23	1
FALSE	High	IsMasterProtein	Q8IY22	C-Maf-inducing protein OS=Homo sapiens GN=CMIP PE=1 SV=3	0	27.012	9.05563	5	18	5	1	773	86.3	6.7	Not Found	Peak Found	High	High		100	1.42243	199.289		1.4	200	198.6	0.334	0	21.55	5	351	5
FALSE	High	IsMasterProtein	ch15i_A0A0U1RR27	C-myc promoter-binding protein OS=Homo sapiens GN=DENND4A PE=1 SV=1	0.008	2.311	0.678497	1	2	1	1	1916	214.7	7.09	Peak Found	Not Found	High	Not Found		3.535	44.0976	155.902	44.1		155.9		0.022	0	1.93	1	19	1
FALSE	High	IsMasterProtein	Q14019	Coactosin-like protein OS=Homo sapiens GN=COTL1 PE=1 SV=3	0	78.342	43.662	7	76	7	1	142	15.9	5.67	High	High	High	High		1.283	87.6131	112.387	87.7	87.5	112.3	112.5	38.811	0	90.7	7	1180	7
FALSE	High	IsMasterProtein	ch19i_M0QXB4	Coatomer protein complex, subunit epsilon, isoform CRA_g OS=Homo sapiens GN=COPE PE=1 SV=1	0	184.897	33.5347	7	81	7	1	331	36.9	5.16	High	High	High	High		1.382	83.9472	116.053	84	83.9	116	116.1	11.452	0	106.35	6	2537	7
FALSE	High	IsMasterProtein	P53618	Coatomer subunit beta OS=Homo sapiens GN=COPB1 PE=1 SV=3	0	309.968	27.2823	17	156	17	1	953	107.1	6.05	High	High	High	High	Acetyl [N-Term]	1.325	86.0261	113.974	85.7	86.3	114.3	113.7	4.456	0	204.15	15	3048	17
FALSE	High	IsMasterProtein	ch03u_P35606	Coatomer subunit beta' OS=Homo sapiens GN=COPB2 PE=1 SV=2	0	330.232	35.9823	20	183	20	1	906	102.4	5.27	High	High	High	High		1.235	89.483	110.517	88.9	90.1	111.1	109.9	5.362	0	221.98	20	3810	20
FALSE	High	IsMasterProtein	ch03u_Q9Y678	Coatomer subunit gamma-1 OS=Homo sapiens GN=COPG1 PE=1 SV=1	0	419.409	44.2792	27	260	26	1	874	97.7	5.47	High	High	High	High		1.331	85.7923	114.208	86	85.6	114	114.4	13.896	1	319.91	27	5582	27
FALSE	High	IsMasterProtein	Q9UBF2	Coatomer subunit gamma-2 OS=Homo sapiens GN=COPG2 PE=1 SV=1	0	167.692	22.8473	13	88	12	1	871	97.6	5.81	High	High	High	High		1.126	94.0903	105.91	94.1	94.1	105.9	105.9	2.162	0	129.67	13	2236	13
FALSE	High	IsMasterProtein	ch12i_F8VVA7	Coatomer subunit zeta-1 OS=Homo sapiens GN=COPZ1 PE=1 SV=1	0	114.815	37.3737	6	67	4	1	198	22.3	4.89	High	High	High	High	Acetyl [N-Term]	1.54	78.7434	121.257	78.6	78.9	121.4	121.1	58.948	4	93.58	6	1519	6
FALSE	High	IsMasterProtein	F8VYK5	Coatomer subunit zeta-1 OS=Homo sapiens GN=COPZ1 PE=1 SV=1	0	73.182	46.0674	3	28	1	1	89	10	4.93	Not Found	Not Found	Not Found	Not Found									999	0	49.16	2	869	3
FALSE	High	IsMasterProtein	ch02u_Q8IUF1	COBW domain-containing protein 2 OS=Homo sapiens GN=CBWD2 PE=2 SV=1	0	15.457	10.1266	3	8	3	1	395	44	4.89	Peak Found	Peak Found	High	High		4.339	37.4592	162.541	38.3	36.6	161.7	163.4	0.35	0	10.83	3	124	3
FALSE	High	IsMasterProtein	ch15i_Q8IWY9	Codanin-1 OS=Homo sapiens GN=CDAN1 PE=1 SV=4	0	7.565	1.38549	1	2	1	1	1227	134	6.77	Not Found	Not Found	Not Found	High									0.038	0	2.05	1	58	1
FALSE	High	IsMasterProtein	P23528	Cofilin-1 OS=Homo sapiens GN=CFL1 PE=1 SV=3	0	502.671	69.8795	16	636	12	1	166	18.5	8.09	High	High	High	High	Acetyl [N-Term]	1.288	87.4051	112.595	89.2	85.6	110.8	114.4	316227	6	895.27	15	13850	16
FALSE	High	IsMasterProtein	ch14i_Q9Y281	Cofilin-2 OS=Homo sapiens GN=CFL2 PE=1 SV=1	0	184.901	58.4337	10	151	6	1	166	18.7	7.88	High	High	High	High	Acetyl [N-Term]	1.255	88.6829	111.317	88.7	88.7	111.3	111.3	82.768	0	216.27	9	3699	10
FALSE	High	IsMasterProtein	ch19u_Q6P1N0	Coiled-coil and C2 domain-containing protein 1A OS=Homo sapiens GN=CC2D1A PE=1 SV=1	0	19.535	4.94217	3	8	3	1	951	104	8.09	Not Found	High	High	High		3.716	47.4358	176.282		47.4	200	152.6	0.172	0	7.28	3	151	3
FALSE	High	IsMasterProtein	ch03u_J3KR35	Coiled-coil domain containing 12, isoform CRA_a OS=Homo sapiens GN=CCDC12 PE=1 SV=1	0	43.961	30.1676	3	20	3	1	179	20.5	8.47	High	High	High	High		3.336	46.1272	153.873	44.2	48.1	155.8	151.9	2.511	0	26.36	3	332	3
FALSE	High	IsMasterProtein	A0A024QZJ7	Coiled-coil domain containing 6, isoform CRA_a OS=Homo sapiens GN=CCDC6 PE=4 SV=1	0	63.089	17.7215	5	32	5	1	474	53.3	7.34	High	High	High	High		1.681	74.6029	125.397	69.9	79.3	130.1	120.7	1.089	0	47.19	5	817	5
FALSE	High	IsMasterProtein	ch19i_Q96CT7	Coiled-coil domain-containing protein 124 OS=Homo sapiens GN=CCDC124 PE=1 SV=1	0	66.201	20.1794	4	38	4	1	223	25.8	9.54	High	High	High	High		2.026	66.0836	133.916	65.6	66.5	134.4	133.5	2.981	0	58.58	4	881	4
FALSE	Medium	IsMasterProtein	Q96BQ5	Coiled-coil domain-containing protein 127 OS=Homo sapiens GN=CCDC127 PE=1 SV=1	0.013	1.821	5.76923	1	1	1	1	260	30.8	9.2	Not Found	Not Found	Not Found	Not Found									0	0	0	1
FALSE	High	IsMasterProtein	Q9H6E4	Coiled-coil domain-containing protein 134 OS=Homo sapiens GN=CCDC134 PE=1 SV=1	0	10.347	13.9738	2	3	2	1	229	26.5	8.85	Peak Found	Not Found	High	Not Found		1.707	73.8867	126.113	73.9		126.1		0.468	0	3.32	2	79	1
FALSE	High	IsMasterProtein	Q96M89	Coiled-coil domain-containing protein 138 OS=Homo sapiens GN=CCDC138 PE=1 SV=1	0	6.53	2.85714	1	2	1	1	665	76.2	8.53	Not Found	Not Found	High	Not Found		100		200			200		0.051	0	2.4	1	37	1
FALSE	High	IsMasterProtein	ch06u_Q9P0B6	Coiled-coil domain-containing protein 167 OS=Homo sapiens GN=CCDC167 PE=1 SV=2	0	6.714	15.4639	1	4	1	1	97	11.5	9.5	Not Found	Not Found	High	High		100		200				200	0.468	0	5.06	1	99	1
FALSE	Medium	IsMasterProtein	ch09i_H0Y701	Coiled-coil domain-containing protein 171 (Fragment) OS=Homo sapiens GN=CCDC171 PE=1 SV=2	0.031	0.886	1.27932	1	3	1	1	469	53.2	8.87	Not Found	Not Found	High	Not Found		100		200			200		0.066	0	0	1	0	1
FALSE	High	IsMasterProtein	O60826	Coiled-coil domain-containing protein 22 OS=Homo sapiens GN=CCDC22 PE=1 SV=1	0	127.122	28.2297	12	58	12	1	627	70.7	6.74	High	High	High	High		1.505	79.8418	120.158	79.2	80.5	120.8	119.5	1.766	0	84.97	12	1052	12
FALSE	High	IsMasterProtein	ch17u_Q96A33	Coiled-coil domain-containing protein 47 OS=Homo sapiens GN=CCDC47 PE=1 SV=1	0	67.067	10.352	5	32	5	1	483	55.8	4.87	High	High	High	High		1.532	79.0009	120.999	77.9	80.1	122.1	119.9	1.721	0	45.2	5	713	5
FALSE	High	IsMasterProtein	Q96ER9	Coiled-coil domain-containing protein 51 OS=Homo sapiens GN=CCDC51 PE=1 SV=2	0	26.301	8.0292	2	9	2	1	411	45.8	8.19	High	High	High	High		1.029	98.5574	101.443	99.7	97.4	100.3	102.6	0.269	0	17.91	1	290	2
FALSE	High	IsMasterProtein	Q4VC31	Coiled-coil domain-containing protein 58 OS=Homo sapiens GN=CCDC58 PE=1 SV=1	0	77.542	33.3333	4	30	4	1	144	16.6	7.81	High	High	High	High	Acetyl [N-Term]	1.034	98.3482	101.652	97.3	99.4	102.7	100.6	30.623	0	27.37	3	786	4
FALSE	High	IsMasterProtein	A2RUB6	Coiled-coil domain-containing protein 66 OS=Homo sapiens GN=CCDC66 PE=1 SV=4	0.009	2.184	1.47679	1	2	1	1	948	109.3	8.25	High	High	Peak Found	Peak Found		1.011	99.4614	100.539	105.9	93	94.1	107	0.036	0			19	1
FALSE	High	IsMasterProtein	Q9BR77	Coiled-coil domain-containing protein 77 OS=Homo sapiens GN=CCDC77 PE=2 SV=1	0	6.508	4.30328	1	4	1	1	488	57.5	8.72	Not Found	Not Found	High	High		100		200			200	200	0.072	0	6.88	1	131	1
FALSE	High	IsMasterProtein	ch14u_A6NKD9	Coiled-coil domain-containing protein 85C OS=Homo sapiens GN=CCDC85C PE=1 SV=1	0	27.758	11.9332	3	14	3	1	419	45.2	6.96	Not Found	Peak Found	High	High		2.794	60.7077	169.646		60.7	200	139.3	0.551	0	17.06	3	375	3
FALSE	High	IsMasterProtein	Q9H6F5	Coiled-coil domain-containing protein 86 OS=Homo sapiens GN=CCDC86 PE=1 SV=1	0	52.901	20.5556	4	36	4	1	360	40.2	10.33	High	High	High	High		3.815	41.5394	158.461	41	42.1	159	157.9	1.154	0	55.36	4	446	4
FALSE	High	IsMasterProtein	ch19u_Q9Y3X0	Coiled-coil domain-containing protein 9 OS=Homo sapiens GN=CCDC9 PE=1 SV=1	0	20.155	5.83804	2	12	2	1	531	59.7	5.4	High	High	High	High		1.18	91.7465	108.253	89.8	93.7	110.2	106.3	0.359	0	17.46	2	277	2
FALSE	High	IsMasterProtein	ch02u_Q567U6	Coiled-coil domain-containing protein 93 OS=Homo sapiens GN=CCDC93 PE=1 SV=2	0	35.85	9.82567	5	22	5	1	631	73.2	8.15	High	High	High	High		1.375	84.212	115.788	85.3	83.1	114.7	116.9	0.455	0	23.04	5	346	5
FALSE	High	IsMasterProtein	ch19i_Q9BW85	Coiled-coil domain-containing protein 94 OS=Homo sapiens GN=CCDC94 PE=1 SV=1	0	28.418	18.8854	3	36	3	1	323	37.1	5.92	High	High	High	High		2.498	57.1684	142.832	55.1	59.2	144.9	140.8	0.968	0	10.49	3	291	3
FALSE	High	IsMasterProtein	A0A024R2F8	Coiled-coil-helix-coiled-coil-helix domain containing 4, isoform CRA_b OS=Homo sapiens GN=CHCHD4 PE=4 SV=1	0	62.623	36.129	4	26	4	1	155	17.4	4.39	High	High	High	High		1	100.005	99.9946	100.6	99.4	99.4	100.6	6.743	0	40.52	4	614	4
FALSE	High	IsMasterProtein	A0A024R5J6	Coiled-coil-helix-coiled-coil-helix domain containing 8, isoform CRA_a OS=Homo sapiens GN=CHCHD8 PE=4 SV=1	0	40.022	34.4828	4	13	4	1	87	10.1	6.04	Not Found	High	High	High	Acetyl [N-Term]	15.008	12.8967	193.552		12.9	200	187.1	6.197	0	14.74	3	299	4
FALSE	High	IsMasterProtein	ch10u_Q96BP2	Coiled-coil-helix-coiled-coil-helix domain-containing protein 1 OS=Homo sapiens GN=CHCHD1 PE=1 SV=1	0	15.802	13.5593	1	8	1	1	118	13.5	10.21	High	High	High	High		4.378	37.1868	162.813	36.6	37.8	163.4	162.2	1.154	0	10.84	1	120	1
FALSE	High	IsMasterProtein	ch22u_B5MBW9	Coiled-coil-helix-coiled-coil-helix domain-containing protein 10, mitochondrial OS=Homo sapiens GN=CHCHD10 PE=1 SV=1	0	11.474	15.4362	1	4	1	1	149	14.9	7.84	Not Found	Not Found	High	High		100		200			200	200	2.162	0	6.07	1	199	1
FALSE	High	IsMasterProtein	ch07i_Q9Y6H1	Coiled-coil-helix-coiled-coil-helix domain-containing protein 2 OS=Homo sapiens GN=CHCHD2 PE=1 SV=1	0	56.137	33.7748	3	44	3	1	151	15.5	9.22	High	High	High	High		27.516	7.01369	192.986	7.2	6.8	192.8	193.2	24.119	0	63.82	3	1108	3
FALSE	High	IsMasterProtein	P38432	Coilin OS=Homo sapiens GN=COIL PE=1 SV=1	0	54.456	16.1458	6	32	6	1	576	62.6	9.07	High	High	High	High		2.324	60.166	139.834	59.5	60.8	140.5	139.2	0.808	0	39.16	6	650	6
FALSE	High	IsMasterProtein	ch19u_D6W5Y5	Cold inducible RNA binding protein, isoform CRA_c OS=Homo sapiens GN=CIRBP PE=1 SV=1	0	57.872	15.4882	3	44	3	1	297	31.9	9.61	High	High	High	High		1.695	74.2241	125.776	74	74.4	126	125.6	1.512	0	51.85	3	1206	3
FALSE	High	IsMasterProtein	ch01i_O75534	Cold shock domain-containing protein E1 OS=Homo sapiens GN=CSDE1 PE=1 SV=2	0	303.88	35.7143	24	196	20	1	798	88.8	6.25	High	High	High	High	Acetyl [N-Term]	2.648	54.8187	145.181	53.8	55.8	146.2	144.2	6.197	8	233.45	23	3747	24
FALSE	High	IsMasterProtein	ch03u_Q02388	Collagen alpha-1(VII) chain OS=Homo sapiens GN=COL7A1 PE=1 SV=2	0	8.179	0.849185	2	6	2	1	2944	295	6.27	Not Found	Not Found	High	High		100		200			200	200	0.026	0	7.3	2	139	2
FALSE	High	IsMasterProtein	ch21i_P39060	Collagen alpha-1(XVIII) chain OS=Homo sapiens GN=COL18A1 PE=1 SV=5	0	26.786	4.84607	3	10	3	1	1754	178.1	6.01	Not Found	Not Found	High	High		100		200			200	200	0.127	0	4.32	2	116	3
FALSE	Medium	IsMasterProtein	Q8NFW1	Collagen alpha-1(XXII) chain OS=Homo sapiens GN=COL22A1 PE=2 SV=2	0.048	0.731	1.16851	1	1	1	1	1626	161	7.23	Not Found	Not Found	Not Found	Not Found									0.025	0			0	1
FALSE	Medium	IsMasterProtein	ch05i_Q86Y22	Collagen alpha-1(XXIII) chain OS=Homo sapiens GN=COL23A1 PE=1 SV=1	0.02	1.318	3.88889	1	2	1	1	540	51.9	7.25	Not Found	Not Found	Not Found	Not Found									0.066	0	0	1	0	1
FALSE	High	IsMasterProtein	P08572	Collagen alpha-2(IV) chain OS=Homo sapiens GN=COL4A2 PE=1 SV=4	0	12.387	1.46028	2	6	2	1	1712	167.4	8.66	Peak Found	Peak Found	High	High		21.04	9.07426	190.926	9.5	8.7	190.5	191.3	0.048	0	7.25	2	141	2
FALSE	High	IsMasterProtein	Q53FR9	COMM domain containing 9 variant (Fragment) OS=Homo sapiens GN=COMMD9 PE=2 SV=1	0	41.887	29.798	3	20	3	1	198	21.8	5.88	High	High	High	High		1.859	69.9581	130.042	67.5	72.4	132.5	127.6	2.162	0	24.67	3	216	3
FALSE	High	IsMasterProtein	ch02u_Q8N668	COMM domain-containing protein 1 OS=Homo sapiens GN=COMMD1 PE=1 SV=1	0	45.004	45.7895	4	22	4	1	190	21.2	6.2	High	High	High	High	Acetyl [N-Term]	1.754	72.614	127.386	70.4	74.9	129.6	125.1	5.31	0	16.76	3	438	4
FALSE	High	IsMasterProtein	ch03u_Q86X83	COMM domain-containing protein 2 OS=Homo sapiens GN=COMMD2 PE=1 SV=2	0	10.748	9.54774	1	4	1	1	199	22.7	6.73	Peak Found	Peak Found	High	High		1.377	84.1343	115.866	84.7	83.6	115.3	116.4	0.212	0	7.27	1	145	1
FALSE	High	IsMasterProtein	ch10i_Q9UBI1	COMM domain-containing protein 3 OS=Homo sapiens GN=COMMD3 PE=1 SV=1	0	49.569	36.9231	5	25	1	1	195	22.1	5.99	Not Found	Not Found	High	High									3.125	0	32.53	5	648	5
FALSE	High	IsMasterProtein	ch15i_H3BM91	COMM domain-containing protein 4 (Fragment) OS=Homo sapiens GN=COMMD4 PE=1 SV=1	0	59.74	18.4834	2	20	2	1	211	22.7	7.9	High	High	High	High		1.937	68.0876	131.912	68.7	67.5	131.3	132.5	1.894	0	29.28	2	657	2
FALSE	High	IsMasterProtein	Q9GZQ3	COMM domain-containing protein 5 OS=Homo sapiens GN=COMMD5 PE=1 SV=1	0	13.209	14.2857	2	5	2	1	224	24.7	7.02	High	High	Peak Found	Peak Found	Acetyl [N-Term]	1.512	79.6266	120.373	80.5	78.8	119.5	121.2	0.468	0	5.65	1	143	2
FALSE	High	IsMasterProtein	ch04u_Q9NX08	COMM domain-containing protein 8 OS=Homo sapiens GN=COMMD8 PE=1 SV=1	0	10.716	9.83607	1	2	1	1	183	21.1	5.43	Not Found	Peak Found	Not Found	High		1.734	73.149	126.851		73.1		126.9	0.233	0	3.26	1	97	1
FALSE	High	IsMasterProtein	ch17i_Q07021	Complement component 1 Q subcomponent-binding protein, mitochondrial OS=Homo sapiens GN=C1QBP PE=1 SV=1	0	186.37	44.3262	9	138	2	1	282	31.3	4.84	High	High	High	High		1.061	97.0483	102.952	96.8	97.3	103.2	102.7	24.119	11	199.03	9	3303	9
FALSE	High	IsMasterProtein	ch17i_I3L3B0	Complement component 1 Q subcomponent-binding protein, mitochondrial OS=Homo sapiens GN=C1QBP PE=1 SV=1	0	167.568	62.3596	8	123	1	1	178	20.1	4.22	High	High	Peak Found	Peak Found		0.922	104.036	95.9639	104.9	103.2	95.1	96.8	516.947	0	166.97	7	2992	8
FALSE	Medium	IsMasterProtein	ch06i_H7C5H1	Complement factor B (Fragment) OS=Homo sapiens GN=CFB PE=1 SV=1	0.022	1.189	6.22951	1	3	1	1	305	34.7	7.06	Not Found	Not Found	Not Found	Not Found	Acetyl [N-Term]								0	0			0	1
FALSE	High	IsMasterProtein	Q9NPL8	Complex I assembly factor TIMMDC1, mitochondrial OS=Homo sapiens GN=TIMMDC1 PE=1 SV=2	0	54.142	20	5	38	5	1	285	32.2	8.5	High	High	High	High		2.301	60.5966	139.403	59.3	61.9	140.7	138.1	2.162	0	37.33	5	575	5
FALSE	High	IsMasterProtein	ch05u_Q5U5X0	Complex III assembly factor LYRM7 OS=Homo sapiens GN=LYRM7 PE=1 SV=1	0	42.197	40.3846	3	20	3	1	104	11.9	9.66	High	High	High	High		1.918	68.5479	131.452	71.4	65.7	128.6	134.3	6.499	0	29.81	3	334	3
FALSE	High	IsMasterProtein	Q6PUV4	Complexin-2 OS=Homo sapiens GN=CPLX2 PE=2 SV=2	0	130.029	29.1045	3	70	3	1	134	15.4	5.08	High	High	High	High		2.701	54.0428	145.957	53.8	54.3	146.2	145.7	55.234	0	117.45	3	1799	3
FALSE	High	IsMasterProtein	B1ALW7	Component of oligomeric golgi complex 2, isoform CRA_a OS=Homo sapiens GN=COG2 PE=2 SV=1	0	22.407	11.1111	5	12	5	1	738	83.2	6.62	Not Found	High	Not Found	High		1.417	82.7366	117.263		82.7		117.3	0.278	0	15.92	5	202	5
FALSE	High	IsMasterProtein	A0A024QZ89	Component of oligomeric golgi complex 4, isoform CRA_d OS=Homo sapiens GN=COG4 PE=4 SV=1	0	63.647	11.2801	6	30	6	1	789	89.5	5.21	High	High	High	High		1.737	73.0646	126.935	75.7	70.4	124.3	129.6	0.478	0	45.51	6	687	6
FALSE	High	IsMasterProtein	A0A0S2Z652	Component of oligomeric golgi complex 7 isoform 1 (Fragment) OS=Homo sapiens GN=COG7 PE=2 SV=1	0	30.496	10.3896	6	20	6	1	770	86.3	5.47	High	High	High	High		1.169	92.1916	107.808	121	63.4	79	136.6	0.535	0	14.79	6	143	6
FALSE	High	IsMasterProtein	ch12u_Q15021	Condensin complex subunit 1 OS=Homo sapiens GN=NCAPD2 PE=1 SV=3	0	260.118	29.4789	27	135	27	1	1401	157.1	6.61	High	High	High	High		2.075	65.0464	134.954	64.4	65.7	135.6	134.3	1.855	0	161.34	27	2282	27
FALSE	High	IsMasterProtein	A8K4T8	Condensin complex subunit 2 OS=Homo sapiens PE=2 SV=1	0	150.651	15.3846	8	58	8	1	741	82.5	5.06	High	High	High	High		1.894	69.1035	130.896	68.9	69.3	131.1	130.7	1.801	0	88.58	8	1511	8
FALSE	High	IsMasterProtein	ch04i_Q9BPX3	Condensin complex subunit 3 OS=Homo sapiens GN=NCAPG PE=1 SV=1	0	190.492	20.3941	14	80	14	1	1015	114.3	5.59	High	High	High	High		1.683	74.5386	125.461	74.6	74.5	125.4	125.5	1.683	0	103.66	14	2099	14
FALSE	High	IsMasterProtein	P42695	Condensin-2 complex subunit D3 OS=Homo sapiens GN=NCAPD3 PE=1 SV=2	0	37.406	3.73832	5	20	5	1	1498	168.8	7.5	Peak Found	Peak Found	High	High		6.594	26.335	173.665	18.5	34.1	181.5	165.9	0.181	0	16.98	5	387	5
FALSE	High	IsMasterProtein	ch17u_Q8WTW3	Conserved oligomeric Golgi complex subunit 1 OS=Homo sapiens GN=COG1 PE=1 SV=1	0	75.426	11.7347	6	22	6	1	980	108.9	7.31	High	High	High	High		1.311	86.5382	113.462	95.4	77.7	104.6	122.3	0.369	0	31.65	6	648	6
FALSE	High	IsMasterProtein	ch13u_Q96JB2	Conserved oligomeric Golgi complex subunit 3 OS=Homo sapiens GN=COG3 PE=1 SV=3	0	50.954	12.6812	7	21	7	1	828	94	5.57	High	High	High	High	Acetyl [N-Term]	1.172	92.0833	107.917	89.4	94.8	110.6	105.2	0.49	0	16.93	6	399	6
FALSE	High	IsMasterProtein	ch12i_Q12860	Contactin-1 OS=Homo sapiens GN=CNTN1 PE=1 SV=1	0	27.494	5.10806	4	16	4	1	1018	113.2	5.9	High	Peak Found	High	High		13.92	13.4052	186.595	17.9	8.9	182.1	191.1	0.204	0	20.41	4	264	4
FALSE	Medium	IsMasterProtein	E9PDN6	Contactin-associated protein-like 4 OS=Homo sapiens GN=CNTNAP4 PE=1 SV=1	0.025	1.066	0.991609	1	2	1	1	1311	145.5	6.6	Not Found	Not Found	Not Found	Not Found									0.034	0	0	1	16	1
FALSE	High	IsMasterProtein	Q9NQ92	Coordinator of PRMT5 and differentiation stimulator OS=Homo sapiens GN=COPRS PE=1 SV=3	0	13.149	18.4783	2	6	2	1	184	20.1	4.18	Not Found	Peak Found	High	High	Acetyl [N-Term]	14.509	13.3257	193.337		13.3	200	186.7	0.931	0	8.02	2	170	2
FALSE	High	IsMasterProtein	Q59EL2	COP9 constitutive photomorphogenic homolog subunit 2 variant (Fragment) OS=Homo sapiens PE=2 SV=1	0	100.562	21.9512	8	72	8	1	451	52.5	5.54	High	High	High	High		1.252	88.8158	111.184	90	87.7	110	112.3	4.055	0	85.55	8	1229	8
FALSE	High	IsMasterProtein	ch17i_Q9UNS2	COP9 signalosome complex subunit 3 OS=Homo sapiens GN=COPS3 PE=1 SV=3	0	72.045	11.1111	3	26	3	1	423	47.8	6.65	High	High	High	High	Acetyl [N-Term]	1.504	79.8811	120.119	82.6	77.1	117.4	122.9	0.978	0	29.27	2	1072	3
FALSE	High	IsMasterProtein	D6RFN0	COP9 signalosome complex subunit 4 OS=Homo sapiens GN=COPS4 PE=1 SV=1	0	169.145	39.726	12	108	12	1	438	49.7	5.81	High	High	High	High		1.262	88.4096	111.59	88.8	88	111.2	112	6.88	0	126.07	12	1895	12
FALSE	High	IsMasterProtein	ch08i_Q92905	COP9 signalosome complex subunit 5 OS=Homo sapiens GN=COPS5 PE=1 SV=4	0	46.888	17.9641	3	28	3	1	334	37.6	6.54	High	High	High	High		1.412	82.9174	117.083	83	82.9	117	117.1	1.512	0	31.27	3	333	3
FALSE	High	IsMasterProtein	ch07i_Q7L5N1	COP9 signalosome complex subunit 6 OS=Homo sapiens GN=COPS6 PE=1 SV=1	0	77.923	28.7462	6	50	6	1	327	36.1	5.73	High	High	High	High		1.361	84.7093	115.291	85.1	84.3	114.9	115.7	7.577	0	69.21	6	589	6
FALSE	High	IsMasterProtein	ch12u_Q9UBW8	COP9 signalosome complex subunit 7a OS=Homo sapiens GN=COPS7A PE=1 SV=1	0	91.663	34.1818	6	44	6	1	275	30.3	8.22	High	High	High	High		1.732	73.1961	126.804	71.8	74.6	128.2	125.4	4.08	0	64.76	6	1039	6
FALSE	High	IsMasterProtein	Q9H9Q2	COP9 signalosome complex subunit 7b OS=Homo sapiens GN=COPS7B PE=1 SV=1	0	96.794	39.0152	6	51	6	1	264	29.6	6.15	High	High	High	High	Acetyl [N-Term]	1.221	90.0691	109.931	92.3	87.8	107.7	112.2	11.115	0	53.33	5	1095	6
FALSE	High	IsMasterProtein	Q8WXC6	COP9 signalosome complex subunit 9 OS=Homo sapiens GN=COPS9 PE=1 SV=3	0.008	2.246	35.0877	1	8	1	1	57	6.2	3.83	Not Found	Not Found	Not Found	Not Found									2.162	0	4.65	1	195	1
FALSE	High	IsMasterProtein	A0A024R994	Copine III, isoform CRA_a OS=Homo sapiens GN=CPNE3 PE=4 SV=1	0	220.505	29.2365	12	120	12	1	537	60.1	5.85	High	High	High	High		1.302	86.8995	113.1	87.7	86.1	112.3	113.9	9.798	0	156.57	12	2689	12
FALSE	High	IsMasterProtein	ch20i_B0QZ18	Copine-1 OS=Homo sapiens GN=CPNE1 PE=1 SV=1	0	72.554	16.9742	6	34	6	1	542	59.7	6.04	High	High	High	High		2.248	61.5822	138.418	61.6	61.6	138.4	138.4	1.371	0	45.63	6	926	6
FALSE	High	IsMasterProtein	ch11u_O14618	Copper chaperone for superoxide dismutase OS=Homo sapiens GN=CCS PE=1 SV=1	0	21.341	12.4088	3	14	3	1	274	29	5.58	High	High	High	High		2.425	58.402	141.598	55	61.8	145	138.2	0.778	0	14.5	3	329	3
FALSE	High	IsMasterProtein	ch10i_Q9NTM9	Copper homeostasis protein cutC homolog OS=Homo sapiens GN=CUTC PE=1 SV=1	0	9.997	6.59341	1	4	1	1	273	29.3	8.18	High	High	Peak Found	Peak Found		1.135	93.6913	106.309	92.6	94.7	107.4	105.3	0.155	0	6.69	1	153	1
FALSE	High	IsMasterProtein	ch05u_O00244	Copper transport protein ATOX1 OS=Homo sapiens GN=ATOX1 PE=1 SV=1	0	28.19	69.1176	3	38	3	1	68	7.4	7.24	High	High	High	High		1.49	80.3127	119.687	79.8	80.9	120.2	119.1	176.828	0	13.28	3	359	3
FALSE	High	IsMasterProtein	ch05u_O75367	Core histone macro-H2A.1 OS=Homo sapiens GN=H2AFY PE=1 SV=4	0	185.239	40.8602	10	126	8	1	372	39.6	9.79	High	High	High	High		1.068	96.6993	103.301	98.6	94.8	101.4	105.2	17.33	2	181.46	10	2617	10
FALSE	High	IsMasterProtein	Q9P0M6	Core histone macro-H2A.2 OS=Homo sapiens GN=H2AFY2 PE=1 SV=3	0	40.262	19.3548	4	20	2	1	372	40	9.69	High	High	High	High		1.232	89.6133	110.387	90.8	88.5	109.2	111.5	0.833	0	28.51	4	366	4
FALSE	High	IsMasterProtein	Q59G88	Coronin (Fragment) OS=Homo sapiens PE=3 SV=1	0	13.694	8.06452	2	4	2	1	558	59.6	8.13	Peak Found	Peak Found	High	High		0.956	102.231	97.7686		102.2		97.8	0.172	0	5.58	2	118	2
FALSE	High	IsMasterProtein	Q9BR76	Coronin-1B OS=Homo sapiens GN=CORO1B PE=1 SV=1	0	22.341	10.8384	3	14	3	1	489	54.2	5.88	High	High	High	High		1.604	76.808	123.192	76.1	77.5	123.9	122.5	0.318	0	18.41	3	418	3
FALSE	High	IsMasterProtein	ch06u_Q9P1F3	Costars family protein ABRACL OS=Homo sapiens GN=ABRACL PE=1 SV=1	0	16.895	53.0864	3	15	3	1	81	9.1	6.29	High	Peak Found	High	High		1.305	86.7576	113.242	91.3	82.2	108.7	117.8	16.783	0	12.36	3	254	3
FALSE	High	IsMasterProtein	ch15i_P24468	COUP transcription factor 2 OS=Homo sapiens GN=NR2F2 PE=1 SV=1	0	13.155	7.00483	2	6	2	1	414	45.5	8.28	Not Found	Peak Found	High	High		12.223	15.7201	192.14		15.7	200	184.3	0.245	0	6.95	2	146	2
FALSE	High	IsMasterProtein	ch16u_Q9NRP2	COX assembly mitochondrial protein 2 homolog OS=Homo sapiens GN=CMC2 PE=1 SV=1	0	6.126	25.3165	2	8	2	1	79	9.5	7.87	High	High	Peak Found	High		1.616	76.4468	123.553	78.1	74.8	121.9	125.2	2.162	0	3.31	2	36	2
FALSE	High	IsMasterProtein	Q7Z7K0	COX assembly mitochondrial protein homolog OS=Homo sapiens GN=CMC1 PE=1 SV=1	0	26.383	25.4717	2	11	2	1	106	12.5	8.63	High	High	High	High	Acetyl [N-Term]	1.232	89.5954	110.405	89.4	89.8	110.6	110.2	2.728	0	10.66	1	415	2
FALSE	High	IsMasterProtein	ch16u_Q9UEE9	Craniofacial development protein 1 OS=Homo sapiens GN=CFDP1 PE=1 SV=1	0	31.012	15.3846	3	18	3	1	299	33.6	4.81	High	Peak Found	High	High		2.988	50.1525	149.848	52.4	47.9	147.6	152.1	0.896	0	19.1	3	283	3
FALSE	High	IsMasterProtein	A0A0S2Z471	Creatine kinase brain isoform 2 (Fragment) OS=Homo sapiens GN=CKB PE=2 SV=1	0	6.329	3.20988	1	4	1	1	405	44.9	6.11	Not Found	Not Found	Not Found	Not Found									0.096	0	4.93	1	143	1
FALSE	High	IsMasterProtein	Q92793	CREB-binding protein OS=Homo sapiens GN=CREBBP PE=1 SV=3	0	66.93	5.85586	7	49	6	1	2442	265.2	8.53	High	High	High	High		7.38	23.867	176.133	19.8	27.9	180.2	172.1	0.274	1	45.19	7	908	7
FALSE	High	IsMasterProtein	Q53ET0	CREB-regulated transcription coactivator 2 OS=Homo sapiens GN=CRTC2 PE=1 SV=2	0	15.492	6.20491	2	4	2	1	693	73.3	7.11	Not Found	Not Found	Not Found	High	Acetyl [N-Term]	100		200				200	0.222	0	2.23	1	229	2
FALSE	High	IsMasterProtein	ch22u_P46109	Crk-like protein OS=Homo sapiens GN=CRKL PE=1 SV=1	0	108.495	26.0726	6	52	6	1	303	33.8	6.74	High	High	High	High		1.139	93.4923	106.508	93.3	93.7	106.7	106.3	5.158	0	74.28	6	1204	6
FALSE	High	IsMasterProtein	Q9BZJ0	Crooked neck-like protein 1 OS=Homo sapiens GN=CRNKL1 PE=1 SV=4	0	50.718	10.2594	7	26	7	1	848	100.4	8	High	High	High	High		6.342	27.2404	172.76	25.7	28.8	174.3	171.2	0.448	0	31.95	7	582	7
FALSE	High	IsMasterProtein	Q6IAZ5	CRSP9 protein OS=Homo sapiens GN=CRSP9 PE=1 SV=1	0	8.26	8.58369	1	2	1	1	233	27.2	5.78	Peak Found	Not Found	High	Not Found		4.015	39.8778	160.122	39.9		160.1		0.179	0	2.98	1	51	1
FALSE	High	IsMasterProtein	ch12i_Q16526	Cryptochrome-1 OS=Homo sapiens GN=CRY1 PE=1 SV=1	0	7.096	2.38908	1	4	1	1	586	66.4	8	Not Found	Not Found	High	High		100		200			200	200	0.068	0	4.63	1	100	1
FALSE	High	IsMasterProtein	Q8WU01	CSDE1 protein (Fragment) OS=Homo sapiens GN=CSDE1 PE=2 SV=1	0	107.937	21.6912	5	60	1	1	272	30.1	5.44	Peak Found	Peak Found	High	High		1.719	73.564	126.436	64.5	82.6	135.5	117.4	4.995	0	97.25	5	1510	5
FALSE	High	IsMasterProtein	ch20i_Q5U5J2	CSNK2A1 protein OS=Homo sapiens GN=CSNK2A1 PE=1 SV=1	0	199.961	45.3401	15	97	15	1	397	45.9	7.96	High	High	High	High		2.491	57.2858	142.714	57.1	57.5	142.9	142.5	17.738	0	137.99	15	2023	15
FALSE	High	IsMasterProtein	ch17i_Q2NKJ3	CST complex subunit CTC1 OS=Homo sapiens GN=CTC1 PE=1 SV=2	0	5.273	1.72555	1	4	1	1	1217	134.5	7.88	Not Found	Not Found	High	High		100		200			200	200	0.036	0	0	1	59	1
FALSE	High	IsMasterProtein	Q8IUB0	CTCL tumor antigen HD-CL-08 OS=Homo sapiens PE=2 SV=1	0	448.927	60.1108	14	382	1	1	361	38.6	8.85	Not Found	Not Found	Not Found	Not Found									1290.55	0	559.75	13	5657	14
FALSE	High	IsMasterProtein	A0A024R5Q8	CTD (Carboxy-terminal domain, RNA polymerase II, polypeptide A) small phosphatase like 2, isoform CRA_a OS=Homo sapiens GN=CTDSPL2 PE=4 SV=1	0	13.5	8.3691	3	8	3	1	466	53	6.4	Peak Found	Peak Found	High	High		5.818	29.3338	170.666	33.4	25.3	166.6	174.7	0.369	0	6.16	3	110	3
FALSE	High	IsMasterProtein	ch04i_Q13363	C-terminal-binding protein 1 OS=Homo sapiens GN=CTBP1 PE=1 SV=2	0	65.082	13.6364	4	36	4	1	440	47.5	6.77	High	High	High	High		1.348	85.1952	114.805	84.3	86.1	115.7	113.9	1.462	0	55.62	4	944	4
[truncated: 4,941 more rows]

## Sheet: A549_Hx_pSILAC
Checked	Protein FDR Confidence	Master	Accession	Description	Exp. q-value	Sum PEP Score	Coverage	# Peptides	# PSMs	# Unique Peptides	# Protein Groups	# AAs	MW [kDa]	calc. pI	Found in Sample: [S3] F3: Light, Control	Found in Sample: [S4] F4: Light, Control	Found in Sample: [S7] F3: Heavy, Sample	Found in Sample: [S8] F4: Heavy, Sample	Modifications	Abundance Ratio: (Heavy) / (Light)	Abundances (Grouped): Light	Abundances (Grouped): Heavy	Abundances (Scaled): F3: Light, Control	Abundances (Scaled): F4: Light, Control	Abundances (Scaled): F3: Heavy, Sample	Abundances (Scaled): F4: Heavy, Sample	emPAI	# Razor Peptides	Score Sequest HT	# Peptides Sequest HT	Score Mascot	# Peptides Mascot
[truncated: 6,331 more rows]
