# Supplementary material for: Microenvironmental Hypoxia Induces Dynamic Changes in Lung Cancer Synthesis and Secretion of Extracellular Vesicles
Source: Cancers (Basel). 2020 Oct 11;12(10):2917. doi: 10.3390/cancers12102917 (PMC7601203; doi:10.3390/cancers12102917)
Supplement: Supplementary file 1 [file cancers-12-02917-s001.zip › Supplementary_data_A549_EVs_pSILAC.xls]

## Sheet: A549_Nx_EVs_pSILAC
Checked	Protein FDR Confidence	Master	Accession	Description	Exp. q-value	Sum PEP Score	Coverage	# Peptides	# PSMs	# Unique Peptides	# Protein Groups	# AAs	MW [kDa]	calc. pI	Found in Sample: [S13] F7: Light, Control	Found in Sample: [S15] F9: Light, Control	Found in Sample: [S14] F8: Light, Control	Found in Sample: [S16] F7: Heavy, Sample	Found in Sample: [S18] F9: Heavy, Sample	Found in Sample: [S17] F8: Heavy, Sample	Modifications	Abundance Ratio: (F7, Heavy) / (F7, Light)	Abundance Ratio: (F9, Heavy) / (F9, Light)	Abundance Ratio: (F8, Heavy) / (F8, Light)	Abundances (Scaled): F7: Light, Control	Abundances (Scaled): F9: Light, Control	Abundances (Scaled): F8: Light, Control	Abundances (Scaled): F7: Heavy, Sample	Abundances (Scaled): F9: Heavy, Sample	Abundances (Scaled): F8: Heavy, Sample	emPAI	# Razor Peptides	Score Sequest HT	# Peptides Sequest HT	Score Mascot	# Peptides Mascot
FALSE	High	IsMasterProtein	ch20u_O15230	Laminin subunit alpha-5 OS=Homo sapiens GN=LAMA5 PE=1 SV=8	0	1234.59	32.1245	90	1434	89	1	3695	399.5	7.02	High	High	High	High	High	High		4.186	4.123	4.224	38.6	39	38.3	161.4	161	161.7	6.934	2	1982.28	90	24509	90
FALSE	High	IsMasterProtein	A0A024RAB6	Heparan sulfate proteoglycan 2 (Perlecan), isoform CRA_b OS=Homo sapiens GN=HSPG2 PE=4 SV=1	0	1080.51	32.2135	99	1031	95	1	4346	463.7	6.51	High	High	High	High	High	High		5.268	5.102	5.551	31.9	32.8	30.5	168.1	167.2	169.5	5.158	5	1426.52	98	16844	96
FALSE	High	IsMasterProtein	ch11i_P98088	Mucin-5AC OS=Homo sapiens GN=MUC5AC PE=1 SV=4	0	891.112	18.96	58	836	27	1	5654	585.2	7.02	High	High	High	High	High	High		4.364	4.581	4.42	37.3	35.8	36.9	162.7	164.2	163.1	3.241	43	1159.61	58	15143	57
FALSE	High	IsMasterProtein	O43707	Alpha-actinin-4 OS=Homo sapiens GN=ACTN4 PE=1 SV=2	0	820.179	66.191	58	1286	39	1	911	104.8	5.44	High	High	High	High	High	High		0.184	0.185	0.183	168.9	168.7	169	31.1	31.3	31	110.588	19	1754.19	57	19022	58
FALSE	High	IsMasterProtein	ch09u_P00352	Retinal dehydrogenase 1 OS=Homo sapiens GN=ALDH1A1 PE=1 SV=2	0	777.381	76.2475	35	1016	21	1	501	54.8	6.73	High	High	High	High	High	High	Acetyl [N-Term]	0.34	0.341	0.34	149.3	149.1	149.3	50.7	50.9	50.7	15316.4	21	1291.93	34	14190	35
FALSE	High	IsMasterProtein	A0A024R462	Fibronectin 1, isoform CRA_n OS=Homo sapiens GN=FN1 PE=4 SV=1	0	757.681	25.69	43	823	2	1	2355	259	5.73	Peak Found	Peak Found	Peak Found	High	High	High		7.448	7.751	7.982	23.7	22.9	22.3	176.3	177.1	177.7	6.779	65	1192.02	43	16601	43
FALSE	High	IsMasterProtein	ch07u_G3XAI2	Laminin subunit beta-1 OS=Homo sapiens GN=LAMB1 PE=1 SV=1	0	730.328	34.6409	50	773	20	1	1810	200.3	4.96	High	High	High	High	High	High		1.895	1.888	1.919	69.1	69.3	68.5	130.9	130.7	131.5	15.218	39	1006.72	50	10396	49
FALSE	High	IsMasterProtein	ch02u_P02751	Fibronectin OS=Homo sapiens GN=FN1 PE=1 SV=4	0	720.327	25.3562	42	797	1	1	2386	262.5	5.71	High	High	High	Not Found	Not Found	Not Found		0.01	0.01	0.01	200	200	200				6.028	0	1133.46	42	15750	42
FALSE	High	IsMasterProtein	O00468-6	Isoform 6 of Agrin OS=Homo sapiens GN=AGRN	0	660.767	36.9682	52	802	52	1	2045	214.7	6.4	High	High	High	High	High	High		4.49	4.37	4.295	36.4	37.2	37.8	163.6	162.8	162.2	8.575	0	1091.98	50	13881	52
FALSE	High	IsMasterProtein	ch01i_P11047	Laminin subunit gamma-1 OS=Homo sapiens GN=LAMC1 PE=1 SV=3	0	633.435	31.386	39	678	39	1	1609	177.5	5.12	High	High	High	High	High	High		2.539	2.568	2.553	56.5	56.1	56.3	143.5	143.9	143.7	15.284	0	891.97	38	12541	38
FALSE	High	IsMasterProtein	chXi_Q60FE5	Filamin A OS=Homo sapiens GN=FLNA PE=1 SV=1	0	583.302	31.0687	56	512	54	1	2620	278.1	6.06	High	High	High	High	High	High		0.219	0.225	0.213	164.1	163.3	164.9	35.9	36.7	35.1	3.571	0	709.49	55	7678	56
FALSE	High	IsMasterProtein	A0A0S2Z3Y1	Lectin galactoside-binding soluble 3 binding protein isoform 1 (Fragment) OS=Homo sapiens GN=LGALS3BP PE=2 SV=1	0	580.38	38.2906	21	884	21	1	585	65.3	5.27	High	High	High	High	High	High		6.35	6.356	6.268	27.2	27.2	27.5	172.8	172.8	172.5	173.753	0	1321.2	21	18837	21
FALSE	High	IsMasterProtein	ch19u_P01024	Complement C3 OS=Homo sapiens GN=C3 PE=1 SV=2	0	491.629	38.3043	56	805	56	1	1663	187	6.4	High	High	High	High	High	High		3.946	3.424	3.656	40.4	45.2	43	159.6	154.8	157	6.927	0	935.15	56	9766	53
FALSE	High	IsMasterProtein	O75369-8	Isoform 8 of Filamin-B OS=Homo sapiens GN=FLNB	0	483.354	33.308	65	394	63	1	2633	281.5	5.71	High	High	High	High	High	High		0.143	0.159	0.164	174.9	172.5	171.8	25.1	27.5	28.2	2.822	2	543.67	64	5128	65
FALSE	High	IsMasterProtein	ch09i_P55072	Transitional endoplasmic reticulum ATPase OS=Homo sapiens GN=VCP PE=1 SV=4	0	473.243	47.6427	33	484	33	1	806	89.3	5.26	High	High	High	High	High	High	Acetyl [N-Term]	0.203	0.197	0.197	166.2	167.1	167.1	33.8	32.9	32.9	27.73	0	668.95	32	8506	33
FALSE	High	IsMasterProtein	H6VRG1	Keratin 1 OS=Homo sapiens GN=KRT1 PE=3 SV=1	0	463.343	51.7829	33	864	30	1	645	66.1	8.12	High	High	High	Not Found	Peak Found	Not Found		0.01	0.01	0.01	200	199.9	200		0.1		34.697	3	1203.73	33	18372	32
FALSE	High	IsMasterProtein	Q8TAS6	LAMB1 protein (Fragment) OS=Homo sapiens GN=LAMB1 PE=2 SV=2	0	458.584	38.2271	31	401	1	1	1083	118.8	4.86	Not Found	Not Found	Not Found	Not Found	Not Found	Not Found											13.949	0	546.82	31	6170	30
FALSE	High	IsMasterProtein	P49327	Fatty acid synthase OS=Homo sapiens GN=FASN PE=1 SV=3	0	451.167	26.3242	48	377	48	1	2511	273.3	6.44	High	High	High	High	High	High		0.509	0.521	0.511	132.6	131.5	132.4	67.4	68.5	67.6	2.928	0	512.18	48	4865	48
FALSE	High	IsMasterProtein	Q4LE36	ACLY variant protein (Fragment) OS=Homo sapiens GN=ACLY variant protein PE=2 SV=1	0	449.738	34.2128	36	695	36	1	1137	124.5	8.03	High	High	High	High	High	High		0.361	0.328	0.342	146.9	150.6	149	53.1	49.4	51	13.758	0	840.45	36	8034	36
FALSE	High	IsMasterProtein	P63261	Actin, cytoplasmic 2 OS=Homo sapiens GN=ACTG1 PE=1 SV=1	0	367.789	62.1333	19	548	1	1	375	41.8	5.48	High	High	High	Peak Found	Peak Found	Peak Found	Acetyl [N-Term]	0.198	0.181	0.178	166.9	169.4	169.8	33.1	30.6	30.2	405.159	0	630.48	18	7068	19
FALSE	High	IsMasterProtein	ch12u_B4DPQ0	Complement C1r subcomponent OS=Homo sapiens GN=C1R PE=1 SV=1	0	359.542	50.3477	26	396	1	1	719	81.8	6.37	Not Found	Not Found	Not Found	High	High	High		19.043	19.586	20.504	10	9.7	9.3	190	190.3	190.7	13.678	29	553.15	26	5644	26
FALSE	High	IsMasterProtein	T1R7N3	MUC5AC (Fragment) OS=Homo sapiens GN=MUC5AC PE=4 SV=1	0	359.255	18.544	24	306	6	1	4066	413.6	8.09	High	High	High	High	High	High		4.613	4.039	4.35	35.6	39.7	37.4	164.4	160.3	162.6	1.382	0	446.48	23	4933	23
FALSE	High	IsMasterProtein	Q53HT9	Complement component 1, r subcomponent variant (Fragment) OS=Homo sapiens PE=2 SV=1	0	350.686	52.766	26	397	1	1	705	80.2	6.44	Not Found	Not Found	Not Found	Not Found	Not Found	Not Found											13.678	0	540.56	26	5605	26
FALSE	High	IsMasterProtein	ch07u_P60709	Actin, cytoplasmic 1 OS=Homo sapiens GN=ACTB PE=1 SV=1	0	347.751	62.1333	19	540	1	1	375	41.7	5.48	High	High	High	Peak Found	Peak Found	Peak Found	Acetyl [N-Term]	0.219	0.222	0.223	164.1	163.6	163.5	35.9	36.4	36.5	271.134	20	630.48	18	6655	19
FALSE	High	IsMasterProtein	ch03u_Q02388	Collagen alpha-1(VII) chain OS=Homo sapiens GN=COL7A1 PE=1 SV=2	0	347.271	18.1046	38	330	38	1	2944	295	6.27	High	High	High	High	High	High		3.037	3.021	3.008	49.5	49.7	49.9	150.5	150.3	150.1	1.192	0	420.21	38	4952	38
FALSE	High	IsMasterProtein	ch16u_P04075	Fructose-bisphosphate aldolase A OS=Homo sapiens GN=ALDOA PE=1 SV=2	0	343.787	54.6703	16	307	15	1	364	39.4	8.09	High	High	High	High	High	High		0.272	0.267	0.267	157.3	157.8	157.9	42.7	42.2	42.1	80.855	2	423.16	14	6568	16
FALSE	High	IsMasterProtein	ch09u_Q5SYQ7	Retinal dehydrogenase 1 (Fragment) OS=Homo sapiens GN=ALDH1A1 PE=1 SV=1	0	342.528	76.3547	14	482	1	1	203	22.6	6.04	High	High	High	Peak Found	Not Found	Not Found	Acetyl [N-Term]	0.276	0.01	0.01	156.8	200	200	43.2			8253.04	0	573.66	13	7602	14
FALSE	High	IsMasterProtein	P12814-3	Isoform 3 of Alpha-actinin-1 OS=Homo sapiens GN=ACTN1	0	336.415	39.6061	34	632	16	1	914	105.5	5.41	High	High	High	High	High	High		0.164	0.24	0.37	171.8	161.3	145.9	28.2	38.7	54.1	8.641	0	742.69	33	7932	33
FALSE	High	IsMasterProtein	A8K2H4	cDNA FLJ78235 OS=Homo sapiens PE=2 SV=1	0	326.812	48.6726	19	449	19	1	339	37.8	6.3	High	High	High	High	High	High		12.792	13.023	12.434	14.5	14.3	14.9	185.5	185.7	185.1	463.159	0	614.44	19	6884	19
FALSE	High	IsMasterProtein	A7Y9J9	Mucin 5AC, oligomeric mucus/gel-forming OS=Homo sapiens GN=MUC5AC PE=4 SV=1	0	318.498	7.62043	30	275	17	1	6207	648.4	6.76	High	High	High	High	High	High		5.589	6.221	6.55	30.4	27.7	26.5	169.6	172.3	173.5	0.623	0	354.79	30	4551	29
FALSE	High	IsMasterProtein	ch15i_P07355	Annexin A2 OS=Homo sapiens GN=ANXA2 PE=1 SV=2	0	311.555	56.9322	22	362	22	1	339	38.6	7.75	High	High	High	High	High	High	Acetyl [N-Term]	0.147	0.153	0.147	174.3	173.5	174.4	25.7	26.5	25.6	120.153	0	470.21	21	5408	22
FALSE	High	IsMasterProtein	ch02u_P35052	Glypican-1 OS=Homo sapiens GN=GPC1 PE=1 SV=2	0	311.289	36.3799	17	335	17	1	558	61.6	7.3	High	High	High	High	High	High		0.912	0.927	0.926	104.6	103.8	103.8	95.4	96.2	96.2	28.552	0	524.18	16	4971	17
FALSE	High	IsMasterProtein	ch09u_Q13219	Pappalysin-1 OS=Homo sapiens GN=PAPPA PE=1 SV=3	0	307.364	22.1881	32	275	32	1	1627	180.9	6.18	High	High	High	High	High	High		5.105	5.081	5.127	32.8	32.9	32.6	167.2	167.1	167.4	3.097	0	348.2	32	3961	32
FALSE	High	IsMasterProtein	ch15u_P07996	Thrombospondin-1 OS=Homo sapiens GN=THBS1 PE=1 SV=2	0	300.15	22.3077	23	404	23	1	1170	129.3	4.94	High	High	High	High	High	High		3.294	3.407	3.247	46.6	45.4	47.1	153.4	154.6	152.9	4.623	0	500.46	23	5466	23
FALSE	High	IsMasterProtein	V9HWI3	Cathepsin D (Lysosomal aspartyl peptidase), isoform CRA_a OS=Homo sapiens GN=HEL-S-130P PE=2 SV=1	0	291.442	51.9417	20	475	13	1	412	44.5	6.54	High	High	High	High	High	High		11.4	10.74	11.015	16.1	17	16.6	183.9	183	183.4	366.466	16	508.62	20	4754	20
FALSE	High	IsMasterProtein	ch07i_Q92823-5	Isoform 5 of Neuronal cell adhesion molecule OS=Homo sapiens GN=NRCAM	0	268.45	19.8777	17	241	17	1	1308	144.3	5.67	High	High	High	High	High	High		1.978	1.995	1.94	67.2	66.8	68	132.8	133.2	132	2.799	0	320.3	17	4310	17
FALSE	High	IsMasterProtein	P06733	Alpha-enolase OS=Homo sapiens GN=ENO1 PE=1 SV=2	0	267.642	43.5484	16	212	15	1	434	47.1	7.39	High	High	High	High	High	High		0.23	0.238	0.236	162.6	161.5	161.8	37.4	38.5	38.2	19.434	1	281.73	16	3499	15
FALSE	High	IsMasterProtein	ch05u_Q15582	Transforming growth factor-beta-induced protein ig-h3 OS=Homo sapiens GN=TGFBI PE=1 SV=1	0	262.868	45.388	22	269	22	1	683	74.6	7.71	High	High	High	High	High	High		8.001	7.831	7.734	22.2	22.6	22.9	177.8	177.4	177.1	7.962	0	351.38	22	3343	22
FALSE	High	IsMasterProtein	Q59EN5	Prosaposin variant (Fragment) OS=Homo sapiens PE=2 SV=1	0	253.164	40.7547	21	426	21	1	530	58.7	5.1	High	High	High	High	High	High		15.667	14.962	16.798	12	12.5	11.2	188	187.5	188.8	17.395	0	474.16	20	4944	21
FALSE	High	IsMasterProtein	P00338	L-lactate dehydrogenase A chain OS=Homo sapiens GN=LDHA PE=1 SV=2	0	251.572	49.3976	18	413	16	1	332	36.7	8.27	High	High	High	High	High	High	Acetyl [N-Term]	0.164	0.168	0.177	171.8	171.3	170	28.2	28.7	30	38.811	3	406.65	16	5078	18
FALSE	High	IsMasterProtein	ch17u_A0A087WVQ6	Clathrin heavy chain OS=Homo sapiens GN=CLTC PE=1 SV=1	0	248.415	22.8708	30	215	30	1	1679	191.9	5.69	High	High	High	High	High	High	Acetyl [N-Term]	0.486	0.708	0.128	134.6	117.1	177.2	65.4	82.9	22.8	1.976	0	293.75	29	3054	30
FALSE	High	IsMasterProtein	ch17u_P35527	Keratin, type I cytoskeletal 9 OS=Homo sapiens GN=KRT9 PE=1 SV=3	0	231.017	51.3644	21	370	21	1	623	62	5.24	High	High	High	Peak Found	Peak Found	Not Found		0.01	0.01	0.01	200	199.2	200	0	0.8		6.627	0	498.23	21	7826	21
FALSE	High	IsMasterProtein	ch15i_Q08431	Lactadherin OS=Homo sapiens GN=MFGE8 PE=1 SV=2	0	221.482	51.938	16	207	2	1	387	43.1	8.15	Peak Found	Peak Found	Peak Found	High	High	High		11.491	12.744	12.336	16	14.6	15	184	185.4	185	16.378	17	290.95	16	3424	16
FALSE	High	IsMasterProtein	O00560	Syntenin-1 OS=Homo sapiens GN=SDCBP PE=1 SV=1	0	221.428	38.5906	11	261	11	1	298	32.4	7.53	High	High	High	High	High	High	Acetyl [N-Term]	2.409	2.351	2.38	58.7	59.7	59.2	141.3	140.3	140.8	128.155	0	264.58	9	3241	10
FALSE	High	IsMasterProtein	Q6YHK3	CD109 antigen OS=Homo sapiens GN=CD109 PE=1 SV=2	0	218.185	14.2561	14	216	14	1	1445	161.6	5.85	High	High	High	High	High	High		0.82	0.843	0.833	109.9	108.5	109.1	90.1	91.5	90.9	1.649	0	281.54	14	3749	14
FALSE	High	IsMasterProtein	P07900-2	Isoform 2 of Heat shock protein HSP 90-alpha OS=Homo sapiens GN=HSP90AA1	0	216.077	25.2927	23	224	13	1	854	98.1	5.16	High	High	High	High	High	High		0.17	0.152	0.156	170.9	173.7	173	29.1	26.3	27	4.179	9	289.28	23	3423	23
FALSE	High	IsMasterProtein	ch12i_P07195	L-lactate dehydrogenase B chain OS=Homo sapiens GN=LDHB PE=1 SV=2	0	207.289	39.521	16	513	14	1	334	36.6	6.05	High	High	High	High	High	High		0.167	0.165	0.171	171.4	171.7	170.9	28.6	28.3	29.1	110.588	0	537.08	16	6683	16
FALSE	High	IsMasterProtein	P02774-3	Isoform 3 of Vitamin D-binding protein OS=Homo sapiens GN=GC	0	206.369	9.12779	6	159	6	1	493	55.1	5.74	High	High	High	Peak Found	Peak Found	Peak Found		0.01	0.01	0.01	198.3	199.4	198.1	1.7	0.6	1.9	3.299	0	279.05	6	4353	6
FALSE	High	IsMasterProtein	ch12i_P35908	Keratin, type II cytoskeletal 2 epidermal OS=Homo sapiens GN=KRT2 PE=1 SV=2	0	200.07	55.8685	29	504	20	1	639	65.4	8	High	High	High	Not Found	Not Found	Not Found		0.01	0.01	0.01	200	200	200		0		6.252	7	497.46	29	5666	29
FALSE	High	IsMasterProtein	ch17u_P13645	Keratin, type I cytoskeletal 10 OS=Homo sapiens GN=KRT10 PE=1 SV=6	0	197.457	42.1233	25	522	23	1	584	58.8	5.21	High	High	High	Peak Found	Peak Found	Peak Found		0.01	0.01	0.01	199.5	199.3	199.2	0.5	0.7	0.8	19.962	2	539.82	25	5938	24
FALSE	High	IsMasterProtein	Q08431-2	Isoform 2 of Lactadherin OS=Homo sapiens GN=MFGE8	0	195.683	59.9359	15	181	1	1	312	35.2	8.85	Not Found	Not Found	Not Found	Not Found	Not Found	Not Found											20.544	0	257.24	14	2995	15
FALSE	High	IsMasterProtein	A0A024RAL1	Chondroitin sulfate proteoglycan 2 (Versican), isoform CRA_c OS=Homo sapiens GN=CSPG2 PE=4 SV=1	0	191.176	7.01536	15	366	15	1	2409	264.9	4.54	High	High	High	High	High	High		1.629	1.655	1.655	76.1	75.3	75.3	123.9	124.7	124.7	1.26	0	423.48	15	4511	14
FALSE	High	IsMasterProtein	ch08i_P10909-2	Isoform 2 of Clusterin OS=Homo sapiens GN=CLU	0	183.73	27.1457	15	240	15	1	501	57.8	6.68	High	High	High	High	High	High		13.507	13.2	11.276	13.8	14.1	16.3	186.2	185.9	183.7	10.86	0	329.05	15	4103	15
FALSE	High	IsMasterProtein	ch17i_P07237	Protein disulfide-isomerase OS=Homo sapiens GN=P4HB PE=1 SV=3	0	182.377	39.7638	20	195	20	1	508	57.1	4.87	High	High	High	High	High	High		0.163	0.162	0.178	172	172.1	169.8	28	27.9	30.2	7.414	0	208.51	20	2404	20
FALSE	High	IsMasterProtein	ch09u_P04083	Annexin A1 OS=Homo sapiens GN=ANXA1 PE=1 SV=2	0	181.156	47.3988	17	190	17	1	346	38.7	7.02	High	High	High	High	High	High		0.226	0.17	0.205	163.1	170.9	166	36.9	29.1	34	25.827	0	243.18	17	3244	17
FALSE	High	IsMasterProtein	ch11i_P08195-4	Isoform 4 of 4F2 cell-surface antigen heavy chain OS=Homo sapiens GN=SLC3A2	0	170.883	31.9213	16	223	16	1	661	71.1	4.97	High	High	High	High	High	High		0.633	0.597	0.713	122.5	125.2	116.8	77.5	74.8	83.2	7.111	0	287.5	16	2811	16
FALSE	High	IsMasterProtein	ch15i_Q92859	Neogenin OS=Homo sapiens GN=NEO1 PE=1 SV=2	0	168.158	17.8645	18	115	18	1	1461	159.9	6.54	High	High	High	High	High	High		2.85	2.914	2.7	51.9	51.1	54.1	148.1	148.9	145.9	1.546	0	165.02	18	1637	18
FALSE	High	IsMasterProtein	A8K2N0	cDNA FLJ77835, highly similar to Homo sapiens complement component 1, s subcomponent (C1S), transcript variant 2, mRNA OS=Homo sapiens PE=2 SV=1	0	160.672	28.7791	17	239	17	1	688	76.6	4.98	Peak Found	Peak Found	High	High	High	High		65.591	36.695	40.618	3	5.3	4.8	197	194.7	195.2	4.436	0	347.62	17	4248	17
FALSE	High	IsMasterProtein	ch11i_F8W787	Cathepsin D (Fragment) OS=Homo sapiens GN=CTSD PE=1 SV=1	0	160.416	49.2462	8	202	1	1	199	21.5	5.8	Not Found	Not Found	Not Found	Not Found	Not Found	Not Found											431.876	0	241.13	7	2476	8
FALSE	High	IsMasterProtein	P62258	14-3-3 protein epsilon OS=Homo sapiens GN=YWHAE PE=1 SV=1	0	160.171	50.5882	14	334	12	1	255	29.2	4.74	High	High	High	High	High	High	Acetyl [N-Term]	0.205	0.207	0.199	166	165.7	166.8	34	34.3	33.2	76.426	3	321.16	12	4444	14
FALSE	High	IsMasterProtein	ch09u_P01031	Complement C5 OS=Homo sapiens GN=C5 PE=1 SV=4	0	156.853	20.6444	28	199	28	1	1676	188.2	6.52	High	High	High	High	High	High		4.845	7.211	5.519	34.2	24.4	30.7	165.8	175.6	169.3	1.188	0	221.96	28	2344	27
FALSE	High	IsMasterProtein	P68032	Actin, alpha cardiac muscle 1 OS=Homo sapiens GN=ACTC1 PE=1 SV=1	0	155.525	33.1565	12	316	1	1	377	42	5.39	Not Found	Not Found	Not Found	Not Found	Not Found	Not Found		0.01	0.01	0.01	200	200	200				23.621	1	315.07	12	3636	12
FALSE	High	IsMasterProtein	ch08u_P63104	14-3-3 protein zeta/delta OS=Homo sapiens GN=YWHAZ PE=1 SV=1	0	154.466	39.5918	11	278	8	1	245	27.7	4.79	High	High	High	High	High	High		0.229	0.225	0.224	162.8	163.3	163.5	37.2	36.7	36.5	25.367	1	247.18	11	3930	11
FALSE	High	IsMasterProtein	ch20u_O14818	Proteasome subunit alpha type-7 OS=Homo sapiens GN=PSMA7 PE=1 SV=1	0	154.214	44.7581	13	219	6	1	248	27.9	8.46	High	High	High	High	Peak Found	High		0.129	0.13	0.128	177.1	177	177.3	22.9	23	22.7	99	9	222.41	13	2668	13
FALSE	High	IsMasterProtein	ch12i_P04406	Glyceraldehyde-3-phosphate dehydrogenase OS=Homo sapiens GN=GAPDH PE=1 SV=3	0	149.46	38.5075	11	199	11	1	335	36	8.46	High	High	High	High	High	High		0.267	0.259	0.264	157.8	158.9	158.3	42.2	41.1	41.7	12.895	0	237.36	11	2950	11
FALSE	High	IsMasterProtein	ch12i_P60174	Triosephosphate isomerase OS=Homo sapiens GN=TPI1 PE=1 SV=3	0	145.971	52.7972	14	166	14	1	286	30.8	5.92	High	High	High	High	High	High		0.189	0.183	0.181	168.3	169	169.4	31.7	31	30.6	28.764	0	183.79	14	2274	14
FALSE	High	IsMasterProtein	ch01u_P10586	Receptor-type tyrosine-protein phosphatase F OS=Homo sapiens GN=PTPRF PE=1 SV=2	0	142.677	12.8998	15	96	14	1	1907	212.7	6.3	High	High	High	High	High	High		1.546	1.635	1.455	78.6	75.9	81.5	121.4	124.1	118.5	0.645	1	142.32	15	1482	15
FALSE	High	IsMasterProtein	O94985	Calsyntenin-1 OS=Homo sapiens GN=CLSTN1 PE=1 SV=1	0	141.643	19.1641	18	166	18	1	981	109.7	4.91	High	High	High	High	High	High		16.801	14.886	14.9	11.2	12.6	12.6	188.8	187.4	187.4	2.754	0	214.94	18	2435	18
FALSE	High	IsMasterProtein	ch11i_P25786-2	Isoform Long of Proteasome subunit alpha type-1 OS=Homo sapiens GN=PSMA1	0	139.008	33.829	9	288	9	1	269	30.2	6.99	High	High	High	High	High	High		0.14	0.141	0.14	175.4	175.3	175.4	24.6	24.7	24.6	32.598	0	236.6	9	2951	9
FALSE	High	IsMasterProtein	A8K6A7	Alpha-mannosidase OS=Homo sapiens PE=2 SV=1	0	138.366	23.64	17	123	17	1	1011	113.7	7.28	High	High	High	High	High	High		9.625	12.432	10.583	18.8	14.9	17.3	181.2	185.1	182.7	1.921	0	141.8	17	1435	16
FALSE	High	IsMasterProtein	ch14u_P25788	Proteasome subunit alpha type-3 OS=Homo sapiens GN=PSMA3 PE=1 SV=2	0	135.618	45.8824	12	212	11	1	255	28.4	5.33	High	High	High	High	High	High	Acetyl [N-Term]	0.124	0.123	0.119	178	178.1	178.7	22	21.9	21.3	162.789	1	219.8	11	2822	12
FALSE	High	IsMasterProtein	A8K335	cDNA FLJ76254, highly similar to Homo sapiens gamma-glutamyl hydrolase (GGH), mRNA OS=Homo sapiens PE=2 SV=1	0	132.584	33.0189	11	173	11	1	318	36	7.42	High	High	High	High	High	High		7.132	7.222	7.326	24.6	24.3	24	175.4	175.7	176	24.119	0	195.56	11	1597	11
FALSE	High	IsMasterProtein	B7Z3K9	Fructose-bisphosphate aldolase OS=Homo sapiens PE=2 SV=1	0	132.2	15.5211	4	92	3	1	451	48.4	8.07	High	High	High	High	High	High		0.536		0.547	130.2		129.3	69.8		70.7	1.593	0	143.82	4	2553	4
FALSE	High	IsMasterProtein	ch14i_G3V5Z7	Proteasome subunit alpha type OS=Homo sapiens GN=PSMA6 PE=1 SV=1	0	132.011	45.6349	12	197	12	1	252	28.1	6.76	High	High	High	High	High	High		0.15	0.149	0.148	173.9	174	174.2	26.1	26	25.8	62.096	0	226.71	12	2684	12
FALSE	High	IsMasterProtein	P08238	Heat shock protein HSP 90-beta OS=Homo sapiens GN=HSP90AB1 PE=1 SV=4	0	129.86	24.3094	17	143	6	1	724	83.2	5.03	High	High	High	Peak Found	Peak Found	Peak Found		0.14	0.124	0.132	175.4	177.9	176.7	24.6	22.1	23.3	2.615	1	164.89	17	1786	17
FALSE	High	IsMasterProtein	A8K7T0	Kynureninase OS=Homo sapiens GN=KYNU PE=2 SV=1	0	129.743	28.3871	11	109	11	1	465	52.3	6.83	High	High	High	High	High	High		0.21	0.224	0.21	165.3	163.4	165.3	34.7	36.6	34.7	4.736	0	147.51	11	1481	10
FALSE	High	IsMasterProtein	ch17i_Q15818	Neuronal pentraxin-1 OS=Homo sapiens GN=NPTX1 PE=2 SV=2	0	126.36	24.3056	10	110	10	1	432	47.1	6.55	High	High	High	High	High	High		4.672	5.991	6.548	35.3	28.6	26.5	164.7	171.4	173.5	4.995	0	160.64	10	1717	10
FALSE	High	IsMasterProtein	ch05u_P07686	Beta-hexosaminidase subunit beta OS=Homo sapiens GN=HEXB PE=1 SV=3	0	125.623	29.8561	16	120	15	1	556	63.1	6.76	High	High	High	High	High	High		6.143	4.342	5.858	28	37.4	29.2	172	162.6	170.8	4.722	1	151.21	16	1400	16
FALSE	High	IsMasterProtein	ch12u_Q07954	Prolow-density lipoprotein receptor-related protein 1 OS=Homo sapiens GN=LRP1 PE=1 SV=2	0	122.701	4.64349	17	91	17	1	4544	504.3	5.39	High	High	High	High	High	High		0.483	0.502	0.492	134.9	133.1	134.1	65.1	66.9	65.9	0.239	0	107.38	17	1311	17
FALSE	High	IsMasterProtein	Q68DN3	Neuropilin OS=Homo sapiens GN=DKFZp781F1414 PE=2 SV=1	0	121.867	18.8516	10	119	10	1	923	103	5.95	High	High	High	High	High	High		3.932	4.975	3.815	40.5	33.5	41.5	159.5	166.5	158.5	1.387	0	159.83	10	1911	10
FALSE	High	IsMasterProtein	ch02u_P27708	CAD protein OS=Homo sapiens GN=CAD PE=1 SV=3	0	121.521	13.1236	23	117	23	1	2225	242.8	6.46	High	High	High	High	Peak Found	High	Acetyl [N-Term]	0.113	0.133	0.124	179.7	176.5	177.9	20.3	23.5	22.1	0.727	0	129.69	22	1304	23
FALSE	High	IsMasterProtein	O60218	Aldo-keto reductase family 1 member B10 OS=Homo sapiens GN=AKR1B10 PE=1 SV=2	0	120.584	42.4051	11	97	11	1	316	36	7.84	High	High	High	High	High	High	Acetyl [N-Term]	0.169	0.157	0.174	171	172.8	170.4	29	27.2	29.6	11.452	0	104.97	9	1130	11
FALSE	High	IsMasterProtein	ch14u_P28074	Proteasome subunit beta type-5 OS=Homo sapiens GN=PSMB5 PE=1 SV=3	0	119.67	26.616	7	250	7	1	263	28.5	6.92	High	High	High	High	High	High		0.152	0.151	0.148	173.6	173.7	174.2	26.4	26.3	25.8	16.191	0	310.28	7	3947	7
FALSE	High	IsMasterProtein	chXi_P11413-2	Isoform Long of Glucose-6-phosphate 1-dehydrogenase OS=Homo sapiens GN=G6PD	0	118.597	34.0463	16	140	16	1	561	63.8	6.89	High	High	High	High	High	High	Acetyl [N-Term]	0.291	0.349	0.273	154.9	148.3	157.1	45.1	51.7	42.9	4.012	0	126.22	15	1444	16
FALSE	High	IsMasterProtein	ch15u_P14618	Pyruvate kinase PKM OS=Homo sapiens GN=PKM PE=1 SV=4	0	118.018	34.4633	15	109	15	1	531	57.9	7.84	High	High	High	High	High	High		0.199	0.19	0.179	166.7	168	169.6	33.3	32	30.4	2.932	0	133	15	1334	15
FALSE	High	IsMasterProtein	ch04i_A0A087WVP1	Protocadherin Fat 1 OS=Homo sapiens GN=FAT1 PE=1 SV=1	0	117.3	7.23312	23	112	23	1	4590	506.1	5	High	High	High	High	High	High		2.847	3.69	2.677	52	42.6	54.4	148	157.4	145.6	0.35	0	124.95	23	876	22
FALSE	High	IsMasterProtein	ch02i_Q15631	Translin OS=Homo sapiens GN=TSN PE=1 SV=1	0	116.431	39.9123	11	140	11	1	228	26.2	6.44	High	High	High	High	High	High		0.177	0.179	0.181	169.9	169.6	169.3	30.1	30.4	30.7	82.768	0	162.21	11	1349	11
FALSE	High	IsMasterProtein	ch02i_Q6S8J3	POTE ankyrin domain family member E OS=Homo sapiens GN=POTEE PE=1 SV=3	0	115.244	9.76744	7	228	1	1	1075	121.3	6.2	High	High	High	Not Found	Peak Found	Not Found		0.01		0.01	200		200				0.988	0	246.24	7	3176	7
FALSE	High	IsMasterProtein	ch21i_P12109	Collagen alpha-1(VI) chain OS=Homo sapiens GN=COL6A1 PE=1 SV=3	0	115.115	17.3152	15	131	15	1	1028	108.5	5.43	High	High	High	High	High	High		6.087	5.819	6.034	28.2	29.3	28.4	171.8	170.7	171.6	1.127	0	166.85	15	1703	15
FALSE	High	IsMasterProtein	V9HW22	Epididymis luminal protein 33 OS=Homo sapiens GN=HEL-S-72p PE=2 SV=1	0	114.949	26.161	13	135	12	1	646	70.9	5.52	High	High	High	Peak Found	Peak Found	High		0.149	0.167	0.16	174.1	171.4	172.5	25.9	28.6	27.5	2.07	2	173.38	13	2007	13
FALSE	High	IsMasterProtein	ch01i_P49721	Proteasome subunit beta type-2 OS=Homo sapiens GN=PSMB2 PE=1 SV=1	0	110.192	36.3184	9	182	9	1	201	22.8	7.02	High	High	High	High	High	High		0.137	0.148	0.146	175.9	174.3	174.5	24.1	25.7	25.5	57.78	0	184.83	9	1881	9
FALSE	High	IsMasterProtein	ch17i_P28799	Granulins OS=Homo sapiens GN=GRN PE=1 SV=2	0	110.15	23.1029	11	163	11	1	593	63.5	6.83	Peak Found	High	Peak Found	High	High	High		36.804	36.489	43.604	5.3	5.3	4.5	194.7	194.7	195.5	3.771	0	205.38	11	2185	11
FALSE	High	IsMasterProtein	ch17i_P54802	Alpha-N-acetylglucosaminidase OS=Homo sapiens GN=NAGLU PE=1 SV=2	0	108.126	22.0727	12	77	12	1	743	82.2	6.65	High	High	Peak Found	High	High	High		7.072	9.236	6.19	24.8	19.5	27.8	175.2	180.5	172.2	1.512	0	109.9	12	1585	12
FALSE	High	IsMasterProtein	B4DH02	cDNA FLJ50510, highly similar to Heat shock 70 kDa protein 4 OS=Homo sapiens PE=2 SV=1	0	107.394	24.5238	14	152	13	1	840	94.3	5.19	High	High	High	High	High	High		0.398	0.507	0.199	143	132.7	166.8	57	67.3	33.2	1.395	1	192.1	14	2057	14
FALSE	High	IsMasterProtein	ch08i_Q15149	Plectin OS=Homo sapiens GN=PLEC PE=1 SV=3	0	105.455	6.98121	26	107	26	1	4684	531.5	5.96	High	High	High	Peak Found	High	Peak Found		7.45	0.126	0.09	23.7	177.6	183.5	176.3	22.4	16.5	0.197	0	117.19	25	1065	26
FALSE	High	IsMasterProtein	P29401-2	Isoform 2 of Transketolase OS=Homo sapiens GN=TKT	0	104.484	24.8811	11	116	11	1	631	68.8	7.52	High	High	High	Peak Found	Peak Found	Peak Found		0.044	0.07	0.152	191.5	187	173.6	8.5	13	26.4	1.707	0	150.82	11	1885	11
FALSE	High	IsMasterProtein	Q86XX4-2	Isoform 2 of Extracellular matrix protein FRAS1 OS=Homo sapiens GN=FRAS1	0	103.493	7.57727	19	88	19	1	4012	443.4	5.59	Peak Found	High	Peak Found	High	High	High		7.453	6.701	6.162	23.7	26	27.9	176.3	174	172.1	0.286	0	96.12	19	831	19
FALSE	High	IsMasterProtein	B4DVA7	Beta-hexosaminidase OS=Homo sapiens PE=2 SV=1	0	103.239	26.8519	12	90	2	1	540	62	5.26	Peak Found	Peak Found	Not Found	High	High	High		8.925	8.027	6.255	20.2	22.2	27.6	179.8	177.8	172.4	3.047	9	105.7	12	1336	12
FALSE	High	IsMasterProtein	ch12i_F5H5D3	Tubulin alpha-1C chain OS=Homo sapiens GN=TUBA1C PE=1 SV=1	0	102.414	31.5992	12	118	5	1	519	57.7	5.07	High	High	High	High	High	Peak Found		0.094	0.114	0.082	182.9	179.6	184.8	17.1	20.4	15.2	3.894	8	133.73	11	1674	12
FALSE	High	IsMasterProtein	P04259	Keratin, type II cytoskeletal 6B OS=Homo sapiens GN=KRT6B PE=1 SV=5	0	100.617	31.5603	18	323	0	1	564	60	8	Not Found	Not Found	Not Found	Not Found	Not Found	Not Found		0.01	0.01	0.012	200	198.4	197.5		1.6	2.5	2.831	11	324.86	18	3688	18
FALSE	High	IsMasterProtein	P48668	Keratin, type II cytoskeletal 6C OS=Homo sapiens GN=KRT6C PE=1 SV=3	0	100.259	31.5603	18	287	1	1	564	60	8	High	High	High	Not Found	Not Found	Not Found		0.01	0.01	0.01	200	200	200				2.594	1	288.01	18	3342	18
FALSE	High	IsMasterProtein	A0A024RAI1	ARP3 actin-related protein 3 homolog (Yeast), isoform CRA_a OS=Homo sapiens GN=ACTR3 PE=3 SV=1	0	99.808	36.6029	11	71	11	1	418	47.3	5.88	High	High	High	Peak Found	High	Peak Found	Acetyl [N-Term]	0.138	0.163	0.147	175.8	172	174.3	24.2	28	25.7	4.484	0	95.53	10	988	11
FALSE	High	IsMasterProtein	Q562M3	Actin-like protein (Fragment) OS=Homo sapiens GN=ACT PE=4 SV=1	0	97.301	57.2816	3	129	1	1	103	11.5	6.68	High	High	High	High	High	High		0.17	0.184	0.174	170.9	168.9	170.3	29.1	31.1	29.7	250.189	0	186.74	3	804	3
FALSE	High	IsMasterProtein	P08779	Keratin, type I cytoskeletal 16 OS=Homo sapiens GN=KRT16 PE=1 SV=4	0	96.835	33.4038	17	214	7	1	473	51.2	5.05	High	High	High	Not Found	Not Found	Not Found		0.01	0.01	0.01	200	200	200				2.49	0	223.98	17	2156	17
FALSE	High	IsMasterProtein	ch20i_O14818-2	Isoform 2 of Proteasome subunit alpha type-7 OS=Homo sapiens GN=PSMA7	0	96.049	48.3146	8	138	1	1	178	20.2	8.51	Not Found	High	Not Found	Not Found	Peak Found	Not Found			0.062			188.3			11.7		23.245	0	135.76	7	1989	8
FALSE	High	IsMasterProtein	A0A0A0MTS2	Glucose-6-phosphate isomerase (Fragment) OS=Homo sapiens GN=GPI PE=1 SV=1	0	95.863	25.3054	8	86	8	1	573	64.8	9.04	High	High	High	High	High	High		0.154	0.165	0.158	173.4	171.6	172.6	26.6	28.4	27.4	2.262	0	107.22	8	1035	8
FALSE	High	IsMasterProtein	ch02u_P27348	14-3-3 protein theta OS=Homo sapiens GN=YWHAQ PE=1 SV=1	0	94.447	34.2857	11	143	9	1	245	27.7	4.78	High	High	High	High	High	High		0.384	0.37	0.37	144.5	145.9	146	55.5	54.1	54	10.365	0	144.04	11	1877	11
FALSE	High	IsMasterProtein	P11717	Cation-independent mannose-6-phosphate receptor OS=Homo sapiens GN=IGF2R PE=1 SV=3	0	94.139	9.31353	18	87	18	1	2491	274.2	5.94	High	High	High	High	High	High		0.498	0.38	0.454	133.5	144.9	137.6	66.5	55.1	62.4	0.418	0	98.32	18	703	18
FALSE	High	IsMasterProtein	ch06i_P20618	Proteasome subunit beta type-1 OS=Homo sapiens GN=PSMB1 PE=1 SV=2	0	93.618	40.6639	10	140	10	1	241	26.5	8.13	High	High	High	High	High	High		0.137	0.132	0.132	175.9	176.6	176.8	24.1	23.4	23.2	14.849	0	150.57	10	1462	10
FALSE	High	IsMasterProtein	F6KPG5	Albumin (Fragment) OS=Homo sapiens PE=2 SV=1	0	92.473	20.6838	11	978	2	1	585	66.5	6.04	High	High	High	Not Found	Not Found	Not Found		0.01	0.01	0.01	200	200	200				2.938	0	603.72	11	10022	9
FALSE	High	IsMasterProtein	P68366	Tubulin alpha-4A chain OS=Homo sapiens GN=TUBA4A PE=1 SV=1	0	91.465	34.1518	11	90	4	1	448	49.9	5.06	High	High	High	Peak Found	Peak Found	High		0.08	0.052	0.083	185.1	190	184.7	14.9	10	15.3	4.623	0	101.07	10	1103	11
FALSE	High	IsMasterProtein	ch08u_Q9Y4K0	Lysyl oxidase homolog 2 OS=Homo sapiens GN=LOXL2 PE=1 SV=1	0	90.761	11.2403	5	84	5	1	774	86.7	6.38	High	High	High	High	High	High		10.115	10.344	9.295	18	17.6	19.4	182	182.4	180.6	1.11	0	119.63	5	1433	5
FALSE	High	IsMasterProtein	ch17i_P02533	Keratin, type I cytoskeletal 14 OS=Homo sapiens GN=KRT14 PE=1 SV=4	0	87.004	36.8644	18	220	6	1	472	51.5	5.16	High	High	High	Peak Found	Peak Found	Not Found		0.01	0.012	0.01	198.3	197.6	200	1.7	2.4		2.268	10	234.72	18	2344	18
FALSE	High	IsMasterProtein	ch20i_P23526	Adenosylhomocysteinase OS=Homo sapiens GN=AHCY PE=1 SV=4	0	86.52	25.9259	11	109	11	1	432	47.7	6.34	High	High	High	High	High	High		0.165	0.172	0.164	171.6	170.7	171.8	28.4	29.3	28.2	5.31	0	125.32	11	1145	10
FALSE	High	IsMasterProtein	ch19i_P12955	Xaa-Pro dipeptidase OS=Homo sapiens GN=PEPD PE=1 SV=3	0	86.335	25.5578	9	77	9	1	493	54.5	6	High	High	High	High	High	High	Acetyl [N-Term]	0.293	0.286	0.281	154.7	155.5	156.1	45.3	44.5	43.9	1.894	0	95.33	8	1439	9
FALSE	High	IsMasterProtein	ch20i_O75882	Attractin OS=Homo sapiens GN=ATRN PE=1 SV=2	0	86.016	9.23723	13	107	13	1	1429	158.4	7.31	High	High	High	High	High	High		6.456	7.676	7.787	26.8	23.1	22.8	173.2	176.9	177.2	0.778	0	136.13	13	1507	11
FALSE	High	IsMasterProtein	A0A140VJC8	Testicular tissue protein Li 2 OS=Homo sapiens PE=2 SV=1	0	85.831	15.5844	9	108	9	1	770	86.9	4.82	Peak Found	Peak Found	Peak Found	High	High	High		21.175	23.336	18.029	9	8.2	10.5	191	191.8	189.5	0.901	0	169.28	9	1521	9
FALSE	High	IsMasterProtein	P06865	Beta-hexosaminidase subunit alpha OS=Homo sapiens GN=HEXA PE=1 SV=2	0	85.462	26.276	11	84	1	1	529	60.7	5.16	Not Found	Not Found	Not Found	High	High	Not Found		100						200			2.594	0	99.42	11	1201	11
FALSE	High	IsMasterProtein	ch10i_P17174	Aspartate aminotransferase, cytoplasmic OS=Homo sapiens GN=GOT1 PE=1 SV=3	0	83.515	37.2881	10	59	10	1	413	46.2	7.01	High	High	High	High	High	Peak Found		0.155	0.17	0.168	173.1	170.9	171.3	26.9	29.1	28.7	2.3	0	70.76	9	1128	10
FALSE	High	IsMasterProtein	H0YA55	Serum albumin (Fragment) OS=Homo sapiens GN=ALB PE=1 SV=1	0	83.305	16.5198	11	938	2	1	454	51.5	6.95	High	High	Not Found	Not Found	Not Found	Not Found	Acetyl [N-Term]	0.01	0.01	0.01	200	200	200	0		0	3.642	12	599.25	9	10031	9
FALSE	High	IsMasterProtein	ch06i_P07437	Tubulin beta chain OS=Homo sapiens GN=TUBB PE=1 SV=2	0	83.24	40.5405	12	69	4	1	444	49.6	4.89	High	High	High	High	Peak Found	High		0.144	0.157	0.128	174.8	172.8	177.3	25.2	27.2	22.7	3.489	8	89.29	12	887	12
FALSE	High	IsMasterProtein	A0A109NGN6	Proteasome subunit alpha type OS=Homo sapiens PE=2 SV=1	0	82.829	39.4191	8	96	8	1	241	26.4	4.79	High	High	High	High	High	High		0.136	0.134	0.133	176	176.3	176.5	24	23.7	23.5	22.101	0	111.85	8	1717	8
FALSE	High	IsMasterProtein	Q13707	ACTA2 protein (Fragment) OS=Homo sapiens GN=ACTA2 PE=3 SV=1	0	82.385	27.5758	7	218	1	1	330	36.8	5.35	Not Found	Not Found	Not Found	Not Found	Not Found	Not Found											6.079	0	219.31	7	2612	7
FALSE	High	IsMasterProtein	ch17i_Q13867	Bleomycin hydrolase OS=Homo sapiens GN=BLMH PE=1 SV=1	0	81.87	12.967	6	102	6	1	455	52.5	6.27	High	High	High	High	High	High		0.168	0.174	0.181	171.3	170.3	169.4	28.7	29.7	30.6	2.433	0	131.24	6	1025	6
FALSE	High	IsMasterProtein	B2RDE1	cDNA, FLJ96568, highly similar to Homo sapiens tropomyosin 3 (TPM3), mRNA OS=Homo sapiens PE=2 SV=1	0	81.422	47.5806	12	84	8	1	248	29	4.75	High	High	High	High	High	Peak Found	Acetyl [N-Term]	0.175	0.16	0.171	170.2	172.5	170.8	29.8	27.5	29.2	6.305	4	89.4	10	841	12
FALSE	High	IsMasterProtein	Q16881	Thioredoxin reductase 1, cytoplasmic OS=Homo sapiens GN=TXNRD1 PE=1 SV=3	0	81.289	20.339	9	72	9	1	649	70.9	7.39	High	High	High	High	High	High		0.13	0.119	0.135	177	178.7	176.2	23	21.3	23.8	1.336	0	109.98	9	1185	9
FALSE	High	IsMasterProtein	ch02u_P62979	Ubiquitin-40S ribosomal protein S27a OS=Homo sapiens GN=RPS27A PE=1 SV=2	0	81.233	39.1026	7	153	7	1	156	18	9.64	High	High	High	High	High	High		0.822	0.848	0.816	109.8	108.2	110.2	90.2	91.8	89.8	27.48	0	140.71	7	1898	7
FALSE	High	IsMasterProtein	P15531-2	Isoform 2 of Nucleoside diphosphate kinase A OS=Homo sapiens GN=NME1	0	80.75	47.4576	9	190	1	1	177	19.6	5.58	High	High	High	High	High	Peak Found		0.176	0.175	0.183	170.1	170.2	169.1	29.9	29.8	30.9	99	0	134.29	9	1659	9
FALSE	High	IsMasterProtein	ch05i_Q562R1	Beta-actin-like protein 2 OS=Homo sapiens GN=ACTBL2 PE=1 SV=2	0	79.968	20.4787	9	135	4	1	376	42	5.59	High	High	High	High	High	High		0.2	0.207	0.183	166.6	165.7	169.1	33.4	34.3	30.9	6.499	0	103.94	9	1755	8
FALSE	High	IsMasterProtein	ch01u_P52209	6-phosphogluconate dehydrogenase, decarboxylating OS=Homo sapiens GN=PGD PE=1 SV=3	0	79.894	23.3954	10	84	10	1	483	53.1	7.23	High	High	High	High	High	High		0.245	0.234	0.231	160.7	162.1	162.4	39.3	37.9	37.6	2.687	0	81.96	10	1122	10
FALSE	High	IsMasterProtein	B2RBR9	cDNA, FLJ95650, highly similar to Homo sapiens karyopherin (importin) beta 1 (KPNB1), mRNA OS=Homo sapiens PE=2 SV=1	0	79.698	11.6438	7	79	7	1	876	97.1	4.78	High	High	High	High	High	High	Acetyl [N-Term]	0.234	0.261	0.244	162	158.5	160.8	38	41.5	39.2	1.081	0	103.72	7	1266	7
FALSE	High	IsMasterProtein	ch21i_P39060	Collagen alpha-1(XVIII) chain OS=Homo sapiens GN=COL18A1 PE=1 SV=5	0	79.438	8.15279	10	116	10	1	1754	178.1	6.01	High	High	High	High	High	High		4.526	4.505	4.004	36.2	36.3	40	163.8	163.7	160	0.614	0	130.59	10	1308	10
FALSE	High	IsMasterProtein	A0A024R0A1	Macrophage colony-stimulating factor 1 OS=Homo sapiens GN=CSF1 PE=4 SV=1	0	78.436	11.7329	6	80	6	1	554	60.1	5.29	High	High	High	High	High	High		6.387	6.28	6.031	27.1	27.5	28.4	172.9	172.5	171.6	1.754	0	106.52	6	1157	6
FALSE	High	IsMasterProtein	ch17u_Q32Q12	Nucleoside diphosphate kinase OS=Homo sapiens GN=NME1-NME2 PE=1 SV=1	0	78.339	49.3151	10	187	2	1	292	32.6	8.48	High	High	High	Peak Found	Peak Found	Peak Found		0.149	0.151	0.152	174.1	173.7	173.6	25.9	26.3	26.4	11.452	10	129.45	10	1574	10
FALSE	High	IsMasterProtein	B4DKV4	cDNA FLJ60647, highly similar to Keratin, type II cytoskeletal 6B OS=Homo sapiens PE=2 SV=1	0	76.697	26.4259	14	263	0	1	526	55.7	8.43	Not Found	Not Found	Not Found	Not Found	Not Found	Not Found											2.162	0	265.47	14	3089	14
FALSE	High	IsMasterProtein	O15143	Actin-related protein 2/3 complex subunit 1B OS=Homo sapiens GN=ARPC1B PE=1 SV=3	0	75.093	28.4946	8	83	8	1	372	40.9	8.35	High	High	High	High	Peak Found	High		0.227	0.269	0.292	163	157.6	154.8	37	42.4	45.2	5.158	0	102.58	8	1134	8
FALSE	High	IsMasterProtein	V9HWB4	Epididymis secretory sperm binding protein Li 89n OS=Homo sapiens GN=HEL-S-89n PE=2 SV=1	0	74.847	18.8073	9	51	9	1	654	72.3	5.16	High	High	High	Peak Found	Peak Found	Peak Found		0.078	0.101	0.075	185.5	181.7	186	14.5	18.3	14	0.962	0	69.2	9	776	9
FALSE	High	IsMasterProtein	B4DUP2	cDNA FLJ56155, highly similar to UTP--glucose-1-phosphate uridylyltransferase 2 (EC 2.7.7.9) OS=Homo sapiens PE=2 SV=1	0	74.67	24.1779	11	84	11	1	517	57.8	8.13	High	High	High	High	High	High		0.229	0.235	0.23	162.7	162	162.6	37.3	38	37.4	2.398	0	88.38	11	786	11
FALSE	High	IsMasterProtein	B4DJQ8	cDNA FLJ55694, highly similar to Dipeptidyl-peptidase 1 (EC 3.4.14.1) OS=Homo sapiens PE=2 SV=1	0	73.377	22.6457	9	87	9	1	446	50.1	6.99	High	High	High	High	High	High		9.715	9.904	9.457	18.7	18.3	19.1	181.3	181.7	180.9	2.481	0	116.14	9	1234	8
FALSE	High	IsMasterProtein	ch01i_P28070	Proteasome subunit beta type-4 OS=Homo sapiens GN=PSMB4 PE=1 SV=4	0	73.251	32.197	6	79	6	1	264	29.2	5.97	High	High	High	High	High	High		0.148	0.15	0.156	174.1	174	173	25.9	26	27	11.328	0	88.61	6	1240	6
FALSE	High	IsMasterProtein	P05556	Integrin beta-1 OS=Homo sapiens GN=ITGB1 PE=1 SV=2	0	73.049	17.0426	10	65	10	1	798	88.4	5.39	High	High	High	Peak Found	High	Peak Found		0.117	0.134	0.127	179	176.3	177.4	21	23.7	22.6	1.239	0	74.53	10	929	9
FALSE	High	IsMasterProtein	ch03i_Q8WUM4-2	Isoform 2 of Programmed cell death 6-interacting protein OS=Homo sapiens GN=PDCD6IP	0	72.491	16.7239	11	50	11	1	873	96.7	6.52	High	High	High	Peak Found	High	High	Acetyl [N-Term]	0.247	0.3	0.369	160.4	153.9	146.1	39.6	46.1	53.9	0.874	0	52.7	10	601	11
FALSE	High	IsMasterProtein	ch11i_Q06481	Amyloid-like protein 2 OS=Homo sapiens GN=APLP2 PE=1 SV=2	0	72.154	11.6645	9	75	9	1	763	86.9	4.79	Peak Found	Peak Found	Peak Found	High	High	High		19.376	15.465	8.982	9.8	12.1	20	190.2	187.9	180	1.015	0	75.54	9	733	9
FALSE	High	IsMasterProtein	Q6NS36	Ferritin (Fragment) OS=Homo sapiens GN=FTH1 PE=2 SV=1	0	72.12	24.1379	6	164	6	1	232	26.2	6.52	High	High	High	High	High	High		1.155	1.199	1.126	92.8	91	94.1	107.2	109	105.9	12.594	0	75.18	6	767	6
FALSE	High	IsMasterProtein	P13647	Keratin, type II cytoskeletal 5 OS=Homo sapiens GN=KRT5 PE=1 SV=3	0	70.165	26.7797	17	251	10	1	590	62.3	7.74	High	High	High	Not Found	Not Found	Peak Found		0.01	0.01	0.01	200	200	199.1			0.9	2.728	0	210.15	17	2050	17
FALSE	High	IsMasterProtein	Q02809-2	Isoform 2 of Procollagen-lysine,2-oxoglutarate 5-dioxygenase 1 OS=Homo sapiens GN=PLOD1	0	69.881	16.9251	9	60	9	1	774	88.2	7.11	High	High	High	High	High	High		0.517	0.384	0.466	131.8	144.5	136.4	68.2	55.5	63.6	0.943	0	62.08	9	332	9
FALSE	High	IsMasterProtein	ch02u_O15144	Actin-related protein 2/3 complex subunit 2 OS=Homo sapiens GN=ARPC2 PE=1 SV=1	0	69.05	26.6667	9	88	9	1	300	34.3	7.36	High	High	High	High	High	High		0.183	0.228	0.204	169	162.8	166.2	31	37.2	33.8	3.062	0	88.64	9	755	9
FALSE	High	IsMasterProtein	ch01i_Q8NBP7	Proprotein convertase subtilisin/kexin type 9 OS=Homo sapiens GN=PCSK9 PE=1 SV=3	0	68.559	11.8497	5	60	5	1	692	74.2	6.61	Peak Found	Not Found	Peak Found	High	High	High		100	100	100	1.6		0.8	198.4	200	199.2	0.931	0	95.03	5	1209	5
FALSE	High	IsMasterProtein	Q9NZV1	Cysteine-rich motor neuron 1 protein OS=Homo sapiens GN=CRIM1 PE=1 SV=1	0	68.212	11.39	9	46	9	1	1036	113.7	5.21	Peak Found	Peak Found	Peak Found	High	High	High		33.285	25.514	100	5.8	7.5	1.4	194.2	192.5	198.6	0.66	0	58.54	9	603	9
FALSE	High	IsMasterProtein	P00558	Phosphoglycerate kinase 1 OS=Homo sapiens GN=PGK1 PE=1 SV=3	0	68.046	25.6595	7	38	7	1	417	44.6	8.1	High	High	High	Peak Found	Peak Found	High		0.192	0.141	0.178	167.8	175.3	169.8	32.2	24.7	30.2	0.848	0	61.01	7	813	7
FALSE	High	IsMasterProtein	ch15u_P25789	Proteasome subunit alpha type-4 OS=Homo sapiens GN=PSMA4 PE=1 SV=1	0	67.735	30.2682	8	147	8	1	261	29.5	7.72	High	High	High	High	High	High		0.134	0.134	0.136	176.4	176.3	176	23.6	23.7	24	7.577	0	151.4	8	1796	8
FALSE	High	IsMasterProtein	V9HW88	Calreticulin, isoform CRA_b OS=Homo sapiens GN=HEL-S-99n PE=2 SV=1	0	67.676	19.4245	6	42	6	1	417	48.1	4.44	High	High	High	High	Peak Found	High		0.174	0.169	0.175	170.3	171	170.2	29.7	29	29.8	1.649	0	63.77	6	738	6
FALSE	High	IsMasterProtein	ch17i_P49720	Proteasome subunit beta type-3 OS=Homo sapiens GN=PSMB3 PE=1 SV=2	0	67.485	29.7561	8	106	8	1	205	22.9	6.55	High	High	High	High	High	High		0.153	0.154	0.155	173.4	173.4	173.2	26.6	26.6	26.8	76.426	0	83.11	8	913	8
FALSE	High	IsMasterProtein	ch10i_P18669	Phosphoglycerate mutase 1 OS=Homo sapiens GN=PGAM1 PE=1 SV=2	0	67.088	34.6457	6	62	6	1	254	28.8	7.18	High	High	High	Peak Found	Peak Found	High		0.13	0.134	0.142	176.9	176.4	175.1	23.1	23.6	24.9	4.412	0	87.64	6	803	6
FALSE	High	IsMasterProtein	O00469-2	Isoform 2 of Procollagen-lysine,2-oxoglutarate 5-dioxygenase 2 OS=Homo sapiens GN=PLOD2	0	66.232	13.9842	8	61	8	1	758	87	6.71	High	High	High	High	High	High		0.719	0.512	0.527	116.3	132.3	131	83.7	67.7	69	0.848	0	82.24	8	1064	8
FALSE	High	IsMasterProtein	P67936	Tropomyosin alpha-4 chain OS=Homo sapiens GN=TPM4 PE=1 SV=3	0	66.119	38.3065	10	64	6	1	248	28.5	4.69	High	High	High	Peak Found	Peak Found	Peak Found	Acetyl [N-Term]	0.152	0.14	0.147	173.6	175.5	174.4	26.4	24.5	25.6	3.642	0	66.56	8	695	10
FALSE	High	IsMasterProtein	A8K5A4	cDNA FLJ76826, highly similar to Homo sapiens ceruloplasmin (ferroxidase) (CP), mRNA OS=Homo sapiens PE=2 SV=1	0	64.297	12.5822	8	44	8	1	1065	122.1	5.74	High	Peak Found	Peak Found	High	High	High		18.312	14.152	25.148	10.4	13.2	7.6	189.6	186.8	192.4	0.52	0	66.71	8	841	8
FALSE	High	IsMasterProtein	H0YMD1	Low-density lipoprotein receptor OS=Homo sapiens GN=LDLR PE=1 SV=1	0	64.163	12.2363	9	56	9	1	948	104.7	5.5	High	Peak Found	High	High	High	High		2.863	6.975	3.179	51.8	25.1	47.9	148.2	174.9	152.1	0.817	0	66.74	9	621	9
FALSE	High	IsMasterProtein	A0A024R962	HCG40889, isoform CRA_b OS=Homo sapiens GN=hCG_40889 PE=4 SV=1	0	62.882	14.3786	13	64	13	1	1231	139	6.62	Peak Found	Peak Found	Peak Found	High	High	High		92.015	99.543	73.77	2.2	2	2.7	197.8	198	197.3	0.596	0	73.45	13	706	13
FALSE	High	IsMasterProtein	B7Z2N5	cDNA FLJ51840, highly similar to Alpha-actinin-2 OS=Homo sapiens PE=2 SV=1	0	62.789	15.193	10	128	1	1	803	92.9	5.81	Not Found	Not Found	High	Not Found	Not Found	Not Found				0.01			200				0.675	0	151	9	1410	10
FALSE	High	IsMasterProtein	B7Z6L0	Annexin OS=Homo sapiens PE=2 SV=1	0	62.549	15.3719	8	43	8	1	605	65.6	8.27	High	High	High	High	High	High		0.485	0.489	0.487	134.7	134.3	134.5	65.3	65.7	65.5	1.471	0	58.87	8	688	8
FALSE	High	IsMasterProtein	B3KNB4	cDNA FLJ14168 fis, clone NT2RP2001440, highly similar to 14-3-3 protein gamma OS=Homo sapiens PE=2 SV=1	0	60.984	31.1741	8	135	5	1	247	28.2	4.89	High	High	High	High	High	High	Acetyl [N-Term]	0.173	0.175	0.177	170.5	170.2	170	29.5	29.8	30	6.743	0	111.39	7	1528	8
FALSE	High	IsMasterProtein	A0A024RA52	Proteasome subunit alpha type OS=Homo sapiens GN=PSMA2 PE=1 SV=1	0	60.376	26.4957	5	51	5	1	234	25.9	7.43	High	High	High	High	High	High		0.149	0.144	0.158	174.1	174.8	172.7	25.9	25.2	27.3	6.017	0	44.52	5	735	5
FALSE	High	IsMasterProtein	ch02i_P40925-3	Isoform 3 of Malate dehydrogenase, cytoplasmic OS=Homo sapiens GN=MDH1	0	58.811	22.4432	5	50	5	1	352	38.6	7.71	High	High	High	High	High	High		0.222	0.216	0.209	163.7	164.5	165.5	36.3	35.5	34.5	1.089	0	68.85	5	1144	5
FALSE	High	IsMasterProtein	ch09i_P68371	Tubulin beta-4B chain OS=Homo sapiens GN=TUBB4B PE=1 SV=1	0	58.544	29.6629	9	43	1	1	445	49.8	4.89	Not Found	High	High	Not Found	Peak Found	Peak Found			0.179	0.189		169.6	168.3		30.4	31.7	2.008	0	59.63	9	575	9
FALSE	High	IsMasterProtein	P15121	Aldose reductase OS=Homo sapiens GN=AKR1B1 PE=1 SV=3	0	58.501	36.0759	7	50	7	1	316	35.8	6.98	High	High	High	Not Found	Peak Found	High		0.01	0.141	0.121	200	175.3	178.4		24.7	21.6	2.34	0	64.66	7	494	7
FALSE	High	IsMasterProtein	D3DQU2	Tripeptidyl peptidase I, isoform CRA_a OS=Homo sapiens GN=TPP1 PE=4 SV=1	0	58.184	26.9231	8	48	8	1	572	62.2	6.65	Peak Found	Peak Found	Not Found	High	High	High		60.087	74.298	100	3.3	2.7		196.7	197.3	200	0.978	0	77.84	8	586	8
FALSE	High	IsMasterProtein	A8K9C4	Elongation factor 1-alpha OS=Homo sapiens PE=2 SV=1	0	57.989	32.684	11	82	11	1	462	50.2	9.01	High	High	High	High	Peak Found	High		0.098	0.088	0.096	182.2	183.7	182.5	17.8	16.3	17.5	2.311	0	98.73	11	759	11
FALSE	High	IsMasterProtein	B1AHL2	Fibulin-1 OS=Homo sapiens GN=FBLN1 PE=1 SV=1	0	57.831	15.1179	6	69	3	1	721	78.3	5.39	High	High	High	High	High	High		9.265	6.54	11.17	19.5	26.5	16.4	180.5	173.5	183.6	0.725	2	105.43	6	987	6
FALSE	High	IsMasterProtein	ch11u_A6NMH8	Tetraspanin OS=Homo sapiens GN=CD81 PE=1 SV=1	0	57.751	18.6131	3	50	3	1	274	29.8	6.92	High	High	High	High	High	High		0.929	0.943	0.977	103.7	102.9	101.2	96.3	97.1	98.8	6.943	0	52.47	3	860	3
FALSE	High	IsMasterProtein	ch01i_Q06830	Peroxiredoxin-1 OS=Homo sapiens GN=PRDX1 PE=1 SV=1	0	57.718	41.7085	10	87	8	1	199	22.1	8.13	High	High	High	High	High	High		0.215	0.203	0.235	164.6	166.2	162	35.4	33.8	38	12.895	2	77.06	10	682	10
FALSE	High	IsMasterProtein	ch20u_P48637	Glutathione synthetase OS=Homo sapiens GN=GSS PE=1 SV=1	0	57.464	19.1983	6	38	6	1	474	52.4	5.92	High	High	High	High	High	Peak Found	Acetyl [N-Term]	0.142	0.16	0.198	175.1	172.4	166.9	24.9	27.6	33.1	1.009	0	39.81	5	750	6
FALSE	High	IsMasterProtein	ch11i_P37837	Transaldolase OS=Homo sapiens GN=TALDO1 PE=1 SV=2	0	56.13	28.1899	9	63	9	1	337	37.5	6.81	High	High	High	High	High	Peak Found		0.293	0.303	0.268	154.6	153.5	157.7	45.4	46.5	42.3	2.831	0	65.44	9	623	9
FALSE	High	IsMasterProtein	ch17i_Q9UBG0	C-type mannose receptor 2 OS=Homo sapiens GN=MRC2 PE=1 SV=2	0	55.723	5.6119	5	42	5	1	1479	166.6	5.83	High	High	High	High	High	High		1.069	1.079	1.012	96.7	96.2	99.4	103.3	103.8	100.6	0.468	0	51.99	5	655	5
FALSE	High	IsMasterProtein	B4E284	cDNA FLJ51188, highly similar to N-acetylglucosamine-6-sulfatase (EC3.1.6.14) OS=Homo sapiens PE=2 SV=1	0	54.963	21.2329	10	80	10	1	584	65.8	8.07	High	High	High	High	High	High		6.248	5.54	6.481	27.6	30.6	26.7	172.4	169.4	173.3	1.829	0	88.53	10	761	10
FALSE	High	IsMasterProtein	B5BUB1	RuvB-like helicase (Fragment) OS=Homo sapiens GN=RUVBL1 PE=2 SV=1	0	54.413	22.1491	7	49	7	1	456	50.2	6.42	High	High	High	High	High	High		0.174	0.221	0.216	170.3	163.7	164.5	29.7	36.3	35.5	1.61	0	61.92	7	480	7
FALSE	High	IsMasterProtein	D3DRR6	Inter-alpha (Globulin) inhibitor H2, isoform CRA_a OS=Homo sapiens GN=ITIH2 PE=4 SV=1	0	53.757	5.59662	6	154	6	1	947	106.5	6.95	High	High	High	Not Found	Not Found	Peak Found		0.01	0.01	0.01	200	200	199.8			0.2	0.509	0	180.33	6	2384	6
FALSE	High	IsMasterProtein	ch19i_P01137	Transforming growth factor beta-1 OS=Homo sapiens GN=TGFB1 PE=1 SV=2	0	53.576	20.5128	9	50	9	1	390	44.3	8.53	High	High	High	High	High	High		1.179	1.21	1.197	91.8	90.5	91	108.2	109.5	109	2.675	0	44.31	9	427	9
FALSE	High	IsMasterProtein	ch01u_Q5VW32	BRO1 domain-containing protein BROX OS=Homo sapiens GN=BROX PE=1 SV=1	0	53.267	24.8175	6	37	6	1	411	46.4	7.65	High	High	High	High	Peak Found	High		0.502	0.431	0.457	133.1	139.8	137.3	66.9	60.2	62.7	1.555	0	42.45	6	644	6
FALSE	High	IsMasterProtein	V9HW63	Epididymis secretory sperm binding protein Li 97n OS=Homo sapiens GN=HEL-S-97n PE=2 SV=1	0	52.688	24.3542	6	64	4	1	271	30.5	6.29	High	High	High	High	High	High		0.138	0.127	0.122	175.7	177.4	178.2	24.3	22.6	21.8	4.412	0	65.69	6	724	6
FALSE	High	IsMasterProtein	Q5VXV3	SET OS=Homo sapiens GN=SET PE=2 SV=1	0	52.554	25.5172	8	57	8	1	290	33.5	4.32	High	High	High	High	High	High		0.188	0.195	0.191	168.3	167.4	167.9	31.7	32.6	32.1	11.115	0	64.27	8	461	8
FALSE	High	IsMasterProtein	K4TZQ2	MHC class I antigen (Fragment) OS=Homo sapiens GN=HLA-A PE=3 SV=1	0	51.485	12.8205	3	9	1	1	273	31.6	6.47	Not Found	Not Found	High	Not Found	Not Found	Not Found											0.668	0			107	3
FALSE	High	IsMasterProtein	ch02u_P0CG39	POTE ankyrin domain family member J OS=Homo sapiens GN=POTEJ PE=3 SV=1	0	51.464	4.81696	5	60	2	1	1038	117.3	5.97	Not Found	Not Found	Not Found	Not Found	Not Found	Not Found											0.486	0	65.75	5	846	5
FALSE	High	IsMasterProtein	A5PLM9	Cathepsin L1 OS=Homo sapiens GN=CTSL1 PE=2 SV=1	0	51.086	20.1201	9	73	9	1	333	37.5	5.45	High	Peak Found	High	High	High	High		11.13	11.83	11.657	16.5	15.6	15.8	183.5	184.4	184.2	9	0	72.09	9	1146	8
FALSE	High	IsMasterProtein	ch10u_A0A0A0MSS8	Aldo-keto reductase family 1 member C3 OS=Homo sapiens GN=AKR1C3 PE=1 SV=1	0	50.95	38.6997	9	56	6	1	323	36.8	7.94	High	High	High	Peak Found	Peak Found	Peak Found		0.272	0.341	0.255	157.2	149.1	159.4	42.8	50.9	40.6	2.511	2	73.91	9	696	8
FALSE	High	IsMasterProtein	A0A0U5LWB3	MHC class I antigen (Fragment) OS=Homo sapiens GN=HLA-C PE=3 SV=1	0	50.545	17.9487	3	24	2	1	273	31.6	5.82	Peak Found	High	High	High	Peak Found	High			0.903			105.1			94.9		0.311	0	27.73	1	141	3
FALSE	High	IsMasterProtein	Q13332-2	Isoform PTPS-MEA of Receptor-type tyrosine-protein phosphatase S OS=Homo sapiens GN=PTPRS	0	50.313	9.12842	9	29	9	1	1939	215.8	6.49	Peak Found	High	Peak Found	High	High	High		5.189	10.154	4.94	32.3	17.9	33.7	167.7	182.1	166.3	0.253	0	38.58	8	387	9
FALSE	High	IsMasterProtein	A0A1C3PHW3	MHC class I antigen OS=Homo sapiens GN=HLA-C PE=3 SV=1	0	50.26	13.388	3	21	1	1	366	40.6	6.2	Not Found	Not Found	Not Found	Not Found	High	Not Found											0.438	0	32.89	3	132	3
FALSE	High	IsMasterProtein	P01023	Alpha-2-macroglobulin OS=Homo sapiens GN=A2M PE=1 SV=3	0	50.143	6.78426	8	347	5	1	1474	163.2	6.46	High	High	High	Peak Found	Peak Found	Peak Found		0.01	0.01	0.01	200	200	199.9	0	0	0.1	0.401	5	302.36	8	3937	8
FALSE	High	IsMasterProtein	B2R758	cDNA, FLJ93295, highly similar to Homo sapiens glucosaminyl (N-acetyl) transferase 3, mucin type (GCNT3), mRNA OS=Homo sapiens PE=2 SV=1	0	50.021	21.2329	7	35	7	1	438	50.9	8.25	High	High	Peak Found	High	High	High		10.763	9.028	7.183	17	19.9	24.4	183	180.1	175.6	0.911	0	37.97	7	408	7
FALSE	High	IsMasterProtein	ch10u_P00367	Glutamate dehydrogenase 1, mitochondrial OS=Homo sapiens GN=GLUD1 PE=1 SV=2	0	49.726	19.8925	9	59	9	1	558	61.4	7.8	High	High	High	Peak Found	Peak Found	Peak Found		0.068	0.135	0.074	187.3	176.2	186.2	12.7	23.8	13.8	0.896	0	79.68	9	914	8
FALSE	High	IsMasterProtein	P07093-3	Isoform 3 of Glia-derived nexin OS=Homo sapiens GN=SERPINE2	0	49.66	16.8704	6	50	1	1	409	45.2	9.22	Peak Found	Peak Found	Not Found	High	High	Not Found		16.009	15.752	23.179	11.8	11.9	8.3	188.2	188.1	191.7	2.34	7	59.11	6	656	6
FALSE	High	IsMasterProtein	ch12i_G8JLH6	Tetraspanin (Fragment) OS=Homo sapiens GN=CD9 PE=1 SV=1	0	49.029	10.5263	4	145	4	1	228	25.4	6.52	High	High	High	High	High	High		0.545	0.527	0.521	129.5	131	131.5	70.5	69	68.5	26.826	0	176.42	4	1581	4
FALSE	High	IsMasterProtein	chXu_P06280	Alpha-galactosidase A OS=Homo sapiens GN=GLA PE=1 SV=1	0	48.331	25.1748	9	55	9	1	429	48.7	5.6	Peak Found	Peak Found	High	High	High	High		9.062	7.848	9.613	19.9	22.6	18.8	180.1	177.4	181.2	1.276	0	59.9	9	576	9
FALSE	High	IsMasterProtein	ch06i_X5D2R7	Proteasome subunit beta type OS=Homo sapiens GN=PSM8 PE=1 SV=1	0	47.855	18.4783	4	65	4	1	276	30.3	7.74	High	High	High	High	High	High		0.171	0.168	0.189	170.9	171.2	168.3	29.1	28.8	31.7	2.162	0	67.75	4	783	4
FALSE	High	IsMasterProtein	A8K4K1	cDNA FLJ78216, highly similar to Homo sapiens lysosomal neuraminidase, mRNA OS=Homo sapiens PE=2 SV=1	0	47.315	19.2771	7	65	7	1	415	45.3	5.88	Peak Found	Peak Found	Peak Found	High	High	High		40.261	30.798	26.342	4.8	6.3	7.3	195.2	193.7	192.7	1.462	0	66.32	7	597	7
FALSE	High	IsMasterProtein	A8K3B0	cDNA FLJ77877, highly similar to Human ENO2 neuron specific (gamma) enolase OS=Homo sapiens PE=2 SV=1	0	47.231	17.9724	6	37	5	1	434	47.3	5.03	High	High	High	High	High	Peak Found		0.181	0.01	0.1	169.3	200	181.8	30.7		18.2	0.978	0	49.44	6	676	6
FALSE	High	IsMasterProtein	B7Z7F0	cDNA FLJ56420, highly similar to Aspartyl aminopeptidase (EC 3.4.11.21) OS=Homo sapiens PE=2 SV=1	0	47.156	20.8925	7	51	7	1	493	54.5	7.72	High	High	High	High	Peak Found	Peak Found		0.128	0.051	0.037	177.3	190.3	192.8	22.7	9.7	7.2	1.555	0	56.88	7	471	7
FALSE	High	IsMasterProtein	ch01i_Q6PCB0	von Willebrand factor A domain-containing protein 1 OS=Homo sapiens GN=VWA1 PE=1 SV=1	0	46.839	18.427	5	36	5	1	445	46.8	7.68	Peak Found	Peak Found	Peak Found	High	High	High		7.599	6.607	10.214	23.3	26.3	17.8	176.7	173.7	182.2	1.154	0	59.68	5	455	5
FALSE	High	IsMasterProtein	O00391	Sulfhydryl oxidase 1 OS=Homo sapiens GN=QSOX1 PE=1 SV=3	0	46.768	13.6546	7	44	7	1	747	82.5	8.92	Peak Found	Not Found	Peak Found	High	High	High		15.605	100	24.964	12		7.7	188	200	192.3	0.501	0	64.16	7	1001	7
FALSE	High	IsMasterProtein	ch06u_Q9BTY2	Plasma alpha-L-fucosidase OS=Homo sapiens GN=FUCA2 PE=1 SV=2	0	46.599	19.4861	7	40	7	1	467	54	6.25	High	High	High	High	High	High		9.878	8.031	8.665	18.4	22.1	20.7	181.6	177.9	179.3	0.848	0	53.6	7	662	7
FALSE	High	IsMasterProtein	ch09i_P27105	Erythrocyte band 7 integral membrane protein OS=Homo sapiens GN=STOM PE=1 SV=3	0	46.339	23.2639	7	59	7	1	288	31.7	7.88	High	High	High	High	High	High		0.585	0.568	0.582	126.2	127.5	126.4	73.8	72.5	73.6	2.594	0	50.21	7	873	7
FALSE	High	IsMasterProtein	A8K8N7	Phosphoribosylformylglycinamidine synthase (FGAR amidotransferase), isoform CRA_b OS=Homo sapiens GN=PFAS PE=2 SV=1	0	46.245	11.8834	10	44	10	1	1338	144.6	5.76	High	High	High	Peak Found	Peak Found	Peak Found		0.179	0.167	0.172	169.6	171.4	170.6	30.4	28.6	29.4	0.396	0	60.63	10	509	9
FALSE	High	IsMasterProtein	ch11u_P16070	CD44 antigen OS=Homo sapiens GN=CD44 PE=1 SV=3	0	46.086	6.33423	5	83	5	1	742	81.5	5.33	High	High	High	High	High	High		0.17	0.203	0.185	170.9	166.2	168.8	29.1	33.8	31.2	0.968	0	88.22	5	923	5
FALSE	High	IsMasterProtein	ch02u_P10809	60 kDa heat shock protein, mitochondrial OS=Homo sapiens GN=HSPD1 PE=1 SV=2	0	45.984	15.3578	6	34	6	1	573	61	5.87	High	High	High	Not Found	Not Found	Not Found		0.01	0.01	0.01	200	200	200				0.565	0	44.88	6	667	6
FALSE	High	IsMasterProtein	ch20u_X6R8A1	Carboxypeptidase OS=Homo sapiens GN=CTSA PE=1 SV=1	0	45.685	17.2691	6	41	6	1	498	56.2	6.61	High	High	High	High	High	High		0.945	2.239	1.74	102.8	61.7	73	97.2	138.3	127	0.905	0	46.87	6	628	6
FALSE	High	IsMasterProtein	ch09i_A0A0D9SGF6	Spectrin alpha chain, non-erythrocytic 1 OS=Homo sapiens GN=SPTAN1 PE=1 SV=1	0	44.562	4.72378	8	28	8	1	2498	287.4	5.36	High	High	High	Peak Found	Not Found	Peak Found		3.843	0.01	2.97	41.3	200	50.4	158.7		149.6	0.101	0	34.75	8	439	8
FALSE	High	IsMasterProtein	O00231-2	Isoform 2 of 26S proteasome non-ATPase regulatory subunit 11 OS=Homo sapiens GN=PSMD11	0	44.382	31.9149	10	48	10	1	423	47.5	6.48	High	High	High	Peak Found	Peak Found	Peak Found		0.176	0.155	0.153	170	173.2	173.5	30	26.8	26.5	1.054	0	55.92	10	531	8
FALSE	High	IsMasterProtein	P16035	Metalloproteinase inhibitor 2 OS=Homo sapiens GN=TIMP2 PE=1 SV=2	0	44.205	15.9091	3	29	3	1	220	24.4	7.49	Peak Found	Peak Found	Peak Found	High	High	High		11.424	14.309	10.865	16.1	13.1	16.9	183.9	186.9	183.1	1.512	0	33.36	3	475	3
FALSE	High	IsMasterProtein	D0W033	MHC class I antigen (Fragment) OS=Homo sapiens GN=HLA-A PE=3 SV=1	0	43.945	12.8205	2	16	1	1	273	31.6	5.94	Peak Found	High	High	High	Peak Found	High		0.762		0.852	113.5		108	86.5		92	0.501	0	27.73	1	107	2
FALSE	High	IsMasterProtein	A0A087WVC6	Receptor-type tyrosine-protein phosphatase eta OS=Homo sapiens GN=PTPRJ PE=1 SV=1	0	43.383	8.19672	7	36	7	1	1342	146.5	5.62	Peak Found	Peak Found	Peak Found	High	High	High		25.058	15.013	17.303	7.7	12.5	10.9	192.3	187.5	189.1	0.267	0	51.67	7	614	7
FALSE	High	IsMasterProtein	P61160-2	Isoform 2 of Actin-related protein 2 OS=Homo sapiens GN=ACTR2	0	43.29	18.0451	7	51	7	1	399	45.3	7.2	High	High	High	High	High	High		0.212	0.199	0.219	165	166.8	164	35	33.2	36	1.848	0	55.68	7	648	7
FALSE	High	IsMasterProtein	A0A140VJM0	Testicular tissue protein Li 96 OS=Homo sapiens PE=2 SV=1	0	43.183	7.32636	6	70	6	1	1051	116.5	6.77	High	High	High	High	High	High		0.207	0.212	0.207	165.7	165	165.8	34.3	35	34.2	0.734	0	57.87	6	522	6
FALSE	High	IsMasterProtein	B2R950	cDNA, FLJ94213, highly similar to Homo sapiens pregnancy-zone protein (PZP), mRNA OS=Homo sapiens PE=2 SV=1	0	42.81	4.04858	5	208	2	1	1482	163.8	6.38	High	High	High	Not Found	Peak Found	Not Found		0.01	0.01	0.01	200	199.2	200		0.8		0.334	0	181.9	5	1466	5
FALSE	High	IsMasterProtein	Q8NHP8	Putative phospholipase B-like 2 OS=Homo sapiens GN=PLBD2 PE=1 SV=2	0	42.807	9.50764	5	55	5	1	589	65.4	6.8	High	High	High	High	High	High		3.746	3.378	3.954	42.1	45.7	40.4	157.9	154.3	159.6	0.951	0	53.26	5	823	5
FALSE	High	IsMasterProtein	P02792	Ferritin light chain OS=Homo sapiens GN=FTL PE=1 SV=2	0	42.698	21.7143	4	73	4	1	175	20	5.78	High	High	High	High	High	High		0.796	0.848	0.849	111.3	108.2	108.2	88.7	91.8	91.8	2.831	0	63.57	4	932	4
FALSE	High	IsMasterProtein	Q6PKA6	ALDH3A1 protein (Fragment) OS=Homo sapiens GN=ALDH3A1 PE=2 SV=1	0	42.104	12.8906	5	40	5	1	512	57.5	7.28	High	High	High	High	High	High		0.352	0.407	0.437	147.9	142.1	139.2	52.1	57.9	60.8	1.031	0	54.18	5	489	5
FALSE	High	IsMasterProtein	Q13011	Delta(3,5)-Delta(2,4)-dienoyl-CoA isomerase, mitochondrial OS=Homo sapiens GN=ECH1 PE=1 SV=2	0	40.859	23.7805	7	59	7	1	328	35.8	8	High	High	High	High	High	High		0.082	0.086	0.08	184.9	184.1	185.2	15.1	15.9	14.8	2.162	0	32.02	7	459	7
FALSE	High	IsMasterProtein	A0A024R1K7	Tyrosine 3-monooxygenase/tryptophan 5-monooxygenase activation protein, eta polypeptide, isoform CRA_b OS=Homo sapiens GN=YWHAH PE=3 SV=1	0	40.252	26.8293	8	83	5	1	246	28.2	4.84	High	High	High	Peak Found	Peak Found	Peak Found	Acetyl [N-Term]	0.521	0.632	0.653	131.5	122.6	121	68.5	77.4	79	2.594	0	73.82	7	522	8
FALSE	High	IsMasterProtein	Q92598-4	Isoform 4 of Heat shock protein 105 kDa OS=Homo sapiens GN=HSPH1	0	40.242	12.2093	8	62	7	1	860	97.4	5.72	High	High	High	Peak Found	Peak Found	Peak Found		0.232	0.15	0.255	162.3	173.9	159.4	37.7	26.1	40.6	0.498	0	71.72	8	794	7
FALSE	High	IsMasterProtein	ch16i_P15559	NAD(P)H dehydrogenase [quinone] 1 OS=Homo sapiens GN=NQO1 PE=1 SV=1	0	40.215	22.2628	6	47	6	1	274	30.8	8.88	High	High	High	High	High	High		0.406	0.401	0.422	142.3	142.7	140.6	57.7	57.3	59.4	4.878	0	45.98	6	254	5
FALSE	High	IsMasterProtein	ch17i_Q04695	Keratin, type I cytoskeletal 17 OS=Homo sapiens GN=KRT17 PE=1 SV=2	0	40.203	15.7407	10	101	2	1	432	48.1	5.02	High	High	High	Not Found	Peak Found	Not Found		0.01	0.033	0.01	200	193.5	200		6.5		1.062	0	81.9	10	335	10
FALSE	High	IsMasterProtein	ch03i_Q06033	Inter-alpha-trypsin inhibitor heavy chain H3 OS=Homo sapiens GN=ITIH3 PE=1 SV=2	0	39.397	5.73034	5	58	5	1	890	99.8	5.74	High	High	High	Not Found	Not Found	Not Found		0.01	0.01	0.01	200	200	200				0.442	0	73.76	5	603	5
FALSE	High	IsMasterProtein	ch17i_P22692	Insulin-like growth factor-binding protein 4 OS=Homo sapiens GN=IGFBP4 PE=1 SV=2	0	39.09	22.8682	6	83	6	1	258	27.9	7.15	Peak Found	Peak Found	Peak Found	High	High	High		15.473	15.689	16.858	12.1	12	11.2	187.9	188	188.8	3.87	0	63.86	6	797	6
FALSE	High	IsMasterProtein	H0Y5A9	Basement membrane-specific heparan sulfate proteoglycan core protein (Fragment) OS=Homo sapiens GN=HSPG2 PE=1 SV=1	0	38.806	52.2843	5	28	1	1	197	20.5	5.81	Not Found	Not Found	Not Found	Not Found	Not Found	Not Found											6.499	0	20.84	4	417	5
FALSE	High	IsMasterProtein	ch05i_P35556	Fibrillin-2 OS=Homo sapiens GN=FBN2 PE=1 SV=3	0	38.597	4.25824	10	45	8	1	2912	314.6	4.86	Peak Found	Peak Found	Peak Found	High	High	High		10.078	10.412	6.124	18.1	17.5	28.1	181.9	182.5	171.9	0.181	2	37.02	10	409	10
FALSE	High	IsMasterProtein	ch07u_P05121	Plasminogen activator inhibitor 1 OS=Homo sapiens GN=SERPINE1 PE=1 SV=1	0	38.324	17.1642	5	39	5	1	402	45	7.2	High	High	High	High	High	High		2.844	2.992	2.789	52	50.1	52.8	148	149.9	147.2	1.015	0	30.25	5	472	5
FALSE	High	IsMasterProtein	ch09i_Q9Y490	Talin-1 OS=Homo sapiens GN=TLN1 PE=1 SV=3	0	38.229	4.40771	7	23	7	1	2541	269.6	6.07	High	High	High	Peak Found	Peak Found	Not Found		0.091	0.25	0.01	183.2	160	200	16.8	40		0.107	0	30.77	7	431	6
FALSE	High	IsMasterProtein	P23142	Fibulin-1 OS=Homo sapiens GN=FBLN1 PE=1 SV=4	0	37.443	9.53058	4	47	1	1	703	77.2	5.22	High	High	High	High	Peak Found	High		0.293	0.301	0.263	154.7	153.8	158.3	45.3	46.2	41.7	0.528	0	58.82	4	493	4
FALSE	High	IsMasterProtein	P22304	Iduronate 2-sulfatase OS=Homo sapiens GN=IDS PE=1 SV=1	0	37.364	13.2727	3	14	3	1	550	61.8	5.45	Not Found	Not Found	Peak Found	High	High	High		100	100	17.3			10.9	200	200	189.1	0.874	0	18.64	3	171	3
FALSE	High	IsMasterProtein	A0A024R451	Serpin peptidase inhibitor, clade E (Nexin, plasminogen activator inhibitor type 1), member 2, isoform CRA_a OS=Homo sapiens GN=SERPINE2 PE=3 SV=1	0	37.186	18.3417	6	44	1	1	398	44	9.29	Not Found	Peak Found	Not Found	High	High	High		100	33.36			5.8		200	194.2		1.565	0	45.77	6	600	6
FALSE	High	IsMasterProtein	C0JYY2	Apolipoprotein B (Including Ag(X) antigen) OS=Homo sapiens GN=APOB PE=4 SV=1	0	37.112	2.23537	10	44	10	1	4563	515.2	7.05	High	High	High	Not Found	Not Found	Not Found		0.01	0.01	0.01	200	200	200				0.08	0	41.16	10	374	10
FALSE	High	IsMasterProtein	B2RAQ9	Proteasome subunit beta type OS=Homo sapiens PE=2 SV=1	0	37.058	9.02527	5	60	5	1	277	29.9	7.68	High	High	High	High	High	High		0.182	0.162	0.145	169.3	172.2	174.6	30.7	27.8	25.4	6.197	0	63.56	5	117	5
FALSE	High	IsMasterProtein	B3KQF4	cDNA FLJ90373 fis, clone NT2RP2004606, highly similar to Metalloproteinase inhibitor 1 OS=Homo sapiens PE=2 SV=1	0	36.853	28.0193	4	33	4	1	207	23.2	8.1	High	High	High	High	High	High		11.02	10.275	11.255	16.6	17.7	16.3	183.4	182.3	183.7	3.329	0	32.63	4	418	4
FALSE	High	IsMasterProtein	B2R5M8	Isocitrate dehydrogenase [NADP] OS=Homo sapiens PE=2 SV=1	0	36.736	20.0483	7	36	7	1	414	46.6	7.01	High	High	High	High	High	High		0.433	0.484	0.443	139.6	134.8	138.6	60.4	65.2	61.4	0.848	0	32.63	7	635	7
FALSE	High	IsMasterProtein	ch02u_Q8WV92	MIT domain-containing protein 1 OS=Homo sapiens GN=MITD1 PE=1 SV=1	0	36.556	21.6867	5	31	5	1	249	29.3	8	High	High	High	Peak Found	High	High		0.834	0.802	0.888	109	111	105.9	91	89	94.1	2.728	0	23.09	5	324	5
FALSE	High	IsMasterProtein	ch05i_P80723	Brain acid soluble protein 1 OS=Homo sapiens GN=BASP1 PE=1 SV=2	0	36.502	51.1013	4	28	4	1	227	22.7	4.63	High	High	High	High	High	High		0.14	0.147	0.15	175.5	174.3	173.9	24.5	25.7	26.1	1.894	0	44.51	4	269	4
FALSE	High	IsMasterProtein	P23396	40S ribosomal protein S3 OS=Homo sapiens GN=RPS3 PE=1 SV=2	0	36.221	40.7407	9	38	9	1	243	26.7	9.66	High	High	High	Peak Found	Peak Found	Peak Found		0.078	0.01	0.097	185.5	198.5	182.3	14.5	1.5	17.7	1.976	0	33.11	9	339	9
FALSE	High	IsMasterProtein	ch04u_J3KMX3	Alpha-fetoprotein OS=Homo sapiens GN=AFP PE=1 SV=1	0	36.107	4.01929	3	49	3	1	622	70.4	5.55	High	High	High	Not Found	Not Found	Not Found		0.01	0.01	0.01	200	200	200				0.401	0	70.33	3	913	3
FALSE	High	IsMasterProtein	ch12u_Q7Z794	Keratin, type II cytoskeletal 1b OS=Homo sapiens GN=KRT77 PE=2 SV=3	0	36.015	7.43945	5	236	2	1	578	61.9	5.99	High	High	High	Not Found	Peak Found	Peak Found		0.01	0.01	0.01	200	199.3	199.3		0.7	0.7	0.808	0	205.54	5	1969	5
FALSE	High	IsMasterProtein	ch12i_Q12860	Contactin-1 OS=Homo sapiens GN=CNTN1 PE=1 SV=1	0	35.634	10.7073	8	29	8	1	1018	113.2	5.9	High	High	High	High	High	High		2.088	1.785	1.82	64.8	71.8	70.9	135.2	128.2	129.1	0.397	0	33.1	7	294	8
FALSE	High	IsMasterProtein	ch01i_Q9Y6R7	IgGFc-binding protein OS=Homo sapiens GN=FCGBP PE=1 SV=3	0	35.299	3.66327	9	42	9	1	5405	571.6	5.34	Not Found	Peak Found	Not Found	High	High	High		100	10.473	100		17.4		200	182.6	200	0.121	0	45.64	9	283	9
FALSE	High	IsMasterProtein	A0A024R8Q1	Glucosidase, alpha acid (Pompe disease, glycogen storage disease type II), isoform CRA_a OS=Homo sapiens GN=GAA PE=3 SV=1	0	35.184	8.5084	5	26	5	1	952	105.3	6	Not Found	Peak Found	Not Found	High	High	High		100	21.569	100		8.9		200	191.1	200	0.389	0	42.01	5	275	5
FALSE	High	IsMasterProtein	B0YJ32	Laminin alpha-3 chain variant 1 OS=Homo sapiens GN=LAMA3 PE=4 SV=1	0	34.789	2.78861	7	52	6	1	3335	366.7	7.24	Peak Found	Not Found	Not Found	High	High	High		1.383	100	100	83.9			116.1	200	200	0.109	0	78.04	7	417	7
FALSE	High	IsMasterProtein	ch02u_A0A087WUZ3	Spectrin beta chain, non-erythrocytic 1 OS=Homo sapiens GN=SPTBN1 PE=1 SV=1	0	34.724	5.19865	9	28	9	1	2366	274.7	5.57	High	High	High	Not Found	Not Found	High		0.01	0.01	0.195	200	200	167.4			32.6	0.153	0	28.65	9	183	8
FALSE	High	IsMasterProtein	Q9H1B5	Xylosyltransferase 2 OS=Homo sapiens GN=XYLT2 PE=1 SV=2	0	34.522	6.01156	4	34	4	1	865	96.7	8.22	High	High	High	High	High	High		1.523	1.807	1.633	79.3	71.3	75.9	120.7	128.7	124.1	0.512	0	45.8	4	338	4
FALSE	High	IsMasterProtein	ch10i_Q8NG11	Tetraspanin-14 OS=Homo sapiens GN=TSPAN14 PE=1 SV=1	0	34.28	18.1481	6	65	6	1	270	30.7	6.84	High	High	High	High	High	High		0.851	0.835	0.864	108.1	109	107.3	91.9	91	92.7	4.179	0	47.66	6	762	6
FALSE	High	IsMasterProtein	V9HWE0	Annexin OS=Homo sapiens GN=HEL-S-7 PE=2 SV=1	0	34.228	16.875	8	62	8	1	320	35.9	5.05	High	High	High	High	High	High		0.216	0.26	0.267	164.5	158.7	157.9	35.5	41.3	42.1	1.649	0	42.62	8	401	8
FALSE	High	IsMasterProtein	ch17i_O00232	26S proteasome non-ATPase regulatory subunit 12 OS=Homo sapiens GN=PSMD12 PE=1 SV=3	0	33.872	15.7895	6	33	6	1	456	52.9	7.65	High	High	High	Peak Found	Peak Found	Not Found		0.059	0.081	0.01	188.9	185	200	11.1	15		0.607	0	38.98	6	400	6
FALSE	High	IsMasterProtein	P12035	Keratin, type II cytoskeletal 3 OS=Homo sapiens GN=KRT3 PE=1 SV=3	0	33.284	10.3503	9	113	2	1	628	64.4	6.48	Not Found	High	High	Not Found	Not Found	Not Found			0.01			200					0.778	0	83.65	9	527	8
FALSE	High	IsMasterProtein	ch04i_Q16270	Insulin-like growth factor-binding protein 7 OS=Homo sapiens GN=IGFBP7 PE=1 SV=1	0	33.121	31.5603	6	36	6	1	282	29.1	7.9	Peak Found	Peak Found	Peak Found	High	High	High		34.147	17.605	20.762	5.7	10.7	9.2	194.3	189.3	190.8	1.254	0	47.68	6	493	6
FALSE	High	IsMasterProtein	A0A024RBS2	60S acidic ribosomal protein P0 OS=Homo sapiens GN=RPLP0 PE=3 SV=1	0	33.053	24.9211	4	37	4	1	317	34.3	5.97	High	High	High	Peak Found	High	High		0.136	0.109	0.106	176.1	180.3	180.8	23.9	19.7	19.2	1.069	0	35.22	4	493	4
FALSE	High	IsMasterProtein	ch03i_F8WCF6	Actin-related protein 2/3 complex subunit 4 OS=Homo sapiens GN=ARPC4-TTLL3 PE=3 SV=1	0	32.746	29.2818	6	54	6	1	181	21	8.76	High	High	High	High	High	High	Acetyl [N-Term]	0.209	0.2	0.205	165.4	166.6	166	34.6	33.4	34	5.105	0	42.31	5	488	6
FALSE	High	IsMasterProtein	ch05i_O75340	Programmed cell death protein 6 OS=Homo sapiens GN=PDCD6 PE=1 SV=1	0	32.434	25.1309	6	53	6	1	191	21.9	5.4	High	High	High	High	High	High		0.465	0.465	0.46	136.6	136.5	137	63.4	63.5	63	5.579	0	31.6	6	332	6
FALSE	High	IsMasterProtein	ch12i_B5MDF5	GTP-binding nuclear protein Ran OS=Homo sapiens GN=RAN PE=1 SV=1	0	32.429	26.6094	7	43	7	1	233	26.2	7.01	High	High	High	Peak Found	Peak Found	High	Acetyl [N-Term]	0.199	0.244	0.239	166.8	160.8	161.5	33.2	39.2	38.5	5.579	0	36.24	6	282	7
FALSE	High	IsMasterProtein	ch07u_P40926	Malate dehydrogenase, mitochondrial OS=Homo sapiens GN=MDH2 PE=1 SV=3	0	32.425	31.6568	6	24	6	1	338	35.5	8.68	High	High	High	Peak Found	Not Found	Not Found		0.065	0.01	0.01	187.9	200	200	12.1			0.738	0	26.34	6	386	6
FALSE	High	IsMasterProtein	Q8N7G1	Purine nucleoside phosphorylase OS=Homo sapiens PE=2 SV=1	0	32.382	26.6212	7	54	7	1	293	32.5	7.21	High	High	High	High	High	High		0.116	0.123	0.115	179.2	178	179.4	20.8	22	20.6	1.848	0	40.58	7	587	7
FALSE	High	IsMasterProtein	P63000-2	Isoform B of Ras-related C3 botulinum toxin substrate 1 OS=Homo sapiens GN=RAC1	0	32.23	28.91	6	70	6	1	211	23.5	8.63	High	High	High	High	High	High		0.341	0.348	0.327	149.2	148.4	150.7	50.8	51.6	49.3	9	0	36.48	6	480	6
FALSE	High	IsMasterProtein	ch03i_Q15008-4	Isoform 4 of 26S proteasome non-ATPase regulatory subunit 6 OS=Homo sapiens GN=PSMD6	0	32.205	12.6697	5	39	5	1	442	51.9	6.74	High	High	High	Peak Found	Peak Found	Peak Found		0.207	0.23	0.229	165.7	162.6	162.8	34.3	37.4	37.2	0.607	0	51.8	5	360	5
FALSE	High	IsMasterProtein	chXi_Q7Z6Z7	E3 ubiquitin-protein ligase HUWE1 OS=Homo sapiens GN=HUWE1 PE=1 SV=3	0	32.152	2.40055	6	16	6	1	4374	481.6	5.22	High	High	High	Peak Found	Not Found	Peak Found		0.319	0.01	0.273	151.6	200	157.1	48.4		42.9	0.064	0	13.95	6	258	6
FALSE	High	IsMasterProtein	ch12u_P78371	T-complex protein 1 subunit beta OS=Homo sapiens GN=CCT2 PE=1 SV=4	0	31.952	18.6916	6	30	6	1	535	57.5	6.46	High	High	High	Peak Found	Peak Found	Not Found	Acetyl [N-Term]	0.165	0.196	0.01	171.7	167.2	200	28.3	32.8		0.668	0	18	5	279	6
FALSE	High	IsMasterProtein	B5BU24	14-3-3 protein beta/alpha OS=Homo sapiens GN=YWHAB PE=2 SV=1	0	31.758	27.2358	7	90	4	1	246	28.1	4.83	High	High	High	Peak Found	High	High		0.219	0.226	0.185	164.1	163.1	168.8	35.9	36.9	31.2	3.437	0	58.24	6	460	7
FALSE	High	IsMasterProtein	D3DSQ1	N-acylsphingosine amidohydrolase (Acid ceramidase) 1, isoform CRA_c OS=Homo sapiens GN=ASAH1 PE=4 SV=1	0	30.819	14.1026	6	62	6	1	546	60.6	8.81	High	High	High	High	High	High		3.125	3.867	3.322	48.5	41.1	46.3	151.5	158.9	153.7	0.84	0	28.92	6	295	6
FALSE	High	IsMasterProtein	Q76M96-2	Isoform 2 of Coiled-coil domain-containing protein 80 OS=Homo sapiens GN=CCDC80	0	30.694	8.2206	5	22	5	1	961	109.4	9.72	Not Found	Not Found	Peak Found	High	High	High		100	100	6.278			27.5	200	200	172.5	0.215	0	26.69	5	289	5
FALSE	High	IsMasterProtein	A7LFP5	Beta-mannosidase OS=Homo sapiens GN=MANBA PE=2 SV=1	0	30.554	8.98749	7	22	7	1	879	100.8	5.68	Not Found	Not Found	Not Found	High	High	High		100	100	100				200	200	200	0.442	0	22.97	7	326	7
FALSE	High	IsMasterProtein	A0A1A7UP97	Galactosamine (N-acetyl)-6-sulfatase OS=Homo sapiens GN=GALNS PE=4 SV=1	0	30.535	13.7931	4	26	4	1	522	57.9	6.83	High	High	High	High	High	High		11.286	11.241	13.539	16.3	16.3	13.8	183.7	183.7	186.2	0.487	0	33.57	4	342	4
FALSE	High	IsMasterProtein	ch04i_P12429	Annexin A3 OS=Homo sapiens GN=ANXA3 PE=1 SV=3	0	30.368	24.1486	6	30	6	1	323	36.4	5.92	High	High	High	High	High	High		0.187	0.178	0.179	168.5	169.9	169.6	31.5	30.1	30.4	0.957	0	28.76	6	522	6
FALSE	High	IsMasterProtein	ch10u_P52895	Aldo-keto reductase family 1 member C2 OS=Homo sapiens GN=AKR1C2 PE=1 SV=3	0	30.165	21.6718	6	41	3	1	323	36.7	7.49	High	High	High	Peak Found	High	High		0.27	0.28	0.294	157.5	156.3	154.6	42.5	43.7	45.4	1.404	0	44.73	6	404	4
FALSE	High	IsMasterProtein	A0A024R5U5	ADAM metallopeptidase domain 10, isoform CRA_b OS=Homo sapiens GN=ADAM10 PE=4 SV=1	0	30.152	7.35294	5	42	5	1	748	84.1	7.77	High	High	High	High	High	High		0.57	0.749	0.56	127.4	114.4	128.2	72.6	85.6	71.8	0.492	0	39.77	5	432	5
FALSE	High	IsMasterProtein	ch12u_P55209	Nucleosome assembly protein 1-like 1 OS=Homo sapiens GN=NAP1L1 PE=1 SV=1	0	30.1	13.0435	5	34	3	1	391	45.3	4.46	High	High	High	Peak Found	High	Peak Found		0.176	0.178	0.145	170	169.8	174.7	30	30.2	25.3	1.512	2	39.42	5	488	5
FALSE	High	IsMasterProtein	ch10i_P18206	Vinculin OS=Homo sapiens GN=VCL PE=1 SV=4	0	29.917	7.58377	5	24	5	1	1134	123.7	5.66	High	High	High	Not Found	Peak Found	Peak Found		0.01	0.071	0.021	200	186.7	195.8		13.3	4.2	0.179	0	23.9	5	263	5
FALSE	High	IsMasterProtein	ch12i_P14625	Endoplasmin OS=Homo sapiens GN=HSP90B1 PE=1 SV=1	0	29.837	9.09091	5	32	4	1	803	92.4	4.84	High	High	High	Peak Found	Not Found	Not Found		0.082	0.01	0.01	184.8	200	200	15.2			0.372	0	42.2	5	399	5
FALSE	High	IsMasterProtein	Q59FB9	Toll interacting protein variant (Fragment) OS=Homo sapiens PE=2 SV=1	0	29.83	17.8977	5	42	5	1	352	38.9	8.46	High	High	High	High	High	High		0.683	2.542	0.744	118.8	56.5	114.7	81.2	143.5	85.3	1.31	0	32.79	5	331	5
FALSE	High	IsMasterProtein	A0A140VJT8	Testicular tissue protein Li 164 OS=Homo sapiens PE=2 SV=1	0	29.652	20.8243	7	30	7	1	461	49.9	4.82	High	High	High	Peak Found	Peak Found	Peak Found		0.269	0.23	0.211	157.6	162.6	165.1	42.4	37.4	34.9	0.711	0	33.06	7	461	7
FALSE	High	IsMasterProtein	A0A024R5J8	Leucine rich repeat containing 54, isoform CRA_a OS=Homo sapiens GN=LRRC54 PE=4 SV=1	0	29.256	14.7309	5	28	5	1	353	37.8	6.87	Peak Found	Peak Found	Peak Found	High	High	High		27.317	34.47	25.166	7.1	5.6	7.6	192.9	194.4	192.4	1.154	0	37.39	5	379	5
FALSE	High	IsMasterProtein	ch11i_Q9NS15	Latent-transforming growth factor beta-binding protein 3 OS=Homo sapiens GN=LTBP3 PE=1 SV=4	0	29.028	5.44896	4	27	4	1	1303	139.3	6.07	Peak Found	Peak Found	Peak Found	High	High	High		14.975	28.707	2.906	12.5	6.7	51.2	187.5	193.3	148.8	0.184	0	15.35	4	401	4
FALSE	High	IsMasterProtein	Q9Y315	Deoxyribose-phosphate aldolase OS=Homo sapiens GN=DERA PE=1 SV=2	0	28.846	26.4151	6	31	6	1	318	35.2	8.94	High	High	High	Peak Found	High	Not Found		0.096	0.102		182.6	181.4		17.4	18.6		1.081	0	29.05	6	390	6
FALSE	High	IsMasterProtein	A5YM53	ITGAV protein OS=Homo sapiens GN=ITGAV PE=2 SV=1	0	28.002	5.34351	4	22	4	1	1048	116	5.74	High	High	High	High	Not Found	High		0.128		0.112	177.3		179.9	22.7		20.1	0.222	0	23.86	4	359	4
FALSE	High	IsMasterProtein	ch11i_E9PR17	CD59 glycoprotein OS=Homo sapiens GN=CD59 PE=1 SV=1	0	27.525	19.2308	4	43	4	1	130	14.5	7.77	High	High	High	Peak Found	High	High		0.248	0.257	0.254	160.2	159.1	159.5	39.8	40.9	40.5	20.544	0	23.61	4	179	4
FALSE	High	IsMasterProtein	A0A0A1HAW1	H.sapiens ras-related Hrab2 protein OS=Homo sapiens PE=2 SV=1	0	27.311	24.0566	4	23	4	1	212	23.6	6.54	High	High	High	Peak Found	High	High	Acetyl [N-Term]	0.143	0.087	0.234	175	184	162	25	16	38	1.929	0	13.09	3	184	4
FALSE	High	IsMasterProtein	P61812-2	Isoform B of Transforming growth factor beta-2 OS=Homo sapiens GN=TGFB2	0	27.09	9.72851	4	38	4	1	442	50.5	8.41	High	High	High	High	High	High		2.66	2.562	2.727	54.6	56.1	53.7	145.4	143.9	146.3	0.957	0	33.18	4	306	4
FALSE	High	IsMasterProtein	ch16i_Q92896-2	Isoform 2 of Golgi apparatus protein 1 OS=Homo sapiens GN=GLG1	0	26.562	3.15877	3	18	3	1	1203	137.1	6.9	High	High	High	High	High	High		1.181	1.617	1.302	91.7	76.4	86.9	108.3	123.6	113.1	0.134	0	23.07	3	344	3
FALSE	High	IsMasterProtein	B3KME2	cDNA FLJ10772 fis, clone NT2RP4000243, highly similar to Cartilage-associated protein OS=Homo sapiens PE=2 SV=1	0	26.356	19.202	6	30	6	1	401	46.5	5.85	Peak Found	Peak Found	High	High	High	High		13.443	5.546	3.343	13.8	30.6	46.1	186.2	169.4	153.9	0.978	0	24.97	6	223	6
FALSE	High	IsMasterProtein	ch08i_P00390	Glutathione reductase, mitochondrial OS=Homo sapiens GN=GSR PE=1 SV=2	0	26.181	18.3908	6	26	6	1	522	56.2	8.5	High	High	High	Peak Found	Peak Found	Peak Found		0.099	0.125	0.134	182	177.7	176.4	18	22.3	23.6	0.61	0	36.45	6	235	6
FALSE	High	IsMasterProtein	ch06i_A0A0G2JPR0	Complement C4-A OS=Homo sapiens GN=C4A PE=1 SV=1	0	25.455	3.38303	6	65	6	1	1744	192.8	7.03	High	High	High	Not Found	Not Found	Not Found		0.01	0.01	0.01	200	200	200				0.212	0	48.95	6	435	6
FALSE	High	IsMasterProtein	ch09i_Q6ZRP7	Sulfhydryl oxidase 2 OS=Homo sapiens GN=QSOX2 PE=1 SV=3	0	25.423	8.30946	4	20	4	1	698	77.5	7.72	High	High	High	Peak Found	Peak Found	Peak Found		0.227	0.226	0.236	163	163.1	161.8	37	36.9	38.2	0.222	0	26.57	4	384	4
FALSE	High	IsMasterProtein	ch02i_P02461	Collagen alpha-1(III) chain OS=Homo sapiens GN=COL3A1 PE=1 SV=4	0	25.202	1.90996	2	36	2	1	1466	138.5	6.61	High	High	High	Not Found	Not Found	Not Found		0.01	0.01	0.01	200	200	200				0.119	0	33.29	2	636	2
FALSE	High	IsMasterProtein	P08729	Keratin, type II cytoskeletal 7 OS=Homo sapiens GN=KRT7 PE=1 SV=5	0	25.198	8.10235	5	96	2	1	469	51.4	5.48	Not Found	Not Found	High	Not Found	Not Found	Not Found											0.484	0	76.56	5	432	5
FALSE	High	IsMasterProtein	ch17u_J3QQX2	Rho GDP-dissociation inhibitor 1 OS=Homo sapiens GN=ARHGDIA PE=1 SV=1	0	25.101	13.617	3	18	3	1	235	25.8	7.44	High	High	High	High	High	High		0.147	0.173	0.15	174.4	170.5	173.9	25.6	29.5	26.1	0.778	0	20.81	3	286	3
FALSE	High	IsMasterProtein	P05787-2	Isoform 2 of Keratin, type II cytoskeletal 8 OS=Homo sapiens GN=KRT8	0	24.846	5.08806	4	102	1	1	511	56.6	5.43	High	High	High	Peak Found	High	High		0.146	0.133	0.115	174.6	176.5	179.4	25.4	23.5	20.6	0.484	0	84.56	4	469	4
FALSE	High	IsMasterProtein	ch04u_Q9Y2E5	Epididymis-specific alpha-mannosidase OS=Homo sapiens GN=MAN2B2 PE=1 SV=4	0	24.709	8.02775	6	11	6	1	1009	113.9	7.24	Not Found	Not Found	Not Found	High	High	High		100	100	100				200	200	200	0.359	0	9.38	6	107	5
FALSE	High	IsMasterProtein	ch15i_P39687	Acidic leucine-rich nuclear phosphoprotein 32 family member A OS=Homo sapiens GN=ANP32A PE=1 SV=1	0	24.361	14.4578	4	28	3	1	249	28.6	4.09	High	High	High	Not Found	Peak Found	Not Found			0.071	0.01		186.7	200		13.3		2.511	0	35.12	4	315	4
FALSE	High	IsMasterProtein	F6IR49	MHC class I antigen (Fragment) OS=Homo sapiens GN=HLA-A PE=3 SV=1	0	24.33	10.3858	2	6	1	1	337	38.1	6.46	Not Found	Not Found	Not Found	Not Found	Not Found	Not Found											0.245	0	8.33	1	64	2
FALSE	High	IsMasterProtein	ch19i_O43633	Charged multivesicular body protein 2a OS=Homo sapiens GN=CHMP2A PE=1 SV=1	0	24.172	15.3153	3	17	3	1	222	25.1	5.97	High	High	High	Peak Found	High	Peak Found	Acetyl [N-Term]	0.718	0.889	0.838	116.4	105.9	108.8	83.6	94.1	91.2	2.162	0	17.72	2	284	3
FALSE	High	IsMasterProtein	V9HWE9	Epididymis secretory protein Li 22 OS=Homo sapiens GN=HEL-S-22 PE=2 SV=1	0	24.014	27.1429	4	22	4	1	210	23.3	5.64	High	High	High	Peak Found	High	High		0.16	0.181	0.171	172.4	169.4	170.9	27.6	30.6	29.1	1.61	0	8.03	3	274	4
FALSE	High	IsMasterProtein	P26641	Elongation factor 1-gamma OS=Homo sapiens GN=EEF1G PE=1 SV=3	0	24.006	11.4416	4	28	4	1	437	50.1	6.67	High	High	High	Peak Found	Peak Found	Peak Found	Acetyl [N-Term]	0.016	0.015	0.015	196.9	197	197.1	3.1	3	2.9	0.509	0	29.23	3	387	4
FALSE	High	IsMasterProtein	ch07i_O60568	Procollagen-lysine,2-oxoglutarate 5-dioxygenase 3 OS=Homo sapiens GN=PLOD3 PE=1 SV=1	0	24.001	7.31707	4	16	4	1	738	84.7	6.05	High	High	High	Peak Found	Peak Found	Peak Found		0.129	0.283	0.138	177.1	155.9	175.7	22.9	44.1	24.3	0.216	0	15.35	4	113	4
FALSE	High	IsMasterProtein	P23528	Cofilin-1 OS=Homo sapiens GN=CFL1 PE=1 SV=3	0	23.92	21.0843	4	27	4	1	166	18.5	8.09	High	High	High	Peak Found	Peak Found	Peak Found	Acetyl [N-Term]	0.188	0.187	0.189	168.3	168.5	168.2	31.7	31.5	31.8	2.162	0	9.46	3	417	4
FALSE	High	IsMasterProtein	ch02i_O75581	Low-density lipoprotein receptor-related protein 6 OS=Homo sapiens GN=LRP6 PE=1 SV=2	0	23.875	2.78983	3	18	3	1	1613	180.3	5.31	High	High	Peak Found	High	High	High		1.88	1.911	1.215	69.4	68.7	90.3	130.6	131.3	109.7	0.102	0	19.07	3	136	3
FALSE	High	IsMasterProtein	A8K7T4	cDNA FLJ75774, highly similar to Homo sapiens lectin, mannose-binding 2 (LMAN2), mRNA OS=Homo sapiens PE=2 SV=1	0	23.856	12.3596	4	24	4	1	356	40.2	6.95	High	High	High	High	High	High		0.831	0.793	1.033	109.2	111.5	98.4	90.8	88.5	101.6	0.931	0	17.34	4	291	4
FALSE	High	IsMasterProtein	A8K6Q8	cDNA FLJ75881, highly similar to Homo sapiens transferrin receptor (p90, CD71) (TFRC), mRNA OS=Homo sapiens PE=2 SV=1	0	23.745	10	6	35	6	1	760	84.8	6.61	High	High	High	High	High	High		0.295	0.244	0.248	154.4	160.8	160.2	45.6	39.2	39.8	0.435	0	32.09	6	246	6
FALSE	High	IsMasterProtein	B2ZZ86	Collagen type V alpha 1 OS=Homo sapiens GN=COL5A1 PE=2 SV=1	0	23.706	1.90424	2	18	2	1	1838	183.5	5.06	Peak Found	Not Found	Peak Found	High	High	High		2.571	100	5.671	56		30	144	200	170	0.071	0	28.65	2	154	2
FALSE	High	IsMasterProtein	ch15i_O43570	Carbonic anhydrase 12 OS=Homo sapiens GN=CA12 PE=1 SV=1	0	23.61	14.6893	3	19	3	1	354	39.4	7.23	High	High	High	High	High	High		1.025	1.283	1.004	98.7	87.6	99.8	101.3	112.4	100.2	1.371	0	10.81	3	227	3
FALSE	High	IsMasterProtein	ch05i_P63244	Receptor of activated protein C kinase 1 OS=Homo sapiens GN=RACK1 PE=1 SV=3	0	23.368	20.8202	5	24	5	1	317	35.1	7.69	High	High	High	Not Found	Peak Found	Peak Found		0.01	0.134	0.335	200	176.3	149.9		23.7	50.1	0.874	0	16.93	5	299	5
FALSE	High	IsMasterProtein	P51148-2	Isoform 2 of Ras-related protein Rab-5C OS=Homo sapiens GN=RAB5C	0	23.298	14.8594	3	32	3	1	249	27	8.66	High	High	High	High	High	High		0.327	0.322	0.315	150.7	151.2	152.1	49.3	48.8	47.9	1.054	0	34.8	3	467	3
FALSE	High	IsMasterProtein	A0A140VK70	Testis secretory sperm-binding protein Li 197a OS=Homo sapiens PE=2 SV=1	0	23.26	16.6282	6	22	6	1	433	48.6	5.95	High	High	High	Not Found	Peak Found	Peak Found		0.01	0.014	0.143	200	197.2	174.9		2.8	25.1	0.562	0	25.76	6	177	6
FALSE	High	IsMasterProtein	ch06i_O00299	Chloride intracellular channel protein 1 OS=Homo sapiens GN=CLIC1 PE=1 SV=4	0	23.259	21.1618	4	30	4	1	241	26.9	5.17	High	High	High	High	High	High	Acetyl [N-Term]	0.187	0.204	0.189	168.4	166.1	168.3	31.6	33.9	31.7	1.254	0	19.57	3	307	4
FALSE	High	IsMasterProtein	ch02i_P05997	Collagen alpha-2(V) chain OS=Homo sapiens GN=COL5A2 PE=1 SV=3	0	23.066	1.66778	3	30	3	1	1499	144.8	6.46	Peak Found	Peak Found	Peak Found	High	High	High		5.909	14.448	14.75	28.9	12.9	12.7	171.1	187.1	187.3	0.136	0	29.25	3	225	3
FALSE	High	IsMasterProtein	ch12i_P05091	Aldehyde dehydrogenase, mitochondrial OS=Homo sapiens GN=ALDH2 PE=1 SV=2	0	23.044	6.5764	4	84	1	1	517	56.3	7.05	High	High	Not Found	Peak Found	Peak Found	Not Found		0.256	0.306		159.3	153.1		40.7	46.9		0.931	0	72.7	4	240	4
FALSE	High	IsMasterProtein	ch05i_Q01581	Hydroxymethylglutaryl-CoA synthase, cytoplasmic OS=Homo sapiens GN=HMGCS1 PE=1 SV=2	0	22.832	13.4615	3	12	3	1	520	57.3	5.41	Not Found	Not Found	High	Not Found	Not Found	High				1.072			96.5			103.5	0.407	0	18.33	3	195	3
FALSE	High	IsMasterProtein	ch01u_P48507	Glutamate--cysteine ligase regulatory subunit OS=Homo sapiens GN=GCLM PE=1 SV=1	0	22.702	21.1679	4	24	4	1	274	30.7	6.02	High	High	High	Peak Found	Peak Found	Peak Found		0.291	0.318	0.269	154.9	151.7	157.6	45.1	48.3	42.4	1.424	0	17.99	4	230	4
FALSE	High	IsMasterProtein	A8K7F6	cDNA FLJ78244, highly similar to Homo sapiens eukaryotic translation initiation factor 4A, isoform 1 (EIF4A1), mRNA OS=Homo sapiens PE=2 SV=1	0	22.673	12.8079	4	20	4	1	406	46.1	5.48	High	High	High	Peak Found	Peak Found	Peak Found		0.229	0.237	0.237	162.8	161.7	161.6	37.2	38.3	38.4	0.468	0	28.13	4	403	4
FALSE	High	IsMasterProtein	ch19i_P10301	Ras-related protein R-Ras OS=Homo sapiens GN=RRAS PE=1 SV=1	0	22.598	26.6055	4	26	4	1	218	23.5	6.93	High	High	High	High	High	High		0.271	0.266	0.27	157.4	158	157.5	42.6	42	42.5	1.154	0	31.31	4	279	4
FALSE	High	IsMasterProtein	A0A0K2BMD8	Mutant hemoglobin alpha 2 globin chain OS=Homo sapiens GN=HBA2 PE=3 SV=1	0	22.548	34.507	5	68	5	1	142	15.2	8.68	High	High	High	Not Found	Not Found	Not Found		0.01	0.01	0.01	200	200	200				4.623	0	84.79	5	723	5
FALSE	High	IsMasterProtein	ch12u_P61224	Ras-related protein Rap-1b OS=Homo sapiens GN=RAP1B PE=1 SV=1	0	22.517	19.0217	4	50	4	1	184	20.8	5.78	High	High	High	High	High	High		0.142	0.069	0.168	175.1	187.1	171.2	24.9	12.9	28.8	1.61	0	37.42	4	441	4
FALSE	High	IsMasterProtein	A8K3S1	Glucosamine-6-phosphate isomerase OS=Homo sapiens PE=2 SV=1	0	22.281	16.955	4	40	2	1	289	32.7	6.92	High	High	High	High	High	High		0.258	0.252	0.297	159	159.7	154.2	41	40.3	45.8	1.154	2	27.82	4	400	4
FALSE	High	IsMasterProtein	ch02u_P61026	Ras-related protein Rab-10 OS=Homo sapiens GN=RAB10 PE=1 SV=1	0	22.257	26.5	4	42	2	1	200	22.5	8.38	High	High	High	Peak Found	Peak Found	Peak Found		0.139	0.107	0.144	175.5	180.6	174.8	24.5	19.4	25.2	1.254	2	31.87	4	323	4
FALSE	High	IsMasterProtein	ch14u_A0A087X2I1	26S protease regulatory subunit 10B OS=Homo sapiens GN=PSMC6 PE=1 SV=1	0	22.181	13.8958	4	20	4	1	403	45.8	7.78	High	High	High	Not Found	Peak Found	Peak Found		0.01	0.05	0.106	200	190.6	180.8		9.4	19.2	0.374	0	26.83	4	285	4
FALSE	High	IsMasterProtein	ch20i_P60981	Destrin OS=Homo sapiens GN=DSTN PE=1 SV=3	0	22.117	13.9394	2	17	2	1	165	18.5	7.85	High	High	High	High	High	High	Acetyl [N-Term]	0.282	0.285	0.29	156	155.7	155.1	44	44.3	44.9	1.031	0	10.09	1	338	2
FALSE	High	IsMasterProtein	D3DQH8	Secreted protein, acidic, cysteine-rich (Osteonectin), isoform CRA_a OS=Homo sapiens GN=SPARC PE=4 SV=1	0	22.113	15.5556	5	28	5	1	315	36	4.88	Peak Found	Peak Found	Peak Found	High	High	High		4.726	5.522	6.654	34.9	30.7	26.1	165.1	169.3	173.9	0.968	0	33.44	5	307	5
FALSE	High	IsMasterProtein	P28838	Cytosol aminopeptidase OS=Homo sapiens GN=LAP3 PE=1 SV=3	0	22.092	18.1118	7	22	7	1	519	56.1	7.93	High	High	High	Peak Found	Peak Found	High		0.557	0.434	0.46	128.4	139.4	137	71.6	60.6	63	0.565	0	18.58	7	56	7
FALSE	High	IsMasterProtein	A8K669	cDNA FLJ78452, highly similar to Homo sapiens legumain (LGMN), transcript variant 2, mRNA OS=Homo sapiens PE=2 SV=1	0	22.076	11.7783	3	20	3	1	433	49.4	6.55	Peak Found	Peak Found	Not Found	High	High	High		5.864	3.959	100	29.1	40.3		170.9	159.7	200	0.334	0	27.94	3	372	3
FALSE	High	IsMasterProtein	P08572	Collagen alpha-2(IV) chain OS=Homo sapiens GN=COL4A2 PE=1 SV=4	0	21.967	2.80374	4	35	4	1	1712	167.4	8.66	High	High	High	High	High	High		4.247	4.215	4.51	38.1	38.3	36.3	161.9	161.7	163.7	0.15	0	35.52	4	327	4
FALSE	High	IsMasterProtein	ch17i_P07737	Profilin-1 OS=Homo sapiens GN=PFN1 PE=1 SV=2	0	21.864	22.1429	3	21	3	1	140	15	8.27	High	High	High	Peak Found	Peak Found	High		0.202	0.212	0.201	166.4	165.1	166.6	33.6	34.9	33.4	2.594	0	11.12	3	304	3
FALSE	High	IsMasterProtein	B7Z6Q5	Beta-galactosidase OS=Homo sapiens PE=2 SV=1	0	21.773	7.03448	4	30	4	1	725	81.8	7.94	High	Not Found	Peak Found	High	High	High		21.955	100	100	8.7		0.5	191.3	200	199.5	0.417	0	34.98	4	437	4
FALSE	High	IsMasterProtein	B4DHQ3	Phosphoserine aminotransferase OS=Homo sapiens PE=2 SV=1	0	21.751	11.0843	5	28	5	1	415	45.3	9.03	High	High	High	Peak Found	Peak Found	Peak Found		0.126	0.125	0.12	177.6	177.7	178.6	22.4	22.3	21.4	0.54	0	36.14	5	366	5
FALSE	High	IsMasterProtein	ch16u_P08253	72 kDa type IV collagenase OS=Homo sapiens GN=MMP2 PE=1 SV=2	0	21.751	6.81818	3	16	3	1	660	73.8	5.47	Not Found	Not Found	Not Found	High	High	High		100	100	100				200	200	200	0.189	0	21.65	3	501	3
FALSE	High	IsMasterProtein	A0A158RFU6	RAB7, member RAS oncogene family, isoform CRA_a OS=Homo sapiens GN=RAB7A PE=2 SV=1	0	21.658	21.256	4	26	4	1	207	23.5	6.7	High	High	High	High	High	Peak Found		0.204	0.211	0.212	166.1	165.2	165	33.9	34.8	35	1.254	0	27.02	4	237	4
FALSE	High	IsMasterProtein	B3KQR3	cDNA PSEC0065 fis, clone NT2RP2000997, highly similar to Protein CREG1 OS=Homo sapiens PE=2 SV=1	0	21.623	15.4545	3	56	3	1	220	24	7.59	High	High	High	High	High	High		4.483	3.668	5.077	36.5	42.8	32.9	163.5	157.2	167.1	1.848	0	52.86	3	270	3
FALSE	High	IsMasterProtein	A8K781	cDNA FLJ75299, highly similar to Xenopus laevis proteasome (prosome, macropain) 26S subunit, ATPase 3, mRNA OS=Homo sapiens PE=2 SV=1	0	21.53	15.8392	4	16	4	1	423	47.3	5.22	High	High	High	Peak Found	Not Found	Not Found	Acetyl [N-Term]	0.146	0.01	0.01	174.5	200	200	25.5			0.425	0	18.94	3	260	4
FALSE	High	IsMasterProtein	B2RAN2	cDNA, FLJ95014, highly similar to Homo sapiens vanin 1 (VNN1), mRNA OS=Homo sapiens PE=2 SV=1	0	21.406	3.7037	1	8	1	1	513	57	5.57	High	High	High	Not Found	Not Found	Not Found		0.01	0.01	0.01	200	200	200				0.186	0	17.23	1	316	1
FALSE	High	IsMasterProtein	ch22i_P35579	Myosin-9 OS=Homo sapiens GN=MYH9 PE=1 SV=4	0	21.37	3.57143	5	18	5	1	1960	226.4	5.6	High	High	High	Not Found	Not Found	Not Found		0.01		0.01	200		200				0.093	0	14.41	5	130	5
FALSE	High	IsMasterProtein	Q9UNM6-2	Isoform 2 of 26S proteasome non-ATPase regulatory subunit 13 OS=Homo sapiens GN=PSMD13	0	21.356	17.7249	6	28	6	1	378	42.9	6.54	High	High	High	Peak Found	Peak Found	Peak Found		0.138	0.141	0.124	175.7	175.3	177.9	24.3	24.7	22.1	0.668	0	24.52	6	227	6
FALSE	High	IsMasterProtein	Q92930	Ras-related protein Rab-8B OS=Homo sapiens GN=RAB8B PE=1 SV=2	0	21.236	17.3913	3	36	1	1	207	23.6	9.07	High	High	Not Found	Peak Found	Peak Found	Not Found		0.358	0.416		147.3	141.2		52.7	58.8		1.054	0	30.72	3	355	3
FALSE	High	IsMasterProtein	chXi_P22314	Ubiquitin-like modifier-activating enzyme 1 OS=Homo sapiens GN=UBA1 PE=1 SV=3	0	21.108	5.7656	4	29	4	1	1058	117.8	5.76	High	High	High	Peak Found	Peak Found	Peak Found		0.294	0.329	0.102	154.6	150.5	181.5	45.4	49.5	18.5	0.166	0	36.17	4	399	4
FALSE	High	IsMasterProtein	P31947	14-3-3 protein sigma OS=Homo sapiens GN=SFN PE=1 SV=1	0	20.922	12.9032	3	62	1	1	248	27.8	4.74	High	High	High	Peak Found	Peak Found	Peak Found		0.269	0.262	0.264	157.6	158.5	158.3	42.4	41.5	41.7	1.154	0	45.67	3	332	3
FALSE	High	IsMasterProtein	B4DNC0	cDNA FLJ61141, highly similar to Ras-related protein Rab-34 OS=Homo sapiens PE=2 SV=1	0	20.819	10.5839	2	16	2	1	274	30.6	8.37	High	High	High	High	High	High		0.198	0.01	0.284	167	200	155.7	33		44.3	0.413	0	18.08	2	330	2
FALSE	High	IsMasterProtein	Q59ES3	Amino acid transporter (Fragment) OS=Homo sapiens PE=2 SV=1	0	20.734	10.219	4	28	1	1	548	57.4	5.38	High	High	High	Peak Found	Peak Found	Not Found		1.137	0.285	0.697	93.6	155.7	117.9	106.4	44.3	82.1	0.52	3	29.07	4	303	4
FALSE	High	IsMasterProtein	ch11u_Q9GZP0	Platelet-derived growth factor D OS=Homo sapiens GN=PDGFD PE=1 SV=1	0	20.724	14.5946	5	22	5	1	370	42.8	7.97	High	High	High	High	High	High		15.282	15.413	14.968	12.3	12.2	12.5	187.7	187.8	187.5	0.823	0	24.39	5	298	5
FALSE	High	IsMasterProtein	ch01i_P30520	Adenylosuccinate synthetase isozyme 2 OS=Homo sapiens GN=ADSS PE=1 SV=3	0	20.649	10.5263	4	12	4	1	456	50.1	6.55	High	High	High	Peak Found	Not Found	Not Found		0.227		0.01	163		200	37			0.389	0	13.73	4	335	4
FALSE	High	IsMasterProtein	Q15758	Neutral amino acid transporter B(0) OS=Homo sapiens GN=SLC1A5 PE=1 SV=2	0	20.638	10.3512	4	26	1	1	541	56.6	5.48	High	High	High	Peak Found	Peak Found	Peak Found		0.181	0.28	0.297	169.4	156.2	154.2	30.6	43.8	45.8	0.52	0	28.19	4	320	4
FALSE	High	IsMasterProtein	ch11i_Q24JP5-2	Isoform 2 of Transmembrane protein 132A OS=Homo sapiens GN=TMEM132A	0	20.59	8.49609	5	13	5	1	1024	110.1	5.62	High	High	Peak Found	High	High	High		2.214	2.103	6.204	62.2	64.5	27.8	137.8	135.5	172.2	0.284	0	17.72	5	98	4
FALSE	High	IsMasterProtein	A8K168	Malic enzyme OS=Homo sapiens PE=2 SV=1	0	20.443	7.51748	2	8	2	1	572	64.1	6.13	High	High	High	Peak Found	Peak Found	Peak Found		0.261	0.314	0.306	158.6	152.2	153.2	41.4	47.8	46.8	0.155	0	15.16	2	238	2
FALSE	High	IsMasterProtein	ch16i_P53990-5	Isoform 5 of IST1 homolog OS=Homo sapiens GN=IST1	0	20.326	7.91557	4	26	4	1	379	41.5	5.57	High	High	High	High	High	High		0.834	0.651	0.893	109.1	121.1	105.7	90.9	78.9	94.3	0.968	0	27.85	4	245	4
FALSE	High	IsMasterProtein	A8K3C3	T-complex protein 1 subunit delta OS=Homo sapiens PE=2 SV=1	0	20.024	7.79221	3	19	3	1	539	57.9	7.83	High	High	High	Not Found	Not Found	Peak Found		0.01		0.046	200		191.2			8.8	0.199	0	24.1	3	244	2
FALSE	High	IsMasterProtein	B4DS05	cDNA FLJ59403, highly similar to Nucleosome assembly protein 1-like 4 OS=Homo sapiens PE=2 SV=1	0	19.92	6.73575	3	18	1	1	386	44.1	4.7	Not Found	High	High	Not Found	Not Found	Not Found			0.01	0.01		200	200				0.551	0	16.61	3	206	3
FALSE	High	IsMasterProtein	B2RD27	cDNA, FLJ96428, highly similar to Homo sapiens proteasome (prosome, macropain) 26S subunit, non-ATPase, 7 (Mov34 homolog) (PSMD7), mRNA OS=Homo sapiens PE=2 SV=1	0	19.893	16.6667	4	22	4	1	324	37	6.77	High	High	High	Peak Found	Peak Found	Peak Found		0.129	0.127	0.111	177.1	177.5	180	22.9	22.5	20	0.848	0	24.66	4	164	4
FALSE	High	IsMasterProtein	A8K0C2	cDNA FLJ75950 OS=Homo sapiens PE=2 SV=1	0	19.888	12.0879	2	15	2	1	273	28.8	8.91	High	High	High	High	High	High		1.291	1.07	1.32	87.3	96.6	86.2	112.7	103.4	113.8	0.931	0	11.53	2	336	2
FALSE	High	IsMasterProtein	ch06i_Q86SQ4-3	Isoform 3 of G-protein coupled receptor 126 OS=Homo sapiens GN=GPR126	0	19.804	4.72	4	18	4	1	1250	139.8	7.75	Peak Found	Peak Found	Peak Found	High	High	High		3.464	11.433	8.77	44.8	16.1	20.5	155.2	183.9	179.5	0.172	0	21.34	4	327	4
FALSE	High	IsMasterProtein	ch02i_P31153	S-adenosylmethionine synthase isoform type-2 OS=Homo sapiens GN=MAT2A PE=1 SV=1	0	19.534	10.3797	5	15	5	1	395	43.6	6.48	High	High	High	Peak Found	Peak Found	Peak Found		0.17	0.182	0.163	171	169.2	171.9	29	30.8	28.1	0.65	0	16.01	4	253	5
FALSE	High	IsMasterProtein	ch01u_B1AKJ5	Nardilysin OS=Homo sapiens GN=NRDC PE=1 SV=1	0	19.468	4.51189	5	26	5	1	1219	139.3	5	High	High	High	High	High	High		0.253		0.187	159.6		168.4	40.4		31.6	0.28	0	23.86	5	180	5
FALSE	High	IsMasterProtein	O95373	Importin-7 OS=Homo sapiens GN=IPO7 PE=1 SV=1	0	19.432	3.08285	2	14	2	1	1038	119.4	4.82	High	High	High	Peak Found	Not Found	Not Found		0.135	0.01	0.01	176.2	200	200	23.8			0.151	0	15.02	2	142	2
FALSE	High	IsMasterProtein	Q9ULV4-3	Isoform 3 of Coronin-1C OS=Homo sapiens GN=CORO1C	0	19.387	7.77989	3	18	3	1	527	58.9	7.75	High	High	High	Peak Found	Peak Found	Peak Found		0.281	0.182	0.182	156.1	169.2	169.2	43.9	30.8	30.8	0.359	0	21.01	3	255	3
FALSE	High	IsMasterProtein	ch01i_P05023-4	Isoform 4 of Sodium/potassium-transporting ATPase subunit alpha-1 OS=Homo sapiens GN=ATP1A1	0	19.38	5.76735	4	10	4	1	1023	112.9	5.49	High	High	High	Not Found	Not Found	Not Found		0.01		0.01	200		200				0.194	0	11.63	4	157	4
FALSE	High	IsMasterProtein	B5BUB5	Autoantigen La (Fragment) OS=Homo sapiens GN=SSB PE=2 SV=1	0	19.154	9.06863	4	16	4	1	408	46.8	7.12	High	High	High	Not Found	Not Found	Peak Found		0.01	0.01	0.096	200	200	182.5			17.5	0.374	0	17.67	4	236	4
FALSE	High	IsMasterProtein	ch01i_P29317	Ephrin type-A receptor 2 OS=Homo sapiens GN=EPHA2 PE=1 SV=2	0	18.939	5.02049	4	14	4	1	976	108.2	6.23	High	High	High	Not Found	Peak Found	Not Found		0.01	0.437	0.01	200	139.2	200		60.8		0.172	0	13.6	4	162	4
FALSE	High	IsMasterProtein	ch05i_P17301	Integrin alpha-2 OS=Homo sapiens GN=ITGA2 PE=1 SV=1	0	18.93	4.40305	4	16	4	1	1181	129.2	5.31	High	High	High	Not Found	Not Found	Not Found		0.01	0.01	0.01	200	200	200				0.182	0	20.2	4	286	4
FALSE	High	IsMasterProtein	P10155	60 kDa SS-A/Ro ribonucleoprotein OS=Homo sapiens GN=TROVE2 PE=1 SV=2	0	18.823	6.50558	3	22	3	1	538	60.6	8.03	High	High	High	Peak Found	High	High		0.251	0.269	0.292	159.8	157.6	154.8	40.2	42.4	45.2	0.403	0	25.09	3	273	3
FALSE	High	IsMasterProtein	ch02i_P61604	10 kDa heat shock protein, mitochondrial OS=Homo sapiens GN=HSPE1 PE=1 SV=2	0	18.696	46.0784	5	30	5	1	102	10.9	8.92	High	High	High	Peak Found	Peak Found	Peak Found		0.081	0.088	0.2	185	183.9	166.7	15	16.1	33.3	2.162	0	21.77	5	300	5
FALSE	High	IsMasterProtein	ch12u_Q9UBW8	COP9 signalosome complex subunit 7a OS=Homo sapiens GN=COPS7A PE=1 SV=1	0	18.675	20.7273	3	14	3	1	275	30.3	8.22	High	High	High	High	High	Peak Found		0.209	0.162	0.175	165.5	172.1	170.2	34.5	27.9	29.8	0.719	0	11.09	3	234	3
FALSE	High	IsMasterProtein	Q59EG8	Proteasome 26S non-ATPase subunit 2 variant (Fragment) OS=Homo sapiens PE=2 SV=1	0	18.584	5.80504	3	20	3	1	913	100.5	5.15	High	High	High	Not Found	Peak Found	Peak Found		0.01	0.033	0.053	200	193.7	190		6.3	10	0.126	0	27.75	3	274	3
FALSE	High	IsMasterProtein	P23284	Peptidyl-prolyl cis-trans isomerase B OS=Homo sapiens GN=PPIB PE=1 SV=2	0	18.546	25	5	29	5	1	216	23.7	9.41	High	High	High	High	High	High		0.231	0.237	1.056	162.5	161.7	97.3	37.5	38.3	102.7	1.371	0	15.87	5	265	5
FALSE	High	IsMasterProtein	ch16u_Q01650	Large neutral amino acids transporter small subunit 1 OS=Homo sapiens GN=SLC7A5 PE=1 SV=2	0	18.473	3.5503	1	28	1	1	507	55	7.72	High	High	High	High	High	High		0.224	0.22	0.218	163.4	163.9	164.2	36.6	36.1	35.8	0.259	0	38.39	1	622	1
FALSE	High	IsMasterProtein	ch20u_Q9UNN8	Endothelial protein C receptor OS=Homo sapiens GN=PROCR PE=1 SV=1	0	18.429	7.14286	1	12	1	1	238	26.7	7.18	High	High	High	High	High	High		1.43	1.373	1.467	82.3	84.3	81.1	117.7	115.7	118.9	0.425	0	21.85	1	275	1
FALSE	High	IsMasterProtein	Q16531	DNA damage-binding protein 1 OS=Homo sapiens GN=DDB1 PE=1 SV=1	0	18.185	4.21053	4	22	4	1	1140	126.9	5.26	High	High	High	Peak Found	Peak Found	Peak Found		0.392	0.265	0.293	143.7	158.1	154.7	56.3	41.9	45.3	0.163	0	24.57	4	168	4
FALSE	High	IsMasterProtein	ch09u_Q9UHL4	Dipeptidyl peptidase 2 OS=Homo sapiens GN=DPP7 PE=1 SV=3	0	17.877	7.52033	3	21	3	1	492	54.3	6.32	Peak Found	High	High	High	High	High		3.551	2.6	3.389	43.9	55.5	45.6	156.1	144.5	154.4	0.532	0	24.33	3	298	3
FALSE	High	IsMasterProtein	ch04u_D6RAX7	COP9 constitutive photomorphogenic-like protein subunit 4 isoform 2 OS=Homo sapiens GN=COPS4 PE=1 SV=1	0	17.813	8.57143	3	22	3	1	420	47.7	6.43	High	High	High	Not Found	Peak Found	Peak Found		0.01	0.075	2.219	200	186.1	62.1		13.9	137.9	0.425	0	23.45	3	294	3
FALSE	High	IsMasterProtein	ch14u_Q14112	Nidogen-2 OS=Homo sapiens GN=NID2 PE=1 SV=3	0	17.807	3.34545	3	12	3	1	1375	151.2	5.29	Not Found	Peak Found	Peak Found	High	High	High		100	4.733	9.218		34.9	19.6	200	165.1	180.4	0.116	0	19.84	3	259	3
FALSE	High	IsMasterProtein	ch17i_P61289-2	Isoform 2 of Proteasome activator complex subunit 3 OS=Homo sapiens GN=PSME3	0	17.689	18.7266	5	18	5	1	267	30.9	6.11	High	High	High	Peak Found	Peak Found	Peak Found	Acetyl [N-Term]	0.093	0.091	0.09	182.9	183.3	183.5	17.1	16.7	16.5	0.778	0	14.58	4	213	5
FALSE	High	IsMasterProtein	A8K7Q1	cDNA FLJ77770, highly similar to Homo sapiens nucleobindin 1 (NUCB1), mRNA OS=Homo sapiens PE=2 SV=1	0	17.657	13.8829	4	19	4	1	461	53.9	5.25	High	High	High	High	High	High		1.466	1.277	1.267	81.1	87.9	88.2	118.9	112.1	111.8	0.45	0	22.83	4	77	3
FALSE	High	IsMasterProtein	Q5JWF2	Guanine nucleotide-binding protein G(s) subunit alpha isoforms XLas OS=Homo sapiens GN=GNAS PE=1 SV=2	0	17.655	4.72517	4	26	3	1	1037	111	5.03	High	High	High	Peak Found	Peak Found	Not Found		0.246	0.257	0.244	160.6	159.1	160.8	39.4	40.9	39.2	0.365	1	19.76	4	311	4
FALSE	High	IsMasterProtein	ch04u_P20933	N(4)-(beta-N-acetylglucosaminyl)-L-asparaginase OS=Homo sapiens GN=AGA PE=1 SV=2	0	17.609	23.1214	5	34	5	1	346	37.2	6.28	Peak Found	Peak Found	Peak Found	High	High	High		4.979	5.782	5.65	33.5	29.5	30.1	166.5	170.5	169.9	1.239	0	16.54	5	151	5
FALSE	High	IsMasterProtein	B2R6K4	cDNA, FLJ92996, highly similar to Homo sapiens guanine nucleotide binding protein (G protein), beta polypeptide 1 (GNB1), mRNA OS=Homo sapiens PE=2 SV=1	0	17.45	8.82353	2	8	2	1	340	37.3	6.18	High	High	High	Not Found	Peak Found	Peak Found	Acetyl [N-Term]		0.219	0.103		164.1	181.3		35.9	18.7	0.334	0	6.97	1	217	2
FALSE	High	IsMasterProtein	ch05i_Q96CN7	Isochorismatase domain-containing protein 1 OS=Homo sapiens GN=ISOC1 PE=1 SV=3	0	17.403	17.4497	5	22	5	1	298	32.2	7.39	High	High	High	Peak Found	Peak Found	Peak Found		0.019	0.033	0.029	196.2	193.6	194.3	3.8	6.4	5.7	1.054	0	22.09	5	279	5
FALSE	High	IsMasterProtein	A8K4W0	40S ribosomal protein S3a OS=Homo sapiens GN=RPS3A PE=2 SV=1	0	17.352	17.803	4	12	4	1	264	29.9	9.73	High	High	High	Peak Found	Peak Found	Peak Found		0.16	0.065	0.135	172.4	187.9	176.2	27.6	12.1	23.8	0.624	0	12.66	4	120	4
FALSE	High	IsMasterProtein	ch19u_Q9Y230	RuvB-like 2 OS=Homo sapiens GN=RUVBL2 PE=1 SV=3	0	17.283	14.6868	6	23	6	1	463	51.1	5.64	High	High	High	Peak Found	Peak Found	Peak Found		0.131	0.248	0.148	176.9	160.3	174.2	23.1	39.7	25.8	0.61	0	22.79	6	186	6
FALSE	High	IsMasterProtein	Q6LES2	Annexin (Fragment) OS=Homo sapiens GN=ANXA4 PE=2 SV=1	0	17.239	18.0685	5	21	5	1	321	36.1	6.13	High	High	High	Peak Found	Peak Found	Peak Found		0.303	0.297	0.295	153.4	154.2	154.4	46.6	45.8	45.6	0.616	0	15.97	5	217	5
FALSE	High	IsMasterProtein	A6XNE2	Complement factor D preproprotein OS=Homo sapiens PE=2 SV=1	0	17.219	25	3	6	3	1	260	27.8	7.25	Not Found	Not Found	Not Found	High	Not Found	High		100		100				200		200	0.638	0	6.6	3	115	3
FALSE	High	IsMasterProtein	ch05u_Q08629	Testican-1 OS=Homo sapiens GN=SPOCK1 PE=1 SV=1	0	17.204	9.79499	4	22	4	1	439	49.1	6.1	Not Found	Peak Found	Not Found	High	High	High		100	39.177	100		5		200	195	200	0.585	0	27.67	4	245	3
FALSE	High	IsMasterProtein	A8K6V3	cDNA FLJ78677, highly similar to Homo sapiens splicing factor 3b, subunit 3, 130kDa (SF3B3), mRNA OS=Homo sapiens PE=2 SV=1	0	17.002	5.17666	4	18	4	1	1217	135.5	5.21	High	High	High	Not Found	Not Found	Not Found		0.01	0.01	0.01	200	200	200				0.152	0	19.52	4	99	4
FALSE	High	IsMasterProtein	A0A024R1J0	C1q and tumor necrosis factor related protein 6, isoform CRA_a OS=Homo sapiens GN=C1QTNF6 PE=4 SV=1	0	16.988	12.9496	3	18	3	1	278	30.8	6.34	Peak Found	High	High	High	High	High		3.278	3.237	4.014	46.8	47.2	39.9	153.2	152.8	160.1	1.154	0	17.22	3	136	3
FALSE	High	IsMasterProtein	V9HW43	Epididymis secretory protein Li 102 OS=Homo sapiens GN=HEL-S-102 PE=2 SV=1	0	16.942	13.1707	2	18	2	1	205	22.8	6.4	High	High	High	High	High	High		0.285	0.304	0.335	155.7	153.4	149.8	44.3	46.6	50.2	0.701	0	11.36	2	293	2
FALSE	High	IsMasterProtein	P81605-2	Isoform 2 of Dermcidin OS=Homo sapiens GN=DCD	0	16.842	11.5702	2	30	2	1	121	12.4	7.97	High	High	High	Not Found	Not Found	Not Found		0.01	0.01	0.01	200	200	200				1.371	0	33.31	2	388	2
FALSE	High	IsMasterProtein	ch02i_X5D2Q8	Neuropilin 2 isoform A (Fragment) OS=Homo sapiens GN=NRP2 PE=1 SV=1	0	16.655	4.7261	3	8	3	1	931	104.8	5.17	Not Found	Not Found	Not Found	High	High	High		100	100	100				200	200	200	0.124	0	11.31	3	177	3
FALSE	High	IsMasterProtein	D3DTP7	Phospholipid scramblase OS=Homo sapiens GN=hCG_1987383 PE=3 SV=1	0	16.534	8.57143	2	16	2	1	350	37.7	7.81	High	High	High	High	High	High		0.474	0.462	0.57	135.7	136.8	127.4	64.3	63.2	72.6	0.848	0	12.92	2	129	2
FALSE	High	IsMasterProtein	ch19i_P62280	40S ribosomal protein S11 OS=Homo sapiens GN=RPS11 PE=1 SV=3	0	16.373	30.3797	5	20	5	1	158	18.4	10.3	High	High	High	Peak Found	Peak Found	Peak Found		0.164	0.162	0.18	171.8	172.1	169.5	28.2	27.9	30.5	2.981	0	15.83	5	177	5
FALSE	High	IsMasterProtein	ch01i_Q99598	Translin-associated protein X OS=Homo sapiens GN=TSNAX PE=1 SV=1	0	16.361	11.0345	4	27	4	1	290	33.1	6.55	High	High	High	Peak Found	Peak Found	High		0.239	0.238	0.265	161.4	161.5	158.1	38.6	38.5	41.9	0.778	0	27.59	4	235	4
FALSE	High	IsMasterProtein	A0A024R2W4	Dystroglycan 1 (Dystrophin-associated glycoprotein 1), isoform CRA_a OS=Homo sapiens GN=DAG1 PE=4 SV=1	0	16.278	4.13408	2	10	2	1	895	97.5	8.56	Not Found	Not Found	Not Found	High	High	High		100	100	100				200	200	200	0.096	0	16.12	2	181	2
FALSE	High	IsMasterProtein	ch01u_Q12905	Interleukin enhancer-binding factor 2 OS=Homo sapiens GN=ILF2 PE=1 SV=2	0	16.162	8.71795	2	12	2	1	390	43	5.26	High	High	High	Not Found	Not Found	Not Found		0.01	0.01	0.01	200	200	200				0.245	0	17.21	2	257	2
FALSE	High	IsMasterProtein	Q9NRN5	Olfactomedin-like protein 3 OS=Homo sapiens GN=OLFML3 PE=2 SV=1	0	16.154	5.66502	2	12	2	1	406	46	6.57	Peak Found	Peak Found	Not Found	High	High	High		8.071	14.822		22	12.6		178	187.4		0.334	0	10.6	2	238	2
FALSE	High	IsMasterProtein	Q59EJ3	Heat shock 70kDa protein 1A variant (Fragment) OS=Homo sapiens PE=2 SV=1	0	16.082	4.09027	2	42	1	1	709	77.4	6.3	Not Found	High	High	Not Found	Peak Found	Peak Found			0.202	0.265		166.5	158.1		33.5	41.9	0.166	0	36.07	2	582	2
FALSE	High	IsMasterProtein	ch01u_P14543	Nidogen-1 OS=Homo sapiens GN=NID1 PE=1 SV=3	0	15.875	2.1652	2	14	2	1	1247	136.3	5.29	High	High	High	High	High	High		1.336	1.466	1.067	85.6	81.1	96.8	114.4	118.9	103.2	0.122	0	19.65	2	279	2
FALSE	High	IsMasterProtein	Q92743	Serine protease HTRA1 OS=Homo sapiens GN=HTRA1 PE=1 SV=1	0	15.849	7.29167	3	16	3	1	480	51.3	7.83	Peak Found	High	Peak Found	High	High	High		3.915	4.644	4.937	40.7	35.4	33.7	159.3	164.6	166.3	0.492	0	24.5	3	84	3
FALSE	High	IsMasterProtein	ch08i_Q9UK41-2	Isoform 2 of Vacuolar protein sorting-associated protein 28 homolog OS=Homo sapiens GN=VPS28	0	15.81	14.1631	2	10	2	1	233	26.4	7.72	High	High	High	Peak Found	Not Found	Peak Found		0.697	0.01	0.685	117.8	200	118.7	82.2		81.3	0.359	0	13.28	2	214	2
FALSE	High	IsMasterProtein	ch07u_P62879	Guanine nucleotide-binding protein G(I)/G(S)/G(T) subunit beta-2 OS=Homo sapiens GN=GNB2 PE=1 SV=3	0	15.791	11.4706	3	10	3	1	340	37.3	6	High	High	High	Peak Found	Peak Found	Peak Found	Acetyl [N-Term]	0.171	0.389	0.268	170.8	144	157.7	29.2	56	42.3	0.778	0	2.6	1	113	3
FALSE	High	IsMasterProtein	V9HWC7	Epididymis secretory sperm binding protein Li 128m OS=Homo sapiens GN=HEL-S-128m PE=2 SV=1	0	15.771	17.4107	4	22	4	1	224	25	6.38	High	High	High	High	Peak Found	High		0.102	0.133	0.123	181.4	176.5	178.1	18.6	23.5	21.9	1.054	0	14.8	4	118	4
FALSE	High	IsMasterProtein	ch05u_Q9NZL9	Methionine adenosyltransferase 2 subunit beta OS=Homo sapiens GN=MAT2B PE=1 SV=1	0	15.769	11.0778	2	8	2	1	334	37.5	7.36	High	High	High	Not Found	Peak Found	Not Found			0.261			158.6			41.4		0.245	0	11.95	2	106	2
FALSE	High	IsMasterProtein	ch14u_H0YJ03	Proteasome subunit alpha type-3 (Fragment) OS=Homo sapiens GN=PSMA3 PE=1 SV=1	0	15.763	26.506	2	20	1	1	83	9.7	4.87	Not Found	High	High	Not Found	Not Found	Not Found			0.01	0.01		200	200				5.31	0	28.33	2	86	2
FALSE	High	IsMasterProtein	ch01u_P08754	Guanine nucleotide-binding protein G(k) subunit alpha OS=Homo sapiens GN=GNAI3 PE=1 SV=3	0	15.39	7.34463	2	18	1	1	354	40.5	5.69	High	High	High	Not Found	Not Found	Not Found		0.01	0.01	0.01	200	200	200				0.438	0	22.9	2	310	2
FALSE	High	IsMasterProtein	A0A024R5F9	UDP-GlcNAc:betaGal beta-1,3-N-acetylglucosaminyltransferase 6, isoform CRA_a OS=Homo sapiens GN=B3GNT6 PE=4 SV=1	0	14.87	3.85542	1	8	1	1	415	47.1	7.2	Not Found	High	Not Found	Not Found	High	Not Found			0.744			114.6			85.4		0.259	0	10.85	1	275	1
FALSE	High	IsMasterProtein	ch19i_P43686	26S protease regulatory subunit 6B OS=Homo sapiens GN=PSMC4 PE=1 SV=2	0	14.859	14.8325	4	16	4	1	418	47.3	5.21	High	High	High	Peak Found	Peak Found	Peak Found		0.129	0.09	0.101	177.2	183.4	181.6	22.8	16.6	18.4	0.445	0	16.49	4	202	4
FALSE	High	IsMasterProtein	A0A087X117	Nodal modulator 1 OS=Homo sapiens GN=NOMO1 PE=1 SV=1	0	14.823	3.07814	3	12	3	1	1267	139.4	5.85	Not Found	Not Found	Not Found	High	High	High				100						200	0.098	0	14.99	3	168	3
FALSE	High	IsMasterProtein	ch17u_P28072	Proteasome subunit beta type-6 OS=Homo sapiens GN=PSMB6 PE=1 SV=4	0	14.724	8.78661	2	61	2	1	239	25.3	4.92	High	High	High	High	High	High		0.156	0.155	0.16	173	173.1	172.4	27	26.9	27.6	1.031	0	56.78	2	777	2
FALSE	High	IsMasterProtein	A8K8U1	cDNA FLJ77762, highly similar to Homo sapiens cullin-associated and neddylation-dissociated 1 (CAND1), mRNA OS=Homo sapiens PE=2 SV=1	0	14.533	2.11382	2	10	2	1	1230	136.2	5.83	High	High	High	Not Found	Peak Found	Peak Found			0.227	0.079		163	185.3		37	14.7	0.066	0	11.73	2	196	2
FALSE	High	IsMasterProtein	A4D1W8	Ependymin related protein 1 (Zebrafish), isoform CRA_b OS=Homo sapiens GN=UCC1 PE=4 SV=1	0	14.506	6.68605	2	22	2	1	344	38.1	9.58	High	High	High	High	High	High		4.622	4.49	5.009	35.6	36.4	33.3	164.4	163.6	166.7	0.389	0	23.26	2	348	2
FALSE	High	IsMasterProtein	P26038	Moesin OS=Homo sapiens GN=MSN PE=1 SV=3	0	14.299	9.18544	5	34	5	1	577	67.8	6.4	High	High	High	Not Found	Peak Found	Peak Found		0.01	0.039	0.228	200	192.5	162.9		7.5	37.1	0.324	0	14.82	5	210	5
FALSE	High	IsMasterProtein	A0A024R944	Serpin peptidase inhibitor, clade C (Antithrombin), member 1, isoform CRA_a OS=Homo sapiens GN=SERPINC1 PE=3 SV=1	0	14.292	4.31034	2	64	2	1	464	52.6	6.71	High	High	High	Not Found	Not Found	Not Found		0.01	0.01	0.01	200	200	200				0.259	0	69.52	2	433	2
FALSE	High	IsMasterProtein	ch01i_Q09028	Histone-binding protein RBBP4 OS=Homo sapiens GN=RBBP4 PE=1 SV=3	0	14.26	3.29412	1	4	1	1	425	47.6	4.89	High	High	Not Found	Peak Found	Peak Found	Not Found	Acetyl [N-Term]	0.149	0.216		174	164.5		26	35.5		0.259	0			195	1
FALSE	High	IsMasterProtein	B7Z351	Secreted phosphoprotein 1 variant 6 OS=Homo sapiens GN=SPP1 PE=2 SV=1	0	14.238	11.9266	3	22	3	1	327	37.2	4.73	Not Found	Not Found	Not Found	High	High	High		100	100	100				200	200	200	0.701	0	27.52	2	770	3
FALSE	High	IsMasterProtein	ch06i_P62906	60S ribosomal protein L10a OS=Homo sapiens GN=RPL10A PE=1 SV=2	0	14.216	5.99078	1	8	1	1	217	24.8	9.94	High	High	High	Not Found	Not Found	Not Found		0.01	0.01	0.01	200	200	200				0.359	0	11.16	1	159	1
FALSE	High	IsMasterProtein	P55786	Puromycin-sensitive aminopeptidase OS=Homo sapiens GN=NPEPPS PE=1 SV=2	0	14.203	3.9173	3	12	3	1	919	103.2	5.72	High	High	High	Not Found	Peak Found	High			0.324	0.818		151	110		49	90	0.175	0	12.96	3	106	3
FALSE	High	IsMasterProtein	ch05u_Q9H1C7	Cysteine-rich and transmembrane domain-containing protein 1 OS=Homo sapiens GN=CYSTM1 PE=1 SV=1	0	14.191	11.3402	2	17	2	1	97	10.6	4.32	High	Peak Found	High	High	High	High		0.939	0.919	0.873	103.2	104.2	106.8	96.8	95.8	93.2	99	0	13.22	2	136	2
FALSE	High	IsMasterProtein	O43291	Kunitz-type protease inhibitor 2 OS=Homo sapiens GN=SPINT2 PE=1 SV=2	0	14.129	10.3175	2	11	2	1	252	28.2	8.29	High	Peak Found	Peak Found	High	High	High		3.15	3.146	3.224	48.2	48.2	47.3	151.8	151.8	152.7	1.031	0	10.43	2	129	2
FALSE	High	IsMasterProtein	A5PLK9	Metalloendopeptidase OS=Homo sapiens GN=BMP1 PE=2 SV=1	0	14.122	5.07099	4	10	4	1	986	111.2	6.83	Peak Found	Not Found	Peak Found	High	Not Found	High		17.502		10.065	10.8		18.1	189.2		181.9	0.169	0	10.86	4	59	4
FALSE	High	IsMasterProtein	P12931-2	Isoform 2 of Proto-oncogene tyrosine-protein kinase Src OS=Homo sapiens GN=SRC	0	14.108	7.19557	3	11	3	1	542	60.6	7.84	High	Peak Found	Peak Found	High	High	High		0.348	0.376	0.324	148.4	145.4	151.1	51.6	54.6	48.9	0.346	0	4.2	3	90	3
FALSE	High	IsMasterProtein	ch17i_Q9UNS2	COP9 signalosome complex subunit 3 OS=Homo sapiens GN=COPS3 PE=1 SV=3	0	14.031	2.83688	1	6	1	1	423	47.8	6.65	High	High	High	Peak Found	Peak Found	Peak Found	Acetyl [N-Term]	0.14	0.135	0.123	175.5	176.1	178.1	24.5	23.9	21.9	0.186	0			248	1
FALSE	High	IsMasterProtein	ch09i_P61106	Ras-related protein Rab-14 OS=Homo sapiens GN=RAB14 PE=1 SV=4	0	13.973	11.6279	2	16	1	1	215	23.9	6.21	Not Found	Not Found	High	Not Found	Not Found	Not Found				0.01			200				0.585	0	17.54	2	189	2
FALSE	High	IsMasterProtein	B2RDY9	Adenylyl cyclase-associated protein OS=Homo sapiens PE=2 SV=1	0	13.949	7.15789	2	10	2	1	475	51.6	8.22	Not Found	High	High	Not Found	Not Found	High			0.01	0.296		200	154.4			45.6	0.322	0	9.77	2	93	2
FALSE	High	IsMasterProtein	ch19u_P62249	40S ribosomal protein S16 OS=Homo sapiens GN=RPS16 PE=1 SV=2	0	13.871	37.6712	6	29	6	1	146	16.4	10.21	High	High	High	Peak Found	Peak Found	Peak Found		0.209	0.143	0.099	165.5	175	182	34.5	25	18	2.162	0	12.36	5	135	6
FALSE	High	IsMasterProtein	Q96JB3	Hypermethylated in cancer 2 protein OS=Homo sapiens GN=HIC2 PE=1 SV=2	0	13.858	1.62602	1	67	1	1	615	66.1	6.38	High	High	High	High	High	High		2.572	2.575	2.556	56	56	56.2	144	144	143.8	0.346	0	44.81	1	97	1
FALSE	High	IsMasterProtein	P18827	Syndecan-1 OS=Homo sapiens GN=SDC1 PE=1 SV=3	0	13.782	5.48387	1	22	1	1	310	32.4	4.63	High	High	High	High	High	High		0.8	0.819	0.799	111.1	110	111.2	88.9	90	88.8	0.52	0	29.33	1	315	1
FALSE	High	IsMasterProtein	ch19u_P30530	Tyrosine-protein kinase receptor UFO OS=Homo sapiens GN=AXL PE=1 SV=3	0	13.72	2.57271	2	28	2	1	894	98.3	5.43	High	High	Peak Found	High	High	High		3.232	3.369	3.72	47.3	45.8	42.4	152.7	154.2	157.6	0.179	0	34.77	2	318	2
FALSE	High	IsMasterProtein	P08123	Collagen alpha-2(I) chain OS=Homo sapiens GN=COL1A2 PE=1 SV=7	0	13.625	2.12299	2	10	2	1	1366	129.2	8.95	High	High	High	Not Found	Not Found	Not Found		0.01	0.01	0.01	200	200	200				0.057	0	8.32	2	208	2
FALSE	High	IsMasterProtein	ch10i_Q9UGM3-9	Isoform 9 of Deleted in malignant brain tumors 1 protein OS=Homo sapiens GN=DMBT1	0	13.499	1.85349	1	4	1	1	1133	124.4	5.4	High	Not Found	High	Not Found	Not Found	Not Found		0.01		0.01	200		200				0.056	0	6.8	1	258	1
FALSE	High	IsMasterProtein	ch20u_P01034	Cystatin-C OS=Homo sapiens GN=CST3 PE=1 SV=1	0	13.466	19.1781	2	16	2	1	146	15.8	8.75	Peak Found	Peak Found	Peak Found	High	High	High		9.499	7.855	8.359	19	22.6	21.4	181	177.4	178.6	0.585	0	14.77	2	286	2
FALSE	High	IsMasterProtein	ch03u_O15162	Phospholipid scramblase 1 OS=Homo sapiens GN=PLSCR1 PE=1 SV=1	0	13.344	4.08805	1	12	1	1	318	35	4.94	High	High	High	High	High	High		0.534	0.628	0.749	130.4	122.9	114.3	69.6	77.1	85.7	0.52	0	13.77	1	223	1
FALSE	High	IsMasterProtein	ch17u_P36955	Pigment epithelium-derived factor OS=Homo sapiens GN=SERPINF1 PE=1 SV=4	0	13.343	9.09091	3	10	3	1	418	46.3	6.38	High	High	High	Not Found	Not Found	Not Found		0.01	0.01	0.01	200	200	200				0.334	0	8.04	3	105	3
FALSE	High	IsMasterProtein	A0A1C7CYX9	Dihydropyrimidinase-related protein 2 OS=Homo sapiens GN=DPYSL2 PE=1 SV=1	0	13.197	7.0901	3	11	3	1	677	73.5	6.35	High	High	High	Not Found	Peak Found	Not Found		0.01	0.332	0.01	200	150.2	200		49.8		0.184	0	13.87	3	168	2
FALSE	High	IsMasterProtein	P30101	Protein disulfide-isomerase A3 OS=Homo sapiens GN=PDIA3 PE=1 SV=4	0	13.031	7.12871	3	16	3	1	505	56.7	6.35	High	High	High	Peak Found	Peak Found	Peak Found		0.061	0.039	0.074	188.6	192.6	186.2	11.4	7.4	13.8	0.233	0	19.36	3	192	3
FALSE	High	IsMasterProtein	ch10u_O75436	Vacuolar protein sorting-associated protein 26A OS=Homo sapiens GN=VPS26A PE=1 SV=2	0	13.008	9.17431	2	8	2	1	327	38.1	6.57	High	High	High	High	Not Found	Not Found		0.37			146			54			0.233	0	11.14	2	164	2
FALSE	High	IsMasterProtein	B7Z268	Single-stranded DNA binding protein 1, isoform CRA_c OS=Homo sapiens GN=SSBP1 PE=2 SV=1	0	12.945	20.7547	3	26	3	1	159	18.5	10.1	High	High	High	Peak Found	Peak Found	High		0.071	0.079	0.076	186.7	185.4	185.8	13.3	14.6	14.2	1.031	0	19.42	3	341	3
FALSE	High	IsMasterProtein	ch07u_P41250	Glycine--tRNA ligase OS=Homo sapiens GN=GARS PE=1 SV=3	0	12.907	4.60081	2	18	2	1	739	83.1	7.03	High	High	High	Peak Found	Peak Found	Peak Found		0.016	0.108	0.113	196.8	180.5	179.6	3.2	19.5	20.4	0.094	0	17.7	2	250	2
FALSE	High	IsMasterProtein	Q53GQ2	COP9 constitutive photomorphogenic homolog subunit 7B variant (Fragment) OS=Homo sapiens PE=2 SV=1	0	12.824	14.0152	3	16	3	1	264	29.5	6.68	High	High	High	Peak Found	Peak Found	Peak Found		0.077	0.062	0.064	185.7	188.4	187.9	14.3	11.6	12.1	0.778	0	17.83	3	213	3
FALSE	High	IsMasterProtein	P04899-4	Isoform sGi2 of Guanine nucleotide-binding protein G(i) subunit alpha-2 OS=Homo sapiens GN=GNAI2	0	12.776	7.10383	2	18	1	1	366	41.5	5.99	High	High	High	Not Found	Not Found	Not Found		0.01	0.01	0.01	200	200	200				0.389	0	20.33	2	262	2
FALSE	High	IsMasterProtein	ch12u_P62805	Histone H4 OS=Homo sapiens GN=HIST1H4A PE=1 SV=2	0	12.75	20.3883	3	22	3	1	103	11.4	11.36	High	High	High	Peak Found	Peak Found	Peak Found		0.123	0.13	0.116	178.1	177	179.2	21.9	23	20.8	3.642	0	12.51	3	113	3
FALSE	High	IsMasterProtein	B4DI54	cDNA FLJ56386, highly similar to Heat shock 70 kDa protein 1L OS=Homo sapiens PE=2 SV=1	0	12.625	4.25532	2	40	1	1	705	77.5	8.06	High	Not Found	Not Found	Not Found	Not Found	Not Found											0.166	0	30.79	2	505	2
FALSE	High	IsMasterProtein	ch02i_Q15365	Poly(rC)-binding protein 1 OS=Homo sapiens GN=PCBP1 PE=1 SV=2	0	12.589	7.02247	2	10	1	1	356	37.5	7.09	Not Found	High	Not Found	Not Found	Not Found	Not Found											0.389	0	6.21	2	133	2
FALSE	High	IsMasterProtein	Q14344	Guanine nucleotide-binding protein subunit alpha-13 OS=Homo sapiens GN=GNA13 PE=1 SV=2	0	12.582	5.57029	2	18	1	1	377	44	8	High	High	High	Peak Found	Peak Found	Peak Found		0.3	0.508	0.383	153.8	132.6	144.6	46.2	67.4	55.4	0.318	0	20.64	2	277	2
FALSE	High	IsMasterProtein	Q59FI4	Importin 4 variant (Fragment) OS=Homo sapiens PE=2 SV=1	0	12.558	3.87658	3	8	3	1	1264	138.1	5.25	High	High	High	Not Found	Not Found	Peak Found			0.01	0.177		200	169.9			30.1	0.107	0	8.83	3	61	3
FALSE	High	IsMasterProtein	Q16658	Fascin OS=Homo sapiens GN=FSCN1 PE=1 SV=3	0	12.515	7.30223	3	14	3	1	493	54.5	7.24	High	High	High	Not Found	Peak Found	Peak Found			0.076	0.077		185.8	185.7		14.2	14.3	0.269	0	16.56	3	68	3
FALSE	High	IsMasterProtein	ch20i_P55060	Exportin-2 OS=Homo sapiens GN=CSE1L PE=1 SV=3	0	12.505	1.75077	1	4	1	1	971	110.3	5.77	Not Found	Not Found	Not Found	Not Found	Not Found	Not Found											0.083	0	5.83	1	71	1
FALSE	High	IsMasterProtein	Q99816	Tumor susceptibility gene 101 protein OS=Homo sapiens GN=TSG101 PE=1 SV=2	0	12.474	3.07692	1	8	1	1	390	43.9	6.46	High	Peak Found	Peak Found	High	High	High		0.766	0.608	0.781	113.3	124.4	112.3	86.7	75.6	87.7	0.274	0	11.97	1	167	1
FALSE	High	IsMasterProtein	chXu_P41091	Eukaryotic translation initiation factor 2 subunit 3 OS=Homo sapiens GN=EIF2S3 PE=1 SV=3	0	12.303	6.35593	2	5	2	1	472	51.1	8.4	High	High	High	Not Found	Not Found	Not Found	Acetyl [N-Term]	0.01	0.01	0.01	200	200	200				0.212	0	2.33	1	131	2
FALSE	High	IsMasterProtein	ch06u_A0A0C4DFU2	Superoxide dismutase OS=Homo sapiens GN=SOD2 PE=1 SV=1	0	12.297	22.0721	4	15	4	1	222	24.7	8.25	High	High	High	Peak Found	Peak Found	Not Found		0.051	0.115		190.2	179.4		9.8	20.6		1.031	0	4.9	4	56	3
FALSE	High	IsMasterProtein	P00734	Prothrombin OS=Homo sapiens GN=F2 PE=1 SV=2	0	12.277	7.71704	4	27	4	1	622	70	5.9	High	High	High	Not Found	Peak Found	Peak Found		0.01	0.134	0.01	200	176.3	200		23.7		0.301	0	21.38	4	191	3
FALSE	High	IsMasterProtein	A8K7L9	cDNA FLJ77787 OS=Homo sapiens PE=2 SV=1	0	12.275	7.90378	2	13	2	1	291	32.7	7.3	High	High	High	High	High	High		5.627	4.542	4.914	30.2	36.1	33.8	169.8	163.9	166.2	0.719	0	13.76	1	154	2
FALSE	High	IsMasterProtein	ch15u_H3BTH8	Hyaluronan and proteoglycan link protein 3 OS=Homo sapiens GN=HAPLN3 PE=1 SV=1	0	12.261	13.2701	5	18	4	1	422	47.7	6.68	Peak Found	Not Found	Peak Found	High	Not Found	High		7.727	6.407	6.914	22.9	27	25.3	177.1	173	174.7	0.616	1	14.66	5	119	5
FALSE	High	IsMasterProtein	ch01u_P04066	Tissue alpha-L-fucosidase OS=Homo sapiens GN=FUCA1 PE=1 SV=4	0	12.199	6.00858	2	16	2	1	466	53.7	6.84	High	High	High	High	High	High		6.271	7.366	8.313	27.5	23.9	21.5	172.5	176.1	178.5	0.318	0	19.99	2	151	2
FALSE	High	IsMasterProtein	chXu_P62701	40S ribosomal protein S4, X isoform OS=Homo sapiens GN=RPS4X PE=1 SV=2	0	12.152	12.1673	4	18	4	1	263	29.6	10.15	High	High	High	Peak Found	High	Peak Found		0.182	0.122	0.15	169.3	178.3	173.8	30.7	21.7	26.2	0.778	0	8.06	4	104	4
FALSE	High	IsMasterProtein	ch17u_P04278	Sex hormone-binding globulin OS=Homo sapiens GN=SHBG PE=1 SV=2	0	12.127	7.46269	2	10	2	1	402	43.8	6.71	High	High	High	Not Found	Not Found	Not Found		0.01	0.01	0.01	200	200	200				0.222	0	14.13	2	191	2
FALSE	High	IsMasterProtein	Q15366-2	Isoform 2 of Poly(rC)-binding protein 2 OS=Homo sapiens GN=PCBP2	0	12.112	10.3825	3	18	2	1	366	38.6	6.79	High	High	Not Found	Peak Found	Peak Found	Not Found		0.125	0.01		177.8	200		22.2			0.585	2	11.27	3	167	3
FALSE	High	IsMasterProtein	A8K3I0	cDNA FLJ78437, highly similar to Homo sapiens cartilage oligomeric matrix protein (COMP), mRNA OS=Homo sapiens PE=2 SV=1	0	11.937	6.20872	3	16	3	1	757	82.8	4.59	High	High	High	Not Found	Not Found	Not Found		0.01	0.01		200	200					0.283	0	5.74	3	101	3
FALSE	High	IsMasterProtein	B7Z8Q2	cDNA FLJ55606, highly similar to Alpha-2-HS-glycoprotein OS=Homo sapiens PE=2 SV=1	0	11.921	3.00231	1	10	1	1	433	46.6	6.28	High	High	High	Not Found	Not Found	Not Found		0.01	0.01	0.01	200	200	200				0.233	0	13.83	1	153	1
FALSE	High	IsMasterProtein	P15291	Beta-1,4-galactosyltransferase 1 OS=Homo sapiens GN=B4GALT1 PE=1 SV=5	0	11.786	5.02513	2	16	2	1	398	43.9	8.65	High	High	High	High	High	High		1.225	1.499	1.542	89.9	80	78.7	110.1	120	121.3	0.468	0	16	2	181	2
FALSE	High	IsMasterProtein	A0A0D9SFP6	Tyrosine-protein kinase receptor OS=Homo sapiens GN=NTRK3 PE=1 SV=1	0	11.753	1.27315	1	14	1	1	864	97	6.68	High	High	High	High	High	High		1.117	1.117	1.106	94.5	94.5	95	105.5	105.5	105	0.116	0	13.58	1	137	1
FALSE	High	IsMasterProtein	ch03i_C9JIF9	Acylamino-acid-releasing enzyme OS=Homo sapiens GN=APEH PE=1 SV=1	0	11.719	6.3772	4	12	4	1	737	81.6	5.54	High	High	High	Not Found	Peak Found	Peak Found			0.446	0.017		138.3	196.7		61.7	3.3	0.283	0	11.06	4	47	4
FALSE	High	IsMasterProtein	O75787	Renin receptor OS=Homo sapiens GN=ATP6AP2 PE=1 SV=2	0	11.702	8.28571	3	19	3	1	350	39	6.1	High	High	High	High	High	High		7.115	7.44	10.496	24.6	23.7	17.4	175.4	176.3	182.6	0.719	0	10.63	3	66	3
FALSE	High	IsMasterProtein	Q8N353	TMEM106B protein (Fragment) OS=Homo sapiens GN=TMEM106B PE=2 SV=1	0	11.68	8.59873	2	6	2	1	314	35.1	8.22	High	High	Not Found	Not Found	Not Found	Not Found			0.01			200					0.334	0	8.65	2	95	2
FALSE	High	IsMasterProtein	ch12u_F8VXU5	Vacuolar protein sorting-associated protein 29 OS=Homo sapiens GN=VPS29 PE=1 SV=1	0	11.407	10.7477	2	8	2	1	214	24	8.18	High	Not Found	Peak Found	Peak Found	Not Found	High		0.49			134.2			65.8			0.778	0	4.69	2	67	2
FALSE	High	IsMasterProtein	ch20i_Q9UBR2	Cathepsin Z OS=Homo sapiens GN=CTSZ PE=1 SV=1	0	11.349	9.57096	2	8	2	1	303	33.8	7.11	Not Found	Not Found	Peak Found	High	High	High		100	100	9.879			18.4	200	200	181.6	0.334	0	14.48	2	44	2
FALSE	High	IsMasterProtein	P35555	Fibrillin-1 OS=Homo sapiens GN=FBN1 PE=1 SV=3	0	11.333	2.08986	4	16	2	1	2871	312	4.93	Peak Found	Not Found	Not Found	High	Not Found	High		4.384		100	37.1			162.9		200	0.057	0	6.44	4	208	4
FALSE	High	IsMasterProtein	B4DLV7	Rab GDP dissociation inhibitor OS=Homo sapiens PE=2 SV=1	0	11.313	8.90869	3	15	3	1	449	51.1	8.18	High	High	High	Peak Found	Peak Found	Not Found		0.394	0.309	0.01	143.5	152.7	200	56.5	47.3		0.259	0	10.54	3	138	3
FALSE	High	IsMasterProtein	ch06i_P62269	40S ribosomal protein S18 OS=Homo sapiens GN=RPS18 PE=1 SV=3	0	11.279	18.4211	3	18	3	1	152	17.7	10.99	High	High	High	Peak Found	Peak Found	Peak Found		0.132	0.121	0.151	176.6	178.4	173.7	23.4	21.6	26.3	0.778	0	12.62	3	161	3
FALSE	High	IsMasterProtein	Q53FA7	Quinone oxidoreductase PIG3 OS=Homo sapiens GN=TP53I3 PE=1 SV=2	0	11.266	10.241	3	10	3	1	332	35.5	7.17	High	High	High	Peak Found	Not Found	Peak Found		0.155	0.01	0.251	173.2	200	159.9	26.8		40.1	0.468	0	11.96	3	159	3
FALSE	High	IsMasterProtein	ch10u_O95858	Tetraspanin-15 OS=Homo sapiens GN=TSPAN15 PE=1 SV=1	0	11.235	4.08163	1	6	1	1	294	33.1	5.48	Not Found	High	Not Found	Not Found	High	Not Found			0.284			155.7			44.3		0.389	0	7.03	1	157	1
FALSE	High	IsMasterProtein	ch02i_Q99832	T-complex protein 1 subunit eta OS=Homo sapiens GN=CCT7 PE=1 SV=2	0	11.116	6.99816	5	20	5	1	543	59.3	7.65	High	High	High	Peak Found	Not Found	Peak Found		0.093	0.01	0.057	183.1	200	189.3	16.9		10.7	0.377	0	12.5	5	137	5
FALSE	High	IsMasterProtein	Q9NQC3	Reticulon-4 OS=Homo sapiens GN=RTN4 PE=1 SV=2	0	11.112	2.2651	2	18	2	1	1192	129.9	4.5	High	High	High	Peak Found	Peak Found	Peak Found		0.056	0.052	0.06	189.4	190.2	188.6	10.6	9.8	11.4	0.086	0	24.89	2	107	2
FALSE	High	IsMasterProtein	P00492	Hypoxanthine-guanine phosphoribosyltransferase OS=Homo sapiens GN=HPRT1 PE=1 SV=2	0	11.084	11.9266	2	6	2	1	218	24.6	6.68	High	High	High	Not Found	Not Found	Peak Found				0.055			189.6			10.4	0.425	0	4.65	2	81	2
FALSE	High	IsMasterProtein	B4DMN1	cDNA FLJ61136, highly similar to Ras-related protein Rab-11A OS=Homo sapiens PE=2 SV=1	0	10.879	13.0268	3	12	3	1	261	28.8	8.38	Peak Found	Peak Found	Peak Found	High	High	High		0.236	0.244	0.252	161.8	160.7	159.8	38.2	39.3	40.2	0.501	0	15.03	3	114	3
FALSE	High	IsMasterProtein	ch17i_P43034	Platelet-activating factor acetylhydrolase IB subunit alpha OS=Homo sapiens GN=PAFAH1B1 PE=1 SV=2	0	10.855	6.34146	2	10	2	1	410	46.6	7.37	High	High	High	Peak Found	Peak Found	Not Found		0.096	0.101		182.4	181.7		17.6	18.3		0.186	0	12.5	2	209	2
FALSE	High	IsMasterProtein	P11233	Ras-related protein Ral-A OS=Homo sapiens GN=RALA PE=1 SV=1	0	10.815	14.0777	2	12	2	1	206	23.6	7.11	High	High	High	High	High	High		0.26	0.23	0.216	158.7	162.7	164.5	41.3	37.3	35.5	0.52	0	11.68	2	151	2
FALSE	High	IsMasterProtein	B2R983	cDNA, FLJ94267, highly similar to Homo sapiens glutathione S-transferase omega 1 (GSTO1), mRNA OS=Homo sapiens PE=2 SV=1	0	10.761	19.917	5	25	5	1	241	27.5	6.6	High	High	High	High	Peak Found	High		0.111	0.264	0.122	180	158.3	178.2	20	41.7	21.8	1.371	0	10.73	5	116	5
FALSE	High	IsMasterProtein	B2M1S8	Delta-globin B2 variant (Fragment) OS=Homo sapiens GN=HBD PE=3 SV=1	0	10.734	31.4286	3	55	3	1	105	11.6	7.05	High	High	High	Not Found	Not Found	Not Found		0.01	0.01	0.01	200	200	200				2.162	0	51.12	3	504	3
FALSE	High	IsMasterProtein	B3KQQ9	cDNA PSEC0048 fis, clone NT2RP2000028, highly similar to Serine protease 23 OS=Homo sapiens PE=2 SV=1	0	10.691	10.1828	3	16	3	1	383	43	9.36	High	High	High	High	Peak Found	High		9.22	8.025	10.913	19.6	22.2	16.8	180.4	177.8	183.2	0.369	0	13.56	3	121	3
FALSE	High	IsMasterProtein	ch16i_A0A087WXI5	Cadherin-1 OS=Homo sapiens GN=CDH1 PE=1 SV=1	0	10.666	1.99336	2	14	2	1	903	100	4.79	Peak Found	High	High	High	High	High		2.611	2.502	2.911	55.4	57.1	51.1	144.6	142.9	148.9	0.194	0	5.81	2	80	2
FALSE	High	IsMasterProtein	ch08u_P78527	DNA-dependent protein kinase catalytic subunit OS=Homo sapiens GN=PRKDC PE=1 SV=3	0	10.642	0.702519	2	4	2	1	4128	468.8	7.12	Not Found	High	High	Not Found	Not Found	Not Found			0.01			200					0.018	0	4.73	2	69	2
FALSE	High	IsMasterProtein	ch03i_P49788	Retinoic acid receptor responder protein 1 OS=Homo sapiens GN=RARRES1 PE=1 SV=2	0	10.589	11.5646	3	22	3	1	294	33.3	8.51	Peak Found	Peak Found	Not Found	High	High	High		17.891	23.226	100	10.6	8.3		189.4	191.7	200	0.54	0	9.44	3	163	3
FALSE	High	IsMasterProtein	A0A0C4DGQ5	Calpain small subunit 1 OS=Homo sapiens GN=CAPNS1 PE=1 SV=1	0	10.506	7.76398	2	12	2	1	322	33.8	6.23	High	High	High	Peak Found	Peak Found	Peak Found		0.151	0.235	0.066	173.7	162	187.5	26.3	38	12.5	0.311	0	14.85	2	243	2
FALSE	High	IsMasterProtein	O15511-2	Isoform 2 of Actin-related protein 2/3 complex subunit 5 OS=Homo sapiens GN=ARPC5	0	10.479	11.6883	2	22	2	1	154	16.6	6.02	High	High	High	High	High	High		0.288	0.297	0.296	155.2	154.2	154.4	44.8	45.8	45.6	0.778	0	20.75	2	274	2
FALSE	High	IsMasterProtein	P62277	40S ribosomal protein S13 OS=Homo sapiens GN=RPS13 PE=1 SV=2	0	10.375	19.8675	3	18	3	1	151	17.2	10.54	High	High	High	High	High	High		0.226	0.209	0.219	163.2	165.5	164.1	36.8	34.5	35.9	1.31	0	10.02	3	73	3
FALSE	High	IsMasterProtein	ch22u_P62318	Small nuclear ribonucleoprotein Sm D3 OS=Homo sapiens GN=SNRPD3 PE=1 SV=1	0	10.356	7.93651	1	10	1	1	126	13.9	10.32	High	Peak Found	High	High	High	High		0.263	0.267	0.277	158.3	157.9	156.7	41.7	42.1	43.3	0.668	0	11.17	1	118	1
FALSE	High	IsMasterProtein	ch21i_P16152	Carbonyl reductase [NADPH] 1 OS=Homo sapiens GN=CBR1 PE=1 SV=3	0	10.349	5.77617	1	6	1	1	277	30.4	8.32	High	High	High	Not Found	Not Found	Not Found		0.01	0.01	0.01	200	200	200				0.136	0	7.5	1	251	1
FALSE	High	IsMasterProtein	A8K4T6	cDNA FLJ76282, highly similar to Homo sapiens proteasome (prosome, macropain) 26S subunit, non-ATPase, 5 (PSMD5), mRNA OS=Homo sapiens PE=2 SV=1	0	10.236	5.55556	2	5	2	1	504	56.2	5.57	High	High	High	Peak Found	Not Found	Not Found	Acetyl [N-Term]	0.1			181.7			18.3			0.155	0	2.15	1	140	2
FALSE	High	IsMasterProtein	ch16i_Q9UN37	Vacuolar protein sorting-associated protein 4A OS=Homo sapiens GN=VPS4A PE=1 SV=1	0	10.228	8.92449	3	12	3	1	437	48.9	7.8	High	High	High	High	Peak Found	High		0.509	0.507	0.673	132.5	132.7	119.6	67.5	67.3	80.4	0.359	0	13.5	3	91	3
FALSE	High	IsMasterProtein	P08833	Insulin-like growth factor-binding protein 1 OS=Homo sapiens GN=IGFBP1 PE=1 SV=1	0	10.225	11.583	2	5	2	1	259	27.9	5.19	Not Found	Not Found	Not Found	Not Found	High	High			100						200		0.425	0	2.7	2	55	2
FALSE	High	IsMasterProtein	P19883	Follistatin OS=Homo sapiens GN=FST PE=1 SV=2	0	10.192	14.2442	3	8	3	1	344	38	5.67	Not Found	High	Not Found	High	Peak Found	High			3.174	100		47.9			152.1	200	0.389	0	6	3	99	3
FALSE	High	IsMasterProtein	A8KAJ3	cDNA FLJ77823, highly similar to Homo sapiens EGF-containing fibulin-like extracellular matrix protein 1, transcript variant 3, mRNA OS=Homo sapiens PE=2 SV=1	0	9.894	7.70791	3	10	3	1	493	54.6	5.14	Not Found	Peak Found	Peak Found	High	High	High		100	1.007	6.377		99.7	27.1	200	100.3	172.9	0.304	0	7.31	3	95	3
FALSE	High	IsMasterProtein	A0A024R509	Arylsulfatase A, isoform CRA_a OS=Homo sapiens GN=ARSA PE=4 SV=1	0	9.868	10.2161	3	10	3	1	509	53.8	6.07	Not Found	Peak Found	Not Found	High	High	High			4.666			35.3			164.7		0.438	0	10.33	3	90	2
FALSE	High	IsMasterProtein	B2RA03	cDNA, FLJ94640, highly similar to Homo sapiens keratin 18 (KRT18), mRNA OS=Homo sapiens PE=2 SV=1	0	9.791	7.67442	3	26	3	1	430	48	5.38	High	High	High	Peak Found	Peak Found	Peak Found		0.108	0.114	0.195	180.6	179.5	167.4	19.4	20.5	32.6	0.25	0	21.77	3	331	3
FALSE	High	IsMasterProtein	Q99497	Protein deglycase DJ-1 OS=Homo sapiens GN=PARK7 PE=1 SV=2	0	9.764	16.4021	2	8	2	1	189	19.9	6.79	High	High	High	Not Found	Not Found	Peak Found				0.208			165.6			34.4	0.425	0	11.77	2	92	2
FALSE	High	IsMasterProtein	Q8TDQ7	Glucosamine-6-phosphate isomerase 2 OS=Homo sapiens GN=GNPDA2 PE=1 SV=1	0	9.736	14.4928	3	12	1	1	276	31.1	6.95	Not Found	Not Found	High	Not Found	Not Found	Peak Found				0.14			175.4			24.6	0.468	0	6.44	3	123	3
FALSE	High	IsMasterProtein	B4E1U9	cDNA FLJ54776, highly similar to Cell division control protein 42 homolog OS=Homo sapiens PE=2 SV=1	0	9.679	4.23729	1	14	1	1	236	26.5	7.59	High	High	High	High	High	High		0.251	0.247	0.263	159.9	160.4	158.4	40.1	39.6	41.6	0.52	0	10.42	1	171	1
FALSE	High	IsMasterProtein	ch14u_P23381	Tryptophan--tRNA ligase, cytoplasmic OS=Homo sapiens GN=WARS PE=1 SV=2	0	9.579	5.52017	2	12	2	1	471	53.1	6.23	High	High	High	Peak Found	Peak Found	Peak Found		0.157	0.086	0.038	172.8	184.2	192.7	27.2	15.8	7.3	0.166	0	10.11	2	125	2
FALSE	High	IsMasterProtein	A0A024QZM9	Plasminogen activator, urokinase, isoform CRA_a OS=Homo sapiens GN=PLAU PE=3 SV=1	0	9.523	9.51276	3	13	3	1	431	48.5	8.41	Peak Found	Not Found	Peak Found	High	High	High		22.809	100	35.241	8.4		5.5	191.6	200	194.5	0.304	0	10.7	3	137	2
FALSE	High	IsMasterProtein	ch03u_P19827	Inter-alpha-trypsin inhibitor heavy chain H1 OS=Homo sapiens GN=ITIH1 PE=1 SV=3	0	9.51	2.74424	2	7	2	1	911	101.3	6.79	High	High	High	Not Found	Not Found	Not Found		0.01	0.01	0.01	200	200	200				0.061	0	8.67	1	165	2
FALSE	High	IsMasterProtein	B3KW79	Carboxypeptidase OS=Homo sapiens PE=2 SV=1	0	9.417	7.77311	3	10	3	1	476	54.1	5.6	Not Found	Peak Found	Peak Found	High	High	High		100	26.15	43.544		7.4	4.5	200	192.6	195.5	0.304	0	10.78	3	94	3
FALSE	High	IsMasterProtein	ch02u_Q16769	Glutaminyl-peptide cyclotransferase OS=Homo sapiens GN=QPCT PE=1 SV=1	0	9.326	6.92521	2	18	2	1	361	40.9	6.61	Not Found	Peak Found	Peak Found	High	High	High		100	14.565	14.106		12.8	13.2	200	187.2	186.8	0.274	0	20.7	2	230	2
FALSE	High	IsMasterProtein	P12004	Proliferating cell nuclear antigen OS=Homo sapiens GN=PCNA PE=1 SV=1	0	9.316	14.9425	3	9	3	1	261	28.8	4.69	High	High	High	High	Peak Found	Peak Found		0.499	0.204	0.305	133.4	166.1	153.3	66.6	33.9	46.7	0.438	0	5.29	3	124	3
FALSE	High	IsMasterProtein	B2R7D2	cDNA, FLJ93389, highly similar to Homo sapiens multiple inositol polyphosphate histidine phosphatase, 1 (MINPP1), mRNA OS=Homo sapiens PE=2 SV=1	0	9.307	2.25873	1	14	1	1	487	55.1	7.97	High	High	Peak Found	High	High	High		0.629	0.579	0.62	122.8	126.7	123.4	77.2	73.3	76.6	0.179	0	15.66	1	168	1
FALSE	High	IsMasterProtein	B2RD51	Proteasome assembly chaperone 1 OS=Homo sapiens PE=2 SV=1	0	9.26	8.33333	2	7	2	1	288	32.9	7.17	High	High	High	Peak Found	Not Found	High	Acetyl [N-Term]	0.077		0.106	185.8		180.8	14.2		19.2	0.501	0	1.89	1	107	2
FALSE	High	IsMasterProtein	ch08u_Q7Z5G4	Golgin subfamily A member 7 OS=Homo sapiens GN=GOLGA7 PE=1 SV=2	0	9.248	16.0584	2	14	2	1	137	15.8	7.05	High	High	High	Peak Found	High	Peak Found		0.411	0.498	0.444	141.7	133.5	138.5	58.3	66.5	61.5	0.874	0	5.82	2	101	2
FALSE	High	IsMasterProtein	ch09i_P98155	Very low-density lipoprotein receptor OS=Homo sapiens GN=VLDLR PE=1 SV=1	0	9.244	4.12371	3	12	3	1	873	96	4.79	High	High	High	Peak Found	Peak Found	High		1.134	0.551	1.895	93.7	128.9	69.1	106.3	71.1	130.9	0.207	0	9.6	3	69	3
FALSE	High	IsMasterProtein	ch19i_P13639	Elongation factor 2 OS=Homo sapiens GN=EEF2 PE=1 SV=4	0	9.19	2.91375	2	12	2	1	858	95.3	6.83	High	High	High	Not Found	Not Found	Not Found		0.01		0.01	200		200				0.089	0	11.2	2	106	2
FALSE	High	IsMasterProtein	Q7L9L4-2	Isoform 2 of MOB kinase activator 1B OS=Homo sapiens GN=MOB1B	0	9.101	4.97738	1	12	1	1	221	25.5	6.15	High	Not Found	Not Found	High	Not Found	Not Found		1.68			74.6			125.4			0.585	0	10.01	1	117	1
FALSE	High	IsMasterProtein	A8K486	Peptidyl-prolyl cis-trans isomerase OS=Homo sapiens PE=2 SV=1	0	8.948	23.6364	3	6	3	1	165	18	6.9	High	Not Found	High	Peak Found	Not Found	Not Found		0.203			166.2			33.8			0.585	0	2.18	3	52	3
FALSE	High	IsMasterProtein	ch16u_Q9H773	dCTP pyrophosphatase 1 OS=Homo sapiens GN=DCTPP1 PE=1 SV=1	0	8.933	20	2	9	2	1	170	18.7	5.03	High	High	High	Not Found	Peak Found	Peak Found	Acetyl [N-Term]	0.01	0.101	0.096	200	181.7	182.4		18.3	17.6	0.52	0	5.3	1	158	2
FALSE	High	IsMasterProtein	P18085	ADP-ribosylation factor 4 OS=Homo sapiens GN=ARF4 PE=1 SV=3	0	8.919	11.6667	2	7	1	1	180	20.5	7.14	Not Found	High	Not Found	Not Found	High	Not Found			0.233			162.3			37.7		0.701	0	4.06	2	88	2
FALSE	High	IsMasterProtein	D9ZGG2	Vitronectin OS=Homo sapiens GN=VTN PE=4 SV=1	0	8.883	3.13808	1	19	1	1	478	54.3	5.8	High	High	High	Peak Found	Peak Found	Peak Found		0.032	0.031	0.028	193.8	193.9	194.6	6.2	6.1	5.4	0.105	0	20.37	1	324	1
FALSE	High	IsMasterProtein	B4DPD5	Ubiquitin thioesterase OS=Homo sapiens PE=2 SV=1	0	8.798	8.11688	2	10	2	1	308	35.2	5.59	High	High	High	Peak Found	Not Found	Not Found		0.129	0.01	0.01	177.1	200	200	22.9			0.311	0	6.17	2	113	2
FALSE	High	IsMasterProtein	A0A161I202	Lactoferrin OS=Homo sapiens GN=LTF PE=2 SV=1	0	8.79	6.18847	4	43	4	1	711	78.3	8.18	High	High	High	Peak Found	Peak Found	Peak Found		0.01	0.01	0.01	198.1	198	199.8	1.9	2	0.2	0.212	0	27.13	3	290	3
FALSE	High	IsMasterProtein	ch21u_O00764	Pyridoxal kinase OS=Homo sapiens GN=PDXK PE=1 SV=1	0	8.635	5.44872	1	2	1	1	312	35.1	6.13	Not Found	Not Found	High	Not Found	Not Found	Peak Found				0.759			113.7			86.3	0.122	0	2.84	1	88	1
FALSE	High	IsMasterProtein	ch09u_P23468	Receptor-type tyrosine-protein phosphatase delta OS=Homo sapiens GN=PTPRD PE=1 SV=2	0	8.618	1.20293	2	10	1	1	1912	214.6	6.57	Peak Found	Peak Found	Not Found	High	High	Not Found		4.396	4.033		37.1	39.7		162.9	160.3		0.042	0	8.6	2	90	2
FALSE	High	IsMasterProtein	ch05u_P06748	Nucleophosmin OS=Homo sapiens GN=NPM1 PE=1 SV=2	0	8.616	7.14286	2	9	2	1	294	32.6	4.78	High	Not Found	High	Not Found	Not Found	Not Found		0.01		0.01	200		200				0.468	0	10.01	2	26	2
FALSE	High	IsMasterProtein	ch17u_Q9HB40	Retinoid-inducible serine carboxypeptidase OS=Homo sapiens GN=SCPEP1 PE=1 SV=1	0	8.466	8.18584	3	12	3	1	452	50.8	5.81	High	Peak Found	Not Found	High	High	Not Found		0.671	6.91		119.7	25.3		80.3	174.7		0.35	0	6.26	3	96	3
FALSE	High	IsMasterProtein	ch06i_Q99715	Collagen alpha-1(XII) chain OS=Homo sapiens GN=COL12A1 PE=1 SV=2	0	8.461	1.01208	2	4	2	1	3063	332.9	5.53	Not Found	Not Found	Not Found	Not Found	High	Not Found			100						200		0.028	0	4.52	2	64	2
FALSE	High	IsMasterProtein	Q12765-2	Isoform 2 of Secernin-1 OS=Homo sapiens GN=SCRN1	0	8.411	3.91705	1	6	1	1	434	48.7	4.78	High	Not Found	High	Peak Found	Not Found	High		0.522		0.499	131.4		133.4	68.6		66.6	0.194	0	7.03	1	101	1
FALSE	High	IsMasterProtein	B5MD23	Tetraspanin OS=Homo sapiens GN=TSPAN9 PE=1 SV=1	0	8.402	5.53506	1	8	1	1	271	29.5	7.71	High	High	High	Peak Found	Peak Found	High		1.322	0.951	0.709	86.1	102.5	117	113.9	97.5	83	0.425	0	6.26	1	33	1
FALSE	High	IsMasterProtein	ch01u_P35268	60S ribosomal protein L22 OS=Homo sapiens GN=RPL22 PE=1 SV=2	0	8.39	19.5312	2	8	2	1	128	14.8	9.19	High	High	High	Peak Found	Peak Found	Peak Found		0.152	0.137	0.151	173.7	175.9	173.7	26.3	24.1	26.3	1.154	0	6.28	2	127	2
FALSE	High	IsMasterProtein	ch03i_P61225	Ras-related protein Rap-2b OS=Homo sapiens GN=RAP2B PE=1 SV=1	0	8.348	11.4754	2	10	2	1	183	20.5	4.81	High	Peak Found	Peak Found	High	High	High		0.498	0.531	0.523	133.5	130.6	131.3	66.5	69.4	68.7	0.874	0	8.31	2	66	2
FALSE	High	IsMasterProtein	ch19u_P48556	26S proteasome non-ATPase regulatory subunit 8 OS=Homo sapiens GN=PSMD8 PE=1 SV=2	0	8.321	5.14286	2	14	2	1	350	39.6	9.7	High	High	High	High	High	High		0.197	0.133	0.175	167	176.6	170.3	33	23.4	29.7	0.334	0	3.93	2	103	2
FALSE	High	IsMasterProtein	B3KM35	cDNA FLJ10144 fis, clone HEMBA1003286, highly similar to Beta-1,4-galactosyltransferase 4 (EC 2.4.1.-) OS=Homo sapiens PE=2 SV=1	0	8.311	5.23256	1	6	1	1	344	40	9.07	Peak Found	Peak Found	Peak Found	High	High	High		5.203	8.533	5.998	32.2	21	28.6	167.8	179	171.4	0.101	0	12.08	1	143	1
FALSE	High	IsMasterProtein	B4DLJ3	cDNA FLJ51495, highly similar to ADP-ribosylation factor 5 OS=Homo sapiens PE=2 SV=1	0	8.274	9.17031	2	10	1	1	229	25.4	7.66	High	High	High	Not Found	Not Found	Not Found			0.078	0.138		185.4	175.8		14.6	24.2	0.425	1	11.15	2	200	2
FALSE	High	IsMasterProtein	ch11u_Q7L2H7	Eukaryotic translation initiation factor 3 subunit M OS=Homo sapiens GN=EIF3M PE=1 SV=1	0	8.196	7.75401	2	3	2	1	374	42.5	5.63	Not Found	High	High	Not Found	Not Found	Not Found	Acetyl [N-Term]		0.01	0.01		200	200				0.222	0	2.21	1	48	2
FALSE	High	IsMasterProtein	ch19u_M0R0R2	40S ribosomal protein S5 OS=Homo sapiens GN=RPS5 PE=1 SV=1	0	8.163	10.2222	2	10	2	1	225	25.3	9.76	High	High	High	Not Found	Not Found	Peak Found			0.01	0.127		200	177.5			22.5	0.468	0	9.36	2	140	2
FALSE	High	IsMasterProtein	A8K7D9	Importin subunit alpha OS=Homo sapiens PE=2 SV=1	0	8.05	7.18336	2	4	2	1	529	57.8	5.4	Not Found	High	Not Found	Not Found	Peak Found	Not Found			0.479			135.2			64.8		0.172	0	4.88	2	65	2
FALSE	High	IsMasterProtein	O76061	Stanniocalcin-2 OS=Homo sapiens GN=STC2 PE=1 SV=1	0	8.006	5.62914	1	6	1	1	302	33.2	7.3	Not Found	Not Found	Not Found	High	High	High		100	100	100				200	200	200	0.166	0	10.59	1	175	1
FALSE	High	IsMasterProtein	ch11i_P42785-2	Isoform 2 of Lysosomal Pro-X carboxypeptidase OS=Homo sapiens GN=PRCP	0	7.986	3.67505	1	4	1	1	517	58.1	7.4	Peak Found	Not Found	Not Found	High	High	Not Found		23.741	100		8.1			191.9	200		0.101	0	7.66	1	100	1
FALSE	High	IsMasterProtein	ch06i_Q99808-2	Isoform 2 of Equilibrative nucleoside transporter 1 OS=Homo sapiens GN=SLC29A1	0	7.943	2.80374	1	6	1	1	535	58.9	8.15	High	Not Found	High	Peak Found	Not Found	Peak Found		0.241		0.328	161.2		150.6	38.8		49.4	0.101	0	5.7	1	105	1
FALSE	High	IsMasterProtein	ch01u_Q9UHV9	Prefoldin subunit 2 OS=Homo sapiens GN=PFDN2 PE=1 SV=1	0	7.877	9.09091	1	8	1	1	154	16.6	6.58	High	High	High	Peak Found	High	Peak Found		0.401	0.386	0.448	142.7	144.3	138.1	57.3	55.7	61.9	0.468	0	3.9	1	132	1
FALSE	High	IsMasterProtein	ch18i_Q969U7	Proteasome assembly chaperone 2 OS=Homo sapiens GN=PSMG2 PE=1 SV=1	0	7.636	4.54545	1	6	1	1	264	29.4	6.98	High	High	High	Peak Found	Peak Found	Peak Found		0.153	0.161	0.151	173.5	172.2	173.8	26.5	27.8	26.2	0.145	0	8.62	1	97	1
FALSE	High	IsMasterProtein	B4DWA6	cDNA FLJ60094, highly similar to F-actin capping protein subunit beta OS=Homo sapiens PE=2 SV=1	0	7.636	7.16418	2	12	2	1	335	37.5	6.14	High	High	High	Peak Found	Peak Found	Peak Found		0.194	0.126	0.101	167.5	177.7	181.6	32.5	22.3	18.4	0.233	0	8.2	2	82	2
FALSE	High	IsMasterProtein	ch05i_P10915	Hyaluronan and proteoglycan link protein 1 OS=Homo sapiens GN=HAPLN1 PE=2 SV=2	0	7.566	6.21469	2	12	1	1	354	40.1	7.42	Peak Found	High	High	High	High	High			0.01	0.01		200	200				0.222	0	13.17	2	214	2
FALSE	High	IsMasterProtein	Q6ZUY8	Lipase OS=Homo sapiens PE=2 SV=1	0	7.563	6.73317	2	13	2	1	401	45.4	7.11	Peak Found	Peak Found	Peak Found	High	High	High		9.325	8.383	20.315	19.4	21.3	9.4	180.6	178.7	190.6	0.274	0	11.54	2	120	2
FALSE	High	IsMasterProtein	ch01u_Q9GZM7	Tubulointerstitial nephritis antigen-like OS=Homo sapiens GN=TINAGL1 PE=1 SV=1	0	7.554	5.35332	2	10	2	1	467	52.4	6.99	Not Found	Peak Found	Peak Found	High	High	High			10.63	15.706		17.2	12		182.8	188	0.212	0	8.62	2	46	2
FALSE	High	IsMasterProtein	A0A024R718	Pre-B-cell colony enhancing factor 1, isoform CRA_a OS=Homo sapiens GN=PBEF1 PE=4 SV=1	0	7.478	6.10998	2	10	2	1	491	55.5	7.15	High	High	High	Not Found	Peak Found	Peak Found		0.01	0.11	0.125	200	180.2	177.8		19.8	22.2	0.166	0	13.29	2	59	2
FALSE	High	IsMasterProtein	Q9C0H2-4	Isoform 4 of Protein tweety homolog 3 OS=Homo sapiens GN=TTYH3	0	7.464	2.6616	1	2	1	1	526	57.9	5.31	Not Found	Not Found	Not Found	High	Not Found	Not Found		100						200			0.11	0	2.07	1	62	1
FALSE	High	IsMasterProtein	ch01u_P62241	40S ribosomal protein S8 OS=Homo sapiens GN=RPS8 PE=1 SV=2	0	7.441	6.25	1	2	1	1	208	24.2	10.32	Not Found	Not Found	High	Not Found	Not Found	Not Found											0.259	0	2.72	1	70	1
FALSE	High	IsMasterProtein	Q8NBS9	Thioredoxin domain-containing protein 5 OS=Homo sapiens GN=TXNDC5 PE=1 SV=2	0	7.425	3.7037	1	6	1	1	432	47.6	5.97	High	High	High	Peak Found	Not Found	Peak Found		0.086	0.01	0.114	184.2	200	179.5	15.8		20.5	0.089	0	8.71	1	152	1
FALSE	High	IsMasterProtein	Q05D08	PA2G4 protein (Fragment) OS=Homo sapiens GN=PA2G4 PE=2 SV=1	0	7.344	6.89655	2	8	2	1	406	45.1	8.95	High	High	High	Not Found	Not Found	Not Found				0.01			200				0.186	0	8.34	2	59	2
FALSE	High	IsMasterProtein	B2R7P8	cDNA, FLJ93545, highly similar to Homo sapiens 5-aminoimidazole-4-carboxamide ribonucleotide formyltransferase/IMP cyclohydrolase (ATIC), mRNA OS=Homo sapiens PE=2 SV=1	0	7.342	4.72973	2	4	2	1	592	64.6	6.8	Not Found	High	High	Not Found	Peak Found	Not Found			0.715			116.6			83.4		0.129	0	4.77	2	44	2
FALSE	High	IsMasterProtein	ch14u_O43405	Cochlin OS=Homo sapiens GN=COCH PE=1 SV=1	0	7.324	4.18182	2	8	2	1	550	59.4	7.96	Peak Found	Not Found	Not Found	High	High	High		30.178		100	6.4			193.6		200	0.155	0	8.28	2	146	2
FALSE	High	IsMasterProtein	Q5JR05	Rho-related GTP-binding protein RhoC OS=Homo sapiens GN=RHOC PE=4 SV=1	0	7.307	13.0653	2	10	2	1	199	22	7.91	High	High	High	Peak Found	Not Found	Not Found		0.532			130.5			69.5			0.468	0	6.18	2	80	2
FALSE	High	IsMasterProtein	Q9BXJ4-3	Isoform 3 of Complement C1q tumor necrosis factor-related protein 3 OS=Homo sapiens GN=C1QTNF3	0	7.219	3.1348	2	19	2	1	319	35.2	7.17	High	High	High	Not Found	Not Found	Not Found		0.01	0.01	0.01	200	200	200				0.638	0	15.43	2	149	2
FALSE	High	IsMasterProtein	ch09u_Q9NZZ3	Charged multivesicular body protein 5 OS=Homo sapiens GN=CHMP5 PE=1 SV=1	0	7.135	11.8721	2	13	2	1	219	24.6	4.83	High	High	High	High	Peak Found	High		0.793	0.91	0.851	111.6	104.7	108	88.4	95.3	92	1.371	0	3.77	2	89	2
FALSE	High	IsMasterProtein	ch22u_P09382	Galectin-1 OS=Homo sapiens GN=LGALS1 PE=1 SV=2	0	7.131	14.8148	2	12	2	1	135	14.7	5.5	High	High	High	Peak Found	Peak Found	Peak Found		0.136	0.136	0.17	176	176.1	170.9	24	23.9	29.1	0.668	0	2.5	2	80	2
FALSE	High	IsMasterProtein	P35270	Sepiapterin reductase OS=Homo sapiens GN=SPR PE=1 SV=1	0	7.092	5.74713	1	4	1	1	261	28	8.05	Not Found	High	High	Not Found	Peak Found	Not Found			0.223	0.01		163.5	200		36.5		0.136	0	4.73	1	105	1
FALSE	High	IsMasterProtein	A0A140VJW5	Testicular tissue protein Li 192 OS=Homo sapiens PE=2 SV=1	0	7.073	5.78842	2	6	2	1	501	57.1	6.55	Not Found	High	High	Not Found	Not Found	Not Found			0.01	0.01		200	200				0.122	0	7.45	2	57	2
FALSE	High	IsMasterProtein	ch03u_Q13740	CD166 antigen OS=Homo sapiens GN=ALCAM PE=1 SV=2	0	7.025	4.28816	2	12	2	1	583	65.1	6.25	High	High	High	Peak Found	Peak Found	Peak Found		0.45	0.394	0.481	137.9	143.4	135.1	62.1	56.6	64.9	0.155	0	6.99	2	45	2
FALSE	High	IsMasterProtein	P05109	Protein S100-A8 OS=Homo sapiens GN=S100A8 PE=1 SV=1	0	7.021	23.6559	2	8	2	1	93	10.8	7.03	High	High	High	Not Found	Not Found	Not Found		0.01	0.01		200	200					0.778	0	3.95	2	103	2
FALSE	High	IsMasterProtein	ch14i_A0A087X1Z3	Proteasome activator complex subunit 2 OS=Homo sapiens GN=PSME2 PE=1 SV=1	0	6.992	16.1417	3	12	3	1	254	29.1	6.71	High	High	High	Peak Found	Peak Found	Peak Found		0.3	0.667	0.609	153.8	120	124.3	46.2	80	75.7	0.585	0	4.09	3	30	3
FALSE	High	IsMasterProtein	D6R956	Ubiquitin carboxyl-terminal hydrolase OS=Homo sapiens GN=UCHL1 PE=1 SV=1	0	6.983	5.39419	1	6	1	1	241	26.8	5.81	Peak Found	High	High	High	Not Found	Peak Found		0.162		0.135	172.1		176.2	27.9		23.8	0.334	0	6.85	1	43	1
FALSE	High	IsMasterProtein	ch01i_P50897	Palmitoyl-protein thioesterase 1 OS=Homo sapiens GN=PPT1 PE=1 SV=1	0	6.957	4.90196	1	6	1	1	306	34.2	6.52	Not Found	Not Found	Not Found	High	High	High		100	100	100				200	200	200	0.166	0	8.05	1	119	1
FALSE	High	IsMasterProtein	P42830	C-X-C motif chemokine 5 OS=Homo sapiens GN=CXCL5 PE=1 SV=1	0	6.926	29.8246	3	12	3	1	114	12	8.88	Peak Found	Peak Found	Peak Found	High	High	High		13.643	10.013	8.737	13.7	18.2	20.5	186.3	181.8	179.5	1.683	0	1.87	3	54	3
FALSE	High	IsMasterProtein	B3KM36	cDNA FLJ10153 fis, clone HEMBA1003417, highly similar to BAG family molecular chaperone regulator 2 OS=Homo sapiens PE=2 SV=1	0	6.919	14.6919	2	8	2	1	211	23.7	6.7	High	High	High	Not Found	Not Found	Not Found		0.01			200						0.334	0	6.55	2	50	2
FALSE	High	IsMasterProtein	P19338	Nucleolin OS=Homo sapiens GN=NCL PE=1 SV=3	0	6.905	2.39437	1	2	1	1	710	76.6	4.7	Not Found	High	Not Found	Not Found	Not Found	Not Found											0.049	0	3.22	1	78	1
FALSE	High	IsMasterProtein	B7Z8W8	Reticulon OS=Homo sapiens PE=2 SV=1	0	6.861	1.25969	2	8	2	1	1032	112.5	4.96	High	High	High	Not Found	Not Found	Not Found		0.01		0.01	200		200				0.093	0	6.7	2	88	2
FALSE	High	IsMasterProtein	D3DNI3	Profilin (Fragment) OS=Homo sapiens GN=PFN2 PE=3 SV=1	0	6.858	4.11765	1	4	1	1	340	35.5	10.2	Not Found	High	High	Not Found	Not Found	Peak Found				0.125			177.8			22.2	0.116	0	4.71	1	121	1
FALSE	High	IsMasterProtein	ch13u_P02462	Collagen alpha-1(IV) chain OS=Homo sapiens GN=COL4A1 PE=1 SV=3	0	6.81	0.958658	1	10	1	1	1669	160.5	8.28	High	Peak Found	High	High	High	High		1.619	1.441	1.794	76.4	81.9	71.6	123.6	118.1	128.4	0.054	0	15.32	1	74	1
FALSE	High	IsMasterProtein	ch22u_Q9NYQ6	Cadherin EGF LAG seven-pass G-type receptor 1 OS=Homo sapiens GN=CELSR1 PE=1 SV=1	0	6.801	0.564035	1	4	1	1	3014	329.3	5.92	Not Found	Not Found	Not Found	High	High	Not Found		100	100					200	200		0.015	0	6.43	1	131	1
FALSE	High	IsMasterProtein	D3DRP5	Chromosome 9 open reading frame 19, isoform CRA_a (Fragment) OS=Homo sapiens GN=C9orf19 PE=4 SV=1	0	6.799	3.7037	1	2	1	1	351	37.8	10.84	Not Found	Not Found	Not Found	Not Found	Not Found	Not Found											0.093	0	2.8	1	79	1
FALSE	High	IsMasterProtein	Q8TDJ5	Tyrosine-protein kinase receptor OS=Homo sapiens GN=TFG/ALK fusion PE=2 SV=1	0	6.793	1.4944	2	14	2	1	803	88.6	6.33	High	High	High	High	High	Peak Found		0.024	0.023	0.025	195.3	195.5	195.1	4.7	4.5	4.9	0.166	0	7.06	2	56	2
FALSE	High	IsMasterProtein	ch22u_P30566	Adenylosuccinate lyase OS=Homo sapiens GN=ADSL PE=1 SV=2	0	6.75	4.13223	2	12	2	1	484	54.9	7.11	High	High	High	Not Found	Peak Found	Not Found		0.01	0.022	0.01	200	195.7	200		4.3		0.16	0	9.04	2	132	2
FALSE	High	IsMasterProtein	ch01i_Q13310-3	Isoform 3 of Polyadenylate-binding protein 4 OS=Homo sapiens GN=PABPC4	0	6.73	2.42424	1	2	1	1	660	72.3	9.35	Not Found	Not Found	Not Found	Not Found	Not Found	Not Found											0.056	0	2.18	1	53	1
FALSE	High	IsMasterProtein	ch18i_Q02413	Desmoglein-1 OS=Homo sapiens GN=DSG1 PE=1 SV=2	0	6.69	1.52526	1	6	1	1	1049	113.7	5.03	High	High	High	Not Found	Not Found	Not Found		0.01	0.01	0.01	200	200	200				0.054	0	4.36	1	140	1
FALSE	High	IsMasterProtein	ch14i_Q8NDC0	MAPK-interacting and spindle-stabilizing protein-like OS=Homo sapiens GN=MAPK1IP1L PE=1 SV=4	0	6.687	6.93878	1	4	1	1	245	24.3	5.62	High	High	High	Peak Found	Peak Found	Peak Found	Acetyl [N-Term]	0.406	0.339	0.367	142.2	149.3	146.4	57.8	50.7	53.6	99	0			112	1
FALSE	High	IsMasterProtein	ch12u_B7Z6Z4	Myosin light polypeptide 6 OS=Homo sapiens GN=MYL6 PE=1 SV=1	0	6.643	11.7647	2	7	2	1	238	26.7	5.08	High	High	High	Peak Found	Peak Found	Peak Found		0.247	0.247	0.245	160.4	160.4	160.6	39.6	39.6	39.4	0.311	0	2.03	2	67	2
FALSE	High	IsMasterProtein	ch06i_Q03692	Collagen alpha-1(X) chain OS=Homo sapiens GN=COL10A1 PE=1 SV=2	0	6.623	1.91176	1	6	1	1	680	66.1	9.67	High	High	High	Not Found	Not Found	Not Found		0.01	0.01	0.01	200	200	200				0.066	0	6.55	1	129	1
FALSE	High	IsMasterProtein	ch18u_Q08554	Desmocollin-1 OS=Homo sapiens GN=DSC1 PE=1 SV=2	0	6.589	2.79642	2	10	2	1	894	99.9	5.43	High	High	High	Not Found	Not Found	Not Found		0.01	0.01	0.01	200	200	200				0.094	0	7.27	2	80	2
FALSE	High	IsMasterProtein	B2R6I6	cDNA, FLJ92965, highly similar to Homo sapiens stanniocalcin 1 (STC1), mRNA OS=Homo sapiens PE=2 SV=1	0	6.582	7.69231	1	2	1	1	247	27.6	7.99	Not Found	Not Found	Not Found	Not Found	High	Not Found											0.145	0	3.49	1	44	1
FALSE	High	IsMasterProtein	A0A140VK72	Testis secretory sperm-binding protein Li 199a OS=Homo sapiens PE=2 SV=1	0	6.547	7.21868	3	8	3	1	471	51.9	5.76	Peak Found	Not Found	Peak Found	High	Not Found	High		8.323		7.323	21.5		24	178.5		176	0.304	0	0	3	0	3
FALSE	High	IsMasterProtein	Q59GM9	Alpha-1,4 glucan phosphorylase (Fragment) OS=Homo sapiens PE=2 SV=1	0	6.531	1.6185	1	4	1	1	865	98.8	6.96	Not Found	High	High	Not Found	Not Found	Not Found			0.01			200					0.041	0	6.06	1	100	1
FALSE	High	IsMasterProtein	A0A024QZL1	Proteoglycan 1, secretory granule, isoform CRA_a OS=Homo sapiens GN=PRG1 PE=4 SV=1	0	6.528	12.6582	1	6	1	1	158	17.6	4.86	Not Found	Not Found	Not Found	Not Found	Not Found	Not Found											0.468	0	6.85	1	49	1
FALSE	High	IsMasterProtein	ch02i_O00487	26S proteasome non-ATPase regulatory subunit 14 OS=Homo sapiens GN=PSMD14 PE=1 SV=1	0	6.492	7.09677	3	12	3	1	310	34.6	6.52	High	High	High	Not Found	Peak Found	Peak Found		0.01	0.141	0.119	200	175.3	178.7		24.7	21.3	0.468	0	12.08	3	58	3
FALSE	High	IsMasterProtein	ch12i_O14910	Protein lin-7 homolog A OS=Homo sapiens GN=LIN7A PE=1 SV=2	0	6.483	6.86695	1	4	1	1	233	26	8.72	High	High	Not Found	Peak Found	Peak Found	Not Found		0.214	0.107		164.7	180.6		35.3	19.4		0.179	0	6.01	1	80	1
FALSE	High	IsMasterProtein	Q59EL2	COP9 constitutive photomorphogenic homolog subunit 2 variant (Fragment) OS=Homo sapiens PE=2 SV=1	0	6.475	3.10421	1	4	1	1	451	52.5	5.54	High	High	Not Found	Not Found	Not Found	Not Found			0.01			200					0.089	0	5.89	1	57	1
FALSE	High	IsMasterProtein	ch20u_Q13404	Ubiquitin-conjugating enzyme E2 variant 1 OS=Homo sapiens GN=UBE2V1 PE=1 SV=2	0	6.412	14.966	2	7	2	1	147	16.5	7.93	Not Found	High	High	Not Found	Peak Found	Peak Found	Acetyl [N-Term]		0.155	0.228		173.2	162.8		26.8	37.2	0.468	0	1.66	1	49	2
FALSE	High	IsMasterProtein	ch21i_P50990	T-complex protein 1 subunit theta OS=Homo sapiens GN=CCT8 PE=1 SV=4	0	6.409	2.73723	1	6	1	1	548	59.6	5.6	High	High	High	Peak Found	Peak Found	Peak Found		0.06	0.105	0.094	188.7	181.1	182.9	11.3	18.9	17.1	0.058	0	8.46	1	101	1
FALSE	High	IsMasterProtein	ch16i_P07741	Adenine phosphoribosyltransferase OS=Homo sapiens GN=APRT PE=1 SV=2	0	6.333	6.11111	1	2	1	1	180	19.6	6.02	High	Not Found	High	Not Found	Not Found	Not Found	Acetyl [N-Term]			0.01			200				0.179	0			83	1
FALSE	High	IsMasterProtein	A8K3H8	cDNA FLJ77680, highly similar to Homo sapiens protein phosphatase 2 (formerly 2A), regulatory subunit A (PR 65), alpha isoform (PPP2R1A), mRNA OS=Homo sapiens PE=2 SV=1	0	6.321	3.39559	1	2	1	1	589	65.3	5.11	High	Not Found	Not Found	Peak Found	Not Found	Not Found		0.37			146			54			0.061	0	2.26	1	25	1
FALSE	High	IsMasterProtein	ch01i_Q9BTT0	Acidic leucine-rich nuclear phosphoprotein 32 family member E OS=Homo sapiens GN=ANP32E PE=1 SV=1	0	6.321	5.22388	2	4	2	1	268	30.7	3.85	Not Found	High	Not Found	Not Found	Not Found	Not Found											0.585	0	4.65	2	33	2
FALSE	High	IsMasterProtein	A0A024R3E3	Apolipoprotein A-I, isoform CRA_a OS=Homo sapiens GN=APOA1 PE=3 SV=1	0	6.255	5.99251	1	2	1	1	267	30.8	5.76	High	Not Found	Not Found	Not Found	Not Found	Not Found		0.01			200						0.116	0	2.08	1	42	1
FALSE	High	IsMasterProtein	A0A024R1D7	Galactose-3-O-sulfotransferase 1, isoform CRA_a OS=Homo sapiens GN=GAL3ST1 PE=4 SV=1	0	6.175	2.83688	1	6	1	1	423	48.7	8.62	Not Found	Not Found	Not Found	High	High	High		100	100	100				200	200	200	0.089	0	6.9	1	119	1
FALSE	High	IsMasterProtein	chXu_P05543	Thyroxine-binding globulin OS=Homo sapiens GN=SERPINA7 PE=1 SV=2	0	6.171	4.57831	2	28	2	1	415	46.3	6.3	High	High	High	Not Found	Not Found	Not Found		0.01	0.01	0.01	200	200	200				0.212	0	15.55	2	222	2
FALSE	High	IsMasterProtein	A8K651	cDNA FLJ75700, highly similar to Homo sapiens complement component 1, q subcomponent binding protein (C1QBP), nuclear gene encoding mitochondrial protein, mRNA OS=Homo sapiens PE=2 SV=1	0	6.165	4.60993	1	6	1	1	282	31.4	4.84	High	Not Found	High	Not Found	Not Found	Not Found		0.01		0.01	200		200				0.359	0	1.92	1	71	1
FALSE	High	IsMasterProtein	P31689	DnaJ homolog subfamily A member 1 OS=Homo sapiens GN=DNAJA1 PE=1 SV=2	0	6.147	3.27456	1	7	1	1	397	44.8	7.08	High	Peak Found	Peak Found	High	High	High		0.491	0.528	0.59	134.2	130.9	125.8	65.8	69.1	74.2	0.233	0	8.42	1	28	1
FALSE	High	IsMasterProtein	ch07i_Q03135-2	Isoform 2 of Caveolin-1 OS=Homo sapiens GN=CAV1	0	6.136	10.2041	1	3	1	1	147	17	5.49	High	High	High	Peak Found	Peak Found	Peak Found	Acetyl [N-Term]	0.141	0.161	0.172	175.3	172.3	170.7	24.7	27.7	29.3	0.259	0			78	1
FALSE	High	IsMasterProtein	O00743-3	Isoform 3 of Serine/threonine-protein phosphatase 6 catalytic subunit OS=Homo sapiens GN=PPP6C	0	6.103	3.80117	1	1	1	1	342	38.9	6.18	High	Not Found	Not Found	Not Found	Not Found	Not Found		0.01			200						0.11	0			54	1
FALSE	High	IsMasterProtein	ch05u_P12081	Histidine--tRNA ligase, cytoplasmic OS=Homo sapiens GN=HARS PE=1 SV=2	0	6.031	4.3222	2	8	2	1	509	57.4	5.88	High	High	High	Not Found	Not Found	Not Found				0.01			200				0.141	0	9.23	2	90	2
FALSE	High	IsMasterProtein	O00410-3	Isoform 3 of Importin-5 OS=Homo sapiens GN=IPO5	0	6.008	1.79372	1	2	1	1	1115	125.5	4.92	Not Found	Not Found	Not Found	Not Found	Not Found	Not Found											0.038	0	3	1	42	1
FALSE	High	IsMasterProtein	ch11i_Q93063-3	Isoform 3 of Exostosin-2 OS=Homo sapiens GN=EXT2	0	5.978	2.26365	1	2	1	1	751	85.8	6.32	Not Found	Not Found	Peak Found	Not Found	Not Found	High				1.725			73.4			126.6	0.049	0	2.87	1	42	1
FALSE	High	IsMasterProtein	ch10u_P15169	Carboxypeptidase N catalytic chain OS=Homo sapiens GN=CPN1 PE=1 SV=1	0	5.972	3.27511	1	6	1	1	458	52.3	7.34	High	High	High	Not Found	Not Found	Not Found		0.01	0.01	0.01	200	200	200				0.096	0	9.66	1	47	1
FALSE	High	IsMasterProtein	ch17i_Q07955-2	Isoform ASF-2 of Serine/arginine-rich splicing factor 1 OS=Homo sapiens GN=SRSF1	0	5.926	4.10959	1	2	1	1	292	32	5.91	High	Not Found	Not Found	Not Found	Not Found	Not Found		0.01			200						0.145	0	2.35	1	62	1
FALSE	High	IsMasterProtein	P06730-2	Isoform 2 of Eukaryotic translation initiation factor 4E OS=Homo sapiens GN=EIF4E	0	5.887	5.64516	1	4	1	1	248	28.8	6.42	High	High	Not Found	Not Found	Not Found	Not Found		0.01			200						0.145	0	4.84	1	63	1
FALSE	High	IsMasterProtein	ch12i_O75390	Citrate synthase, mitochondrial OS=Homo sapiens GN=CS PE=1 SV=2	0	5.861	4.72103	2	4	2	1	466	51.7	8.32	Not Found	Not Found	High	Not Found	Not Found	Not Found				0.01			200				0.222	0	4.25	2	25	2
FALSE	High	IsMasterProtein	B2R4D5	Actin-related protein 2/3 complex subunit 3 OS=Homo sapiens PE=2 SV=1	0	5.827	10.1124	2	16	2	1	178	20.5	8.59	High	High	High	High	High	High		0.295	0.316	0.297	154.4	152	154.2	45.6	48	45.8	1.154	0	1.65	2	110	2
FALSE	High	IsMasterProtein	ch12u_Q96A72	Protein mago nashi homolog 2 OS=Homo sapiens GN=MAGOHB PE=1 SV=1	0	5.767	13.5135	2	8	2	1	148	17.3	6.39	High	High	High	Peak Found	Peak Found	Peak Found	Acetyl [N-Term]	0.163	0.142	0.165	172	175.1	171.7	28	24.9	28.3	0.389	0	4.67	1	53	2
FALSE	High	IsMasterProtein	ch09i_P02760	Protein AMBP OS=Homo sapiens GN=AMBP PE=1 SV=1	0	5.761	5.68182	2	8	2	1	352	39	6.25	Not Found	Not Found	Not Found	High	High	High		100	100					200	200		0.292	0	5.75	2	68	2
FALSE	High	IsMasterProtein	ch02i_P13010	X-ray repair cross-complementing protein 5 OS=Homo sapiens GN=XRCC5 PE=1 SV=3	0	5.76	3.00546	1	4	1	1	732	82.7	5.81	High	Not Found	High	Not Found	Not Found	Not Found				0.01			200				0.053	0	7.23	1	28	1
FALSE	High	IsMasterProtein	ch10u_A6NFX8	ADP-sugar pyrophosphatase OS=Homo sapiens GN=NUDT5 PE=1 SV=1	0	5.758	6.46552	1	2	1	1	232	25.9	5.19	Not Found	High	Not Found	Not Found	Not Found	Not Found			0.01			200					0.194	0	2.2	1	62	1
FALSE	High	IsMasterProtein	A0A024R1X8	Junction plakoglobin, isoform CRA_a OS=Homo sapiens GN=JUP PE=4 SV=1	0	5.745	4.56376	3	10	3	1	745	81.7	6.14	High	Not Found	High	Not Found	Not Found	Not Found		0.01		0.01	200		200				0.17	0	3.92	3	50	3
FALSE	High	IsMasterProtein	A0A087WW66	26S proteasome non-ATPase regulatory subunit 1 OS=Homo sapiens GN=PSMD1 PE=1 SV=1	0	5.741	2.93809	2	4	2	1	953	105.8	5.41	Not Found	Not Found	High	Not Found	Not Found	Not Found				0.01			200				0.087	0	3.25	2	16	2
FALSE	High	IsMasterProtein	ch01u_A0A0A0MRJ7	Coagulation factor V OS=Homo sapiens GN=F5 PE=1 SV=1	0	5.724	0.583221	1	2	1	1	2229	252.1	6.05	Not Found	High	Not Found	Not Found	Not Found	Not Found			0.01			200					0.023	0	2.59	1	50	1
FALSE	High	IsMasterProtein	P02649	Apolipoprotein E OS=Homo sapiens GN=APOE PE=1 SV=1	0	5.721	8.20189	2	14	2	1	317	36.1	5.73	High	High	High	Not Found	Not Found	Not Found		0.01	0.01	0.01	200	200	200				0.202	0	11.08	2	159	2
FALSE	High	IsMasterProtein	Q9NPD3	Exosome complex component RRP41 OS=Homo sapiens GN=EXOSC4 PE=1 SV=3	0	5.716	4.89796	1	2	1	1	245	26.4	6.52	High	High	Not Found	Not Found	Not Found	Not Found	Acetyl [N-Term]										0.194	0			64	1
FALSE	High	IsMasterProtein	ch20i_P56537	Eukaryotic translation initiation factor 6 OS=Homo sapiens GN=EIF6 PE=1 SV=1	0	5.691	13.0612	2	8	2	1	245	26.6	4.68	High	High	High	Not Found	Not Found	Not Found		0.01			200						0.468	0	2.03	2	35	2
FALSE	High	IsMasterProtein	D3DV26	S100 calcium binding protein A10 (Annexin II ligand, calpactin I, light polypeptide (P11)), isoform CRA_b (Fragment) OS=Homo sapiens GN=S100A10 PE=4 SV=1	0	5.681	6.82927	2	6	2	1	205	22.3	10.33	High	High	Not Found	Not Found	Not Found	Not Found		0.01	0.01		200	200					0.425	0	2.21	2	49	2
FALSE	High	IsMasterProtein	A0A024R4N0	HCG1640809, isoform CRA_b OS=Homo sapiens GN=hCG_1640809 PE=4 SV=1	0	5.674	4.96894	2	17	2	1	322	35.3	8.15	High	High	High	High	High	High		0.263	0.325	0.28	158.4	151	156.2	41.6	49	43.8	0.874	0	10.9	2	115	2
FALSE	High	IsMasterProtein	ch17u_Q16853	Membrane primary amine oxidase OS=Homo sapiens GN=AOC3 PE=1 SV=3	0	5.657	2.09699	1	8	1	1	763	84.6	6.52	High	High	High	Not Found	Not Found	Not Found		0.01	0.01	0.01	200	200	200				0.062	0	13.06	1	134	1
FALSE	High	IsMasterProtein	ch04i_P22234-2	Isoform 2 of Multifunctional protein ADE2 OS=Homo sapiens GN=PAICS	0	5.601	6.48148	2	5	2	1	432	47.9	7.69	High	Not Found	Not Found	Not Found	Not Found	Not Found											0.179	0	4.24	2	24	2
FALSE	High	IsMasterProtein	chXu_O75832	26S proteasome non-ATPase regulatory subunit 10 OS=Homo sapiens GN=PSMD10 PE=1 SV=1	0	5.594	9.73451	1	4	1	1	226	24.4	6.1	Not Found	High	Not Found	Not Found	Not Found	Not Found			0.01			200					0.194	0	4.43	1	23	1
FALSE	High	IsMasterProtein	ch09i_P35030	Trypsin-3 OS=Homo sapiens GN=PRSS3 PE=1 SV=2	0	5.557	4.27632	1	14	1	1	304	32.5	7.49	High	High	High	Not Found	Not Found	Not Found		0.01	0.01	0.01	200	200	200				0.136	0	8.5	1	140	1
FALSE	High	IsMasterProtein	ch02u_B7Z4C8	60S ribosomal protein L31 OS=Homo sapiens GN=RPL31 PE=1 SV=1	0	5.52	6.92308	1	4	1	1	130	15.1	10.37	Peak Found	High	Not Found	High	Peak Found	Not Found		0.201	0.189		166.5	168.2		33.5	31.8		0.778	0	1.72	1	34	1
FALSE	High	IsMasterProtein	A0A024RDL9	Phosphoserine phosphatase, isoform CRA_b OS=Homo sapiens GN=PSPH PE=4 SV=1	0	5.508	5.55556	1	6	1	1	252	28.1	7.37	High	High	High	Peak Found	Peak Found	Peak Found		0.313	0.279	0.279	152.4	156.4	156.3	47.6	43.6	43.7	0.155	0	7.6	1	87	1
FALSE	High	IsMasterProtein	Q86YQ8	Copine-8 OS=Homo sapiens GN=CPNE8 PE=1 SV=2	0	5.479	4.07801	2	10	2	1	564	63.1	5.96	Peak Found	Peak Found	Peak Found	High	High	High		2.133	2.049	2.311	63.8	65.6	60.4	136.2	134.4	139.6	0.15	0	11.13	2	48	2
FALSE	High	IsMasterProtein	P62316	Small nuclear ribonucleoprotein Sm D2 OS=Homo sapiens GN=SNRPD2 PE=1 SV=1	0	5.47	8.47458	1	6	1	1	118	13.5	9.91	Not Found	High	High	Not Found	Peak Found	Not Found											0.668	0	3.64	1	47	1
FALSE	High	IsMasterProtein	ch06i_O75955	Flotillin-1 OS=Homo sapiens GN=FLOT1 PE=1 SV=3	0	5.467	6.08899	2	6	2	1	427	47.3	7.49	Not Found	Not Found	Not Found	Not Found	Not Found	Not Found											0.16	0	3.81	2	30	2
FALSE	High	IsMasterProtein	ch12u_P24592	Insulin-like growth factor-binding protein 6 OS=Homo sapiens GN=IGFBP6 PE=1 SV=1	0	5.452	5.41667	1	6	1	1	240	25.3	7.81	Not Found	Not Found	Not Found	High	High	High		100	100	100				200	200	200	0.194	0	7.97	1	45	1
FALSE	High	IsMasterProtein	ch01u_P05026	Sodium/potassium-transporting ATPase subunit beta-1 OS=Homo sapiens GN=ATP1B1 PE=1 SV=1	0	5.427	9.24092	2	9	2	1	303	35	8.53	High	High	High	Peak Found	Peak Found	Not Found		0.136	0.077		176	185.6		24	14.4		0.311	0	5.79	2	42	2
FALSE	High	IsMasterProtein	B4DR52	Histone H2B OS=Homo sapiens PE=2 SV=1	0	5.4	10.8434	2	11	2	1	166	18	10.32	High	High	High	Peak Found	Peak Found	Peak Found		0.11	0.111	0.11	180.2	180.1	180.3	19.8	19.9	19.7	0.359	0	0	2	73	2
FALSE	High	IsMasterProtein	P62745	Rho-related GTP-binding protein RhoB OS=Homo sapiens GN=RHOB PE=1 SV=1	0	5.38	6.12245	1	8	1	1	196	22.1	5.24	High	High	Not Found	High	High	Not Found		1.33	1.215		85.8	90.3		114.2	109.7		0.52	0	0	1	29	1
FALSE	High	IsMasterProtein	Q9H444	Charged multivesicular body protein 4b OS=Homo sapiens GN=CHMP4B PE=1 SV=1	0	5.338	6.25	1	4	1	1	224	24.9	4.82	High	High	Not Found	Peak Found	Peak Found	Not Found		0.792	0.657		111.6	120.7		88.4	79.3		0.179	0	5.21	1	80	1
FALSE	High	IsMasterProtein	E3WH17	Tyrosine-protein kinase receptor OS=Homo sapiens GN=SQSTM1-ALK PE=2 SV=1	0	5.321	1.35135	1	8	1	1	814	89.9	7.55	Peak Found	Peak Found	High	High	High	High		1.053	0.714	0.577	97.4	116.7	126.8	102.6	83.3	73.2	0.11	0	0	1	30	1
FALSE	High	IsMasterProtein	Q9NZ08-2	Isoform 2 of Endoplasmic reticulum aminopeptidase 1 OS=Homo sapiens GN=ERAP1	0	5.308	1.37131	1	6	1	1	948	107.8	6.28	High	High	High	Not Found	Peak Found	Not Found		0.01	0.153		200	173.5			26.5		0.042	0	6	1	68	1
FALSE	High	IsMasterProtein	B3KQS9	cDNA PSEC0141 fis, clone PLACE1005913, highly similar to Deoxyribonuclease-2-alpha (EC 3.1.22.1) OS=Homo sapiens PE=2 SV=1	0	5.289	6.94444	2	10	2	1	360	39.5	8.05	Not Found	Not Found	Not Found	High	Not Found	High		100		100				200		200	0.311	0	11.79	2	78	2
FALSE	High	IsMasterProtein	ch06i_Q9NP79	Vacuolar protein sorting-associated protein VTA1 homolog OS=Homo sapiens GN=VTA1 PE=1 SV=1	0	5.287	4.56026	1	4	1	1	307	33.9	6.29	High	High	High	Peak Found	Peak Found	Peak Found	Acetyl [N-Term]	0.308	0.328	0.309	152.9	150.6	152.8	47.1	49.4	47.2	0.425	0			84	1
FALSE	High	IsMasterProtein	ch07i_Q7L5N1	COP9 signalosome complex subunit 6 OS=Homo sapiens GN=COPS6 PE=1 SV=1	0	5.211	8.25688	3	8	3	1	327	36.1	5.73	High	High	Not Found	Not Found	Not Found	Not Found											0.585	0	5.7	3	13	3
FALSE	High	IsMasterProtein	ch10u_H0Y306	Histone-lysine N-methyltransferase SUV39H2 (Fragment) OS=Homo sapiens GN=SUV39H2 PE=1 SV=1	0	5.187	10.2273	4	5	4	1	176	20.1	5.95	High	Not Found	High	Not Found	Not Found	Not Found	Acetyl [N-Term]	0.01			200						0.52	0			18	4
FALSE	High	IsMasterProtein	B2R7M3	cDNA, FLJ93510, highly similar to Homo sapiens JTV1 gene (JTV1), mRNA OS=Homo sapiens PE=2 SV=1	0	5.183	4.0625	1	6	1	1	320	35.4	8.41	High	High	High	Not Found	Not Found	Not Found											0.116	0	6.63	1	66	1
FALSE	High	IsMasterProtein	ch01i_Q5T4S7-2	Isoform 2 of E3 ubiquitin-protein ligase UBR4 OS=Homo sapiens GN=UBR4	0	5.164	0.538048	1	2	1	1	5204	575.6	6.01	Not Found	Not Found	Not Found	Not Found	Not Found	Not Found											0.008	0	2.25	1	47	1
FALSE	High	IsMasterProtein	ch18u_Q96KP4	Cytosolic non-specific dipeptidase OS=Homo sapiens GN=CNDP2 PE=1 SV=2	0	5.121	3.57895	1	4	1	1	475	52.8	5.97	Not Found	High	High	Not Found	Not Found	Not Found			0.01	0.01		200	200				0.083	0	4.75	1	54	1
FALSE	High	IsMasterProtein	B2R6X2	Beta-glucuronidase OS=Homo sapiens PE=2 SV=1	0	5.108	2.61137	2	8	2	1	651	74.7	7.02	Not Found	High	High	Not Found	High	High			1.582	1.558		77.4	78.2		122.6	121.8	0.218	0	7.27	2	69	2
FALSE	High	IsMasterProtein	Q53FR4	Vacuolar protein sorting 35 variant (Fragment) OS=Homo sapiens PE=2 SV=1	0	5.004	1.75879	1	2	1	1	796	91.6	5.49	Not Found	Not Found	High	Not Found	Not Found	Peak Found				0.254			159.5			40.5	0.047	0	2.13	1	30	1
FALSE	High	IsMasterProtein	ch04u_O60701	UDP-glucose 6-dehydrogenase OS=Homo sapiens GN=UGDH PE=1 SV=1	0	4.98	3.84615	2	10	2	1	494	55	7.12	High	High	High	Not Found	Peak Found	Peak Found			0.155	0.148		173.2	174.3		26.8	25.7	0.15	0	3.87	2	37	2
FALSE	High	IsMasterProtein	ch11i_P46776	60S ribosomal protein L27a OS=Homo sapiens GN=RPL27A PE=1 SV=2	0	4.978	7.43243	1	6	1	1	148	16.6	11	High	High	High	Peak Found	Peak Found	Peak Found		0.156	0.101	0.15	173	181.7	174	27	18.3	26	0.334	0	6.8	1	118	1
FALSE	High	IsMasterProtein	ch17u_P08697	Alpha-2-antiplasmin OS=Homo sapiens GN=SERPINF2 PE=1 SV=3	0	4.946	2.24033	1	16	1	1	491	54.5	6.29	High	High	High	Not Found	Not Found	Not Found		0.01	0.01	0.01	200	200	200				0.101	0	18.63	1	185	1
FALSE	High	IsMasterProtein	ch19u_Q9NPH2	Inositol-3-phosphate synthase 1 OS=Homo sapiens GN=ISYNA1 PE=1 SV=1	0	4.945	2.86738	1	6	1	1	558	61	5.76	Not Found	High	High	Not Found	Peak Found	Not Found			0.265	0.01		158	200		42		0.096	0	3.91	1	71	1
FALSE	High	IsMasterProtein	ch15i_Q9BRR6	ADP-dependent glucokinase OS=Homo sapiens GN=ADPGK PE=1 SV=1	0	4.925	3.21932	1	2	1	1	497	54.1	6.2	Not Found	Not Found	Not Found	Not Found	Not Found	Not Found											0.11	0	1.71	1	53	1
FALSE	High	IsMasterProtein	ch03i_P01040	Cystatin-A OS=Homo sapiens GN=CSTA PE=1 SV=1	0	4.898	12.2449	1	10	1	1	98	11	5.5	High	High	High	Not Found	Not Found	Not Found		0.01	0.01	0.01	200	200	200				0.389	0	9.65	1	113	1
FALSE	High	IsMasterProtein	ch21i_P53801	Pituitary tumor-transforming gene 1 protein-interacting protein OS=Homo sapiens GN=PTTG1IP PE=1 SV=1	0	4.861	6.66667	1	4	1	1	180	20.3	8.79	Not Found	Peak Found	Not Found	Not Found	High	Not Found			0.841			108.6			91.4		0.334	0	2.3	1	33	1
FALSE	High	IsMasterProtein	ch09u_Q92688	Acidic leucine-rich nuclear phosphoprotein 32 family member B OS=Homo sapiens GN=ANP32B PE=1 SV=1	0	4.841	8.76494	2	4	1	1	251	28.8	4.06	Not Found	Not Found	High	Not Found	Not Found	Not Found											0.52	0	1.6	2	21	2
FALSE	High	IsMasterProtein	B3KUE5	Phospholipid transfer protein, isoform CRA_c OS=Homo sapiens GN=PLTP PE=2 SV=1	0	4.798	2.14425	1	4	1	1	513	56.6	6.64	High	Not Found	High	Not Found	Not Found	Not Found		0.01		0.01	200		200				0.086	0	5.33	1	43	1
FALSE	High	IsMasterProtein	A0A024R472	Transmembrane BAX inhibitor motif containing 1, isoform CRA_a OS=Homo sapiens GN=TMBIM1 PE=3 SV=1	0	4.785	4.50161	1	4	1	1	311	34.6	7.72	Not Found	Not Found	Not Found	Not Found	Not Found	Not Found											0.389	0	4.12	1	94	1
FALSE	High	IsMasterProtein	B3KSH1	Eukaryotic translation initiation factor 3 subunit F OS=Homo sapiens GN=EIF3F PE=2 SV=1	0	4.773	4.56989	1	2	1	1	372	39.1	5.45	Not Found	High	Not Found	Not Found	Not Found	Not Found											0.136	0	2.05	1	53	1
FALSE	High	IsMasterProtein	ch08i_P29218-3	Isoform 3 of Inositol monophosphatase 1 OS=Homo sapiens GN=IMPA1	0	4.763	6.25	2	5	2	1	336	36.7	7.91	High	Not Found	High	Not Found	Not Found	Not Found		0.01			200						0.259	0	0	2	30	2
FALSE	High	IsMasterProtein	ch09i_P10599	Thioredoxin OS=Homo sapiens GN=TXN PE=1 SV=3	0	4.748	12.381	1	6	1	1	105	11.7	4.92	High	High	High	Peak Found	Peak Found	Peak Found		0.118	0.147	0.14	178.8	174.3	175.4	21.2	25.7	24.6	0.389	0	6.06	1	80	1
FALSE	High	IsMasterProtein	ch06u_A0A0G2JM12	Casein kinase II subunit beta OS=Homo sapiens GN=CSNK2B PE=1 SV=1	0	4.739	3.61842	1	6	1	1	304	34.7	4.59	High	High	High	Peak Found	Not Found	Peak Found		0.282		0.18	156		169.5	44		30.5	0.212	0	6.99	1	70	1
FALSE	High	IsMasterProtein	Q59GX2	Solute carrier family 2 (Facilitated glucose transporter), member 1 variant (Fragment) OS=Homo sapiens PE=2 SV=1	0	4.693	2.70793	2	14	2	1	517	57	9.47	High	High	High	Peak Found	Peak Found	Peak Found		0.202	0.2	0.207	166.4	166.7	165.7	33.6	33.3	34.3	0.292	0	7.72	2	68	2
FALSE	High	IsMasterProtein	P23229	Integrin alpha-6 OS=Homo sapiens GN=ITGA6 PE=1 SV=5	0	4.673	1.9469	2	6	2	1	1130	126.5	6.61	Peak Found	Not Found	High	High	Not Found	High		0.275		0.188	156.9		168.4	43.1		31.6	0.07	0	2.3	2	25	2
FALSE	High	IsMasterProtein	P05089-2	Isoform 2 of Arginase-1 OS=Homo sapiens GN=ARG1	0	4.666	6.66667	2	6	2	1	330	35.6	7.21	High	Not Found	High	Not Found	Not Found	Not Found		0.01		0.01	200		200				0.274	0	1.65	2	37	2
FALSE	High	IsMasterProtein	ch09i_Q9H7P6	Multivesicular body subunit 12B OS=Homo sapiens GN=MVB12B PE=1 SV=2	0	4.663	7.83699	1	2	1	1	319	35.6	8.15	Not Found	Peak Found	Not Found	Not Found	High	Not Found			2.178			62.9			137.1		0.129	0	3.22	1	43	1
FALSE	High	IsMasterProtein	ch04u_D6RER5	Septin-11 OS=Homo sapiens GN=SEPT11 PE=1 SV=1	0	4.623	5.09259	2	9	2	1	432	49.8	6.68	High	High	High	Peak Found	Not Found	Not Found	Acetyl [N-Term]	0.118			178.9			21.1			0.194	0	5.25	1	70	2
FALSE	High	IsMasterProtein	ch09i_P13716-2	Isoform 2 of Delta-aminolevulinic acid dehydratase OS=Homo sapiens GN=ALAD	0	4.568	2.78552	1	6	1	1	359	39	7.65	Not Found	High	High	Not Found	Peak Found	Not Found			0.321			151.4			48.6		0.145	0	8.17	1	141	1
FALSE	High	IsMasterProtein	B2R9K8	cDNA, FLJ94440, highly similar to Homo sapiens chaperonin containing TCP1, subunit 6A (zeta 1)(CCT6A), mRNA OS=Homo sapiens PE=2 SV=1	0	4.556	2.25989	1	6	1	1	531	57.9	6.8	High	High	High	Not Found	Not Found	Not Found		0.01	0.01	0.01	200	200	200				0.077	0	5.74	1	47	1
FALSE	High	IsMasterProtein	ch10i_P61457	Pterin-4-alpha-carbinolamine dehydratase OS=Homo sapiens GN=PCBD1 PE=1 SV=2	0	4.55	13.4615	1	6	1	1	104	12	6.8	High	High	High	Not Found	Not Found	Not Found											0.334	0	7.26	1	57	1
FALSE	High	IsMasterProtein	B2R679	cDNA, FLJ92825, highly similar to Homo sapiens SAR1a gene homolog 1 (S. cerevisiae) (SARA1), mRNA OS=Homo sapiens PE=2 SV=1	0	4.499	5.55556	1	4	1	1	198	22.3	7.03	High	Not Found	High	Not Found	Not Found	Not Found											0.212	0	3.78	1	58	1
FALSE	High	IsMasterProtein	ch20u_P21980	Protein-glutamine gamma-glutamyltransferase 2 OS=Homo sapiens GN=TGM2 PE=1 SV=2	0	4.495	2.32897	1	2	1	1	687	77.3	5.22	Not Found	Not Found	Not Found	Not Found	Not Found	Not Found											0.059	0	1.93	1	53	1
FALSE	High	IsMasterProtein	B4DQ50	cDNA FLJ56823, highly similar to Protein-glutamine gamma-glutamyltransferase E (EC 2.3.2.13) OS=Homo sapiens PE=2 SV=1	0	4.494	2.25141	1	3	1	1	533	58.8	7.15	High	High	High	Not Found	Not Found	Not Found	Acetyl [N-Term]	0.01	0.01	0.01	200	200	200				0.075	0			91	1
FALSE	High	IsMasterProtein	ch01u_Q96P70	Importin-9 OS=Homo sapiens GN=IPO9 PE=1 SV=3	0	4.489	2.01729	1	1	1	1	1041	115.9	4.81	High	Not Found	Not Found	Peak Found	Not Found	Not Found	Acetyl [N-Term]	2.922			51			149			0.049	0			35	1
FALSE	High	IsMasterProtein	B2R8N1	cDNA, FLJ93976, highly similar to Homo sapiens COP9 homolog (COP9), mRNA OS=Homo sapiens PE=2 SV=1	0	4.441	7.17703	1	5	1	1	209	23.2	5.38	Not Found	High	High	Not Found	Not Found	Peak Found				0.047			191			9	0.259	0	0	1	47	1
FALSE	High	IsMasterProtein	B4DN31	cDNA FLJ55809 OS=Homo sapiens PE=2 SV=1	0	4.414	2.64317	1	5	1	1	454	51	8.87	High	High	High	High	Peak Found	Peak Found		0.799	0.858	0.819	111.2	107.7	109.9	88.8	92.3	90.1	0.194	0	1.69	1	14	1
FALSE	High	IsMasterProtein	ch11i_P84095	Rho-related GTP-binding protein RhoG OS=Homo sapiens GN=RHOG PE=1 SV=1	0	4.398	15.1832	2	6	2	1	191	21.3	8.12	Not Found	High	High	Not Found	Peak Found	High			0.152	0.168		173.5	171.3		26.5	28.7	0.468	0	2.21	2	36	2
FALSE	High	IsMasterProtein	Q96P63-2	Isoform 2 of Serpin B12 OS=Homo sapiens GN=SERPINB12	0	4.395	5.88235	2	6	2	1	425	48.4	5.39	Not Found	High	High	Not Found	Not Found	Not Found			0.01	0.01		200	200				0.233	0	3.78	2	26	2
FALSE	High	IsMasterProtein	ch05i_Q13283	Ras GTPase-activating protein-binding protein 1 OS=Homo sapiens GN=G3BP1 PE=1 SV=1	0	4.34	4.93562	1	5	1	1	466	52.1	5.52	High	High	High	Peak Found	Peak Found	Peak Found		0.314	0.2	0.178	152.2	166.7	169.8	47.8	33.3	30.2	0.212	0	0	1	0	1
FALSE	High	IsMasterProtein	ch01u_P62913	60S ribosomal protein L11 OS=Homo sapiens GN=RPL11 PE=1 SV=2	0	4.333	7.86517	1	6	1	1	178	20.2	9.6	High	High	High	Peak Found	Peak Found	Peak Found		0.13	0.155	0.108	177	173.2	180.5	23	26.8	19.5	0.292	0	5.68	1	105	1
FALSE	High	IsMasterProtein	chXi_Q16576-2	Isoform 2 of Histone-binding protein RBBP7 OS=Homo sapiens GN=RBBP7	0	4.31	3.41151	1	2	1	1	469	52.3	5.27	Not Found	High	Not Found	Not Found	Peak Found	Not Found			0.532			130.6			69.4		0.11	0	2.12	1	50	1
FALSE	High	IsMasterProtein	ch19u_Q8IZ83	Aldehyde dehydrogenase family 16 member A1 OS=Homo sapiens GN=ALDH16A1 PE=1 SV=2	0	4.305	1.62095	1	2	1	1	802	85.1	6.79	High	Not Found	Not Found	Not Found	Not Found	Not Found		0.01			200						0.072	0	2.32	1	44	1
FALSE	High	IsMasterProtein	D3DWY7	von Hippel-Lindau binding protein 1, isoform CRA_b OS=Homo sapiens GN=VBP1 PE=4 SV=1	0	4.305	4.29185	1	4	1	1	233	26.5	9.01	High	High	Not Found	Peak Found	Peak Found	Not Found		0.248	0.222		160.2	163.7		39.8	36.3		0.155	0	4.18	1	59	1
FALSE	High	IsMasterProtein	V9HW37	Epididymis secretory protein Li 69 OS=Homo sapiens GN=HEL-S-69 PE=1 SV=1	0	4.272	2.95749	1	2	1	1	541	59.6	5.66	Not Found	Not Found	High	Not Found	Not Found	Not Found				0.01			200				0.062	0	0	1	23	1
FALSE	High	IsMasterProtein	ch08i_Q92905	COP9 signalosome complex subunit 5 OS=Homo sapiens GN=COPS5 PE=1 SV=4	0	4.222	4.49102	2	7	2	1	334	37.6	6.54	High	High	High	Not Found	Not Found	Peak Found				0.134			176.3			23.7	0.259	0	8.38	2	67	1
FALSE	High	IsMasterProtein	ch22i_P17050	Alpha-N-acetylgalactosaminidase OS=Homo sapiens GN=NAGA PE=1 SV=2	0	4.177	2.6764	1	4	1	1	411	46.5	5.19	Not Found	Peak Found	Not Found	Not Found	High	High			3.136			48.4			151.6		0.11	0	3.88	1	30	1
FALSE	High	IsMasterProtein	P62854	40S ribosomal protein S26 OS=Homo sapiens GN=RPS26 PE=1 SV=3	0.001	4.02	7.82609	1	8	1	1	115	13	11	High	High	High	Peak Found	High	Peak Found		0.234	0.279	0.269	162.1	156.4	157.7	37.9	43.6	42.3	1.154	0	3.89	1	67	1
FALSE	High	IsMasterProtein	ch17u_K7ES00	Histone H3.3 (Fragment) OS=Homo sapiens GN=H3F3B PE=1 SV=1	0.001	4.017	11.9205	2	13	2	1	151	16.6	11.84	High	High	High	Peak Found	High	Peak Found		0.116	0.132	0.15	179.1	176.7	173.9	20.9	23.3	26.1	0.995	0	0	2	18	2
FALSE	High	IsMasterProtein	J9R021	Eukaryotic translation initiation factor 3 subunit A OS=Homo sapiens GN=eIF3a PE=2 SV=1	0.001	4.012	1.08538	1	4	1	1	1382	166.4	6.79	High	Not Found	High	Not Found	Not Found	Not Found		0.01			200						0.025	0	4.19	1	54	1
FALSE	High	IsMasterProtein	ch15i_O00161	Synaptosomal-associated protein 23 OS=Homo sapiens GN=SNAP23 PE=1 SV=1	0.001	3.931	6.63507	1	2	1	1	211	23.3	5.01	Not Found	Not Found	High	Not Found	Not Found	Not Found				0.01			200				0.179	0	2.16	1	35	1
FALSE	High	IsMasterProtein	ch01u_P53985	Monocarboxylate transporter 1 OS=Homo sapiens GN=SLC16A1 PE=1 SV=3	0.001	3.914	7.2	2	7	2	1	500	53.9	8.66	High	High	High	Peak Found	Peak Found	Peak Found		0.14	0.156	0.109	175.4	173.1	180.4	24.6	26.9	19.6	0.311	0	12.05	2	46	1
FALSE	High	IsMasterProtein	ch07i_P62851	40S ribosomal protein S25 OS=Homo sapiens GN=RPS25 PE=1 SV=1	0.001	3.886	15.2	2	10	2	1	125	13.7	10.11	High	High	High	Not Found	Peak Found	Peak Found			0.129	0.14		177.1	175.4		22.9	24.6	1.154	0	1.69	2	65	2
FALSE	High	IsMasterProtein	Q8NCC3	Group XV phospholipase A2 OS=Homo sapiens GN=PLA2G15 PE=1 SV=2	0.001	3.885	2.6699	1	2	1	1	412	46.6	6.73	Not Found	Not Found	Not Found	Not Found	High	Not Found			100						200		0.105	0	2.03	1	41	1
FALSE	High	IsMasterProtein	G3V2S9	SRA stem-loop-interacting RNA-binding protein, mitochondrial OS=Homo sapiens GN=SLIRP PE=1 SV=1	0.001	3.863	8.06452	1	2	1	1	124	13.9	11.09	Not Found	High	Not Found	Not Found	Not Found	Not Found											0.212	0	2.24	1	23	1
FALSE	High	IsMasterProtein	Q9UIU0	Dihydropyridine receptor alpha 2 subunit OS=Homo sapiens GN=CACNA2D1 PE=4 SV=1	0.001	3.853	1.44144	1	2	1	1	1110	125.2	5.36	Not Found	High	Not Found	Not Found	Not Found	Not Found			0.01			200					0.038	0	2.59	1	21	1
FALSE	High	IsMasterProtein	Q5VZU9	Tripeptidyl-peptidase 2 OS=Homo sapiens GN=TPP2 PE=1 SV=1	0.001	3.851	1.34707	1	1	1	1	1262	139.7	6.52	Not Found	Not Found	Not Found	Not Found	Not Found	Not Found	Acetyl [N-Term]										0.032	0			24	1
FALSE	High	IsMasterProtein	ch11i_P36404	ADP-ribosylation factor-like protein 2 OS=Homo sapiens GN=ARL2 PE=1 SV=4	0.001	3.846	4.8913	1	10	1	1	184	20.9	6.34	Peak Found	High	High	High	High	High		2.027	1.68	2.021	66.1	74.6	66.2	133.9	125.4	133.8	0.52	0	0	1	36	1
FALSE	High	IsMasterProtein	A0A024R1V4	60S ribosomal protein L27 OS=Homo sapiens GN=RPL27 PE=3 SV=1	0.001	3.844	13.2353	2	8	2	1	136	15.8	10.56	High	High	High	Peak Found	Peak Found	Peak Found		0.218	0.193	0.201	164.2	167.7	166.5	35.8	32.3	33.5	1.154	0	3.45	2	59	2
FALSE	High	IsMasterProtein	Q14204	Cytoplasmic dynein 1 heavy chain 1 OS=Homo sapiens GN=DYNC1H1 PE=1 SV=5	0.001	3.813	0.473526	2	8	2	1	4646	532.1	6.4	High	High	High	Not Found	Not Found	Peak Found		0.01	0.01	0.01	200	200	200				0.016	0	6.09	2	39	2
FALSE	High	IsMasterProtein	B2RDN9	cDNA, FLJ96699, highly similar to Homo sapiens thyroid autoantigen 70kDa (Ku antigen) (G22P1), mRNA OS=Homo sapiens PE=2 SV=1	0.001	3.802	2.29885	1	4	1	1	609	69.7	6.7	High	Not Found	High	Peak Found	Not Found	Peak Found		0.161		0.251	172.3		159.9	27.7		40.1	0.059	0	5.36	1	54	1
FALSE	High	IsMasterProtein	P42126	Enoyl-CoA delta isomerase 1, mitochondrial OS=Homo sapiens GN=ECI1 PE=1 SV=1	0.001	3.757	5.96026	2	7	2	1	302	32.8	8.54	High	Not Found	High	Not Found	Not Found	Not Found		0.01		0.01	200		200				0.389	0	0	2	41	2
FALSE	High	IsMasterProtein	A8KAQ3	cDNA FLJ76489, highly similar to Homo sapiens sortilin 1 (SORT1), mRNA OS=Homo sapiens PE=2 SV=1	0.001	3.73	1.20337	1	4	1	1	831	92	5.74	Not Found	Not Found	Peak Found	Not Found	Not Found	High				5.117			32.7			167.3	0.054	0	5.19	1	54	1
FALSE	High	IsMasterProtein	ch20u_A0A087WZM5	Peptidyl-prolyl cis-trans isomerase OS=Homo sapiens GN=FKBP1A PE=1 SV=1	0.001	3.718	10.0775	1	2	1	1	129	14.9	9.52	Not Found	High	High	Not Found	Not Found	Not Found											0.585	0			54	1
FALSE	High	IsMasterProtein	A0A024QZT9	NAD(P)H dehydrogenase, quinone 2, isoform CRA_a OS=Homo sapiens GN=NQO2 PE=4 SV=1	0.001	3.716	7.79221	1	4	1	1	231	25.9	6.29	High	High	Not Found	Not Found	Not Found	Not Found		0.01	0.01		200	200					0.166	0	0	1	55	1
FALSE	High	IsMasterProtein	B0LPF3	Growth factor receptor-bound protein 2 OS=Homo sapiens GN=GRB2 PE=2 SV=1	0.001	3.704	6.45161	1	2	1	1	217	25.2	6.32	Not Found	High	Not Found	Not Found	Peak Found	Not Found			0.93			103.6			96.4		0.136	0	2.19	1	33	1
FALSE	High	IsMasterProtein	P15880	40S ribosomal protein S2 OS=Homo sapiens GN=RPS2 PE=1 SV=2	0.001	3.693	3.75427	1	4	1	1	293	31.3	10.24	High	Not Found	High	Not Found	Not Found	Not Found				0.01			200				0.11	0	0	1	31	1
FALSE	High	IsMasterProtein	ch17i_E7EMK3	Flotillin-2 OS=Homo sapiens GN=FLOT2 PE=1 SV=1	0.001	3.65	2.89855	1	4	1	1	483	53.1	5.24	Not Found	High	High	Not Found	Not Found	Not Found				0.01			200				0.068	0	1.73	1	0	1
FALSE	High	IsMasterProtein	ch15i_P33316	Deoxyuridine 5'-triphosphate nucleotidohydrolase, mitochondrial OS=Homo sapiens GN=DUT PE=1 SV=4	0.001	3.648	3.1746	1	6	1	1	252	26.5	9.36	High	High	High	Peak Found	Peak Found	Peak Found		0.222	0.189	0.218	163.7	168.2	164.2	36.3	31.8	35.8	0.145	0	5.96	1	84	1
FALSE	High	IsMasterProtein	Q01469	Fatty acid-binding protein, epidermal OS=Homo sapiens GN=FABP5 PE=1 SV=3	0.001	3.584	6.66667	1	2	1	1	135	15.2	7.01	High	Not Found	High	Peak Found	Not Found	Peak Found	Acetyl [N-Term]	0.098		0.09	182.1		183.5	17.9		16.5	0.259	0			62	1
FALSE	High	IsMasterProtein	Q9UJ72	Annexin A10 OS=Homo sapiens GN=ANXA10 PE=1 SV=3	0.001	3.519	2.77778	1	4	1	1	324	37.3	5.33	High	Not Found	High	Not Found	Not Found	Not Found		0.01		0.01	200		200				0.122	0	0	1	42	1
FALSE	High	IsMasterProtein	A0A140VK27	Leukotriene A(4) hydrolase OS=Homo sapiens PE=2 SV=1	0.001	3.498	1.80033	1	2	1	1	611	69.2	6.18	Not Found	Not Found	Not Found	Not Found	Not Found	Not Found											0.059	0	2.31	1	36	1
FALSE	High	IsMasterProtein	ch19u_P31944	Caspase-14 OS=Homo sapiens GN=CASP14 PE=1 SV=2	0.001	3.484	4.13223	1	7	1	1	242	27.7	5.58	High	High	High	Not Found	Not Found	Not Found			0.01	0.01		200	200				0.136	0	7.21	1	0	1
FALSE	High	IsMasterProtein	ch10u_P61163	Alpha-centractin OS=Homo sapiens GN=ACTR1A PE=1 SV=1	0.001	3.458	4.25532	1	2	1	1	376	42.6	6.64	High	Not Found	Not Found	Peak Found	Not Found	Not Found		0.573			127.2			72.8			0.105	0	0	1	44	1
FALSE	High	IsMasterProtein	ch04u_Q8NB90	Spermatogenesis-associated protein 5 OS=Homo sapiens GN=SPATA5 PE=1 SV=3	0.001	3.425	1.34378	1	2	1	1	893	97.8	5.66	Not Found	Not Found	Not Found	Not Found	Not Found	Not Found											0.041	0	2.38	1	16	1
FALSE	High	IsMasterProtein	ch19u_P54920	Alpha-soluble NSF attachment protein OS=Homo sapiens GN=NAPA PE=1 SV=3	0.001	3.374	4.40678	1	6	1	1	295	33.2	5.36	High	High	High	Not Found	Not Found	Not Found											0.116	0	3.76	1	28	1
FALSE	High	IsMasterProtein	ch12i_P02458	Collagen alpha-1(II) chain OS=Homo sapiens GN=COL2A1 PE=1 SV=3	0.001	3.352	1.07599	1	4	1	1	1487	141.7	6.92	High	Not Found	High	Not Found	Not Found	Not Found											0.026	0	4.24	1	20	1
FALSE	High	IsMasterProtein	ch11u_H7C3X5	Syntaxin-5 (Fragment) OS=Homo sapiens GN=STX5 PE=1 SV=1	0.001	3.328	8.22785	1	8	1	1	158	17.6	7.06	Not Found	High	High	Not Found	Peak Found	Peak Found			0.198	0.204		167	166.2		33	33.8	0.585	0	0	1	0	1
FALSE	High	IsMasterProtein	Q59FI9	Ribosomal protein L12 variant (Fragment) OS=Homo sapiens PE=2 SV=1	0.001	3.32	4.56853	1	4	1	1	197	21.5	10.1	High	Not Found	High	Peak Found	Not Found	Peak Found		0.175		0.182	170.2		169.2	29.8		30.8	0.212	0	3.85	1	56	1
FALSE	High	IsMasterProtein	ch03u_Q12841	Follistatin-related protein 1 OS=Homo sapiens GN=FSTL1 PE=1 SV=1	0.001	3.309	7.79221	2	4	2	1	308	35	5.52	Not Found	Peak Found	Not Found	Not Found	High	High			7.002			25			175		0.222	0	1.9	2	19	2
FALSE	High	IsMasterProtein	ch02i_D6W5L6	Pulmonary surfactant-associated protein B OS=Homo sapiens GN=SFTPB PE=1 SV=1	0.001	3.268	3.05344	1	4	1	1	393	43.3	5.74	High	Not Found	High	Not Found	Not Found	Not Found		0.01		0.01	200		200				0.136	0	1.88	1	39	1
FALSE	High	IsMasterProtein	ch12u_P61626	Lysozyme C OS=Homo sapiens GN=LYZ PE=1 SV=1	0.001	3.208	8.10811	1	2	1	1	148	16.5	9.16	Not Found	Not Found	High	Not Found	Not Found	Not Found				0.01			200				0.233	0	0	1	35	1
FALSE	High	IsMasterProtein	ch11u_Q9BRL6	Serine/arginine-rich splicing factor 8 OS=Homo sapiens GN=SRSF8 PE=1 SV=1	0.001	3.192	2.83688	1	6	1	1	282	32.3	11.72	High	High	High	Not Found	Peak Found	Not Found			0.059			188.8			11.2		0.179	0	5.22	1	76	1
FALSE	High	IsMasterProtein	P02452	Collagen alpha-1(I) chain OS=Homo sapiens GN=COL1A1 PE=1 SV=5	0.001	3.16	0.68306	1	6	1	1	1464	138.9	5.8	High	High	High	Not Found	Not Found	Not Found		0.01	0.01	0.01	200	200	200				0.026	0	5.6	1	46	1
FALSE	High	IsMasterProtein	P09529	Inhibin beta B chain OS=Homo sapiens GN=INHBB PE=1 SV=2	0.001	3.151	5.65111	2	4	2	1	407	45.1	8.03	Not Found	Peak Found	Not Found	Not Found	High	High			4.738			34.9			165.1		0.259	0	0	2	29	2
FALSE	High	IsMasterProtein	ch19i_Q7Z7M0	Multiple epidermal growth factor-like domains protein 8 OS=Homo sapiens GN=MEGF8 PE=1 SV=2	0.001	3.128	0.386643	1	2	1	1	2845	302.9	6.87	Not Found	Not Found	Peak Found	Not Found	Not Found	High				0.121			178.5			21.5	0.019	0	2.49	1	30	1
FALSE	High	IsMasterProtein	ch11i_P01344-3	Isoform 3 of Insulin-like growth factor II OS=Homo sapiens GN=IGF2	0.001	3.127	3.81356	1	6	1	1	236	26.3	9.13	High	High	High	Peak Found	Peak Found	Peak Found		0.119	0.141	0.107	178.8	175.3	180.6	21.2	24.7	19.4	0.194	0	1.65	1	32	1
FALSE	High	IsMasterProtein	ch11i_Q8IX04	Ubiquitin-conjugating enzyme E2 variant 3 OS=Homo sapiens GN=UEVLD PE=1 SV=2	0.001	3.11	4.67091	2	8	2	1	471	52.2	7.09	High	High	High	Peak Found	Not Found	Peak Found		0.412	0.01	0.432	141.7	200	139.7	58.3		60.3	0.16	0	6.71	2	24	2
FALSE	High	IsMasterProtein	H7C1E4	AP-1 complex subunit sigma-1A (Fragment) OS=Homo sapiens GN=AP1S1 PE=1 SV=1	0.001	3.083	8.37696	1	4	1	1	191	22.2	9.16	Not Found	High	High	Not Found	Not Found	Not Found				0.01			200				0.233	0	0	1	53	1
FALSE	High	IsMasterProtein	ch02i_J3KQ32	Obg-like ATPase 1 OS=Homo sapiens GN=OLA1 PE=1 SV=1	0.001	3.068	3.60577	1	4	1	1	416	46.9	8.06	High	Not Found	High	Not Found	Not Found	Not Found		0.01		0.01	200		200				0.089	0	1.78	1	35	1
FALSE	High	IsMasterProtein	ch19u_Q99426	Tubulin-folding cofactor B OS=Homo sapiens GN=TBCB PE=1 SV=2	0.001	3.028	6.55738	1	2	1	1	244	27.3	5.15	Not Found	High	Not Found	Not Found	Peak Found	Not Found			0.412			141.6			58.4		0.155	0	2.13	1	13	1
FALSE	High	IsMasterProtein	ch09i_P62753	40S ribosomal protein S6 OS=Homo sapiens GN=RPS6 PE=1 SV=1	0.001	3.018	4.81928	1	2	1	1	249	28.7	10.84	High	Not Found	Not Found	Not Found	Not Found	Not Found											0.194	0	0	1	31	1
FALSE	High	IsMasterProtein	B7Z2B0	cDNA FLJ53470, highly similar to Calcium/calmodulin-dependent protein kinase type II delta chain (EC 2.7.11.17) OS=Homo sapiens PE=2 SV=1	0.001	3.017	3.37711	1	2	1	1	533	60	7.27	Not Found	Not Found	Not Found	Not Found	Not Found	Not Found											0.075	0	0	1	33	1
FALSE	High	IsMasterProtein	ch09u_J3KN16	Proteasome-associated protein ECM29 homolog OS=Homo sapiens GN=KIAA0368 PE=1 SV=1	0.001	2.993	0.743679	1	6	1	1	2017	223.6	8.75	High	High	High	Not Found	Not Found	Not Found		0.01	0.01	0.01	200	200	200				0.019	0	6.3	1	25	1
FALSE	High	IsMasterProtein	ch11u_P48509	CD151 antigen OS=Homo sapiens GN=CD151 PE=1 SV=3	0.001	2.982	3.95257	1	6	1	1	253	28.3	7.47	High	High	High	Peak Found	Peak Found	Peak Found		0.405	0.431	0.41	142.3	139.8	141.8	57.7	60.2	58.2	0.179	0	0	1	39	1
FALSE	High	IsMasterProtein	O43760-2	Isoform 2 of Synaptogyrin-2 OS=Homo sapiens GN=SYNGR2	0.001	2.953	7.27273	2	8	2	1	275	30.4	9.2	High	High	High	Not Found	Not Found	Not Found		0.01			200						0.292	0	5.85	2	23	2
FALSE	High	IsMasterProtein	ch22u_P14174	Macrophage migration inhibitory factor OS=Homo sapiens GN=MIF PE=1 SV=4	0.001	2.94	7.82609	1	6	1	1	115	12.5	7.88	High	High	High	Not Found	Not Found	Not Found											0.778	0	1.69	1	40	1
FALSE	High	IsMasterProtein	ch07i_P12273	Prolactin-inducible protein OS=Homo sapiens GN=PIP PE=1 SV=1	0.001	2.914	7.53425	1	2	1	1	146	16.6	8.05	High	Not Found	Not Found	Peak Found	Not Found	Not Found		0.385			144.4			55.6			0.212	0	0	1	38	1
FALSE	High	IsMasterProtein	ch20i_Q15691	Microtubule-associated protein RP/EB family member 1 OS=Homo sapiens GN=MAPRE1 PE=1 SV=3	0.001	2.9	6.71642	1	6	1	1	268	30	5.14	High	High	High	Not Found	Peak Found	Peak Found			0.277	0.259		156.6	158.8		43.4	41.2	0.136	0	0	1	15	1
FALSE	High	IsMasterProtein	B7Z5L4	cDNA FLJ61340, highly similar to Homo sapiens seizure related 6 homolog-like 2 (SEZ6L2), transcript variant 2, mRNA OS=Homo sapiens PE=2 SV=1	0.001	2.891	2.0585	2	4	2	1	923	99	4.86	Not Found	Peak Found	Not Found	Not Found	High	Not Found			3.753			42.1			157.9		0.15	0	2.51	2	15	2
FALSE	High	IsMasterProtein	ch08i_Q15369	Transcription elongation factor B polypeptide 1 OS=Homo sapiens GN=TCEB1 PE=1 SV=1	0.001	2.886	11.6071	1	4	1	1	112	12.5	4.78	High	High	Not Found	Peak Found	Peak Found	Not Found		0.229	0.306		162.8	153.1		37.2	46.9		0.334	0	0	1	30	1
FALSE	High	IsMasterProtein	B4DJ30	cDNA FLJ61290, highly similar to Neutral alpha-glucosidase AB OS=Homo sapiens PE=2 SV=1	0.001	2.883	3.11558	2	9	2	1	995	112.9	6.06	High	High	High	Peak Found	Peak Found	Peak Found		0.453	0.287	0.354	137.6	155.5	147.7	62.4	44.5	52.3	0.086	0	0	2	17	2
FALSE	High	IsMasterProtein	B4DY83	cDNA FLJ59579, weakly similar to Homo sapiens golgi autoantigen, golgin subfamily a-like, mRNA OS=Homo sapiens PE=2 SV=1	0.001	2.88	5.85106	1	5	1	1	564	69.2	5.08	Not Found	Not Found	Not Found	Not Found	Not Found	Not Found											0.141	0			0	1
FALSE	High	IsMasterProtein	ch17i_O75674	TOM1-like protein 1 OS=Homo sapiens GN=TOM1L1 PE=1 SV=2	0.001	2.874	2.73109	1	2	1	1	476	53	5.24	High	Not Found	Not Found	Peak Found	Not Found	Not Found											0.145	0	1.83	1	27	1
FALSE	High	IsMasterProtein	ch13u_A0A024R644	Ceroid-lipofuscinosis neuronal protein 5 OS=Homo sapiens GN=CLN5 PE=1 SV=1	0.001	2.862	2.2113	1	6	1	1	407	46.3	8.38	Not Found	Peak Found	Not Found	Not Found	High	High			4.418			36.9			163.1		0.101	0	5.78	1	44	1
FALSE	High	IsMasterProtein	chXi_Q8TCZ2-5	Isoform 5 of CD99 antigen-like protein 2 OS=Homo sapiens GN=CD99L2	0.001	2.858	7.35294	1	2	1	1	272	28.9	5.07	Not Found	Not Found	High	Not Found	Not Found	Not Found											0.166	0	0	1	0	1
FALSE	High	IsMasterProtein	ch18i_P29508	Serpin B3 OS=Homo sapiens GN=SERPINB3 PE=1 SV=2	0.001	2.853	3.58974	2	6	2	1	390	44.5	6.81	High	Not Found	High	Not Found	Not Found	Not Found		0.01		0.01	200		200				0.212	0	0	2	18	2
FALSE	High	IsMasterProtein	Q96HR9	Receptor expression-enhancing protein 6 OS=Homo sapiens GN=REEP6 PE=1 SV=1	0.001	2.843	5.43478	1	4	1	1	184	20.7	8.56	Not Found	High	High	Not Found	Not Found	Not Found											0.233	0	1.7	1	55	1
FALSE	High	IsMasterProtein	ch17i_Q9UHD8	Septin-9 OS=Homo sapiens GN=SEPT9 PE=1 SV=2	0.001	2.841	1.53584	1	2	1	1	586	65.4	8.97	Not Found	High	Not Found	Not Found	Not Found	Not Found											0.059	0	1.6	1	54	1
FALSE	High	IsMasterProtein	O95445	Apolipoprotein M OS=Homo sapiens GN=APOM PE=1 SV=2	0.001	2.829	6.91489	2	19	2	1	188	21.2	6.01	High	High	High	Not Found	Not Found	Not Found		0.01	0.01	0.01	200	200	200				0.425	0	6.69	2	139	2
FALSE	High	IsMasterProtein	I1SRC5	UBE2L3/KRAS fusion protein OS=Homo sapiens PE=2 SV=1	0.001	2.821	4.05405	1	4	1	1	296	34	8.1	High	Not Found	High	Peak Found	Not Found	Peak Found				0.177			170			30	0.145	0	3.87	1	31	1
FALSE	High	IsMasterProtein	Q14014	PR310 c-K-ras protein (Fragment) OS=Homo sapiens PE=2 SV=1	0.001	2.821	8	1	4	1	1	150	16.9	5.21	High	Not Found	High	Peak Found	Not Found	Peak Found		0.194			167.5			32.5			0.292	0	3.87	1	31	1
FALSE	High	IsMasterProtein	B4E1J8	cDNA FLJ56285, highly similar to ADP-ribosylation factor-like protein 8B OS=Homo sapiens PE=2 SV=1	0.001	2.807	3.78151	1	6	1	1	238	27.2	9.66	High	High	High	Peak Found	Peak Found	Peak Found		0.257	0.241	0.241	159.1	161.2	161.1	40.9	38.8	38.9	0.194	0	0	1	60	1
FALSE	High	IsMasterProtein	E9PGC8	Microtubule-associated protein 1A OS=Homo sapiens GN=MAP1A PE=1 SV=1	0.001	2.794	0.328839	1	4	1	1	3041	331.1	4.93	Not Found	High	High	Not Found	Not Found	Not Found											0.016	0	0	1	48	1
FALSE	High	IsMasterProtein	Q13103	Secreted phosphoprotein 24 OS=Homo sapiens GN=SPP2 PE=1 SV=1	0.001	2.716	5.6872	1	6	1	1	211	24.3	8.32	High	High	High	Not Found	Not Found	Not Found		0.01	0.01	0.01	200	200	200				0.194	0	0	1	35	1
FALSE	High	IsMasterProtein	E1NZA1	Peroxisome proliferator activated receptor interacting complex protein OS=Homo sapiens GN=PRIC295 PE=2 SV=1	0.001	2.716	0.262074	1	17	1	1	2671	292.6	7.43	Not Found	High	High	Not Found	High	High			2.439	2.458		58.1	57.8		141.9	142.2	0.026	0	0	1	98	1
FALSE	High	IsMasterProtein	P61077-2	Isoform 2 of Ubiquitin-conjugating enzyme E2 D3 OS=Homo sapiens GN=UBE2D3	0.002	2.686	6.75676	1	2	1	1	148	16.8	7.3	Not Found	High	Not Found	Not Found	Peak Found	Not Found			0.262			158.5			41.5		0.585	0	0	1	42	1
FALSE	High	IsMasterProtein	ch17i_O60271	C-Jun-amino-terminal kinase-interacting protein 4 OS=Homo sapiens GN=SPAG9 PE=1 SV=4	0.002	2.68	1.4383	1	2	1	1	1321	146.1	5.15	Not Found	Not Found	High	Not Found	Not Found	Not Found											0.03	0	0	1	25	1
FALSE	High	IsMasterProtein	B2R5I8	cDNA, FLJ92490, highly similar to Homo sapiens RAB32, member RAS oncogene family (RAB32), mRNA OS=Homo sapiens PE=2 SV=1	0.002	2.68	4.88889	1	2	1	1	225	24.9	6.68	High	Not Found	Not Found	Peak Found	Not Found	Not Found		0.344			148.8			51.2			0.155	0	1.72	1	33	1
FALSE	High	IsMasterProtein	Q59FR8	Galectin (Fragment) OS=Homo sapiens PE=2 SV=1	0.002	2.673	4.26357	1	10	1	1	258	27.1	8.41	High	High	High	Peak Found	Peak Found	Peak Found		0.17	0.209	0.25	171	165.4	159.9	29	34.6	40.1	0.212	0	2.01	1	18	1
FALSE	High	IsMasterProtein	A0A068W6H0	Basal cell adhesion molecule (Lutheran blood group) OS=Homo sapiens GN=BCAM PE=4 SV=1	0.002	2.646	3.66242	1	2	1	1	628	67.4	5.9	Not Found	Not Found	Not Found	Not Found	Not Found	Not Found											0.062	0	0	1	0	1
FALSE	High	IsMasterProtein	ch01i_Q9HB71	Calcyclin-binding protein OS=Homo sapiens GN=CACYBP PE=1 SV=2	0.002	2.63	13.5965	2	6	2	1	228	26.2	8.25	High	High	High	Not Found	Peak Found	Peak Found		0.01	0.22	0.244	200	164	160.7		36	39.3	0.389	0	1.67	2	30	2
FALSE	High	IsMasterProtein	ch01u_Q9UBV8	Peflin OS=Homo sapiens GN=PEF1 PE=1 SV=1	0.002	2.612	3.52113	1	3	1	1	284	30.4	6.54	Not Found	High	High	Not Found	Peak Found	Peak Found			0.522	0.351		131.4	148.1		68.6	51.9	0.259	0	0	1	0	1
FALSE	High	IsMasterProtein	ch01u_P67809	Nuclease-sensitive element-binding protein 1 OS=Homo sapiens GN=YBX1 PE=1 SV=3	0.002	2.576	13.8889	2	10	2	1	324	35.9	9.88	High	Not Found	High	Not Found	Not Found	Not Found		0.01			200						0.389	0	0	2	0	2
FALSE	High	IsMasterProtein	ch06u_A0A0U1RRH7	Histone H2A OS=Homo sapiens PE=3 SV=1	0.002	2.56	5.29412	1	6	1	1	170	18.5	11.52	Peak Found	High	High	High	Not Found	Not Found		0.138			175.7			24.3			0.52	0	0	1	15	1
FALSE	High	IsMasterProtein	A0A024R319	Laminin, beta 2 (Laminin S), isoform CRA_a OS=Homo sapiens GN=LAMB2 PE=4 SV=1	0.002	2.556	1.05673	1	2	1	1	1798	195.9	6.52	Not Found	Not Found	Not Found	Not Found	Not Found	Not Found											0.021	0	2.82	1	17	1
FALSE	High	IsMasterProtein	ch22u_O15031	Plexin-B2 OS=Homo sapiens GN=PLXNB2 PE=1 SV=3	0.002	2.544	0.489663	1	4	1	1	1838	205	6.24	Not Found	High	High	Not Found	Not Found	Not Found			0.01	0.01		200	200				0.022	0	3.57	1	25	1
FALSE	High	IsMasterProtein	B4DIM6	cDNA FLJ60015, highly similar to Adapter-related protein complex 1 sigma- 1B subunit OS=Homo sapiens PE=2 SV=1	0.002	2.521	4.34783	1	6	1	1	207	24.2	9.41	High	High	High	Peak Found	Peak Found	Peak Found		0.074	0.087	0.098	186.2	184	182.1	13.8	16	17.9	0.194	0	3.56	1	62	1
FALSE	High	IsMasterProtein	ch10i_Q9NZT1	Calmodulin-like protein 5 OS=Homo sapiens GN=CALML5 PE=1 SV=2	0.002	2.491	9.58904	1	1	1	1	146	15.9	4.44	High	Not Found	Not Found	Not Found	Not Found	Not Found	Acetyl [N-Term]	0.01			200						0.292	0			23	1
FALSE	High	IsMasterProtein	P13667	Protein disulfide-isomerase A4 OS=Homo sapiens GN=PDIA4 PE=1 SV=2	0.002	2.48	1.86047	1	2	1	1	645	72.9	5.07	Not Found	Not Found	High	Not Found	Not Found	Not Found				0.01			200				0.051	0	2.27	1	28	1
FALSE	High	IsMasterProtein	ch08u_Q9NYI0	PH and SEC7 domain-containing protein 3 OS=Homo sapiens GN=PSD3 PE=1 SV=2	0.002	2.475	0.763359	1	5	1	1	1048	116	5.99	High	High	Not Found	Peak Found	High	Not Found		1.886	1.958		69.3	67.6		130.7	132.4		0.077	0	0	1	0	1
FALSE	High	IsMasterProtein	B5BU81	YKT6 v-SNARE protein OS=Homo sapiens GN=YKT6 PE=2 SV=1	0.002	2.47	4.0404	1	2	1	1	198	22.4	6.92	Not Found	Not Found	High	Not Found	Not Found	Not Found											0.179	0	1.66	1	31	1
FALSE	High	IsMasterProtein	ch13u_P09429	High mobility group protein B1 OS=Homo sapiens GN=HMGB1 PE=1 SV=3	0.002	2.463	7.44186	2	3	2	1	215	24.9	5.74	High	Not Found	Not Found	Not Found	Not Found	Not Found		0.01			200						0.52	0	0	2	0	1
FALSE	High	IsMasterProtein	A0A024R2Q7	C-type lectin domain family 3, member B, isoform CRA_a OS=Homo sapiens GN=CLEC3B PE=4 SV=1	0.002	2.459	5.94059	1	4	1	1	202	22.5	5.67	High	High	Not Found	Not Found	Not Found	Not Found		0.01	0.01		200	200					0.212	0	0	1	31	1
FALSE	High	IsMasterProtein	ch04u_C9JC84	Fibrinogen gamma chain OS=Homo sapiens GN=FGG PE=1 SV=1	0.002	2.415	2.38612	1	4	1	1	461	52.3	5.63	High	High	Not Found	Not Found	Not Found	Not Found		0.01	0.01		200	200					0.083	0	0	1	16	1
FALSE	High	IsMasterProtein	ch01i_P31151	Protein S100-A7 OS=Homo sapiens GN=S100A7 PE=1 SV=4	0.002	2.411	11.8812	1	3	1	1	101	11.5	6.77	High	High	Not Found	Not Found	Not Found	Not Found		0.01	0.01		200	200					0.389	0	0	1	22	1
FALSE	High	IsMasterProtein	Q8N2S1	Latent-transforming growth factor beta-binding protein 4 OS=Homo sapiens GN=LTBP4 PE=1 SV=2	0.002	2.378	0.862069	1	2	1	1	1624	173.3	5.43	Not Found	Not Found	Not Found	Not Found	Not Found	Not Found											0.029	0	1.74	1	25	1
FALSE	High	IsMasterProtein	B2RDD7	Protein arginine N-methyltransferase 5 OS=Homo sapiens PE=2 SV=1	0.002	2.373	2.04082	1	2	1	1	637	72.7	6.29	High	Not Found	Not Found	Not Found	Not Found	Not Found		0.01			200						0.062	0	1.67	1	0	1
FALSE	High	IsMasterProtein	Q13085-4	Isoform 4 of Acetyl-CoA carboxylase 1 OS=Homo sapiens GN=ACACA	0.002	2.327	0.923206	2	6	2	1	2383	269.8	6.52	Not Found	High	High	Not Found	Not Found	Not Found			0.01	0.01		200	200				0.032	0	0	2	16	2
FALSE	High	IsMasterProtein	ch16u_P61970	Nuclear transport factor 2 OS=Homo sapiens GN=NUTF2 PE=1 SV=1	0.002	2.3	6.29921	1	2	1	1	127	14.5	5.38	Not Found	Not Found	High	Not Found	Not Found	Not Found				0.01			200				0.334	0	0	1	20	1
FALSE	High	IsMasterProtein	P60866-2	Isoform 2 of 40S ribosomal protein S20 OS=Homo sapiens GN=RPS20	0.002	2.292	4.92958	1	2	1	1	142	16	9.32	High	Not Found	Not Found	Not Found	Not Found	Not Found											0.389	0	1.66	1	38	1
FALSE	High	IsMasterProtein	B3KM43	cDNA FLJ10228 fis, clone HEMBB1000119, highly similar to N-acetylserotonin O-methyltransferase-like protein OS=Homo sapiens PE=2 SV=1	0.002	2.283	2.0934	1	6	1	1	621	68.8	6.13	Peak Found	Not Found	Peak Found	High	High	High		11.103		9.958	16.5		18.3	183.5		181.7	0.068	0	0	1	16	1
FALSE	High	IsMasterProtein	chXi_P98172	Ephrin-B1 OS=Homo sapiens GN=EFNB1 PE=1 SV=1	0.002	2.281	5.20231	1	2	1	1	346	38	8.94	Peak Found	Not Found	Not Found	High	Not Found	Not Found		1.149			93.1			106.9			0.11	0	0	1	47	1
FALSE	High	IsMasterProtein	Q9UHN6	Transmembrane protein 2 OS=Homo sapiens GN=TMEM2 PE=1 SV=1	0.002	2.277	1.01229	1	4	1	1	1383	154.3	8.15	High	Not Found	High	Not Found	Not Found	Not Found											0.026	0	0	1	40	1
FALSE	High	IsMasterProtein	G3V3D1	Epididymal secretory protein E1 (Fragment) OS=Homo sapiens GN=NPC2 PE=1 SV=1	0.002	2.26	7.23982	1	4	1	1	221	23.7	6.73	Not Found	Not Found	Not Found	High	High	Not Found		100	100					200	200		0.233	0	0	1	37	1
FALSE	High	IsMasterProtein	ch01u_Q9P2B2	Prostaglandin F2 receptor negative regulator OS=Homo sapiens GN=PTGFRN PE=1 SV=2	0.002	2.243	1.25142	1	4	1	1	879	98.5	6.61	High	High	Not Found	Not Found	Not Found	Not Found											0.044	0	0	1	0	1
FALSE	High	IsMasterProtein	ch17u_P62829	60S ribosomal protein L23 OS=Homo sapiens GN=RPL23 PE=1 SV=1	0.002	2.239	5.71429	1	4	1	1	140	14.9	10.51	High	High	Not Found	Not Found	Not Found	Not Found			0.01			200					0.259	0	0	1	36	1
FALSE	High	IsMasterProtein	Q14691	DNA replication complex GINS protein PSF1 OS=Homo sapiens GN=GINS1 PE=1 SV=1	0.002	2.223	7.14286	1	6	1	1	196	23	7.39	High	High	High	Not Found	Not Found	Peak Found				0.165			171.6			28.4	0.155	0	1.64	1	47	1
FALSE	High	IsMasterProtein	O14828	Secretory carrier-associated membrane protein 3 OS=Homo sapiens GN=SCAMP3 PE=1 SV=3	0.002	2.212	4.61095	1	2	1	1	347	38.3	7.64	Not Found	Not Found	High	Not Found	Not Found	Not Found											0.166	0	1.79	1	32	1
FALSE	High	IsMasterProtein	Q9H8M9	Protein eva-1 homolog A OS=Homo sapiens GN=EVA1A PE=1 SV=1	0.002	2.203	7.23684	1	6	1	1	152	17.5	6.93	High	High	High	Peak Found	Peak Found	Peak Found		0.245	0.232	0.254	160.7	162.3	159.5	39.3	37.7	40.5	0.468	0	0	1	39	1
FALSE	High	IsMasterProtein	B2RDI5	cDNA, FLJ96627, highly similar to Homo sapiens calpain 1, (mu/I) large subunit (CAPN1), mRNA OS=Homo sapiens PE=2 SV=1	0.002	2.202	1.40056	1	2	1	1	714	81.8	5.54	Not Found	Not Found	High	Not Found	Not Found	Not Found				0.01			200				0.056	0	0	1	15	1
FALSE	High	IsMasterProtein	ch05u_P62266	40S ribosomal protein S23 OS=Homo sapiens GN=RPS23 PE=1 SV=3	0.002	2.19	7.69231	1	4	1	1	143	15.8	10.49	High	Not Found	High	Not Found	Not Found	Not Found											0.334	0	1.65	1	14	1
FALSE	High	IsMasterProtein	ch16i_Q13232	Nucleoside diphosphate kinase 3 OS=Homo sapiens GN=NME3 PE=1 SV=2	0.002	2.184	5.91716	1	2	1	1	169	19	7.84	Not Found	Not Found	High	Not Found	Not Found	Not Found											0.212	0	0	1	21	1
FALSE	High	IsMasterProtein	Q15274	Nicotinate-nucleotide pyrophosphorylase [carboxylating] OS=Homo sapiens GN=QPRT PE=1 SV=3	0.002	2.173	2.6936	1	4	1	1	297	30.8	6.21	High	High	Not Found	Not Found	Not Found	Not Found		0.01	0.01		200	200					0.155	0	1.78	1	0	1
FALSE	High	IsMasterProtein	ch04u_D6RAR4	Hepatocyte growth factor activator OS=Homo sapiens GN=HGFAC PE=1 SV=1	0.002	2.168	1.81269	1	2	1	1	662	71.4	7.05	Not Found	Not Found	Not Found	Not Found	Not Found	Not Found											0.072	0	1.88	1	18	1
FALSE	High	IsMasterProtein	ch08i_Q16394	Exostosin-1 OS=Homo sapiens GN=EXT1 PE=1 SV=2	0.002	2.158	1.34048	1	4	1	1	746	86.2	9.04	Peak Found	Not Found	Peak Found	High	Not Found	High		2.989		4.08	50.1		39.4	149.9		160.6	0.056	0	5.1	1	29	1
FALSE	High	IsMasterProtein	Q5H9N4	Putative uncharacterized protein DKFZp686L20222 OS=Homo sapiens GN=DKFZp686L20222 PE=3 SV=1	0.002	2.13	3.30033	1	4	1	1	303	34.8	8.95	High	High	Not Found	Peak Found	Peak Found	Not Found		0.621	0.591		123.4	125.7		76.6	74.3		0.116	0	4.64	1	34	1
FALSE	High	IsMasterProtein	ch14i_G3V4T6	Maleylacetoacetate isomerase OS=Homo sapiens GN=GSTZ1 PE=1 SV=1	0.002	2.119	5.99078	1	2	1	1	217	24.2	7.18	High	High	Not Found	Not Found	Not Found	Not Found	Acetyl [N-Term]	0.01	0.01		200	200					0.194	0			29	1
FALSE	High	IsMasterProtein	ch19u_P46781	40S ribosomal protein S9 OS=Homo sapiens GN=RPS9 PE=1 SV=3	0.002	2.094	6.18557	1	2	1	1	194	22.6	10.65	Not Found	Not Found	High	Not Found	Not Found	Not Found				0.01			200				0.179	0	0	1	22	1
FALSE	High	IsMasterProtein	ch07i_P30626	Sorcin OS=Homo sapiens GN=SRI PE=1 SV=1	0.002	2.085	5.55556	1	4	1	1	198	21.7	5.59	High	Not Found	Not Found	Not Found	Not Found	Not Found		0.01			200						0.212	0	0	1	27	1
FALSE	High	IsMasterProtein	ch15u_Q9NPE2	Neugrin OS=Homo sapiens GN=NGRN PE=1 SV=2	0.002	2.08	4.12371	1	2	1	1	291	32.4	9.1	High	Not Found	Not Found	Not Found	Not Found	Not Found		0.01			200						0.116	0	0	1	38	1
FALSE	High	IsMasterProtein	ch10i_Q9NZM1	Myoferlin OS=Homo sapiens GN=MYOF PE=1 SV=1	0.002	2.075	0.582242	1	2	1	1	2061	234.6	6.18	Not Found	High	Not Found	Not Found	Not Found	Not Found			0.01			200					0.017	0	0	1	0	1
FALSE	High	IsMasterProtein	A0A024R6W0	Aspartate aminotransferase OS=Homo sapiens GN=GOT2 PE=4 SV=1	0.002	2.074	1.86047	1	4	1	1	430	47.4	9.01	High	Not Found	High	Not Found	Not Found	Not Found											0.083	0	1.95	1	34	1
FALSE	High	IsMasterProtein	P09237	Matrilysin OS=Homo sapiens GN=MMP7 PE=1 SV=1	0.002	2.063	4.11985	1	4	1	1	267	29.7	7.91	Not Found	Not Found	Not Found	High	Not Found	High				100						200	0.194	0	0	1	19	1
FALSE	High	IsMasterProtein	A0A024R0R4	SUMO-1 activating enzyme subunit 1, isoform CRA_b OS=Homo sapiens GN=SAE1 PE=4 SV=1	0.002	2.059	2.60116	1	2	1	1	346	38.4	5.3	High	Not Found	Not Found	Not Found	Not Found	Not Found		0.01			200						0.105	0	0	1	0	1
FALSE	High	IsMasterProtein	X5DNI1	Collapsin response mediator protein 1 isoform A (Fragment) OS=Homo sapiens GN=CRMP1 PE=2 SV=1	0.002	2.054	1.02041	1	2	1	1	686	74.2	6.86	Not Found	High	Not Found	Not Found	Not Found	Not Found			0.01			200					0.059	0	1.8	1	30	1
FALSE	High	IsMasterProtein	ch11u_Q9UMS4	Pre-mRNA-processing factor 19 OS=Homo sapiens GN=PRPF19 PE=1 SV=1	0.002	2.053	2.38095	1	2	1	1	504	55.1	6.61	Not Found	Not Found	High	Not Found	Not Found	Not Found				0.01			200				0.105	0	2.26	1	15	1
FALSE	High	IsMasterProtein	A0A140VKC8	Testis tissue sperm-binding protein Li 45a OS=Homo sapiens PE=2 SV=1	0.002	1.997	5.919	1	2	1	1	321	35.9	6.6	Not Found	Not Found	Not Found	Not Found	Not Found	Not Found											0.129	0	0	1	0	1
FALSE	High	IsMasterProtein	ch05u_Q9Y6G5	COMM domain-containing protein 10 OS=Homo sapiens GN=COMMD10 PE=1 SV=1	0.002	1.979	4.45545	1	1	1	1	202	23	6.54	High	Not Found	Not Found	Peak Found	Not Found	Not Found	Acetyl [N-Term]	0.508			132.7			67.3			0.194	0			14	1
FALSE	High	IsMasterProtein	A0A0F7G8J1	Plasminogen OS=Homo sapiens GN=PLG PE=2 SV=1	0.002	1.977	0.988875	1	6	1	1	809	90.6	7.36	High	High	High	Not Found	Not Found	Not Found		0.01	0.01	0.01	200	200	200				0.046	0	6.34	1	49	1
FALSE	High	IsMasterProtein	ch01u_P14324	Farnesyl pyrophosphate synthase OS=Homo sapiens GN=FDPS PE=1 SV=4	0.002	1.941	2.38663	1	2	1	1	419	48.2	6.15	Not Found	Not Found	Peak Found	Not Found	Not Found	High				0.923			104			96	0.105	0	0	1	0	1
FALSE	High	IsMasterProtein	ch18i_J3QRS3	Myosin regulatory light chain 12A OS=Homo sapiens GN=MYL12A PE=1 SV=1	0.002	1.921	5.64972	1	2	1	1	177	20.4	4.75	High	Not Found	Not Found	Peak Found	Not Found	Not Found		0.137			175.9			24.1			0.212	0	0	1	27	1
FALSE	High	IsMasterProtein	O00339	Matrilin-2 OS=Homo sapiens GN=MATN2 PE=1 SV=4	0.002	1.896	1.46444	1	4	1	1	956	106.8	6.27	Not Found	Not Found	Not Found	High	High	Not Found		100	100					200	200		0.049	0	4.67	1	15	1
FALSE	High	IsMasterProtein	A0A024QYW3	Proteolipid protein 2 (Colonic epithelium-enriched), isoform CRA_a OS=Homo sapiens GN=PLP2 PE=4 SV=1	0.002	1.892	8.55263	1	6	1	1	152	16.7	7.24	Not Found	Not Found	Not Found	Not Found	Not Found	Not Found											0.468	0	7.44	1	103	1
FALSE	High	IsMasterProtein	Q9BQA1	Methylosome protein 50 OS=Homo sapiens GN=WDR77 PE=1 SV=1	0.002	1.886	2.04678	1	6	1	1	342	36.7	5.17	High	High	High	Peak Found	Not Found	Peak Found		0.194		0.183	167.6		169.1	32.4		30.9	0.179	0	0	1	40	1
FALSE	High	IsMasterProtein	Q59GQ0	Actin related protein 2/3 complex subunit 1A variant (Fragment) OS=Homo sapiens PE=2 SV=1	0.002	1.874	2.99252	1	2	1	1	401	45	8.6	High	Not Found	Not Found	Not Found	Not Found	Not Found		0.01			200						0.093	0	0	1	25	1
FALSE	High	IsMasterProtein	I4EPH7	MHC class II antigen (Fragment) OS=Homo sapiens GN=HLA-DQB1 PE=3 SV=1	0.002	1.87	11.4754	1	5	1	1	183	21.4	7.46	Not Found	Not Found	Not Found	Not Found	Not Found	Not Found											0.233	0	5.22	1	0	1
FALSE	High	IsMasterProtein	ch17i_Q7KZ85	Transcription elongation factor SPT6 OS=Homo sapiens GN=SUPT6H PE=1 SV=2	0.002	1.867	0.579374	1	10	1	1	1726	198.9	4.91	High	High	High	Not Found	Not Found	Not Found		0.01	0.01	0.01	200	200	200				0.025	0	8.77	1	36	1
FALSE	High	IsMasterProtein	Q53FR9	COMM domain containing 9 variant (Fragment) OS=Homo sapiens GN=COMMD9 PE=2 SV=1	0.002	1.866	6.06061	1	3	1	1	198	21.8	5.88	Not Found	High	High	Not Found	Peak Found	Not Found			0.218			164.2			35.8		0.212	0	0	1	0	1
FALSE	High	IsMasterProtein	B3KP31	cDNA FLJ31047 fis, clone HSYRA2000424, highly similar to Carbohydrate kinase-like protein (EC 2.7.1.-) OS=Homo sapiens PE=2 SV=1	0.002	1.844	3.13808	1	3	1	1	478	51.5	6.83	High	Not Found	Not Found	Not Found	Not Found	Not Found		0.01			200						0.105	0	2.02	1	0	1
FALSE	High	IsMasterProtein	P16298-4	Isoform 4 of Serine/threonine-protein phosphatase 2B catalytic subunit beta isoform OS=Homo sapiens GN=PPP3CB	0.002	1.829	2.28571	1	2	1	1	525	59.1	5.91	Not Found	High	Not Found	Not Found	Not Found	Not Found											0.083	0	1.66	1	0	1
FALSE	High	IsMasterProtein	Q2MCL6	Large neutral amino acids transporter 1 (Fragment) OS=Homo sapiens GN=SLC7A5 PE=4 SV=1	0.002	1.823	25.3521	1	2	1	1	71	7.2	5.31	Not Found	Not Found	Not Found	Not Found	Not Found	Not Found											0.778	0	1.72	1	0	1
FALSE	High	IsMasterProtein	A8K7S5	Katanin p60 ATPase-containing subunit A1 OS=Homo sapiens GN=KATNA1 PE=2 SV=1	0.002	1.82	2.44399	1	4	1	1	491	55.9	6.9	High	Not Found	High	Not Found	Not Found	Not Found											0.072	0	5.01	1	44	1
FALSE	High	IsMasterProtein	ch19u_M0QYZ2	AP-2 complex subunit sigma OS=Homo sapiens GN=AP2S1 PE=1 SV=1	0.002	1.814	4.43038	1	2	1	1	158	18.9	7.81	Not Found	Not Found	High	Not Found	Not Found	Peak Found				0.169			171.1			28.9	0.334	0	0	1	24	1
FALSE	High	IsMasterProtein	ch05i_Q00765	Receptor expression-enhancing protein 5 OS=Homo sapiens GN=REEP5 PE=1 SV=3	0.002	1.792	5.29101	1	6	1	1	189	21.5	8.1	High	High	High	Peak Found	Not Found	Not Found		0.144	0.01		174.9	200		25.1			0.259	0	0	1	16	1
FALSE	High	IsMasterProtein	ch16i_A5YKK6	CCR4-NOT transcription complex subunit 1 OS=Homo sapiens GN=CNOT1 PE=1 SV=2	0.002	1.787	1.47306	1	1	1	1	2376	266.8	7.11	Not Found	Not Found	Not Found	Not Found	Not Found	Not Found											0.016	0			0	1
FALSE	High	IsMasterProtein	A8K8U7	cDNA FLJ78640, highly similar to Homo sapiens TSPY-like 2 (TSPYL2), mRNA OS=Homo sapiens PE=2 SV=1	0.002	1.785	1.0101	1	4	1	1	693	79.4	4.58	High	Not Found	High	Not Found	Not Found	Not Found				0.01			200				0.096	0	4.12	1	56	1
FALSE	High	IsMasterProtein	ch15i_Q7L5Y6-2	Isoform 2 of DET1 homolog OS=Homo sapiens GN=DET1	0.002	1.777	1.24777	1	4	1	1	561	65.1	7.71	High	High	High	Peak Found	Peak Found	Peak Found		0.132	0.127	0.126	176.6	177.5	177.7	23.4	22.5	22.3	0.072	0			77	1
FALSE	High	IsMasterProtein	ch05u_P62263	40S ribosomal protein S14 OS=Homo sapiens GN=RPS14 PE=1 SV=3	0.002	1.765	8.60927	1	4	1	1	151	16.3	10.05	Not Found	High	High	Not Found	Peak Found	Peak Found											0.389	0	0	1	30	1
FALSE	High	IsMasterProtein	ch06i_P15924	Desmoplakin OS=Homo sapiens GN=DSP PE=1 SV=3	0.002	1.726	0.243817	1	3	1	1	2871	331.6	6.81	High	High	Not Found	Not Found	Not Found	Not Found											0.011	0	0	1	0	1
FALSE	High	IsMasterProtein	Q8WVQ1	Soluble calcium-activated nucleotidase 1 OS=Homo sapiens GN=CANT1 PE=1 SV=1	0.002	1.726	1.49626	1	2	1	1	401	44.8	6.09	High	Not Found	Not Found	Peak Found	Not Found	Not Found											0.093	0	0	1	34	1
FALSE	High	IsMasterProtein	ch14u_Q9Y5K8	V-type proton ATPase subunit D OS=Homo sapiens GN=ATP6V1D PE=1 SV=1	0.002	1.722	6.47773	1	4	1	1	247	28.2	9.36	Not Found	Not Found	High	Not Found	Not Found	Not Found				0.01			200				0.179	0	0	1	29	1
FALSE	High	IsMasterProtein	ch14u_P62330	ADP-ribosylation factor 6 OS=Homo sapiens GN=ARF6 PE=1 SV=2	0.002	1.678	6.28571	1	6	1	1	175	20.1	8.95	High	High	High	Peak Found	Peak Found	Peak Found		0.313	0.455	0.375	152.3	137.5	145.5	47.7	62.5	54.5	0.292	0	0	1	52	1
FALSE	High	IsMasterProtein	ch20u_Q9HDC9	Adipocyte plasma membrane-associated protein OS=Homo sapiens GN=APMAP PE=1 SV=2	0.002	1.666	1.68269	1	9	1	1	416	46.5	6.16	High	High	High	Not Found	Not Found	Not Found		0.01	0.01	0.01	200	200	200				0.101	0	1.87	1	0	1
FALSE	High	IsMasterProtein	B4DID6	cDNA FLJ52545, highly similar to Dickkopf-related protein 3 OS=Homo sapiens PE=2 SV=1	0.002	1.666	2.74725	1	3	1	1	364	39.8	4.67	Not Found	Not Found	Not Found	High	Not Found	Not Found		100						200			0.136	0	1.71	1	28	1
FALSE	High	IsMasterProtein	ch05i_Q6ZUX7	Lipoma HMGIC fusion partner-like 2 protein OS=Homo sapiens GN=LHFPL2 PE=2 SV=2	0.002	1.661	10.9649	1	2	1	1	228	24.5	6.49	Not Found	Peak Found	Not Found	Not Found	High	Not Found			1.911			68.7			131.3		0.389	0	0	1	17	1
FALSE	High	IsMasterProtein	ch02i_P11234-2	Isoform 2 of Ras-related protein Ral-B OS=Homo sapiens GN=RALB	0.003	1.653	7.01754	1	2	1	1	228	26	7.81	Not Found	High	Not Found	Not Found	Not Found	Not Found			0.01			200					0.212	0	0	1	28	1
FALSE	High	IsMasterProtein	E9PGC5	Receptor-type tyrosine-protein phosphatase kappa OS=Homo sapiens GN=PTPRK PE=1 SV=1	0.003	1.652	0.815217	1	4	1	1	1472	165.9	5.91	High	Not Found	Not Found	Not Found	Not Found	Not Found											0.029	0	1.74	1	27	1
FALSE	High	IsMasterProtein	chXi_P57739	Claudin-2 OS=Homo sapiens GN=CLDN2 PE=1 SV=1	0.003	1.648	6.52174	1	4	1	1	230	24.5	8.16	Not Found	Not Found	Not Found	Not Found	Not Found	Not Found											0.292	0	0	1	25	1
FALSE	High	IsMasterProtein	B4DNB9	cDNA FLJ53069, highly similar to AP-2 complex subunit mu-1 OS=Homo sapiens PE=2 SV=1	0.003	1.645	2.3913	1	4	1	1	460	52.3	9.5	Not Found	High	High	Not Found	Peak Found	Not Found			0.308	0.01		152.9	200		47.1		0.077	0	0	1	0	1
FALSE	High	IsMasterProtein	P40189	Interleukin-6 receptor subunit beta OS=Homo sapiens GN=IL6ST PE=1 SV=2	0.003	1.644	1.85185	1	10	1	1	918	103.5	5.95	Not Found	Not Found	Not Found	Not Found	Not Found	Not Found											0.044	0	0	1	0	1
FALSE	High	IsMasterProtein	E5FF39	KRAS protein (Fragment) OS=Homo sapiens GN=KRAS PE=4 SV=1	0.003	1.644	33.3333	1	2	1	1	33	3.6	4.89	High	High	Not Found	Not Found	Peak Found	Not Found			0.173			170.5			29.5		2.162	0			0	1
FALSE	High	IsMasterProtein	ch03u_Q9UQN3	Charged multivesicular body protein 2b OS=Homo sapiens GN=CHMP2B PE=1 SV=1	0.003	1.642	4.69484	1	2	1	1	213	23.9	8.76	Not Found	High	Not Found	Not Found	Peak Found	Not Found			1.08			96.2			103.8		0.179	0	0	1	25	1
FALSE	High	IsMasterProtein	ch06i_P17987	T-complex protein 1 subunit alpha OS=Homo sapiens GN=TCP1 PE=1 SV=1	0.003	1.616	1.79856	1	2	1	1	556	60.3	6.11	Not Found	Not Found	High	Not Found	Not Found	Not Found				0.01			200				0.066	0	0	1
FALSE	High	IsMasterProtein	chXu_A0A0J9YXQ7	Dedicator of cytokinesis protein 11 (Fragment) OS=Homo sapiens GN=DOCK11 PE=1 SV=1	0.004	1.56	27.5	1	1	1	1	40	4.8	4.78	Not Found	High	Not Found	Not Found	Peak Found	Not Found			0.039			192.4			7.6		1.154	0			0	1
FALSE	High	IsMasterProtein	Q8WVX7	Ribosomal protein S19 (Fragment) OS=Homo sapiens PE=2 SV=1	0.004	1.552	5.73248	1	2	1	1	157	17.3	10.52	High	Not Found	Not Found	Peak Found	Not Found	Not Found		0.334			149.9			50.1			0.194	0	0	1	0	1
FALSE	High	IsMasterProtein	ch06u_P48506	Glutamate--cysteine ligase catalytic subunit OS=Homo sapiens GN=GCLC PE=1 SV=2	0.004	1.542	1.72684	1	2	1	1	637	72.7	6.09	High	Not Found	Not Found	Not Found	Not Found	Not Found		0.01			200						0.064	0	0	1	14	1
FALSE	High	IsMasterProtein	ch01u_P21291	Cysteine and glycine-rich protein 1 OS=Homo sapiens GN=CSRP1 PE=1 SV=3	0.004	1.497	7.77202	1	2	1	1	193	20.6	8.57	Not Found	Not Found	Not Found	Not Found	Not Found	Not Found											0.179	0	1.67	1	0	1
FALSE	High	IsMasterProtein	ch17u_P34896	Serine hydroxymethyltransferase, cytosolic OS=Homo sapiens GN=SHMT1 PE=1 SV=1	0.004	1.487	2.27743	1	4	1	1	483	53	7.71	High	High	Not Found	Not Found	Not Found	Not Found			0.01			200					0.077	0	3.69	1	16	1
FALSE	High	IsMasterProtein	ch10u_Q7LGC8	Carbohydrate sulfotransferase 3 OS=Homo sapiens GN=CHST3 PE=1 SV=3	0.004	1.474	3.34029	1	2	1	1	479	54.7	8.59	Not Found	Not Found	High	Not Found	Not Found	Peak Found				1.134			93.7			106.3	0.077	0	1.61	1	0	1
FALSE	High	IsMasterProtein	ch01i_P12270	Nucleoprotein TPR OS=Homo sapiens GN=TPR PE=1 SV=3	0.004	1.46	0.550148	1	4	1	1	2363	267.1	5.02	Not Found	Not Found	Not Found	Not Found	Not Found	Not Found											0.016	0	2.1	1	0	1
FALSE	High	IsMasterProtein	ch19u_Q9BXA6	Testis-specific serine/threonine-protein kinase 6 OS=Homo sapiens GN=TSSK6 PE=1 SV=1	0.004	1.458	11.3553	1	2	1	1	273	30.3	9.11	Not Found	Not Found	Not Found	Not Found	Not Found	Not Found											0.155	0	0	1	0	1
FALSE	High	IsMasterProtein	Unplacedu_Q5JXB2	Putative ubiquitin-conjugating enzyme E2 N-like OS=Homo sapiens GN=UBE2NL PE=1 SV=1	0.004	1.457	12.4183	1	2	1	1	153	17.4	5.92	Not Found	High	Not Found	Not Found	Not Found	Not Found											0.212	0	0	1	16	1
FALSE	High	IsMasterProtein	V9HW62	Lactoylglutathione lyase OS=Homo sapiens GN=HEL-S-74 PE=2 SV=1	0.004	1.456	3.80435	1	6	1	1	184	20.7	5.47	High	High	High	Not Found	Not Found	Not Found											0.212	0	0	1	0	1
FALSE	High	IsMasterProtein	ch03u_P12268	Inosine-5'-monophosphate dehydrogenase 2 OS=Homo sapiens GN=IMPDH2 PE=1 SV=2	0.005	1.417	2.14008	1	4	1	1	514	55.8	6.9	High	High	Not Found	Not Found	Not Found	Not Found		0.01	0.01		200	200					0.089	0	0	1	0	1
FALSE	High	IsMasterProtein	B2RB23	cDNA, FLJ95265, highly similar to Homo sapiens acetyl-Coenzyme A acyltransferase 2 (mitochondrial 3-oxoacyl-Coenzyme A thiolase) (ACAA2), nuclear gene encoding mitochondrial protein, mRNA OS=Homo sapiens PE=2 SV=1	0.009	1.405	4.03023	1	2	1	1	397	42	8.25	Not Found	Not Found	High	Not Found	Not Found	Not Found				0.01			200				0.105	0	0	1	0	1
FALSE	High	IsMasterProtein	Q6ZVA1	cDNA FLJ16001 fis, clone BRAWH2001395, moderately similar to MYELIN BASIC PROTEIN OS=Homo sapiens PE=2 SV=1	0.009	1.4	13.1944	1	2	1	1	144	15.1	9.73	Not Found	Not Found	Not Found	Not Found	Not Found	Not Found											0.389	0	0	1	0	1
FALSE	High	IsMasterProtein	ch04u_P43652	Afamin OS=Homo sapiens GN=AFM PE=1 SV=1	0.009	1.398	1.16861	1	16	1	1	599	69	5.9	High	High	High	Not Found	Not Found	Not Found		0.01	0.01	0.01	200	200	200				0.056	0	0	1	23	1
FALSE	High	IsMasterProtein	Q14103	Heterogeneous nuclear ribonucleoprotein D0 OS=Homo sapiens GN=HNRNPD PE=1 SV=1	0.01	1.376	3.94366	1	2	1	1	355	38.4	7.81	Not Found	Not Found	Not Found	Not Found	Not Found	Not Found											0.166	0	1.73	1	28	1
FALSE	High	IsMasterProtein	A0A087WUW9	ADP-ribosylation factor-like protein 15 OS=Homo sapiens GN=ARL15 PE=1 SV=1	0.01	1.373	5.88235	1	2	1	1	204	22.9	5.63	Not Found	High	Not Found	Not Found	Not Found	Not Found			0.01			200					0.194	0	0	1	13	1
FALSE	High	IsMasterProtein	ch17i_Q99615	DnaJ homolog subfamily C member 7 OS=Homo sapiens GN=DNAJC7 PE=1 SV=2	0.01	1.366	2.63158	1	3	1	1	494	56.4	6.96	Not Found	Not Found	Not Found	Not Found	Not Found	Not Found											0.064	0	0	1	0	1
FALSE	High	IsMasterProtein	ch11u_Q9P2F6	Rho GTPase-activating protein 20 OS=Homo sapiens GN=ARHGAP20 PE=1 SV=2	0.01	1.364	1.67926	1	3	1	1	1191	132.5	7.99	Not Found	Not Found	High	Not Found	Not Found	Not Found				0.01			200				0.039	0	0	1	0	1
FALSE	High	IsMasterProtein	P49247	Ribose-5-phosphate isomerase OS=Homo sapiens GN=RPIA PE=1 SV=3	0.01	1.36	2.57235	1	4	1	1	311	33.2	8.54	Not Found	High	High	Not Found	Not Found	Not Found			0.01	0.01		200	200				0.122	0	3.46	1	28	1
FALSE	High	IsMasterProtein	B3KPC7	Actin-related protein 2/3 complex subunit 5 OS=Homo sapiens PE=2 SV=1	0.01	1.36	7.84314	1	4	1	1	153	17	6.02	High	High	Not Found	Not Found	Not Found	Not Found											0.233	0	3.33	1	28	1
FALSE	High	IsMasterProtein	ch07i_O75128-2	Isoform 2 of Protein cordon-bleu OS=Homo sapiens GN=COBL	0.01	1.352	0.595681	1	6	1	1	1343	143.8	7.42	Peak Found	Peak Found	Peak Found	High	High	High		3.716	3.961	3.82	42.4	40.3	41.5	157.6	159.7	158.5	0.031	0	5.88	1	59	1
FALSE	High	IsMasterProtein	M0QXU3	Zinc finger protein 28 OS=Homo sapiens GN=ZNF28 PE=4 SV=1	0.01	1.349	10.8527	1	2	1	1	129	15.4	8.66	High	Not Found	Not Found	Not Found	Not Found	Not Found		0.01			200						0.259	0	0	1	0	1
FALSE	Medium	IsMasterProtein	B2R4C0	60S ribosomal protein L18a OS=Homo sapiens PE=2 SV=1	0.011	1.309	7.38636	1	2	1	1	176	20.7	10.71	Not Found	High	Not Found	Not Found	Not Found	Not Found			0.01			200					0.179	0	0	1	17	1
FALSE	Medium	IsMasterProtein	B2RAY1	cDNA, FLJ95184, highly similar to Homo sapiens signal transducing adaptor molecule (SH3 domain and ITAM motif) 1 (STAM), mRNA OS=Homo sapiens PE=2 SV=1	0.011	1.308	1.2963	1	2	1	1	540	59.1	4.84	Not Found	High	Not Found	Not Found	Not Found	Not Found			0.01			200					0.11	0	0	1	39	1
FALSE	Medium	IsMasterProtein	C4B7M4	Spatacsin OS=Homo sapiens GN=SPG11 PE=2 SV=1	0.011	1.289	0.450266	1	2	1	1	2443	278.7	5.97	Not Found	Not Found	High	Not Found	Not Found	Not Found				0.01			200				0.016	0	0	1	0	1
FALSE	Medium	IsMasterProtein	F4NBW3	MHC class I antigen (Fragment) OS=Homo sapiens GN=HLA-B PE=3 SV=1	0.011	1.272	6.84524	1	3	1	1	336	38	6.86	Not Found	Not Found	Not Found	Not Found	Not Found	Not Found											0.116	0	2.09	1	0	1
FALSE	Medium	IsMasterProtein	ch09i_Q12986	Transcriptional repressor NF-X1 OS=Homo sapiens GN=NFX1 PE=1 SV=2	0.011	1.27	1.25	1	2	1	1	1120	124.3	8.24	Not Found	Not Found	Not Found	Not Found	Not Found	Not Found											0.034	0	0	1	0	1
FALSE	Medium	IsMasterProtein	ch17i_I3L504	Eukaryotic translation initiation factor 5A-1 OS=Homo sapiens GN=EIF5A PE=1 SV=1	0.013	1.25	6.45161	1	2	1	1	186	20.5	5.25	Not Found	High	Not Found	Not Found	Peak Found	Not Found			0.339			149.4			50.6		0.292	0	0	1	14	1
FALSE	Medium	IsMasterProtein	A4QPB0	IQ motif containing GTPase activating protein 1 OS=Homo sapiens GN=IQGAP1 PE=1 SV=1	0.013	1.25	1.0863	1	2	1	1	1657	189.2	6.48	Not Found	High	Not Found	Not Found	Not Found	Not Found			0.01			200					0.025	0	0	1	0	1
FALSE	Medium	IsMasterProtein	A0A140VKE9	Testis tissue sperm-binding protein Li 66n OS=Homo sapiens PE=2 SV=1	0.013	1.234	3.29154	1	1	1	1	638	71.4	5.2	Not Found	High	Not Found	Not Found	Not Found	Not Found			0.01			200					0.086	0			38	1
FALSE	Medium	IsMasterProtein	Q09MP3	RAD51-associated protein 2 OS=Homo sapiens GN=RAD51AP2 PE=1 SV=1	0.013	1.231	0.949094	1	2	1	1	1159	133.8	7.34	High	Not Found	Not Found	Not Found	Not Found	Not Found		0.01			200						0.031	0	0	1	15	1
FALSE	Medium	IsMasterProtein	B0AZS5	Kinesin-like protein OS=Homo sapiens PE=2 SV=1	0.013	1.229	2.87879	1	5	1	1	660	75	6.4	Not Found	High	High	Not Found	Not Found	Not Found			0.01	0.01		200	200				0.055	0	2.2	1	0	1
FALSE	Medium	IsMasterProtein	ch01u_P37802	Transgelin-2 OS=Homo sapiens GN=TAGLN2 PE=1 SV=3	0.013	1.221	5.52764	1	2	1	1	199	22.4	8.25	Not Found	High	High	Not Found	Peak Found	Peak Found	Acetyl [N-Term]		0.186	0.127		168.7	177.4		31.3	22.6	0.179	0			15	1
FALSE	Medium	IsMasterProtein	ch19i_V9GZ56	U6 snRNA-associated Sm-like protein LSm4 (Fragment) OS=Homo sapiens GN=LSM4 PE=1 SV=1	0.013	1.218	2.94118	1	3	1	1	238	25.7	10.15	High	High	High	Not Found	Not Found	Not Found		0.01	0.01	0.01	200	200	200				0.155	0			0	1
FALSE	Medium	IsMasterProtein	ch19i_Q12906-7	Isoform 7 of Interleukin enhancer-binding factor 3 OS=Homo sapiens GN=ILF3	0.013	1.216	1.22494	1	2	1	1	898	95.7	8.81	Not Found	Not Found	High	Not Found	Not Found	Not Found				0.01			200				0.051	0	2.07	1	0	1
FALSE	Medium	IsMasterProtein	Q05DH5	EXTL2 protein (Fragment) OS=Homo sapiens GN=EXTL2 PE=2 SV=1	0.013	1.211	3.92749	1	1	1	1	331	37.6	9.14	Not Found	Peak Found	Not Found	Not Found	High	Not Found			1.362			84.7			115.3		0.145	0	0	1
FALSE	Medium	IsMasterProtein	A0A0K0K1H8	Epididymis secretory sperm binding protein Li 71p OS=Homo sapiens GN=HEL-S-71p PE=2 SV=1	0.014	1.206	2.00573	1	3	1	1	698	77	7.21	Not Found	Not Found	Not Found	Not Found	Not Found	Not Found											0.053	0	4.71	1	15	1
FALSE	Medium	IsMasterProtein	ch17u_Q15276	Rab GTPase-binding effector protein 1 OS=Homo sapiens GN=RABEP1 PE=1 SV=2	0.014	1.193	2.66821	1	1	1	1	862	99.2	5.01	Not Found	Not Found	Not Found	Not Found	Not Found	Not Found											0.037	0	0	1
FALSE	Medium	IsMasterProtein	ch11u_Q96PE2	Rho guanine nucleotide exchange factor 17 OS=Homo sapiens GN=ARHGEF17 PE=1 SV=1	0.014	1.192	0.387785	1	2	1	1	2063	221.5	6.29	High	Not Found	Not Found	Not Found	Not Found	Not Found		0.01			200						0.022	0	0	1	0	1
FALSE	Medium	IsMasterProtein	A8K556	cDNA FLJ78217 OS=Homo sapiens PE=2 SV=1	0.014	1.185	1.68067	1	6	1	1	357	40.3	8.15	High	High	High	Peak Found	Peak Found	Peak Found		0.418	0.395	0.412	141	143.3	141.6	59	56.7	58.4	0.166	0	0	1	44	1
FALSE	Medium	IsMasterProtein	ch04u_Q9ULE4	Protein FAM184B OS=Homo sapiens GN=FAM184B PE=2 SV=3	0.014	1.181	1.41509	1	4	1	1	1060	121	6.18	Not Found	High	Not Found	Not Found	Not Found	Not Found			0.01			200					0.029	0	1.69	1	21	1
FALSE	Medium	IsMasterProtein	ch03u_C9JF17	Apolipoprotein D (Fragment) OS=Homo sapiens GN=APOD PE=1 SV=1	0.014	1.18	2.7907	1	5	1	1	215	24.1	5.6	High	High	High	Not Found	Not Found	Not Found		0.01		0.01	200		200				0.212	0	0	1	0	1
FALSE	Medium	IsMasterProtein	ch08i_Q6NT76-5	Isoform 5 of Homeobox-containing protein 1 OS=Homo sapiens GN=HMBOX1	0.014	1.18	1.3544	1	5	1	1	443	49.8	5.76	High	High	High	Not Found	Not Found	Not Found											0.096	0	0	1	0	1
FALSE	Medium	IsMasterProtein	ch01i_O95297	Myelin protein zero-like protein 1 OS=Homo sapiens GN=MPZL1 PE=1 SV=1	0.014	1.166	4.83271	1	1	1	1	269	29.1	8.72	Not Found	High	Not Found	Not Found	Not Found	Not Found			0.01			200					0.194	0			0	1
FALSE	Medium	IsMasterProtein	P28065	Proteasome subunit beta type-9 OS=Homo sapiens GN=PSMB9 PE=1 SV=2	0.014	1.164	4.10959	1	7	1	1	219	23.3	5.03	High	High	High	Peak Found	Peak Found	Peak Found		0.118	0.091	0.106	178.9	183.2	180.8	21.1	16.8	19.2	0.233	0	1.76	1	15	1
FALSE	Medium	IsMasterProtein	Q9UI42	Carboxypeptidase A4 OS=Homo sapiens GN=CPA4 PE=1 SV=2	0.015	1.158	2.61283	1	2	1	1	421	47.3	6.7	Not Found	Not Found	Not Found	Not Found	Not Found	Not Found											0.105	0	0	1	0	1
FALSE	Medium	IsMasterProtein	A8K6Q3	cDNA FLJ75880, highly similar to Homo sapiens synaptic vesicle glycoprotein 2A (SV2A), mRNA OS=Homo sapiens PE=2 SV=1	0.015	1.152	2.15633	1	2	1	1	742	82.6	5.5	Not Found	Not Found	Not Found	Not Found	Not Found	Not Found											0.072	0			0	1
FALSE	Medium	IsMasterProtein	ch05u_Q9H2T7	Ran-binding protein 17 OS=Homo sapiens GN=RANBP17 PE=2 SV=1	0.015	1.148	0.919118	1	1	1	1	1088	124.3	6.44	Not Found	Not Found	Not Found	Not Found	Not Found	Not Found											0.038	0			0	1
FALSE	Medium	IsMasterProtein	P02743	Serum amyloid P-component OS=Homo sapiens GN=APCS PE=1 SV=2	0.015	1.146	2.69058	1	6	1	1	223	25.4	6.54	High	High	High	Not Found	Not Found	Not Found		0.01	0.01	0.01	200	200	200				0.233	0	0	1	23	1
FALSE	Medium	IsMasterProtein	ch01i_P02545	Prelamin-A/C OS=Homo sapiens GN=LMNA PE=1 SV=1	0.015	1.144	1.50602	1	4	1	1	664	74.1	7.02	High	Not Found	High	Not Found	Not Found	Not Found				0.01			200				0.053	0	5.46	1	28	1
FALSE	Medium	IsMasterProtein	ch12u_Q9UL25	Ras-related protein Rab-21 OS=Homo sapiens GN=RAB21 PE=1 SV=3	0.015	1.143	4.44444	1	2	1	1	225	24.3	7.94	High	Not Found	Not Found	Peak Found	Not Found	Not Found		0.265			158.2			41.8			0.166	0	0	1	0	1
FALSE	Medium	IsMasterProtein	Q06323-2	Isoform 2 of Proteasome activator complex subunit 1 OS=Homo sapiens GN=PSME1	0.015	1.141	4	1	1	1	1	250	28.6	6.71	Not Found	Not Found	High	Not Found	Not Found	Not Found											0.129	0	0	1
FALSE	Medium	IsMasterProtein	Q8NE71	ATP-binding cassette sub-family F member 1 OS=Homo sapiens GN=ABCF1 PE=1 SV=2	0.015	1.141	1.6568	1	1	1	1	845	95.9	6.8	High	Not Found	Not Found	Not Found	Not Found	Not Found											0.05	0			0	1
FALSE	Medium	IsMasterProtein	Q6P9F7	Volume-regulated anion channel subunit LRRC8B OS=Homo sapiens GN=LRRC8B PE=1 SV=2	0.016	1.123	1.4944	1	2	1	1	803	92.3	6.86	Not Found	Not Found	Not Found	High	Not Found	Not Found		100						200			0.058	0	0	1
FALSE	Medium	IsMasterProtein	Q5M9N0	Coiled-coil domain-containing protein 158 OS=Homo sapiens GN=CCDC158 PE=2 SV=2	0.016	1.123	0.898473	1	4	1	1	1113	127.1	6.46	Not Found	High	Not Found	Not Found	Not Found	Not Found			0.01			200					0.028	0	0	1	0	1
FALSE	Medium	IsMasterProtein	Q8N3F8	MICAL-like protein 1 OS=Homo sapiens GN=MICALL1 PE=1 SV=2	0.016	1.12	1.854	1	1	1	1	863	93.4	7.25	Not Found	Not Found	Not Found	Not Found	Not Found	Not Found											0.049	0			0	1
FALSE	Medium	IsMasterProtein	B2R928	Mitogen-activated protein kinase kinase kinase kinase OS=Homo sapiens PE=2 SV=1	0.016	1.119	3.6643	1	2	1	1	846	95	7.74	Not Found	High	Not Found	Not Found	Not Found	Not Found											0.047	0			0	1
FALSE	Medium	IsMasterProtein	A2VCL2	Coiled-coil domain-containing protein 162 OS=Homo sapiens GN=CCDC162P PE=2 SV=3	0.016	1.118	1.4333	1	4	1	1	907	103.8	7.9	Not Found	High	Not Found	Not Found	Not Found	Not Found			0.01			200					0.044	0	0	1	0	1
FALSE	Medium	IsMasterProtein	Q96SE7-2	Isoform 2 of Zinc finger protein 347 OS=Homo sapiens GN=ZNF347	0.016	1.115	3.57143	1	2	1	1	840	95.8	9.17	High	High	Not Found	Not Found	Not Found	Not Found		0.01	0.01		200	200					0.038	0	5.19	1
FALSE	Medium	IsMasterProtein	B3KT21	cDNA FLJ37476 fis, clone BRAWH2012827, highly similar to Homo sapiens BH3 interacting domain death agonist (BID), transcript variant 1, mRNA OS=Homo sapiens PE=2 SV=1	0.016	1.107	5.39419	1	2	1	1	241	26.8	7.08	Not Found	Not Found	High	Not Found	Not Found	Peak Found											0.212	0	0	1	0	1
FALSE	Medium	IsMasterProtein	ch06i_A0A075B6F3	Dynein heavy chain 8, axonemal OS=Homo sapiens GN=DNAH8 PE=1 SV=2	0.016	1.104	0.297429	1	2	1	1	4707	538.3	6.13	Not Found	Not Found	High	Not Found	Not Found	Not Found				0.01			200				0.008	0	0	1	18	1
FALSE	Medium	IsMasterProtein	ch19i_E7ESW6	WD repeat-containing protein 87 OS=Homo sapiens GN=WDR87 PE=1 SV=2	0.016	1.092	0.274725	1	2	1	1	2912	337.6	7.25	Not Found	Not Found	Not Found	Not Found	Not Found	Not Found											0.013	0			0	1
FALSE	Medium	IsMasterProtein	ch05u_P62495	Eukaryotic peptide chain release factor subunit 1 OS=Homo sapiens GN=ETF1 PE=1 SV=3	0.017	1.071	2.28833	1	2	1	1	437	49	5.71	Not Found	Not Found	Not Found	Not Found	Not Found	Not Found											0.089	0	1.8	1	0	1
FALSE	Medium	IsMasterProtein	ch03i_P26022	Pentraxin-related protein PTX3 OS=Homo sapiens GN=PTX3 PE=1 SV=3	0.017	1.07	2.62467	1	2	1	1	381	41.9	5.01	High	Not Found	Not Found	Not Found	Not Found	Not Found		0.01			200						0.136	0	1.72	1	0	1
FALSE	Medium	IsMasterProtein	ch11i_Q8NHG7	Small VCP/p97-interacting protein OS=Homo sapiens GN=SVIP PE=1 SV=1	0.017	1.056	14.2857	1	2	1	1	77	8.4	8.91	Not Found	High	Not Found	Not Found	Not Found	Not Found											0.778	0	0	1	14	1
FALSE	Medium	IsMasterProtein	ch10i_O94907	Dickkopf-related protein 1 OS=Homo sapiens GN=DKK1 PE=1 SV=1	0.017	1.056	3.7594	1	1	1	1	266	28.7	8.4	Not Found	Not Found	Not Found	Not Found	Not Found	Not Found											0.145	0			26	1
FALSE	Medium	IsMasterProtein	ch01i_A0A087WX67	TAR DNA-binding protein 43 (Fragment) OS=Homo sapiens GN=TARDBP PE=1 SV=1	0.017	1.047	7.38255	1	2	1	1	149	17.1	7.37	Not Found	Not Found	Not Found	Not Found	Not Found	Not Found	Acetyl [N-Term]										0.334	0			0	1
FALSE	Medium	IsMasterProtein	Q14019	Coactosin-like protein OS=Homo sapiens GN=COTL1 PE=1 SV=3	0.017	1.044	4.22535	1	3	1	1	142	15.9	5.67	Not Found	High	High	Not Found	Peak Found	Not Found			0.073	0.01		186.3	200		13.7		0.259	0	0	1	0	1
FALSE	Medium	IsMasterProtein	A8MUS3	60S ribosomal protein L23a OS=Homo sapiens GN=RPL23A PE=1 SV=1	0.017	1.039	6.70103	1	2	1	1	194	21.9	10.48	Not Found	High	Not Found	Not Found	Not Found	Not Found											0.233	0	0	1	0	1
FALSE	Medium	IsMasterProtein	ch04i_Q9UBK2-3	Isoform B5 of Peroxisome proliferator-activated receptor gamma coactivator 1-alpha OS=Homo sapiens GN=PPARGC1A	0.017	1.032	1.1208	1	2	1	1	803	91.7	6.24	High	Not Found	High	Not Found	Not Found	Not Found		0.01			200						0.058	0			0	1
FALSE	Medium	IsMasterProtein	P06132	Uroporphyrinogen decarboxylase OS=Homo sapiens GN=UROD PE=1 SV=2	0.017	1.024	1.63488	1	2	1	1	367	40.8	6.14	High	Not Found	High	Not Found	Not Found	Not Found		0.01		0.01	200		200				0.129	0			36	1
FALSE	Medium	IsMasterProtein	B7Z235	cDNA FLJ52623 OS=Homo sapiens PE=2 SV=1	0.019	1.004	3.06122	1	2	1	1	196	21.1	11.12	High	Not Found	Not Found	Not Found	Not Found	Not Found		0.01			200						0.194	0	0	1	0	1
FALSE	Medium	IsMasterProtein	ch11i_H0Y677	Tyrosine 3-monooxygenase (Fragment) OS=Homo sapiens GN=TH PE=1 SV=1	0.02	0.973	12.069	1	3	1	1	116	13.1	4.93	High	High	High	Not Found	Not Found	Not Found	Acetyl [N-Term]	0.01	0.01	0.01	200	200	200				0.334	0			29	1
FALSE	Medium	IsMasterProtein	Q5TBA9	Protein furry homolog OS=Homo sapiens GN=FRY PE=1 SV=1	0.02	0.969	0.199137	1	6	1	1	3013	338.7	5.99	High	High	High	Not Found	Not Found	Not Found		0.01	0.01	0.01	200	200	200				0.013	0	0	1	0	1

## Sheet: Nx_EVs_Sorted
Checked	Protein FDR Confidence	Master	Accession	Description	Exp. q-value	Sum PEP Score	Coverage	# Peptides	# PSMs	# Unique Peptides	# Protein Groups	# AAs	MW [kDa]	calc. pI	Found in Sample: [S13] F7: Light, Control	Found in Sample: [S15] F9: Light, Control	Found in Sample: [S14] F8: Light, Control	Found in Sample: [S16] F7: Heavy, Sample	Found in Sample: [S18] F9: Heavy, Sample	Found in Sample: [S17] F8: Heavy, Sample	Modifications	Abundance Ratio: (F7, Heavy) / (F7, Light)	Abundance Ratio: (F9, Heavy) / (F9, Light)	Abundance Ratio: (F8, Heavy) / (F8, Light)	Average H/L	Abundances (Scaled): F7: Light, Control	Abundances (Scaled): F9: Light, Control	Abundances (Scaled): F8: Light, Control	Abundances (Scaled): F7: Heavy, Sample	Abundances (Scaled): F9: Heavy, Sample	Abundances (Scaled): F8: Heavy, Sample	emPAI	# Razor Peptides	Score Sequest HT	# Peptides Sequest HT	Score Mascot	# Peptides Mascot
FALSE	High	IsMasterProtein	P06865	Beta-hexosaminidase subunit alpha OS=Homo sapiens GN=HEXA PE=1 SV=2	0	85.462	26.276	11	84	1	1	529	60.7	5.16	Not Found	Not Found	Not Found	High	High	Not Found		100			100				200			2.594	0	99.42	11	1201	11
FALSE	High	IsMasterProtein	ch01i_Q8NBP7	Proprotein convertase subtilisin/kexin type 9 OS=Homo sapiens GN=PCSK9 PE=1 SV=3	0	68.559	11.8497	5	60	5	1	692	74.2	6.61	Peak Found	Not Found	Peak Found	High	High	High		100	100	100	100	1.6		0.8	198.4	200	199.2	0.931	0	95.03	5	1209	5
FALSE	High	IsMasterProtein	A7LFP5	Beta-mannosidase OS=Homo sapiens GN=MANBA PE=2 SV=1	0	30.554	8.98749	7	22	7	1	879	100.8	5.68	Not Found	Not Found	Not Found	High	High	High		100	100	100	100				200	200	200	0.442	0	22.97	7	326	7
FALSE	High	IsMasterProtein	ch04u_Q9Y2E5	Epididymis-specific alpha-mannosidase OS=Homo sapiens GN=MAN2B2 PE=1 SV=4	0	24.709	8.02775	6	11	6	1	1009	113.9	7.24	Not Found	Not Found	Not Found	High	High	High		100	100	100	100				200	200	200	0.359	0	9.38	6	107	5
FALSE	High	IsMasterProtein	ch16u_P08253	72 kDa type IV collagenase OS=Homo sapiens GN=MMP2 PE=1 SV=2	0	21.751	6.81818	3	16	3	1	660	73.8	5.47	Not Found	Not Found	Not Found	High	High	High		100	100	100	100				200	200	200	0.189	0	21.65	3	501	3
FALSE	High	IsMasterProtein	A6XNE2	Complement factor D preproprotein OS=Homo sapiens PE=2 SV=1	0	17.219	25	3	6	3	1	260	27.8	7.25	Not Found	Not Found	Not Found	High	Not Found	High		100		100	100				200		200	0.638	0	6.6	3	115	3
FALSE	High	IsMasterProtein	ch02i_X5D2Q8	Neuropilin 2 isoform A (Fragment) OS=Homo sapiens GN=NRP2 PE=1 SV=1	0	16.655	4.7261	3	8	3	1	931	104.8	5.17	Not Found	Not Found	Not Found	High	High	High		100	100	100	100				200	200	200	0.124	0	11.31	3	177	3
FALSE	High	IsMasterProtein	A0A024R2W4	Dystroglycan 1 (Dystrophin-associated glycoprotein 1), isoform CRA_a OS=Homo sapiens GN=DAG1 PE=4 SV=1	0	16.278	4.13408	2	10	2	1	895	97.5	8.56	Not Found	Not Found	Not Found	High	High	High		100	100	100	100				200	200	200	0.096	0	16.12	2	181	2
FALSE	High	IsMasterProtein	A0A087X117	Nodal modulator 1 OS=Homo sapiens GN=NOMO1 PE=1 SV=1	0	14.823	3.07814	3	12	3	1	1267	139.4	5.85	Not Found	Not Found	Not Found	High	High	High				100	100						200	0.098	0	14.99	3	168	3
FALSE	High	IsMasterProtein	B7Z351	Secreted phosphoprotein 1 variant 6 OS=Homo sapiens GN=SPP1 PE=2 SV=1	0	14.238	11.9266	3	22	3	1	327	37.2	4.73	Not Found	Not Found	Not Found	High	High	High		100	100	100	100				200	200	200	0.701	0	27.52	2	770	3
FALSE	High	IsMasterProtein	P08833	Insulin-like growth factor-binding protein 1 OS=Homo sapiens GN=IGFBP1 PE=1 SV=1	0	10.225	11.583	2	5	2	1	259	27.9	5.19	Not Found	Not Found	Not Found	Not Found	High	High			100		100					200		0.425	0	2.7	2	55	2
FALSE	High	IsMasterProtein	ch06i_Q99715	Collagen alpha-1(XII) chain OS=Homo sapiens GN=COL12A1 PE=1 SV=2	0	8.461	1.01208	2	4	2	1	3063	332.9	5.53	Not Found	Not Found	Not Found	Not Found	High	Not Found			100		100					200		0.028	0	4.52	2	64	2
FALSE	High	IsMasterProtein	O76061	Stanniocalcin-2 OS=Homo sapiens GN=STC2 PE=1 SV=1	0	8.006	5.62914	1	6	1	1	302	33.2	7.3	Not Found	Not Found	Not Found	High	High	High		100	100	100	100				200	200	200	0.166	0	10.59	1	175	1
FALSE	High	IsMasterProtein	Q9C0H2-4	Isoform 4 of Protein tweety homolog 3 OS=Homo sapiens GN=TTYH3	0	7.464	2.6616	1	2	1	1	526	57.9	5.31	Not Found	Not Found	Not Found	High	Not Found	Not Found		100			100				200			0.11	0	2.07	1	62	1
FALSE	High	IsMasterProtein	ch01i_P50897	Palmitoyl-protein thioesterase 1 OS=Homo sapiens GN=PPT1 PE=1 SV=1	0	6.957	4.90196	1	6	1	1	306	34.2	6.52	Not Found	Not Found	Not Found	High	High	High		100	100	100	100				200	200	200	0.166	0	8.05	1	119	1
FALSE	High	IsMasterProtein	ch22u_Q9NYQ6	Cadherin EGF LAG seven-pass G-type receptor 1 OS=Homo sapiens GN=CELSR1 PE=1 SV=1	0	6.801	0.564035	1	4	1	1	3014	329.3	5.92	Not Found	Not Found	Not Found	High	High	Not Found		100	100		100				200	200		0.015	0	6.43	1	131	1
FALSE	High	IsMasterProtein	A0A024R1D7	Galactose-3-O-sulfotransferase 1, isoform CRA_a OS=Homo sapiens GN=GAL3ST1 PE=4 SV=1	0	6.175	2.83688	1	6	1	1	423	48.7	8.62	Not Found	Not Found	Not Found	High	High	High		100	100	100	100				200	200	200	0.089	0	6.9	1	119	1
FALSE	High	IsMasterProtein	ch09i_P02760	Protein AMBP OS=Homo sapiens GN=AMBP PE=1 SV=1	0	5.761	5.68182	2	8	2	1	352	39	6.25	Not Found	Not Found	Not Found	High	High	High		100	100		100				200	200		0.292	0	5.75	2	68	2
FALSE	High	IsMasterProtein	ch12u_P24592	Insulin-like growth factor-binding protein 6 OS=Homo sapiens GN=IGFBP6 PE=1 SV=1	0	5.452	5.41667	1	6	1	1	240	25.3	7.81	Not Found	Not Found	Not Found	High	High	High		100	100	100	100				200	200	200	0.194	0	7.97	1	45	1
FALSE	High	IsMasterProtein	B3KQS9	cDNA PSEC0141 fis, clone PLACE1005913, highly similar to Deoxyribonuclease-2-alpha (EC 3.1.22.1) OS=Homo sapiens PE=2 SV=1	0	5.289	6.94444	2	10	2	1	360	39.5	8.05	Not Found	Not Found	Not Found	High	Not Found	High		100		100	100				200		200	0.311	0	11.79	2	78	2
FALSE	High	IsMasterProtein	Q8NCC3	Group XV phospholipase A2 OS=Homo sapiens GN=PLA2G15 PE=1 SV=2	0.001	3.885	2.6699	1	2	1	1	412	46.6	6.73	Not Found	Not Found	Not Found	Not Found	High	Not Found			100		100					200		0.105	0	2.03	1	41	1
FALSE	High	IsMasterProtein	G3V3D1	Epididymal secretory protein E1 (Fragment) OS=Homo sapiens GN=NPC2 PE=1 SV=1	0.002	2.26	7.23982	1	4	1	1	221	23.7	6.73	Not Found	Not Found	Not Found	High	High	Not Found		100	100		100				200	200		0.233	0	0	1	37	1
FALSE	High	IsMasterProtein	P09237	Matrilysin OS=Homo sapiens GN=MMP7 PE=1 SV=1	0.002	2.063	4.11985	1	4	1	1	267	29.7	7.91	Not Found	Not Found	Not Found	High	Not Found	High				100	100						200	0.194	0	0	1	19	1
FALSE	High	IsMasterProtein	O00339	Matrilin-2 OS=Homo sapiens GN=MATN2 PE=1 SV=4	0.002	1.896	1.46444	1	4	1	1	956	106.8	6.27	Not Found	Not Found	Not Found	High	High	Not Found		100	100		100				200	200		0.049	0	4.67	1	15	1
FALSE	High	IsMasterProtein	B4DID6	cDNA FLJ52545, highly similar to Dickkopf-related protein 3 OS=Homo sapiens PE=2 SV=1	0.002	1.666	2.74725	1	3	1	1	364	39.8	4.67	Not Found	Not Found	Not Found	High	Not Found	Not Found		100			100				200			0.136	0	1.71	1	28	1
FALSE	Medium	IsMasterProtein	Q6P9F7	Volume-regulated anion channel subunit LRRC8B OS=Homo sapiens GN=LRRC8B PE=1 SV=2	0.016	1.123	1.4944	1	2	1	1	803	92.3	6.86	Not Found	Not Found	Not Found	High	Not Found	Not Found		100			100				200			0.058	0	0	1
FALSE	High	IsMasterProtein	A0A024R962	HCG40889, isoform CRA_b OS=Homo sapiens GN=hCG_40889 PE=4 SV=1	0	62.882	14.3786	13	64	13	1	1231	139	6.62	Peak Found	Peak Found	Peak Found	High	High	High		92.015	99.543	73.77	88.4427	2.2	2	2.7	197.8	198	197.3	0.596	0	73.45	13	706	13
FALSE	High	IsMasterProtein	ch05u_Q08629	Testican-1 OS=Homo sapiens GN=SPOCK1 PE=1 SV=1	0	17.204	9.79499	4	22	4	1	439	49.1	6.1	Not Found	Peak Found	Not Found	High	High	High		100	39.177	100	79.7257		5		200	195	200	0.585	0	27.67	4	245	3
FALSE	High	IsMasterProtein	D3DQU2	Tripeptidyl peptidase I, isoform CRA_a OS=Homo sapiens GN=TPP1 PE=4 SV=1	0	58.184	26.9231	8	48	8	1	572	62.2	6.65	Peak Found	Peak Found	Not Found	High	High	High		60.087	74.298	100	78.1283	3.3	2.7		196.7	197.3	200	0.978	0	77.84	8	586	8
FALSE	High	IsMasterProtein	B7Z6Q5	Beta-galactosidase OS=Homo sapiens PE=2 SV=1	0	21.773	7.03448	4	30	4	1	725	81.8	7.94	High	Not Found	Peak Found	High	High	High		21.955	100	100	73.985	8.7		0.5	191.3	200	199.5	0.417	0	34.98	4	437	4
FALSE	High	IsMasterProtein	A0A024R8Q1	Glucosidase, alpha acid (Pompe disease, glycogen storage disease type II), isoform CRA_a OS=Homo sapiens GN=GAA PE=3 SV=1	0	35.184	8.5084	5	26	5	1	952	105.3	6	Not Found	Peak Found	Not Found	High	High	High		100	21.569	100	73.8563		8.9		200	191.1	200	0.389	0	42.01	5	275	5
FALSE	High	IsMasterProtein	P22304	Iduronate 2-sulfatase OS=Homo sapiens GN=IDS PE=1 SV=1	0	37.364	13.2727	3	14	3	1	550	61.8	5.45	Not Found	Not Found	Peak Found	High	High	High		100	100	17.3	72.4333			10.9	200	200	189.1	0.874	0	18.64	3	171	3
FALSE	High	IsMasterProtein	ch01i_Q9Y6R7	IgGFc-binding protein OS=Homo sapiens GN=FCGBP PE=1 SV=3	0	35.299	3.66327	9	42	9	1	5405	571.6	5.34	Not Found	Peak Found	Not Found	High	High	High		100	10.473	100	70.1577		17.4		200	182.6	200	0.121	0	45.64	9	283	9
FALSE	High	IsMasterProtein	ch20i_Q9UBR2	Cathepsin Z OS=Homo sapiens GN=CTSZ PE=1 SV=1	0	11.349	9.57096	2	8	2	1	303	33.8	7.11	Not Found	Not Found	Peak Found	High	High	High		100	100	9.879	69.9597			18.4	200	200	181.6	0.334	0	14.48	2	44	2
FALSE	High	IsMasterProtein	Q76M96-2	Isoform 2 of Coiled-coil domain-containing protein 80 OS=Homo sapiens GN=CCDC80	0	30.694	8.2206	5	22	5	1	961	109.4	9.72	Not Found	Not Found	Peak Found	High	High	High		100	100	6.278	68.7593			27.5	200	200	172.5	0.215	0	26.69	5	289	5
FALSE	High	IsMasterProtein	B0YJ32	Laminin alpha-3 chain variant 1 OS=Homo sapiens GN=LAMA3 PE=4 SV=1	0	34.789	2.78861	7	52	6	1	3335	366.7	7.24	Peak Found	Not Found	Not Found	High	High	High		1.383	100	100	67.1277	83.9			116.1	200	200	0.109	0	78.04	7	417	7
FALSE	High	IsMasterProtein	A0A024R451	Serpin peptidase inhibitor, clade E (Nexin, plasminogen activator inhibitor type 1), member 2, isoform CRA_a OS=Homo sapiens GN=SERPINE2 PE=3 SV=1	0	37.186	18.3417	6	44	1	1	398	44	9.29	Not Found	Peak Found	Not Found	High	High	High		100	33.36		66.68		5.8		200	194.2		1.565	0	45.77	6	600	6
FALSE	High	IsMasterProtein	ch14u_O43405	Cochlin OS=Homo sapiens GN=COCH PE=1 SV=1	0	7.324	4.18182	2	8	2	1	550	59.4	7.96	Peak Found	Not Found	Not Found	High	High	High		30.178		100	65.089	6.4			193.6		200	0.155	0	8.28	2	146	2
FALSE	High	IsMasterProtein	ch11i_P42785-2	Isoform 2 of Lysosomal Pro-X carboxypeptidase OS=Homo sapiens GN=PRCP	0	7.986	3.67505	1	4	1	1	517	58.1	7.4	Peak Found	Not Found	Not Found	High	High	Not Found		23.741	100		61.8705	8.1			191.9	200		0.101	0	7.66	1	100	1
FALSE	High	IsMasterProtein	B3KW79	Carboxypeptidase OS=Homo sapiens PE=2 SV=1	0	9.417	7.77311	3	10	3	1	476	54.1	5.6	Not Found	Peak Found	Peak Found	High	High	High		100	26.15	43.544	56.5647		7.4	4.5	200	192.6	195.5	0.304	0	10.78	3	94	3
FALSE	High	IsMasterProtein	Q9NZV1	Cysteine-rich motor neuron 1 protein OS=Homo sapiens GN=CRIM1 PE=1 SV=1	0	68.212	11.39	9	46	9	1	1036	113.7	5.21	Peak Found	Peak Found	Peak Found	High	High	High		33.285	25.514	100	52.933	5.8	7.5	1.4	194.2	192.5	198.6	0.66	0	58.54	9	603	9
FALSE	High	IsMasterProtein	A0A024QZM9	Plasminogen activator, urokinase, isoform CRA_a OS=Homo sapiens GN=PLAU PE=3 SV=1	0	9.523	9.51276	3	13	3	1	431	48.5	8.41	Peak Found	Not Found	Peak Found	High	High	High		22.809	100	35.241	52.6833	8.4		5.5	191.6	200	194.5	0.304	0	10.7	3	137	2
FALSE	High	IsMasterProtein	P35555	Fibrillin-1 OS=Homo sapiens GN=FBN1 PE=1 SV=3	0	11.333	2.08986	4	16	2	1	2871	312	4.93	Peak Found	Not Found	Not Found	High	Not Found	High		4.384		100	52.192	37.1			162.9		200	0.057	0	6.44	4	208	4
FALSE	High	IsMasterProtein	P19883	Follistatin OS=Homo sapiens GN=FST PE=1 SV=2	0	10.192	14.2442	3	8	3	1	344	38	5.67	Not Found	High	Not Found	High	Peak Found	High			3.174	100	51.587		47.9			152.1	200	0.389	0	6	3	99	3
FALSE	High	IsMasterProtein	A8K2N0	cDNA FLJ77835, highly similar to Homo sapiens complement component 1, s subcomponent (C1S), transcript variant 2, mRNA OS=Homo sapiens PE=2 SV=1	0	160.672	28.7791	17	239	17	1	688	76.6	4.98	Peak Found	Peak Found	High	High	High	High		65.591	36.695	40.618	47.6347	3	5.3	4.8	197	194.7	195.2	4.436	0	347.62	17	4248	17
FALSE	High	IsMasterProtein	ch03i_P49788	Retinoic acid receptor responder protein 1 OS=Homo sapiens GN=RARRES1 PE=1 SV=2	0	10.589	11.5646	3	22	3	1	294	33.3	8.51	Peak Found	Peak Found	Not Found	High	High	High		17.891	23.226	100	47.039	10.6	8.3		189.4	191.7	200	0.54	0	9.44	3	163	3
FALSE	High	IsMasterProtein	O00391	Sulfhydryl oxidase 1 OS=Homo sapiens GN=QSOX1 PE=1 SV=3	0	46.768	13.6546	7	44	7	1	747	82.5	8.92	Peak Found	Not Found	Peak Found	High	High	High		15.605	100	24.964	46.8563	12		7.7	188	200	192.3	0.501	0	64.16	7	1001	7
FALSE	High	IsMasterProtein	ch02u_Q16769	Glutaminyl-peptide cyclotransferase OS=Homo sapiens GN=QPCT PE=1 SV=1	0	9.326	6.92521	2	18	2	1	361	40.9	6.61	Not Found	Peak Found	Peak Found	High	High	High		100	14.565	14.106	42.8903		12.8	13.2	200	187.2	186.8	0.274	0	20.7	2	230	2
FALSE	High	IsMasterProtein	ch17i_P28799	Granulins OS=Homo sapiens GN=GRN PE=1 SV=2	0	110.15	23.1029	11	163	11	1	593	63.5	6.83	Peak Found	High	Peak Found	High	High	High		36.804	36.489	43.604	38.9657	5.3	5.3	4.5	194.7	194.7	195.5	3.771	0	205.38	11	2185	11
FALSE	High	IsMasterProtein	ch14u_Q14112	Nidogen-2 OS=Homo sapiens GN=NID2 PE=1 SV=3	0	17.807	3.34545	3	12	3	1	1375	151.2	5.29	Not Found	Peak Found	Peak Found	High	High	High		100	4.733	9.218	37.9837		34.9	19.6	200	165.1	180.4	0.116	0	19.84	3	259	3
FALSE	High	IsMasterProtein	A8K669	cDNA FLJ78452, highly similar to Homo sapiens legumain (LGMN), transcript variant 2, mRNA OS=Homo sapiens PE=2 SV=1	0	22.076	11.7783	3	20	3	1	433	49.4	6.55	Peak Found	Peak Found	Not Found	High	High	High		5.864	3.959	100	36.6077	29.1	40.3		170.9	159.7	200	0.334	0	27.94	3	372	3
FALSE	High	IsMasterProtein	B2ZZ86	Collagen type V alpha 1 OS=Homo sapiens GN=COL5A1 PE=2 SV=1	0	23.706	1.90424	2	18	2	1	1838	183.5	5.06	Peak Found	Not Found	Peak Found	High	High	High		2.571	100	5.671	36.0807	56		30	144	200	170	0.071	0	28.65	2	154	2
FALSE	High	IsMasterProtein	A8KAJ3	cDNA FLJ77823, highly similar to Homo sapiens EGF-containing fibulin-like extracellular matrix protein 1, transcript variant 3, mRNA OS=Homo sapiens PE=2 SV=1	0	9.894	7.70791	3	10	3	1	493	54.6	5.14	Not Found	Peak Found	Peak Found	High	High	High		100	1.007	6.377	35.7947		99.7	27.1	200	100.3	172.9	0.304	0	7.31	3	95	3
FALSE	High	IsMasterProtein	A8K4K1	cDNA FLJ78216, highly similar to Homo sapiens lysosomal neuraminidase, mRNA OS=Homo sapiens PE=2 SV=1	0	47.315	19.2771	7	65	7	1	415	45.3	5.88	Peak Found	Peak Found	Peak Found	High	High	High		40.261	30.798	26.342	32.467	4.8	6.3	7.3	195.2	193.7	192.7	1.462	0	66.32	7	597	7
FALSE	High	IsMasterProtein	A0A024R5J8	Leucine rich repeat containing 54, isoform CRA_a OS=Homo sapiens GN=LRRC54 PE=4 SV=1	0	29.256	14.7309	5	28	5	1	353	37.8	6.87	Peak Found	Peak Found	Peak Found	High	High	High		27.317	34.47	25.166	28.9843	7.1	5.6	7.6	192.9	194.4	192.4	1.154	0	37.39	5	379	5
FALSE	High	IsMasterProtein	ch04i_Q16270	Insulin-like growth factor-binding protein 7 OS=Homo sapiens GN=IGFBP7 PE=1 SV=1	0	33.121	31.5603	6	36	6	1	282	29.1	7.9	Peak Found	Peak Found	Peak Found	High	High	High		34.147	17.605	20.762	24.1713	5.7	10.7	9.2	194.3	189.3	190.8	1.254	0	47.68	6	493	6
FALSE	High	IsMasterProtein	A0A140VJC8	Testicular tissue protein Li 2 OS=Homo sapiens PE=2 SV=1	0	85.831	15.5844	9	108	9	1	770	86.9	4.82	Peak Found	Peak Found	Peak Found	High	High	High		21.175	23.336	18.029	20.8467	9	8.2	10.5	191	191.8	189.5	0.901	0	169.28	9	1521	9
FALSE	High	IsMasterProtein	ch12u_B4DPQ0	Complement C1r subcomponent OS=Homo sapiens GN=C1R PE=1 SV=1	0	359.542	50.3477	26	396	1	1	719	81.8	6.37	Not Found	Not Found	Not Found	High	High	High		19.043	19.586	20.504	19.711	10	9.7	9.3	190	190.3	190.7	13.678	29	553.15	26	5644	26
FALSE	High	IsMasterProtein	A8K5A4	cDNA FLJ76826, highly similar to Homo sapiens ceruloplasmin (ferroxidase) (CP), mRNA OS=Homo sapiens PE=2 SV=1	0	64.297	12.5822	8	44	8	1	1065	122.1	5.74	High	Peak Found	Peak Found	High	High	High		18.312	14.152	25.148	19.204	10.4	13.2	7.6	189.6	186.8	192.4	0.52	0	66.71	8	841	8
FALSE	High	IsMasterProtein	A0A087WVC6	Receptor-type tyrosine-protein phosphatase eta OS=Homo sapiens GN=PTPRJ PE=1 SV=1	0	43.383	8.19672	7	36	7	1	1342	146.5	5.62	Peak Found	Peak Found	Peak Found	High	High	High		25.058	15.013	17.303	19.1247	7.7	12.5	10.9	192.3	187.5	189.1	0.267	0	51.67	7	614	7
FALSE	High	IsMasterProtein	P07093-3	Isoform 3 of Glia-derived nexin OS=Homo sapiens GN=SERPINE2	0	49.66	16.8704	6	50	1	1	409	45.2	9.22	Peak Found	Peak Found	Not Found	High	High	Not Found		16.009	15.752	23.179	18.3133	11.8	11.9	8.3	188.2	188.1	191.7	2.34	7	59.11	6	656	6
FALSE	High	IsMasterProtein	ch17i_P22692	Insulin-like growth factor-binding protein 4 OS=Homo sapiens GN=IGFBP4 PE=1 SV=2	0	39.09	22.8682	6	83	6	1	258	27.9	7.15	Peak Found	Peak Found	Peak Found	High	High	High		15.473	15.689	16.858	16.0067	12.1	12	11.2	187.9	188	188.8	3.87	0	63.86	6	797	6
FALSE	High	IsMasterProtein	Q59EN5	Prosaposin variant (Fragment) OS=Homo sapiens PE=2 SV=1	0	253.164	40.7547	21	426	21	1	530	58.7	5.1	High	High	High	High	High	High		15.667	14.962	16.798	15.809	12	12.5	11.2	188	187.5	188.8	17.395	0	474.16	20	4944	21
FALSE	High	IsMasterProtein	ch11i_Q9NS15	Latent-transforming growth factor beta-binding protein 3 OS=Homo sapiens GN=LTBP3 PE=1 SV=4	0	29.028	5.44896	4	27	4	1	1303	139.3	6.07	Peak Found	Peak Found	Peak Found	High	High	High		14.975	28.707	2.906	15.5293	12.5	6.7	51.2	187.5	193.3	148.8	0.184	0	15.35	4	401	4
FALSE	High	IsMasterProtein	O94985	Calsyntenin-1 OS=Homo sapiens GN=CLSTN1 PE=1 SV=1	0	141.643	19.1641	18	166	18	1	981	109.7	4.91	High	High	High	High	High	High		16.801	14.886	14.9	15.529	11.2	12.6	12.6	188.8	187.4	187.4	2.754	0	214.94	18	2435	18
FALSE	High	IsMasterProtein	ch11u_Q9GZP0	Platelet-derived growth factor D OS=Homo sapiens GN=PDGFD PE=1 SV=1	0	20.724	14.5946	5	22	5	1	370	42.8	7.97	High	High	High	High	High	High		15.282	15.413	14.968	15.221	12.3	12.2	12.5	187.7	187.8	187.5	0.823	0	24.39	5	298	5
FALSE	High	IsMasterProtein	ch11i_Q06481	Amyloid-like protein 2 OS=Homo sapiens GN=APLP2 PE=1 SV=2	0	72.154	11.6645	9	75	9	1	763	86.9	4.79	Peak Found	Peak Found	Peak Found	High	High	High		19.376	15.465	8.982	14.6077	9.8	12.1	20	190.2	187.9	180	1.015	0	75.54	9	733	9
FALSE	High	IsMasterProtein	A5PLK9	Metalloendopeptidase OS=Homo sapiens GN=BMP1 PE=2 SV=1	0	14.122	5.07099	4	10	4	1	986	111.2	6.83	Peak Found	Not Found	Peak Found	High	Not Found	High		17.502		10.065	13.7835	10.8		18.1	189.2		181.9	0.169	0	10.86	4	59	4
FALSE	High	IsMasterProtein	ch01u_Q9GZM7	Tubulointerstitial nephritis antigen-like OS=Homo sapiens GN=TINAGL1 PE=1 SV=1	0	7.554	5.35332	2	10	2	1	467	52.4	6.99	Not Found	Peak Found	Peak Found	High	High	High			10.63	15.706	13.168		17.2	12		182.8	188	0.212	0	8.62	2	46	2
FALSE	High	IsMasterProtein	A8K2H4	cDNA FLJ78235 OS=Homo sapiens PE=2 SV=1	0	326.812	48.6726	19	449	19	1	339	37.8	6.3	High	High	High	High	High	High		12.792	13.023	12.434	12.7497	14.5	14.3	14.9	185.5	185.7	185.1	463.159	0	614.44	19	6884	19
FALSE	High	IsMasterProtein	Q6ZUY8	Lipase OS=Homo sapiens PE=2 SV=1	0	7.563	6.73317	2	13	2	1	401	45.4	7.11	Peak Found	Peak Found	Peak Found	High	High	High		9.325	8.383	20.315	12.6743	19.4	21.3	9.4	180.6	178.7	190.6	0.274	0	11.54	2	120	2
FALSE	High	IsMasterProtein	ch08i_P10909-2	Isoform 2 of Clusterin OS=Homo sapiens GN=CLU	0	183.73	27.1457	15	240	15	1	501	57.8	6.68	High	High	High	High	High	High		13.507	13.2	11.276	12.661	13.8	14.1	16.3	186.2	185.9	183.7	10.86	0	329.05	15	4103	15
FALSE	High	IsMasterProtein	P16035	Metalloproteinase inhibitor 2 OS=Homo sapiens GN=TIMP2 PE=1 SV=2	0	44.205	15.9091	3	29	3	1	220	24.4	7.49	Peak Found	Peak Found	Peak Found	High	High	High		11.424	14.309	10.865	12.1993	16.1	13.1	16.9	183.9	186.9	183.1	1.512	0	33.36	3	475	3
FALSE	High	IsMasterProtein	ch15i_Q08431	Lactadherin OS=Homo sapiens GN=MFGE8 PE=1 SV=2	0	221.482	51.938	16	207	2	1	387	43.1	8.15	Peak Found	Peak Found	Peak Found	High	High	High		11.491	12.744	12.336	12.1903	16	14.6	15	184	185.4	185	16.378	17	290.95	16	3424	16
FALSE	High	IsMasterProtein	A0A1A7UP97	Galactosamine (N-acetyl)-6-sulfatase OS=Homo sapiens GN=GALNS PE=4 SV=1	0	30.535	13.7931	4	26	4	1	522	57.9	6.83	High	High	High	High	High	High		11.286	11.241	13.539	12.022	16.3	16.3	13.8	183.7	183.7	186.2	0.487	0	33.57	4	342	4
FALSE	High	IsMasterProtein	ch02i_P05997	Collagen alpha-2(V) chain OS=Homo sapiens GN=COL5A2 PE=1 SV=3	0	23.066	1.66778	3	30	3	1	1499	144.8	6.46	Peak Found	Peak Found	Peak Found	High	High	High		5.909	14.448	14.75	11.7023	28.9	12.9	12.7	171.1	187.1	187.3	0.136	0	29.25	3	225	3
FALSE	High	IsMasterProtein	A5PLM9	Cathepsin L1 OS=Homo sapiens GN=CTSL1 PE=2 SV=1	0	51.086	20.1201	9	73	9	1	333	37.5	5.45	High	Peak Found	High	High	High	High		11.13	11.83	11.657	11.539	16.5	15.6	15.8	183.5	184.4	184.2	9	0	72.09	9	1146	8
FALSE	High	IsMasterProtein	Q9NRN5	Olfactomedin-like protein 3 OS=Homo sapiens GN=OLFML3 PE=2 SV=1	0	16.154	5.66502	2	12	2	1	406	46	6.57	Peak Found	Peak Found	Not Found	High	High	High		8.071	14.822		11.4465	22	12.6		178	187.4		0.334	0	10.6	2	238	2
FALSE	High	IsMasterProtein	V9HWI3	Cathepsin D (Lysosomal aspartyl peptidase), isoform CRA_a OS=Homo sapiens GN=HEL-S-130P PE=2 SV=1	0	291.442	51.9417	20	475	13	1	412	44.5	6.54	High	High	High	High	High	High		11.4	10.74	11.015	11.0517	16.1	17	16.6	183.9	183	183.4	366.466	16	508.62	20	4754	20
FALSE	High	IsMasterProtein	A8K6A7	Alpha-mannosidase OS=Homo sapiens PE=2 SV=1	0	138.366	23.64	17	123	17	1	1011	113.7	7.28	High	High	High	High	High	High		9.625	12.432	10.583	10.88	18.8	14.9	17.3	181.2	185.1	182.7	1.921	0	141.8	17	1435	16
FALSE	High	IsMasterProtein	B3KQF4	cDNA FLJ90373 fis, clone NT2RP2004606, highly similar to Metalloproteinase inhibitor 1 OS=Homo sapiens PE=2 SV=1	0	36.853	28.0193	4	33	4	1	207	23.2	8.1	High	High	High	High	High	High		11.02	10.275	11.255	10.85	16.6	17.7	16.3	183.4	182.3	183.7	3.329	0	32.63	4	418	4
FALSE	High	IsMasterProtein	P42830	C-X-C motif chemokine 5 OS=Homo sapiens GN=CXCL5 PE=1 SV=1	0	6.926	29.8246	3	12	3	1	114	12	8.88	Peak Found	Peak Found	Peak Found	High	High	High		13.643	10.013	8.737	10.7977	13.7	18.2	20.5	186.3	181.8	179.5	1.683	0	1.87	3	54	3
FALSE	High	IsMasterProtein	B3KM43	cDNA FLJ10228 fis, clone HEMBB1000119, highly similar to N-acetylserotonin O-methyltransferase-like protein OS=Homo sapiens PE=2 SV=1	0.002	2.283	2.0934	1	6	1	1	621	68.8	6.13	Peak Found	Not Found	Peak Found	High	High	High		11.103		9.958	10.5305	16.5		18.3	183.5		181.7	0.068	0	0	1	16	1
FALSE	High	IsMasterProtein	ch08u_Q9Y4K0	Lysyl oxidase homolog 2 OS=Homo sapiens GN=LOXL2 PE=1 SV=1	0	90.761	11.2403	5	84	5	1	774	86.7	6.38	High	High	High	High	High	High		10.115	10.344	9.295	9.918	18	17.6	19.4	182	182.4	180.6	1.11	0	119.63	5	1433	5
FALSE	High	IsMasterProtein	B4DJQ8	cDNA FLJ55694, highly similar to Dipeptidyl-peptidase 1 (EC 3.4.14.1) OS=Homo sapiens PE=2 SV=1	0	73.377	22.6457	9	87	9	1	446	50.1	6.99	High	High	High	High	High	High		9.715	9.904	9.457	9.692	18.7	18.3	19.1	181.3	181.7	180.9	2.481	0	116.14	9	1234	8
FALSE	High	IsMasterProtein	B3KQQ9	cDNA PSEC0048 fis, clone NT2RP2000028, highly similar to Serine protease 23 OS=Homo sapiens PE=2 SV=1	0	10.691	10.1828	3	16	3	1	383	43	9.36	High	High	High	High	Peak Found	High		9.22	8.025	10.913	9.386	19.6	22.2	16.8	180.4	177.8	183.2	0.369	0	13.56	3	121	3
FALSE	High	IsMasterProtein	B1AHL2	Fibulin-1 OS=Homo sapiens GN=FBLN1 PE=1 SV=1	0	57.831	15.1179	6	69	3	1	721	78.3	5.39	High	High	High	High	High	High		9.265	6.54	11.17	8.99167	19.5	26.5	16.4	180.5	173.5	183.6	0.725	2	105.43	6	987	6
FALSE	High	IsMasterProtein	B2R758	cDNA, FLJ93295, highly similar to Homo sapiens glucosaminyl (N-acetyl) transferase 3, mucin type (GCNT3), mRNA OS=Homo sapiens PE=2 SV=1	0	50.021	21.2329	7	35	7	1	438	50.9	8.25	High	High	Peak Found	High	High	High		10.763	9.028	7.183	8.99133	17	19.9	24.4	183	180.1	175.6	0.911	0	37.97	7	408	7
FALSE	High	IsMasterProtein	ch05i_P35556	Fibrillin-2 OS=Homo sapiens GN=FBN2 PE=1 SV=3	0	38.597	4.25824	10	45	8	1	2912	314.6	4.86	Peak Found	Peak Found	Peak Found	High	High	High		10.078	10.412	6.124	8.87133	18.1	17.5	28.1	181.9	182.5	171.9	0.181	2	37.02	10	409	10
FALSE	High	IsMasterProtein	ch06u_Q9BTY2	Plasma alpha-L-fucosidase OS=Homo sapiens GN=FUCA2 PE=1 SV=2	0	46.599	19.4861	7	40	7	1	467	54	6.25	High	High	High	High	High	High		9.878	8.031	8.665	8.858	18.4	22.1	20.7	181.6	177.9	179.3	0.848	0	53.6	7	662	7
FALSE	High	IsMasterProtein	chXu_P06280	Alpha-galactosidase A OS=Homo sapiens GN=GLA PE=1 SV=1	0	48.331	25.1748	9	55	9	1	429	48.7	5.6	Peak Found	Peak Found	High	High	High	High		9.062	7.848	9.613	8.841	19.9	22.6	18.8	180.1	177.4	181.2	1.276	0	59.9	9	576	9
FALSE	High	IsMasterProtein	ch20u_P01034	Cystatin-C OS=Homo sapiens GN=CST3 PE=1 SV=1	0	13.466	19.1781	2	16	2	1	146	15.8	8.75	Peak Found	Peak Found	Peak Found	High	High	High		9.499	7.855	8.359	8.571	19	22.6	21.4	181	177.4	178.6	0.585	0	14.77	2	286	2
FALSE	High	IsMasterProtein	O75787	Renin receptor OS=Homo sapiens GN=ATP6AP2 PE=1 SV=2	0	11.702	8.28571	3	19	3	1	350	39	6.1	High	High	High	High	High	High		7.115	7.44	10.496	8.35033	24.6	23.7	17.4	175.4	176.3	182.6	0.719	0	10.63	3	66	3
FALSE	High	IsMasterProtein	ch01i_Q6PCB0	von Willebrand factor A domain-containing protein 1 OS=Homo sapiens GN=VWA1 PE=1 SV=1	0	46.839	18.427	5	36	5	1	445	46.8	7.68	Peak Found	Peak Found	Peak Found	High	High	High		7.599	6.607	10.214	8.14	23.3	26.3	17.8	176.7	173.7	182.2	1.154	0	59.68	5	455	5
FALSE	High	IsMasterProtein	ch06i_Q86SQ4-3	Isoform 3 of G-protein coupled receptor 126 OS=Homo sapiens GN=GPR126	0	19.804	4.72	4	18	4	1	1250	139.8	7.75	Peak Found	Peak Found	Peak Found	High	High	High		3.464	11.433	8.77	7.889	44.8	16.1	20.5	155.2	183.9	179.5	0.172	0	21.34	4	327	4
FALSE	High	IsMasterProtein	ch05u_Q15582	Transforming growth factor-beta-induced protein ig-h3 OS=Homo sapiens GN=TGFBI PE=1 SV=1	0	262.868	45.388	22	269	22	1	683	74.6	7.71	High	High	High	High	High	High		8.001	7.831	7.734	7.85533	22.2	22.6	22.9	177.8	177.4	177.1	7.962	0	351.38	22	3343	22
FALSE	High	IsMasterProtein	A0A140VK72	Testis secretory sperm-binding protein Li 199a OS=Homo sapiens PE=2 SV=1	0	6.547	7.21868	3	8	3	1	471	51.9	5.76	Peak Found	Not Found	Peak Found	High	Not Found	High		8.323		7.323	7.823	21.5		24	178.5		176	0.304	0	0	3	0	3
FALSE	High	IsMasterProtein	B4DVA7	Beta-hexosaminidase OS=Homo sapiens PE=2 SV=1	0	103.239	26.8519	12	90	2	1	540	62	5.26	Peak Found	Peak Found	Not Found	High	High	High		8.925	8.027	6.255	7.73567	20.2	22.2	27.6	179.8	177.8	172.4	3.047	9	105.7	12	1336	12
FALSE	High	IsMasterProtein	A0A024R462	Fibronectin 1, isoform CRA_n OS=Homo sapiens GN=FN1 PE=4 SV=1	0	757.681	25.69	43	823	2	1	2355	259	5.73	Peak Found	Peak Found	Peak Found	High	High	High		7.448	7.751	7.982	7.727	23.7	22.9	22.3	176.3	177.1	177.7	6.779	65	1192.02	43	16601	43
FALSE	High	IsMasterProtein	ch17i_P54802	Alpha-N-acetylglucosaminidase OS=Homo sapiens GN=NAGLU PE=1 SV=2	0	108.126	22.0727	12	77	12	1	743	82.2	6.65	High	High	Peak Found	High	High	High		7.072	9.236	6.19	7.49933	24.8	19.5	27.8	175.2	180.5	172.2	1.512	0	109.9	12	1585	12
FALSE	High	IsMasterProtein	B3KME2	cDNA FLJ10772 fis, clone NT2RP4000243, highly similar to Cartilage-associated protein OS=Homo sapiens PE=2 SV=1	0	26.356	19.202	6	30	6	1	401	46.5	5.85	Peak Found	Peak Found	High	High	High	High		13.443	5.546	3.343	7.444	13.8	30.6	46.1	186.2	169.4	153.9	0.978	0	24.97	6	223	6
FALSE	High	IsMasterProtein	ch01u_P04066	Tissue alpha-L-fucosidase OS=Homo sapiens GN=FUCA1 PE=1 SV=4	0	12.199	6.00858	2	16	2	1	466	53.7	6.84	High	High	High	High	High	High		6.271	7.366	8.313	7.31667	27.5	23.9	21.5	172.5	176.1	178.5	0.318	0	19.99	2	151	2
FALSE	High	IsMasterProtein	ch20i_O75882	Attractin OS=Homo sapiens GN=ATRN PE=1 SV=2	0	86.016	9.23723	13	107	13	1	1429	158.4	7.31	High	High	High	High	High	High		6.456	7.676	7.787	7.30633	26.8	23.1	22.8	173.2	176.9	177.2	0.778	0	136.13	13	1507	11
FALSE	High	IsMasterProtein	A8K335	cDNA FLJ76254, highly similar to Homo sapiens gamma-glutamyl hydrolase (GGH), mRNA OS=Homo sapiens PE=2 SV=1	0	132.584	33.0189	11	173	11	1	318	36	7.42	High	High	High	High	High	High		7.132	7.222	7.326	7.22667	24.6	24.3	24	175.4	175.7	176	24.119	0	195.56	11	1597	11
FALSE	High	IsMasterProtein	ch15u_H3BTH8	Hyaluronan and proteoglycan link protein 3 OS=Homo sapiens GN=HAPLN3 PE=1 SV=1	0	12.261	13.2701	5	18	4	1	422	47.7	6.68	Peak Found	Not Found	Peak Found	High	Not Found	High		7.727	6.407	6.914	7.016	22.9	27	25.3	177.1	173	174.7	0.616	1	14.66	5	119	5
FALSE	High	IsMasterProtein	ch03u_Q12841	Follistatin-related protein 1 OS=Homo sapiens GN=FSTL1 PE=1 SV=1	0.001	3.309	7.79221	2	4	2	1	308	35	5.52	Not Found	Peak Found	Not Found	Not Found	High	High			7.002		7.002		25			175		0.222	0	1.9	2	19	2
FALSE	High	IsMasterProtein	Q86XX4-2	Isoform 2 of Extracellular matrix protein FRAS1 OS=Homo sapiens GN=FRAS1	0	103.493	7.57727	19	88	19	1	4012	443.4	5.59	Peak Found	High	Peak Found	High	High	High		7.453	6.701	6.162	6.772	23.7	26	27.9	176.3	174	172.1	0.286	0	96.12	19	831	19
FALSE	High	IsMasterProtein	Q13332-2	Isoform PTPS-MEA of Receptor-type tyrosine-protein phosphatase S OS=Homo sapiens GN=PTPRS	0	50.313	9.12842	9	29	9	1	1939	215.8	6.49	Peak Found	High	Peak Found	High	High	High		5.189	10.154	4.94	6.761	32.3	17.9	33.7	167.7	182.1	166.3	0.253	0	38.58	8	387	9
FALSE	High	IsMasterProtein	B3KM35	cDNA FLJ10144 fis, clone HEMBA1003286, highly similar to Beta-1,4-galactosyltransferase 4 (EC 2.4.1.-) OS=Homo sapiens PE=2 SV=1	0	8.311	5.23256	1	6	1	1	344	40	9.07	Peak Found	Peak Found	Peak Found	High	High	High		5.203	8.533	5.998	6.578	32.2	21	28.6	167.8	179	171.4	0.101	0	12.08	1	143	1
FALSE	High	IsMasterProtein	A0A0S2Z3Y1	Lectin galactoside-binding soluble 3 binding protein isoform 1 (Fragment) OS=Homo sapiens GN=LGALS3BP PE=2 SV=1	0	580.38	38.2906	21	884	21	1	585	65.3	5.27	High	High	High	High	High	High		6.35	6.356	6.268	6.32467	27.2	27.2	27.5	172.8	172.8	172.5	173.753	0	1321.2	21	18837	21
FALSE	High	IsMasterProtein	A0A024R0A1	Macrophage colony-stimulating factor 1 OS=Homo sapiens GN=CSF1 PE=4 SV=1	0	78.436	11.7329	6	80	6	1	554	60.1	5.29	High	High	High	High	High	High		6.387	6.28	6.031	6.23267	27.1	27.5	28.4	172.9	172.5	171.6	1.754	0	106.52	6	1157	6
FALSE	High	IsMasterProtein	A7Y9J9	Mucin 5AC, oligomeric mucus/gel-forming OS=Homo sapiens GN=MUC5AC PE=4 SV=1	0	318.498	7.62043	30	275	17	1	6207	648.4	6.76	High	High	High	High	High	High		5.589	6.221	6.55	6.12	30.4	27.7	26.5	169.6	172.3	173.5	0.623	0	354.79	30	4551	29
FALSE	High	IsMasterProtein	B4E284	cDNA FLJ51188, highly similar to N-acetylglucosamine-6-sulfatase (EC3.1.6.14) OS=Homo sapiens PE=2 SV=1	0	54.963	21.2329	10	80	10	1	584	65.8	8.07	High	High	High	High	High	High		6.248	5.54	6.481	6.08967	27.6	30.6	26.7	172.4	169.4	173.3	1.829	0	88.53	10	761	10
FALSE	High	IsMasterProtein	ch21i_P12109	Collagen alpha-1(VI) chain OS=Homo sapiens GN=COL6A1 PE=1 SV=3	0	115.115	17.3152	15	131	15	1	1028	108.5	5.43	High	High	High	High	High	High		6.087	5.819	6.034	5.98	28.2	29.3	28.4	171.8	170.7	171.6	1.127	0	166.85	15	1703	15
FALSE	High	IsMasterProtein	ch09u_P01031	Complement C5 OS=Homo sapiens GN=C5 PE=1 SV=4	0	156.853	20.6444	28	199	28	1	1676	188.2	6.52	High	High	High	High	High	High		4.845	7.211	5.519	5.85833	34.2	24.4	30.7	165.8	175.6	169.3	1.188	0	221.96	28	2344	27
FALSE	High	IsMasterProtein	ch17i_Q15818	Neuronal pentraxin-1 OS=Homo sapiens GN=NPTX1 PE=2 SV=2	0	126.36	24.3056	10	110	10	1	432	47.1	6.55	High	High	High	High	High	High		4.672	5.991	6.548	5.737	35.3	28.6	26.5	164.7	171.4	173.5	4.995	0	160.64	10	1717	10
FALSE	High	IsMasterProtein	D3DQH8	Secreted protein, acidic, cysteine-rich (Osteonectin), isoform CRA_a OS=Homo sapiens GN=SPARC PE=4 SV=1	0	22.113	15.5556	5	28	5	1	315	36	4.88	Peak Found	Peak Found	Peak Found	High	High	High		4.726	5.522	6.654	5.634	34.9	30.7	26.1	165.1	169.3	173.9	0.968	0	33.44	5	307	5
FALSE	High	IsMasterProtein	ch04u_P20933	N(4)-(beta-N-acetylglucosaminyl)-L-asparaginase OS=Homo sapiens GN=AGA PE=1 SV=2	0	17.609	23.1214	5	34	5	1	346	37.2	6.28	Peak Found	Peak Found	Peak Found	High	High	High		4.979	5.782	5.65	5.47033	33.5	29.5	30.1	166.5	170.5	169.9	1.239	0	16.54	5	151	5
FALSE	High	IsMasterProtein	ch05u_P07686	Beta-hexosaminidase subunit beta OS=Homo sapiens GN=HEXB PE=1 SV=3	0	125.623	29.8561	16	120	15	1	556	63.1	6.76	High	High	High	High	High	High		6.143	4.342	5.858	5.44767	28	37.4	29.2	172	162.6	170.8	4.722	1	151.21	16	1400	16
FALSE	High	IsMasterProtein	A0A024RAB6	Heparan sulfate proteoglycan 2 (Perlecan), isoform CRA_b OS=Homo sapiens GN=HSPG2 PE=4 SV=1	0	1080.51	32.2135	99	1031	95	1	4346	463.7	6.51	High	High	High	High	High	High		5.268	5.102	5.551	5.307	31.9	32.8	30.5	168.1	167.2	169.5	5.158	5	1426.52	98	16844	96
FALSE	High	IsMasterProtein	A8KAQ3	cDNA FLJ76489, highly similar to Homo sapiens sortilin 1 (SORT1), mRNA OS=Homo sapiens PE=2 SV=1	0.001	3.73	1.20337	1	4	1	1	831	92	5.74	Not Found	Not Found	Peak Found	Not Found	Not Found	High				5.117	5.117			32.7			167.3	0.054	0	5.19	1	54	1
FALSE	High	IsMasterProtein	ch09u_Q13219	Pappalysin-1 OS=Homo sapiens GN=PAPPA PE=1 SV=3	0	307.364	22.1881	32	275	32	1	1627	180.9	6.18	High	High	High	High	High	High		5.105	5.081	5.127	5.10433	32.8	32.9	32.6	167.2	167.1	167.4	3.097	0	348.2	32	3961	32
FALSE	High	IsMasterProtein	A8K7L9	cDNA FLJ77787 OS=Homo sapiens PE=2 SV=1	0	12.275	7.90378	2	13	2	1	291	32.7	7.3	High	High	High	High	High	High		5.627	4.542	4.914	5.02767	30.2	36.1	33.8	169.8	163.9	166.2	0.719	0	13.76	1	154	2
FALSE	High	IsMasterProtein	P09529	Inhibin beta B chain OS=Homo sapiens GN=INHBB PE=1 SV=2	0.001	3.151	5.65111	2	4	2	1	407	45.1	8.03	Not Found	Peak Found	Not Found	Not Found	High	High			4.738		4.738		34.9			165.1		0.259	0	0	2	29	2
FALSE	High	IsMasterProtein	A4D1W8	Ependymin related protein 1 (Zebrafish), isoform CRA_b OS=Homo sapiens GN=UCC1 PE=4 SV=1	0	14.506	6.68605	2	22	2	1	344	38.1	9.58	High	High	High	High	High	High		4.622	4.49	5.009	4.707	35.6	36.4	33.3	164.4	163.6	166.7	0.389	0	23.26	2	348	2
FALSE	High	IsMasterProtein	A0A024R509	Arylsulfatase A, isoform CRA_a OS=Homo sapiens GN=ARSA PE=4 SV=1	0	9.868	10.2161	3	10	3	1	509	53.8	6.07	Not Found	Peak Found	Not Found	High	High	High			4.666		4.666		35.3			164.7		0.438	0	10.33	3	90	2
FALSE	High	IsMasterProtein	Q92743	Serine protease HTRA1 OS=Homo sapiens GN=HTRA1 PE=1 SV=1	0	15.849	7.29167	3	16	3	1	480	51.3	7.83	Peak Found	High	Peak Found	High	High	High		3.915	4.644	4.937	4.49867	40.7	35.4	33.7	159.3	164.6	166.3	0.492	0	24.5	3	84	3
FALSE	High	IsMasterProtein	ch11i_P98088	Mucin-5AC OS=Homo sapiens GN=MUC5AC PE=1 SV=4	0	891.112	18.96	58	836	27	1	5654	585.2	7.02	High	High	High	High	High	High		4.364	4.581	4.42	4.455	37.3	35.8	36.9	162.7	164.2	163.1	3.241	43	1159.61	58	15143	57
FALSE	High	IsMasterProtein	ch13u_A0A024R644	Ceroid-lipofuscinosis neuronal protein 5 OS=Homo sapiens GN=CLN5 PE=1 SV=1	0.001	2.862	2.2113	1	6	1	1	407	46.3	8.38	Not Found	Peak Found	Not Found	Not Found	High	High			4.418		4.418		36.9			163.1		0.101	0	5.78	1	44	1
FALSE	High	IsMasterProtein	B3KQR3	cDNA PSEC0065 fis, clone NT2RP2000997, highly similar to Protein CREG1 OS=Homo sapiens PE=2 SV=1	0	21.623	15.4545	3	56	3	1	220	24	7.59	High	High	High	High	High	High		4.483	3.668	5.077	4.40933	36.5	42.8	32.9	163.5	157.2	167.1	1.848	0	52.86	3	270	3
FALSE	High	IsMasterProtein	O00468-6	Isoform 6 of Agrin OS=Homo sapiens GN=AGRN	0	660.767	36.9682	52	802	52	1	2045	214.7	6.4	High	High	High	High	High	High		4.49	4.37	4.295	4.385	36.4	37.2	37.8	163.6	162.8	162.2	8.575	0	1091.98	50	13881	52
FALSE	High	IsMasterProtein	ch21i_P39060	Collagen alpha-1(XVIII) chain OS=Homo sapiens GN=COL18A1 PE=1 SV=5	0	79.438	8.15279	10	116	10	1	1754	178.1	6.01	High	High	High	High	High	High		4.526	4.505	4.004	4.345	36.2	36.3	40	163.8	163.7	160	0.614	0	130.59	10	1308	10
FALSE	High	IsMasterProtein	H0YMD1	Low-density lipoprotein receptor OS=Homo sapiens GN=LDLR PE=1 SV=1	0	64.163	12.2363	9	56	9	1	948	104.7	5.5	High	Peak Found	High	High	High	High		2.863	6.975	3.179	4.339	51.8	25.1	47.9	148.2	174.9	152.1	0.817	0	66.74	9	621	9
FALSE	High	IsMasterProtein	T1R7N3	MUC5AC (Fragment) OS=Homo sapiens GN=MUC5AC PE=4 SV=1	0	359.255	18.544	24	306	6	1	4066	413.6	8.09	High	High	High	High	High	High		4.613	4.039	4.35	4.334	35.6	39.7	37.4	164.4	160.3	162.6	1.382	0	446.48	23	4933	23
FALSE	High	IsMasterProtein	P08572	Collagen alpha-2(IV) chain OS=Homo sapiens GN=COL4A2 PE=1 SV=4	0	21.967	2.80374	4	35	4	1	1712	167.4	8.66	High	High	High	High	High	High		4.247	4.215	4.51	4.324	38.1	38.3	36.3	161.9	161.7	163.7	0.15	0	35.52	4	327	4
FALSE	High	IsMasterProtein	Q68DN3	Neuropilin OS=Homo sapiens GN=DKFZp781F1414 PE=2 SV=1	0	121.867	18.8516	10	119	10	1	923	103	5.95	High	High	High	High	High	High		3.932	4.975	3.815	4.24067	40.5	33.5	41.5	159.5	166.5	158.5	1.387	0	159.83	10	1911	10
FALSE	High	IsMasterProtein	ch09u_P23468	Receptor-type tyrosine-protein phosphatase delta OS=Homo sapiens GN=PTPRD PE=1 SV=2	0	8.618	1.20293	2	10	1	1	1912	214.6	6.57	Peak Found	Peak Found	Not Found	High	High	Not Found		4.396	4.033		4.2145	37.1	39.7		162.9	160.3		0.042	0	8.6	2	90	2
FALSE	High	IsMasterProtein	ch20u_O15230	Laminin subunit alpha-5 OS=Homo sapiens GN=LAMA5 PE=1 SV=8	0	1234.59	32.1245	90	1434	89	1	3695	399.5	7.02	High	High	High	High	High	High		4.186	4.123	4.224	4.17767	38.6	39	38.3	161.4	161	161.7	6.934	2	1982.28	90	24509	90
FALSE	High	IsMasterProtein	ch07i_O75128-2	Isoform 2 of Protein cordon-bleu OS=Homo sapiens GN=COBL	0.01	1.352	0.595681	1	6	1	1	1343	143.8	7.42	Peak Found	Peak Found	Peak Found	High	High	High		3.716	3.961	3.82	3.83233	42.4	40.3	41.5	157.6	159.7	158.5	0.031	0	5.88	1	59	1
FALSE	High	IsMasterProtein	ch17u_Q9HB40	Retinoid-inducible serine carboxypeptidase OS=Homo sapiens GN=SCPEP1 PE=1 SV=1	0	8.466	8.18584	3	12	3	1	452	50.8	5.81	High	Peak Found	Not Found	High	High	Not Found		0.671	6.91		3.7905	119.7	25.3		80.3	174.7		0.35	0	6.26	3	96	3
FALSE	High	IsMasterProtein	B7Z5L4	cDNA FLJ61340, highly similar to Homo sapiens seizure related 6 homolog-like 2 (SEZ6L2), transcript variant 2, mRNA OS=Homo sapiens PE=2 SV=1	0.001	2.891	2.0585	2	4	2	1	923	99	4.86	Not Found	Peak Found	Not Found	Not Found	High	Not Found			3.753		3.753		42.1			157.9		0.15	0	2.51	2	15	2
FALSE	High	IsMasterProtein	Q8NHP8	Putative phospholipase B-like 2 OS=Homo sapiens GN=PLBD2 PE=1 SV=2	0	42.807	9.50764	5	55	5	1	589	65.4	6.8	High	High	High	High	High	High		3.746	3.378	3.954	3.69267	42.1	45.7	40.4	157.9	154.3	159.6	0.951	0	53.26	5	823	5
FALSE	High	IsMasterProtein	ch19u_P01024	Complement C3 OS=Homo sapiens GN=C3 PE=1 SV=2	0	491.629	38.3043	56	805	56	1	1663	187	6.4	High	High	High	High	High	High		3.946	3.424	3.656	3.67533	40.4	45.2	43	159.6	154.8	157	6.927	0	935.15	56	9766	53
FALSE	High	IsMasterProtein	ch08i_Q16394	Exostosin-1 OS=Homo sapiens GN=EXT1 PE=1 SV=2	0.002	2.158	1.34048	1	4	1	1	746	86.2	9.04	Peak Found	Not Found	Peak Found	High	Not Found	High		2.989		4.08	3.5345	50.1		39.4	149.9		160.6	0.056	0	5.1	1	29	1
FALSE	High	IsMasterProtein	A0A024R1J0	C1q and tumor necrosis factor related protein 6, isoform CRA_a OS=Homo sapiens GN=C1QTNF6 PE=4 SV=1	0	16.988	12.9496	3	18	3	1	278	30.8	6.34	Peak Found	High	High	High	High	High		3.278	3.237	4.014	3.50967	46.8	47.2	39.9	153.2	152.8	160.1	1.154	0	17.22	3	136	3
FALSE	High	IsMasterProtein	ch11i_Q24JP5-2	Isoform 2 of Transmembrane protein 132A OS=Homo sapiens GN=TMEM132A	0	20.59	8.49609	5	13	5	1	1024	110.1	5.62	High	High	Peak Found	High	High	High		2.214	2.103	6.204	3.507	62.2	64.5	27.8	137.8	135.5	172.2	0.284	0	17.72	5	98	4
FALSE	High	IsMasterProtein	ch19u_P30530	Tyrosine-protein kinase receptor UFO OS=Homo sapiens GN=AXL PE=1 SV=3	0	13.72	2.57271	2	28	2	1	894	98.3	5.43	High	High	Peak Found	High	High	High		3.232	3.369	3.72	3.44033	47.3	45.8	42.4	152.7	154.2	157.6	0.179	0	34.77	2	318	2
FALSE	High	IsMasterProtein	D3DSQ1	N-acylsphingosine amidohydrolase (Acid ceramidase) 1, isoform CRA_c OS=Homo sapiens GN=ASAH1 PE=4 SV=1	0	30.819	14.1026	6	62	6	1	546	60.6	8.81	High	High	High	High	High	High		3.125	3.867	3.322	3.438	48.5	41.1	46.3	151.5	158.9	153.7	0.84	0	28.92	6	295	6
FALSE	High	IsMasterProtein	ch15u_P07996	Thrombospondin-1 OS=Homo sapiens GN=THBS1 PE=1 SV=2	0	300.15	22.3077	23	404	23	1	1170	129.3	4.94	High	High	High	High	High	High		3.294	3.407	3.247	3.316	46.6	45.4	47.1	153.4	154.6	152.9	4.623	0	500.46	23	5466	23
FALSE	High	IsMasterProtein	ch09u_Q9UHL4	Dipeptidyl peptidase 2 OS=Homo sapiens GN=DPP7 PE=1 SV=3	0	17.877	7.52033	3	21	3	1	492	54.3	6.32	Peak Found	High	High	High	High	High		3.551	2.6	3.389	3.18	43.9	55.5	45.6	156.1	144.5	154.4	0.532	0	24.33	3	298	3
FALSE	High	IsMasterProtein	O43291	Kunitz-type protease inhibitor 2 OS=Homo sapiens GN=SPINT2 PE=1 SV=2	0	14.129	10.3175	2	11	2	1	252	28.2	8.29	High	Peak Found	Peak Found	High	High	High		3.15	3.146	3.224	3.17333	48.2	48.2	47.3	151.8	151.8	152.7	1.031	0	10.43	2	129	2
FALSE	High	IsMasterProtein	ch22i_P17050	Alpha-N-acetylgalactosaminidase OS=Homo sapiens GN=NAGA PE=1 SV=2	0	4.177	2.6764	1	4	1	1	411	46.5	5.19	Not Found	Peak Found	Not Found	Not Found	High	High			3.136		3.136		48.4			151.6		0.11	0	3.88	1	30	1
FALSE	High	IsMasterProtein	ch04i_A0A087WVP1	Protocadherin Fat 1 OS=Homo sapiens GN=FAT1 PE=1 SV=1	0	117.3	7.23312	23	112	23	1	4590	506.1	5	High	High	High	High	High	High		2.847	3.69	2.677	3.07133	52	42.6	54.4	148	157.4	145.6	0.35	0	124.95	23	876	22
FALSE	High	IsMasterProtein	ch03u_Q02388	Collagen alpha-1(VII) chain OS=Homo sapiens GN=COL7A1 PE=1 SV=2	0	347.271	18.1046	38	330	38	1	2944	295	6.27	High	High	High	High	High	High		3.037	3.021	3.008	3.022	49.5	49.7	49.9	150.5	150.3	150.1	1.192	0	420.21	38	4952	38
FALSE	High	IsMasterProtein	ch01u_Q96P70	Importin-9 OS=Homo sapiens GN=IPO9 PE=1 SV=3	0	4.489	2.01729	1	1	1	1	1041	115.9	4.81	High	Not Found	Not Found	Peak Found	Not Found	Not Found	Acetyl [N-Term]	2.922			2.922	51			149			0.049	0			35	1
FALSE	High	IsMasterProtein	ch07u_P05121	Plasminogen activator inhibitor 1 OS=Homo sapiens GN=SERPINE1 PE=1 SV=1	0	38.324	17.1642	5	39	5	1	402	45	7.2	High	High	High	High	High	High		2.844	2.992	2.789	2.875	52	50.1	52.8	148	149.9	147.2	1.015	0	30.25	5	472	5
FALSE	High	IsMasterProtein	ch15i_Q92859	Neogenin OS=Homo sapiens GN=NEO1 PE=1 SV=2	0	168.158	17.8645	18	115	18	1	1461	159.9	6.54	High	High	High	High	High	High		2.85	2.914	2.7	2.82133	51.9	51.1	54.1	148.1	148.9	145.9	1.546	0	165.02	18	1637	18
FALSE	High	IsMasterProtein	ch16i_A0A087WXI5	Cadherin-1 OS=Homo sapiens GN=CDH1 PE=1 SV=1	0	10.666	1.99336	2	14	2	1	903	100	4.79	Peak Found	High	High	High	High	High		2.611	2.502	2.911	2.67467	55.4	57.1	51.1	144.6	142.9	148.9	0.194	0	5.81	2	80	2
FALSE	High	IsMasterProtein	P61812-2	Isoform B of Transforming growth factor beta-2 OS=Homo sapiens GN=TGFB2	0	27.09	9.72851	4	38	4	1	442	50.5	8.41	High	High	High	High	High	High		2.66	2.562	2.727	2.64967	54.6	56.1	53.7	145.4	143.9	146.3	0.957	0	33.18	4	306	4
FALSE	High	IsMasterProtein	Q96JB3	Hypermethylated in cancer 2 protein OS=Homo sapiens GN=HIC2 PE=1 SV=2	0	13.858	1.62602	1	67	1	1	615	66.1	6.38	High	High	High	High	High	High		2.572	2.575	2.556	2.56767	56	56	56.2	144	144	143.8	0.346	0	44.81	1	97	1
FALSE	High	IsMasterProtein	ch08i_Q15149	Plectin OS=Homo sapiens GN=PLEC PE=1 SV=3	0	105.455	6.98121	26	107	26	1	4684	531.5	5.96	High	High	High	Peak Found	High	Peak Found		7.45	0.126	0.09	2.55533	23.7	177.6	183.5	176.3	22.4	16.5	0.197	0	117.19	25	1065	26
FALSE	High	IsMasterProtein	ch01i_P11047	Laminin subunit gamma-1 OS=Homo sapiens GN=LAMC1 PE=1 SV=3	0	633.435	31.386	39	678	39	1	1609	177.5	5.12	High	High	High	High	High	High		2.539	2.568	2.553	2.55333	56.5	56.1	56.3	143.5	143.9	143.7	15.284	0	891.97	38	12541	38
FALSE	High	IsMasterProtein	E1NZA1	Peroxisome proliferator activated receptor interacting complex protein OS=Homo sapiens GN=PRIC295 PE=2 SV=1	0.001	2.716	0.262074	1	17	1	1	2671	292.6	7.43	Not Found	High	High	Not Found	High	High			2.439	2.458	2.4485		58.1	57.8		141.9	142.2	0.026	0	0	1	98	1
FALSE	High	IsMasterProtein	O00560	Syntenin-1 OS=Homo sapiens GN=SDCBP PE=1 SV=1	0	221.428	38.5906	11	261	11	1	298	32.4	7.53	High	High	High	High	High	High	Acetyl [N-Term]	2.409	2.351	2.38	2.38	58.7	59.7	59.2	141.3	140.3	140.8	128.155	0	264.58	9	3241	10
FALSE	High	IsMasterProtein	ch09i_A0A0D9SGF6	Spectrin alpha chain, non-erythrocytic 1 OS=Homo sapiens GN=SPTAN1 PE=1 SV=1	0	44.562	4.72378	8	28	8	1	2498	287.4	5.36	High	High	High	Peak Found	Not Found	Peak Found		3.843	0.01	2.97	2.27433	41.3	200	50.4	158.7		149.6	0.101	0	34.75	8	439	8
FALSE	High	IsMasterProtein	ch09i_Q9H7P6	Multivesicular body subunit 12B OS=Homo sapiens GN=MVB12B PE=1 SV=2	0	4.663	7.83699	1	2	1	1	319	35.6	8.15	Not Found	Peak Found	Not Found	Not Found	High	Not Found			2.178		2.178		62.9			137.1		0.129	0	3.22	1	43	1
FALSE	High	IsMasterProtein	Q86YQ8	Copine-8 OS=Homo sapiens GN=CPNE8 PE=1 SV=2	0	5.479	4.07801	2	10	2	1	564	63.1	5.96	Peak Found	Peak Found	Peak Found	High	High	High		2.133	2.049	2.311	2.16433	63.8	65.6	60.4	136.2	134.4	139.6	0.15	0	11.13	2	48	2
FALSE	High	IsMasterProtein	ch07i_Q92823-5	Isoform 5 of Neuronal cell adhesion molecule OS=Homo sapiens GN=NRCAM	0	268.45	19.8777	17	241	17	1	1308	144.3	5.67	High	High	High	High	High	High		1.978	1.995	1.94	1.971	67.2	66.8	68	132.8	133.2	132	2.799	0	320.3	17	4310	17
FALSE	High	IsMasterProtein	ch08u_Q9NYI0	PH and SEC7 domain-containing protein 3 OS=Homo sapiens GN=PSD3 PE=1 SV=2	0.002	2.475	0.763359	1	5	1	1	1048	116	5.99	High	High	Not Found	Peak Found	High	Not Found		1.886	1.958		1.922	69.3	67.6		130.7	132.4		0.077	0	0	1	0	1
FALSE	High	IsMasterProtein	ch05i_Q6ZUX7	Lipoma HMGIC fusion partner-like 2 protein OS=Homo sapiens GN=LHFPL2 PE=2 SV=2	0.002	1.661	10.9649	1	2	1	1	228	24.5	6.49	Not Found	Peak Found	Not Found	Not Found	High	Not Found			1.911		1.911		68.7			131.3		0.389	0	0	1	17	1
FALSE	High	IsMasterProtein	ch11i_P36404	ADP-ribosylation factor-like protein 2 OS=Homo sapiens GN=ARL2 PE=1 SV=4	0.001	3.846	4.8913	1	10	1	1	184	20.9	6.34	Peak Found	High	High	High	High	High		2.027	1.68	2.021	1.90933	66.1	74.6	66.2	133.9	125.4	133.8	0.52	0	0	1	36	1
FALSE	High	IsMasterProtein	ch07u_G3XAI2	Laminin subunit beta-1 OS=Homo sapiens GN=LAMB1 PE=1 SV=1	0	730.328	34.6409	50	773	20	1	1810	200.3	4.96	High	High	High	High	High	High		1.895	1.888	1.919	1.90067	69.1	69.3	68.5	130.9	130.7	131.5	15.218	39	1006.72	50	10396	49
FALSE	High	IsMasterProtein	ch12i_Q12860	Contactin-1 OS=Homo sapiens GN=CNTN1 PE=1 SV=1	0	35.634	10.7073	8	29	8	1	1018	113.2	5.9	High	High	High	High	High	High		2.088	1.785	1.82	1.89767	64.8	71.8	70.9	135.2	128.2	129.1	0.397	0	33.1	7	294	8
FALSE	High	IsMasterProtein	ch11i_Q93063-3	Isoform 3 of Exostosin-2 OS=Homo sapiens GN=EXT2	0	5.978	2.26365	1	2	1	1	751	85.8	6.32	Not Found	Not Found	Peak Found	Not Found	Not Found	High				1.725	1.725			73.4			126.6	0.049	0	2.87	1	42	1
FALSE	High	IsMasterProtein	Q7L9L4-2	Isoform 2 of MOB kinase activator 1B OS=Homo sapiens GN=MOB1B	0	9.101	4.97738	1	12	1	1	221	25.5	6.15	High	Not Found	Not Found	High	Not Found	Not Found		1.68			1.68	74.6			125.4			0.585	0	10.01	1	117	1
FALSE	High	IsMasterProtein	ch02i_O75581	Low-density lipoprotein receptor-related protein 6 OS=Homo sapiens GN=LRP6 PE=1 SV=2	0	23.875	2.78983	3	18	3	1	1613	180.3	5.31	High	High	Peak Found	High	High	High		1.88	1.911	1.215	1.66867	69.4	68.7	90.3	130.6	131.3	109.7	0.102	0	19.07	3	136	3
FALSE	High	IsMasterProtein	Q9H1B5	Xylosyltransferase 2 OS=Homo sapiens GN=XYLT2 PE=1 SV=2	0	34.522	6.01156	4	34	4	1	865	96.7	8.22	High	High	High	High	High	High		1.523	1.807	1.633	1.65433	79.3	71.3	75.9	120.7	128.7	124.1	0.512	0	45.8	4	338	4
FALSE	High	IsMasterProtein	A0A024RAL1	Chondroitin sulfate proteoglycan 2 (Versican), isoform CRA_c OS=Homo sapiens GN=CSPG2 PE=4 SV=1	0	191.176	7.01536	15	366	15	1	2409	264.9	4.54	High	High	High	High	High	High		1.629	1.655	1.655	1.64633	76.1	75.3	75.3	123.9	124.7	124.7	1.26	0	423.48	15	4511	14
FALSE	High	IsMasterProtein	ch20u_X6R8A1	Carboxypeptidase OS=Homo sapiens GN=CTSA PE=1 SV=1	0	45.685	17.2691	6	41	6	1	498	56.2	6.61	High	High	High	High	High	High		0.945	2.239	1.74	1.64133	102.8	61.7	73	97.2	138.3	127	0.905	0	46.87	6	628	6
FALSE	High	IsMasterProtein	ch13u_P02462	Collagen alpha-1(IV) chain OS=Homo sapiens GN=COL4A1 PE=1 SV=3	0	6.81	0.958658	1	10	1	1	1669	160.5	8.28	High	Peak Found	High	High	High	High		1.619	1.441	1.794	1.618	76.4	81.9	71.6	123.6	118.1	128.4	0.054	0	15.32	1	74	1
FALSE	High	IsMasterProtein	B2R6X2	Beta-glucuronidase OS=Homo sapiens PE=2 SV=1	0	5.108	2.61137	2	8	2	1	651	74.7	7.02	Not Found	High	High	Not Found	High	High			1.582	1.558	1.57		77.4	78.2		122.6	121.8	0.218	0	7.27	2	69	2
FALSE	High	IsMasterProtein	ch01u_P10586	Receptor-type tyrosine-protein phosphatase F OS=Homo sapiens GN=PTPRF PE=1 SV=2	0	142.677	12.8998	15	96	14	1	1907	212.7	6.3	High	High	High	High	High	High		1.546	1.635	1.455	1.54533	78.6	75.9	81.5	121.4	124.1	118.5	0.645	1	142.32	15	1482	15
FALSE	High	IsMasterProtein	ch20u_Q9UNN8	Endothelial protein C receptor OS=Homo sapiens GN=PROCR PE=1 SV=1	0	18.429	7.14286	1	12	1	1	238	26.7	7.18	High	High	High	High	High	High		1.43	1.373	1.467	1.42333	82.3	84.3	81.1	117.7	115.7	118.9	0.425	0	21.85	1	275	1
FALSE	High	IsMasterProtein	P15291	Beta-1,4-galactosyltransferase 1 OS=Homo sapiens GN=B4GALT1 PE=1 SV=5	0	11.786	5.02513	2	16	2	1	398	43.9	8.65	High	High	High	High	High	High		1.225	1.499	1.542	1.422	89.9	80	78.7	110.1	120	121.3	0.468	0	16	2	181	2
FALSE	High	IsMasterProtein	ch16i_Q92896-2	Isoform 2 of Golgi apparatus protein 1 OS=Homo sapiens GN=GLG1	0	26.562	3.15877	3	18	3	1	1203	137.1	6.9	High	High	High	High	High	High		1.181	1.617	1.302	1.36667	91.7	76.4	86.9	108.3	123.6	113.1	0.134	0	23.07	3	344	3
FALSE	Medium	IsMasterProtein	Q05DH5	EXTL2 protein (Fragment) OS=Homo sapiens GN=EXTL2 PE=2 SV=1	0.013	1.211	3.92749	1	1	1	1	331	37.6	9.14	Not Found	Peak Found	Not Found	Not Found	High	Not Found			1.362		1.362		84.7			115.3		0.145	0	0	1
FALSE	High	IsMasterProtein	A8K7Q1	cDNA FLJ77770, highly similar to Homo sapiens nucleobindin 1 (NUCB1), mRNA OS=Homo sapiens PE=2 SV=1	0	17.657	13.8829	4	19	4	1	461	53.9	5.25	High	High	High	High	High	High		1.466	1.277	1.267	1.33667	81.1	87.9	88.2	118.9	112.1	111.8	0.45	0	22.83	4	77	3
FALSE	High	IsMasterProtein	Q59FB9	Toll interacting protein variant (Fragment) OS=Homo sapiens PE=2 SV=1	0	29.83	17.8977	5	42	5	1	352	38.9	8.46	High	High	High	High	High	High		0.683	2.542	0.744	1.323	118.8	56.5	114.7	81.2	143.5	85.3	1.31	0	32.79	5	331	5
FALSE	High	IsMasterProtein	ch01u_P14543	Nidogen-1 OS=Homo sapiens GN=NID1 PE=1 SV=3	0	15.875	2.1652	2	14	2	1	1247	136.3	5.29	High	High	High	High	High	High		1.336	1.466	1.067	1.28967	85.6	81.1	96.8	114.4	118.9	103.2	0.122	0	19.65	2	279	2
FALSE	High	IsMasterProtein	P62745	Rho-related GTP-binding protein RhoB OS=Homo sapiens GN=RHOB PE=1 SV=1	0	5.38	6.12245	1	8	1	1	196	22.1	5.24	High	High	Not Found	High	High	Not Found		1.33	1.215		1.2725	85.8	90.3		114.2	109.7		0.52	0	0	1	29	1
FALSE	High	IsMasterProtein	A8K0C2	cDNA FLJ75950 OS=Homo sapiens PE=2 SV=1	0	19.888	12.0879	2	15	2	1	273	28.8	8.91	High	High	High	High	High	High		1.291	1.07	1.32	1.227	87.3	96.6	86.2	112.7	103.4	113.8	0.931	0	11.53	2	336	2
FALSE	High	IsMasterProtein	ch19i_P01137	Transforming growth factor beta-1 OS=Homo sapiens GN=TGFB1 PE=1 SV=2	0	53.576	20.5128	9	50	9	1	390	44.3	8.53	High	High	High	High	High	High		1.179	1.21	1.197	1.19533	91.8	90.5	91	108.2	109.5	109	2.675	0	44.31	9	427	9
FALSE	High	IsMasterProtein	ch09i_P98155	Very low-density lipoprotein receptor OS=Homo sapiens GN=VLDLR PE=1 SV=1	0	9.244	4.12371	3	12	3	1	873	96	4.79	High	High	High	Peak Found	Peak Found	High		1.134	0.551	1.895	1.19333	93.7	128.9	69.1	106.3	71.1	130.9	0.207	0	9.6	3	69	3
FALSE	High	IsMasterProtein	Q6NS36	Ferritin (Fragment) OS=Homo sapiens GN=FTH1 PE=2 SV=1	0	72.12	24.1379	6	164	6	1	232	26.2	6.52	High	High	High	High	High	High		1.155	1.199	1.126	1.16	92.8	91	94.1	107.2	109	105.9	12.594	0	75.18	6	767	6
FALSE	High	IsMasterProtein	chXi_P98172	Ephrin-B1 OS=Homo sapiens GN=EFNB1 PE=1 SV=1	0.002	2.281	5.20231	1	2	1	1	346	38	8.94	Peak Found	Not Found	Not Found	High	Not Found	Not Found		1.149			1.149	93.1			106.9			0.11	0	0	1	47	1
FALSE	High	IsMasterProtein	ch10u_Q7LGC8	Carbohydrate sulfotransferase 3 OS=Homo sapiens GN=CHST3 PE=1 SV=3	0.004	1.474	3.34029	1	2	1	1	479	54.7	8.59	Not Found	Not Found	High	Not Found	Not Found	Peak Found				1.134	1.134			93.7			106.3	0.077	0	1.61	1	0	1
FALSE	High	IsMasterProtein	A0A0D9SFP6	Tyrosine-protein kinase receptor OS=Homo sapiens GN=NTRK3 PE=1 SV=1	0	11.753	1.27315	1	14	1	1	864	97	6.68	High	High	High	High	High	High		1.117	1.117	1.106	1.11333	94.5	94.5	95	105.5	105.5	105	0.116	0	13.58	1	137	1
FALSE	High	IsMasterProtein	ch15i_O43570	Carbonic anhydrase 12 OS=Homo sapiens GN=CA12 PE=1 SV=1	0	23.61	14.6893	3	19	3	1	354	39.4	7.23	High	High	High	High	High	High		1.025	1.283	1.004	1.104	98.7	87.6	99.8	101.3	112.4	100.2	1.371	0	10.81	3	227	3
FALSE	High	IsMasterProtein	ch03u_Q9UQN3	Charged multivesicular body protein 2b OS=Homo sapiens GN=CHMP2B PE=1 SV=1	0.003	1.642	4.69484	1	2	1	1	213	23.9	8.76	Not Found	High	Not Found	Not Found	Peak Found	Not Found			1.08		1.08		96.2			103.8		0.179	0	0	1	25	1
FALSE	High	IsMasterProtein	ch05i_Q01581	Hydroxymethylglutaryl-CoA synthase, cytoplasmic OS=Homo sapiens GN=HMGCS1 PE=1 SV=2	0	22.832	13.4615	3	12	3	1	520	57.3	5.41	Not Found	Not Found	High	Not Found	Not Found	High				1.072	1.072			96.5			103.5	0.407	0	18.33	3	195	3
FALSE	High	IsMasterProtein	ch17i_Q9UBG0	C-type mannose receptor 2 OS=Homo sapiens GN=MRC2 PE=1 SV=2	0	55.723	5.6119	5	42	5	1	1479	166.6	5.83	High	High	High	High	High	High		1.069	1.079	1.012	1.05333	96.7	96.2	99.4	103.3	103.8	100.6	0.468	0	51.99	5	655	5
FALSE	High	IsMasterProtein	B5MD23	Tetraspanin OS=Homo sapiens GN=TSPAN9 PE=1 SV=1	0	8.402	5.53506	1	8	1	1	271	29.5	7.71	High	High	High	Peak Found	Peak Found	High		1.322	0.951	0.709	0.994	86.1	102.5	117	113.9	97.5	83	0.425	0	6.26	1	33	1
FALSE	High	IsMasterProtein	ch11u_A6NMH8	Tetraspanin OS=Homo sapiens GN=CD81 PE=1 SV=1	0	57.751	18.6131	3	50	3	1	274	29.8	6.92	High	High	High	High	High	High		0.929	0.943	0.977	0.949667	103.7	102.9	101.2	96.3	97.1	98.8	6.943	0	52.47	3	860	3
FALSE	High	IsMasterProtein	B0LPF3	Growth factor receptor-bound protein 2 OS=Homo sapiens GN=GRB2 PE=2 SV=1	0.001	3.704	6.45161	1	2	1	1	217	25.2	6.32	Not Found	High	Not Found	Not Found	Peak Found	Not Found			0.93		0.93		103.6			96.4		0.136	0	2.19	1	33	1
FALSE	High	IsMasterProtein	ch01u_P14324	Farnesyl pyrophosphate synthase OS=Homo sapiens GN=FDPS PE=1 SV=4	0.002	1.941	2.38663	1	2	1	1	419	48.2	6.15	Not Found	Not Found	Peak Found	Not Found	Not Found	High				0.923	0.923			104			96	0.105	0	0	1	0	1
FALSE	High	IsMasterProtein	ch02u_P35052	Glypican-1 OS=Homo sapiens GN=GPC1 PE=1 SV=2	0	311.289	36.3799	17	335	17	1	558	61.6	7.3	High	High	High	High	High	High		0.912	0.927	0.926	0.921667	104.6	103.8	103.8	95.4	96.2	96.2	28.552	0	524.18	16	4971	17
FALSE	High	IsMasterProtein	ch05u_Q9H1C7	Cysteine-rich and transmembrane domain-containing protein 1 OS=Homo sapiens GN=CYSTM1 PE=1 SV=1	0	14.191	11.3402	2	17	2	1	97	10.6	4.32	High	Peak Found	High	High	High	High		0.939	0.919	0.873	0.910333	103.2	104.2	106.8	96.8	95.8	93.2	99	0	13.22	2	136	2
FALSE	High	IsMasterProtein	A0A0U5LWB3	MHC class I antigen (Fragment) OS=Homo sapiens GN=HLA-C PE=3 SV=1	0	50.545	17.9487	3	24	2	1	273	31.6	5.82	Peak Found	High	High	High	Peak Found	High			0.903		0.903		105.1			94.9		0.311	0	27.73	1	141	3
FALSE	High	IsMasterProtein	A8K7T4	cDNA FLJ75774, highly similar to Homo sapiens lectin, mannose-binding 2 (LMAN2), mRNA OS=Homo sapiens PE=2 SV=1	0	23.856	12.3596	4	24	4	1	356	40.2	6.95	High	High	High	High	High	High		0.831	0.793	1.033	0.885667	109.2	111.5	98.4	90.8	88.5	101.6	0.931	0	17.34	4	291	4
FALSE	High	IsMasterProtein	ch09u_Q9NZZ3	Charged multivesicular body protein 5 OS=Homo sapiens GN=CHMP5 PE=1 SV=1	0	7.135	11.8721	2	13	2	1	219	24.6	4.83	High	High	High	High	Peak Found	High		0.793	0.91	0.851	0.851333	111.6	104.7	108	88.4	95.3	92	1.371	0	3.77	2	89	2
FALSE	High	IsMasterProtein	ch10i_Q8NG11	Tetraspanin-14 OS=Homo sapiens GN=TSPAN14 PE=1 SV=1	0	34.28	18.1481	6	65	6	1	270	30.7	6.84	High	High	High	High	High	High		0.851	0.835	0.864	0.85	108.1	109	107.3	91.9	91	92.7	4.179	0	47.66	6	762	6
FALSE	High	IsMasterProtein	ch02u_Q8WV92	MIT domain-containing protein 1 OS=Homo sapiens GN=MITD1 PE=1 SV=1	0	36.556	21.6867	5	31	5	1	249	29.3	8	High	High	High	Peak Found	High	High		0.834	0.802	0.888	0.841333	109	111	105.9	91	89	94.1	2.728	0	23.09	5	324	5
FALSE	High	IsMasterProtein	ch21i_P53801	Pituitary tumor-transforming gene 1 protein-interacting protein OS=Homo sapiens GN=PTTG1IP PE=1 SV=1	0	4.861	6.66667	1	4	1	1	180	20.3	8.79	Not Found	Peak Found	Not Found	Not Found	High	Not Found			0.841		0.841		108.6			91.4		0.334	0	2.3	1	33	1
FALSE	High	IsMasterProtein	Q6YHK3	CD109 antigen OS=Homo sapiens GN=CD109 PE=1 SV=2	0	218.185	14.2561	14	216	14	1	1445	161.6	5.85	High	High	High	High	High	High		0.82	0.843	0.833	0.832	109.9	108.5	109.1	90.1	91.5	90.9	1.649	0	281.54	14	3749	14
FALSE	High	IsMasterProtein	P02792	Ferritin light chain OS=Homo sapiens GN=FTL PE=1 SV=2	0	42.698	21.7143	4	73	4	1	175	20	5.78	High	High	High	High	High	High		0.796	0.848	0.849	0.831	111.3	108.2	108.2	88.7	91.8	91.8	2.831	0	63.57	4	932	4
FALSE	High	IsMasterProtein	ch02u_P62979	Ubiquitin-40S ribosomal protein S27a OS=Homo sapiens GN=RPS27A PE=1 SV=2	0	81.233	39.1026	7	153	7	1	156	18	9.64	High	High	High	High	High	High		0.822	0.848	0.816	0.828667	109.8	108.2	110.2	90.2	91.8	89.8	27.48	0	140.71	7	1898	7
FALSE	High	IsMasterProtein	B4DN31	cDNA FLJ55809 OS=Homo sapiens PE=2 SV=1	0	4.414	2.64317	1	5	1	1	454	51	8.87	High	High	High	High	Peak Found	Peak Found		0.799	0.858	0.819	0.825333	111.2	107.7	109.9	88.8	92.3	90.1	0.194	0	1.69	1	14	1
FALSE	High	IsMasterProtein	ch19i_O43633	Charged multivesicular body protein 2a OS=Homo sapiens GN=CHMP2A PE=1 SV=1	0	24.172	15.3153	3	17	3	1	222	25.1	5.97	High	High	High	Peak Found	High	Peak Found	Acetyl [N-Term]	0.718	0.889	0.838	0.815	116.4	105.9	108.8	83.6	94.1	91.2	2.162	0	17.72	2	284	3
FALSE	High	IsMasterProtein	D0W033	MHC class I antigen (Fragment) OS=Homo sapiens GN=HLA-A PE=3 SV=1	0	43.945	12.8205	2	16	1	1	273	31.6	5.94	Peak Found	High	High	High	Peak Found	High		0.762		0.852	0.807	113.5		108	86.5		92	0.501	0	27.73	1	107	2
FALSE	High	IsMasterProtein	P18827	Syndecan-1 OS=Homo sapiens GN=SDC1 PE=1 SV=3	0	13.782	5.48387	1	22	1	1	310	32.4	4.63	High	High	High	High	High	High		0.8	0.819	0.799	0.806	111.1	110	111.2	88.9	90	88.8	0.52	0	29.33	1	315	1
FALSE	High	IsMasterProtein	ch16i_P53990-5	Isoform 5 of IST1 homolog OS=Homo sapiens GN=IST1	0	20.326	7.91557	4	26	4	1	379	41.5	5.57	High	High	High	High	High	High		0.834	0.651	0.893	0.792667	109.1	121.1	105.7	90.9	78.9	94.3	0.968	0	27.85	4	245	4
FALSE	High	IsMasterProtein	E3WH17	Tyrosine-protein kinase receptor OS=Homo sapiens GN=SQSTM1-ALK PE=2 SV=1	0	5.321	1.35135	1	8	1	1	814	89.9	7.55	Peak Found	Peak Found	High	High	High	High		1.053	0.714	0.577	0.781333	97.4	116.7	126.8	102.6	83.3	73.2	0.11	0	0	1	30	1
FALSE	High	IsMasterProtein	ch04u_D6RAX7	COP9 constitutive photomorphogenic-like protein subunit 4 isoform 2 OS=Homo sapiens GN=COPS4 PE=1 SV=1	0	17.813	8.57143	3	22	3	1	420	47.7	6.43	High	High	High	Not Found	Peak Found	Peak Found		0.01	0.075	2.219	0.768	200	186.1	62.1		13.9	137.9	0.425	0	23.45	3	294	3
FALSE	High	IsMasterProtein	ch21u_O00764	Pyridoxal kinase OS=Homo sapiens GN=PDXK PE=1 SV=1	0	8.635	5.44872	1	2	1	1	312	35.1	6.13	Not Found	Not Found	High	Not Found	Not Found	Peak Found				0.759	0.759			113.7			86.3	0.122	0	2.84	1	88	1
FALSE	High	IsMasterProtein	A0A024R5F9	UDP-GlcNAc:betaGal beta-1,3-N-acetylglucosaminyltransferase 6, isoform CRA_a OS=Homo sapiens GN=B3GNT6 PE=4 SV=1	0	14.87	3.85542	1	8	1	1	415	47.1	7.2	Not Found	High	Not Found	Not Found	High	Not Found			0.744		0.744		114.6			85.4		0.259	0	10.85	1	275	1
FALSE	High	IsMasterProtein	Q9H444	Charged multivesicular body protein 4b OS=Homo sapiens GN=CHMP4B PE=1 SV=1	0	5.338	6.25	1	4	1	1	224	24.9	4.82	High	High	Not Found	Peak Found	Peak Found	Not Found		0.792	0.657		0.7245	111.6	120.7		88.4	79.3		0.179	0	5.21	1	80	1
FALSE	High	IsMasterProtein	Q99816	Tumor susceptibility gene 101 protein OS=Homo sapiens GN=TSG101 PE=1 SV=2	0	12.474	3.07692	1	8	1	1	390	43.9	6.46	High	Peak Found	Peak Found	High	High	High		0.766	0.608	0.781	0.718333	113.3	124.4	112.3	86.7	75.6	87.7	0.274	0	11.97	1	167	1
FALSE	High	IsMasterProtein	B2R7P8	cDNA, FLJ93545, highly similar to Homo sapiens 5-aminoimidazole-4-carboxamide ribonucleotide formyltransferase/IMP cyclohydrolase (ATIC), mRNA OS=Homo sapiens PE=2 SV=1	0	7.342	4.72973	2	4	2	1	592	64.6	6.8	Not Found	High	High	Not Found	Peak Found	Not Found			0.715		0.715		116.6			83.4		0.129	0	4.77	2	44	2
FALSE	High	IsMasterProtein	Q59ES3	Amino acid transporter (Fragment) OS=Homo sapiens PE=2 SV=1	0	20.734	10.219	4	28	1	1	548	57.4	5.38	High	High	High	Peak Found	Peak Found	Not Found		1.137	0.285	0.697	0.706333	93.6	155.7	117.9	106.4	44.3	82.1	0.52	3	29.07	4	303	4
FALSE	High	IsMasterProtein	ch11i_P08195-4	Isoform 4 of 4F2 cell-surface antigen heavy chain OS=Homo sapiens GN=SLC3A2	0	170.883	31.9213	16	223	16	1	661	71.1	4.97	High	High	High	High	High	High		0.633	0.597	0.713	0.647667	122.5	125.2	116.8	77.5	74.8	83.2	7.111	0	287.5	16	2811	16
FALSE	High	IsMasterProtein	ch03u_O15162	Phospholipid scramblase 1 OS=Homo sapiens GN=PLSCR1 PE=1 SV=1	0	13.344	4.08805	1	12	1	1	318	35	4.94	High	High	High	High	High	High		0.534	0.628	0.749	0.637	130.4	122.9	114.3	69.6	77.1	85.7	0.52	0	13.77	1	223	1
FALSE	High	IsMasterProtein	A0A024R5U5	ADAM metallopeptidase domain 10, isoform CRA_b OS=Homo sapiens GN=ADAM10 PE=4 SV=1	0	30.152	7.35294	5	42	5	1	748	84.1	7.77	High	High	High	High	High	High		0.57	0.749	0.56	0.626333	127.4	114.4	128.2	72.6	85.6	71.8	0.492	0	39.77	5	432	5
FALSE	High	IsMasterProtein	B2R7D2	cDNA, FLJ93389, highly similar to Homo sapiens multiple inositol polyphosphate histidine phosphatase, 1 (MINPP1), mRNA OS=Homo sapiens PE=2 SV=1	0	9.307	2.25873	1	14	1	1	487	55.1	7.97	High	High	Peak Found	High	High	High		0.629	0.579	0.62	0.609333	122.8	126.7	123.4	77.2	73.3	76.6	0.179	0	15.66	1	168	1
FALSE	High	IsMasterProtein	Q5H9N4	Putative uncharacterized protein DKFZp686L20222 OS=Homo sapiens GN=DKFZp686L20222 PE=3 SV=1	0.002	2.13	3.30033	1	4	1	1	303	34.8	8.95	High	High	Not Found	Peak Found	Peak Found	Not Found		0.621	0.591		0.606	123.4	125.7		76.6	74.3		0.116	0	4.64	1	34	1
FALSE	High	IsMasterProtein	A0A024R1K7	Tyrosine 3-monooxygenase/tryptophan 5-monooxygenase activation protein, eta polypeptide, isoform CRA_b OS=Homo sapiens GN=YWHAH PE=3 SV=1	0	40.252	26.8293	8	83	5	1	246	28.2	4.84	High	High	High	Peak Found	Peak Found	Peak Found	Acetyl [N-Term]	0.521	0.632	0.653	0.602	131.5	122.6	121	68.5	77.4	79	2.594	0	73.82	7	522	8
FALSE	High	IsMasterProtein	O00469-2	Isoform 2 of Procollagen-lysine,2-oxoglutarate 5-dioxygenase 2 OS=Homo sapiens GN=PLOD2	0	66.232	13.9842	8	61	8	1	758	87	6.71	High	High	High	High	High	High		0.719	0.512	0.527	0.586	116.3	132.3	131	83.7	67.7	69	0.848	0	82.24	8	1064	8
FALSE	High	IsMasterProtein	ch09i_P27105	Erythrocyte band 7 integral membrane protein OS=Homo sapiens GN=STOM PE=1 SV=3	0	46.339	23.2639	7	59	7	1	288	31.7	7.88	High	High	High	High	High	High		0.585	0.568	0.582	0.578333	126.2	127.5	126.4	73.8	72.5	73.6	2.594	0	50.21	7	873	7
FALSE	High	IsMasterProtein	ch10u_P61163	Alpha-centractin OS=Homo sapiens GN=ACTR1A PE=1 SV=1	0.001	3.458	4.25532	1	2	1	1	376	42.6	6.64	High	Not Found	Not Found	Peak Found	Not Found	Not Found		0.573			0.573	127.2			72.8			0.105	0	0	1	44	1
FALSE	High	IsMasterProtein	P55786	Puromycin-sensitive aminopeptidase OS=Homo sapiens GN=NPEPPS PE=1 SV=2	0	14.203	3.9173	3	12	3	1	919	103.2	5.72	High	High	High	Not Found	Peak Found	High			0.324	0.818	0.571		151	110		49	90	0.175	0	12.96	3	106	3
FALSE	High	IsMasterProtein	ch16i_Q9UN37	Vacuolar protein sorting-associated protein 4A OS=Homo sapiens GN=VPS4A PE=1 SV=1	0	10.228	8.92449	3	12	3	1	437	48.9	7.8	High	High	High	High	Peak Found	High		0.509	0.507	0.673	0.563	132.5	132.7	119.6	67.5	67.3	80.4	0.359	0	13.5	3	91	3
FALSE	High	IsMasterProtein	B7Z3K9	Fructose-bisphosphate aldolase OS=Homo sapiens PE=2 SV=1	0	132.2	15.5211	4	92	3	1	451	48.4	8.07	High	High	High	High	High	High		0.536		0.547	0.5415	130.2		129.3	69.8		70.7	1.593	0	143.82	4	2553	4
FALSE	High	IsMasterProtein	P31689	DnaJ homolog subfamily A member 1 OS=Homo sapiens GN=DNAJA1 PE=1 SV=2	0	6.147	3.27456	1	7	1	1	397	44.8	7.08	High	Peak Found	Peak Found	High	High	High		0.491	0.528	0.59	0.536333	134.2	130.9	125.8	65.8	69.1	74.2	0.233	0	8.42	1	28	1
FALSE	High	IsMasterProtein	Q5JR05	Rho-related GTP-binding protein RhoC OS=Homo sapiens GN=RHOC PE=4 SV=1	0	7.307	13.0653	2	10	2	1	199	22	7.91	High	High	High	Peak Found	Not Found	Not Found		0.532			0.532	130.5			69.5			0.468	0	6.18	2	80	2
FALSE	High	IsMasterProtein	chXi_Q16576-2	Isoform 2 of Histone-binding protein RBBP7 OS=Homo sapiens GN=RBBP7	0	4.31	3.41151	1	2	1	1	469	52.3	5.27	Not Found	High	Not Found	Not Found	Peak Found	Not Found			0.532		0.532		130.6			69.4		0.11	0	2.12	1	50	1
FALSE	High	IsMasterProtein	ch12i_G8JLH6	Tetraspanin (Fragment) OS=Homo sapiens GN=CD9 PE=1 SV=1	0	49.029	10.5263	4	145	4	1	228	25.4	6.52	High	High	High	High	High	High		0.545	0.527	0.521	0.531	129.5	131	131.5	70.5	69	68.5	26.826	0	176.42	4	1581	4
FALSE	High	IsMasterProtein	ch14i_A0A087X1Z3	Proteasome activator complex subunit 2 OS=Homo sapiens GN=PSME2 PE=1 SV=1	0	6.992	16.1417	3	12	3	1	254	29.1	6.71	High	High	High	Peak Found	Peak Found	Peak Found		0.3	0.667	0.609	0.525333	153.8	120	124.3	46.2	80	75.7	0.585	0	4.09	3	30	3
FALSE	High	IsMasterProtein	ch03i_P61225	Ras-related protein Rap-2b OS=Homo sapiens GN=RAP2B PE=1 SV=1	0	8.348	11.4754	2	10	2	1	183	20.5	4.81	High	Peak Found	Peak Found	High	High	High		0.498	0.531	0.523	0.517333	133.5	130.6	131.3	66.5	69.4	68.7	0.874	0	8.31	2	66	2
FALSE	High	IsMasterProtein	P49327	Fatty acid synthase OS=Homo sapiens GN=FASN PE=1 SV=3	0	451.167	26.3242	48	377	48	1	2511	273.3	6.44	High	High	High	High	High	High		0.509	0.521	0.511	0.513667	132.6	131.5	132.4	67.4	68.5	67.6	2.928	0	512.18	48	4865	48
FALSE	High	IsMasterProtein	Q12765-2	Isoform 2 of Secernin-1 OS=Homo sapiens GN=SCRN1	0	8.411	3.91705	1	6	1	1	434	48.7	4.78	High	Not Found	High	Peak Found	Not Found	High		0.522		0.499	0.5105	131.4		133.4	68.6		66.6	0.194	0	7.03	1	101	1
FALSE	High	IsMasterProtein	P23284	Peptidyl-prolyl cis-trans isomerase B OS=Homo sapiens GN=PPIB PE=1 SV=2	0	18.546	25	5	29	5	1	216	23.7	9.41	High	High	High	High	High	High		0.231	0.237	1.056	0.508	162.5	161.7	97.3	37.5	38.3	102.7	1.371	0	15.87	5	265	5
FALSE	High	IsMasterProtein	ch05u_Q9Y6G5	COMM domain-containing protein 10 OS=Homo sapiens GN=COMMD10 PE=1 SV=1	0.002	1.979	4.45545	1	1	1	1	202	23	6.54	High	Not Found	Not Found	Peak Found	Not Found	Not Found	Acetyl [N-Term]	0.508			0.508	132.7			67.3			0.194	0			14	1
FALSE	High	IsMasterProtein	D3DTP7	Phospholipid scramblase OS=Homo sapiens GN=hCG_1987383 PE=3 SV=1	0	16.534	8.57143	2	16	2	1	350	37.7	7.81	High	High	High	High	High	High		0.474	0.462	0.57	0.502	135.7	136.8	127.4	64.3	63.2	72.6	0.848	0	12.92	2	129	2
FALSE	High	IsMasterProtein	ch12u_Q07954	Prolow-density lipoprotein receptor-related protein 1 OS=Homo sapiens GN=LRP1 PE=1 SV=2	0	122.701	4.64349	17	91	17	1	4544	504.3	5.39	High	High	High	High	High	High		0.483	0.502	0.492	0.492333	134.9	133.1	134.1	65.1	66.9	65.9	0.239	0	107.38	17	1311	17
FALSE	High	IsMasterProtein	ch12u_F8VXU5	Vacuolar protein sorting-associated protein 29 OS=Homo sapiens GN=VPS29 PE=1 SV=1	0	11.407	10.7477	2	8	2	1	214	24	8.18	High	Not Found	Peak Found	Peak Found	Not Found	High		0.49			0.49	134.2			65.8			0.778	0	4.69	2	67	2
FALSE	High	IsMasterProtein	B7Z6L0	Annexin OS=Homo sapiens PE=2 SV=1	0	62.549	15.3719	8	43	8	1	605	65.6	8.27	High	High	High	High	High	High		0.485	0.489	0.487	0.487	134.7	134.3	134.5	65.3	65.7	65.5	1.471	0	58.87	8	688	8
FALSE	High	IsMasterProtein	P28838	Cytosol aminopeptidase OS=Homo sapiens GN=LAP3 PE=1 SV=3	0	22.092	18.1118	7	22	7	1	519	56.1	7.93	High	High	High	Peak Found	Peak Found	High		0.557	0.434	0.46	0.483667	128.4	139.4	137	71.6	60.6	63	0.565	0	18.58	7	56	7
FALSE	High	IsMasterProtein	A8K7D9	Importin subunit alpha OS=Homo sapiens PE=2 SV=1	0	8.05	7.18336	2	4	2	1	529	57.8	5.4	Not Found	High	Not Found	Not Found	Peak Found	Not Found			0.479		0.479		135.2			64.8		0.172	0	4.88	2	65	2
FALSE	High	IsMasterProtein	ch08i_Q9UK41-2	Isoform 2 of Vacuolar protein sorting-associated protein 28 homolog OS=Homo sapiens GN=VPS28	0	15.81	14.1631	2	10	2	1	233	26.4	7.72	High	High	High	Peak Found	Not Found	Peak Found		0.697	0.01	0.685	0.464	117.8	200	118.7	82.2		81.3	0.359	0	13.28	2	214	2
FALSE	High	IsMasterProtein	ch01u_Q5VW32	BRO1 domain-containing protein BROX OS=Homo sapiens GN=BROX PE=1 SV=1	0	53.267	24.8175	6	37	6	1	411	46.4	7.65	High	High	High	High	Peak Found	High		0.502	0.431	0.457	0.463333	133.1	139.8	137.3	66.9	60.2	62.7	1.555	0	42.45	6	644	6
FALSE	High	IsMasterProtein	ch05i_O75340	Programmed cell death protein 6 OS=Homo sapiens GN=PDCD6 PE=1 SV=1	0	32.434	25.1309	6	53	6	1	191	21.9	5.4	High	High	High	High	High	High		0.465	0.465	0.46	0.463333	136.6	136.5	137	63.4	63.5	63	5.579	0	31.6	6	332	6
FALSE	High	IsMasterProtein	Q02809-2	Isoform 2 of Procollagen-lysine,2-oxoglutarate 5-dioxygenase 1 OS=Homo sapiens GN=PLOD1	0	69.881	16.9251	9	60	9	1	774	88.2	7.11	High	High	High	High	High	High		0.517	0.384	0.466	0.455667	131.8	144.5	136.4	68.2	55.5	63.6	0.943	0	62.08	9	332	9
FALSE	High	IsMasterProtein	B2R5M8	Isocitrate dehydrogenase [NADP] OS=Homo sapiens PE=2 SV=1	0	36.736	20.0483	7	36	7	1	414	46.6	7.01	High	High	High	High	High	High		0.433	0.484	0.443	0.453333	139.6	134.8	138.6	60.4	65.2	61.4	0.848	0	32.63	7	635	7
FALSE	High	IsMasterProtein	ch08u_Q7Z5G4	Golgin subfamily A member 7 OS=Homo sapiens GN=GOLGA7 PE=1 SV=2	0	9.248	16.0584	2	14	2	1	137	15.8	7.05	High	High	High	Peak Found	High	Peak Found		0.411	0.498	0.444	0.451	141.7	133.5	138.5	58.3	66.5	61.5	0.874	0	5.82	2	101	2
FALSE	High	IsMasterProtein	P11717	Cation-independent mannose-6-phosphate receptor OS=Homo sapiens GN=IGF2R PE=1 SV=3	0	94.139	9.31353	18	87	18	1	2491	274.2	5.94	High	High	High	High	High	High		0.498	0.38	0.454	0.444	133.5	144.9	137.6	66.5	55.1	62.4	0.418	0	98.32	18	703	18
FALSE	High	IsMasterProtein	ch03u_Q13740	CD166 antigen OS=Homo sapiens GN=ALCAM PE=1 SV=2	0	7.025	4.28816	2	12	2	1	583	65.1	6.25	High	High	High	Peak Found	Peak Found	Peak Found		0.45	0.394	0.481	0.441667	137.9	143.4	135.1	62.1	56.6	64.9	0.155	0	6.99	2	45	2
FALSE	High	IsMasterProtein	ch17u_A0A087WVQ6	Clathrin heavy chain OS=Homo sapiens GN=CLTC PE=1 SV=1	0	248.415	22.8708	30	215	30	1	1679	191.9	5.69	High	High	High	High	High	High	Acetyl [N-Term]	0.486	0.708	0.128	0.440667	134.6	117.1	177.2	65.4	82.9	22.8	1.976	0	293.75	29	3054	30
FALSE	High	IsMasterProtein	ch01u_Q9UBV8	Peflin OS=Homo sapiens GN=PEF1 PE=1 SV=1	0.002	2.612	3.52113	1	3	1	1	284	30.4	6.54	Not Found	High	High	Not Found	Peak Found	Peak Found			0.522	0.351	0.4365		131.4	148.1		68.6	51.9	0.259	0	0	1	0	1
FALSE	High	IsMasterProtein	ch11u_P48509	CD151 antigen OS=Homo sapiens GN=CD151 PE=1 SV=3	0.001	2.982	3.95257	1	6	1	1	253	28.3	7.47	High	High	High	Peak Found	Peak Found	Peak Found		0.405	0.431	0.41	0.415333	142.3	139.8	141.8	57.7	60.2	58.2	0.179	0	0	1	39	1
FALSE	High	IsMasterProtein	ch19u_Q99426	Tubulin-folding cofactor B OS=Homo sapiens GN=TBCB PE=1 SV=2	0.001	3.028	6.55738	1	2	1	1	244	27.3	5.15	Not Found	High	Not Found	Not Found	Peak Found	Not Found			0.412		0.412		141.6			58.4		0.155	0	2.13	1	13	1
FALSE	High	IsMasterProtein	ch01u_Q9UHV9	Prefoldin subunit 2 OS=Homo sapiens GN=PFDN2 PE=1 SV=1	0	7.877	9.09091	1	8	1	1	154	16.6	6.58	High	High	High	Peak Found	High	Peak Found		0.401	0.386	0.448	0.411667	142.7	144.3	138.1	57.3	55.7	61.9	0.468	0	3.9	1	132	1
FALSE	High	IsMasterProtein	ch16i_P15559	NAD(P)H dehydrogenase [quinone] 1 OS=Homo sapiens GN=NQO1 PE=1 SV=1	0	40.215	22.2628	6	47	6	1	274	30.8	8.88	High	High	High	High	High	High		0.406	0.401	0.422	0.409667	142.3	142.7	140.6	57.7	57.3	59.4	4.878	0	45.98	6	254	5
FALSE	Medium	IsMasterProtein	A8K556	cDNA FLJ78217 OS=Homo sapiens PE=2 SV=1	0.014	1.185	1.68067	1	6	1	1	357	40.3	8.15	High	High	High	Peak Found	Peak Found	Peak Found		0.418	0.395	0.412	0.408333	141	143.3	141.6	59	56.7	58.4	0.166	0	0	1	44	1
FALSE	High	IsMasterProtein	Q6PKA6	ALDH3A1 protein (Fragment) OS=Homo sapiens GN=ALDH3A1 PE=2 SV=1	0	42.104	12.8906	5	40	5	1	512	57.5	7.28	High	High	High	High	High	High		0.352	0.407	0.437	0.398667	147.9	142.1	139.2	52.1	57.9	60.8	1.031	0	54.18	5	489	5
FALSE	High	IsMasterProtein	Q14344	Guanine nucleotide-binding protein subunit alpha-13 OS=Homo sapiens GN=GNA13 PE=1 SV=2	0	12.582	5.57029	2	18	1	1	377	44	8	High	High	High	Peak Found	Peak Found	Peak Found		0.3	0.508	0.383	0.397	153.8	132.6	144.6	46.2	67.4	55.4	0.318	0	20.64	2	277	2
FALSE	High	IsMasterProtein	Q92930	Ras-related protein Rab-8B OS=Homo sapiens GN=RAB8B PE=1 SV=2	0	21.236	17.3913	3	36	1	1	207	23.6	9.07	High	High	Not Found	Peak Found	Peak Found	Not Found		0.358	0.416		0.387	147.3	141.2		52.7	58.8		1.054	0	30.72	3	355	3
FALSE	High	IsMasterProtein	ch07i_P12273	Prolactin-inducible protein OS=Homo sapiens GN=PIP PE=1 SV=1	0.001	2.914	7.53425	1	2	1	1	146	16.6	8.05	High	Not Found	Not Found	Peak Found	Not Found	Not Found		0.385			0.385	144.4			55.6			0.212	0	0	1	38	1
FALSE	High	IsMasterProtein	ch14u_P62330	ADP-ribosylation factor 6 OS=Homo sapiens GN=ARF6 PE=1 SV=2	0.002	1.678	6.28571	1	6	1	1	175	20.1	8.95	High	High	High	Peak Found	Peak Found	Peak Found		0.313	0.455	0.375	0.381	152.3	137.5	145.5	47.7	62.5	54.5	0.292	0	0	1	52	1
FALSE	High	IsMasterProtein	ch02u_P27348	14-3-3 protein theta OS=Homo sapiens GN=YWHAQ PE=1 SV=1	0	94.447	34.2857	11	143	9	1	245	27.7	4.78	High	High	High	High	High	High		0.384	0.37	0.37	0.374667	144.5	145.9	146	55.5	54.1	54	10.365	0	144.04	11	1877	11
FALSE	High	IsMasterProtein	ch14i_Q8NDC0	MAPK-interacting and spindle-stabilizing protein-like OS=Homo sapiens GN=MAPK1IP1L PE=1 SV=4	0	6.687	6.93878	1	4	1	1	245	24.3	5.62	High	High	High	Peak Found	Peak Found	Peak Found	Acetyl [N-Term]	0.406	0.339	0.367	0.370667	142.2	149.3	146.4	57.8	50.7	53.6	99	0			112	1
FALSE	High	IsMasterProtein	ch10u_O75436	Vacuolar protein sorting-associated protein 26A OS=Homo sapiens GN=VPS26A PE=1 SV=2	0	13.008	9.17431	2	8	2	1	327	38.1	6.57	High	High	High	High	Not Found	Not Found		0.37			0.37	146			54			0.233	0	11.14	2	164	2
FALSE	High	IsMasterProtein	A8K3H8	cDNA FLJ77680, highly similar to Homo sapiens protein phosphatase 2 (formerly 2A), regulatory subunit A (PR 65), alpha isoform (PPP2R1A), mRNA OS=Homo sapiens PE=2 SV=1	0	6.321	3.39559	1	2	1	1	589	65.3	5.11	High	Not Found	Not Found	Peak Found	Not Found	Not Found		0.37			0.37	146			54			0.061	0	2.26	1	25	1
FALSE	High	IsMasterProtein	B4DH02	cDNA FLJ50510, highly similar to Heat shock 70 kDa protein 4 OS=Homo sapiens PE=2 SV=1	0	107.394	24.5238	14	152	13	1	840	94.3	5.19	High	High	High	High	High	High		0.398	0.507	0.199	0.368	143	132.7	166.8	57	67.3	33.2	1.395	1	192.1	14	2057	14
FALSE	High	IsMasterProtein	B4DJ30	cDNA FLJ61290, highly similar to Neutral alpha-glucosidase AB OS=Homo sapiens PE=2 SV=1	0.001	2.883	3.11558	2	9	2	1	995	112.9	6.06	High	High	High	Peak Found	Peak Found	Peak Found		0.453	0.287	0.354	0.364667	137.6	155.5	147.7	62.4	44.5	52.3	0.086	0	0	2	17	2
FALSE	High	IsMasterProtein	P12931-2	Isoform 2 of Proto-oncogene tyrosine-protein kinase Src OS=Homo sapiens GN=SRC	0	14.108	7.19557	3	11	3	1	542	60.6	7.84	High	Peak Found	Peak Found	High	High	High		0.348	0.376	0.324	0.349333	148.4	145.4	151.1	51.6	54.6	48.9	0.346	0	4.2	3	90	3
FALSE	High	IsMasterProtein	B2R5I8	cDNA, FLJ92490, highly similar to Homo sapiens RAB32, member RAS oncogene family (RAB32), mRNA OS=Homo sapiens PE=2 SV=1	0.002	2.68	4.88889	1	2	1	1	225	24.9	6.68	High	Not Found	Not Found	Peak Found	Not Found	Not Found		0.344			0.344	148.8			51.2			0.155	0	1.72	1	33	1
FALSE	High	IsMasterProtein	Q4LE36	ACLY variant protein (Fragment) OS=Homo sapiens GN=ACLY variant protein PE=2 SV=1	0	449.738	34.2128	36	695	36	1	1137	124.5	8.03	High	High	High	High	High	High		0.361	0.328	0.342	0.343667	146.9	150.6	149	53.1	49.4	51	13.758	0	840.45	36	8034	36
FALSE	High	IsMasterProtein	ch09u_P00352	Retinal dehydrogenase 1 OS=Homo sapiens GN=ALDH1A1 PE=1 SV=2	0	777.381	76.2475	35	1016	21	1	501	54.8	6.73	High	High	High	High	High	High	Acetyl [N-Term]	0.34	0.341	0.34	0.340333	149.3	149.1	149.3	50.7	50.9	50.7	15316.4	21	1291.93	34	14190	35
FALSE	Medium	IsMasterProtein	ch17i_I3L504	Eukaryotic translation initiation factor 5A-1 OS=Homo sapiens GN=EIF5A PE=1 SV=1	0.013	1.25	6.45161	1	2	1	1	186	20.5	5.25	Not Found	High	Not Found	Not Found	Peak Found	Not Found			0.339		0.339		149.4			50.6		0.292	0	0	1	14	1
FALSE	High	IsMasterProtein	P63000-2	Isoform B of Ras-related C3 botulinum toxin substrate 1 OS=Homo sapiens GN=RAC1	0	32.23	28.91	6	70	6	1	211	23.5	8.63	High	High	High	High	High	High		0.341	0.348	0.327	0.338667	149.2	148.4	150.7	50.8	51.6	49.3	9	0	36.48	6	480	6
FALSE	High	IsMasterProtein	P12004	Proliferating cell nuclear antigen OS=Homo sapiens GN=PCNA PE=1 SV=1	0	9.316	14.9425	3	9	3	1	261	28.8	4.69	High	High	High	High	Peak Found	Peak Found		0.499	0.204	0.305	0.336	133.4	166.1	153.3	66.6	33.9	46.7	0.438	0	5.29	3	124	3
FALSE	High	IsMasterProtein	Q8WVX7	Ribosomal protein S19 (Fragment) OS=Homo sapiens PE=2 SV=1	0.004	1.552	5.73248	1	2	1	1	157	17.3	10.52	High	Not Found	Not Found	Peak Found	Not Found	Not Found		0.334			0.334	149.9			50.1			0.194	0	0	1	0	1
FALSE	High	IsMasterProtein	P51148-2	Isoform 2 of Ras-related protein Rab-5C OS=Homo sapiens GN=RAB5C	0	23.298	14.8594	3	32	3	1	249	27	8.66	High	High	High	High	High	High		0.327	0.322	0.315	0.321333	150.7	151.2	152.1	49.3	48.8	47.9	1.054	0	34.8	3	467	3
FALSE	High	IsMasterProtein	ch09i_P13716-2	Isoform 2 of Delta-aminolevulinic acid dehydratase OS=Homo sapiens GN=ALAD	0	4.568	2.78552	1	6	1	1	359	39	7.65	Not Found	High	High	Not Found	Peak Found	Not Found			0.321		0.321		151.4			48.6		0.145	0	8.17	1	141	1
FALSE	High	IsMasterProtein	Q16531	DNA damage-binding protein 1 OS=Homo sapiens GN=DDB1 PE=1 SV=1	0	18.185	4.21053	4	22	4	1	1140	126.9	5.26	High	High	High	Peak Found	Peak Found	Peak Found		0.392	0.265	0.293	0.316667	143.7	158.1	154.7	56.3	41.9	45.3	0.163	0	24.57	4	168	4
FALSE	High	IsMasterProtein	ch06i_Q9NP79	Vacuolar protein sorting-associated protein VTA1 homolog OS=Homo sapiens GN=VTA1 PE=1 SV=1	0	5.287	4.56026	1	4	1	1	307	33.9	6.29	High	High	High	Peak Found	Peak Found	Peak Found	Acetyl [N-Term]	0.308	0.328	0.309	0.315	152.9	150.6	152.8	47.1	49.4	47.2	0.425	0			84	1
FALSE	High	IsMasterProtein	V9HW43	Epididymis secretory protein Li 102 OS=Homo sapiens GN=HEL-S-102 PE=2 SV=1	0	16.942	13.1707	2	18	2	1	205	22.8	6.4	High	High	High	High	High	High		0.285	0.304	0.335	0.308	155.7	153.4	149.8	44.3	46.6	50.2	0.701	0	11.36	2	293	2
FALSE	High	IsMasterProtein	ch03i_Q8WUM4-2	Isoform 2 of Programmed cell death 6-interacting protein OS=Homo sapiens GN=PDCD6IP	0	72.491	16.7239	11	50	11	1	873	96.7	6.52	High	High	High	Peak Found	High	High	Acetyl [N-Term]	0.247	0.3	0.369	0.305333	160.4	153.9	146.1	39.6	46.1	53.9	0.874	0	52.7	10	601	11
FALSE	High	IsMasterProtein	chXi_P11413-2	Isoform Long of Glucose-6-phosphate 1-dehydrogenase OS=Homo sapiens GN=G6PD	0	118.597	34.0463	16	140	16	1	561	63.8	6.89	High	High	High	High	High	High	Acetyl [N-Term]	0.291	0.349	0.273	0.304333	154.9	148.3	157.1	45.1	51.7	42.9	4.012	0	126.22	15	1444	16
FALSE	High	IsMasterProtein	B2R4D5	Actin-related protein 2/3 complex subunit 3 OS=Homo sapiens PE=2 SV=1	0	5.827	10.1124	2	16	2	1	178	20.5	8.59	High	High	High	High	High	High		0.295	0.316	0.297	0.302667	154.4	152	154.2	45.6	48	45.8	1.154	0	1.65	2	110	2
FALSE	High	IsMasterProtein	Q6LES2	Annexin (Fragment) OS=Homo sapiens GN=ANXA4 PE=2 SV=1	0	17.239	18.0685	5	21	5	1	321	36.1	6.13	High	High	High	Peak Found	Peak Found	Peak Found		0.303	0.297	0.295	0.298333	153.4	154.2	154.4	46.6	45.8	45.6	0.616	0	15.97	5	217	5
FALSE	High	IsMasterProtein	A8K168	Malic enzyme OS=Homo sapiens PE=2 SV=1	0	20.443	7.51748	2	8	2	1	572	64.1	6.13	High	High	High	Peak Found	Peak Found	Peak Found		0.261	0.314	0.306	0.293667	158.6	152.2	153.2	41.4	47.8	46.8	0.155	0	15.16	2	238	2
FALSE	High	IsMasterProtein	O15511-2	Isoform 2 of Actin-related protein 2/3 complex subunit 5 OS=Homo sapiens GN=ARPC5	0	10.479	11.6883	2	22	2	1	154	16.6	6.02	High	High	High	High	High	High		0.288	0.297	0.296	0.293667	155.2	154.2	154.4	44.8	45.8	45.6	0.778	0	20.75	2	274	2
FALSE	High	IsMasterProtein	ch01u_P48507	Glutamate--cysteine ligase regulatory subunit OS=Homo sapiens GN=GCLM PE=1 SV=1	0	22.702	21.1679	4	24	4	1	274	30.7	6.02	High	High	High	Peak Found	Peak Found	Peak Found		0.291	0.318	0.269	0.292667	154.9	151.7	157.6	45.1	48.3	42.4	1.424	0	17.99	4	230	4
FALSE	High	IsMasterProtein	A0A024RDL9	Phosphoserine phosphatase, isoform CRA_b OS=Homo sapiens GN=PSPH PE=4 SV=1	0	5.508	5.55556	1	6	1	1	252	28.1	7.37	High	High	High	Peak Found	Peak Found	Peak Found		0.313	0.279	0.279	0.290333	152.4	156.4	156.3	47.6	43.6	43.7	0.155	0	7.6	1	87	1
FALSE	High	IsMasterProtein	A0A024R4N0	HCG1640809, isoform CRA_b OS=Homo sapiens GN=hCG_1640809 PE=4 SV=1	0	5.674	4.96894	2	17	2	1	322	35.3	8.15	High	High	High	High	High	High		0.263	0.325	0.28	0.289333	158.4	151	156.2	41.6	49	43.8	0.874	0	10.9	2	115	2
FALSE	High	IsMasterProtein	ch10u_A0A0A0MSS8	Aldo-keto reductase family 1 member C3 OS=Homo sapiens GN=AKR1C3 PE=1 SV=1	0	50.95	38.6997	9	56	6	1	323	36.8	7.94	High	High	High	Peak Found	Peak Found	Peak Found		0.272	0.341	0.255	0.289333	157.2	149.1	159.4	42.8	50.9	40.6	2.511	2	73.91	9	696	8
FALSE	High	IsMasterProtein	ch11i_P37837	Transaldolase OS=Homo sapiens GN=TALDO1 PE=1 SV=2	0	56.13	28.1899	9	63	9	1	337	37.5	6.81	High	High	High	High	High	Peak Found		0.293	0.303	0.268	0.288	154.6	153.5	157.7	45.4	46.5	42.3	2.831	0	65.44	9	623	9
FALSE	High	IsMasterProtein	ch19i_P12955	Xaa-Pro dipeptidase OS=Homo sapiens GN=PEPD PE=1 SV=3	0	86.335	25.5578	9	77	9	1	493	54.5	6	High	High	High	High	High	High	Acetyl [N-Term]	0.293	0.286	0.281	0.286667	154.7	155.5	156.1	45.3	44.5	43.9	1.894	0	95.33	8	1439	9
FALSE	High	IsMasterProtein	P23142	Fibulin-1 OS=Homo sapiens GN=FBLN1 PE=1 SV=4	0	37.443	9.53058	4	47	1	1	703	77.2	5.22	High	High	High	High	Peak Found	High		0.293	0.301	0.263	0.285667	154.7	153.8	158.3	45.3	46.2	41.7	0.528	0	58.82	4	493	4
FALSE	High	IsMasterProtein	ch20i_P60981	Destrin OS=Homo sapiens GN=DSTN PE=1 SV=3	0	22.117	13.9394	2	17	2	1	165	18.5	7.85	High	High	High	High	High	High	Acetyl [N-Term]	0.282	0.285	0.29	0.285667	156	155.7	155.1	44	44.3	44.9	1.031	0	10.09	1	338	2
FALSE	High	IsMasterProtein	ch11i_Q8IX04	Ubiquitin-conjugating enzyme E2 variant 3 OS=Homo sapiens GN=UEVLD PE=1 SV=2	0.001	3.11	4.67091	2	8	2	1	471	52.2	7.09	High	High	High	Peak Found	Not Found	Peak Found		0.412	0.01	0.432	0.284667	141.7	200	139.7	58.3		60.3	0.16	0	6.71	2	24	2
FALSE	High	IsMasterProtein	ch06i_Q99808-2	Isoform 2 of Equilibrative nucleoside transporter 1 OS=Homo sapiens GN=SLC29A1	0	7.943	2.80374	1	6	1	1	535	58.9	8.15	High	Not Found	High	Peak Found	Not Found	Peak Found		0.241		0.328	0.2845	161.2		150.6	38.8		49.4	0.101	0	5.7	1	105	1
FALSE	High	IsMasterProtein	ch10u_O95858	Tetraspanin-15 OS=Homo sapiens GN=TSPAN15 PE=1 SV=1	0	11.235	4.08163	1	6	1	1	294	33.1	5.48	Not Found	High	Not Found	Not Found	High	Not Found			0.284		0.284		155.7			44.3		0.389	0	7.03	1	157	1
FALSE	High	IsMasterProtein	ch10u_P52895	Aldo-keto reductase family 1 member C2 OS=Homo sapiens GN=AKR1C2 PE=1 SV=3	0	30.165	21.6718	6	41	3	1	323	36.7	7.49	High	High	High	Peak Found	High	High		0.27	0.28	0.294	0.281333	157.5	156.3	154.6	42.5	43.7	45.4	1.404	0	44.73	6	404	4
FALSE	High	IsMasterProtein	ch12i_P05091	Aldehyde dehydrogenase, mitochondrial OS=Homo sapiens GN=ALDH2 PE=1 SV=2	0	23.044	6.5764	4	84	1	1	517	56.3	7.05	High	High	Not Found	Peak Found	Peak Found	Not Found		0.256	0.306		0.281	159.3	153.1		40.7	46.9		0.931	0	72.7	4	240	4
FALSE	High	IsMasterProtein	ch07u_P62879	Guanine nucleotide-binding protein G(I)/G(S)/G(T) subunit beta-2 OS=Homo sapiens GN=GNB2 PE=1 SV=3	0	15.791	11.4706	3	10	3	1	340	37.3	6	High	High	High	Peak Found	Peak Found	Peak Found	Acetyl [N-Term]	0.171	0.389	0.268	0.276	170.8	144	157.7	29.2	56	42.3	0.778	0	2.6	1	113	3
FALSE	High	IsMasterProtein	P10155	60 kDa SS-A/Ro ribonucleoprotein OS=Homo sapiens GN=TROVE2 PE=1 SV=2	0	18.823	6.50558	3	22	3	1	538	60.6	8.03	High	High	High	Peak Found	High	High		0.251	0.269	0.292	0.270667	159.8	157.6	154.8	40.2	42.4	45.2	0.403	0	25.09	3	273	3
FALSE	High	IsMasterProtein	ch19i_P10301	Ras-related protein R-Ras OS=Homo sapiens GN=RRAS PE=1 SV=1	0	22.598	26.6055	4	26	4	1	218	23.5	6.93	High	High	High	High	High	High		0.271	0.266	0.27	0.269	157.4	158	157.5	42.6	42	42.5	1.154	0	31.31	4	279	4
FALSE	High	IsMasterProtein	ch22u_P62318	Small nuclear ribonucleoprotein Sm D3 OS=Homo sapiens GN=SNRPD3 PE=1 SV=1	0	10.356	7.93651	1	10	1	1	126	13.9	10.32	High	Peak Found	High	High	High	High		0.263	0.267	0.277	0.269	158.3	157.9	156.7	41.7	42.1	43.3	0.668	0	11.17	1	118	1
FALSE	High	IsMasterProtein	A8K3S1	Glucosamine-6-phosphate isomerase OS=Homo sapiens PE=2 SV=1	0	22.281	16.955	4	40	2	1	289	32.7	6.92	High	High	High	High	High	High		0.258	0.252	0.297	0.269	159	159.7	154.2	41	40.3	45.8	1.154	2	27.82	4	400	4
FALSE	High	IsMasterProtein	ch16u_P04075	Fructose-bisphosphate aldolase A OS=Homo sapiens GN=ALDOA PE=1 SV=2	0	343.787	54.6703	16	307	15	1	364	39.4	8.09	High	High	High	High	High	High		0.272	0.267	0.267	0.268667	157.3	157.8	157.9	42.7	42.2	42.1	80.855	2	423.16	14	6568	16
FALSE	High	IsMasterProtein	ch20i_Q15691	Microtubule-associated protein RP/EB family member 1 OS=Homo sapiens GN=MAPRE1 PE=1 SV=3	0.001	2.9	6.71642	1	6	1	1	268	30	5.14	High	High	High	Not Found	Peak Found	Peak Found			0.277	0.259	0.268		156.6	158.8		43.4	41.2	0.136	0	0	1	15	1
FALSE	High	IsMasterProtein	ch08i_Q15369	Transcription elongation factor B polypeptide 1 OS=Homo sapiens GN=TCEB1 PE=1 SV=1	0.001	2.886	11.6071	1	4	1	1	112	12.5	4.78	High	High	Not Found	Peak Found	Peak Found	Not Found		0.229	0.306		0.2675	162.8	153.1		37.2	46.9		0.334	0	0	1	30	1
FALSE	High	IsMasterProtein	P31947	14-3-3 protein sigma OS=Homo sapiens GN=SFN PE=1 SV=1	0	20.922	12.9032	3	62	1	1	248	27.8	4.74	High	High	High	Peak Found	Peak Found	Peak Found		0.269	0.262	0.264	0.265	157.6	158.5	158.3	42.4	41.5	41.7	1.154	0	45.67	3	332	3
FALSE	Medium	IsMasterProtein	ch12u_Q9UL25	Ras-related protein Rab-21 OS=Homo sapiens GN=RAB21 PE=1 SV=3	0.015	1.143	4.44444	1	2	1	1	225	24.3	7.94	High	Not Found	Not Found	Peak Found	Not Found	Not Found		0.265			0.265	158.2			41.8			0.166	0	0	1	0	1
FALSE	High	IsMasterProtein	ch12i_P04406	Glyceraldehyde-3-phosphate dehydrogenase OS=Homo sapiens GN=GAPDH PE=1 SV=3	0	149.46	38.5075	11	199	11	1	335	36	8.46	High	High	High	High	High	High		0.267	0.259	0.264	0.263333	157.8	158.9	158.3	42.2	41.1	41.7	12.895	0	237.36	11	2950	11
FALSE	High	IsMasterProtein	O15143	Actin-related protein 2/3 complex subunit 1B OS=Homo sapiens GN=ARPC1B PE=1 SV=3	0	75.093	28.4946	8	83	8	1	372	40.9	8.35	High	High	High	High	Peak Found	High		0.227	0.269	0.292	0.262667	163	157.6	154.8	37	42.4	45.2	5.158	0	102.58	8	1134	8
FALSE	High	IsMasterProtein	A8K6Q8	cDNA FLJ75881, highly similar to Homo sapiens transferrin receptor (p90, CD71) (TFRC), mRNA OS=Homo sapiens PE=2 SV=1	0	23.745	10	6	35	6	1	760	84.8	6.61	High	High	High	High	High	High		0.295	0.244	0.248	0.262333	154.4	160.8	160.2	45.6	39.2	39.8	0.435	0	32.09	6	246	6
FALSE	High	IsMasterProtein	P61077-2	Isoform 2 of Ubiquitin-conjugating enzyme E2 D3 OS=Homo sapiens GN=UBE2D3	0.002	2.686	6.75676	1	2	1	1	148	16.8	7.3	Not Found	High	Not Found	Not Found	Peak Found	Not Found			0.262		0.262		158.5			41.5		0.585	0	0	1	42	1
FALSE	High	IsMasterProtein	ch05u_Q9NZL9	Methionine adenosyltransferase 2 subunit beta OS=Homo sapiens GN=MAT2B PE=1 SV=1	0	15.769	11.0778	2	8	2	1	334	37.5	7.36	High	High	High	Not Found	Peak Found	Not Found			0.261		0.261		158.6			41.4		0.245	0	11.95	2	106	2
FALSE	High	IsMasterProtein	P62854	40S ribosomal protein S26 OS=Homo sapiens GN=RPS26 PE=1 SV=3	0.001	4.02	7.82609	1	8	1	1	115	13	11	High	High	High	Peak Found	High	Peak Found		0.234	0.279	0.269	0.260667	162.1	156.4	157.7	37.9	43.6	42.3	1.154	0	3.89	1	67	1
FALSE	High	IsMasterProtein	P12814-3	Isoform 3 of Alpha-actinin-1 OS=Homo sapiens GN=ACTN1	0	336.415	39.6061	34	632	16	1	914	105.5	5.41	High	High	High	High	High	High		0.164	0.24	0.37	0.258	171.8	161.3	145.9	28.2	38.7	54.1	8.641	0	742.69	33	7932	33
FALSE	High	IsMasterProtein	Q53FR4	Vacuolar protein sorting 35 variant (Fragment) OS=Homo sapiens PE=2 SV=1	0	5.004	1.75879	1	2	1	1	796	91.6	5.49	Not Found	Not Found	High	Not Found	Not Found	Peak Found				0.254	0.254			159.5			40.5	0.047	0	2.13	1	30	1
FALSE	High	IsMasterProtein	B4E1U9	cDNA FLJ54776, highly similar to Cell division control protein 42 homolog OS=Homo sapiens PE=2 SV=1	0	9.679	4.23729	1	14	1	1	236	26.5	7.59	High	High	High	High	High	High		0.251	0.247	0.263	0.253667	159.9	160.4	158.4	40.1	39.6	41.6	0.52	0	10.42	1	171	1
FALSE	High	IsMasterProtein	ch11i_E9PR17	CD59 glycoprotein OS=Homo sapiens GN=CD59 PE=1 SV=1	0	27.525	19.2308	4	43	4	1	130	14.5	7.77	High	High	High	Peak Found	High	High		0.248	0.257	0.254	0.253	160.2	159.1	159.5	39.8	40.9	40.5	20.544	0	23.61	4	179	4
FALSE	High	IsMasterProtein	Q15758	Neutral amino acid transporter B(0) OS=Homo sapiens GN=SLC1A5 PE=1 SV=2	0	20.638	10.3512	4	26	1	1	541	56.6	5.48	High	High	High	Peak Found	Peak Found	Peak Found		0.181	0.28	0.297	0.252667	169.4	156.2	154.2	30.6	43.8	45.8	0.52	0	28.19	4	320	4
FALSE	High	IsMasterProtein	Q5JWF2	Guanine nucleotide-binding protein G(s) subunit alpha isoforms XLas OS=Homo sapiens GN=GNAS PE=1 SV=2	0	17.655	4.72517	4	26	3	1	1037	111	5.03	High	High	High	Peak Found	Peak Found	Not Found		0.246	0.257	0.244	0.249	160.6	159.1	160.8	39.4	40.9	39.2	0.365	1	19.76	4	311	4
FALSE	High	IsMasterProtein	V9HWE0	Annexin OS=Homo sapiens GN=HEL-S-7 PE=2 SV=1	0	34.228	16.875	8	62	8	1	320	35.9	5.05	High	High	High	High	High	High		0.216	0.26	0.267	0.247667	164.5	158.7	157.9	35.5	41.3	42.1	1.649	0	42.62	8	401	8
FALSE	High	IsMasterProtein	ch01i_Q99598	Translin-associated protein X OS=Homo sapiens GN=TSNAX PE=1 SV=1	0	16.361	11.0345	4	27	4	1	290	33.1	6.55	High	High	High	Peak Found	Peak Found	High		0.239	0.238	0.265	0.247333	161.4	161.5	158.1	38.6	38.5	41.9	0.778	0	27.59	4	235	4
FALSE	High	IsMasterProtein	B2RBR9	cDNA, FLJ95650, highly similar to Homo sapiens karyopherin (importin) beta 1 (KPNB1), mRNA OS=Homo sapiens PE=2 SV=1	0	79.698	11.6438	7	79	7	1	876	97.1	4.78	High	High	High	High	High	High	Acetyl [N-Term]	0.234	0.261	0.244	0.246333	162	158.5	160.8	38	41.5	39.2	1.081	0	103.72	7	1266	7
FALSE	High	IsMasterProtein	ch12u_B7Z6Z4	Myosin light polypeptide 6 OS=Homo sapiens GN=MYL6 PE=1 SV=1	0	6.643	11.7647	2	7	2	1	238	26.7	5.08	High	High	High	Peak Found	Peak Found	Peak Found		0.247	0.247	0.245	0.246333	160.4	160.4	160.6	39.6	39.6	39.4	0.311	0	2.03	2	67	2
FALSE	High	IsMasterProtein	B4E1J8	cDNA FLJ56285, highly similar to ADP-ribosylation factor-like protein 8B OS=Homo sapiens PE=2 SV=1	0.001	2.807	3.78151	1	6	1	1	238	27.2	9.66	High	High	High	Peak Found	Peak Found	Peak Found		0.257	0.241	0.241	0.246333	159.1	161.2	161.1	40.9	38.8	38.9	0.194	0	0	1	60	1
FALSE	High	IsMasterProtein	B4DMN1	cDNA FLJ61136, highly similar to Ras-related protein Rab-11A OS=Homo sapiens PE=2 SV=1	0	10.879	13.0268	3	12	3	1	261	28.8	8.38	Peak Found	Peak Found	Peak Found	High	High	High		0.236	0.244	0.252	0.244	161.8	160.7	159.8	38.2	39.3	40.2	0.501	0	15.03	3	114	3
FALSE	High	IsMasterProtein	Q9H8M9	Protein eva-1 homolog A OS=Homo sapiens GN=EVA1A PE=1 SV=1	0.002	2.203	7.23684	1	6	1	1	152	17.5	6.93	High	High	High	Peak Found	Peak Found	Peak Found		0.245	0.232	0.254	0.243667	160.7	162.3	159.5	39.3	37.7	40.5	0.468	0	0	1	39	1
FALSE	High	IsMasterProtein	chXi_P22314	Ubiquitin-like modifier-activating enzyme 1 OS=Homo sapiens GN=UBA1 PE=1 SV=3	0	21.108	5.7656	4	29	4	1	1058	117.8	5.76	High	High	High	Peak Found	Peak Found	Peak Found		0.294	0.329	0.102	0.241667	154.6	150.5	181.5	45.4	49.5	18.5	0.166	0	36.17	4	399	4
FALSE	High	IsMasterProtein	B4DLV7	Rab GDP dissociation inhibitor OS=Homo sapiens PE=2 SV=1	0	11.313	8.90869	3	15	3	1	449	51.1	8.18	High	High	High	Peak Found	Peak Found	Not Found		0.394	0.309	0.01	0.237667	143.5	152.7	200	56.5	47.3		0.259	0	10.54	3	138	3
FALSE	High	IsMasterProtein	ch01u_P52209	6-phosphogluconate dehydrogenase, decarboxylating OS=Homo sapiens GN=PGD PE=1 SV=3	0	79.894	23.3954	10	84	10	1	483	53.1	7.23	High	High	High	High	High	High		0.245	0.234	0.231	0.236667	160.7	162.1	162.4	39.3	37.9	37.6	2.687	0	81.96	10	1122	10
FALSE	High	IsMasterProtein	A0A140VJT8	Testicular tissue protein Li 164 OS=Homo sapiens PE=2 SV=1	0	29.652	20.8243	7	30	7	1	461	49.9	4.82	High	High	High	Peak Found	Peak Found	Peak Found		0.269	0.23	0.211	0.236667	157.6	162.6	165.1	42.4	37.4	34.9	0.711	0	33.06	7	461	7
FALSE	High	IsMasterProtein	P11233	Ras-related protein Ral-A OS=Homo sapiens GN=RALA PE=1 SV=1	0	10.815	14.0777	2	12	2	1	206	23.6	7.11	High	High	High	High	High	High		0.26	0.23	0.216	0.235333	158.7	162.7	164.5	41.3	37.3	35.5	0.52	0	11.68	2	151	2
FALSE	High	IsMasterProtein	D3DWY7	von Hippel-Lindau binding protein 1, isoform CRA_b OS=Homo sapiens GN=VBP1 PE=4 SV=1	0	4.305	4.29185	1	4	1	1	233	26.5	9.01	High	High	Not Found	Peak Found	Peak Found	Not Found		0.248	0.222		0.235	160.2	163.7		39.8	36.3		0.155	0	4.18	1	59	1
FALSE	High	IsMasterProtein	P06733	Alpha-enolase OS=Homo sapiens GN=ENO1 PE=1 SV=2	0	267.642	43.5484	16	212	15	1	434	47.1	7.39	High	High	High	High	High	High		0.23	0.238	0.236	0.234667	162.6	161.5	161.8	37.4	38.5	38.2	19.434	1	281.73	16	3499	15
FALSE	High	IsMasterProtein	A8K7F6	cDNA FLJ78244, highly similar to Homo sapiens eukaryotic translation initiation factor 4A, isoform 1 (EIF4A1), mRNA OS=Homo sapiens PE=2 SV=1	0	22.673	12.8079	4	20	4	1	406	46.1	5.48	High	High	High	Peak Found	Peak Found	Peak Found		0.229	0.237	0.237	0.234333	162.8	161.7	161.6	37.2	38.3	38.4	0.468	0	28.13	4	403	4
FALSE	High	IsMasterProtein	Q59EJ3	Heat shock 70kDa protein 1A variant (Fragment) OS=Homo sapiens PE=2 SV=1	0	16.082	4.09027	2	42	1	1	709	77.4	6.3	Not Found	High	High	Not Found	Peak Found	Peak Found			0.202	0.265	0.2335		166.5	158.1		33.5	41.9	0.166	0	36.07	2	582	2
FALSE	High	IsMasterProtein	P18085	ADP-ribosylation factor 4 OS=Homo sapiens GN=ARF4 PE=1 SV=3	0	8.919	11.6667	2	7	1	1	180	20.5	7.14	Not Found	High	Not Found	Not Found	High	Not Found			0.233		0.233		162.3			37.7		0.701	0	4.06	2	88	2
FALSE	High	IsMasterProtein	ch03i_C9JIF9	Acylamino-acid-releasing enzyme OS=Homo sapiens GN=APEH PE=1 SV=1	0	11.719	6.3772	4	12	4	1	737	81.6	5.54	High	High	High	Not Found	Peak Found	Peak Found			0.446	0.017	0.2315		138.3	196.7		61.7	3.3	0.283	0	11.06	4	47	4
FALSE	High	IsMasterProtein	P23229	Integrin alpha-6 OS=Homo sapiens GN=ITGA6 PE=1 SV=5	0	4.673	1.9469	2	6	2	1	1130	126.5	6.61	Peak Found	Not Found	High	High	Not Found	High		0.275		0.188	0.2315	156.9		168.4	43.1		31.6	0.07	0	2.3	2	25	2
FALSE	High	IsMasterProtein	B4DUP2	cDNA FLJ56155, highly similar to UTP--glucose-1-phosphate uridylyltransferase 2 (EC 2.7.7.9) OS=Homo sapiens PE=2 SV=1	0	74.67	24.1779	11	84	11	1	517	57.8	8.13	High	High	High	High	High	High		0.229	0.235	0.23	0.231333	162.7	162	162.6	37.3	38	37.4	2.398	0	88.38	11	786	11
FALSE	High	IsMasterProtein	ch06u_A0A0G2JM12	Casein kinase II subunit beta OS=Homo sapiens GN=CSNK2B PE=1 SV=1	0	4.739	3.61842	1	6	1	1	304	34.7	4.59	High	High	High	Peak Found	Not Found	Peak Found		0.282		0.18	0.231	156		169.5	44		30.5	0.212	0	6.99	1	70	1
FALSE	High	IsMasterProtein	ch05i_Q13283	Ras GTPase-activating protein-binding protein 1 OS=Homo sapiens GN=G3BP1 PE=1 SV=1	0	4.34	4.93562	1	5	1	1	466	52.1	5.52	High	High	High	Peak Found	Peak Found	Peak Found		0.314	0.2	0.178	0.230667	152.2	166.7	169.8	47.8	33.3	30.2	0.212	0	0	1	0	1
FALSE	High	IsMasterProtein	ch09i_Q6ZRP7	Sulfhydryl oxidase 2 OS=Homo sapiens GN=QSOX2 PE=1 SV=3	0	25.423	8.30946	4	20	4	1	698	77.5	7.72	High	High	High	Peak Found	Peak Found	Peak Found		0.227	0.226	0.236	0.229667	163	163.1	161.8	37	36.9	38.2	0.222	0	26.57	4	384	4
FALSE	High	IsMasterProtein	ch12i_B5MDF5	GTP-binding nuclear protein Ran OS=Homo sapiens GN=RAN PE=1 SV=1	0	32.429	26.6094	7	43	7	1	233	26.2	7.01	High	High	High	Peak Found	Peak Found	High	Acetyl [N-Term]	0.199	0.244	0.239	0.227333	166.8	160.8	161.5	33.2	39.2	38.5	5.579	0	36.24	6	282	7
FALSE	High	IsMasterProtein	ch08u_P63104	14-3-3 protein zeta/delta OS=Homo sapiens GN=YWHAZ PE=1 SV=1	0	154.466	39.5918	11	278	8	1	245	27.7	4.79	High	High	High	High	High	High		0.229	0.225	0.224	0.226	162.8	163.3	163.5	37.2	36.7	36.5	25.367	1	247.18	11	3930	11
FALSE	High	IsMasterProtein	ch03i_Q15008-4	Isoform 4 of 26S proteasome non-ATPase regulatory subunit 6 OS=Homo sapiens GN=PSMD6	0	32.205	12.6697	5	39	5	1	442	51.9	6.74	High	High	High	Peak Found	Peak Found	Peak Found		0.207	0.23	0.229	0.222	165.7	162.6	162.8	34.3	37.4	37.2	0.607	0	51.8	5	360	5
FALSE	High	IsMasterProtein	ch07u_P60709	Actin, cytoplasmic 1 OS=Homo sapiens GN=ACTB PE=1 SV=1	0	347.751	62.1333	19	540	1	1	375	41.7	5.48	High	High	High	Peak Found	Peak Found	Peak Found	Acetyl [N-Term]	0.219	0.222	0.223	0.221333	164.1	163.6	163.5	35.9	36.4	36.5	271.134	20	630.48	18	6655	19
FALSE	High	IsMasterProtein	ch16u_Q01650	Large neutral amino acids transporter small subunit 1 OS=Homo sapiens GN=SLC7A5 PE=1 SV=2	0	18.473	3.5503	1	28	1	1	507	55	7.72	High	High	High	High	High	High		0.224	0.22	0.218	0.220667	163.4	163.9	164.2	36.6	36.1	35.8	0.259	0	38.39	1	622	1
FALSE	High	IsMasterProtein	ch01u_B1AKJ5	Nardilysin OS=Homo sapiens GN=NRDC PE=1 SV=1	0	19.468	4.51189	5	26	5	1	1219	139.3	5	High	High	High	High	High	High		0.253		0.187	0.22	159.6		168.4	40.4		31.6	0.28	0	23.86	5	180	5
FALSE	High	IsMasterProtein	chXi_Q60FE5	Filamin A OS=Homo sapiens GN=FLNA PE=1 SV=1	0	583.302	31.0687	56	512	54	1	2620	278.1	6.06	High	High	High	High	High	High		0.219	0.225	0.213	0.219	164.1	163.3	164.9	35.9	36.7	35.1	3.571	0	709.49	55	7678	56
FALSE	High	IsMasterProtein	P62277	40S ribosomal protein S13 OS=Homo sapiens GN=RPS13 PE=1 SV=2	0	10.375	19.8675	3	18	3	1	151	17.2	10.54	High	High	High	High	High	High		0.226	0.209	0.219	0.218	163.2	165.5	164.1	36.8	34.5	35.9	1.31	0	10.02	3	73	3
FALSE	High	IsMasterProtein	Q53FR9	COMM domain containing 9 variant (Fragment) OS=Homo sapiens GN=COMMD9 PE=2 SV=1	0.002	1.866	6.06061	1	3	1	1	198	21.8	5.88	Not Found	High	High	Not Found	Peak Found	Not Found			0.218		0.218		164.2			35.8		0.212	0	0	1	0	1
FALSE	High	IsMasterProtein	ch01i_Q06830	Peroxiredoxin-1 OS=Homo sapiens GN=PRDX1 PE=1 SV=1	0	57.718	41.7085	10	87	8	1	199	22.1	8.13	High	High	High	High	High	High		0.215	0.203	0.235	0.217667	164.6	166.2	162	35.4	33.8	38	12.895	2	77.06	10	682	10
FALSE	High	IsMasterProtein	ch02i_P40925-3	Isoform 3 of Malate dehydrogenase, cytoplasmic OS=Homo sapiens GN=MDH1	0	58.811	22.4432	5	50	5	1	352	38.6	7.71	High	High	High	High	High	High		0.222	0.216	0.209	0.215667	163.7	164.5	165.5	36.3	35.5	34.5	1.089	0	68.85	5	1144	5
FALSE	High	IsMasterProtein	Q9ULV4-3	Isoform 3 of Coronin-1C OS=Homo sapiens GN=CORO1C	0	19.387	7.77989	3	18	3	1	527	58.9	7.75	High	High	High	Peak Found	Peak Found	Peak Found		0.281	0.182	0.182	0.215	156.1	169.2	169.2	43.9	30.8	30.8	0.359	0	21.01	3	255	3
FALSE	High	IsMasterProtein	A8K7T0	Kynureninase OS=Homo sapiens GN=KYNU PE=2 SV=1	0	129.743	28.3871	11	109	11	1	465	52.3	6.83	High	High	High	High	High	High		0.21	0.224	0.21	0.214667	165.3	163.4	165.3	34.7	36.6	34.7	4.736	0	147.51	11	1481	10
FALSE	High	IsMasterProtein	Q92598-4	Isoform 4 of Heat shock protein 105 kDa OS=Homo sapiens GN=HSPH1	0	40.242	12.2093	8	62	7	1	860	97.4	5.72	High	High	High	Peak Found	Peak Found	Peak Found		0.232	0.15	0.255	0.212333	162.3	173.9	159.4	37.7	26.1	40.6	0.498	0	71.72	8	794	7
FALSE	High	IsMasterProtein	P61160-2	Isoform 2 of Actin-related protein 2 OS=Homo sapiens GN=ACTR2	0	43.29	18.0451	7	51	7	1	399	45.3	7.2	High	High	High	High	High	High		0.212	0.199	0.219	0.21	165	166.8	164	35	33.2	36	1.848	0	55.68	7	648	7
FALSE	High	IsMasterProtein	B5BU24	14-3-3 protein beta/alpha OS=Homo sapiens GN=YWHAB PE=2 SV=1	0	31.758	27.2358	7	90	4	1	246	28.1	4.83	High	High	High	Peak Found	High	High		0.219	0.226	0.185	0.21	164.1	163.1	168.8	35.9	36.9	31.2	3.437	0	58.24	6	460	7
FALSE	High	IsMasterProtein	ch15i_P33316	Deoxyuridine 5'-triphosphate nucleotidohydrolase, mitochondrial OS=Homo sapiens GN=DUT PE=1 SV=4	0.001	3.648	3.1746	1	6	1	1	252	26.5	9.36	High	High	High	Peak Found	Peak Found	Peak Found		0.222	0.189	0.218	0.209667	163.7	168.2	164.2	36.3	31.8	35.8	0.145	0	5.96	1	84	1
FALSE	High	IsMasterProtein	Q59FR8	Galectin (Fragment) OS=Homo sapiens PE=2 SV=1	0.002	2.673	4.26357	1	10	1	1	258	27.1	8.41	High	High	High	Peak Found	Peak Found	Peak Found		0.17	0.209	0.25	0.209667	171	165.4	159.9	29	34.6	40.1	0.212	0	2.01	1	18	1
FALSE	High	IsMasterProtein	A0A158RFU6	RAB7, member RAS oncogene family, isoform CRA_a OS=Homo sapiens GN=RAB7A PE=2 SV=1	0	21.658	21.256	4	26	4	1	207	23.5	6.7	High	High	High	High	High	Peak Found		0.204	0.211	0.212	0.209	166.1	165.2	165	33.9	34.8	35	1.254	0	27.02	4	237	4
FALSE	High	IsMasterProtein	A0A140VJM0	Testicular tissue protein Li 96 OS=Homo sapiens PE=2 SV=1	0	43.183	7.32636	6	70	6	1	1051	116.5	6.77	High	High	High	High	High	High		0.207	0.212	0.207	0.208667	165.7	165	165.8	34.3	35	34.2	0.734	0	57.87	6	522	6
FALSE	High	IsMasterProtein	Q99497	Protein deglycase DJ-1 OS=Homo sapiens GN=PARK7 PE=1 SV=2	0	9.764	16.4021	2	8	2	1	189	19.9	6.79	High	High	High	Not Found	Not Found	Peak Found				0.208	0.208			165.6			34.4	0.425	0	11.77	2	92	2
FALSE	High	IsMasterProtein	B2RDN9	cDNA, FLJ96699, highly similar to Homo sapiens thyroid autoantigen 70kDa (Ku antigen) (G22P1), mRNA OS=Homo sapiens PE=2 SV=1	0.001	3.802	2.29885	1	4	1	1	609	69.7	6.7	High	Not Found	High	Peak Found	Not Found	Peak Found		0.161		0.251	0.206	172.3		159.9	27.7		40.1	0.059	0	5.36	1	54	1
FALSE	High	IsMasterProtein	ch02u_O15144	Actin-related protein 2/3 complex subunit 2 OS=Homo sapiens GN=ARPC2 PE=1 SV=1	0	69.05	26.6667	9	88	9	1	300	34.3	7.36	High	High	High	High	High	High		0.183	0.228	0.204	0.205	169	162.8	166.2	31	37.2	33.8	3.062	0	88.64	9	755	9
FALSE	High	IsMasterProtein	ch17i_P07737	Profilin-1 OS=Homo sapiens GN=PFN1 PE=1 SV=2	0	21.864	22.1429	3	21	3	1	140	15	8.27	High	High	High	Peak Found	Peak Found	High		0.202	0.212	0.201	0.205	166.4	165.1	166.6	33.6	34.9	33.4	2.594	0	11.12	3	304	3
FALSE	High	IsMasterProtein	ch03i_F8WCF6	Actin-related protein 2/3 complex subunit 4 OS=Homo sapiens GN=ARPC4-TTLL3 PE=3 SV=1	0	32.746	29.2818	6	54	6	1	181	21	8.76	High	High	High	High	High	High	Acetyl [N-Term]	0.209	0.2	0.205	0.204667	165.4	166.6	166	34.6	33.4	34	5.105	0	42.31	5	488	6
FALSE	High	IsMasterProtein	A0A024R1V4	60S ribosomal protein L27 OS=Homo sapiens GN=RPL27 PE=3 SV=1	0.001	3.844	13.2353	2	8	2	1	136	15.8	10.56	High	High	High	Peak Found	Peak Found	Peak Found		0.218	0.193	0.201	0.204	164.2	167.7	166.5	35.8	32.3	33.5	1.154	0	3.45	2	59	2
FALSE	High	IsMasterProtein	P62258	14-3-3 protein epsilon OS=Homo sapiens GN=YWHAE PE=1 SV=1	0	160.171	50.5882	14	334	12	1	255	29.2	4.74	High	High	High	High	High	High	Acetyl [N-Term]	0.205	0.207	0.199	0.203667	166	165.7	166.8	34	34.3	33.2	76.426	3	321.16	12	4444	14
FALSE	High	IsMasterProtein	B5BUB1	RuvB-like helicase (Fragment) OS=Homo sapiens GN=RUVBL1 PE=2 SV=1	0	54.413	22.1491	7	49	7	1	456	50.2	6.42	High	High	High	High	High	High		0.174	0.221	0.216	0.203667	170.3	163.7	164.5	29.7	36.3	35.5	1.61	0	61.92	7	480	7
FALSE	High	IsMasterProtein	A8K486	Peptidyl-prolyl cis-trans isomerase OS=Homo sapiens PE=2 SV=1	0	8.948	23.6364	3	6	3	1	165	18	6.9	High	Not Found	High	Peak Found	Not Found	Not Found		0.203			0.203	166.2			33.8			0.585	0	2.18	3	52	3
FALSE	High	IsMasterProtein	Q59GX2	Solute carrier family 2 (Facilitated glucose transporter), member 1 variant (Fragment) OS=Homo sapiens PE=2 SV=1	0	4.693	2.70793	2	14	2	1	517	57	9.47	High	High	High	Peak Found	Peak Found	Peak Found		0.202	0.2	0.207	0.203	166.4	166.7	165.7	33.6	33.3	34.3	0.292	0	7.72	2	68	2
FALSE	High	IsMasterProtein	ch11u_H7C3X5	Syntaxin-5 (Fragment) OS=Homo sapiens GN=STX5 PE=1 SV=1	0.001	3.328	8.22785	1	8	1	1	158	17.6	7.06	Not Found	High	High	Not Found	Peak Found	Peak Found			0.198	0.204	0.201		167	166.2		33	33.8	0.585	0	0	1	0	1
FALSE	High	IsMasterProtein	chXi_Q7Z6Z7	E3 ubiquitin-protein ligase HUWE1 OS=Homo sapiens GN=HUWE1 PE=1 SV=3	0	32.152	2.40055	6	16	6	1	4374	481.6	5.22	High	High	High	Peak Found	Not Found	Peak Found		0.319	0.01	0.273	0.200667	151.6	200	157.1	48.4		42.9	0.064	0	13.95	6	258	6
FALSE	High	IsMasterProtein	ch09u_P04083	Annexin A1 OS=Homo sapiens GN=ANXA1 PE=1 SV=2	0	181.156	47.3988	17	190	17	1	346	38.7	7.02	High	High	High	High	High	High		0.226	0.17	0.205	0.200333	163.1	170.9	166	36.9	29.1	34	25.827	0	243.18	17	3244	17
FALSE	High	IsMasterProtein	ch09i_P55072	Transitional endoplasmic reticulum ATPase OS=Homo sapiens GN=VCP PE=1 SV=4	0	473.243	47.6427	33	484	33	1	806	89.3	5.26	High	High	High	High	High	High	Acetyl [N-Term]	0.203	0.197	0.197	0.199	166.2	167.1	167.1	33.8	32.9	32.9	27.73	0	668.95	32	8506	33
FALSE	High	IsMasterProtein	ch05i_Q562R1	Beta-actin-like protein 2 OS=Homo sapiens GN=ACTBL2 PE=1 SV=2	0	79.968	20.4787	9	135	4	1	376	42	5.59	High	High	High	High	High	High		0.2	0.207	0.183	0.196667	166.6	165.7	169.1	33.4	34.3	30.9	6.499	0	103.94	9	1755	8
FALSE	High	IsMasterProtein	ch02u_B7Z4C8	60S ribosomal protein L31 OS=Homo sapiens GN=RPL31 PE=1 SV=1	0	5.52	6.92308	1	4	1	1	130	15.1	10.37	Peak Found	High	Not Found	High	Peak Found	Not Found		0.201	0.189		0.195	166.5	168.2		33.5	31.8		0.778	0	1.72	1	34	1
FALSE	High	IsMasterProtein	Q14014	PR310 c-K-ras protein (Fragment) OS=Homo sapiens PE=2 SV=1	0.001	2.821	8	1	4	1	1	150	16.9	5.21	High	Not Found	High	Peak Found	Not Found	Peak Found		0.194			0.194	167.5			32.5			0.292	0	3.87	1	31	1
FALSE	High	IsMasterProtein	ch06i_O00299	Chloride intracellular channel protein 1 OS=Homo sapiens GN=CLIC1 PE=1 SV=4	0	23.259	21.1618	4	30	4	1	241	26.9	5.17	High	High	High	High	High	High	Acetyl [N-Term]	0.187	0.204	0.189	0.193333	168.4	166.1	168.3	31.6	33.9	31.7	1.254	0	19.57	3	307	4
FALSE	High	IsMasterProtein	ch20u_Q13404	Ubiquitin-conjugating enzyme E2 variant 1 OS=Homo sapiens GN=UBE2V1 PE=1 SV=2	0	6.412	14.966	2	7	2	1	147	16.5	7.93	Not Found	High	High	Not Found	Peak Found	Peak Found	Acetyl [N-Term]		0.155	0.228	0.1915		173.2	162.8		26.8	37.2	0.468	0	1.66	1	49	2
FALSE	High	IsMasterProtein	Q5VXV3	SET OS=Homo sapiens GN=SET PE=2 SV=1	0	52.554	25.5172	8	57	8	1	290	33.5	4.32	High	High	High	High	High	High		0.188	0.195	0.191	0.191333	168.3	167.4	167.9	31.7	32.6	32.1	11.115	0	64.27	8	461	8
FALSE	High	IsMasterProtein	ch15u_P14618	Pyruvate kinase PKM OS=Homo sapiens GN=PKM PE=1 SV=4	0	118.018	34.4633	15	109	15	1	531	57.9	7.84	High	High	High	High	High	High		0.199	0.19	0.179	0.189333	166.7	168	169.6	33.3	32	30.4	2.932	0	133	15	1334	15
FALSE	High	IsMasterProtein	Q9BQA1	Methylosome protein 50 OS=Homo sapiens GN=WDR77 PE=1 SV=1	0.002	1.886	2.04678	1	6	1	1	342	36.7	5.17	High	High	High	Peak Found	Not Found	Peak Found		0.194		0.183	0.1885	167.6		169.1	32.4		30.9	0.179	0	0	1	40	1
FALSE	High	IsMasterProtein	P23528	Cofilin-1 OS=Homo sapiens GN=CFL1 PE=1 SV=3	0	23.92	21.0843	4	27	4	1	166	18.5	8.09	High	High	High	Peak Found	Peak Found	Peak Found	Acetyl [N-Term]	0.188	0.187	0.189	0.188	168.3	168.5	168.2	31.7	31.5	31.8	2.162	0	9.46	3	417	4
FALSE	High	IsMasterProtein	ch11u_P16070	CD44 antigen OS=Homo sapiens GN=CD44 PE=1 SV=3	0	46.086	6.33423	5	83	5	1	742	81.5	5.33	High	High	High	High	High	High		0.17	0.203	0.185	0.186	170.9	166.2	168.8	29.1	33.8	31.2	0.968	0	88.22	5	923	5
FALSE	High	IsMasterProtein	P63261	Actin, cytoplasmic 2 OS=Homo sapiens GN=ACTG1 PE=1 SV=1	0	367.789	62.1333	19	548	1	1	375	41.8	5.48	High	High	High	Peak Found	Peak Found	Peak Found	Acetyl [N-Term]	0.198	0.181	0.178	0.185667	166.9	169.4	169.8	33.1	30.6	30.2	405.159	0	630.48	18	7068	19
FALSE	High	IsMasterProtein	ch12i_P60174	Triosephosphate isomerase OS=Homo sapiens GN=TPI1 PE=1 SV=3	0	145.971	52.7972	14	166	14	1	286	30.8	5.92	High	High	High	High	High	High		0.189	0.183	0.181	0.184333	168.3	169	169.4	31.7	31	30.6	28.764	0	183.79	14	2274	14
FALSE	High	IsMasterProtein	O43707	Alpha-actinin-4 OS=Homo sapiens GN=ACTN4 PE=1 SV=2	0	820.179	66.191	58	1286	39	1	911	104.8	5.44	High	High	High	High	High	High		0.184	0.185	0.183	0.184	168.9	168.7	169	31.1	31.3	31	110.588	19	1754.19	57	19022	58
FALSE	High	IsMasterProtein	ch09i_P68371	Tubulin beta-4B chain OS=Homo sapiens GN=TUBB4B PE=1 SV=1	0	58.544	29.6629	9	43	1	1	445	49.8	4.89	Not Found	High	High	Not Found	Peak Found	Peak Found			0.179	0.189	0.184		169.6	168.3		30.4	31.7	2.008	0	59.63	9	575	9
FALSE	High	IsMasterProtein	ch07i_O60568	Procollagen-lysine,2-oxoglutarate 5-dioxygenase 3 OS=Homo sapiens GN=PLOD3 PE=1 SV=1	0	24.001	7.31707	4	16	4	1	738	84.7	6.05	High	High	High	Peak Found	Peak Found	Peak Found		0.129	0.283	0.138	0.183333	177.1	155.9	175.7	22.9	44.1	24.3	0.216	0	15.35	4	113	4
FALSE	High	IsMasterProtein	ch01i_Q09028	Histone-binding protein RBBP4 OS=Homo sapiens GN=RBBP4 PE=1 SV=3	0	14.26	3.29412	1	4	1	1	425	47.6	4.89	High	High	Not Found	Peak Found	Peak Found	Not Found	Acetyl [N-Term]	0.149	0.216		0.1825	174	164.5		26	35.5		0.259	0			195	1
FALSE	High	IsMasterProtein	ch12u_Q9UBW8	COP9 signalosome complex subunit 7a OS=Homo sapiens GN=COPS7A PE=1 SV=1	0	18.675	20.7273	3	14	3	1	275	30.3	8.22	High	High	High	High	High	Peak Found		0.209	0.162	0.175	0.182	165.5	172.1	170.2	34.5	27.9	29.8	0.719	0	11.09	3	234	3
FALSE	High	IsMasterProtein	ch04i_P12429	Annexin A3 OS=Homo sapiens GN=ANXA3 PE=1 SV=3	0	30.368	24.1486	6	30	6	1	323	36.4	5.92	High	High	High	High	High	High		0.187	0.178	0.179	0.181333	168.5	169.9	169.6	31.5	30.1	30.4	0.957	0	28.76	6	522	6
FALSE	High	IsMasterProtein	ch02i_Q15631	Translin OS=Homo sapiens GN=TSN PE=1 SV=1	0	116.431	39.9123	11	140	11	1	228	26.2	6.44	High	High	High	High	High	High		0.177	0.179	0.181	0.179	169.9	169.6	169.3	30.1	30.4	30.7	82.768	0	162.21	11	1349	11
FALSE	High	IsMasterProtein	Q59FI9	Ribosomal protein L12 variant (Fragment) OS=Homo sapiens PE=2 SV=1	0.001	3.32	4.56853	1	4	1	1	197	21.5	10.1	High	Not Found	High	Peak Found	Not Found	Peak Found		0.175		0.182	0.1785	170.2		169.2	29.8		30.8	0.212	0	3.85	1	56	1
FALSE	High	IsMasterProtein	P15531-2	Isoform 2 of Nucleoside diphosphate kinase A OS=Homo sapiens GN=NME1	0	80.75	47.4576	9	190	1	1	177	19.6	5.58	High	High	High	High	High	Peak Found		0.176	0.175	0.183	0.178	170.1	170.2	169.1	29.9	29.8	30.9	99	0	134.29	9	1659	9
FALSE	High	IsMasterProtein	I1SRC5	UBE2L3/KRAS fusion protein OS=Homo sapiens PE=2 SV=1	0.001	2.821	4.05405	1	4	1	1	296	34	8.1	High	Not Found	High	Peak Found	Not Found	Peak Found				0.177	0.177			170			30	0.145	0	3.87	1	31	1
FALSE	High	IsMasterProtein	Q562M3	Actin-like protein (Fragment) OS=Homo sapiens GN=ACT PE=4 SV=1	0	97.301	57.2816	3	129	1	1	103	11.5	6.68	High	High	High	High	High	High		0.17	0.184	0.174	0.176	170.9	168.9	170.3	29.1	31.1	29.7	250.189	0	186.74	3	804	3
FALSE	High	IsMasterProtein	ch06i_X5D2R7	Proteasome subunit beta type OS=Homo sapiens GN=PSM8 PE=1 SV=1	0	47.855	18.4783	4	65	4	1	276	30.3	7.74	High	High	High	High	High	High		0.171	0.168	0.189	0.176	170.9	171.2	168.3	29.1	28.8	31.7	2.162	0	67.75	4	783	4
FALSE	High	IsMasterProtein	ch19u_Q9Y230	RuvB-like 2 OS=Homo sapiens GN=RUVBL2 PE=1 SV=3	0	17.283	14.6868	6	23	6	1	463	51.1	5.64	High	High	High	Peak Found	Peak Found	Peak Found		0.131	0.248	0.148	0.175667	176.9	160.3	174.2	23.1	39.7	25.8	0.61	0	22.79	6	186	6
FALSE	High	IsMasterProtein	B3KNB4	cDNA FLJ14168 fis, clone NT2RP2001440, highly similar to 14-3-3 protein gamma OS=Homo sapiens PE=2 SV=1	0	60.984	31.1741	8	135	5	1	247	28.2	4.89	High	High	High	High	High	High	Acetyl [N-Term]	0.173	0.175	0.177	0.175	170.5	170.2	170	29.5	29.8	30	6.743	0	111.39	7	1528	8
FALSE	High	IsMasterProtein	ch17i_Q13867	Bleomycin hydrolase OS=Homo sapiens GN=BLMH PE=1 SV=1	0	81.87	12.967	6	102	6	1	455	52.5	6.27	High	High	High	High	High	High		0.168	0.174	0.181	0.174333	171.3	170.3	169.4	28.7	29.7	30.6	2.433	0	131.24	6	1025	6
FALSE	High	IsMasterProtein	E5FF39	KRAS protein (Fragment) OS=Homo sapiens GN=KRAS PE=4 SV=1	0.003	1.644	33.3333	1	2	1	1	33	3.6	4.89	High	High	Not Found	Not Found	Peak Found	Not Found			0.173		0.173		170.5			29.5		2.162	0			0	1
FALSE	High	IsMasterProtein	V9HW88	Calreticulin, isoform CRA_b OS=Homo sapiens GN=HEL-S-99n PE=2 SV=1	0	67.676	19.4245	6	42	6	1	417	48.1	4.44	High	High	High	High	Peak Found	High		0.174	0.169	0.175	0.172667	170.3	171	170.2	29.7	29	29.8	1.649	0	63.77	6	738	6
FALSE	High	IsMasterProtein	A8K8N7	Phosphoribosylformylglycinamidine synthase (FGAR amidotransferase), isoform CRA_b OS=Homo sapiens GN=PFAS PE=2 SV=1	0	46.245	11.8834	10	44	10	1	1338	144.6	5.76	High	High	High	Peak Found	Peak Found	Peak Found		0.179	0.167	0.172	0.172667	169.6	171.4	170.6	30.4	28.6	29.4	0.396	0	60.63	10	509	9
FALSE	High	IsMasterProtein	ch02i_P31153	S-adenosylmethionine synthase isoform type-2 OS=Homo sapiens GN=MAT2A PE=1 SV=1	0	19.534	10.3797	5	15	5	1	395	43.6	6.48	High	High	High	Peak Found	Peak Found	Peak Found		0.17	0.182	0.163	0.171667	171	169.2	171.9	29	30.8	28.1	0.65	0	16.01	4	253	5
FALSE	High	IsMasterProtein	V9HWE9	Epididymis secretory protein Li 22 OS=Homo sapiens GN=HEL-S-22 PE=2 SV=1	0	24.014	27.1429	4	22	4	1	210	23.3	5.64	High	High	High	Peak Found	High	High		0.16	0.181	0.171	0.170667	172.4	169.4	170.9	27.6	30.6	29.1	1.61	0	8.03	3	274	4
FALSE	High	IsMasterProtein	P00558	Phosphoglycerate kinase 1 OS=Homo sapiens GN=PGK1 PE=1 SV=3	0	68.046	25.6595	7	38	7	1	417	44.6	8.1	High	High	High	Peak Found	Peak Found	High		0.192	0.141	0.178	0.170333	167.8	175.3	169.8	32.2	24.7	30.2	0.848	0	61.01	7	813	7
FALSE	High	IsMasterProtein	P00338	L-lactate dehydrogenase A chain OS=Homo sapiens GN=LDHA PE=1 SV=2	0	251.572	49.3976	18	413	16	1	332	36.7	8.27	High	High	High	High	High	High	Acetyl [N-Term]	0.164	0.168	0.177	0.169667	171.8	171.3	170	28.2	28.7	30	38.811	3	406.65	16	5078	18
FALSE	High	IsMasterProtein	ch19u_M0QYZ2	AP-2 complex subunit sigma OS=Homo sapiens GN=AP2S1 PE=1 SV=1	0.002	1.814	4.43038	1	2	1	1	158	18.9	7.81	Not Found	Not Found	High	Not Found	Not Found	Peak Found				0.169	0.169			171.1			28.9	0.334	0	0	1	24	1
FALSE	High	IsMasterProtein	B2RDE1	cDNA, FLJ96568, highly similar to Homo sapiens tropomyosin 3 (TPM3), mRNA OS=Homo sapiens PE=2 SV=1	0	81.422	47.5806	12	84	8	1	248	29	4.75	High	High	High	High	High	Peak Found	Acetyl [N-Term]	0.175	0.16	0.171	0.168667	170.2	172.5	170.8	29.8	27.5	29.2	6.305	4	89.4	10	841	12
FALSE	High	IsMasterProtein	ch19i_P62280	40S ribosomal protein S11 OS=Homo sapiens GN=RPS11 PE=1 SV=3	0	16.373	30.3797	5	20	5	1	158	18.4	10.3	High	High	High	Peak Found	Peak Found	Peak Found		0.164	0.162	0.18	0.168667	171.8	172.1	169.5	28.2	27.9	30.5	2.981	0	15.83	5	177	5
FALSE	High	IsMasterProtein	ch19u_P48556	26S proteasome non-ATPase regulatory subunit 8 OS=Homo sapiens GN=PSMD8 PE=1 SV=2	0	8.321	5.14286	2	14	2	1	350	39.6	9.7	High	High	High	High	High	High		0.197	0.133	0.175	0.168333	167	176.6	170.3	33	23.4	29.7	0.334	0	3.93	2	103	2
FALSE	High	IsMasterProtein	ch12i_P07195	L-lactate dehydrogenase B chain OS=Homo sapiens GN=LDHB PE=1 SV=2	0	207.289	39.521	16	513	14	1	334	36.6	6.05	High	High	High	High	High	High		0.167	0.165	0.171	0.167667	171.4	171.7	170.9	28.6	28.3	29.1	110.588	0	537.08	16	6683	16
FALSE	High	IsMasterProtein	ch17i_P07237	Protein disulfide-isomerase OS=Homo sapiens GN=P4HB PE=1 SV=3	0	182.377	39.7638	20	195	20	1	508	57.1	4.87	High	High	High	High	High	High		0.163	0.162	0.178	0.167667	172	172.1	169.8	28	27.9	30.2	7.414	0	208.51	20	2404	20
FALSE	High	IsMasterProtein	ch20i_P23526	Adenosylhomocysteinase OS=Homo sapiens GN=AHCY PE=1 SV=4	0	86.52	25.9259	11	109	11	1	432	47.7	6.34	High	High	High	High	High	High		0.165	0.172	0.164	0.167	171.6	170.7	171.8	28.4	29.3	28.2	5.31	0	125.32	11	1145	10
FALSE	High	IsMasterProtein	O60218	Aldo-keto reductase family 1 member B10 OS=Homo sapiens GN=AKR1B10 PE=1 SV=2	0	120.584	42.4051	11	97	11	1	316	36	7.84	High	High	High	High	High	High	Acetyl [N-Term]	0.169	0.157	0.174	0.166667	171	172.8	170.4	29	27.2	29.6	11.452	0	104.97	9	1130	11
FALSE	High	IsMasterProtein	ch20u_P48637	Glutathione synthetase OS=Homo sapiens GN=GSS PE=1 SV=1	0	57.464	19.1983	6	38	6	1	474	52.4	5.92	High	High	High	High	High	Peak Found	Acetyl [N-Term]	0.142	0.16	0.198	0.166667	175.1	172.4	166.9	24.9	27.6	33.1	1.009	0	39.81	5	750	6
FALSE	High	IsMasterProtein	ch12u_P55209	Nucleosome assembly protein 1-like 1 OS=Homo sapiens GN=NAP1L1 PE=1 SV=1	0	30.1	13.0435	5	34	3	1	391	45.3	4.46	High	High	High	Peak Found	High	Peak Found		0.176	0.178	0.145	0.166333	170	169.8	174.7	30	30.2	25.3	1.512	2	39.42	5	488	5
FALSE	High	IsMasterProtein	B2R983	cDNA, FLJ94267, highly similar to Homo sapiens glutathione S-transferase omega 1 (GSTO1), mRNA OS=Homo sapiens PE=2 SV=1	0	10.761	19.917	5	25	5	1	241	27.5	6.6	High	High	High	High	Peak Found	High		0.111	0.264	0.122	0.165667	180	158.3	178.2	20	41.7	21.8	1.371	0	10.73	5	116	5
FALSE	High	IsMasterProtein	Q14691	DNA replication complex GINS protein PSF1 OS=Homo sapiens GN=GINS1 PE=1 SV=1	0.002	2.223	7.14286	1	6	1	1	196	23	7.39	High	High	High	Not Found	Not Found	Peak Found				0.165	0.165			171.6			28.4	0.155	0	1.64	1	47	1
FALSE	High	IsMasterProtein	ch10i_P17174	Aspartate aminotransferase, cytoplasmic OS=Homo sapiens GN=GOT1 PE=1 SV=3	0	83.515	37.2881	10	59	10	1	413	46.2	7.01	High	High	High	High	High	Peak Found		0.155	0.17	0.168	0.164333	173.1	170.9	171.3	26.9	29.1	28.7	2.3	0	70.76	9	1128	10
FALSE	High	IsMasterProtein	B4DNC0	cDNA FLJ61141, highly similar to Ras-related protein Rab-34 OS=Homo sapiens PE=2 SV=1	0	20.819	10.5839	2	16	2	1	274	30.6	8.37	High	High	High	High	High	High		0.198	0.01	0.284	0.164	167	200	155.7	33		44.3	0.413	0	18.08	2	330	2
FALSE	High	IsMasterProtein	B2RAQ9	Proteasome subunit beta type OS=Homo sapiens PE=2 SV=1	0	37.058	9.02527	5	60	5	1	277	29.9	7.68	High	High	High	High	High	High		0.182	0.162	0.145	0.163	169.3	172.2	174.6	30.7	27.8	25.4	6.197	0	63.56	5	117	5
FALSE	High	IsMasterProtein	O00231-2	Isoform 2 of 26S proteasome non-ATPase regulatory subunit 11 OS=Homo sapiens GN=PSMD11	0	44.382	31.9149	10	48	10	1	423	47.5	6.48	High	High	High	Peak Found	Peak Found	Peak Found		0.176	0.155	0.153	0.161333	170	173.2	173.5	30	26.8	26.5	1.054	0	55.92	10	531	8
FALSE	High	IsMasterProtein	B2R6K4	cDNA, FLJ92996, highly similar to Homo sapiens guanine nucleotide binding protein (G protein), beta polypeptide 1 (GNB1), mRNA OS=Homo sapiens PE=2 SV=1	0	17.45	8.82353	2	8	2	1	340	37.3	6.18	High	High	High	Not Found	Peak Found	Peak Found	Acetyl [N-Term]		0.219	0.103	0.161		164.1	181.3		35.9	18.7	0.334	0	6.97	1	217	2
FALSE	High	IsMasterProtein	ch12i_O14910	Protein lin-7 homolog A OS=Homo sapiens GN=LIN7A PE=1 SV=2	0	6.483	6.86695	1	4	1	1	233	26	8.72	High	High	Not Found	Peak Found	Peak Found	Not Found		0.214	0.107		0.1605	164.7	180.6		35.3	19.4		0.179	0	6.01	1	80	1
FALSE	High	IsMasterProtein	ch11i_P84095	Rho-related GTP-binding protein RhoG OS=Homo sapiens GN=RHOG PE=1 SV=1	0	4.398	15.1832	2	6	2	1	191	21.3	8.12	Not Found	High	High	Not Found	Peak Found	High			0.152	0.168	0.16		173.5	171.3		26.5	28.7	0.468	0	2.21	2	36	2
FALSE	High	IsMasterProtein	ch05i_P63244	Receptor of activated protein C kinase 1 OS=Homo sapiens GN=RACK1 PE=1 SV=3	0	23.368	20.8202	5	24	5	1	317	35.1	7.69	High	High	High	Not Found	Peak Found	Peak Found		0.01	0.134	0.335	0.159667	200	176.3	149.9		23.7	50.1	0.874	0	16.93	5	299	5
FALSE	High	IsMasterProtein	P07900-2	Isoform 2 of Heat shock protein HSP 90-alpha OS=Homo sapiens GN=HSP90AA1	0	216.077	25.2927	23	224	13	1	854	98.1	5.16	High	High	High	High	High	High		0.17	0.152	0.156	0.159333	170.9	173.7	173	29.1	26.3	27	4.179	9	289.28	23	3423	23
FALSE	High	IsMasterProtein	A0A0A0MTS2	Glucose-6-phosphate isomerase (Fragment) OS=Homo sapiens GN=GPI PE=1 SV=1	0	95.863	25.3054	8	86	8	1	573	64.8	9.04	High	High	High	High	High	High		0.154	0.165	0.158	0.159	173.4	171.6	172.6	26.6	28.4	27.4	2.262	0	107.22	8	1035	8
FALSE	High	IsMasterProtein	B4DNB9	cDNA FLJ53069, highly similar to AP-2 complex subunit mu-1 OS=Homo sapiens PE=2 SV=1	0.003	1.645	2.3913	1	4	1	1	460	52.3	9.5	Not Found	High	High	Not Found	Peak Found	Not Found			0.308	0.01	0.159		152.9	200		47.1		0.077	0	0	1	0	1
FALSE	High	IsMasterProtein	V9HW22	Epididymis luminal protein 33 OS=Homo sapiens GN=HEL-S-72p PE=2 SV=1	0	114.949	26.161	13	135	12	1	646	70.9	5.52	High	High	High	Peak Found	Peak Found	High		0.149	0.167	0.16	0.158667	174.1	171.4	172.5	25.9	28.6	27.5	2.07	2	173.38	13	2007	13
FALSE	High	IsMasterProtein	ch07i_Q03135-2	Isoform 2 of Caveolin-1 OS=Homo sapiens GN=CAV1	0	6.136	10.2041	1	3	1	1	147	17	5.49	High	High	High	Peak Found	Peak Found	Peak Found	Acetyl [N-Term]	0.141	0.161	0.172	0.158	175.3	172.3	170.7	24.7	27.7	29.3	0.259	0			78	1
FALSE	High	IsMasterProtein	ch01i_Q9HB71	Calcyclin-binding protein OS=Homo sapiens GN=CACYBP PE=1 SV=2	0.002	2.63	13.5965	2	6	2	1	228	26.2	8.25	High	High	High	Not Found	Peak Found	Peak Found		0.01	0.22	0.244	0.158	200	164	160.7		36	39.3	0.389	0	1.67	2	30	2
FALSE	High	IsMasterProtein	ch17u_P28072	Proteasome subunit beta type-6 OS=Homo sapiens GN=PSMB6 PE=1 SV=4	0	14.724	8.78661	2	61	2	1	239	25.3	4.92	High	High	High	High	High	High		0.156	0.155	0.16	0.157	173	173.1	172.4	27	26.9	27.6	1.031	0	56.78	2	777	2
FALSE	High	IsMasterProtein	ch17u_J3QQX2	Rho GDP-dissociation inhibitor 1 OS=Homo sapiens GN=ARHGDIA PE=1 SV=1	0	25.101	13.617	3	18	3	1	235	25.8	7.44	High	High	High	High	High	High		0.147	0.173	0.15	0.156667	174.4	170.5	173.9	25.6	29.5	26.1	0.778	0	20.81	3	286	3
FALSE	High	IsMasterProtein	ch12u_Q96A72	Protein mago nashi homolog 2 OS=Homo sapiens GN=MAGOHB PE=1 SV=1	0	5.767	13.5135	2	8	2	1	148	17.3	6.39	High	High	High	Peak Found	Peak Found	Peak Found	Acetyl [N-Term]	0.163	0.142	0.165	0.156667	172	175.1	171.7	28	24.9	28.3	0.389	0	4.67	1	53	2
FALSE	Medium	IsMasterProtein	ch01u_P37802	Transgelin-2 OS=Homo sapiens GN=TAGLN2 PE=1 SV=3	0.013	1.221	5.52764	1	2	1	1	199	22.4	8.25	Not Found	High	High	Not Found	Peak Found	Peak Found	Acetyl [N-Term]		0.186	0.127	0.1565		168.7	177.4		31.3	22.6	0.179	0			15	1
FALSE	High	IsMasterProtein	O75369-8	Isoform 8 of Filamin-B OS=Homo sapiens GN=FLNB	0	483.354	33.308	65	394	63	1	2633	281.5	5.71	High	High	High	High	High	High		0.143	0.159	0.164	0.155333	174.9	172.5	171.8	25.1	27.5	28.2	2.822	2	543.67	64	5128	65
FALSE	High	IsMasterProtein	ch18i_Q969U7	Proteasome assembly chaperone 2 OS=Homo sapiens GN=PSMG2 PE=1 SV=1	0	7.636	4.54545	1	6	1	1	264	29.4	6.98	High	High	High	Peak Found	Peak Found	Peak Found		0.153	0.161	0.151	0.155	173.5	172.2	173.8	26.5	27.8	26.2	0.145	0	8.62	1	97	1
FALSE	High	IsMasterProtein	A0A0A1HAW1	H.sapiens ras-related Hrab2 protein OS=Homo sapiens PE=2 SV=1	0	27.311	24.0566	4	23	4	1	212	23.6	6.54	High	High	High	Peak Found	High	High	Acetyl [N-Term]	0.143	0.087	0.234	0.154667	175	184	162	25	16	38	1.929	0	13.09	3	184	4
FALSE	High	IsMasterProtein	ch17i_P49720	Proteasome subunit beta type-3 OS=Homo sapiens GN=PSMB3 PE=1 SV=2	0	67.485	29.7561	8	106	8	1	205	22.9	6.55	High	High	High	High	High	High		0.153	0.154	0.155	0.154	173.4	173.4	173.2	26.6	26.6	26.8	76.426	0	83.11	8	913	8
FALSE	High	IsMasterProtein	A8K8U1	cDNA FLJ77762, highly similar to Homo sapiens cullin-associated and neddylation-dissociated 1 (CAND1), mRNA OS=Homo sapiens PE=2 SV=1	0	14.533	2.11382	2	10	2	1	1230	136.2	5.83	High	High	High	Not Found	Peak Found	Peak Found			0.227	0.079	0.153		163	185.3		37	14.7	0.066	0	11.73	2	196	2
FALSE	High	IsMasterProtein	B2RDY9	Adenylyl cyclase-associated protein OS=Homo sapiens PE=2 SV=1	0	13.949	7.15789	2	10	2	1	475	51.6	8.22	Not Found	High	High	Not Found	Not Found	High			0.01	0.296	0.153		200	154.4			45.6	0.322	0	9.77	2	93	2
FALSE	High	IsMasterProtein	ch01i_P29317	Ephrin type-A receptor 2 OS=Homo sapiens GN=EPHA2 PE=1 SV=2	0	18.939	5.02049	4	14	4	1	976	108.2	6.23	High	High	High	Not Found	Peak Found	Not Found		0.01	0.437	0.01	0.152333	200	139.2	200		60.8		0.172	0	13.6	4	162	4
FALSE	High	IsMasterProtein	ch04u_O60701	UDP-glucose 6-dehydrogenase OS=Homo sapiens GN=UGDH PE=1 SV=1	0	4.98	3.84615	2	10	2	1	494	55	7.12	High	High	High	Not Found	Peak Found	Peak Found			0.155	0.148	0.1515		173.2	174.3		26.8	25.7	0.15	0	3.87	2	37	2
FALSE	High	IsMasterProtein	ch01i_P28070	Proteasome subunit beta type-4 OS=Homo sapiens GN=PSMB4 PE=1 SV=4	0	73.251	32.197	6	79	6	1	264	29.2	5.97	High	High	High	High	High	High		0.148	0.15	0.156	0.151333	174.1	174	173	25.9	26	27	11.328	0	88.61	6	1240	6
FALSE	High	IsMasterProtein	chXu_P62701	40S ribosomal protein S4, X isoform OS=Homo sapiens GN=RPS4X PE=1 SV=2	0	12.152	12.1673	4	18	4	1	263	29.6	10.15	High	High	High	Peak Found	High	Peak Found		0.182	0.122	0.15	0.151333	169.3	178.3	173.8	30.7	21.7	26.2	0.778	0	8.06	4	104	4
FALSE	High	IsMasterProtein	A0A0C4DGQ5	Calpain small subunit 1 OS=Homo sapiens GN=CAPNS1 PE=1 SV=1	0	10.506	7.76398	2	12	2	1	322	33.8	6.23	High	High	High	Peak Found	Peak Found	Peak Found		0.151	0.235	0.066	0.150667	173.7	162	187.5	26.3	38	12.5	0.311	0	14.85	2	243	2
FALSE	High	IsMasterProtein	ch17u_Q32Q12	Nucleoside diphosphate kinase OS=Homo sapiens GN=NME1-NME2 PE=1 SV=1	0	78.339	49.3151	10	187	2	1	292	32.6	8.48	High	High	High	Peak Found	Peak Found	Peak Found		0.149	0.151	0.152	0.150667	174.1	173.7	173.6	25.9	26.3	26.4	11.452	10	129.45	10	1574	10
FALSE	High	IsMasterProtein	ch14u_P28074	Proteasome subunit beta type-5 OS=Homo sapiens GN=PSMB5 PE=1 SV=3	0	119.67	26.616	7	250	7	1	263	28.5	6.92	High	High	High	High	High	High		0.152	0.151	0.148	0.150333	173.6	173.7	174.2	26.4	26.3	25.8	16.191	0	310.28	7	3947	7
FALSE	High	IsMasterProtein	A0A024RA52	Proteasome subunit alpha type OS=Homo sapiens GN=PSMA2 PE=1 SV=1	0	60.376	26.4957	5	51	5	1	234	25.9	7.43	High	High	High	High	High	High		0.149	0.144	0.158	0.150333	174.1	174.8	172.7	25.9	25.2	27.3	6.017	0	44.52	5	735	5
FALSE	High	IsMasterProtein	ch19u_P62249	40S ribosomal protein S16 OS=Homo sapiens GN=RPS16 PE=1 SV=2	0	13.871	37.6712	6	29	6	1	146	16.4	10.21	High	High	High	Peak Found	Peak Found	Peak Found		0.209	0.143	0.099	0.150333	165.5	175	182	34.5	25	18	2.162	0	12.36	5	135	6
FALSE	High	IsMasterProtein	A0A024RAI1	ARP3 actin-related protein 3 homolog (Yeast), isoform CRA_a OS=Homo sapiens GN=ACTR3 PE=3 SV=1	0	99.808	36.6029	11	71	11	1	418	47.3	5.88	High	High	High	Peak Found	High	Peak Found	Acetyl [N-Term]	0.138	0.163	0.147	0.149333	175.8	172	174.3	24.2	28	25.7	4.484	0	95.53	10	988	11
FALSE	High	IsMasterProtein	ch15i_P07355	Annexin A2 OS=Homo sapiens GN=ANXA2 PE=1 SV=2	0	311.555	56.9322	22	362	22	1	339	38.6	7.75	High	High	High	High	High	High	Acetyl [N-Term]	0.147	0.153	0.147	0.149	174.3	173.5	174.4	25.7	26.5	25.6	120.153	0	470.21	21	5408	22
FALSE	High	IsMasterProtein	ch14i_G3V5Z7	Proteasome subunit alpha type OS=Homo sapiens GN=PSMA6 PE=1 SV=1	0	132.011	45.6349	12	197	12	1	252	28.1	6.76	High	High	High	High	High	High		0.15	0.149	0.148	0.149	173.9	174	174.2	26.1	26	25.8	62.096	0	226.71	12	2684	12
FALSE	High	IsMasterProtein	D6R956	Ubiquitin carboxyl-terminal hydrolase OS=Homo sapiens GN=UCHL1 PE=1 SV=1	0	6.983	5.39419	1	6	1	1	241	26.8	5.81	Peak Found	High	High	High	Not Found	Peak Found		0.162		0.135	0.1485	172.1		176.2	27.9		23.8	0.334	0	6.85	1	43	1
FALSE	High	IsMasterProtein	ch22u_P09382	Galectin-1 OS=Homo sapiens GN=LGALS1 PE=1 SV=2	0	7.131	14.8148	2	12	2	1	135	14.7	5.5	High	High	High	Peak Found	Peak Found	Peak Found		0.136	0.136	0.17	0.147333	176	176.1	170.9	24	23.9	29.1	0.668	0	2.5	2	80	2
FALSE	High	IsMasterProtein	ch01u_P35268	60S ribosomal protein L22 OS=Homo sapiens GN=RPL22 PE=1 SV=2	0	8.39	19.5312	2	8	2	1	128	14.8	9.19	High	High	High	Peak Found	Peak Found	Peak Found		0.152	0.137	0.151	0.146667	173.7	175.9	173.7	26.3	24.1	26.3	1.154	0	6.28	2	127	2
FALSE	High	IsMasterProtein	P67936	Tropomyosin alpha-4 chain OS=Homo sapiens GN=TPM4 PE=1 SV=3	0	66.119	38.3065	10	64	6	1	248	28.5	4.69	High	High	High	Peak Found	Peak Found	Peak Found	Acetyl [N-Term]	0.152	0.14	0.147	0.146333	173.6	175.5	174.4	26.4	24.5	25.6	3.642	0	66.56	8	695	10
FALSE	High	IsMasterProtein	ch05i_P80723	Brain acid soluble protein 1 OS=Homo sapiens GN=BASP1 PE=1 SV=2	0	36.502	51.1013	4	28	4	1	227	22.7	4.63	High	High	High	High	High	High		0.14	0.147	0.15	0.145667	175.5	174.3	173.9	24.5	25.7	26.1	1.894	0	44.51	4	269	4
FALSE	High	IsMasterProtein	ch01i_P49721	Proteasome subunit beta type-2 OS=Homo sapiens GN=PSMB2 PE=1 SV=1	0	110.192	36.3184	9	182	9	1	201	22.8	7.02	High	High	High	High	High	High		0.137	0.148	0.146	0.143667	175.9	174.3	174.5	24.1	25.7	25.5	57.78	0	184.83	9	1881	9
FALSE	High	IsMasterProtein	ch06i_P07437	Tubulin beta chain OS=Homo sapiens GN=TUBB PE=1 SV=2	0	83.24	40.5405	12	69	4	1	444	49.6	4.89	High	High	High	High	Peak Found	High		0.144	0.157	0.128	0.143	174.8	172.8	177.3	25.2	27.2	22.7	3.489	8	89.29	12	887	12
FALSE	High	IsMasterProtein	ch11i_P25786-2	Isoform Long of Proteasome subunit alpha type-1 OS=Homo sapiens GN=PSMA1	0	139.008	33.829	9	288	9	1	269	30.2	6.99	High	High	High	High	High	High		0.14	0.141	0.14	0.140333	175.4	175.3	175.4	24.6	24.7	24.6	32.598	0	236.6	9	2951	9
FALSE	High	IsMasterProtein	B4DWA6	cDNA FLJ60094, highly similar to F-actin capping protein subunit beta OS=Homo sapiens PE=2 SV=1	0	7.636	7.16418	2	12	2	1	335	37.5	6.14	High	High	High	Peak Found	Peak Found	Peak Found		0.194	0.126	0.101	0.140333	167.5	177.7	181.6	32.5	22.3	18.4	0.233	0	8.2	2	82	2
FALSE	High	IsMasterProtein	Q8TDQ7	Glucosamine-6-phosphate isomerase 2 OS=Homo sapiens GN=GNPDA2 PE=1 SV=1	0	9.736	14.4928	3	12	1	1	276	31.1	6.95	Not Found	Not Found	High	Not Found	Not Found	Peak Found				0.14	0.14			175.4			24.6	0.468	0	6.44	3	123	3
FALSE	High	IsMasterProtein	B2RA03	cDNA, FLJ94640, highly similar to Homo sapiens keratin 18 (KRT18), mRNA OS=Homo sapiens PE=2 SV=1	0	9.791	7.67442	3	26	3	1	430	48	5.38	High	High	High	Peak Found	Peak Found	Peak Found		0.108	0.114	0.195	0.139	180.6	179.5	167.4	19.4	20.5	32.6	0.25	0	21.77	3	331	3
FALSE	High	IsMasterProtein	Q53FA7	Quinone oxidoreductase PIG3 OS=Homo sapiens GN=TP53I3 PE=1 SV=2	0	11.266	10.241	3	10	3	1	332	35.5	7.17	High	High	High	Peak Found	Not Found	Peak Found		0.155	0.01	0.251	0.138667	173.2	200	159.9	26.8		40.1	0.468	0	11.96	3	159	3
FALSE	High	IsMasterProtein	ch06u_A0A0U1RRH7	Histone H2A OS=Homo sapiens PE=3 SV=1	0.002	2.56	5.29412	1	6	1	1	170	18.5	11.52	Peak Found	High	High	High	Not Found	Not Found		0.138			0.138	175.7			24.3			0.52	0	0	1	15	1
FALSE	High	IsMasterProtein	ch19u_Q9NPH2	Inositol-3-phosphate synthase 1 OS=Homo sapiens GN=ISYNA1 PE=1 SV=1	0	4.945	2.86738	1	6	1	1	558	61	5.76	Not Found	High	High	Not Found	Peak Found	Not Found			0.265	0.01	0.1375		158	200		42		0.096	0	3.91	1	71	1
FALSE	High	IsMasterProtein	ch18i_J3QRS3	Myosin regulatory light chain 12A OS=Homo sapiens GN=MYL12A PE=1 SV=1	0.002	1.921	5.64972	1	2	1	1	177	20.4	4.75	High	Not Found	Not Found	Peak Found	Not Found	Not Found		0.137			0.137	175.9			24.1			0.212	0	0	1	27	1
FALSE	High	IsMasterProtein	ch11i_P46776	60S ribosomal protein L27a OS=Homo sapiens GN=RPL27A PE=1 SV=2	0	4.978	7.43243	1	6	1	1	148	16.6	11	High	High	High	Peak Found	Peak Found	Peak Found		0.156	0.101	0.15	0.135667	173	181.7	174	27	18.3	26	0.334	0	6.8	1	118	1
FALSE	High	IsMasterProtein	ch10i_P18669	Phosphoglycerate mutase 1 OS=Homo sapiens GN=PGAM1 PE=1 SV=2	0	67.088	34.6457	6	62	6	1	254	28.8	7.18	High	High	High	Peak Found	Peak Found	High		0.13	0.134	0.142	0.135333	176.9	176.4	175.1	23.1	23.6	24.9	4.412	0	87.64	6	803	6
FALSE	High	IsMasterProtein	ch09i_P10599	Thioredoxin OS=Homo sapiens GN=TXN PE=1 SV=3	0	4.748	12.381	1	6	1	1	105	11.7	4.92	High	High	High	Peak Found	Peak Found	Peak Found		0.118	0.147	0.14	0.135	178.8	174.3	175.4	21.2	25.7	24.6	0.389	0	6.06	1	80	1
FALSE	High	IsMasterProtein	ch01u_P53985	Monocarboxylate transporter 1 OS=Homo sapiens GN=SLC16A1 PE=1 SV=3	0.001	3.914	7.2	2	7	2	1	500	53.9	8.66	High	High	High	Peak Found	Peak Found	Peak Found		0.14	0.156	0.109	0.135	175.4	173.1	180.4	24.6	26.9	19.6	0.311	0	12.05	2	46	1
FALSE	High	IsMasterProtein	ch15u_P25789	Proteasome subunit alpha type-4 OS=Homo sapiens GN=PSMA4 PE=1 SV=1	0	67.735	30.2682	8	147	8	1	261	29.5	7.72	High	High	High	High	High	High		0.134	0.134	0.136	0.134667	176.4	176.3	176	23.6	23.7	24	7.577	0	151.4	8	1796	8
FALSE	High	IsMasterProtein	ch06i_P62269	40S ribosomal protein S18 OS=Homo sapiens GN=RPS18 PE=1 SV=3	0	11.279	18.4211	3	18	3	1	152	17.7	10.99	High	High	High	Peak Found	Peak Found	Peak Found		0.132	0.121	0.151	0.134667	176.6	178.4	173.7	23.4	21.6	26.3	0.778	0	12.62	3	161	3
FALSE	High	IsMasterProtein	ch07i_P62851	40S ribosomal protein S25 OS=Homo sapiens GN=RPS25 PE=1 SV=1	0.001	3.886	15.2	2	10	2	1	125	13.7	10.11	High	High	High	Not Found	Peak Found	Peak Found			0.129	0.14	0.1345		177.1	175.4		22.9	24.6	1.154	0	1.69	2	65	2
FALSE	High	IsMasterProtein	A0A109NGN6	Proteasome subunit alpha type OS=Homo sapiens PE=2 SV=1	0	82.829	39.4191	8	96	8	1	241	26.4	4.79	High	High	High	High	High	High		0.136	0.134	0.133	0.134333	176	176.3	176.5	24	23.7	23.5	22.101	0	111.85	8	1717	8
FALSE	High	IsMasterProtein	Q9UNM6-2	Isoform 2 of 26S proteasome non-ATPase regulatory subunit 13 OS=Homo sapiens GN=PSMD13	0	21.356	17.7249	6	28	6	1	378	42.9	6.54	High	High	High	Peak Found	Peak Found	Peak Found		0.138	0.141	0.124	0.134333	175.7	175.3	177.9	24.3	24.7	22.1	0.668	0	24.52	6	227	6
FALSE	High	IsMasterProtein	ch08i_Q92905	COP9 signalosome complex subunit 5 OS=Homo sapiens GN=COPS5 PE=1 SV=4	0	4.222	4.49102	2	7	2	1	334	37.6	6.54	High	High	High	Not Found	Not Found	Peak Found				0.134	0.134			176.3			23.7	0.259	0	8.38	2	67	1
FALSE	High	IsMasterProtein	ch06i_P20618	Proteasome subunit beta type-1 OS=Homo sapiens GN=PSMB1 PE=1 SV=2	0	93.618	40.6639	10	140	10	1	241	26.5	8.13	High	High	High	High	High	High		0.137	0.132	0.132	0.133667	175.9	176.6	176.8	24.1	23.4	23.2	14.849	0	150.57	10	1462	10
FALSE	High	IsMasterProtein	ch17i_Q9UNS2	COP9 signalosome complex subunit 3 OS=Homo sapiens GN=COPS3 PE=1 SV=3	0	14.031	2.83688	1	6	1	1	423	47.8	6.65	High	High	High	Peak Found	Peak Found	Peak Found	Acetyl [N-Term]	0.14	0.135	0.123	0.132667	175.5	176.1	178.1	24.5	23.9	21.9	0.186	0			248	1
FALSE	High	IsMasterProtein	ch17u_K7ES00	Histone H3.3 (Fragment) OS=Homo sapiens GN=H3F3B PE=1 SV=1	0.001	4.017	11.9205	2	13	2	1	151	16.6	11.84	High	High	High	Peak Found	High	Peak Found		0.116	0.132	0.15	0.132667	179.1	176.7	173.9	20.9	23.3	26.1	0.995	0	0	2	18	2
FALSE	High	IsMasterProtein	P08238	Heat shock protein HSP 90-beta OS=Homo sapiens GN=HSP90AB1 PE=1 SV=4	0	129.86	24.3094	17	143	6	1	724	83.2	5.03	High	High	High	Peak Found	Peak Found	Peak Found		0.14	0.124	0.132	0.132	175.4	177.9	176.7	24.6	22.1	23.3	2.615	1	164.89	17	1786	17
FALSE	High	IsMasterProtein	P05787-2	Isoform 2 of Keratin, type II cytoskeletal 8 OS=Homo sapiens GN=KRT8	0	24.846	5.08806	4	102	1	1	511	56.6	5.43	High	High	High	Peak Found	High	High		0.146	0.133	0.115	0.131333	174.6	176.5	179.4	25.4	23.5	20.6	0.484	0	84.56	4	469	4
FALSE	High	IsMasterProtein	ch01u_P62913	60S ribosomal protein L11 OS=Homo sapiens GN=RPL11 PE=1 SV=2	0	4.333	7.86517	1	6	1	1	178	20.2	9.6	High	High	High	Peak Found	Peak Found	Peak Found		0.13	0.155	0.108	0.131	177	173.2	180.5	23	26.8	19.5	0.292	0	5.68	1	105	1
FALSE	High	IsMasterProtein	ch02u_P61026	Ras-related protein Rab-10 OS=Homo sapiens GN=RAB10 PE=1 SV=1	0	22.257	26.5	4	42	2	1	200	22.5	8.38	High	High	High	Peak Found	Peak Found	Peak Found		0.139	0.107	0.144	0.13	175.5	180.6	174.8	24.5	19.4	25.2	1.254	2	31.87	4	323	4
FALSE	High	IsMasterProtein	ch20u_O14818	Proteasome subunit alpha type-7 OS=Homo sapiens GN=PSMA7 PE=1 SV=1	0	154.214	44.7581	13	219	6	1	248	27.9	8.46	High	High	High	High	Peak Found	High		0.129	0.13	0.128	0.129	177.1	177	177.3	22.9	23	22.7	99	9	222.41	13	2668	13
FALSE	High	IsMasterProtein	V9HW63	Epididymis secretory sperm binding protein Li 97n OS=Homo sapiens GN=HEL-S-97n PE=2 SV=1	0	52.688	24.3542	6	64	4	1	271	30.5	6.29	High	High	High	High	High	High		0.138	0.127	0.122	0.129	175.7	177.4	178.2	24.3	22.6	21.8	4.412	0	65.69	6	724	6
FALSE	High	IsMasterProtein	ch15i_Q7L5Y6-2	Isoform 2 of DET1 homolog OS=Homo sapiens GN=DET1	0.002	1.777	1.24777	1	4	1	1	561	65.1	7.71	High	High	High	Peak Found	Peak Found	Peak Found		0.132	0.127	0.126	0.128333	176.6	177.5	177.7	23.4	22.5	22.3	0.072	0			77	1
FALSE	High	IsMasterProtein	Q16881	Thioredoxin reductase 1, cytoplasmic OS=Homo sapiens GN=TXNRD1 PE=1 SV=3	0	81.289	20.339	9	72	9	1	649	70.9	7.39	High	High	High	High	High	High		0.13	0.119	0.135	0.128	177	178.7	176.2	23	21.3	23.8	1.336	0	109.98	9	1185	9
FALSE	High	IsMasterProtein	ch12u_P61224	Ras-related protein Rap-1b OS=Homo sapiens GN=RAP1B PE=1 SV=1	0	22.517	19.0217	4	50	4	1	184	20.8	5.78	High	High	High	High	High	High		0.142	0.069	0.168	0.126333	175.1	187.1	171.2	24.9	12.9	28.8	1.61	0	37.42	4	441	4
FALSE	High	IsMasterProtein	P05556	Integrin beta-1 OS=Homo sapiens GN=ITGB1 PE=1 SV=2	0	73.049	17.0426	10	65	10	1	798	88.4	5.39	High	High	High	Peak Found	High	Peak Found		0.117	0.134	0.127	0.126	179	176.3	177.4	21	23.7	22.6	1.239	0	74.53	10	929	9
FALSE	High	IsMasterProtein	D3DNI3	Profilin (Fragment) OS=Homo sapiens GN=PFN2 PE=3 SV=1	0	6.858	4.11765	1	4	1	1	340	35.5	10.2	Not Found	High	High	Not Found	Not Found	Peak Found				0.125	0.125			177.8			22.2	0.116	0	4.71	1	121	1
FALSE	High	IsMasterProtein	ch12u_P78371	T-complex protein 1 subunit beta OS=Homo sapiens GN=CCT2 PE=1 SV=4	0	31.952	18.6916	6	30	6	1	535	57.5	6.46	High	High	High	Peak Found	Peak Found	Not Found	Acetyl [N-Term]	0.165	0.196	0.01	0.123667	171.7	167.2	200	28.3	32.8		0.668	0	18	5	279	6
FALSE	High	IsMasterProtein	B4DHQ3	Phosphoserine aminotransferase OS=Homo sapiens PE=2 SV=1	0	21.751	11.0843	5	28	5	1	415	45.3	9.03	High	High	High	Peak Found	Peak Found	Peak Found		0.126	0.125	0.12	0.123667	177.6	177.7	178.6	22.4	22.3	21.4	0.54	0	36.14	5	366	5
FALSE	High	IsMasterProtein	ch02u_P27708	CAD protein OS=Homo sapiens GN=CAD PE=1 SV=3	0	121.521	13.1236	23	117	23	1	2225	242.8	6.46	High	High	High	High	Peak Found	High	Acetyl [N-Term]	0.113	0.133	0.124	0.123333	179.7	176.5	177.9	20.3	23.5	22.1	0.727	0	129.69	22	1304	23
FALSE	High	IsMasterProtein	ch02i_P61604	10 kDa heat shock protein, mitochondrial OS=Homo sapiens GN=HSPE1 PE=1 SV=2	0	18.696	46.0784	5	30	5	1	102	10.9	8.92	High	High	High	Peak Found	Peak Found	Peak Found		0.081	0.088	0.2	0.123	185	183.9	166.7	15	16.1	33.3	2.162	0	21.77	5	300	5
FALSE	High	IsMasterProtein	ch12u_P62805	Histone H4 OS=Homo sapiens GN=HIST1H4A PE=1 SV=2	0	12.75	20.3883	3	22	3	1	103	11.4	11.36	High	High	High	Peak Found	Peak Found	Peak Found		0.123	0.13	0.116	0.123	178.1	177	179.2	21.9	23	20.8	3.642	0	12.51	3	113	3
FALSE	High	IsMasterProtein	B2RD27	cDNA, FLJ96428, highly similar to Homo sapiens proteasome (prosome, macropain) 26S subunit, non-ATPase, 7 (Mov34 homolog) (PSMD7), mRNA OS=Homo sapiens PE=2 SV=1	0	19.893	16.6667	4	22	4	1	324	37	6.77	High	High	High	Peak Found	Peak Found	Peak Found		0.129	0.127	0.111	0.122333	177.1	177.5	180	22.9	22.5	20	0.848	0	24.66	4	164	4
FALSE	High	IsMasterProtein	ch11i_P01344-3	Isoform 3 of Insulin-like growth factor II OS=Homo sapiens GN=IGF2	0.001	3.127	3.81356	1	6	1	1	236	26.3	9.13	High	High	High	Peak Found	Peak Found	Peak Found		0.119	0.141	0.107	0.122333	178.8	175.3	180.6	21.2	24.7	19.4	0.194	0	1.65	1	32	1
FALSE	High	IsMasterProtein	ch14u_P25788	Proteasome subunit alpha type-3 OS=Homo sapiens GN=PSMA3 PE=1 SV=2	0	135.618	45.8824	12	212	11	1	255	28.4	5.33	High	High	High	High	High	High	Acetyl [N-Term]	0.124	0.123	0.119	0.122	178	178.1	178.7	22	21.9	21.3	162.789	1	219.8	11	2822	12
FALSE	High	IsMasterProtein	ch19i_Q7Z7M0	Multiple epidermal growth factor-like domains protein 8 OS=Homo sapiens GN=MEGF8 PE=1 SV=2	0.001	3.128	0.386643	1	2	1	1	2845	302.9	6.87	Not Found	Not Found	Peak Found	Not Found	Not Found	High				0.121	0.121			178.5			21.5	0.019	0	2.49	1	30	1
FALSE	High	IsMasterProtein	A5YM53	ITGAV protein OS=Homo sapiens GN=ITGAV PE=2 SV=1	0	28.002	5.34351	4	22	4	1	1048	116	5.74	High	High	High	High	Not Found	High		0.128		0.112	0.12	177.3		179.9	22.7		20.1	0.222	0	23.86	4	359	4
FALSE	High	IsMasterProtein	A8K4W0	40S ribosomal protein S3a OS=Homo sapiens GN=RPS3A PE=2 SV=1	0	17.352	17.803	4	12	4	1	264	29.9	9.73	High	High	High	Peak Found	Peak Found	Peak Found		0.16	0.065	0.135	0.12	172.4	187.9	176.2	27.6	12.1	23.8	0.624	0	12.66	4	120	4
FALSE	High	IsMasterProtein	ch08i_P00390	Glutathione reductase, mitochondrial OS=Homo sapiens GN=GSR PE=1 SV=2	0	26.181	18.3908	6	26	6	1	522	56.2	8.5	High	High	High	Peak Found	Peak Found	Peak Found		0.099	0.125	0.134	0.119333	182	177.7	176.4	18	22.3	23.6	0.61	0	36.45	6	235	6
FALSE	High	IsMasterProtein	V9HWC7	Epididymis secretory sperm binding protein Li 128m OS=Homo sapiens GN=HEL-S-128m PE=2 SV=1	0	15.771	17.4107	4	22	4	1	224	25	6.38	High	High	High	High	Peak Found	High		0.102	0.133	0.123	0.119333	181.4	176.5	178.1	18.6	23.5	21.9	1.054	0	14.8	4	118	4
FALSE	High	IsMasterProtein	ch01i_P30520	Adenylosuccinate synthetase isozyme 2 OS=Homo sapiens GN=ADSS PE=1 SV=3	0	20.649	10.5263	4	12	4	1	456	50.1	6.55	High	High	High	Peak Found	Not Found	Not Found		0.227		0.01	0.1185	163		200	37			0.389	0	13.73	4	335	4
FALSE	High	IsMasterProtein	Q8N7G1	Purine nucleoside phosphorylase OS=Homo sapiens PE=2 SV=1	0	32.382	26.6212	7	54	7	1	293	32.5	7.21	High	High	High	High	High	High		0.116	0.123	0.115	0.118	179.2	178	179.4	20.8	22	20.6	1.848	0	40.58	7	587	7
FALSE	High	IsMasterProtein	ch04u_D6RER5	Septin-11 OS=Homo sapiens GN=SEPT11 PE=1 SV=1	0	4.623	5.09259	2	9	2	1	432	49.8	6.68	High	High	High	Peak Found	Not Found	Not Found	Acetyl [N-Term]	0.118			0.118	178.9			21.1			0.194	0	5.25	1	70	2
FALSE	High	IsMasterProtein	A0A1C7CYX9	Dihydropyrimidinase-related protein 2 OS=Homo sapiens GN=DPYSL2 PE=1 SV=1	0	13.197	7.0901	3	11	3	1	677	73.5	6.35	High	High	High	Not Found	Peak Found	Not Found		0.01	0.332	0.01	0.117333	200	150.2	200		49.8		0.184	0	13.87	3	168	2
FALSE	High	IsMasterProtein	ch09i_Q9Y490	Talin-1 OS=Homo sapiens GN=TLN1 PE=1 SV=3	0	38.229	4.40771	7	23	7	1	2541	269.6	6.07	High	High	High	Peak Found	Peak Found	Not Found		0.091	0.25	0.01	0.117	183.2	160	200	16.8	40		0.107	0	30.77	7	431	6
FALSE	High	IsMasterProtein	A0A024RBS2	60S acidic ribosomal protein P0 OS=Homo sapiens GN=RPLP0 PE=3 SV=1	0	33.053	24.9211	4	37	4	1	317	34.3	5.97	High	High	High	Peak Found	High	High		0.136	0.109	0.106	0.117	176.1	180.3	180.8	23.9	19.7	19.2	1.069	0	35.22	4	493	4
FALSE	High	IsMasterProtein	P35270	Sepiapterin reductase OS=Homo sapiens GN=SPR PE=1 SV=1	0	7.092	5.74713	1	4	1	1	261	28	8.05	Not Found	High	High	Not Found	Peak Found	Not Found			0.223	0.01	0.1165		163.5	200		36.5		0.136	0	4.73	1	105	1
FALSE	High	IsMasterProtein	B4DR52	Histone H2B OS=Homo sapiens PE=2 SV=1	0	5.4	10.8434	2	11	2	1	166	18	10.32	High	High	High	Peak Found	Peak Found	Peak Found		0.11	0.111	0.11	0.110333	180.2	180.1	180.3	19.8	19.9	19.7	0.359	0	0	2	73	2
FALSE	High	IsMasterProtein	B4DLJ3	cDNA FLJ51495, highly similar to ADP-ribosylation factor 5 OS=Homo sapiens PE=2 SV=1	0	8.274	9.17031	2	10	1	1	229	25.4	7.66	High	High	High	Not Found	Not Found	Not Found			0.078	0.138	0.108		185.4	175.8		14.6	24.2	0.425	1	11.15	2	200	2
FALSE	High	IsMasterProtein	ch19i_P43686	26S protease regulatory subunit 6B OS=Homo sapiens GN=PSMC4 PE=1 SV=2	0	14.859	14.8325	4	16	4	1	418	47.3	5.21	High	High	High	Peak Found	Peak Found	Peak Found		0.129	0.09	0.101	0.106667	177.2	183.4	181.6	22.8	16.6	18.4	0.445	0	16.49	4	202	4
FALSE	High	IsMasterProtein	ch01u_P05026	Sodium/potassium-transporting ATPase subunit beta-1 OS=Homo sapiens GN=ATP1B1 PE=1 SV=1	0	5.427	9.24092	2	9	2	1	303	35	8.53	High	High	High	Peak Found	Peak Found	Not Found		0.136	0.077		0.1065	176	185.6		24	14.4		0.311	0	5.79	2	42	2
FALSE	Medium	IsMasterProtein	P28065	Proteasome subunit beta type-9 OS=Homo sapiens GN=PSMB9 PE=1 SV=2	0.014	1.164	4.10959	1	7	1	1	219	23.3	5.03	High	High	High	Peak Found	Peak Found	Peak Found		0.118	0.091	0.106	0.105	178.9	183.2	180.8	21.1	16.8	19.2	0.233	0	1.76	1	15	1
FALSE	High	IsMasterProtein	A8K4T6	cDNA FLJ76282, highly similar to Homo sapiens proteasome (prosome, macropain) 26S subunit, non-ATPase, 5 (PSMD5), mRNA OS=Homo sapiens PE=2 SV=1	0	10.236	5.55556	2	5	2	1	504	56.2	5.57	High	High	High	Peak Found	Not Found	Not Found	Acetyl [N-Term]	0.1			0.1	181.7			18.3			0.155	0	2.15	1	140	2
FALSE	High	IsMasterProtein	Q9Y315	Deoxyribose-phosphate aldolase OS=Homo sapiens GN=DERA PE=1 SV=2	0	28.846	26.4151	6	31	6	1	318	35.2	8.94	High	High	High	Peak Found	High	Not Found		0.096	0.102		0.099	182.6	181.4		17.4	18.6		1.081	0	29.05	6	390	6
FALSE	High	IsMasterProtein	ch09u_Q5SYQ7	Retinal dehydrogenase 1 (Fragment) OS=Homo sapiens GN=ALDH1A1 PE=1 SV=1	0	342.528	76.3547	14	482	1	1	203	22.6	6.04	High	High	High	Peak Found	Not Found	Not Found	Acetyl [N-Term]	0.276	0.01	0.01	0.0986667	156.8	200	200	43.2			8253.04	0	573.66	13	7602	14
FALSE	High	IsMasterProtein	ch17i_P43034	Platelet-activating factor acetylhydrolase IB subunit alpha OS=Homo sapiens GN=PAFAH1B1 PE=1 SV=2	0	10.855	6.34146	2	10	2	1	410	46.6	7.37	High	High	High	Peak Found	Peak Found	Not Found		0.096	0.101		0.0985	182.4	181.7		17.6	18.3		0.186	0	12.5	2	209	2
FALSE	High	IsMasterProtein	A8K3B0	cDNA FLJ77877, highly similar to Human ENO2 neuron specific (gamma) enolase OS=Homo sapiens PE=2 SV=1	0	47.231	17.9724	6	37	5	1	434	47.3	5.03	High	High	High	High	High	Peak Found		0.181	0.01	0.1	0.097	169.3	200	181.8	30.7		18.2	0.978	0	49.44	6	676	6
FALSE	High	IsMasterProtein	ch12i_F5H5D3	Tubulin alpha-1C chain OS=Homo sapiens GN=TUBA1C PE=1 SV=1	0	102.414	31.5992	12	118	5	1	519	57.7	5.07	High	High	High	High	High	Peak Found		0.094	0.114	0.082	0.0966667	182.9	179.6	184.8	17.1	20.4	15.2	3.894	8	133.73	11	1674	12
FALSE	High	IsMasterProtein	A8K9C4	Elongation factor 1-alpha OS=Homo sapiens PE=2 SV=1	0	57.989	32.684	11	82	11	1	462	50.2	9.01	High	High	High	High	Peak Found	High		0.098	0.088	0.096	0.094	182.2	183.7	182.5	17.8	16.3	17.5	2.311	0	98.73	11	759	11
FALSE	High	IsMasterProtein	Q01469	Fatty acid-binding protein, epidermal OS=Homo sapiens GN=FABP5 PE=1 SV=3	0.001	3.584	6.66667	1	2	1	1	135	15.2	7.01	High	Not Found	High	Peak Found	Not Found	Peak Found	Acetyl [N-Term]	0.098		0.09	0.094	182.1		183.5	17.9		16.5	0.259	0			62	1
FALSE	High	IsMasterProtein	ch14u_P23381	Tryptophan--tRNA ligase, cytoplasmic OS=Homo sapiens GN=WARS PE=1 SV=2	0	9.579	5.52017	2	12	2	1	471	53.1	6.23	High	High	High	Peak Found	Peak Found	Peak Found		0.157	0.086	0.038	0.0936667	172.8	184.2	192.7	27.2	15.8	7.3	0.166	0	10.11	2	125	2
FALSE	High	IsMasterProtein	Q59FI4	Importin 4 variant (Fragment) OS=Homo sapiens PE=2 SV=1	0	12.558	3.87658	3	8	3	1	1264	138.1	5.25	High	High	High	Not Found	Not Found	Peak Found			0.01	0.177	0.0935		200	169.9			30.1	0.107	0	8.83	3	61	3
FALSE	High	IsMasterProtein	ch10u_P00367	Glutamate dehydrogenase 1, mitochondrial OS=Homo sapiens GN=GLUD1 PE=1 SV=2	0	49.726	19.8925	9	59	9	1	558	61.4	7.8	High	High	High	Peak Found	Peak Found	Peak Found		0.068	0.135	0.074	0.0923333	187.3	176.2	186.2	12.7	23.8	13.8	0.896	0	79.68	9	914	8
FALSE	High	IsMasterProtein	P26038	Moesin OS=Homo sapiens GN=MSN PE=1 SV=3	0	14.299	9.18544	5	34	5	1	577	67.8	6.4	High	High	High	Not Found	Peak Found	Peak Found		0.01	0.039	0.228	0.0923333	200	192.5	162.9		7.5	37.1	0.324	0	14.82	5	210	5
FALSE	High	IsMasterProtein	B2RD51	Proteasome assembly chaperone 1 OS=Homo sapiens PE=2 SV=1	0	9.26	8.33333	2	7	2	1	288	32.9	7.17	High	High	High	Peak Found	Not Found	High	Acetyl [N-Term]	0.077		0.106	0.0915	185.8		180.8	14.2		19.2	0.501	0	1.89	1	107	2
FALSE	High	IsMasterProtein	ch17i_P61289-2	Isoform 2 of Proteasome activator complex subunit 3 OS=Homo sapiens GN=PSME3	0	17.689	18.7266	5	18	5	1	267	30.9	6.11	High	High	High	Peak Found	Peak Found	Peak Found	Acetyl [N-Term]	0.093	0.091	0.09	0.0913333	182.9	183.3	183.5	17.1	16.7	16.5	0.778	0	14.58	4	213	5
FALSE	High	IsMasterProtein	P15121	Aldose reductase OS=Homo sapiens GN=AKR1B1 PE=1 SV=3	0	58.501	36.0759	7	50	7	1	316	35.8	6.98	High	High	High	Not Found	Peak Found	High		0.01	0.141	0.121	0.0906667	200	175.3	178.4		24.7	21.6	2.34	0	64.66	7	494	7
FALSE	High	IsMasterProtein	ch02i_O00487	26S proteasome non-ATPase regulatory subunit 14 OS=Homo sapiens GN=PSMD14 PE=1 SV=1	0	6.492	7.09677	3	12	3	1	310	34.6	6.52	High	High	High	Not Found	Peak Found	Peak Found		0.01	0.141	0.119	0.09	200	175.3	178.7		24.7	21.3	0.468	0	12.08	3	58	3
FALSE	High	IsMasterProtein	P29401-2	Isoform 2 of Transketolase OS=Homo sapiens GN=TKT	0	104.484	24.8811	11	116	11	1	631	68.8	7.52	High	High	High	Peak Found	Peak Found	Peak Found		0.044	0.07	0.152	0.0886667	191.5	187	173.6	8.5	13	26.4	1.707	0	150.82	11	1885	11
FALSE	High	IsMasterProtein	ch21i_P50990	T-complex protein 1 subunit theta OS=Homo sapiens GN=CCT8 PE=1 SV=4	0	6.409	2.73723	1	6	1	1	548	59.6	5.6	High	High	High	Peak Found	Peak Found	Peak Found		0.06	0.105	0.094	0.0863333	188.7	181.1	182.9	11.3	18.9	17.1	0.058	0	8.46	1	101	1
FALSE	High	IsMasterProtein	B4DIM6	cDNA FLJ60015, highly similar to Adapter-related protein complex 1 sigma- 1B subunit OS=Homo sapiens PE=2 SV=1	0.002	2.521	4.34783	1	6	1	1	207	24.2	9.41	High	High	High	Peak Found	Peak Found	Peak Found		0.074	0.087	0.098	0.0863333	186.2	184	182.1	13.8	16	17.9	0.194	0	3.56	1	62	1
FALSE	High	IsMasterProtein	V9HWB4	Epididymis secretory sperm binding protein Li 89n OS=Homo sapiens GN=HEL-S-89n PE=2 SV=1	0	74.847	18.8073	9	51	9	1	654	72.3	5.16	High	High	High	Peak Found	Peak Found	Peak Found		0.078	0.101	0.075	0.0846667	185.5	181.7	186	14.5	18.3	14	0.962	0	69.2	9	776	9
FALSE	High	IsMasterProtein	ch06u_A0A0C4DFU2	Superoxide dismutase OS=Homo sapiens GN=SOD2 PE=1 SV=1	0	12.297	22.0721	4	15	4	1	222	24.7	8.25	High	High	High	Peak Found	Peak Found	Not Found		0.051	0.115		0.083	190.2	179.4		9.8	20.6		1.031	0	4.9	4	56	3
FALSE	High	IsMasterProtein	Q13011	Delta(3,5)-Delta(2,4)-dienoyl-CoA isomerase, mitochondrial OS=Homo sapiens GN=ECH1 PE=1 SV=2	0	40.859	23.7805	7	59	7	1	328	35.8	8	High	High	High	High	High	High		0.082	0.086	0.08	0.0826667	184.9	184.1	185.2	15.1	15.9	14.8	2.162	0	32.02	7	459	7
FALSE	High	IsMasterProtein	A0A024R718	Pre-B-cell colony enhancing factor 1, isoform CRA_a OS=Homo sapiens GN=PBEF1 PE=4 SV=1	0	7.478	6.10998	2	10	2	1	491	55.5	7.15	High	High	High	Not Found	Peak Found	Peak Found		0.01	0.11	0.125	0.0816667	200	180.2	177.8		19.8	22.2	0.166	0	13.29	2	59	2
FALSE	High	IsMasterProtein	Q9NZ08-2	Isoform 2 of Endoplasmic reticulum aminopeptidase 1 OS=Homo sapiens GN=ERAP1	0	5.308	1.37131	1	6	1	1	948	107.8	6.28	High	High	High	Not Found	Peak Found	Not Found		0.01	0.153		0.0815	200	173.5			26.5		0.042	0	6	1	68	1
FALSE	High	IsMasterProtein	ch07u_P41250	Glycine--tRNA ligase OS=Homo sapiens GN=GARS PE=1 SV=3	0	12.907	4.60081	2	18	2	1	739	83.1	7.03	High	High	High	Peak Found	Peak Found	Peak Found		0.016	0.108	0.113	0.079	196.8	180.5	179.6	3.2	19.5	20.4	0.094	0	17.7	2	250	2
FALSE	High	IsMasterProtein	ch05i_Q00765	Receptor expression-enhancing protein 5 OS=Homo sapiens GN=REEP5 PE=1 SV=3	0.002	1.792	5.29101	1	6	1	1	189	21.5	8.1	High	High	High	Peak Found	Not Found	Not Found		0.144	0.01		0.077	174.9	200		25.1			0.259	0	0	1	16	1
FALSE	High	IsMasterProtein	Q16658	Fascin OS=Homo sapiens GN=FSCN1 PE=1 SV=3	0	12.515	7.30223	3	14	3	1	493	54.5	7.24	High	High	High	Not Found	Peak Found	Peak Found			0.076	0.077	0.0765		185.8	185.7		14.2	14.3	0.269	0	16.56	3	68	3
FALSE	High	IsMasterProtein	B7Z268	Single-stranded DNA binding protein 1, isoform CRA_c OS=Homo sapiens GN=SSBP1 PE=2 SV=1	0	12.945	20.7547	3	26	3	1	159	18.5	10.1	High	High	High	Peak Found	Peak Found	High		0.071	0.079	0.076	0.0753333	186.7	185.4	185.8	13.3	14.6	14.2	1.031	0	19.42	3	341	3
FALSE	High	IsMasterProtein	B7Z7F0	cDNA FLJ56420, highly similar to Aspartyl aminopeptidase (EC 3.4.11.21) OS=Homo sapiens PE=2 SV=1	0	47.156	20.8925	7	51	7	1	493	54.5	7.72	High	High	High	High	Peak Found	Peak Found		0.128	0.051	0.037	0.072	177.3	190.3	192.8	22.7	9.7	7.2	1.555	0	56.88	7	471	7
FALSE	High	IsMasterProtein	P68366	Tubulin alpha-4A chain OS=Homo sapiens GN=TUBA4A PE=1 SV=1	0	91.465	34.1518	11	90	4	1	448	49.9	5.06	High	High	High	Peak Found	Peak Found	High		0.08	0.052	0.083	0.0716667	185.1	190	184.7	14.9	10	15.3	4.623	0	101.07	10	1103	11
FALSE	High	IsMasterProtein	ch02u_A0A087WUZ3	Spectrin beta chain, non-erythrocytic 1 OS=Homo sapiens GN=SPTBN1 PE=1 SV=1	0	34.724	5.19865	9	28	9	1	2366	274.7	5.57	High	High	High	Not Found	Not Found	High		0.01	0.01	0.195	0.0716667	200	200	167.4			32.6	0.153	0	28.65	9	183	8
FALSE	High	IsMasterProtein	Q8NBS9	Thioredoxin domain-containing protein 5 OS=Homo sapiens GN=TXNDC5 PE=1 SV=2	0	7.425	3.7037	1	6	1	1	432	47.6	5.97	High	High	High	Peak Found	Not Found	Peak Found		0.086	0.01	0.114	0.07	184.2	200	179.5	15.8		20.5	0.089	0	8.71	1	152	1
FALSE	High	IsMasterProtein	ch16u_Q9H773	dCTP pyrophosphatase 1 OS=Homo sapiens GN=DCTPP1 PE=1 SV=1	0	8.933	20	2	9	2	1	170	18.7	5.03	High	High	High	Not Found	Peak Found	Peak Found	Acetyl [N-Term]	0.01	0.101	0.096	0.069	200	181.7	182.4		18.3	17.6	0.52	0	5.3	1	158	2
FALSE	High	IsMasterProtein	ch19u_M0R0R2	40S ribosomal protein S5 OS=Homo sapiens GN=RPS5 PE=1 SV=1	0	8.163	10.2222	2	10	2	1	225	25.3	9.76	High	High	High	Not Found	Not Found	Peak Found			0.01	0.127	0.0685		200	177.5			22.5	0.468	0	9.36	2	140	2
FALSE	High	IsMasterProtein	Q53GQ2	COP9 constitutive photomorphogenic homolog subunit 7B variant (Fragment) OS=Homo sapiens PE=2 SV=1	0	12.824	14.0152	3	16	3	1	264	29.5	6.68	High	High	High	Peak Found	Peak Found	Peak Found		0.077	0.062	0.064	0.0676667	185.7	188.4	187.9	14.3	11.6	12.1	0.778	0	17.83	3	213	3
FALSE	High	IsMasterProtein	Q15366-2	Isoform 2 of Poly(rC)-binding protein 2 OS=Homo sapiens GN=PCBP2	0	12.112	10.3825	3	18	2	1	366	38.6	6.79	High	High	Not Found	Peak Found	Peak Found	Not Found		0.125	0.01		0.0675	177.8	200		22.2			0.585	2	11.27	3	167	3
FALSE	High	IsMasterProtein	ch20i_O14818-2	Isoform 2 of Proteasome subunit alpha type-7 OS=Homo sapiens GN=PSMA7	0	96.049	48.3146	8	138	1	1	178	20.2	8.51	Not Found	High	Not Found	Not Found	Peak Found	Not Found			0.062		0.062		188.3			11.7		23.245	0	135.76	7	1989	8
FALSE	High	IsMasterProtein	P23396	40S ribosomal protein S3 OS=Homo sapiens GN=RPS3 PE=1 SV=2	0	36.221	40.7407	9	38	9	1	243	26.7	9.66	High	High	High	Peak Found	Peak Found	Peak Found		0.078	0.01	0.097	0.0616667	185.5	198.5	182.3	14.5	1.5	17.7	1.976	0	33.11	9	339	9
FALSE	High	IsMasterProtein	ch11u_Q9BRL6	Serine/arginine-rich splicing factor 8 OS=Homo sapiens GN=SRSF8 PE=1 SV=1	0.001	3.192	2.83688	1	6	1	1	282	32.3	11.72	High	High	High	Not Found	Peak Found	Not Found			0.059		0.059		188.8			11.2		0.179	0	5.22	1	76	1
FALSE	High	IsMasterProtein	P30101	Protein disulfide-isomerase A3 OS=Homo sapiens GN=PDIA3 PE=1 SV=4	0	13.031	7.12871	3	16	3	1	505	56.7	6.35	High	High	High	Peak Found	Peak Found	Peak Found		0.061	0.039	0.074	0.058	188.6	192.6	186.2	11.4	7.4	13.8	0.233	0	19.36	3	192	3
FALSE	High	IsMasterProtein	Q9NQC3	Reticulon-4 OS=Homo sapiens GN=RTN4 PE=1 SV=2	0	11.112	2.2651	2	18	2	1	1192	129.9	4.5	High	High	High	Peak Found	Peak Found	Peak Found		0.056	0.052	0.06	0.056	189.4	190.2	188.6	10.6	9.8	11.4	0.086	0	24.89	2	107	2
FALSE	High	IsMasterProtein	A0A140VK70	Testis secretory sperm-binding protein Li 197a OS=Homo sapiens PE=2 SV=1	0	23.26	16.6282	6	22	6	1	433	48.6	5.95	High	High	High	Not Found	Peak Found	Peak Found		0.01	0.014	0.143	0.0556667	200	197.2	174.9		2.8	25.1	0.562	0	25.76	6	177	6
FALSE	High	IsMasterProtein	ch14u_A0A087X2I1	26S protease regulatory subunit 10B OS=Homo sapiens GN=PSMC6 PE=1 SV=1	0	22.181	13.8958	4	20	4	1	403	45.8	7.78	High	High	High	Not Found	Peak Found	Peak Found		0.01	0.05	0.106	0.0553333	200	190.6	180.8		9.4	19.2	0.374	0	26.83	4	285	4
FALSE	High	IsMasterProtein	A8K781	cDNA FLJ75299, highly similar to Xenopus laevis proteasome (prosome, macropain) 26S subunit, ATPase 3, mRNA OS=Homo sapiens PE=2 SV=1	0	21.53	15.8392	4	16	4	1	423	47.3	5.22	High	High	High	Peak Found	Not Found	Not Found	Acetyl [N-Term]	0.146	0.01	0.01	0.0553333	174.5	200	200	25.5			0.425	0	18.94	3	260	4
FALSE	High	IsMasterProtein	P00492	Hypoxanthine-guanine phosphoribosyltransferase OS=Homo sapiens GN=HPRT1 PE=1 SV=2	0	11.084	11.9266	2	6	2	1	218	24.6	6.68	High	High	High	Not Found	Not Found	Peak Found				0.055	0.055			189.6			10.4	0.425	0	4.65	2	81	2
FALSE	High	IsMasterProtein	ch02i_Q99832	T-complex protein 1 subunit eta OS=Homo sapiens GN=CCT7 PE=1 SV=2	0	11.116	6.99816	5	20	5	1	543	59.3	7.65	High	High	High	Peak Found	Not Found	Peak Found		0.093	0.01	0.057	0.0533333	183.1	200	189.3	16.9		10.7	0.377	0	12.5	5	137	5
FALSE	High	IsMasterProtein	O95373	Importin-7 OS=Homo sapiens GN=IPO7 PE=1 SV=1	0	19.432	3.08285	2	14	2	1	1038	119.4	4.82	High	High	High	Peak Found	Not Found	Not Found		0.135	0.01	0.01	0.0516667	176.2	200	200	23.8			0.151	0	15.02	2	142	2
FALSE	High	IsMasterProtein	P00734	Prothrombin OS=Homo sapiens GN=F2 PE=1 SV=2	0	12.277	7.71704	4	27	4	1	622	70	5.9	High	High	High	Not Found	Peak Found	Peak Found		0.01	0.134	0.01	0.0513333	200	176.3	200		23.7		0.301	0	21.38	4	191	3
FALSE	High	IsMasterProtein	ch17i_O00232	26S proteasome non-ATPase regulatory subunit 12 OS=Homo sapiens GN=PSMD12 PE=1 SV=3	0	33.872	15.7895	6	33	6	1	456	52.9	7.65	High	High	High	Peak Found	Peak Found	Not Found		0.059	0.081	0.01	0.05	188.9	185	200	11.1	15		0.607	0	38.98	6	400	6
FALSE	High	IsMasterProtein	B4DPD5	Ubiquitin thioesterase OS=Homo sapiens PE=2 SV=1	0	8.798	8.11688	2	10	2	1	308	35.2	5.59	High	High	High	Peak Found	Not Found	Not Found		0.129	0.01	0.01	0.0496667	177.1	200	200	22.9			0.311	0	6.17	2	113	2
FALSE	High	IsMasterProtein	B2R8N1	cDNA, FLJ93976, highly similar to Homo sapiens COP9 homolog (COP9), mRNA OS=Homo sapiens PE=2 SV=1	0	4.441	7.17703	1	5	1	1	209	23.2	5.38	Not Found	High	High	Not Found	Not Found	Peak Found				0.047	0.047			191			9	0.259	0	0	1	47	1
FALSE	Medium	IsMasterProtein	Q14019	Coactosin-like protein OS=Homo sapiens GN=COTL1 PE=1 SV=3	0.017	1.044	4.22535	1	3	1	1	142	15.9	5.67	Not Found	High	High	Not Found	Peak Found	Not Found			0.073	0.01	0.0415		186.3	200		13.7		0.259	0	0	1	0	1
FALSE	High	IsMasterProtein	ch15i_P39687	Acidic leucine-rich nuclear phosphoprotein 32 family member A OS=Homo sapiens GN=ANP32A PE=1 SV=1	0	24.361	14.4578	4	28	3	1	249	28.6	4.09	High	High	High	Not Found	Peak Found	Not Found			0.071	0.01	0.0405		186.7	200		13.3		2.511	0	35.12	4	315	4
FALSE	High	IsMasterProtein	chXu_A0A0J9YXQ7	Dedicator of cytokinesis protein 11 (Fragment) OS=Homo sapiens GN=DOCK11 PE=1 SV=1	0.004	1.56	27.5	1	1	1	1	40	4.8	4.78	Not Found	High	Not Found	Not Found	Peak Found	Not Found			0.039		0.039		192.4			7.6		1.154	0			0	1
FALSE	High	IsMasterProtein	B5BUB5	Autoantigen La (Fragment) OS=Homo sapiens GN=SSB PE=2 SV=1	0	19.154	9.06863	4	16	4	1	408	46.8	7.12	High	High	High	Not Found	Not Found	Peak Found		0.01	0.01	0.096	0.0386667	200	200	182.5			17.5	0.374	0	17.67	4	236	4
FALSE	High	IsMasterProtein	ch10i_P18206	Vinculin OS=Homo sapiens GN=VCL PE=1 SV=4	0	29.917	7.58377	5	24	5	1	1134	123.7	5.66	High	High	High	Not Found	Peak Found	Peak Found		0.01	0.071	0.021	0.034	200	186.7	195.8		13.3	4.2	0.179	0	23.9	5	263	5
FALSE	High	IsMasterProtein	ch12i_P14625	Endoplasmin OS=Homo sapiens GN=HSP90B1 PE=1 SV=1	0	29.837	9.09091	5	32	4	1	803	92.4	4.84	High	High	High	Peak Found	Not Found	Not Found		0.082	0.01	0.01	0.034	184.8	200	200	15.2			0.372	0	42.2	5	399	5
FALSE	High	IsMasterProtein	Q59EG8	Proteasome 26S non-ATPase subunit 2 variant (Fragment) OS=Homo sapiens PE=2 SV=1	0	18.584	5.80504	3	20	3	1	913	100.5	5.15	High	High	High	Not Found	Peak Found	Peak Found		0.01	0.033	0.053	0.032	200	193.7	190		6.3	10	0.126	0	27.75	3	274	3
FALSE	High	IsMasterProtein	D9ZGG2	Vitronectin OS=Homo sapiens GN=VTN PE=4 SV=1	0	8.883	3.13808	1	19	1	1	478	54.3	5.8	High	High	High	Peak Found	Peak Found	Peak Found		0.032	0.031	0.028	0.0303333	193.8	193.9	194.6	6.2	6.1	5.4	0.105	0	20.37	1	324	1
FALSE	High	IsMasterProtein	ch07u_P40926	Malate dehydrogenase, mitochondrial OS=Homo sapiens GN=MDH2 PE=1 SV=3	0	32.425	31.6568	6	24	6	1	338	35.5	8.68	High	High	High	Peak Found	Not Found	Not Found		0.065	0.01	0.01	0.0283333	187.9	200	200	12.1			0.738	0	26.34	6	386	6
FALSE	High	IsMasterProtein	A8K3C3	T-complex protein 1 subunit delta OS=Homo sapiens PE=2 SV=1	0	20.024	7.79221	3	19	3	1	539	57.9	7.83	High	High	High	Not Found	Not Found	Peak Found		0.01		0.046	0.028	200		191.2			8.8	0.199	0	24.1	3	244	2
FALSE	High	IsMasterProtein	ch05i_Q96CN7	Isochorismatase domain-containing protein 1 OS=Homo sapiens GN=ISOC1 PE=1 SV=3	0	17.403	17.4497	5	22	5	1	298	32.2	7.39	High	High	High	Peak Found	Peak Found	Peak Found		0.019	0.033	0.029	0.027	196.2	193.6	194.3	3.8	6.4	5.7	1.054	0	22.09	5	279	5
FALSE	High	IsMasterProtein	Q8TDJ5	Tyrosine-protein kinase receptor OS=Homo sapiens GN=TFG/ALK fusion PE=2 SV=1	0	6.793	1.4944	2	14	2	1	803	88.6	6.33	High	High	High	High	High	Peak Found		0.024	0.023	0.025	0.024	195.3	195.5	195.1	4.7	4.5	4.9	0.166	0	7.06	2	56	2
FALSE	High	IsMasterProtein	ch17i_Q04695	Keratin, type I cytoskeletal 17 OS=Homo sapiens GN=KRT17 PE=1 SV=2	0	40.203	15.7407	10	101	2	1	432	48.1	5.02	High	High	High	Not Found	Peak Found	Not Found		0.01	0.033	0.01	0.0176667	200	193.5	200		6.5		1.062	0	81.9	10	335	10
FALSE	High	IsMasterProtein	P26641	Elongation factor 1-gamma OS=Homo sapiens GN=EEF1G PE=1 SV=3	0	24.006	11.4416	4	28	4	1	437	50.1	6.67	High	High	High	Peak Found	Peak Found	Peak Found	Acetyl [N-Term]	0.016	0.015	0.015	0.0153333	196.9	197	197.1	3.1	3	2.9	0.509	0	29.23	3	387	4
FALSE	High	IsMasterProtein	ch22u_P30566	Adenylosuccinate lyase OS=Homo sapiens GN=ADSL PE=1 SV=2	0	6.75	4.13223	2	12	2	1	484	54.9	7.11	High	High	High	Not Found	Peak Found	Not Found		0.01	0.022	0.01	0.014	200	195.7	200		4.3		0.16	0	9.04	2	132	2
FALSE	High	IsMasterProtein	P04259	Keratin, type II cytoskeletal 6B OS=Homo sapiens GN=KRT6B PE=1 SV=5	0	100.617	31.5603	18	323	0	1	564	60	8	Not Found	Not Found	Not Found	Not Found	Not Found	Not Found		0.01	0.01	0.012	0.0106667	200	198.4	197.5		1.6	2.5	2.831	11	324.86	18	3688	18
FALSE	High	IsMasterProtein	ch17i_P02533	Keratin, type I cytoskeletal 14 OS=Homo sapiens GN=KRT14 PE=1 SV=4	0	87.004	36.8644	18	220	6	1	472	51.5	5.16	High	High	High	Peak Found	Peak Found	Not Found		0.01	0.012	0.01	0.0106667	198.3	197.6	200	1.7	2.4		2.268	10	234.72	18	2344	18
FALSE	High	IsMasterProtein	ch02u_P02751	Fibronectin OS=Homo sapiens GN=FN1 PE=1 SV=4	0	720.327	25.3562	42	797	1	1	2386	262.5	5.71	High	High	High	Not Found	Not Found	Not Found		0.01	0.01	0.01	0.01	200	200	200				6.028	0	1133.46	42	15750	42
FALSE	High	IsMasterProtein	H6VRG1	Keratin 1 OS=Homo sapiens GN=KRT1 PE=3 SV=1	0	463.343	51.7829	33	864	30	1	645	66.1	8.12	High	High	High	Not Found	Peak Found	Not Found		0.01	0.01	0.01	0.01	200	199.9	200		0.1		34.697	3	1203.73	33	18372	32
FALSE	High	IsMasterProtein	ch17u_P35527	Keratin, type I cytoskeletal 9 OS=Homo sapiens GN=KRT9 PE=1 SV=3	0	231.017	51.3644	21	370	21	1	623	62	5.24	High	High	High	Peak Found	Peak Found	Not Found		0.01	0.01	0.01	0.01	200	199.2	200	0	0.8		6.627	0	498.23	21	7826	21
FALSE	High	IsMasterProtein	P02774-3	Isoform 3 of Vitamin D-binding protein OS=Homo sapiens GN=GC	0	206.369	9.12779	6	159	6	1	493	55.1	5.74	High	High	High	Peak Found	Peak Found	Peak Found		0.01	0.01	0.01	0.01	198.3	199.4	198.1	1.7	0.6	1.9	3.299	0	279.05	6	4353	6
FALSE	High	IsMasterProtein	ch12i_P35908	Keratin, type II cytoskeletal 2 epidermal OS=Homo sapiens GN=KRT2 PE=1 SV=2	0	200.07	55.8685	29	504	20	1	639	65.4	8	High	High	High	Not Found	Not Found	Not Found		0.01	0.01	0.01	0.01	200	200	200		0		6.252	7	497.46	29	5666	29
FALSE	High	IsMasterProtein	ch17u_P13645	Keratin, type I cytoskeletal 10 OS=Homo sapiens GN=KRT10 PE=1 SV=6	0	197.457	42.1233	25	522	23	1	584	58.8	5.21	High	High	High	Peak Found	Peak Found	Peak Found		0.01	0.01	0.01	0.01	199.5	199.3	199.2	0.5	0.7	0.8	19.962	2	539.82	25	5938	24
FALSE	High	IsMasterProtein	P68032	Actin, alpha cardiac muscle 1 OS=Homo sapiens GN=ACTC1 PE=1 SV=1	0	155.525	33.1565	12	316	1	1	377	42	5.39	Not Found	Not Found	Not Found	Not Found	Not Found	Not Found		0.01	0.01	0.01	0.01	200	200	200				23.621	1	315.07	12	3636	12
FALSE	High	IsMasterProtein	ch02i_Q6S8J3	POTE ankyrin domain family member E OS=Homo sapiens GN=POTEE PE=1 SV=3	0	115.244	9.76744	7	228	1	1	1075	121.3	6.2	High	High	High	Not Found	Peak Found	Not Found		0.01		0.01	0.01	200		200				0.988	0	246.24	7	3176	7
FALSE	High	IsMasterProtein	P48668	Keratin, type II cytoskeletal 6C OS=Homo sapiens GN=KRT6C PE=1 SV=3	0	100.259	31.5603	18	287	1	1	564	60	8	High	High	High	Not Found	Not Found	Not Found		0.01	0.01	0.01	0.01	200	200	200				2.594	1	288.01	18	3342	18
FALSE	High	IsMasterProtein	P08779	Keratin, type I cytoskeletal 16 OS=Homo sapiens GN=KRT16 PE=1 SV=4	0	96.835	33.4038	17	214	7	1	473	51.2	5.05	High	High	High	Not Found	Not Found	Not Found		0.01	0.01	0.01	0.01	200	200	200				2.49	0	223.98	17	2156	17
FALSE	High	IsMasterProtein	F6KPG5	Albumin (Fragment) OS=Homo sapiens PE=2 SV=1	0	92.473	20.6838	11	978	2	1	585	66.5	6.04	High	High	High	Not Found	Not Found	Not Found		0.01	0.01	0.01	0.01	200	200	200				2.938	0	603.72	11	10022	9
FALSE	High	IsMasterProtein	H0YA55	Serum albumin (Fragment) OS=Homo sapiens GN=ALB PE=1 SV=1	0	83.305	16.5198	11	938	2	1	454	51.5	6.95	High	High	Not Found	Not Found	Not Found	Not Found	Acetyl [N-Term]	0.01	0.01	0.01	0.01	200	200	200	0		0	3.642	12	599.25	9	10031	9
FALSE	High	IsMasterProtein	P13647	Keratin, type II cytoskeletal 5 OS=Homo sapiens GN=KRT5 PE=1 SV=3	0	70.165	26.7797	17	251	10	1	590	62.3	7.74	High	High	High	Not Found	Not Found	Peak Found		0.01	0.01	0.01	0.01	200	200	199.1			0.9	2.728	0	210.15	17	2050	17
FALSE	High	IsMasterProtein	B7Z2N5	cDNA FLJ51840, highly similar to Alpha-actinin-2 OS=Homo sapiens PE=2 SV=1	0	62.789	15.193	10	128	1	1	803	92.9	5.81	Not Found	Not Found	High	Not Found	Not Found	Not Found				0.01	0.01			200				0.675	0	151	9	1410	10
FALSE	High	IsMasterProtein	D3DRR6	Inter-alpha (Globulin) inhibitor H2, isoform CRA_a OS=Homo sapiens GN=ITIH2 PE=4 SV=1	0	53.757	5.59662	6	154	6	1	947	106.5	6.95	High	High	High	Not Found	Not Found	Peak Found		0.01	0.01	0.01	0.01	200	200	199.8			0.2	0.509	0	180.33	6	2384	6
FALSE	High	IsMasterProtein	P01023	Alpha-2-macroglobulin OS=Homo sapiens GN=A2M PE=1 SV=3	0	50.143	6.78426	8	347	5	1	1474	163.2	6.46	High	High	High	Peak Found	Peak Found	Peak Found		0.01	0.01	0.01	0.01	200	200	199.9	0	0	0.1	0.401	5	302.36	8	3937	8
FALSE	High	IsMasterProtein	ch02u_P10809	60 kDa heat shock protein, mitochondrial OS=Homo sapiens GN=HSPD1 PE=1 SV=2	0	45.984	15.3578	6	34	6	1	573	61	5.87	High	High	High	Not Found	Not Found	Not Found		0.01	0.01	0.01	0.01	200	200	200				0.565	0	44.88	6	667	6
FALSE	High	IsMasterProtein	B2R950	cDNA, FLJ94213, highly similar to Homo sapiens pregnancy-zone protein (PZP), mRNA OS=Homo sapiens PE=2 SV=1	0	42.81	4.04858	5	208	2	1	1482	163.8	6.38	High	High	High	Not Found	Peak Found	Not Found		0.01	0.01	0.01	0.01	200	199.2	200		0.8		0.334	0	181.9	5	1466	5
FALSE	High	IsMasterProtein	ch03i_Q06033	Inter-alpha-trypsin inhibitor heavy chain H3 OS=Homo sapiens GN=ITIH3 PE=1 SV=2	0	39.397	5.73034	5	58	5	1	890	99.8	5.74	High	High	High	Not Found	Not Found	Not Found		0.01	0.01	0.01	0.01	200	200	200				0.442	0	73.76	5	603	5
FALSE	High	IsMasterProtein	C0JYY2	Apolipoprotein B (Including Ag(X) antigen) OS=Homo sapiens GN=APOB PE=4 SV=1	0	37.112	2.23537	10	44	10	1	4563	515.2	7.05	High	High	High	Not Found	Not Found	Not Found		0.01	0.01	0.01	0.01	200	200	200				0.08	0	41.16	10	374	10
FALSE	High	IsMasterProtein	ch04u_J3KMX3	Alpha-fetoprotein OS=Homo sapiens GN=AFP PE=1 SV=1	0	36.107	4.01929	3	49	3	1	622	70.4	5.55	High	High	High	Not Found	Not Found	Not Found		0.01	0.01	0.01	0.01	200	200	200				0.401	0	70.33	3	913	3
FALSE	High	IsMasterProtein	ch12u_Q7Z794	Keratin, type II cytoskeletal 1b OS=Homo sapiens GN=KRT77 PE=2 SV=3	0	36.015	7.43945	5	236	2	1	578	61.9	5.99	High	High	High	Not Found	Peak Found	Peak Found		0.01	0.01	0.01	0.01	200	199.3	199.3		0.7	0.7	0.808	0	205.54	5	1969	5
FALSE	High	IsMasterProtein	P12035	Keratin, type II cytoskeletal 3 OS=Homo sapiens GN=KRT3 PE=1 SV=3	0	33.284	10.3503	9	113	2	1	628	64.4	6.48	Not Found	High	High	Not Found	Not Found	Not Found			0.01		0.01		200					0.778	0	83.65	9	527	8
FALSE	High	IsMasterProtein	ch06i_A0A0G2JPR0	Complement C4-A OS=Homo sapiens GN=C4A PE=1 SV=1	0	25.455	3.38303	6	65	6	1	1744	192.8	7.03	High	High	High	Not Found	Not Found	Not Found		0.01	0.01	0.01	0.01	200	200	200				0.212	0	48.95	6	435	6
FALSE	High	IsMasterProtein	ch02i_P02461	Collagen alpha-1(III) chain OS=Homo sapiens GN=COL3A1 PE=1 SV=4	0	25.202	1.90996	2	36	2	1	1466	138.5	6.61	High	High	High	Not Found	Not Found	Not Found		0.01	0.01	0.01	0.01	200	200	200				0.119	0	33.29	2	636	2
FALSE	High	IsMasterProtein	A0A0K2BMD8	Mutant hemoglobin alpha 2 globin chain OS=Homo sapiens GN=HBA2 PE=3 SV=1	0	22.548	34.507	5	68	5	1	142	15.2	8.68	High	High	High	Not Found	Not Found	Not Found		0.01	0.01	0.01	0.01	200	200	200				4.623	0	84.79	5	723	5
FALSE	High	IsMasterProtein	B2RAN2	cDNA, FLJ95014, highly similar to Homo sapiens vanin 1 (VNN1), mRNA OS=Homo sapiens PE=2 SV=1	0	21.406	3.7037	1	8	1	1	513	57	5.57	High	High	High	Not Found	Not Found	Not Found		0.01	0.01	0.01	0.01	200	200	200				0.186	0	17.23	1	316	1
FALSE	High	IsMasterProtein	ch22i_P35579	Myosin-9 OS=Homo sapiens GN=MYH9 PE=1 SV=4	0	21.37	3.57143	5	18	5	1	1960	226.4	5.6	High	High	High	Not Found	Not Found	Not Found		0.01		0.01	0.01	200		200				0.093	0	14.41	5	130	5
[truncated: 158 more rows]

## Sheet: A549_Hx_EVs_pSILAC
Checked	Protein FDR Confidence	Master	Accession	Description	Exp. q-value	Sum PEP Score	Coverage	# Peptides	# PSMs	# Unique Peptides	# Protein Groups	# AAs	MW [kDa]	calc. pI	Found in Sample: [S23] F12: Light, Control	Found in Sample: [S21] F11: Light, Control	Found in Sample: [S19] F10: Light, Control	Found in Sample: [S24] F12: Heavy, Sample	Found in Sample: [S22] F11: Heavy, Sample	Found in Sample: [S20] F10: Heavy, Sample	Modifications	Abundance Ratio: (F12, Heavy) / (F12, Light)	Abundance Ratio: (F11, Heavy) / (F11, Light)	Abundance Ratio: (F10, Heavy) / (F10, Light)	Abundances (Scaled): F12: Light, Control	Abundances (Scaled): F11: Light, Control	Abundances (Scaled): F10: Light, Control	Abundances (Scaled): F12: Heavy, Sample	Abundances (Scaled): F11: Heavy, Sample	Abundances (Scaled): F10: Heavy, Sample	emPAI	# Razor Peptides	Score Sequest HT	# Peptides Sequest HT	Score Mascot	# Peptides Mascot
[truncated: 1,045 more rows]

[truncated: 6 more sheets: Hx_EVs_Sorted, Nx_EVs_vs_Hx_EVs , Gene Symbols, Nx and Hx, Nx or Hx only, protein similar btwn Nx & Hx]
